# Supplementary material for: Multi-Target Chemometric Modelling, Fragment Analysis and Virtual Screening with ERK Inhibitors as Potential Anticancer Agents
Source: MDPI journal article supplement (doi:10.3390/molecules24213909), 2019-10-30
Supplement: s1 [file s1]

## Supporting Information

# Multi-Target Chemometric Modelling, Fragment Analysis and Virtual Screening with ERK Inhibitors as Potential Anticancer Agents

Amit Kumar Halder \*, Amal Kanta Giri and Maria Natália Dias Soeiro Cordeiro \*

Department of Chemistry and Biochemistry, University of Porto, 4169-007 Porto, Portugal

\* Correspondence: amit.halder@fc.up.pt (A.K.H.); ncordeir@fc.up.pt (M.N.D.S.C.);

Tel.: +351-22-040-2502 (M.N.D.S.C)

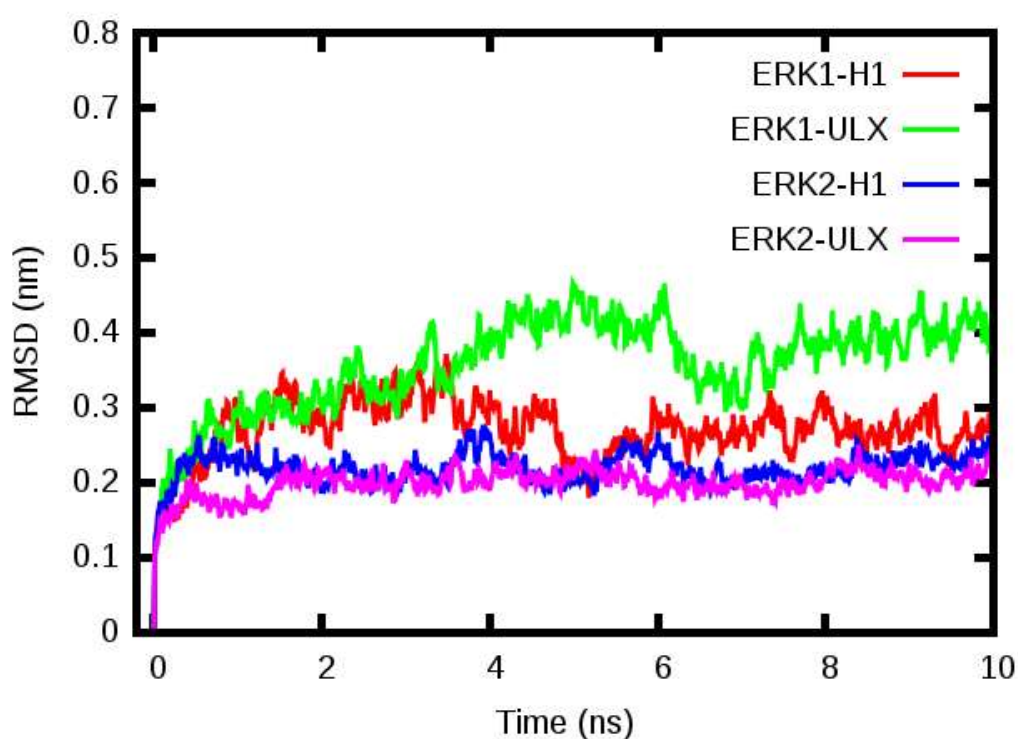

**Figure S1.** The root mean square deviation (RMSD) plots of backbone atoms of the receptor-ligand complexes.

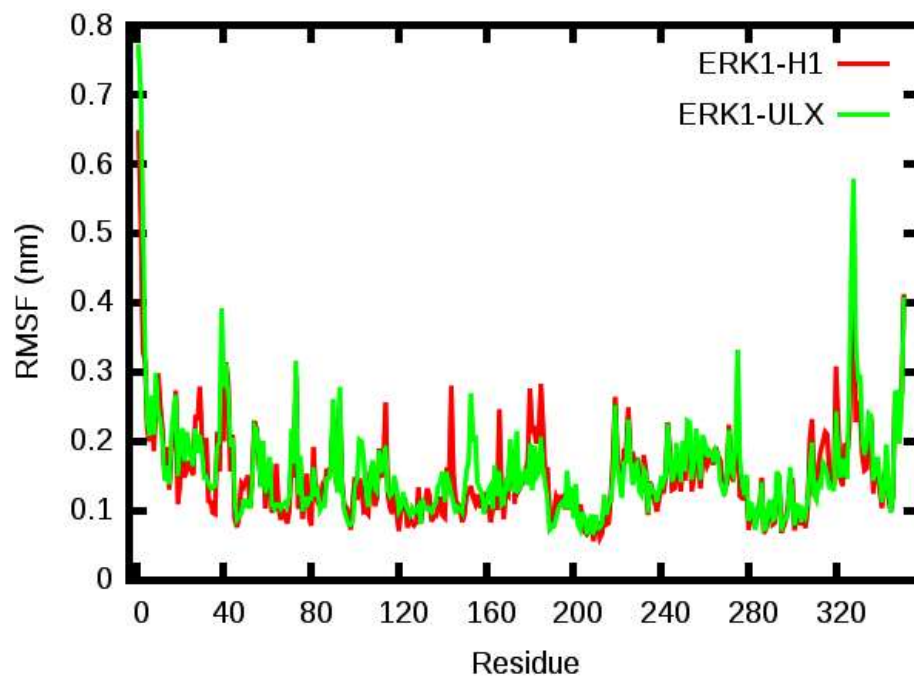

**Figure S2.** The root mean square fluctuation (RMSF) plots of ERK-1 complexes.

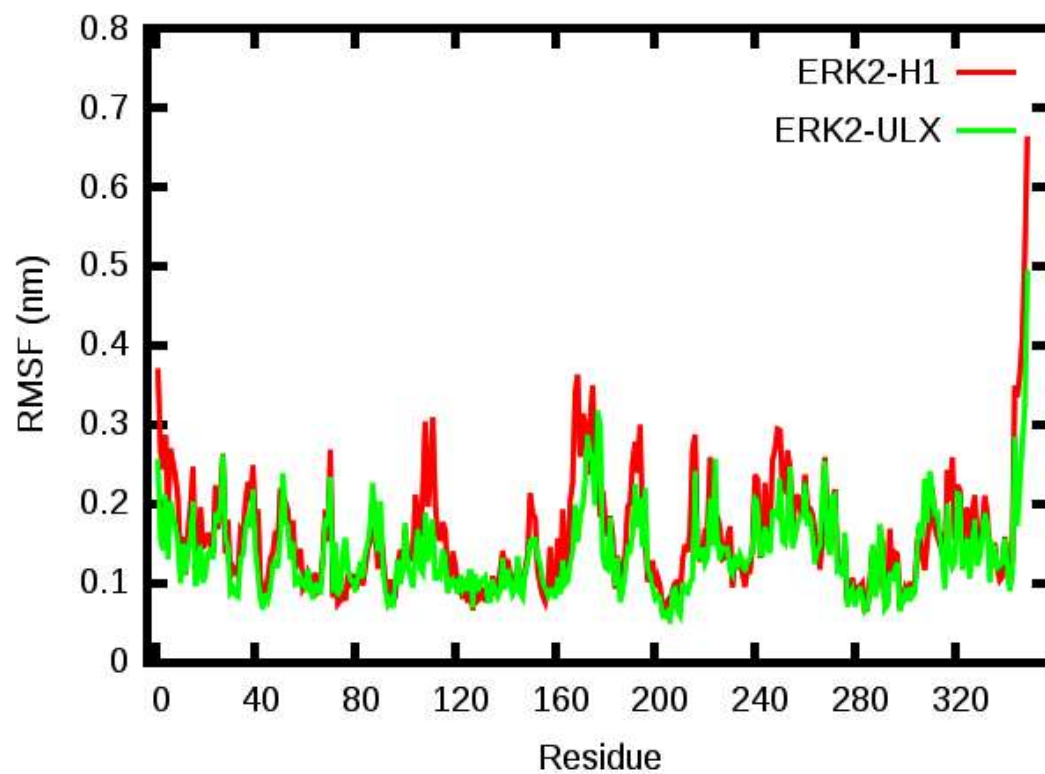

**Figure S3.** The root mean square fluctuation (RMSF) plots of ERK-2 complexes.

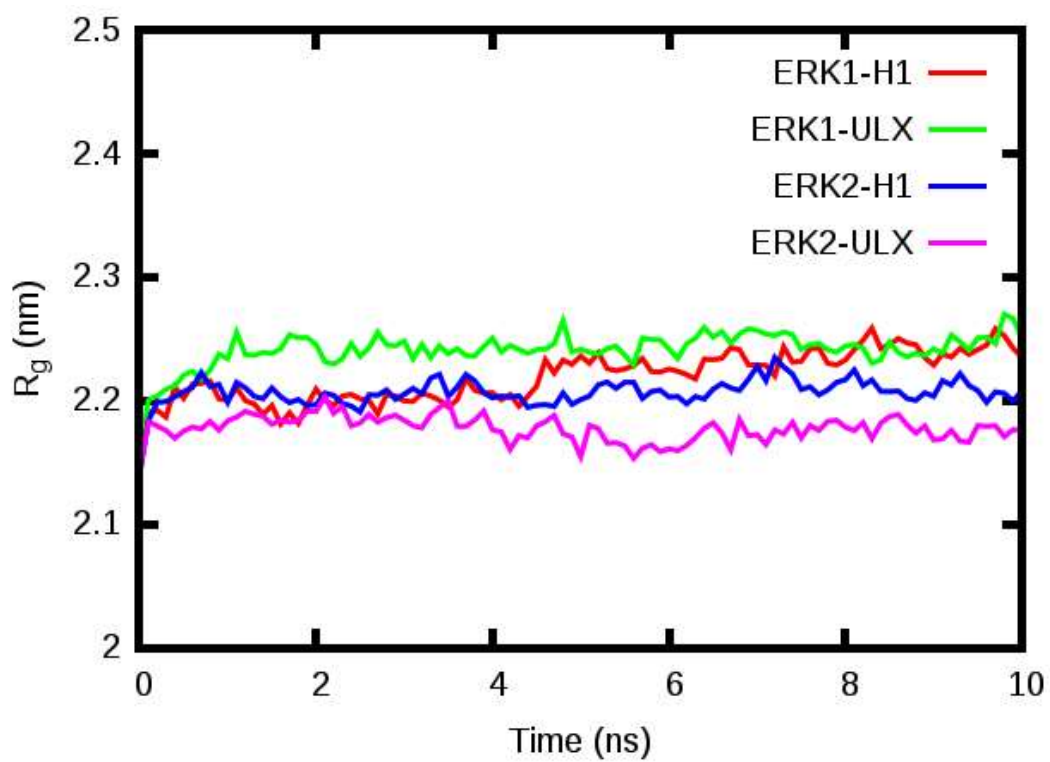

**Figure S4.** The radius of gyration ( $R_g$ ) plots of ERK-1 and ERK-2 complexes

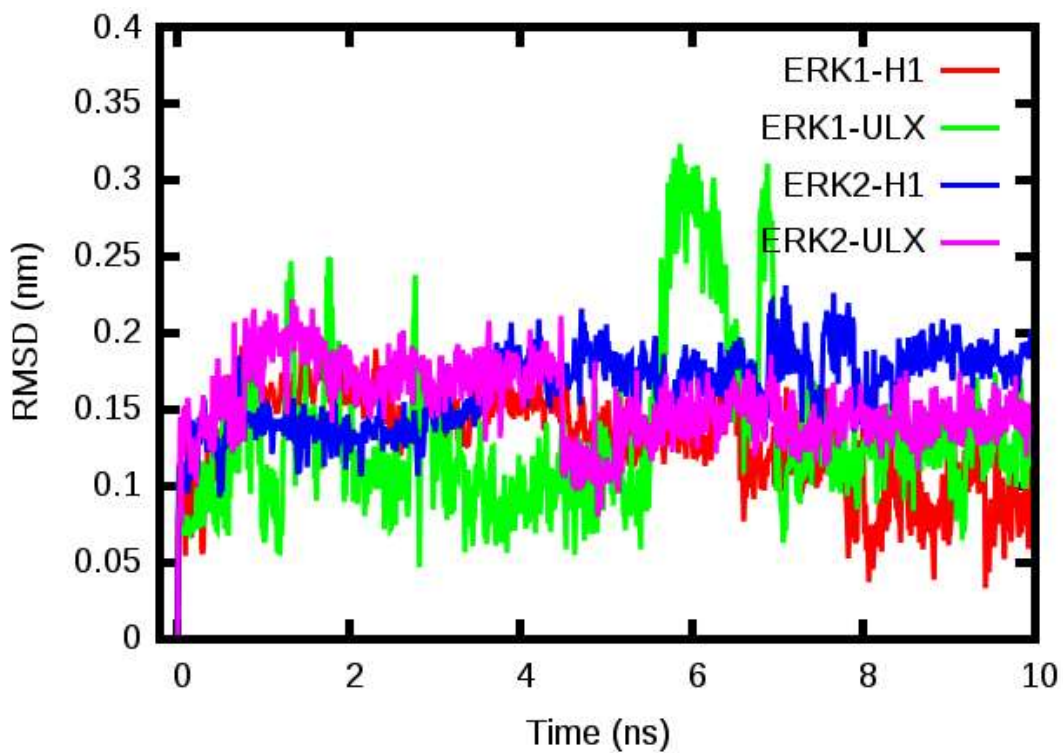

**Figure S5.** The root mean square deviation (RMSD) plots of bound ligands of the receptor-ligand complexes.

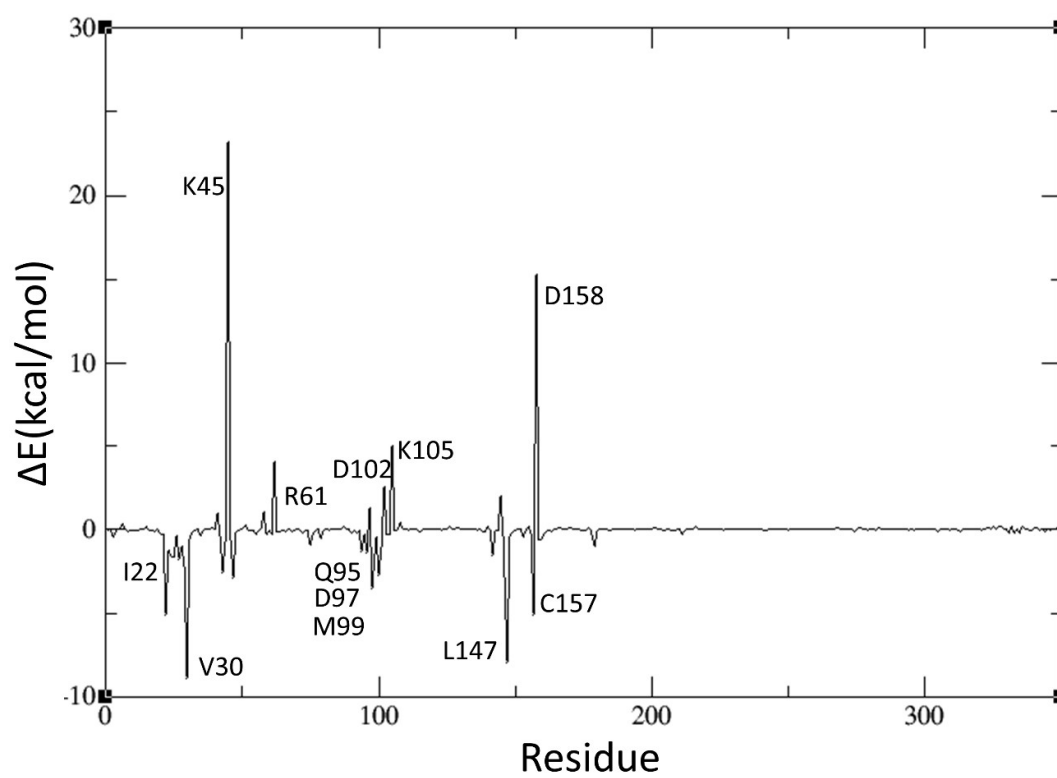

**Figure S6.** Per-residue decomposition profile of ERK2-ULX complex
