# Supplementary material for: Multi-Target Chemometric Modelling, Fragment Analysis and Virtual Screening with ERK Inhibitors as Potential Anticancer Agents
Source: Molecules. 2019 Oct 30;24(21):3909. doi: 10.3390/molecules24213909 (PMC6864583; doi:10.3390/molecules24213909)
Supplement: Supplementary file 1 [file molecules-24-03909-s001.zip]

Archive with 4 entries (4 files):
- SM1.pdf
- SM1.xlsx
- SM2.xlsx
- SM3.xlsx
