# Supplementary material for: Multi-Target Chemometric Modelling, Fragment Analysis and Virtual Screening with ERK Inhibitors as Potential Anticancer Agents
Source: Molecules. 2019 Oct 30;24(21):3909. doi: 10.3390/molecules24213909 (PMC6864583; doi:10.3390/molecules24213909)
Supplement: Supplementary file 1 [file molecules-24-03909-s001.zip › SM1.xlsx]

## Sheet: FP
Multi-target chemometric modelling, fragment analysis and virtual screening with ERK inhibitors as potential anticancer agents
Amit Kumar Halder, Amal Kanta Giri and Maria Natália Dias Soeiro Cordeiro
Department of Chemistry and Biochemistry, University of Porto, 4169-007 Porto, Portugal

## Sheet: Modeling set
Cpd	Molecule ChEMBL ID	Smiles	me	Standard Relation	Standard Value	IAi(cj)	bt	Set	Pred IAi(cj)_LDA	PosteriorProb.(-1)	PosteriorProb.(1)	Status(AD)
Cpd0002	CHEMBL453737	COc1cc2c(Oc3ccc(cc3F)C4=CN=C(Nc5ccc(F)cc5)N(C)C4=O)ccnc2cc1OCCCN6CCOCC6	IC50	>	100000	-1	MAP kinase ERK1	Sub-train	1	0.223763	0.776237	In
Cpd0003	CHEMBL2204532	CN(c1ccc(F)c(NC(=O)c2cccc(OC(C)(C)C#N)c2Cl)c1)c3ccc4nc(NC(=O)C5CC5)sc4n3	IC50	>	10000	-1	MAP kinase ERK1	Sub-train	-1	0.553652	0.446348	In
Cpd0004	CHEMBL1006	NCCCNCCSP(=O)(O)O	IC50	=	Not Active	-1	MAP kinase ERK1	Sub-train	1	0.273041	0.726959	Outlier
Cpd0005	CHEMBL1687	[Cl-].COc1cc2CC[N+](C)(C)[C@@H]3Cc4ccc(O)c(Oc5cc6[C@H](Cc7ccc(Oc(c1O)c23)cc7)N(C)CCc6cc5OC)c4	IC50	=	Not Active	-1	MAP kinase ERK1	Sub-train	-1	0.980495	0.0195053	In
Cpd0006	CHEMBL2420909	C1CCC2(CCN(CC2)c3ncnc4[nH]cnc34)NC1	IC50	=	60000	-1	MAP kinase ERK1	Sub-train	-1	0.934919	0.0650808	In
Cpd0008	CHEMBL400630	O=C1Nc2cc(CN3CCOCC3)ccc2CN1c4csc(n4)c5ccncc5	IC50	>	10000	-1	MAP kinase ERK1	Sub-train	1	0.209671	0.790329	In
Cpd0010	CHEMBL240799	O=C1Nc2ccccc2CN1c3csc(n3)c4ccncc4	IC50	>	10000	-1	MAP kinase ERK1	Sub-train	1	0.449208	0.550792	In
Cpd0011	CHEMBL258457	COC(=O)C1=C(c2ccccc2)c3cc(Br)ccc3C(=O)N1CCc4ccccc4	IC50	>	1100	-1	MAP kinase ERK1	Sub-train	-1	0.932289	0.0677111	In
Cpd0013	CHEMBL259934	COC(=O)C1=C(c2ccccc2)c3cc(Br)ccc3C(=O)N1Cc4ccccc4	IC50	>	1100	-1	MAP kinase ERK1	Sub-train	-1	0.9469	0.0531	In
Cpd0014	CHEMBL259544	OC(=O)C1=C(c2ccccc2)c3cc(Br)ccc3C(=O)N1CC4CCCCC4	IC50	>	1100	-1	MAP kinase ERK1	Test	-1	0.983717	0.0162835	In
Cpd0015	CHEMBL648	CN1CCN(CC1)C(c2ccccc2)c3ccccc3	IC50	=	Not Active	-1	MAP kinase ERK1	Sub-train	-1	0.980809	0.0191914	In
Cpd0017	CHEMBL1201151	COc1ccc2[C@H]3CC[C@@]4(C)[C@@H](CC[C@@]4(O)C#C)[C@@H]3CCc2c1	IC50	=	Not Active	-1	MAP kinase ERK1	Sub-train	-1	0.981402	0.0185975	In
Cpd0018	CHEMBL13209	[O-][N+](=O)c1ccc2NC(=O)CN=C(c3ccccc3)c2c1	IC50	=	Not Active	-1	MAP kinase ERK1	Sub-train	-1	0.951639	0.0483607	In
Cpd0019	CHEMBL46	Cc1nccn1CC2CCc3c(C2=O)c4ccccc4n3C	IC50	=	Not Active	-1	MAP kinase ERK1	Sub-train	-1	0.990819	0.00918096	In
Cpd0020	CHEMBL245416	N[C@@H](CN1C=CC(=O)C(=C1)O)C(=O)O	IC50	=	Not Active	-1	MAP kinase ERK1	Sub-train	-1	0.997531	0.00246881	In
Cpd0021	CHEMBL1196	CCCOc1ccc(cc1N)C(=O)OCCN(CC)CC	IC50	=	Not Active	-1	MAP kinase ERK1	Sub-train	-1	0.870601	0.129399	In
Cpd0022	CHEMBL728	CN1CCN(CCCN2c3ccccc3Sc4ccc(Cl)cc24)CC1	IC50	=	Not Active	-1	MAP kinase ERK1	Sub-train	-1	0.998318	0.00168224	In
Cpd0024	CHEMBL1909072	NC(=O)C1CCN(CCCN2c3ccccc3Sc4ccc(Cl)cc24)CC1	IC50	=	Not Active	-1	MAP kinase ERK1	Sub-train	-1	0.987503	0.0124968	In
Cpd0025	CHEMBL418971	CC(C)(c1ccc(O)cc1)c2ccc(O)cc2	IC50	=	Not Active	-1	MAP kinase ERK1	Sub-train	-1	0.984045	0.0159552	In
Cpd0026	CHEMBL40583	Cc1ccc2cc3c(ccc4ccccc34)c5CCc1c25	IC50	=	Not Active	-1	MAP kinase ERK1	Sub-train	-1	0.959031	0.040969	In
Cpd0027	CHEMBL711	O=C1C(C(=O)c2ccccc12)c3ccccc3	IC50	=	Not Active	-1	MAP kinase ERK1	Sub-train	-1	0.934365	0.0656352	In
Cpd0030	CHEMBL215803	C[C@@H]1C[C@H]2CN1CCn3nc4c(cccc4c3O)c5nc6c(O2)cccc6nc5O	IC50	>	1000	-1	MAP kinase ERK1	Sub-train	-1	0.920918	0.079082	In
Cpd0031	CHEMBL77155	CC(C)n1cnc2c(NCC=C(C)C)nc(N)nc12	IC50	=	90000	-1	MAP kinase ERK1	Sub-train	-1	0.966662	0.0333377	In
Cpd0033	CHEMBL293492	O=C\C=C\c1ccccc1	IC50	=	Not Active	-1	MAP kinase ERK1	Sub-train	-1	0.971615	0.0283851	In
Cpd0035	CHEMBL768	COC(=O)CCc1ccc(OCC(O)CNC(C)C)cc1	IC50	=	Not Active	-1	MAP kinase ERK1	Sub-train	-1	0.868313	0.131687	In
Cpd0036	CHEMBL272888	CN1CCN(CC1)c2ccc(Nc3ncc(NC(=O)c4cc(NC(=O)c5cccc(c5)C(F)(F)F)ccc4C)cn3)cc2	IC50	>	100000	-1	MAP kinase ERK1	Sub-train	1	0.0219834	0.978017	In
Cpd0039	CHEMBL75680	CCCCc1c([nH]c2nccnc12)c3ccc(O)cc3	IC50	=	18000	-1	MAP kinase ERK1	Test	-1	0.958457	0.041543	In
Cpd0040	CHEMBL110691	CC(=O)O[C@@]1(CC[C@H]2[C@@H]3C=C(Cl)C4=CC(=O)CC[C@]4(C)[C@H]3CC[C@]12C)C(=O)C	IC50	=	Not Active	-1	MAP kinase ERK1	Sub-train	-1	0.971418	0.0285822	In
Cpd0041	CHEMBL964	CCN(CC)C(=S)SSC(=S)N(CC)CC	IC50	=	1510	-1	MAP kinase ERK1	Sub-train	-1	0.996943	0.00305732	Outlier
Cpd0042	CHEMBL1766	C[C@@H]1C[C@H]2[C@@H]3CCC4=CC(=O)C=C[C@]4(C)[C@@]3(F)[C@@H](O)C[C@]2(C)[C@H]1C(=O)CO	IC50	=	Not Active	-1	MAP kinase ERK1	Sub-train	-1	0.991793	0.00820747	In
Cpd0044	CHEMBL404520	CN(C)[C@H]1[C@@H]2C[C@H]3C(=C(O)[C@]2(O)C(=O)C(=C1O)C(=O)N)C(=O)c4c(O)ccc(Cl)c4[C@@]3(C)O	IC50	=	Not Active	-1	MAP kinase ERK1	Sub-train	-1	0.997164	0.00283585	In
Cpd0046	CHEMBL428880	OC(COc1cccc2OC(=CC(=O)c12)C(=O)O)COc3cccc4OC(=CC(=O)c34)C(=O)O	IC50	=	Not Active	-1	MAP kinase ERK1	Sub-train	-1	0.727318	0.272682	In
Cpd0047	CHEMBL549	CN(C)CCCC1(OCc2cc(ccc12)C#N)c3ccc(F)cc3	IC50	=	Not Active	-1	MAP kinase ERK1	Sub-train	-1	0.969725	0.0302748	In
Cpd0048	CHEMBL1518	CCCC1=CC(=O)NC(=S)N1	IC50	=	Not Active	-1	MAP kinase ERK1	Sub-train	-1	0.999482	0.000517655	In
Cpd0049	CHEMBL205596	C[C@H](CCC(=O)O)[C@H]1CC[C@H]2[C@@H]3[C@H](O)C[C@@H]4C[C@H](O)CC[C@]4(C)[C@H]3C[C@H](O)[C@]12C	IC50	=	Not Active	-1	MAP kinase ERK1	Test	-1	0.996834	0.00316556	In
Cpd0051	CHEMBL49080	CC(C)(C)NCC(O)c1cc(Cl)c(N)c(Cl)c1	IC50	=	Not Active	-1	MAP kinase ERK1	Sub-train	-1	0.998165	0.0018352	In
Cpd0052	CHEMBL1567463	C[N+](C)(C)CCOP(=O)([O-])OC[C@H](O)CO	IC50	=	Not Active	-1	MAP kinase ERK1	Test	1	0.489106	0.510894	Outside-AD
Cpd0053	CHEMBL234926	OCC=C	IC50	=	Not Active	-1	MAP kinase ERK1	Sub-train	-1	0.999427	0.000572841	Outlier
Cpd0054	CHEMBL742	CNC1(CCCCC1=O)c2ccccc2Cl	IC50	=	Not Active	-1	MAP kinase ERK1	Sub-train	-1	0.997773	0.00222658	In
Cpd0055	CHEMBL1234833	CC(C)c1cnn2c(NCc3ccccc3)cc(N[C@@H](CO)[C@H](O)CO)nc12	IC50	=	3730	-1	MAP kinase ERK1	Sub-train	-1	0.954649	0.0453505	In
Cpd0057	CHEMBL765	NC(=N)NCCN1CCCCCCC1	IC50	=	Not Active	-1	MAP kinase ERK1	Sub-train	-1	0.997728	0.00227222	In
Cpd0060	CHEMBL456807	NNc1ccccc1	IC50	=	Not Active	-1	MAP kinase ERK1	Sub-train	-1	0.846989	0.153011	In
Cpd0061	CHEMBL1909073	[Br-].CC[N+]1(CCOC(=O)C(O)(c2ccccc2)c3ccccc3)CCCCC1	IC50	=	Not Active	-1	MAP kinase ERK1	Sub-train	-1	0.987823	0.0121769	In
Cpd0063	CHEMBL828	N1c2ccccc2Sc3ccccc13	IC50	=	Not Active	-1	MAP kinase ERK1	Sub-train	-1	0.99723	0.00276966	In
Cpd0064	CHEMBL92401	CC(C)NNC(=O)c1ccncc1	IC50	=	Not Active	-1	MAP kinase ERK1	Test	-1	0.873025	0.126975	In
Cpd0066	CHEMBL1413	CC1=CC(=O)N(O)C(=C1)C2CCCCC2	IC50	=	Not Active	-1	MAP kinase ERK1	Sub-train	-1	0.992975	0.00702469	In
Cpd0067	CHEMBL1200559	CC(O)C(=O)O	IC50	=	Not Active	-1	MAP kinase ERK1	Test	-1	0.999097	0.000902966	In
Cpd0068	CHEMBL14	[Cl-].C[N+](C)(C)CCOC(=O)N	IC50	=	Not Active	-1	MAP kinase ERK1	Sub-train	-1	0.999809	0.000190803	Outlier
Cpd0069	CHEMBL1490	OC(CCN1CCCCC1)(C2CCCCC2)c3ccccc3	IC50	=	Not Active	-1	MAP kinase ERK1	Sub-train	-1	0.988183	0.0118171	In
Cpd0070	CHEMBL221886	CN[C@@H]1[C@@H](O)[C@@H](O[C@H]2[C@H](N)C[C@H](N)[C@@H](O[C@H]3OC(=CC[C@H]3N)CN)[C@@H]2O)OC[C@]1(C)O	IC50	=	Not Active	-1	MAP kinase ERK1	Sub-train	-1	0.981135	0.0188652	In
Cpd0071	CHEMBL1762	CC(N)C(=O)Nc1c(C)cccc1C	IC50	=	Not Active	-1	MAP kinase ERK1	Sub-train	-1	0.981564	0.0184363	In
Cpd0072	CHEMBL6437	CN1CCN2C(C1)c3ccccc3Cc4ccccc24	IC50	=	Not Active	-1	MAP kinase ERK1	Sub-train	-1	0.989242	0.0107578	In
Cpd0073	CHEMBL573	OC(=O)c1cccnc1	IC50	=	Not Active	-1	MAP kinase ERK1	Sub-train	-1	0.787566	0.212434	In
Cpd0074	CHEMBL496	Oc1c(Cl)cc(Cl)c(Cl)c1Cc2c(O)c(Cl)cc(Cl)c2Cl	IC50	=	2484.4	-1	MAP kinase ERK1	Sub-train	-1	0.998206	0.00179373	In
Cpd0077	CHEMBL578	CCOC(=O)[C@H](CCc1ccccc1)N[C@@H](C)C(=O)N2CCC[C@H]2C(=O)O	IC50	=	Not Active	-1	MAP kinase ERK1	Sub-train	-1	0.961506	0.0384944	In
Cpd0081	CHEMBL1042	CC(C)CCC[C@@H](C)[C@H]1CC[C@H]2\C(=C\C=C/3\C[C@@H](O)CCC3=C)\CCC[C@]12C	IC50	=	Not Active	-1	MAP kinase ERK1	Test	-1	0.990799	0.00920149	In
Cpd0082	CHEMBL659	COc1ccc2CN(C)CC[C@@]34C=C[C@H](O)C[C@@H]3Oc1c24	IC50	=	Not Active	-1	MAP kinase ERK1	Sub-train	-1	0.999472	0.000527914	In
Cpd0083	CHEMBL47244	CC(=C)[C@@H]1[C@H]2OC(=O)[C@@H]1[C@]3(O)C[C@H]4O[C@]45C(=O)O[C@H]2[C@]35C	IC50	=	Not Active	-1	MAP kinase ERK1	Sub-train	-1	0.998092	0.00190842	In
Cpd0085	CHEMBL541	OC(=O)c1ccccc1	IC50	=	Not Active	-1	MAP kinase ERK1	Test	-1	0.958902	0.0410982	In
Cpd0086	CHEMBL523435	COc1cccc2c(coc12)C3=C(C(=O)NC3=O)c4cn(C)c5cc(I)c(F)cc45	IC50	=	Not Active	-1	MAP kinase ERK1	Sub-train	-1	0.902422	0.0975777	In
Cpd0091	CHEMBL280998	Oc1ccccc1O	IC50	=	Not Active	-1	MAP kinase ERK1	Sub-train	-1	0.997937	0.00206347	In
Cpd0100	CHEMBL487894	[Na+].CN(CS(=O)(=O)[O-])C1=C(C)N(C)N(C1=O)c2ccccc2	IC50	=	Not Active	-1	MAP kinase ERK1	Test	-1	0.993393	0.00660665	In
Cpd0103	CHEMBL1788116	OC(=O)C(F)(F)F.OC(=O)C(F)(F)F.N#C\C(=C/1\Nc2ccccc2S1)\c3ccnc(NCCc4cccnc4)n3	IC50	>	10000	-1	MAP kinase ERK1	Test	-1	0.563518	0.436482	In
Cpd0104	CHEMBL1140	NC(=O)c1cccnc1	IC50	=	Not Active	-1	MAP kinase ERK1	Sub-train	-1	0.832725	0.167275	In
Cpd0106	CHEMBL276832	NNc1nncc2ccccc12	IC50	=	Not Active	-1	MAP kinase ERK1	Sub-train	-1	0.904877	0.0951229	In
Cpd0108	CHEMBL1399	CC(C)(C#N)c1cc(Cn2cncn2)cc(c1)C(C)(C)C#N	IC50	=	Not Active	-1	MAP kinase ERK1	Sub-train	-1	0.983551	0.0164493	In
Cpd0117	CHEMBL393041	Fc1ccc2CN(C(=O)Nc2c1)c3csc(n3)c4ccncc4	IC50	>	10000	-1	MAP kinase ERK1	Test	1	0.437712	0.562288	In
Cpd0118	CHEMBL9419	CC(=O)Nc1cccc(O)c1	IC50	=	Not Active	-1	MAP kinase ERK1	Sub-train	-1	0.982779	0.017221	In
Cpd0120	CHEMBL14192	C(c1ccccc1)n2ccnc2	IC50	=	Not Active	-1	MAP kinase ERK1	Sub-train	-1	0.968981	0.0310187	In
Cpd0128	CHEMBL1220	CCS(=O)(=O)CCn1c(C)ncc1[N+](=O)[O-]	IC50	=	Not Active	-1	MAP kinase ERK1	Sub-train	-1	0.999839	0.000161361	In
Cpd0133	CHEMBL509	Cc1ccc(Cl)c(Nc2ccccc2C(=O)O)c1Cl	IC50	=	Not Active	-1	MAP kinase ERK1	Sub-train	-1	0.944097	0.055903	In
Cpd0138	CHEMBL469	OC(=O)C1CCn2c1ccc2C(=O)c3ccccc3	IC50	=	Not Active	-1	MAP kinase ERK1	Test	-1	0.933337	0.0666631	In
Cpd0144	CHEMBL1902981	CCc1ccc(cc1)C(=O)C(C)CN2CCCCC2	IC50	=	Not Active	-1	MAP kinase ERK1	Sub-train	-1	0.966151	0.0338487	In
Cpd0147	CHEMBL188921	COc1cc(OC)c(C(=O)CCCN2CCCC2)c(OC)c1	IC50	=	Not Active	-1	MAP kinase ERK1	Test	-1	0.991949	0.00805121	In
Cpd0148	CHEMBL679	CNC[C@H](O)c1ccc(O)c(O)c1	IC50	=	Not Active	-1	MAP kinase ERK1	Test	-1	0.998765	0.00123513	In
Cpd0150	CHEMBL980	COc1ccccc1OCC(O)CO	IC50	=	Not Active	-1	MAP kinase ERK1	Sub-train	-1	0.993268	0.00673167	In
Cpd0152	CHEMBL219916	Clc1ccc2N(C3CCN(CCCN4C(=O)Nc5ccccc45)CC3)C(=O)Nc2c1	IC50	=	Not Active	-1	MAP kinase ERK1	Test	-1	0.682765	0.317235	In
Cpd0154	CHEMBL1201207	C[C@H]1C[C@H]2[C@@H]3CCC4=CC(=O)C=C[C@]4(C)[C@@]3(F)[C@@H](O)C[C@]2(C)[C@@]1(O)C(=O)COP(=O)(O)O	IC50	=	Not Active	-1	MAP kinase ERK1	Sub-train	1	0.117071	0.882929	Outlier
Cpd0156	CHEMBL282575	C[C@]12CC[C@H]3[C@@H](CCc4cc(OC(=O)c5ccccc5)ccc34)[C@@H]1CC[C@@H]2O	IC50	=	Not Active	-1	MAP kinase ERK1	Sub-train	1	0.470384	0.529616	In
Cpd0168	CHEMBL1771	COC(=O)[C@@H](N1CCc2sccc2C1)c3ccccc3Cl	IC50	=	Not Active	-1	MAP kinase ERK1	Sub-train	-1	0.950044	0.0499563	In
Cpd0172	CHEMBL307145	Oc1cccc(O)c1O	IC50	=	Not Active	-1	MAP kinase ERK1	Test	-1	0.999118	0.000881929	In
Cpd0174	CHEMBL174	CC1(C)S[C@@H]2[C@H](NC(=O)[C@H](N)c3ccccc3)C(=O)N2[C@H]1C(=O)O	IC50	=	Not Active	-1	MAP kinase ERK1	Sub-train	-1	0.984092	0.015908	In
Cpd0176	CHEMBL36715	NC(=O)CN1CCCC1=O	IC50	=	Not Active	-1	MAP kinase ERK1	Sub-train	-1	0.998061	0.00193852	In
Cpd0180	CHEMBL1130	C[C@H]1O[C@H]([C@H](O)[C@@H]1O)N2C=C(F)C(=O)NC2=O	IC50	=	Not Active	-1	MAP kinase ERK1	Sub-train	-1	0.99636	0.00364046	In
Cpd0181	CHEMBL103	CC(=O)[C@H]1CC[C@H]2[C@@H]3CCC4=CC(=O)CC[C@]4(C)[C@H]3CC[C@]12C	IC50	=	Not Active	-1	MAP kinase ERK1	Test	-1	0.991403	0.00859714	In
Cpd0182	CHEMBL154111	OC(=O)c1ccccc1OC(=O)c2ccccc2O	IC50	=	Not Active	-1	MAP kinase ERK1	Sub-train	-1	0.871511	0.128489	In
Cpd0185	CHEMBL275742	CC(C)NC[C@@H](O)COc1cccc2ccccc12	IC50	=	Not Active	-1	MAP kinase ERK1	Sub-train	-1	0.983617	0.0163833	In
Cpd0187	CHEMBL242273	C=CCc1ccc2OCOc2c1	IC50	=	Not Active	-1	MAP kinase ERK1	Sub-train	-1	0.981723	0.018277	In
Cpd0188	CHEMBL1262	Clc1ccc(CO\N=C(/Cn2ccnc2)\c3ccc(Cl)cc3Cl)c(Cl)c1	IC50	=	Not Active	-1	MAP kinase ERK1	Sub-train	-1	0.592193	0.407807	In
Cpd0190	CHEMBL141343	Cc1c(C)c2OC(C)(CN3CCN(CC3)c4cc(nc(n4)N5CCCC5)N6CCCC6)CCc2c(C)c1O	IC50	=	4962	-1	MAP kinase ERK1	Sub-train	-1	0.62129	0.37871	In
Cpd0191	CHEMBL1231	CCN(CC)CC#CCOC(=O)C(O)(C1CCCCC1)c2ccccc2	IC50	=	Not Active	-1	MAP kinase ERK1	Sub-train	-1	0.851699	0.148301	In
Cpd0192	CHEMBL75880	C(C(C1CCCCC1)C2CCCCC2)C3CCCCN3	IC50	=	Not Active	-1	MAP kinase ERK1	Sub-train	-1	0.99753	0.00247002	In
Cpd0194	CHEMBL86304	Clc1ccc(cc1)C(=O)NCCN2CCOCC2	IC50	=	Not Active	-1	MAP kinase ERK1	Sub-train	-1	0.941377	0.0586231	In
Cpd0196	CHEMBL14053	OC(=O)C(Cl)(Cl)Cl	IC50	=	Not Active	-1	MAP kinase ERK1	Sub-train	-1	0.999917	8.28574e-05	In
Cpd0198	CHEMBL1321	CNNCc1ccc(cc1)C(=O)NC(C)C	IC50	=	Not Active	-1	MAP kinase ERK1	Sub-train	-1	0.732871	0.267129	In
Cpd0199	CHEMBL203266	COc1ccc(CN2CCNCC2)c(OC)c1OC	IC50	=	Not Active	-1	MAP kinase ERK1	Sub-train	-1	0.997706	0.00229351	In
Cpd0202	CHEMBL2103747	CCN1C[C@]2(COC)[C@H](O)C[C@@H](OC)[C@@]34[C@@H]5C[C@]6(O)[C@@H](OC)[C@H](O)[C@](OC(=O)C)([C@@H]([C@H](OC)[C@H]23)[C@@H]14)[C@H]5[C@H]6OC(=O)c7ccccc7	IC50	=	Not Active	-1	MAP kinase ERK1	Sub-train	-1	0.999908	9.16758e-05	In
Cpd0203	CHEMBL1062	CC(=O)[C@@]1(O)CC[C@H]2[C@@H]3CCC4=CC(=O)CC[C@]4(C)[C@H]3CC[C@]12C	IC50	=	3157	-1	MAP kinase ERK1	Sub-train	-1	0.989213	0.0107875	In
Cpd0207	CHEMBL600325	C[C@@H]1O[C@@H](O[C@H]2CC[C@]3(C)[C@H]4CC[C@]5(C)[C@H](CC[C@]5(O)[C@@H]4CCC3=C2)C6=COC(=O)C=C6)[C@H](O)[C@H](O)[C@H]1O	IC50	=	Not Active	-1	MAP kinase ERK1	Test	-1	0.897296	0.102704	In
Cpd0208	CHEMBL531	CCCN1C[C@H](CSC)C[C@H]2[C@H]1Cc3c[nH]c4cccc2c34	IC50	=	Not Active	-1	MAP kinase ERK1	Sub-train	-1	0.994929	0.00507101	In
Cpd0209	CHEMBL683	CC(C)(Oc1ccc(Cl)cc1)C(=O)O	IC50	=	Not Active	-1	MAP kinase ERK1	Sub-train	-1	0.972993	0.027007	In
Cpd0210	CHEMBL1201146	CC(=O)O[C@]1(CC[C@H]2[C@@H]3CCC4=CC(=O)CC[C@@H]4[C@H]3CC[C@]12C)C#C	IC50	=	Not Active	-1	MAP kinase ERK1	Test	-1	0.789427	0.210573	In
Cpd0215	CHEMBL1194	CCCNC(C)C(=O)Nc1ccccc1C	IC50	=	Not Active	-1	MAP kinase ERK1	Sub-train	-1	0.971624	0.0283759	In
Cpd0216	CHEMBL558551	O=C1CC[C@@H](N2C(=O)c3ccccc3C2=O)C(=O)N1	IC50	=	Not Active	-1	MAP kinase ERK1	Sub-train	-1	0.994268	0.00573217	In
Cpd0217	CHEMBL808	Clc1ccc(COC(Cn2ccnc2)c3ccc(Cl)cc3Cl)cc1	IC50	=	Not Active	-1	MAP kinase ERK1	Sub-train	-1	0.87938	0.12062	In
Cpd0218	CHEMBL1255901	C\C=C\1/[C@@H]2CC3=C(C=CC(=O)N3)[C@]1(N)CC(=C2)C	IC50	=	Not Active	-1	MAP kinase ERK1	Test	-1	0.995686	0.00431396	In
Cpd0219	CHEMBL563	CC(C(=O)O)c1ccc(c(F)c1)c2ccccc2	IC50	=	Not Active	-1	MAP kinase ERK1	Sub-train	-1	0.833762	0.166238	In
Cpd0220	CHEMBL415	CN(C)CCCN1c2ccccc2CCc3ccc(Cl)cc13	IC50	=	Not Active	-1	MAP kinase ERK1	Sub-train	-1	0.995434	0.00456587	In
Cpd0221	CHEMBL290916	CC1=NN(C(=O)C1)c2ccccc2	IC50	=	Not Active	-1	MAP kinase ERK1	Sub-train	-1	0.966928	0.0330723	In
Cpd0224	CHEMBL445206	COc1cc(\C=C/C)ccc1O	IC50	=	Not Active	-1	MAP kinase ERK1	Sub-train	-1	0.994515	0.00548517	In
Cpd0228	CHEMBL30	CN\C(=N\CCSCc1nc[nH]c1C)\NC#N	IC50	=	Not Active	-1	MAP kinase ERK1	Sub-train	-1	0.998217	0.0017825	In
Cpd0231	CHEMBL134	Clc1cccc(Cl)c1NC2=NCCN2	IC50	=	Not Active	-1	MAP kinase ERK1	Sub-train	-1	0.995983	0.00401702	In
Cpd0232	CHEMBL1200709	CCN(C(=O)\C=C\C)c1ccccc1C	IC50	=	Not Active	-1	MAP kinase ERK1	Sub-train	-1	0.982409	0.0175914	In
Cpd0233	CHEMBL1629810	CC(O)COC[C@@H]1OC[C@H]2O[C@@H]3[C@@H](O)[C@H](O)[C@@H](O[C@H]3COCC(C)O)O[C@@H]4[C@@H](O)[C@H](O)[C@@H](O[C@H]4COCC(C)O)O[C@@H]5[C@@H](O)[C@H](O)[C@@H](O[C@H]5COCC(C)O)O[C@@H]6[C@@H](O)[C@H](O)[C@@H](O[C@H]6COCC(C)O)O[C@@H]7[C@@H](O)[C@H](O)[C@@H](O[C@H]7COCC(C)O)O[C@@H]8[C@@H](O)[C@H](O)[C@@H](O[C@H]8COCC(C)O)O[C@@H]9[C@@H](O)[C@H](O)[C@@H](O[C@H]9COCC(C)O)O[C@@H]1[C@H]2O	IC50	=	Not Active	-1	MAP kinase ERK1	Sub-train	-1	0.982027	0.0179725	Outlier
Cpd0234	CHEMBL649	CC(C)(C)NCC(O)COc1cccc2C[C@@H](O)[C@@H](O)Cc12	IC50	=	Not Active	-1	MAP kinase ERK1	Sub-train	-1	0.992418	0.00758192	In
Cpd0235	CHEMBL413965	OC(=O)Cc1ccc(cc1)c2ccccc2	IC50	=	Not Active	-1	MAP kinase ERK1	Test	-1	0.808277	0.191723	In
Cpd0240	CHEMBL189	CC1=C(C=C(C#N)C(=O)N1)c2ccncc2	IC50	=	Not Active	-1	MAP kinase ERK1	Sub-train	-1	0.957001	0.0429992	In
Cpd0241	CHEMBL1598608	CN1C(=O)COc2c1cc(Cl)cc2C(=O)NC3CN4CCC3CC4	IC50	=	Not Active	-1	MAP kinase ERK1	Sub-train	-1	0.983608	0.0163915	In
Cpd0242	CHEMBL278172	CCOC(=O)c1ccc(N)cc1	IC50	=	Not Active	-1	MAP kinase ERK1	Sub-train	-1	0.932597	0.0674032	In
Cpd0244	CHEMBL513	ClCCNC(=O)N(CCCl)N=O	IC50	=	Not Active	-1	MAP kinase ERK1	Sub-train	-1	0.974034	0.0259662	In
Cpd0245	CHEMBL48449	C[C@@]12[C@H]3CC[C@H](O3)[C@]1(C)C(=O)OC2=O	IC50	=	Not Active	-1	MAP kinase ERK1	Sub-train	-1	0.99933	0.000670089	In
Cpd0249	CHEMBL1024	ClCCNP1(=O)OCCCN1CCCl	IC50	=	Not Active	-1	MAP kinase ERK1	Sub-train	-1	0.781359	0.218641	Outlier
Cpd0250	CHEMBL139835	CC(=O)O[C@@]1(CC[C@H]2[C@@H]3C=C(Cl)C4=CC(=O)[C@@H]5C[C@@H]5[C@]4(C)[C@H]3CC[C@]12C)C(=O)C	IC50	=	Not Active	-1	MAP kinase ERK1	Sub-train	-1	0.965876	0.034124	In
Cpd0251	CHEMBL313493	COS(=O)(=O)C	IC50	=	Not Active	-1	MAP kinase ERK1	Sub-train	-1	0.998721	0.00127903	Outlier
Cpd0252	CHEMBL3	CN1CCC[C@H]1c2cccnc2	IC50	=	Not Active	-1	MAP kinase ERK1	Sub-train	-1	0.969251	0.0307491	In
Cpd0253	CHEMBL1400945	CC(=O)[C@H]1[C@@H](C[C@H]2[C@@H]3CC=C4C[C@@H](O)CC[C@]4(C)[C@H]3CC[C@]12C)C#N	IC50	=	Not Active	-1	MAP kinase ERK1	Test	-1	0.982067	0.0179325	In
Cpd0254	CHEMBL580	OC1N=C(c2ccccc2Cl)c3cc(Cl)ccc3NC1=O	IC50	=	Not Active	-1	MAP kinase ERK1	Sub-train	-1	0.97182	0.0281801	In
Cpd0255	CHEMBL1712923	Nc1nc(N)nc(n1)c2cc(Cl)ccc2Cl.OC(=O)\C=C/C(=O)O	IC50	=	Not Active	-1	MAP kinase ERK1	Sub-train	-1	0.991812	0.00818846	In
Cpd0257	CHEMBL294199	COc1cc(CNC(=O)CCCC\C=C\C(C)C)ccc1O	IC50	=	Not Active	-1	MAP kinase ERK1	Sub-train	-1	0.898286	0.101714	In
Cpd0258	CHEMBL20	CC(=O)Nc1nnc(s1)S(=O)(=O)N	IC50	=	Not Active	-1	MAP kinase ERK1	Test	-1	0.999713	0.000287336	In
Cpd0259	CHEMBL1200396	Cl.CCCCN1CCCCC1C(=O)Nc2c(C)cccc2C	IC50	=	Not Active	-1	MAP kinase ERK1	Sub-train	-1	0.963666	0.0363344	In
Cpd0261	CHEMBL515914	CC(=O)OC[C@H]1O[C@H]([C@H](OC(=O)C)[C@@H]1OC(=O)C)N2N=CC(=O)NC2=O	IC50	=	Not Active	-1	MAP kinase ERK1	Sub-train	-1	0.992729	0.00727139	In
Cpd0262	CHEMBL338790	Nc1ccc2C(=O)NC(=O)c3cccc1c23	IC50	=	Not Active	-1	MAP kinase ERK1	Test	-1	0.992237	0.0077631	In
Cpd0268	CHEMBL1201220	CC(=O)Nc1c(I)c(NC(=O)C)c(I)c(C(=O)O)c1I	IC50	=	Not Active	-1	MAP kinase ERK1	Sub-train	-1	0.999985	1.4683e-05	Outlier
Cpd0271	CHEMBL415690	OC[C@H]1O[C@@H]2O[C@H]3[C@H](O)[C@@H](O)[C@H](O[C@@H]3CO)O[C@H]4[C@H](O)[C@@H](O)[C@H](O[C@@H]4CO)O[C@H]5[C@H](O)[C@@H](O)[C@H](O[C@@H]5CO)O[C@H]6[C@H](O)[C@@H](O)[C@H](O[C@@H]6CO)O[C@H]7[C@H](O)[C@@H](O)[C@H](O[C@@H]7CO)O[C@H]8[C@H](O)[C@@H](O)[C@H](O[C@@H]8CO)O[C@H]1[C@H](O)[C@H]2O	IC50	=	Not Active	-1	MAP kinase ERK1	Sub-train	-1	0.672616	0.327384	In
Cpd0273	CHEMBL70586	CN([C@H]1CC[C@@]2(CCCO2)C[C@@H]1N3CCCC3)C(=O)Cc4ccc(Cl)c(Cl)c4	IC50	=	Not Active	-1	MAP kinase ERK1	Test	-1	0.887672	0.112328	In
Cpd0275	CHEMBL757	C[C@]12CC[C@H]3[C@@H](CCC4=CC(=O)CC[C@H]34)[C@@H]1CC[C@@H]2O	IC50	=	Not Active	-1	MAP kinase ERK1	Sub-train	-1	0.985591	0.0144092	In
Cpd0276	CHEMBL506	COc1cc(NC(C)CCCN)c2ncccc2c1	IC50	=	Not Active	-1	MAP kinase ERK1	Sub-train	-1	0.927052	0.0729477	In
Cpd0278	CHEMBL566534	CO[C@H]1O[C@@H]2O[C@@]3(C)CC[C@H]4[C@H](C)CC[C@@H]([C@H]1C)[C@@]24OO3	IC50	=	Not Active	-1	MAP kinase ERK1	Sub-train	-1	0.999076	0.000923598	In
Cpd0279	CHEMBL500	CC(C)NCC(O)COc1cccc2[nH]ccc12	IC50	=	Not Active	-1	MAP kinase ERK1	Sub-train	-1	0.991364	0.00863578	In
Cpd0281	CHEMBL1909070	CC(C)(Oc1ccc(cc1)C2CCCc3ccccc23)C(=O)O	IC50	=	Not Active	-1	MAP kinase ERK1	Sub-train	-1	0.850775	0.149225	In
Cpd0293	CHEMBL1601669	CC(C)CCC[C@@H](C)[C@H]1CC[C@H]2\C(=C\C=C/3\C[C@@H](O)C[C@H](O)C3=C)\CCC[C@]12C	IC50	=	Not Active	-1	MAP kinase ERK1	Sub-train	-1	0.990644	0.0093561	In
Cpd0294	CHEMBL24441	CNCCc1ccccn1	IC50	=	Not Active	-1	MAP kinase ERK1	Sub-train	-1	0.976257	0.0237434	In
Cpd0295	CHEMBL1909051	FC(F)(F)c1ccccc1C(=O)N2CCC(Cc3ccccc3)CC2	IC50	=	Not Active	-1	MAP kinase ERK1	Sub-train	-1	0.842628	0.157372	In
Cpd0303	CHEMBL1237	NCCCC[C@H](N[C@@H](CCc1ccccc1)C(=O)O)C(=O)N2CCC[C@H]2C(=O)O	IC50	=	Not Active	-1	MAP kinase ERK1	Sub-train	-1	0.978447	0.021553	In
Cpd0304	CHEMBL117405	CC(C)NC[C@H](O)COc1cccc2[nH]ccc12	IC50	=	Not Active	-1	MAP kinase ERK1	Test	-1	0.991364	0.00863578	In
Cpd0306	CHEMBL2420911	C1CNCC2(C1)CCN(CC2)c3ncnc4[nH]cnc34	IC50	=	37000	-1	MAP kinase ERK1	Test	-1	0.937251	0.0627493	In
Cpd0307	CHEMBL871	CC(O)(P(=O)(O)O)P(=O)(O)O	IC50	=	Not Active	-1	MAP kinase ERK1	Sub-train	-1	0.971566	0.0284341	Outlier
Cpd0309	CHEMBL118	Cc1ccc(cc1)c2cc(nn2c3ccc(cc3)S(=O)(=O)N)C(F)(F)F	IC50	=	Not Active	-1	MAP kinase ERK1	Sub-train	1	0.365294	0.634706	In
Cpd0311	CHEMBL588119	CCCCCCCCN[C@H](C)[C@@H](O)c1ccc(SC(C)C)cc1	IC50	=	Not Active	-1	MAP kinase ERK1	Sub-train	-1	0.994872	0.00512765	In
Cpd0312	CHEMBL1109	Nc1ccc(cc1)S(=O)(=O)Nc2ccnn2c3ccccc3	IC50	=	Not Active	-1	MAP kinase ERK1	Test	-1	0.953607	0.0463935	In
Cpd0314	CHEMBL62193	COc1cc(NS(=O)(=O)c2ccc(N)cc2)nc(OC)n1	IC50	=	Not Active	-1	MAP kinase ERK1	Sub-train	-1	0.966247	0.0337532	In
Cpd0317	CHEMBL1200748	O.C[C@@](Cc1ccc(O)c(O)c1)(NN)C(=O)O	IC50	=	Not Active	-1	MAP kinase ERK1	Sub-train	1	0.34724	0.65276	In
Cpd0319	CHEMBL1237044	COc1cccc(c1)C2(O)CCCCC2CN(C)C	IC50	=	Not Active	-1	MAP kinase ERK1	Sub-train	-1	0.998285	0.00171466	In
Cpd0320	CHEMBL1123	CCN(CC)CCOC(=O)C1(CCCCC1)C2CCCCC2	IC50	=	Not Active	-1	MAP kinase ERK1	Sub-train	-1	0.997122	0.00287759	In
Cpd0321	CHEMBL809	CN[C@H]1CC[C@@H](c2ccc(Cl)c(Cl)c2)c3ccccc13	IC50	=	Not Active	-1	MAP kinase ERK1	Sub-train	-1	0.983176	0.016824	In
Cpd0323	CHEMBL1148	CC(C)NC(=O)NS(=O)(=O)c1cnccc1Nc2cccc(C)c2	IC50	=	Not Active	-1	MAP kinase ERK1	Sub-train	-1	0.994554	0.00544578	In
Cpd0327	CHEMBL84158	CCN(CC)CCNC(=O)c1cc(ccc1OC)S(=O)(=O)C	IC50	=	Not Active	-1	MAP kinase ERK1	Sub-train	-1	0.899668	0.100332	In
Cpd0330	CHEMBL1200558	CC[C@H](C)[C@H](N)C1=N[C@@H](CS1)C(=O)N[C@@H](CC(C)C)C(=O)N[C@H](CCC(=O)O)C(=O)N[C@@H]([C@@H](C)CC)C(=O)N[C@H]2CCCCNC(=O)[C@H](CC(=O)N)NC(=O)[C@@H](CC(=O)O)NC(=O)[C@H](Cc3cnc[nH]3)NC(=O)[C@@H](Cc4ccccc4)NC(=O)[C@@H](NC(=O)[C@@H](CCCN)NC2=O)[C@@H](C)CC	IC50	=	Not Active	-1	MAP kinase ERK1	Sub-train	-1	0.990797	0.00920349	Outlier
Cpd0333	CHEMBL1515611	CC(C)C(Br)C(=O)NC(=O)N	IC50	=	Not Active	-1	MAP kinase ERK1	Sub-train	-1	0.999659	0.000341002	In
Cpd0336	CHEMBL1201024	[Br-].C[N+]1(C)[C@H]2C[C@@H](C[C@H]1[C@H]3O[C@@H]23)OC(=O)[C@H](CO)c4ccccc4	IC50	=	Not Active	-1	MAP kinase ERK1	Sub-train	-1	0.968226	0.0317745	In
Cpd0337	CHEMBL2107797	CC[C@]12CC[C@H]3[C@@H](CCC4=CC(=O)CC[C@H]34)[C@@H]1CCC2(O)C#C	IC50	=	Not Active	-1	MAP kinase ERK1	Sub-train	-1	0.942817	0.0571826	In
Cpd0338	CHEMBL427216	Cc1ccc(cc1)S(=O)(=O)NC(=O)NN2CC3CCCC3C2	IC50	=	Not Active	-1	MAP kinase ERK1	Sub-train	-1	0.998075	0.00192505	In
Cpd0339	CHEMBL1046	NCCCCCC(=O)O	IC50	=	Not Active	-1	MAP kinase ERK1	Sub-train	-1	0.996254	0.0037462	In
Cpd0340	CHEMBL439	Nc1ccc(cc1)S(=O)(=O)Nc2ncccn2	IC50	=	Not Active	-1	MAP kinase ERK1	Sub-train	-1	0.970761	0.0292391	In
Cpd0341	CHEMBL1168	CCOC(=O)[C@H](CCc1ccccc1)N[C@@H](C)C(=O)N2[C@H]3CCC[C@H]3C[C@H]2C(=O)O	IC50	=	Not Active	-1	MAP kinase ERK1	Sub-train	-1	0.970699	0.0293014	In
Cpd0343	CHEMBL452861	CC(C)NC[C@H](O)COc1cccc2ccccc12	IC50	=	Not Active	-1	MAP kinase ERK1	Sub-train	-1	0.983617	0.0163833	In
Cpd0344	CHEMBL1908355	NC(=O)N1C(=O)\C(=C(/O)\c2cccs2)\c3cc(Cl)ccc13	IC50	=	Not Active	-1	MAP kinase ERK1	Test	-1	0.979294	0.0207062	In
Cpd0345	CHEMBL1306	CC(C)N1CCN(CC1)c2ccc(OC[C@H]3CO[C@@](Cn4cncn4)(O3)c5ccc(Cl)cc5Cl)cc2	IC50	=	Not Active	-1	MAP kinase ERK1	Test	-1	0.82248	0.17752	In
Cpd0347	CHEMBL421	OC(=O)c1cc(ccc1O)\N=N\c2ccc(cc2)S(=O)(=O)Nc3ccccn3	IC50	=	Not Active	-1	MAP kinase ERK1	Sub-train	1	0.475699	0.524301	In
Cpd0349	CHEMBL783	CC(C)[C@@H]1CC[C@H](CC1)C(=O)N[C@H](Cc2ccccc2)C(=O)O	IC50	=	Not Active	-1	MAP kinase ERK1	Sub-train	-1	0.904622	0.0953785	In
Cpd0350	CHEMBL983	[Cl-].[Cl-].C[N+](C)(C)CCOC(=O)CCC(=O)OCC[N+](C)(C)C	IC50	=	Not Active	-1	MAP kinase ERK1	Sub-train	-1	0.99989	0.000110279	In
Cpd0354	CHEMBL695	CN1C(=O)OC(C)(C)C1=O	IC50	=	Not Active	-1	MAP kinase ERK1	Sub-train	-1	0.986603	0.0133967	In
Cpd0355	CHEMBL643	CC(CN1c2ccccc2Sc3ccccc13)N(C)C	IC50	=	Not Active	-1	MAP kinase ERK1	Test	-1	0.997516	0.00248424	In
Cpd0356	CHEMBL748	[Cl-].C[n+]1ccccc1\C=N\O	IC50	=	Not Active	-1	MAP kinase ERK1	Sub-train	-1	0.997321	0.00267914	In
Cpd0357	CHEMBL1261	OC(=O)CC(O)(CC(=O)O)C(=O)O	IC50	=	Not Active	-1	MAP kinase ERK1	Sub-train	-1	0.998866	0.00113378	In
Cpd0358	CHEMBL3577565	COc1cccc(c1)N2C(=O)\C(=C\c3ccc(OCC(=O)Nc4cccc(C)c4)cc3)\N=C2c5ccccc5	IC50	=	20	1	MAP kinase ERK1	Sub-train	1	0.41287	0.58713	In
Cpd0359	CHEMBL44618	ClC(Cl)Cl	IC50	=	Not Active	-1	MAP kinase ERK1	Sub-train	-1	0.999994	6.39071e-06	In
Cpd0360	CHEMBL569	CCN(CC)CCOC(=O)c1ccc(N)cc1	IC50	=	Not Active	-1	MAP kinase ERK1	Sub-train	-1	0.856561	0.143439	In
Cpd0361	CHEMBL1956070	CN1CCN(CC1)c2ccc(Nc3nc(N)c(s3)C(=O)c4ccc5OCCOc5c4)cc2	IC50	>	100000000	-1	MAP kinase ERK1	Sub-train	-1	0.96191	0.0380897	In
Cpd0365	CHEMBL998	CCOC(=O)N1CCC(=C2c3ccc(Cl)cc3CCc4cccnc24)CC1	IC50	=	Not Active	-1	MAP kinase ERK1	Sub-train	1	0.395572	0.604428	In
Cpd0366	CHEMBL156455	ClC(=C)Cl	IC50	=	Not Active	-1	MAP kinase ERK1	Test	-1	0.99991	8.98326e-05	In
Cpd0367	CHEMBL13378	Cc1onc(O)c1CC(N)C(=O)O	IC50	=	Not Active	-1	MAP kinase ERK1	Sub-train	-1	0.952868	0.0471321	In
Cpd0368	CHEMBL441687	CC1(C)[C@H](CC[C@@]2(C)[C@H]1CC[C@]3(C)[C@@H]2C(=O)C=C4[C@@H]5C[C@](C)(CC[C@]5(C)CC[C@@]34C)C(=O)O)O[C@H]6O[C@@H]([C@@H](O)[C@H](O)[C@H]6O[C@@H]7O[C@@H]([C@@H](O)[C@H](O)[C@H]7O)C(=O)O)C(=O)O	IC50	=	Not Active	-1	MAP kinase ERK1	Test	-1	0.998269	0.00173128	In
Cpd0369	CHEMBL959	CC(N)C12CC3CC(CC(C3)C1)C2	IC50	=	Not Active	-1	MAP kinase ERK1	Sub-train	-1	0.999436	0.000563892	In
Cpd0370	CHEMBL1956069	COc1cccc(c1)C(=O)c2sc(Nc3ccc(cc3)N4CCN(CC4)C(C)C)nc2N	IC50	>	100000000	-1	MAP kinase ERK1	Sub-train	-1	0.954287	0.0457133	In
Cpd0371	CHEMBL511	COc1ccc(CN(CCN(C)C)c2ccccn2)cc1	IC50	=	Not Active	-1	MAP kinase ERK1	Sub-train	-1	0.904593	0.0954075	In
Cpd0372	CHEMBL1201139	CC(=O)O[C@@]1(CC[C@H]2[C@@H]3C=C(C)C4=CC(=O)CC[C@]4(C)[C@H]3CC[C@]12C)C(=O)C	IC50	=	Not Active	-1	MAP kinase ERK1	Sub-train	-1	0.939783	0.0602171	In
Cpd0373	CHEMBL253376	CN(Cc1cc(Br)cc(Br)c1N)C2CCCCC2	IC50	=	Not Active	-1	MAP kinase ERK1	Sub-train	-1	0.994604	0.00539575	In
Cpd0374	CHEMBL3215298	CC[C@H](C)[C@H]1O[C@@]2(C[C@@H]3C[C@@H](C\C=C(/C)\[C@@H](O[C@H]4C[C@H](OC)[C@@H](O[C@H]5C[C@H](OC)[C@@H](O)[C@H](C)O5)[C@H](C)O4)[C@@H](C)\C=C\C=C\6/CO[C@@H]7[C@H](O)C(=C[C@@H](C(=O)O3)[C@]67O)C)O2)C=C[C@@H]1C.CO[C@H]8C[C@H](O[C@H]9[C@H](C)O[C@H](C[C@@H]9OC)O[C@H]%10[C@@H](C)\C=C\C=C\%11/CO[C@@H]%12[C@H](O)C(=C[C@@H](C(=O)O[C@H]%13C[C@@H](C\C=C\%10/C)O[C@@]%14(C%13)O[C@H](C(C)C)[C@@H](C)C=C%14)[C…	IC50	=	Not Active	-1	MAP kinase ERK1	Test	-1	0.931285	0.0687155	In
Cpd0377	CHEMBL402794	CCCC[C@@H](CC)COC(=O)c1ccccc1C(=O)OC[C@@H](CC)CCCC	IC50	=	Not Active	-1	MAP kinase ERK1	Sub-train	-1	0.957235	0.042765	In
Cpd0378	CHEMBL229383	C[C@@H]1OC(=O)C[C@H](O)C[C@H](O)C[C@H](O)CC[C@@H](O)[C@H](O)C[C@]2(O)C[C@H](O)[C@H]([C@H](C[C@@H](O[C@H]3O[C@@H](C)[C@H](O)[C@@H](N)[C@H]3O)\C=C\C=C\C=C\C=C\CC\C=C\C=C\[C@H](C)[C@@H](O)[C@H]1C)O2)C(=O)O	IC50	=	Not Active	-1	MAP kinase ERK1	Test	-1	0.576023	0.423977	In
Cpd0383	CHEMBL1929238	CN(C)CCN1CCN(CCC1=O)C(=O)c2cc(sc2NC(=O)Nc3cccc(Cl)c3Cl)C(C)(C)C	IC50	>	30000	-1	MAP kinase ERK1	Sub-train	-1	0.998891	0.00110875	In
Cpd0384	CHEMBL1221512	CC[C@H](C)[C@@H](CO[C@@H](Cc1ccccc1)C(=O)N[C@@H](CCS(=O)(=O)C)C(=O)OC(C)C)NC[C@@H](N)CS	IC50	=	Not Active	-1	MAP kinase ERK1	Sub-train	-1	0.757553	0.242447	In
Cpd0385	CHEMBL1630579	CCN(CC)CCOCCC1=CCC2CC1C2(C)C	IC50	=	Not Active	-1	MAP kinase ERK1	Sub-train	-1	0.998223	0.00177722	In
Cpd0386	CHEMBL462547	CCOC(=O)N	IC50	=	Not Active	-1	MAP kinase ERK1	Sub-train	-1	0.999459	0.000540783	Outlier
Cpd0387	CHEMBL76904	Oc1ccc(C=C(C#N)C#N)cc1O	IC50	=	Not Active	-1	MAP kinase ERK1	Sub-train	-1	0.996662	0.00333801	In
Cpd0388	CHEMBL153479	Nc1c(Br)cc(Br)cc1CN[C@@H]2CC[C@@H](O)CC2	IC50	=	Not Active	-1	MAP kinase ERK1	Sub-train	-1	0.992802	0.00719779	In
Cpd0389	CHEMBL1521	CCN(C(=O)C)c1cccc(c1)c2ccnc3c(cnn23)C#N	IC50	=	Not Active	-1	MAP kinase ERK1	Test	-1	0.911594	0.0884064	In
Cpd0390	CHEMBL159	CC[C@]1(O)C[C@@H]2CN(CCc3c([nH]c4ccccc34)[C@@](C2)(C(=O)OC)c5cc6c(cc5OC)N(C)[C@H]7[C@](O)([C@H](OC(=O)C)[C@]8(CC)C=CCN9CC[C@]67[C@H]89)C(=O)OC)C1	IC50	=	Not Active	-1	MAP kinase ERK1	Sub-train	-1	0.99677	0.00323038	Outlier
Cpd0391	CHEMBL1566956	COc1cc(cc(OC)c1OC)C(=O)NC2CCCNC2	IC50	=	Not Active	-1	MAP kinase ERK1	Test	-1	0.969605	0.0303947	In
Cpd0393	CHEMBL603	COc1cc(ccc1Cc2cn(C)c3ccc(NC(=O)OC4CCCC4)cc23)C(=O)NS(=O)(=O)c5ccccc5C	IC50	=	4376	-1	MAP kinase ERK1	Sub-train	1	0.428259	0.571741	In
Cpd0394	CHEMBL395110	CN1CCCC(CN2c3ccccc3Sc4ccccc24)C1	IC50	=	Not Active	-1	MAP kinase ERK1	Sub-train	-1	0.996204	0.0037965	In
Cpd0395	CHEMBL642	CCCC(=O)Nc1ccc(OCC(O)CNC(C)C)c(c1)C(=O)C	IC50	=	Not Active	-1	MAP kinase ERK1	Sub-train	-1	0.964278	0.035722	In
Cpd0396	CHEMBL189171	COc1ccc2c(c1)c(CC(=O)OCC(=O)O)c(C)n2C(=O)c3ccc(Cl)cc3	IC50	=	Not Active	-1	MAP kinase ERK1	Sub-train	-1	0.918357	0.0816427	In
Cpd0397	CHEMBL37858	OC(=O)C1=CN(c2ccc(F)cc2)c3cc(N4CCNCC4)c(F)cc3C1=O	IC50	=	Not Active	-1	MAP kinase ERK1	Test	-1	0.984237	0.0157633	In
Cpd0398	CHEMBL557555	CC(C)(Oc1ccc(cc1)C2CC2(Cl)Cl)C(=O)O	IC50	=	Not Active	-1	MAP kinase ERK1	Sub-train	-1	0.953686	0.0463141	In
Cpd0401	CHEMBL1909050	Cc1ccccc1C(=O)N2CCC(Cc3ccccc3)CC2	IC50	=	Not Active	-1	MAP kinase ERK1	Test	-1	0.694236	0.305764	In
Cpd0402	CHEMBL1909049	COc1ccccc1C(=O)N2CCC(Cc3ccccc3)CC2	IC50	=	Not Active	-1	MAP kinase ERK1	Sub-train	-1	0.849058	0.150942	In
Cpd0403	CHEMBL1200391	NC(CO)(CO)CO	IC50	=	Not Active	-1	MAP kinase ERK1	Sub-train	-1	0.999931	6.9213e-05	In
Cpd0404	CHEMBL918	NC(=O)NC(=O)Cc1ccccc1	IC50	=	Not Active	-1	MAP kinase ERK1	Sub-train	-1	0.976147	0.023853	In
Cpd0407	CHEMBL850	C[C@@H]1CN(C[C@H](C)N1)c2c(F)c(N)c3C(=O)C(=CN(C4CC4)c3c2F)C(=O)O	IC50	=	Not Active	-1	MAP kinase ERK1	Sub-train	-1	0.997853	0.00214735	In
Cpd0408	CHEMBL1113	Clc1ccc2Oc3ccccc3N=C(N4CCNCC4)c2c1	IC50	=	Not Active	-1	MAP kinase ERK1	Sub-train	-1	0.987726	0.0122739	In
Cpd0409	CHEMBL34431	CN(C1CCCCC1)C(=O)CCCOc2ccc3nc(O)ccc3c2	IC50	=	Not Active	-1	MAP kinase ERK1	Sub-train	-1	0.667909	0.332091	In
Cpd0410	CHEMBL56564	CN1[C@@H]2CC[C@H]1C[C@H](C2)OC(=O)c3c[nH]c4ccccc34	IC50	=	Not Active	-1	MAP kinase ERK1	Sub-train	-1	0.905141	0.0948594	In
Cpd0411	CHEMBL13	COCCc1ccc(OCC(O)CNC(C)C)cc1	IC50	=	Not Active	-1	MAP kinase ERK1	Test	-1	0.969611	0.0303887	In
Cpd0412	CHEMBL3183075	CNC(=C[N+](=O)[O-])NCCSCc1csc(CN(C)C)n1	IC50	=	Not Active	-1	MAP kinase ERK1	Sub-train	-1	0.999809	0.000190843	In
Cpd0413	CHEMBL2220442	CC(C)n1c(\C=C\C(O)CC(O)CC(=O)O)c(c2ccc(F)cc2)c3ccccc13	IC50	=	Not Active	-1	MAP kinase ERK1	Sub-train	-1	0.986268	0.0137319	In
Cpd0414	CHEMBL2220427	CC[C@H]1OC(=O)[C@H](C)[C@@H](O[C@H]2C[C@@](C)(OC)[C@@H](O)[C@H](C)O2)[C@H](C)[C@@H](O[C@@H]3O[C@H](C)C[C@@H]([C@H]3OC(=O)CC)N(C)C)[C@](C)(O)C[C@@H](C)C(=O)[C@H](C)[C@@H](O)[C@]1(C)O	IC50	=	Not Active	-1	MAP kinase ERK1	Test	-1	0.998496	0.00150402	In
Cpd0415	CHEMBL1651906	CN(N=O)C(=O)N[C@H]1C(O)O[C@H](CO)[C@@H](O)[C@@H]1O	IC50	=	Not Active	-1	MAP kinase ERK1	Sub-train	-1	0.898311	0.101689	In
Cpd0416	CHEMBL471	CC(C)NCC(O)c1ccc(NS(=O)(=O)C)cc1	IC50	=	Not Active	-1	MAP kinase ERK1	Sub-train	-1	0.849995	0.150005	In
Cpd0417	CHEMBL2079587	C[C@]1(O)CC[C@H]2[C@@H]3CC[C@H]4Cc5n[nH]cc5C[C@]4(C)[C@H]3CC[C@]12C	IC50	=	Not Active	-1	MAP kinase ERK1	Sub-train	-1	0.950543	0.0494566	In
Cpd0418	CHEMBL196	OC[C@H](O)[C@H]1OC(=O)C(=C1O)O	IC50	=	Not Active	-1	MAP kinase ERK1	Test	-1	0.998082	0.00191795	In
Cpd0419	CHEMBL1466	OC1=C(CC2=C(O)c3ccccc3OC2=O)C(=O)Oc4ccccc14	IC50	=	Not Active	-1	MAP kinase ERK1	Sub-train	-1	0.904092	0.0959077	In
Cpd0420	CHEMBL1159650	CCC(=O)O[C@@]1([C@@H](C)C[C@H]2[C@@H]3CCC4=CC(=O)C=C[C@]4(C)[C@@]3(F)[C@@H](O)C[C@]12C)C(=O)CCl	IC50	=	Not Active	-1	MAP kinase ERK1	Test	-1	0.985371	0.0146293	In
Cpd0421	CHEMBL1393	CC(=O)S[C@@H]1CC2=CC(=O)CC[C@]2(C)[C@H]3CC[C@@]4(C)[C@@H](CC[C@@]45CCC(=O)O5)[C@H]13	IC50	=	Not Active	-1	MAP kinase ERK1	Test	-1	0.974338	0.025662	In
Cpd0422	CHEMBL1513	CCCCC1=NC2(CCCC2)C(=O)N1Cc3ccc(cc3)c4ccccc4c5nn[nH]n5	IC50	=	Not Active	-1	MAP kinase ERK1	Test	1	0.0541809	0.945819	In
Cpd0425	CHEMBL1201010	CC(=O)OCC(=O)[C@@]1(O)CC[C@H]2[C@@H]3CCC4=CC(=O)CC[C@]4(C)[C@@]3(F)[C@@H](O)C[C@]12C	IC50	=	Not Active	-1	MAP kinase ERK1	Sub-train	-1	0.968859	0.0311407	In
Cpd0427	CHEMBL457	Cc1ccc(C)c(OCCCC(C)(C)C(=O)O)c1	IC50	=	Not Active	-1	MAP kinase ERK1	Test	-1	0.98465	0.0153498	In
Cpd0428	CHEMBL407030	OC[C@H]1O[C@@H]2O[C@H]3[C@H](O)[C@@H](O)[C@H](O[C@@H]3CO)O[C@H]4[C@H](O)[C@@H](O)[C@H](O[C@@H]4CO)O[C@H]5[C@H](O)[C@@H](O)C(O[C@@H]5CO)OC6[C@H](O)[C@@H](O)C(O[C@@H]6CO)C7[C@H](O)[C@@H](O)C(O[C@@H]7CO)O[C@H]8[C@H](O)[C@@H](O)[C@H](O[C@@H]8CO)O[C@H]9[C@H](O)[C@@H](O)[C@H](O[C@@H]9CO)O[C@H]1[C@H](O)[C@H]2O	IC50	=	Not Active	-1	MAP kinase ERK1	Sub-train	-1	0.833298	0.166702	In
Cpd0429	CHEMBL44884	CC[C@@H](CO)NCCN[C@@H](CC)CO	IC50	=	Not Active	-1	MAP kinase ERK1	Sub-train	-1	0.998283	0.00171667	In
Cpd0431	CHEMBL1390	C[C@H]1C[C@@H]2[C@H](CC[C@@]3(C)[C@H]2CC[C@]3(O)C(=O)C)[C@@]4(C)CCC(=O)C=C14	IC50	=	Not Active	-1	MAP kinase ERK1	Test	-1	0.992403	0.0075971	In
Cpd0432	CHEMBL1751	C[C@H]1O[C@H](C[C@H](O)[C@@H]1O)O[C@H]2[C@@H](O)C[C@H](O[C@H]3[C@@H](O)C[C@H](O[C@H]4CC[C@@]5(C)[C@H](CC[C@@H]6[C@@H]5C[C@@H](O)[C@]7(C)[C@H](CC[C@]67O)C8=CC(=O)OC8)C4)O[C@@H]3C)O[C@@H]2C	IC50	=	Not Active	-1	MAP kinase ERK1	Sub-train	-1	0.893492	0.106508	In
Cpd0433	CHEMBL459	C[C@](N)(Cc1ccc(O)c(O)c1)C(=O)O	IC50	=	Not Active	-1	MAP kinase ERK1	Sub-train	-1	0.976543	0.0234567	In
Cpd0434	CHEMBL564	CN(C)CCCN1c2ccccc2Sc3ccccc13	IC50	=	Not Active	-1	MAP kinase ERK1	Sub-train	-1	0.997769	0.00223112	In
Cpd0436	CHEMBL460291	CCOC(=O)C1=C(C)NC(=C(C1c2ccccc2\C=C\C(=O)OC(C)(C)C)C(=O)OCC)C	IC50	=	Not Active	-1	MAP kinase ERK1	Sub-train	-1	0.994451	0.0055488	In
Cpd0437	CHEMBL502896	Cl.NC[C@@H]1CC[C@H](CC1)C(=O)Oc2ccc(CCC(=O)O)cc2	IC50	=	Not Active	-1	MAP kinase ERK1	Sub-train	-1	0.856954	0.143046	In
Cpd0438	CHEMBL1479	C[C@]12Cc3cnoc3C=C1CC[C@@H]4[C@@H]2CC[C@@]5(C)[C@H]4CC[C@@]5(O)C#C	IC50	=	Not Active	-1	MAP kinase ERK1	Sub-train	-1	0.878359	0.121641	In
Cpd0439	CHEMBL976	O=C(C1CCCCC1)N2CC3N(CCc4ccccc34)C(=O)C2	IC50	=	Not Active	-1	MAP kinase ERK1	Sub-train	-1	0.982155	0.0178448	In
Cpd0442	CHEMBL83	CC\C(=C(/c1ccccc1)\c2ccc(OCCN(C)C)cc2)\c3ccccc3	IC50	=	Not Active	-1	MAP kinase ERK1	Sub-train	-1	0.988599	0.0114012	In
Cpd0444	CHEMBL1016	CCOc1nc2cccc(C(=O)O)c2n1Cc3ccc(cc3)c4ccccc4c5nnn[nH]5	IC50	=	Not Active	-1	MAP kinase ERK1	Test	1	0.0099411	0.990059	In
Cpd0445	CHEMBL1727	CC1=C(N2[C@H](SC1)[C@H](NC(=O)[C@H](N)c3ccccc3)C2=O)C(=O)O	IC50	=	Not Active	-1	MAP kinase ERK1	Test	-1	0.97278	0.0272196	In
Cpd0446	CHEMBL16073	CCOc1ccc(NC(=O)C)cc1	IC50	=	Not Active	-1	MAP kinase ERK1	Sub-train	-1	0.96753	0.0324704	In
Cpd0447	CHEMBL666	OC(=O)P(=O)(O)O	IC50	=	Not Active	-1	MAP kinase ERK1	Sub-train	-1	0.725238	0.274762	Outlier
Cpd0448	CHEMBL1909065	CO[C@H]1C[C@@H](O[C@H]2C[C@@H](O[C@H]2[C@]3(C)CC[C@@H](O3)[C@]4(C)CC[C@]5(C[C@H](O)[C@@H](C)[C@H](O5)[C@@H](C)[C@@H]6O[C@](O)(CC(=O)O)[C@@H](C)[C@H](OC)[C@H]6OC)O4)[C@H]7O[C@](C)(O)[C@H](C)C[C@@H]7C)O[C@@H](C)[C@@H]1OC	IC50	=	Not Active	-1	MAP kinase ERK1	Test	-1	0.99633	0.0036703	Outside-AD
Cpd0449	CHEMBL657	CN(C)CCOC(c1ccccc1)c2ccccc2	IC50	=	Not Active	-1	MAP kinase ERK1	Test	-1	0.969207	0.0307928	In
Cpd0450	CHEMBL1201353	CN(C)CC[C@@H](c1ccc(Cl)cc1)c2ccccn2	IC50	=	Not Active	-1	MAP kinase ERK1	Sub-train	-1	0.898516	0.101484	In
Cpd0451	CHEMBL15511	CCN1CCN(CC1)c2cc3N(C=C(C(=O)O)C(=O)c3cc2F)C4CC4	IC50	=	Not Active	-1	MAP kinase ERK1	Sub-train	-1	0.993847	0.00615274	In
Cpd0452	CHEMBL31184	c1ccc2c(c1)cc3ccc4cccc5ccc2c3c45	IC50	=	Not Active	-1	MAP kinase ERK1	Test	-1	0.982618	0.0173823	In
Cpd0454	CHEMBL1477	COCc1c(nc(C(C)C)c(\C=C\[C@@H](O)C[C@@H](O)CC(=O)O)c1c2ccc(F)cc2)C(C)C	IC50	=	Not Active	-1	MAP kinase ERK1	Sub-train	-1	0.980971	0.0190291	In
Cpd0455	CHEMBL1200585	C[C@]1(O)CC[C@H]2[C@@H]3CC[C@H]4CC(=O)\C(=C/O)\C[C@]4(C)[C@H]3CC[C@]12C	IC50	=	Not Active	-1	MAP kinase ERK1	Test	-1	0.994867	0.00513317	In
Cpd0458	CHEMBL25719	CC(=CCC\C(=C\CO)\C)C	IC50	=	Not Active	-1	MAP kinase ERK1	Sub-train	-1	0.996231	0.00376885	In
Cpd0459	CHEMBL40	CCC1(C(=O)NC(=O)NC1=O)c2ccccc2	IC50	=	Not Active	-1	MAP kinase ERK1	Sub-train	-1	0.996686	0.00331418	In
Cpd0460	CHEMBL42710	COc1cc(CC=C)ccc1O	IC50	=	Not Active	-1	MAP kinase ERK1	Sub-train	-1	0.992158	0.0078421	In
Cpd0462	CHEMBL43882	ClCC(Cl)Cl	IC50	=	Not Active	-1	MAP kinase ERK1	Sub-train	-1	0.999859	0.000140776	In
Cpd0463	CHEMBL2107687	[Br-].CCC(C)C(C(=O)OCC[N+](C)(CC)CC)c1ccccc1	IC50	=	Not Active	-1	MAP kinase ERK1	Sub-train	-1	0.993202	0.00679771	In
Cpd0464	CHEMBL18701	CCCCOc1cc(CC2CNC(=O)N2)ccc1OC	IC50	=	Not Active	-1	MAP kinase ERK1	Sub-train	-1	0.900093	0.099907	In
Cpd0465	CHEMBL412873	C1CCN2C[C@H]3C[C@H](CN4CCCC[C@@H]34)[C@H]2C1	IC50	=	Not Active	-1	MAP kinase ERK1	Test	-1	0.998543	0.00145692	In
Cpd0466	CHEMBL1231530	OC(=O)CCNC(=O)c1ccccc1	IC50	=	Not Active	-1	MAP kinase ERK1	Sub-train	-1	0.994966	0.00503375	In
Cpd0467	CHEMBL1201012	CC1(C)O[C@@H]2C[C@H]3[C@@H]4C[C@H](F)C5=CC(=O)CC[C@]5(C)[C@H]4[C@@H](O)C[C@]3(C)[C@@]2(O1)C(=O)CO	IC50	=	Not Active	-1	MAP kinase ERK1	Sub-train	-1	0.995161	0.00483902	In
Cpd0468	CHEMBL498	CCCNC(=O)NS(=O)(=O)c1ccc(Cl)cc1	IC50	=	Not Active	-1	MAP kinase ERK1	Test	-1	0.997107	0.00289255	In
Cpd0469	CHEMBL553025	CCC1=C[C@@H]2CN(C1)Cc3c([nH]c4ccccc34)[C@@](C2)(C(=O)OC)c5cc6c(cc5OC)N(C)[C@H]7[C@](O)([C@H](OC(=O)C)[C@]8(CC)C=CCN9CC[C@]67[C@H]89)C(=O)OC	IC50	=	Not Active	-1	MAP kinase ERK1	Test	-1	0.996453	0.00354687	In
Cpd0470	CHEMBL438	Cc1ccnc(NS(=O)(=O)c2ccc(N)cc2)n1	IC50	=	Not Active	-1	MAP kinase ERK1	Sub-train	-1	0.965043	0.034957	In
Cpd0471	CHEMBL490	Fc1ccc(cc1)[C@@H]2CCNC[C@H]2COc3ccc4OCOc4c3	IC50	=	Not Active	-1	MAP kinase ERK1	Sub-train	-1	0.912995	0.0870046	In
Cpd0472	CHEMBL1200600	C[C@H]1C[C@H]2[C@@H]3CC[C@](O)(C(=O)C)[C@@]3(C)C[C@H](O)[C@]2(F)[C@@]4(C)C=CC(=O)C=C14	IC50	=	Not Active	-1	MAP kinase ERK1	Sub-train	-1	0.994592	0.00540792	In
Cpd0473	CHEMBL42	CN1CCN(CC1)C2=Nc3cc(Cl)ccc3Nc4ccccc24	IC50	=	Not Active	-1	MAP kinase ERK1	Sub-train	-1	0.985408	0.0145922	In
Cpd0474	CHEMBL1493	CC1=C(Oc2c(cccc2C1=O)C(=O)OCCN3CCCCC3)c4ccccc4	IC50	=	Not Active	-1	MAP kinase ERK1	Sub-train	-1	0.878638	0.121362	In
Cpd0475	CHEMBL19236	COc1nc(C)nc(Cl)c1NC2=NCCN2	IC50	=	Not Active	-1	MAP kinase ERK1	Sub-train	-1	0.980175	0.0198248	In
Cpd0476	CHEMBL1586	C[C@H]1C[C@H]2[C@@H]3CCC4=CC(=O)C=C[C@]4(C)[C@@]3(Cl)[C@@H](O)C[C@]2(C)[C@@]1(O)C(=O)CO	IC50	=	Not Active	-1	MAP kinase ERK1	Sub-train	-1	0.997409	0.00259122	In
Cpd0477	CHEMBL716	OCCOCCN1CCN(CC1)C2=Nc3ccccc3Sc4ccccc24	IC50	=	Not Active	-1	MAP kinase ERK1	Test	-1	0.992703	0.00729679	In
Cpd0478	CHEMBL1308	Cc1cn[nH]c1	IC50	=	Not Active	-1	MAP kinase ERK1	Sub-train	-1	0.986923	0.0130773	In
Cpd0479	CHEMBL87285	C[C@]12CC[C@@H](O)C[C@@H]1CC[C@@H]3[C@@H]2CC[C@@]4(C)[C@H]3CCC4=O	IC50	=	Not Active	-1	MAP kinase ERK1	Test	-1	0.995976	0.00402435	In
Cpd0480	CHEMBL429	CC(CCc1ccccc1)NCC(O)c2ccc(O)c(c2)C(=O)N	IC50	=	Not Active	-1	MAP kinase ERK1	Sub-train	1	0.405653	0.594347	In
Cpd0481	CHEMBL1200624	CC(=O)O[C@H]1CC[C@@H]2[C@H]3CC[C@@]4(C)[C@@H](CC[C@@]4(OC(=O)C)C#C)[C@@H]3CCC2=C1	IC50	=	Not Active	-1	MAP kinase ERK1	Test	-1	0.901188	0.0988116	In
Cpd0482	CHEMBL451	CNC1=Nc2ccc(Cl)cc2C(=[N+]([O-])C1)c3ccccc3	IC50	=	Not Active	-1	MAP kinase ERK1	Sub-train	-1	0.980503	0.019497	In
Cpd0483	CHEMBL111861	C[C@]12CC[C@@H](O)C=C1CC[C@H]3[C@@H]4CC[C@](O)(C(=O)CO)[C@@]4(C)CC(=O)[C@H]23	IC50	=	Not Active	-1	MAP kinase ERK1	Sub-train	-1	0.991339	0.00866092	In
Cpd0484	CHEMBL389621	C[C@]12CCC(=O)C=C1CC[C@H]3[C@@H]4CC[C@](O)(C(=O)CO)[C@@]4(C)C[C@H](O)[C@H]23	IC50	=	Not Active	-1	MAP kinase ERK1	Sub-train	-1	0.991838	0.00816244	In
Cpd0485	CHEMBL45245	O=C1Nc2ccccc2c3ccccc13	IC50	=	Not Active	-1	MAP kinase ERK1	Test	-1	0.946961	0.0530394	In
Cpd0486	CHEMBL61	COc1cc(cc(OC)c1OC)[C@H]2[C@@H]3[C@H](COC3=O)[C@@H](O)c4cc5OCOc5cc24	IC50	=	Not Active	-1	MAP kinase ERK1	Sub-train	-1	0.931746	0.0682543	In
Cpd0487	CHEMBL975	[Na+].[O-]S(=O)(=O)CCS	IC50	=	Not Active	-1	MAP kinase ERK1	Sub-train	-1	0.998418	0.00158189	Outlier
Cpd0488	CHEMBL452	[O-][N+](=O)c1ccc2NC(=O)CN=C(c3ccccc3Cl)c2c1	IC50	=	Not Active	-1	MAP kinase ERK1	Sub-train	-1	0.953455	0.0465446	In
Cpd0489	CHEMBL936	OC(CCCN1CCCCC1)(c2ccccc2)c3ccccc3	IC50	=	Not Active	-1	MAP kinase ERK1	Sub-train	-1	0.975221	0.0247786	In
Cpd0490	CHEMBL24944	Oc1c(Br)cc(Br)cc1C(=O)Nc2ccc(Br)cc2	IC50	=	Not Active	-1	MAP kinase ERK1	Sub-train	-1	0.873847	0.126153	In
Cpd0492	CHEMBL1200629	[Br-].CC(=O)O[C@H]1C[C@@H]2CC[C@@H]3[C@H](CC[C@@]4(C)[C@H]3C[C@@H]([C@@H]4OC(=O)C)[N+]5(C)CCCCC5)[C@@]2(C)C[C@@H]1N6CCCCC6	IC50	=	Not Active	-1	MAP kinase ERK1	Sub-train	-1	0.998678	0.00132198	In
Cpd0493	CHEMBL1054	NS(=O)(=O)c1cc2c(NC(NS2(=O)=O)C(Cl)Cl)cc1Cl	IC50	=	Not Active	-1	MAP kinase ERK1	Sub-train	-1	0.997693	0.00230707	Outlier
Cpd0494	CHEMBL1464	CC(=O)CC(C1=C(O)c2ccccc2OC1=O)c3ccccc3	IC50	=	Not Active	-1	MAP kinase ERK1	Sub-train	-1	0.860444	0.139556	In
Cpd0500	CHEMBL386630	C[C@]12CC[C@H]3[C@@H](CCC4=CC(=O)CC[C@]34C)[C@@H]1CC[C@@H]2O	IC50	=	Not Active	-1	MAP kinase ERK1	Sub-train	-1	0.989033	0.010967	In
Cpd0504	CHEMBL290106	Oc1c(Cl)cc(Cl)cc1Sc2cc(Cl)cc(Cl)c2O	IC50	=	Not Active	-1	MAP kinase ERK1	Test	-1	0.999104	0.000896471	In
Cpd0505	CHEMBL1489254	CC(=O)OCC(COC(=O)C)OC(=O)C	IC50	=	Not Active	-1	MAP kinase ERK1	Sub-train	-1	0.997149	0.00285059	In
Cpd0506	CHEMBL1489	NC1=NC(=O)N(C=N1)[C@@H]2O[C@H](CO)[C@@H](O)[C@H]2O	IC50	=	Not Active	-1	MAP kinase ERK1	Test	-1	0.998223	0.00177714	In
Cpd0507	CHEMBL1371125	c1ccc2c(c1)c3cccc4ccc5cccc2c5c34	IC50	=	Not Active	-1	MAP kinase ERK1	Sub-train	-1	0.983228	0.0167723	In
Cpd0508	CHEMBL917	OC[C@H]1O[C@H](C[C@@H]1O)N2C=C(F)C(=O)NC2=O	IC50	=	Not Active	-1	MAP kinase ERK1	Sub-train	-1	0.994517	0.00548263	In
Cpd0511	CHEMBL1440	CN(C)[C@H]1[C@@H]2C[C@H]3C(=C(O)[C@]2(O)C(=O)C(=C1O)C(=O)N)C(=O)c4c(O)cccc4[C@@]3(C)O	IC50	=	Not Active	-1	MAP kinase ERK1	Sub-train	-1	0.996991	0.00300884	In
Cpd0512	CHEMBL44657	COc1cc(cc(OC)c1O)[C@H]2[C@@H]3[C@H](COC3=O)[C@H](O[C@@H]4O[C@@H]5CO[C@@H](C)O[C@H]5[C@H](O)[C@H]4O)c6cc7OCOc7cc26	IC50	=	Not Active	-1	MAP kinase ERK1	Sub-train	-1	0.869491	0.130509	In
Cpd0513	CHEMBL364713	COc1ccc2[C@H](OC(=O)c2c1OC)[C@@H]3N(C)CCc4cc5OCOc5c(OC)c34	IC50	=	Not Active	-1	MAP kinase ERK1	Sub-train	-1	0.980263	0.0197368	In
Cpd0514	CHEMBL585	Nc1nc(N)c2nc(c(N)nc2n1)c3ccccc3	IC50	=	Not Active	-1	MAP kinase ERK1	Test	-1	0.963114	0.0368863	In
Cpd0516	CHEMBL254219	C[C@H]1O[C@H](C[C@H](O)[C@@H]1O)O[C@H]2[C@@H](O)C[C@H](O[C@H]3[C@@H](O)C[C@H](O[C@H]4CC[C@@]5(C)[C@H](CC[C@@H]6[C@@H]5CC[C@]7(C)[C@H](CC[C@]67O)C8=CC(=O)OC8)C4)O[C@@H]3C)O[C@@H]2C	IC50	=	Not Active	-1	MAP kinase ERK1	Sub-train	-1	0.873509	0.126491	In
Cpd0517	CHEMBL803	NC1=NC(=O)N(C=C1)[C@@H]2O[C@H](CO)[C@@H](O)[C@@H]2O	IC50	=	Not Active	-1	MAP kinase ERK1	Test	-1	0.981002	0.0189981	In
Cpd0518	CHEMBL36994	COc1ccc(cc1)C(=O)N2CCCC2=O	IC50	=	Not Active	-1	MAP kinase ERK1	Test	-1	0.992392	0.00760838	In
Cpd0519	CHEMBL710	CC(C)(C)NC(=O)[C@H]1CC[C@H]2[C@@H]3CC[C@H]4NC(=O)C=C[C@]4(C)[C@H]3CC[C@]12C	IC50	=	Not Active	-1	MAP kinase ERK1	Sub-train	-1	0.996298	0.00370241	In
Cpd0521	CHEMBL3577645	COc1ccc(cc1)N2C(=O)\C(=C\c3ccc(OCC(=O)Nc4ccc(Cl)cc4)cc3)\N=C2c5ccccc5	IC50	=	47	1	MAP kinase ERK1	Test	1	0.341176	0.658824	In
Cpd0522	CHEMBL3577642	COc1ccc(NC(=O)COc2ccc(\C=C\3/N=C(N(C3=O)c4ccc(OC)cc4)c5ccccc5)cc2)cc1	IC50	=	23	1	MAP kinase ERK1	Sub-train	1	0.462586	0.537414	In
Cpd0523	CHEMBL3577640	COc1ccc(cc1)N2C(=O)\C(=C\c3ccc(OCC(=O)Nc4ccccc4OC)cc3)\N=C2c5ccccc5	IC50	=	43	1	MAP kinase ERK1	Sub-train	1	0.460226	0.539774	In
Cpd0524	CHEMBL3577638	COc1ccc(cc1)N2C(=O)\C(=C\c3ccc(OCC(=O)Nc4cccc(C)c4)cc3)\N=C2c5ccccc5	IC50	=	89	1	MAP kinase ERK1	Sub-train	1	0.39503	0.60497	In
Cpd0525	CHEMBL3577631	COc1cccc(NC(=O)COc2ccc(\C=C\3/N=C(N(C3=O)c4cccc(OC)c4)c5ccccc5)cc2)c1	IC50	=	57	1	MAP kinase ERK1	Sub-train	1	0.486786	0.513214	In
Cpd0528	CHEMBL499815	[K+].[K+].CC(C)CC(=O)O[C@H]1[C@H](O[C@@H]2C[C@H]([C@H]3CC[C@@]45C[C@@H](CCC4[C@]3(C)C2)C(=C)[C@H]5O)C(=O)O)O[C@H](CO)[C@@H](OS(=O)(=O)[O-])[C@@H]1OS(=O)(=O)[O-]	IC50	=	Not Active	-1	MAP kinase ERK1	Sub-train	-1	0.92601	0.0739899	Outlier
Cpd0532	CHEMBL1626	CN1CCC[C@@H]1CCO[C@](C)(c2ccccc2)c3ccc(Cl)cc3	IC50	=	Not Active	-1	MAP kinase ERK1	Sub-train	-1	0.952868	0.047132	In
Cpd0533	CHEMBL1902627	CC(C)NCC(O)c1ccccc1Cl	IC50	=	Not Active	-1	MAP kinase ERK1	Sub-train	-1	0.99753	0.00247026	In
Cpd0536	CHEMBL3133821	Oc1cccc(Nc2ccnc3[nH]c4ccccc4c23)c1	IC50	>	10000	-1	MAP kinase ERK1	Sub-train	-1	0.890071	0.109929	In
Cpd0538	CHEMBL1560	C[C@H](CS)C(=O)N1CCC[C@H]1C(=O)O	IC50	=	Not Active	-1	MAP kinase ERK1	Sub-train	-1	0.999409	0.000590894	In
Cpd0539	CHEMBL3577567	COc1cccc(c1)N2C(=O)\C(=C\c3ccc(OCC(=O)Nc4ccccc4OC)cc3)\N=C2c5ccccc5	IC50	=	46	1	MAP kinase ERK1	Sub-train	1	0.478678	0.521322	In
Cpd0540	CHEMBL3577639	COc1ccc(cc1)N2C(=O)\C(=C\c3ccc(OCC(=O)Nc4ccc(C)cc4)cc3)\N=C2c5ccccc5	IC50	=	23	1	MAP kinase ERK1	Sub-train	1	0.3959	0.6041	In
Cpd0541	CHEMBL3577636	COc1ccc(cc1)N2C(=O)\C(=C\c3ccc(OCC(=O)Nc4ccccc4)cc3)\N=C2c5ccccc5	IC50	=	23	1	MAP kinase ERK1	Sub-train	1	0.442087	0.557913	In
Cpd0542	CHEMBL3577635	COc1cccc(c1)N2C(=O)\C(=C\c3ccc(OCC(=O)Nc4ccc(Cl)cc4)cc3)\N=C2c5ccccc5	IC50	=	95	1	MAP kinase ERK1	Sub-train	1	0.358009	0.641991	In
Cpd0543	CHEMBL1536	CC(C)[C@@H](C)\C=C\[C@@H](C)[C@H]1CC[C@H]2\C(=C\C=C/3\C[C@@H](O)CCC3=C)\CCC[C@]12C	IC50	=	Not Active	-1	MAP kinase ERK1	Test	-1	0.984427	0.0155733	In
Cpd0544	CHEMBL3577637	COc1ccc(cc1)N2C(=O)\C(=C\c3ccc(OCC(=O)Nc4ccccc4C)cc3)\N=C2c5ccccc5	IC50	=	32	1	MAP kinase ERK1	Sub-train	1	0.384679	0.615321	In
Cpd0545	CHEMBL3577632	COc1ccc(NC(=O)COc2ccc(\C=C\3/N=C(N(C3=O)c4cccc(OC)c4)c5ccccc5)cc2)cc1	IC50	=	76	1	MAP kinase ERK1	Sub-train	1	0.481034	0.518966	In
Cpd0546	CHEMBL2	COc1cc2nc(nc(N)c2cc1OC)N3CCN(CC3)C(=O)c4occc4	IC50	=	Not Active	-1	MAP kinase ERK1	Test	-1	0.758603	0.241397	In
Cpd0547	CHEMBL104	Clc1ccccc1C(c2ccccc2)(c3ccccc3)n4ccnc4	IC50	=	Not Active	-1	MAP kinase ERK1	Sub-train	-1	0.992886	0.00711396	In
Cpd0548	CHEMBL495778	COC1=CC(=O)OC1(O)C(=C)C	IC50	=	Not Active	-1	MAP kinase ERK1	Test	-1	0.996874	0.00312567	In
Cpd0549	CHEMBL485259	CC12CCC(CC1)C(C)(C)O2	IC50	=	Not Active	-1	MAP kinase ERK1	Sub-train	-1	0.998906	0.0010943	In
Cpd0550	CHEMBL534	CN1CCC(=C2c3ccccc3CC(=O)c4sccc24)CC1	IC50	=	Not Active	-1	MAP kinase ERK1	Sub-train	-1	0.998094	0.00190593	In
Cpd0552	CHEMBL1289	Clc1cc(Cl)c(OCC#CI)cc1Cl	IC50	=	Not Active	-1	MAP kinase ERK1	Test	-1	0.989149	0.0108512	In
Cpd0554	CHEMBL20883	FC1=CN(C2CCCO2)C(=O)NC1=O	IC50	=	Not Active	-1	MAP kinase ERK1	Sub-train	-1	0.997296	0.00270406	In
Cpd0556	CHEMBL94	CNC(=O)Oc1ccc2N(C)[C@H]3N(C)CC[C@@]3(C)c2c1	IC50	=	Not Active	-1	MAP kinase ERK1	Sub-train	-1	0.906742	0.0932577	In
Cpd0559	CHEMBL954	CCN(CC)CCOc1ccc(cc1)\C(=C(\Cl)/c2ccccc2)\c3ccccc3	IC50	=	Not Active	-1	MAP kinase ERK1	Test	-1	0.98076	0.0192398	In
Cpd0560	CHEMBL222863	C[C@@H]1O[C@@H](O[C@H]2C[C@@H](O)[C@]3(CO)[C@H]4[C@H](O)C[C@]5(C)[C@H](CC[C@]5(O)[C@@H]4CC[C@]3(O)C2)C6=CC(=O)OC6)[C@H](O)[C@H](O)[C@H]1O	IC50	=	Not Active	-1	MAP kinase ERK1	Sub-train	-1	0.970877	0.0291227	In
Cpd0561	CHEMBL1089	NNCCc1ccccc1	IC50	=	Not Active	-1	MAP kinase ERK1	Test	-1	0.714815	0.285185	In
Cpd0564	CHEMBL1566	C[C@H]1O[C@H](O[C@H]2[C@H](O)[C@@H](O)[C@@H](O[C@H]3[C@H](O)[C@@H](O)[C@H](O)O[C@@H]3CO)O[C@@H]2CO)[C@H](O)[C@@H](O)[C@@H]1N[C@H]4C=C(CO)[C@@H](O)[C@H](O)[C@H]4O	IC50	=	Not Active	-1	MAP kinase ERK1	Test	-1	0.938717	0.0612832	In
Cpd0565	CHEMBL47	CC(C)CCC[C@@H](C)CCC[C@@H](C)CCC[C@]1(C)CCc2c(C)c(O)c(C)c(C)c2O1	IC50	=	Not Active	-1	MAP kinase ERK1	Sub-train	-1	0.991049	0.008951	In
Cpd0567	CHEMBL453	Cc1noc(NS(=O)(=O)c2ccc(N)cc2)c1C	IC50	=	Not Active	-1	MAP kinase ERK1	Sub-train	-1	0.975447	0.024553	In
Cpd0568	CHEMBL1076211	CC(CN1CCCCC1)C(=O)c2ccc(C)cc2	IC50	=	Not Active	-1	MAP kinase ERK1	Sub-train	-1	0.972103	0.027897	In
Cpd0569	CHEMBL527	CN1C(=C(O)c2ccccc2S1(=O)=O)C(=O)Nc3ccccn3	IC50	=	Not Active	-1	MAP kinase ERK1	Sub-train	-1	0.959861	0.0401392	In
Cpd0570	CHEMBL54126	[Br-].CN(C)C(=O)Oc1cccc(c1)[N+](C)(C)C	IC50	=	Not Active	-1	MAP kinase ERK1	Sub-train	-1	0.959369	0.0406314	In
Cpd0571	CHEMBL50588	CC[C@H]1CN2CCc3cc(OC)c(OC)cc3[C@@H]2C[C@@H]1C[C@H]4NCCc5cc(OC)c(OC)cc45	IC50	=	Not Active	-1	MAP kinase ERK1	Test	-1	0.967402	0.0325981	In
Cpd0572	CHEMBL18797	CSc1ccc(\C=C/2\C(=C(CC(=O)O)c3cc(F)ccc23)C)cc1	IC50	=	Not Active	-1	MAP kinase ERK1	Sub-train	-1	0.737954	0.262046	In
Cpd0573	CHEMBL108545	COC(=O)c1ccccc1O	IC50	=	Not Active	-1	MAP kinase ERK1	Test	-1	0.979626	0.0203743	In
Cpd0575	CHEMBL877	NC[C@@H]1CC[C@H](CC1)C(=O)O	IC50	=	Not Active	-1	MAP kinase ERK1	Test	-1	0.992962	0.00703829	In
Cpd0576	CHEMBL2106399	CO[C@H]1[C@H](O)CC(=O)O[C@H](C)C\C=C\C=C\[C@H](O)[C@H](C)C[C@H](CC=O)[C@@H]1O[C@@H]2O[C@H](C)[C@@H](O[C@H]3C[C@@](C)(O)[C@@H](OC(=O)CC(C)C)[C@H](C)O3)[C@@H]([C@H]2O)N(C)C	IC50	=	Not Active	-1	MAP kinase ERK1	Test	-1	0.982827	0.0171727	In
Cpd0578	CHEMBL1214185	CC[C@H]1OC(=O)[C@H](C)[C@@H](O[C@H]2C[C@@](C)(OC)[C@@H](O)[C@H](C)O2)[C@H](C)[C@@H](O[C@@H]3O[C@H](C)C[C@@H]([C@H]3O)N(C)C)[C@](C)(O)C[C@@H](C)\C(=N/OCOCCOC)\[C@H](C)[C@@H](O)[C@]1(C)O	IC50	=	Not Active	-1	MAP kinase ERK1	Sub-train	-1	0.99293	0.00706991	Outlier
Cpd0579	CHEMBL621	Clc1cccc(c1)N2CCN(CCCN3N=C4C=CC=CN4C3=O)CC2	IC50	=	Not Active	-1	MAP kinase ERK1	Sub-train	1	0.4162	0.5838	In
Cpd0580	CHEMBL443	Cc1onc(NS(=O)(=O)c2ccc(N)cc2)c1	IC50	=	Not Active	-1	MAP kinase ERK1	Sub-train	-1	0.980315	0.0196845	In
Cpd0581	CHEMBL817	Cc1ccc(cc1)S(=O)(=O)NC(=O)NN2CCCCCC2	IC50	=	Not Active	-1	MAP kinase ERK1	Sub-train	-1	0.998151	0.00184906	In
Cpd0584	CHEMBL267894	CCC1(CCC(C)C)C(=O)NC(=NC1=O)O	IC50	=	Not Active	-1	MAP kinase ERK1	Test	-1	0.999858	0.000141676	In
Cpd0592	CHEMBL1385840	CC(C)[C@@H]1N2C(=O)[C@](NC(=O)[C@H]3CN(C)[C@@H]4Cc5c[nH]c6cccc(C4=C3)c56)(O[C@@]2(O)[C@@H]7CCCN7C1=O)C(C)C	IC50	=	Not Active	-1	MAP kinase ERK1	Sub-train	-1	0.983518	0.0164816	In
Cpd0593	CHEMBL167911	COP(=O)(OC)OC=C(Cl)Cl	IC50	=	Not Active	-1	MAP kinase ERK1	Sub-train	-1	0.808769	0.191231	Outlier
Cpd0596	CHEMBL1073	Cc1cnc(cn1)C(=O)NCCc2ccc(cc2)S(=O)(=O)NC(=O)NC3CCCCC3	IC50	=	Not Active	-1	MAP kinase ERK1	Sub-train	-1	0.964789	0.0352111	In
Cpd0597	CHEMBL457299	OCCO	IC50	=	Not Active	-1	MAP kinase ERK1	Sub-train	-1	0.999791	0.000208698	Outlier
Cpd0601	CHEMBL428	N[C@@H]1[C@H]2CN(C[C@@H]12)c3nc4N(C=C(C(=O)O)C(=O)c4cc3F)c5ccc(F)cc5F	IC50	=	Not Active	-1	MAP kinase ERK1	Sub-train	-1	0.884408	0.115592	In
Cpd0605	CHEMBL364935	FC(F)(F)c1cnc(Nc2ccc(Br)cc2)nc1Nc3ccc4[nH]cnc4c3	IC50	=	750	-1	MAP kinase ERK1	Sub-train	1	0.198912	0.801088	In
Cpd0608	CHEMBL461727	OC[C@H]1O[C@@H](OC[C@H]2O[C@@H](O[C@@H](C#N)c3ccccc3)[C@H](O)[C@@H](O)[C@@H]2O)[C@H](O)[C@@H](O)[C@@H]1O	IC50	=	Not Active	-1	MAP kinase ERK1	Test	-1	0.773018	0.226982	In
Cpd0609	CHEMBL661	Cc1nnc2CN=C(c3ccccc3)c4cc(Cl)ccc4n12	IC50	=	Not Active	-1	MAP kinase ERK1	Sub-train	-1	0.889874	0.110126	In
Cpd0610	CHEMBL65	CC[C@@]1(O)C(=O)OCC2=C1C=C3N(Cc4cc5ccccc5nc34)C2=O	IC50	=	Not Active	-1	MAP kinase ERK1	Test	-1	0.938958	0.0610423	In
Cpd0612	CHEMBL1371937	CC(C)(CO)C(O)C(=O)NCCCO	IC50	=	Not Active	-1	MAP kinase ERK1	Test	-1	0.998701	0.00129942	In
Cpd0613	CHEMBL923	OC(Cc1cccnc1)(P(=O)(O)O)P(=O)(O)O	IC50	=	Not Active	-1	MAP kinase ERK1	Sub-train	-1	0.894426	0.105574	In
Cpd0615	CHEMBL516	CN1CCC(=C2c3ccccc3C=Cc4ccccc24)CC1	IC50	=	Not Active	-1	MAP kinase ERK1	Sub-train	-1	0.996121	0.00387924	In
Cpd0617	CHEMBL21731	CNCCCC12CCC(c3ccccc13)c4ccccc24	IC50	=	Not Active	-1	MAP kinase ERK1	Sub-train	-1	0.992968	0.00703247	In
Cpd0618	CHEMBL1747	NC[C@H]1O[C@H](O[C@@H]2[C@@H](N)C[C@@H](N)[C@H](O[C@H]3O[C@H](CO)[C@@H](O)[C@H](N)[C@H]3O)[C@H]2O)[C@H](N)C[C@@H]1O	IC50	=	Not Active	-1	MAP kinase ERK1	Sub-train	-1	0.973427	0.0265727	In
Cpd0620	CHEMBL689	OC[C@@H](O)[C@@H](O)[C@H](O)[C@H](O)CO	IC50	=	Not Active	-1	MAP kinase ERK1	Sub-train	-1	0.999426	0.000573712	In
Cpd0621	CHEMBL1095699	N[C@@H](COC(=O)C=[N+]=[N-])C(=O)O	IC50	=	Not Active	-1	MAP kinase ERK1	Sub-train	-1	0.999017	0.000982942	In
Cpd0623	CHEMBL820	CS(=O)(=O)OCCCCOS(=O)(=O)C	IC50	=	Not Active	-1	MAP kinase ERK1	Sub-train	-1	0.998804	0.00119599	Outlier
Cpd0625	CHEMBL283196	O=C1C=C(Oc2c1ccc3ccccc23)c4ccccc4	IC50	=	Not Active	-1	MAP kinase ERK1	Test	-1	0.807452	0.192548	In
Cpd0626	CHEMBL123292	C[C@H]1C[C@H](C)C(=O)[C@@H](C1)[C@H](O)CC2CC(=O)NC(=O)C2	IC50	=	Not Active	-1	MAP kinase ERK1	Sub-train	-1	0.998029	0.00197129	In
Cpd0629	CHEMBL158	C[C@H]1[C@H](NC(=O)\C(=N/OC(C)(C)C(=O)O)\c2csc(N)n2)C(=O)N1S(=O)(=O)O	IC50	=	Not Active	-1	MAP kinase ERK1	Sub-train	-1	0.925551	0.0744491	Outlier
Cpd0634	CHEMBL270299	CC(C)(C)c1ccc(cc1)S(=O)(=O)\C=C\C#N	IC50	=	Not Active	-1	MAP kinase ERK1	Sub-train	-1	0.972896	0.0271039	In
Cpd0635	CHEMBL261237	N\C(=C(\C#N)/c1ccccc1C(F)(F)F)\Sc2ccc(N)cc2	IC50	>	10000	-1	MAP kinase ERK1	Test	-1	0.96325	0.0367498	In
Cpd0636	CHEMBL267044	CCN1CCC[C@H]1CNC(=O)c2cc(ccc2OC)S(=O)(=O)N	IC50	=	Not Active	-1	MAP kinase ERK1	Sub-train	-1	0.699727	0.300273	In
Cpd0637	CHEMBL302795	CN1C(=C(O)c2sccc2S1(=O)=O)C(=O)Nc3ccccn3	IC50	=	Not Active	-1	MAP kinase ERK1	Sub-train	-1	0.996194	0.00380635	In
Cpd0641	CHEMBL932	OCCN(CCO)c1nc(N2CCCCC2)c3nc(nc(N4CCCCC4)c3n1)N(CCO)CCO	IC50	=	Not Active	-1	MAP kinase ERK1	Test	-1	0.989236	0.0107635	In
Cpd0642	CHEMBL1172	Clc1ccc2C(=C3CCNCC3)c4ncccc4CCc2c1	IC50	=	Not Active	-1	MAP kinase ERK1	Sub-train	-1	0.974443	0.0255571	In
Cpd0643	CHEMBL209148	COc1cc(C)c(Sc2cnc(NC(=O)c3ccc(CNC(C)C(C)(C)C)cc3)s2)cc1C(=O)N4CCN(CC4)C(=O)C	IC50	>	50000	-1	MAP kinase ERK1	Sub-train	-1	0.995284	0.00471563	In
Cpd0644	CHEMBL567	OCCN1CCN(CCCN2c3ccccc3Sc4ccc(Cl)cc24)CC1	IC50	=	Not Active	-1	MAP kinase ERK1	Sub-train	-1	0.997803	0.00219686	In
Cpd0647	CHEMBL435	NS(=O)(=O)c1cc2c(NCNS2(=O)=O)cc1Cl	IC50	=	Not Active	-1	MAP kinase ERK1	Sub-train	-1	0.995223	0.00477714	In
Cpd0650	CHEMBL252557	OCC(=O)O	IC50	=	Not Active	-1	MAP kinase ERK1	Sub-train	-1	0.999236	0.000763605	Outlier
Cpd0652	CHEMBL502620	CC[C@@]1(O)C[C@H](O[C@H]2C[C@@H]([C@H](O[C@H]3C[C@H](O)[C@H](O[C@H]4CCC(=O)[C@H](C)O4)[C@H](C)O3)[C@H](C)O2)N(C)C)c5c(O)c6C(=O)c7c(O)cccc7C(=O)c6cc5[C@H]1C(=O)OC	IC50	=	Not Active	-1	MAP kinase ERK1	Sub-train	-1	0.95315	0.04685	In
Cpd0654	CHEMBL404811	C[C@@H]1CC[C@@]2(OC1)O[C@H]3[C@@H](O)[C@H]4[C@@H]5CC[C@H]6C[C@@H](O[C@@H]7O[C@H](CO)[C@H](O[C@@H]8O[C@H](CO)C(O)[C@H](O[C@@H]9OC[C@@H](O)[C@H](O)[C@H]9O)[C@H]8O[C@@H]%10O[C@H](CO)[C@H](O)[C@H](O[C@@H]%11O[C@H](CO)[C@@H](O)[C@H](O)[C@H]%11O)[C@H]%10O)[C@H](O)[C@H]7O)[C@H](O)C[C@]6(C)[C@H]5CC[C@]4(C)[C@H]3[C@@H]2C	IC50	=	Not Active	-1	MAP kinase ERK1	Test	-1	0.984727	0.0152731	Outside-AD
Cpd0655	CHEMBL30327	Clc1cc2Oc3cc(Cl)c(Cl)cc3Oc2cc1Cl	IC50	=	Not Active	-1	MAP kinase ERK1	Sub-train	-1	0.98481	0.0151898	In
Cpd0656	CHEMBL1235242	N[C@@H](Cc1ccc(F)cc1)C(=O)O	IC50	=	Not Active	-1	MAP kinase ERK1	Sub-train	-1	0.963636	0.0363636	In
Cpd0659	CHEMBL7568	CCN(CC)CCCC(C)Nc1c2ccc(Cl)cc2nc3ccc(OC)cc13	IC50	=	Not Active	-1	MAP kinase ERK1	Sub-train	-1	0.962175	0.0378255	In
Cpd0660	CHEMBL1200656	C[C@@H]1C\C=C\C=C\C=C\C=C\[C@@H](C[C@@H]2O[C@](O)(C[C@@H](O)C[C@H]3O[C@@H]3\C=C\C(=O)O1)C[C@H](O)[C@H]2C(=O)O)O[C@@H]4O[C@H](C)[C@@H](O)[C@H](N)[C@@H]4O	IC50	=	Not Active	-1	MAP kinase ERK1	Test	-1	0.761914	0.238086	In
Cpd0666	CHEMBL108	NC(=O)N1c2ccccc2C=Cc3ccccc13	IC50	=	Not Active	-1	MAP kinase ERK1	Sub-train	-1	0.716485	0.283515	In
Cpd0669	CHEMBL472	COc1ccc(Cl)cc1C(=O)NCCc2ccc(cc2)S(=O)(=O)NC(=O)NC3CCCCC3	IC50	=	Not Active	-1	MAP kinase ERK1	Sub-train	-1	0.862062	0.137938	In
Cpd0670	CHEMBL1463	NC1=C(F)C=NC(=O)N1	IC50	=	Not Active	-1	MAP kinase ERK1	Sub-train	-1	0.99544	0.00455954	In
Cpd0672	CHEMBL177756	OC(=O)c1ccccc1C2=C3C=CC(=O)C=C3Oc4cc(O)ccc24	IC50	=	Not Active	-1	MAP kinase ERK1	Sub-train	-1	0.980795	0.0192046	In
Cpd0673	CHEMBL64894	[Cl-].CN(C)c1ccc(cc1)C(=C2C=CC(=[N+](C)C)C=C2)c3ccc(cc3)N(C)C	IC50	=	Not Active	-1	MAP kinase ERK1	Sub-train	-1	0.991726	0.00827432	In
Cpd0674	CHEMBL296586	Brc1ccc2[nH]c3c(CC(=O)Nc4ccccc34)c2c1	IC50	=	20000	-1	MAP kinase ERK1	Sub-train	-1	0.918146	0.0818545	In
Cpd0677	CHEMBL712	COc1ccc(cc1)C2C(=O)c3ccccc3C2=O	IC50	=	Not Active	-1	MAP kinase ERK1	Sub-train	-1	0.930545	0.0694552	In
Cpd0679	CHEMBL165790	CC(C)Oc1ccc2C(=O)C(=COc2c1)c3ccccc3	IC50	=	Not Active	-1	MAP kinase ERK1	Sub-train	-1	0.895453	0.104547	In
Cpd0682	CHEMBL3084803	CO[C@H]1[C@@H](O)[C@H](N)[C@@H](O[C@H]2O[C@@H](CC[C@H]2N)[C@H](C)N)[C@H](O)[C@@H]1N(C)C(=O)CN	IC50	=	Not Active	-1	MAP kinase ERK1	Sub-train	-1	0.995944	0.00405566	In
Cpd0683	CHEMBL177	NCC[C@H](O)C(=O)N[C@@H]1C[C@H](N)[C@@H](O[C@H]2O[C@H](CN)[C@@H](O)[C@H](O)[C@H]2O)[C@H](O)[C@H]1O[C@H]3O[C@H](CO)[C@@H](O)[C@H](N)[C@H]3O	IC50	=	Not Active	-1	MAP kinase ERK1	Sub-train	-1	0.952837	0.047163	In
Cpd0687	CHEMBL192	CCCc1nn(C)c2C(=O)NC(=Nc12)c3cc(ccc3OCC)S(=O)(=O)N4CCN(C)CC4	IC50	=	Not Active	-1	MAP kinase ERK1	Sub-train	-1	0.995753	0.0042466	In
Cpd0690	CHEMBL178	COc1cccc2C(=O)c3c(O)c4C[C@](O)(C[C@H](O[C@H]5C[C@H](N)[C@H](O)[C@H](C)O5)c4c(O)c3C(=O)c12)C(=O)C	IC50	=	Not Active	-1	MAP kinase ERK1	Sub-train	-1	0.900731	0.0992686	In
Cpd0696	CHEMBL63560	C[C@](O)(CS(=O)(=O)c1ccc(F)cc1)C(=O)Nc2ccc(C#N)c(c2)C(F)(F)F	IC50	=	Not Active	-1	MAP kinase ERK1	Sub-train	-1	0.877509	0.122491	In
Cpd0699	CHEMBL12131	Cc1cc(C(C#N)c2ccc(Cl)cc2)c(Cl)cc1NC(=O)c3cc(I)cc(I)c3O	IC50	=	Not Active	-1	MAP kinase ERK1	Sub-train	-1	0.970408	0.0295923	In
Cpd0701	CHEMBL84	CC[C@@]1(O)C(=O)OCC2=C1C=C3N(Cc4cc5c(CN(C)C)c(O)ccc5nc34)C2=O	IC50	=	Not Active	-1	MAP kinase ERK1	Sub-train	-1	0.9518	0.0481999	In
Cpd0703	CHEMBL95764	OC(=O)CNCP(=O)(O)O	IC50	=	Not Active	-1	MAP kinase ERK1	Test	-1	0.743663	0.256337	In
Cpd0707	CHEMBL429023	COc1cc2OC[C@H]3Oc4c5C[C@@H](Oc5ccc4C(=O)[C@H]3c2cc1OC)C(=C)C	IC50	=	Not Active	-1	MAP kinase ERK1	Sub-train	-1	0.870684	0.129316	In
Cpd0716	CHEMBL27769	C[C@]12CC[C@H]3[C@@H](CC[C@H]4CC(=O)CC[C@]34C)[C@@H]1CC[C@@H]2O	IC50	=	Not Active	-1	MAP kinase ERK1	Test	-1	0.995381	0.00461878	In
Cpd0718	CHEMBL841	CN(C)C(=O)C(CCN1CCC(O)(CC1)c2ccc(Cl)cc2)(c3ccccc3)c4ccccc4	IC50	=	Not Active	-1	MAP kinase ERK1	Test	-1	0.930769	0.069231	In
Cpd0719	CHEMBL1201117	COc1ccccc1OCC(O)COC(=O)N	IC50	=	Not Active	-1	MAP kinase ERK1	Sub-train	-1	0.983143	0.016857	Outlier
Cpd0727	CHEMBL514	ClCCN(N=O)C(=O)NC1CCCCC1	IC50	=	Not Active	-1	MAP kinase ERK1	Sub-train	-1	0.958208	0.0417918	In
Cpd0732	CHEMBL164290	CCN(CC)N=O	IC50	=	Not Active	-1	MAP kinase ERK1	Sub-train	-1	0.998438	0.00156244	In
Cpd0733	CHEMBL532	CC[C@H]1OC(=O)[C@H](C)[C@@H](O[C@H]2C[C@@](C)(OC)[C@@H](O)[C@H](C)O2)[C@H](C)[C@@H](O[C@@H]3O[C@H](C)C[C@@H]([C@H]3O)N(C)C)[C@](C)(O)C[C@@H](C)C(=O)[C@H](C)[C@@H](O)[C@]1(C)O	IC50	=	Not Active	-1	MAP kinase ERK1	Sub-train	-1	0.997988	0.00201233	In
Cpd0736	CHEMBL498847	CC(O)Cn1c(C)ncc1[N+](=O)[O-]	IC50	=	Not Active	-1	MAP kinase ERK1	Sub-train	-1	0.995738	0.00426153	In
Cpd0738	CHEMBL15770	C[S+]([O-])c1ccc(\C=C/2\C(=C(CC(=O)O)c3cc(F)ccc23)C)cc1	IC50	=	Not Active	-1	MAP kinase ERK1	Test	-1	0.748947	0.251053	In
Cpd0739	CHEMBL19215	CN1C[C@H](CNC(=O)OCc2ccccc2)C[C@H]3[C@H]1Cc4cn(C)c5cccc3c45	IC50	=	Not Active	-1	MAP kinase ERK1	Sub-train	-1	0.64301	0.35699	In
Cpd0741	CHEMBL374478	CO[C@H]1\C=C\O[C@@]2(C)Oc3c(C)c(O)c4c(O)c(NC(=O)\C(=C/C=C/[C@H](C)[C@H](O)[C@@H](C)[C@@H](O)[C@@H](C)[C@H](OC(=O)C)[C@@H]1C)\C)c(\C=N\N5CCN(C)CC5)c(O)c4c3C2=O	IC50	=	Not Active	-1	MAP kinase ERK1	Test	-1	0.976555	0.023445	In
Cpd0742	CHEMBL3039597	CNC(C)[C@@H]1CC[C@@H](N)[C@@H](O[C@@H]2[C@@H](N)C[C@@H](N)[C@H](O[C@H]3OC[C@](C)(O)[C@H](NC)[C@H]3O)[C@H]2O)O1.CN[C@@H]4[C@@H](O)[C@@H](O[C@H]5[C@H](N)C[C@H](N)[C@@H](O[C@H]6O[C@H](CN)CC[C@H]6N)[C@@H]5O)OC[C@]4(C)O.CN[C@@H]7[C@@H](O)[C@@H](O[C@H]8[C@H](N)C[C@H](N)[C@@H](O[C@H]9O[C@@H](CC[C@H]9N)C(C)N)[C@@H]8O)OC[C@]7(C)O	IC50	=	Not Active	-1	MAP kinase ERK1	Sub-train	-1	0.991663	0.00833676	In
Cpd0743	CHEMBL1431	CN(C)C(=N)NC(=N)N	IC50	=	Not Active	-1	MAP kinase ERK1	Sub-train	-1	0.999858	0.00014169	In
Cpd0745	CHEMBL772	CO[C@H]1[C@@H](C[C@@H]2CN3CCc4c([nH]c5cc(OC)ccc45)[C@H]3C[C@@H]2[C@@H]1C(=O)OC)OC(=O)c6cc(OC)c(OC)c(OC)c6	IC50	=	Not Active	-1	MAP kinase ERK1	Test	-1	0.945226	0.0547744	In
Cpd0746	CHEMBL26260	O=C1C=C(Oc2ccc3ccccc3c12)c4ccccc4	IC50	=	5466.7	-1	MAP kinase ERK1	Sub-train	-1	0.837264	0.162736	In
Cpd0750	CHEMBL902	NC(=Nc1nc(CSCC\C(=N\S(=O)(=O)N)\N)cs1)N	IC50	=	Not Active	-1	MAP kinase ERK1	Sub-train	-1	0.916349	0.0836514	Outlier
Cpd0751	CHEMBL1487	CC(C)c1c(C(=O)Nc2ccccc2)c(c3ccccc3)c(c4ccc(F)cc4)n1CC[C@@H](O)C[C@@H](O)CC(=O)O	IC50	=	Not Active	-1	MAP kinase ERK1	Sub-train	-1	0.993991	0.00600936	In
Cpd0752	CHEMBL12948	CC1CCC(CC1)NC(=O)N(CCCl)N=O	IC50	=	Not Active	-1	MAP kinase ERK1	Sub-train	-1	0.956726	0.043274	In
Cpd0754	CHEMBL3577566	COc1cccc(c1)N2C(=O)\C(=C\c3ccc(OCC(=O)Nc4ccc(C)cc4)cc3)\N=C2c5ccccc5	IC50	=	25	1	MAP kinase ERK1	Sub-train	1	0.41375	0.58625	In
Cpd0755	CHEMBL3577564	COc1cccc(c1)N2C(=O)\C(=C\c3ccc(OCC(=O)Nc4ccccc4C)cc3)\N=C2c5ccccc5	IC50	=	43	1	MAP kinase ERK1	Sub-train	1	0.402358	0.597642	In
Cpd0756	CHEMBL3577563	COc1cccc(c1)N2C(=O)\C(=C\c3ccc(OCC(=O)Nc4ccccc4)cc3)\N=C2c5ccccc5	IC50	=	65	1	MAP kinase ERK1	Sub-train	1	0.460449	0.539551	In
Cpd0770	CHEMBL3590107	O=C(CN1CC[C@H](C1)C(=O)Nc2ccc3[nH]nc(c4ccncc4)c3c2)N5CCN(CC5)c6ccc(cc6)c7ncccn7	IC50	=	4	1	MAP kinase ERK1	Sub-train	1	0.0547472	0.945253	In
Cpd0771	CHEMBL3745885	CN1C(=O)C(=Cc2cnc(Nc3ccc4[nH]ccc4c3)nc12)S(=O)(=O)c5ccc(F)cc5F	IC50	>	10000	-1	MAP kinase ERK1	Test	-1	0.991881	0.00811908	In
Cpd0773	CHEMBL822	CN(C\C=C\C#CC(C)(C)C)Cc1cccc2ccccc12	IC50	=	Not Active	-1	MAP kinase ERK1	Sub-train	-1	0.92853	0.07147	In
Cpd0774	CHEMBL58	OCCNCCNc1ccc(NCCNCCO)c2C(=O)c3c(O)ccc(O)c3C(=O)c12	IC50	=	Not Active	-1	MAP kinase ERK1	Sub-train	-1	0.969493	0.0305071	In
Cpd0775	CHEMBL1349	CC(C)[C@H](N)C(=O)OCCOCn1cnc2C(=O)N=C(N)Nc12	IC50	=	Not Active	-1	MAP kinase ERK1	Sub-train	-1	0.999625	0.000374875	In
Cpd0776	CHEMBL493	CC(C)C[C@@H]1N2C(=O)[C@](NC(=O)[C@H]3CN(C)[C@@H]4Cc5c(Br)[nH]c6cccc(C4=C3)c56)(O[C@@]2(O)[C@@H]7CCCN7C1=O)C(C)C	IC50	=	Not Active	-1	MAP kinase ERK1	Sub-train	-1	0.990538	0.00946155	In
Cpd0791	CHEMBL508112	S(Sc1nc2ccccc2s1)c3nc4ccccc4s3	IC50	=	Not Active	-1	MAP kinase ERK1	Test	1	0.125871	0.874129	Outside-AD
Cpd0792	CHEMBL286398	CC(O)CO	IC50	=	Not Active	-1	MAP kinase ERK1	Sub-train	-1	0.999694	0.000306265	Outlier
Cpd0801	CHEMBL787	CC(C)(O)c1ccccc1CC[C@@H](SCC2(CC(=O)O)CC2)c3cccc(\C=C\c4ccc5ccc(Cl)cc5n4)c3	IC50	=	Not Active	-1	MAP kinase ERK1	Sub-train	1	0.0433449	0.956655	In
Cpd0802	CHEMBL157138	CCN(CC)C(=O)N[C@@H]1CN(C)[C@@H]2Cc3c[nH]c4cccc(C2=C1)c34	IC50	=	Not Active	-1	MAP kinase ERK1	Test	-1	0.967922	0.0320782	In
Cpd0803	CHEMBL2105807	N.CO[C@H]1C[C@@H](O[C@H]2C[C@@H](O[C@H]2[C@]3(C)CC[C@@H](O3)[C@]4(C)CC[C@]5(C[C@H](O)[C@@H](C)[C@H](O5)[C@@H](C)[C@@H]6O[C@](O)(CC(=O)O)[C@@H](C)[C@H](OC)[C@H]6OC)O4)[C@H]7O[C@](C)(O)[C@H](C)C[C@@H]7C)O[C@@H](C)[C@@H]1OC	IC50	=	Not Active	-1	MAP kinase ERK1	Sub-train	-1	0.99633	0.0036703	Outlier
Cpd0804	CHEMBL134342	OC(=O)CCCC[C@@H]1CCSS1	IC50	=	Not Active	-1	MAP kinase ERK1	Sub-train	1	0.287699	0.712301	Outlier
Cpd0805	CHEMBL788	OC[C@H]1O[C@H](C[C@@H]1O)N2C=C(I)C(=O)NC2=O	IC50	=	Not Active	-1	MAP kinase ERK1	Sub-train	-1	0.999846	0.000154164	In
Cpd0806	CHEMBL227934	O=C1C[C@@H]2OCC=C3CN4CC[C@@]56[C@@H]4C[C@@H]3[C@@H]2[C@@H]5N1c7ccccc67	IC50	=	Not Active	-1	MAP kinase ERK1	Test	-1	0.988495	0.0115054	In
Cpd0807	CHEMBL86754	Oc1c(I)cc(I)c2cccnc12	IC50	=	5264	-1	MAP kinase ERK1	Sub-train	-1	0.99955	0.000450422	In
Cpd0808	CHEMBL1200862	C[C@](N)(Cc1ccc(O)cc1)C(=O)O	IC50	=	Not Active	-1	MAP kinase ERK1	Sub-train	-1	0.969956	0.0300436	In
Cpd0812	CHEMBL1643	NC(=O)c1ncn(n1)[C@@H]2O[C@H](CO)[C@@H](O)[C@H]2O	IC50	=	Not Active	-1	MAP kinase ERK1	Sub-train	-1	0.971122	0.0288782	In
Cpd0818	CHEMBL1230813	OC[C@H]1O[C@@H]2O[C@H]3[C@H](O)[C@@H](O)[C@H](O[C@@H]3CO)O[C@H]4[C@H](O)[C@@H](O)[C@H](O[C@@H]4CO)O[C@H]5[C@H](O)[C@@H](O)[C@H](O[C@@H]5CO)O[C@H]6[C@H](O)[C@@H](O)[C@H](O[C@@H]6CO)O[C@H]7[C@H](O)[C@@H](O)[C@H](O[C@@H]7CO)O[C@H]1[C@H](O)[C@H]2O	IC50	=	Not Active	-1	MAP kinase ERK1	Sub-train	-1	0.775139	0.224861	In
Cpd0820	CHEMBL1256017	NC(=N)NCCCCNC(=N)N.OS(=O)(=O)O	IC50	=	Not Active	-1	MAP kinase ERK1	Sub-train	-1	0.998367	0.00163349	In
Cpd0822	CHEMBL870	NCCCC(O)(P(=O)(O)O)P(=O)(O)O	IC50	=	Not Active	-1	MAP kinase ERK1	Sub-train	-1	0.938219	0.061781	Outlier
Cpd0823	CHEMBL19224	COc1ccc(Cc2nccc3cc(OC)c(OC)cc23)cc1OC	IC50	=	Not Active	-1	MAP kinase ERK1	Sub-train	-1	0.864449	0.135551	In
Cpd0826	CHEMBL13341	CN1C(=O)CN=C(c2ccccc2)c3cc(ccc13)[N+](=O)[O-]	IC50	=	Not Active	-1	MAP kinase ERK1	Sub-train	-1	0.967987	0.0320133	In
Cpd0829	CHEMBL291338	Oc1c(Cl)cc(Cl)cc1C(=O)Nc2ccc(Cl)c(Cl)c2	IC50	=	Not Active	-1	MAP kinase ERK1	Sub-train	-1	0.855829	0.144171	In
Cpd0833	CHEMBL29292	CC(C)C[C@H](NC(=O)[C@@H](O)[C@H](N)Cc1ccccc1)C(=O)O	IC50	=	Not Active	-1	MAP kinase ERK1	Sub-train	-1	0.955723	0.0442769	In
Cpd0836	CHEMBL184618	NC[C@@H]1O[C@H](O[C@H]2[C@@H](O)[C@H](O[C@@H]3[C@@H](O)[C@H](N)C[C@H](N)[C@H]3O[C@H]4O[C@H](CN)[C@@H](O)[C@H](O)[C@H]4N)O[C@@H]2CO)[C@H](N)[C@@H](O)[C@@H]1O	IC50	=	Not Active	-1	MAP kinase ERK1	Sub-train	-1	0.977282	0.0227177	In
Cpd0837	CHEMBL878	CC1Nc2cc(Cl)c(cc2C(=O)N1c3ccccc3C)S(=O)(=O)N	IC50	=	Not Active	-1	MAP kinase ERK1	Sub-train	-1	0.552572	0.447428	In
Cpd0838	CHEMBL1430	CC(C)(S)[C@@H](N)C(=O)O	IC50	=	Not Active	-1	MAP kinase ERK1	Sub-train	-1	0.99953	0.000470331	In
Cpd0841	CHEMBL1243	Nc1ccc(cc1)S(=O)(=O)NC(=O)c2ccccc2	IC50	=	Not Active	-1	MAP kinase ERK1	Sub-train	-1	0.938537	0.0614634	In
Cpd0846	CHEMBL90555	CC[C@]1(O)C[C@H]2CN(CCc3c([nH]c4ccccc34)[C@@](C2)(C(=O)OC)c5cc6c(cc5OC)N(C=O)[C@H]7[C@](O)([C@H](OC(=O)C)[C@]8(CC)C=CCN9CC[C@]67[C@H]89)C(=O)OC)C1	IC50	=	Not Active	-1	MAP kinase ERK1	Sub-train	-1	0.996942	0.00305751	Outlier
Cpd0848	CHEMBL437	Nc1ccc(cc1)S(=O)(=O)Nc2nccs2	IC50	=	Not Active	-1	MAP kinase ERK1	Sub-train	-1	0.991251	0.00874912	In
Cpd0854	CHEMBL2367892	CC(=O)N[C@H]1[C@@H](O)[C@H](O)[C@H](CO)O[C@H]1O[C@H]2[C@@H]3NC(=O)[C@H](NC(=O)[C@@H]4NC(=O)[C@H]5NC(=O)[C@@H](Cc6ccc(Oc7cc4cc(Oc8ccc2cc8Cl)c7O[C@@H]9O[C@@H](CO)[C@@H](O)[C@H](O)[C@@H]9NC(=O)C)c(Cl)c6)NC(=O)[C@H](N)c%10ccc(O)c(Oc%11cc(O)cc5c%11)c%10)c%12ccc(O)c(c%12)c%13c(O[C@H]%14O[C@H](CO)[C@@H](O)[C@@H](O)[C@@H]%14O)cc(O)cc%13[C@H](NC3=O)C(=O)O	IC50	=	Not Active	-1	MAP kinase ERK1	Test	1	0.00648947	0.993511	Outside-AD
Cpd0858	CHEMBL1255837	CC(C)[C@@]1(NC(=O)[C@@H]2C[C@H]3[C@@H](Cc4c[nH]c5cccc3c45)N(C)C2)O[C@@]6(O)[C@@H]7CCCN7C(=O)[C@H](Cc8ccccc8)N6C1=O.CS(=O)(=O)O	IC50	=	Not Active	-1	MAP kinase ERK1	Sub-train	-1	0.857784	0.142216	In
Cpd0860	CHEMBL583	CC1CN(CCN1)c2cc3N(C=C(C(=O)O)C(=O)c3c(C)c2F)C4CC4	IC50	=	Not Active	-1	MAP kinase ERK1	Sub-train	-1	0.9941	0.00590042	In
Cpd0861	CHEMBL296682	Nc1nccc(n1)c2c[nH]c3c(Br)ccc(O)c23	IC50	>	100000	-1	MAP kinase ERK1	Sub-train	-1	0.979417	0.0205831	In
Cpd0865	CHEMBL406	CC1Cc2ccccc2N1NC(=O)c3ccc(Cl)c(c3)S(=O)(=O)N	IC50	=	Not Active	-1	MAP kinase ERK1	Sub-train	-1	0.876874	0.123126	In
Cpd0869	CHEMBL460499	CCCCCCNC(=O)N1C=C(F)C(=O)NC1=O	IC50	=	6121	-1	MAP kinase ERK1	Test	-1	0.999226	0.000773887	In
Cpd0872	CHEMBL4089159	COC(=O)C1=C(Nc2ccccc2Cl)O\C(=C/c3c[nH]c4ncccc34)\C1=O	IC50	=	278	1	MAP kinase ERK1	Sub-train	-1	0.703296	0.296704	In
Cpd0879	CHEMBL888	NC1=NC(=O)N(C=C1)[C@@H]2O[C@H](CO)[C@@H](O)C2(F)F	IC50	=	Not Active	-1	MAP kinase ERK1	Test	-1	0.976567	0.0234328	In
Cpd0880	CHEMBL2205766	CC(C)(C)NS(=O)(=O)c1cncc(c1)c2ccn3nc(N)nc3c2	IC50	>	10000	-1	MAP kinase ERK1	Sub-train	-1	0.997759	0.00224132	In
Cpd0881	CHEMBL629	CN(C)CCC=C1c2ccccc2CCc3ccccc13	IC50	=	Not Active	-1	MAP kinase ERK1	Test	-1	0.993551	0.00644869	In
Cpd0882	CHEMBL119385	Fc1ccc(SC2=NN3C=NC(=O)C(=C3C=C2)c4c(Cl)cccc4Cl)c(F)c1	IC50	=	Not Active	-1	MAP kinase ERK1	Sub-train	-1	0.963066	0.036934	In
Cpd0884	CHEMBL119443	C[C@@H](CO)NC(=O)[C@H]1CN(C)[C@@H]2Cc3c[nH]c4cccc(C2=C1)c34	IC50	=	Not Active	-1	MAP kinase ERK1	Sub-train	-1	0.984407	0.015593	In
Cpd0885	CHEMBL1372	N[C@@H](CCC(=O)N[C@@H](CSSC[C@H](NC(=O)CC[C@H](N)C(=O)O)C(=O)NCC(=O)O)C(=O)NCC(=O)O)C(=O)O	IC50	=	Not Active	-1	MAP kinase ERK1	Sub-train	1	0.0279318	0.972068	Outlier
Cpd0886	CHEMBL1055	NS(=O)(=O)c1cc(ccc1Cl)C2(O)NC(=O)c3ccccc23	IC50	=	Not Active	-1	MAP kinase ERK1	Sub-train	-1	0.556313	0.443687	In
Cpd0889	CHEMBL157548	CN1C[C@@H]2C[C@H]1CN2c3cc4N(C=C(C(=O)O)C(=O)c4cc3F)C5CC5	IC50	=	Not Active	-1	MAP kinase ERK1	Sub-train	-1	0.992985	0.00701525	In
Cpd0890	CHEMBL572	[O-][N+](=O)c1oc(\C=N\N2CC(=O)NC2=O)cc1	IC50	=	Not Active	-1	MAP kinase ERK1	Sub-train	-1	0.960661	0.0393394	In
Cpd0891	CHEMBL1231107	Nc1nc(N)nc(NC2CC2)n1	IC50	=	Not Active	-1	MAP kinase ERK1	Sub-train	-1	0.991864	0.00813637	In
Cpd0893	CHEMBL363648	CCc1nc(c2cccc(C)c2)c(s1)c3ccnc(NC(=O)c4ccccc4)c3	IC50	>	10000	-1	MAP kinase ERK1	Test	-1	0.596043	0.403957	In
Cpd0894	CHEMBL1447	CCC[C@@H]1C[C@H](N(C)C1)C(=O)N[C@H]([C@@H](C)O)[C@H]2O[C@H](SC)[C@H](O)[C@@H](O)[C@H]2O	IC50	=	Not Active	-1	MAP kinase ERK1	Sub-train	-1	0.995035	0.00496452	In
Cpd0895	CHEMBL4	CC1COc2c(N3CCN(C)CC3)c(F)cc4C(=O)C(=CN1c24)C(=O)O	IC50	=	Not Active	-1	MAP kinase ERK1	Sub-train	-1	0.998902	0.00109777	In
Cpd0898	CHEMBL897	CCCN(CCC)S(=O)(=O)c1ccc(cc1)C(=O)O	IC50	=	Not Active	-1	MAP kinase ERK1	Sub-train	-1	0.998622	0.00137812	In
Cpd0905	CHEMBL434063	CN(CCOc1ccc(C[C@H](Nc2ccccc2C(=O)c3ccccc3)C(=O)O)cc1)c4ccccn4	IC50	=	Not Active	-1	MAP kinase ERK1	Sub-train	1	0.0324048	0.967595	In
Cpd0906	CHEMBL715	CN1CCN(CC1)C2=Nc3ccccc3Nc4sc(C)cc24	IC50	=	Not Active	-1	MAP kinase ERK1	Sub-train	-1	0.998263	0.00173726	In
Cpd0907	CHEMBL340978	CC(C(=O)O)c1ccc2oc(nc2c1)c3ccc(Cl)cc3	IC50	=	Not Active	-1	MAP kinase ERK1	Sub-train	-1	0.81646	0.18354	In
Cpd0908	CHEMBL660	NC12CC3CC(CC(C3)C1)C2	IC50	=	Not Active	-1	MAP kinase ERK1	Sub-train	-1	0.998998	0.00100177	In
Cpd0909	CHEMBL1282	CC(C)Cn1cnc2c(N)nc3ccccc3c12	IC50	=	Not Active	-1	MAP kinase ERK1	Sub-train	-1	0.964177	0.035823	In
Cpd0911	CHEMBL1276308	CC#C[C@]1(O)CC[C@H]2[C@@H]3CCC4=CC(=O)CCC4=C3[C@H](C[C@]12C)c5ccc(cc5)N(C)C	IC50	=	Not Active	-1	MAP kinase ERK1	Sub-train	-1	0.96783	0.0321702	In
Cpd0914	CHEMBL599	CN1C(=C(O)c2ccccc2S1(=O)=O)C(=O)Nc3ncc(C)s3	IC50	=	Not Active	-1	MAP kinase ERK1	Test	-1	0.980205	0.0197948	In
Cpd0916	CHEMBL103667	Cc1ccc(cc1)n2nc(cc2NC(=O)Nc3ccc(OCCN4CCOCC4)c5ccccc35)C(C)(C)C	IC50	>	30000	-1	MAP kinase ERK1	Sub-train	1	0.12055	0.87945	In
Cpd0919	CHEMBL64391	CCC(C)N1N=CN(C1=O)c2ccc(cc2)N3CCN(CC3)c4ccc(OCC5COC(Cn6cncn6)(O5)c7ccc(Cl)cc7Cl)cc4	IC50	=	Not Active	-1	MAP kinase ERK1	Sub-train	1	0.0821044	0.917896	In
Cpd0921	CHEMBL499	CC(C)(C)NC[C@H](O)COc1nsnc1N2CCOCC2	IC50	=	Not Active	-1	MAP kinase ERK1	Sub-train	-1	0.858741	0.141259	In
Cpd0923	CHEMBL941	CN1CCN(Cc2ccc(cc2)C(=O)Nc3ccc(C)c(Nc4nccc(n4)c5cccnc5)c3)CC1	IC50	=	Not Active	-1	MAP kinase ERK1	Sub-train	1	0.0214712	0.978529	In
Cpd0924	CHEMBL504760	CC1(C)[C@@H]2CC[C@@]1(C)C(=O)C2	IC50	=	Not Active	-1	MAP kinase ERK1	Sub-train	-1	0.998406	0.00159392	In
Cpd0925	CHEMBL1403281	CC(C)C[C@@H]1N2C(=O)[C@](NC(=O)[C@H]3CN(C)[C@@H]4Cc5c[nH]c6cccc(C4=C3)c56)(O[C@@]2(O)[C@@H]7CCCN7C1=O)C(C)C	IC50	=	Not Active	-1	MAP kinase ERK1	Sub-train	-1	0.984378	0.0156225	In
Cpd0927	CHEMBL696	CCC1(C)CC(=O)NC1=O	IC50	=	Not Active	-1	MAP kinase ERK1	Sub-train	-1	0.999166	0.000834164	In
Cpd0929	CHEMBL407135	CCC(C)CCCC(=O)N[C@@H](CCN)C(=O)N[C@@H]([C@@H](C)O)C(=O)N[C@@H](CCN)C(=O)N[C@H]1CCNC(=O)[C@@H](NC(=O)[C@H](CCN)NC(=O)[C@H](CCN)NC(=O)[C@H](CC(C)C)NC(=O)[C@@H](CC(C)C)NC(=O)[C@H](CCN)NC1=O)[C@H](C)O	IC50	=	Not Active	-1	MAP kinase ERK1	Sub-train	-1	0.994215	0.00578544	Outlier
Cpd0930	CHEMBL1544	N[C@@H](Cc1cc(I)c(Oc2ccc(O)c(I)c2)c(I)c1)C(=O)O	IC50	=	Not Active	-1	MAP kinase ERK1	Sub-train	-1	0.998372	0.00162801	In
Cpd0932	CHEMBL428647	CC(=O)O[C@H]1C(=O)[C@]2(C)[C@@H](O)C[C@H]3OC[C@@]3(OC(=O)C)[C@H]2[C@H](OC(=O)c4ccccc4)[C@]5(O)C[C@H](OC(=O)[C@H](O)[C@@H](NC(=O)c6ccccc6)c7ccccc7)C(=C1C5(C)C)C	IC50	=	Not Active	-1	MAP kinase ERK1	Sub-train	-1	0.841841	0.158159	In
Cpd0933	CHEMBL447	CCCC(C)C1(CC=C)C(=O)NC(=O)NC1=O	IC50	=	Not Active	-1	MAP kinase ERK1	Sub-train	-1	0.999673	0.000327334	In
Cpd0935	CHEMBL33	C[C@H]1COc2c(N3CCN(C)CC3)c(F)cc4C(=O)C(=CN1c24)C(=O)O	IC50	=	Not Active	-1	MAP kinase ERK1	Sub-train	-1	0.998902	0.00109777	In
Cpd0936	CHEMBL404939	ClC1=C(N2C(=O)CCC2=O)C(=O)c3ccccc3C1=O	IC50	=	82900	-1	MAP kinase ERK1	Test	-1	0.997812	0.002188	In
Cpd0937	CHEMBL633	CCCCc1oc2ccccc2c1C(=O)c3cc(I)c(OCCN(CC)CC)c(I)c3	IC50	=	Not Active	-1	MAP kinase ERK1	Test	-1	0.998083	0.0019173	In
Cpd0938	CHEMBL296419	COc1ccc(CCN2CCC(CC2)Nc3nc4ccccc4n3Cc5ccc(F)cc5)cc1	IC50	=	Not Active	-1	MAP kinase ERK1	Sub-train	1	0.40864	0.59136	In
Cpd0939	CHEMBL88	ClCCN(CCCl)P1(=O)NCCCO1	IC50	=	Not Active	-1	MAP kinase ERK1	Sub-train	-1	0.784106	0.215894	Outlier
Cpd0941	CHEMBL122	CS(=O)(=O)c1ccc(cc1)C2=C(C(=O)OC2)c3ccccc3	IC50	=	Not Active	-1	MAP kinase ERK1	Sub-train	1	0.283992	0.716008	In
Cpd0942	CHEMBL417	COc1cccc2C(=O)c3c(O)c4C[C@](O)(C[C@H](O[C@H]5C[C@H](N)[C@@H](O)[C@H](C)O5)c4c(O)c3C(=O)c12)C(=O)CO	IC50	=	Not Active	-1	MAP kinase ERK1	Sub-train	-1	0.898947	0.101053	In
Cpd0943	CHEMBL564201	OC[C@H]1O[C@H]([C@H](O)[C@@H]1O)N2N=CC(=O)NC2=O	IC50	=	Not Active	-1	MAP kinase ERK1	Sub-train	-1	0.990019	0.00998149	In
Cpd0947	CHEMBL53463	COc1cccc2C(=O)c3c(O)c4C[C@](O)(C[C@H](O[C@H]5C[C@H](N)[C@H](O)[C@H](C)O5)c4c(O)c3C(=O)c12)C(=O)CO	IC50	=	Not Active	-1	MAP kinase ERK1	Sub-train	-1	0.898947	0.101053	In
Cpd0948	CHEMBL81	Oc1ccc(cc1)c2sc3cc(O)ccc3c2C(=O)c4ccc(OCCN5CCCCC5)cc4	IC50	=	Not Active	-1	MAP kinase ERK1	Sub-train	-1	0.962643	0.0373568	In
Cpd0949	CHEMBL567597	C[C@@H]1CC[C@H]2[C@@H](C)C(=O)O[C@@H]3O[C@]4(C)CC[C@@H]1[C@@]23OO4	IC50	=	Not Active	-1	MAP kinase ERK1	Sub-train	-1	0.997363	0.00263711	In
Cpd0951	CHEMBL262777	CN[C@H](CC(C)C)C(=O)N[C@@H]1[C@H](O)c2ccc(Oc3cc4cc(Oc5ccc(cc5Cl)[C@@H](O)[C@@H]6NC(=O)[C@H](NC(=O)[C@@H]4NC(=O)[C@H](CC(=O)N)NC1=O)c7ccc(O)c(c7)c8c(O)cc(O)cc8[C@H](NC6=O)C(=O)O)c3O[C@@H]9O[C@H](CO)[C@@H](O)[C@H](O)[C@H]9O[C@H]%10C[C@](C)(N)[C@H](O)[C@H](C)O%10)c(Cl)c2	IC50	=	Not Active	-1	MAP kinase ERK1	Test	1	0.0708477	0.929152	In
Cpd0952	CHEMBL98350	O=C1C=C(Oc2c1cccc2c3ccccc3)N4CCOCC4	IC50	=	Not Active	-1	MAP kinase ERK1	Sub-train	-1	0.934672	0.0653281	In
Cpd0953	CHEMBL109	CCCC(CCC)C(=O)O	IC50	=	Not Active	-1	MAP kinase ERK1	Test	-1	0.998674	0.00132573	In
Cpd0958	CHEMBL44	Oc1ccc(cc1)C2=COc3cc(O)cc(O)c3C2=O	IC50	=	Not Active	-1	MAP kinase ERK1	Sub-train	-1	0.93664	0.0633595	In
Cpd0959	CHEMBL116	CC(C)CN(C[C@@H](O)[C@H](Cc1ccccc1)NC(=O)O[C@H]2CCOC2)S(=O)(=O)c3ccc(N)cc3	IC50	=	Not Active	-1	MAP kinase ERK1	Test	-1	0.997153	0.00284656	Outside-AD
Cpd0961	CHEMBL625	c1ccc2[nH]c(nc2c1)c3cscn3	IC50	=	Not Active	-1	MAP kinase ERK1	Test	-1	0.984043	0.0159571	In
Cpd0963	CHEMBL185	FC1=CNC(=O)NC1=O	IC50	=	Not Active	-1	MAP kinase ERK1	Sub-train	-1	0.998601	0.00139872	In
Cpd0972	CHEMBL1208572	CC[C@H]([C@H]1CC[C@H](C)[C@@H](O1)[C@@H](C)[C@H](O)[C@H](C)C(=O)[C@H](CC)[C@H]2O[C@@]3(O[C@@]4(CC[C@](C)(O4)[C@H]5CC[C@](O)(CC)[C@H](C)O5)[C@H](O)C=C3)[C@H](C)C[C@@H]2C)C(=O)O	IC50	=	Not Active	-1	MAP kinase ERK1	Sub-train	-1	0.996871	0.00312852	In
Cpd0975	CHEMBL406375	o1c2ccccc2c3[nH]nc(c4ccccc4)c13	IC50	>=	10000	-1	MAP kinase ERK1	Sub-train	-1	0.726137	0.273863	In
Cpd0977	CHEMBL372795	CN[C@H]1[C@H](O)[C@@H](O)[C@H](CO)O[C@H]1O[C@H]2[C@H](O[C@H]3[C@H](O)[C@@H](O)[C@H](N=C(N)N)[C@@H](O)[C@@H]3N=C(N)N)O[C@@H](C)[C@]2(O)C=O	IC50	=	Not Active	-1	MAP kinase ERK1	Sub-train	-1	0.964964	0.0350361	In
Cpd0978	CHEMBL1381098	S=C=Nc1cccc2ccccc12	IC50	=	Not Active	-1	MAP kinase ERK1	Test	-1	0.98116	0.0188399	In
Cpd0984	CHEMBL1481	CCC1=C(C)CN(C(=O)NCCc2ccc(cc2)S(=O)(=O)NC(=O)N[C@@H]3CC[C@@H](C)CC3)C1=O	IC50	=	Not Active	-1	MAP kinase ERK1	Sub-train	-1	0.97723	0.0227696	In
Cpd0987	CHEMBL26	CCN1CCCC1CNC(=O)c2cc(ccc2OC)S(=O)(=O)N	IC50	=	Not Active	-1	MAP kinase ERK1	Sub-train	-1	0.699727	0.300273	In
Cpd0990	CHEMBL773	NCC(=O)O	IC50	=	Not Active	-1	MAP kinase ERK1	Sub-train	-1	0.999422	0.000577664	Outlier
Cpd0992	CHEMBL129	CC1=CN([C@H]2C[C@H](N=[N+]=[N-])[C@@H](CO)O2)C(=O)NC1=O	IC50	=	Not Active	-1	MAP kinase ERK1	Sub-train	-1	0.997421	0.00257874	In
Cpd1003	CHEMBL137	Cc1ncc([N+](=O)[O-])n1CCO	IC50	=	Not Active	-1	MAP kinase ERK1	Sub-train	-1	0.996435	0.00356505	In
Cpd1004	CHEMBL446	Cc1cc(C)nc(NS(=O)(=O)c2ccc(N)cc2)n1	IC50	=	Not Active	-1	MAP kinase ERK1	Sub-train	-1	0.964629	0.0353711	In
Cpd1008	CHEMBL476	CN(C)\N=N\c1[nH]cnc1C(=O)N	IC50	=	Not Active	-1	MAP kinase ERK1	Test	-1	0.984448	0.0155518	In
Cpd1014	CHEMBL991	CC1=CN([C@@H]2O[C@H](CO)C=C2)C(=O)NC1=O	IC50	=	Not Active	-1	MAP kinase ERK1	Test	-1	0.9928	0.00719989	In
Cpd1015	CHEMBL741	Nc1nnc(c(N)n1)c2cccc(Cl)c2Cl	IC50	=	Not Active	-1	MAP kinase ERK1	Test	-1	0.972588	0.027412	In
Cpd1017	CHEMBL1753	CCC[C@@H]1C[C@H](N(C)C1)C(=O)N[C@H]([C@H](C)Cl)[C@H]2O[C@H](SC)[C@H](O)[C@@H](O)[C@H]2O	IC50	=	Not Active	-1	MAP kinase ERK1	Sub-train	-1	0.994831	0.00516923	In
Cpd1018	CHEMBL865	Cc1onc(c2ccccc2)c1c3ccc(cc3)S(=O)(=O)N	IC50	=	Not Active	-1	MAP kinase ERK1	Sub-train	1	0.262259	0.737741	In
Cpd1024	CHEMBL141	NC1=NC(=O)N(C=C1)[C@@H]2CS[C@H](CO)O2	IC50	=	Not Active	-1	MAP kinase ERK1	Sub-train	-1	0.985403	0.0145969	In
Cpd1025	CHEMBL35	NS(=O)(=O)c1cc(C(=O)O)c(NCc2occc2)cc1Cl	IC50	=	Not Active	-1	MAP kinase ERK1	Test	-1	0.788788	0.211212	In
Cpd1026	CHEMBL1741	CC[C@H]1OC(=O)[C@H](C)[C@@H](O[C@H]2C[C@@](C)(OC)[C@@H](O)[C@H](C)O2)[C@H](C)[C@@H](O[C@@H]3O[C@H](C)C[C@@H]([C@H]3O)N(C)C)[C@@](C)(C[C@@H](C)C(=O)[C@H](C)[C@@H](O)[C@]1(C)O)OC	IC50	=	Not Active	-1	MAP kinase ERK1	Sub-train	-1	0.998943	0.0010571	In
Cpd1032	CHEMBL54	OC1(CCN(CCCC(=O)c2ccc(F)cc2)CC1)c3ccc(Cl)cc3	IC50	=	Not Active	-1	MAP kinase ERK1	Sub-train	-1	0.72514	0.27486	In
Cpd1037	CHEMBL1384	NC[C@H]1O[C@H](O[C@@H]2[C@@H](N)C[C@@H](N)[C@H](O[C@H]3O[C@H](CO)[C@@H](O)[C@H](N)[C@H]3O)[C@H]2O)[C@H](O)[C@@H](O)[C@@H]1O	IC50	=	Not Active	-1	MAP kinase ERK1	Sub-train	-1	0.980128	0.0198716	In
Cpd1038	CHEMBL558	CC(N)COc1c(C)cccc1C	IC50	=	Not Active	-1	MAP kinase ERK1	Sub-train	-1	0.992654	0.00734595	In
Cpd1040	CHEMBL267345	C[C@@H]1OC(=O)C[C@H](O)C[C@H](O)CC[C@@H](O)[C@H](O)C[C@H](O)C[C@]2(O)C[C@H](O)[C@H]([C@H](C[C@@H](O[C@@H]3O[C@H](C)[C@@H](O)[C@H](N)[C@@H]3O)\C=C\C=C\C=C\C=C\C=C\C=C\C=C\[C@H](C)[C@@H](O)[C@H]1C)O2)C(=O)O	IC50	=	Not Active	-1	MAP kinase ERK1	Sub-train	-1	0.521913	0.478087	In
Cpd1041	CHEMBL504	C[S+](C)[O-]	IC50	=	Not Active	-1	MAP kinase ERK1	Sub-train	-1	0.999961	3.85467e-05	In
Cpd1042	CHEMBL7002	CC1(COc2ccc(CC3SC(=O)NC3=O)cc2)CCCCC1	IC50	=	Not Active	-1	MAP kinase ERK1	Sub-train	-1	0.854746	0.145254	In
Cpd1044	CHEMBL135	C[C@]12CC[C@H]3[C@@H](CCc4cc(O)ccc34)[C@@H]1CC[C@@H]2O	IC50	=	Not Active	-1	MAP kinase ERK1	Sub-train	-1	0.990667	0.00933325	In
Cpd1047	CHEMBL488	CCC1(CCC(=O)NC1=O)c2ccc(N)cc2	IC50	=	Not Active	-1	MAP kinase ERK1	Sub-train	-1	0.996182	0.00381774	In
Cpd1050	CHEMBL529	CC[C@H]1OC(=O)[C@H](C)[C@@H](O[C@H]2C[C@@](C)(OC)[C@@H](O)[C@H](C)O2)[C@H](C)[C@@H](O[C@@H]3O[C@H](C)C[C@@H]([C@H]3O)N(C)C)[C@](C)(O)C[C@@H](C)CN(C)[C@H](C)[C@@H](O)[C@]1(C)O	IC50	=	Not Active	-1	MAP kinase ERK1	Sub-train	-1	0.999301	0.000698846	Outlier
Cpd1053	CHEMBL1444	N#Cc1ccc(cc1)C(c2ccc(cc2)C#N)n3cncn3	IC50	=	Not Active	-1	MAP kinase ERK1	Sub-train	-1	0.857742	0.142258	In
Cpd1054	CHEMBL1572	CCN[C@@H]1C[C@H](N)[C@@H](O[C@H]2OC(=CC[C@H]2N)CN)[C@H](O)[C@H]1O[C@H]3OC[C@](C)(O)[C@H](NC)[C@H]3O	IC50	=	Not Active	-1	MAP kinase ERK1	Sub-train	-1	0.987816	0.0121835	In
Cpd1055	CHEMBL27	CC(C)NCC(O)COc1cccc2ccccc12	IC50	=	Not Active	-1	MAP kinase ERK1	Sub-train	-1	0.983617	0.0163833	In
Cpd1057	CHEMBL101	CCCCC1C(=O)N(N(C1=O)c2ccccc2)c3ccccc3	IC50	=	Not Active	-1	MAP kinase ERK1	Sub-train	-1	0.963933	0.0360667	In
Cpd1058	CHEMBL545	CCO	IC50	=	Not Active	-1	MAP kinase ERK1	Sub-train	-1	0.999907	9.31149e-05	Outlier
Cpd1059	CHEMBL29	CC1(C)S[C@@H]2[C@H](NC(=O)Cc3ccccc3)C(=O)N2[C@H]1C(=O)O	IC50	=	Not Active	-1	MAP kinase ERK1	Sub-train	-1	0.986874	0.013126	In
Cpd1060	CHEMBL233794	O=C(Nc1sc2N(CCCc2c1C#N)S(=O)(=O)c3ccccc3)c4cccc5ccccc45	IC50	>	10000	-1	MAP kinase ERK2	Sub-train	-1	0.902872	0.097128	Outlier
Cpd1064	CHEMBL77155	CC(C)n1cnc2c(NCC=C(C)C)nc(N)nc12	IC50	=	50000	-1	MAP kinase ERK2	Test	-1	0.957365	0.0426355	In
Cpd1065	CHEMBL228043	C\C(=C(/C#N)\C(=O)Nc1cc(Br)ccc1Br)\O	IC50	>	500000	-1	MAP kinase ERK2	Sub-train	-1	0.997679	0.00232113	In
Cpd1067	CHEMBL597754	CNC(=O)c1nn(C)c2c1CCc3cnc(NC4CCN(CC4)C(=O)C5CCN(CC5)S(=O)(=O)C)nc23	IC50	=	622	-1	MAP kinase ERK2	Test	-1	0.913033	0.0869667	In
Cpd1073	CHEMBL370379	Cn1nc(N)c2cc(nnc12)c3c(nn4ccccc34)c5ccccc5	IC50	=	1400	-1	MAP kinase ERK2	Sub-train	-1	0.903894	0.0961059	In
Cpd1078	CHEMBL1159650	CCC(=O)O[C@@]1([C@@H](C)C[C@H]2[C@@H]3CCC4=CC(=O)C=C[C@]4(C)[C@@]3(F)[C@@H](O)C[C@]12C)C(=O)CCl	IC50	=	Not Active	-1	MAP kinase ERK2	Test	-1	0.981189	0.018811	In
Cpd1079	CHEMBL1727	CC1=C(N2[C@H](SC1)[C@H](NC(=O)[C@H](N)c3ccccc3)C2=O)C(=O)O	IC50	=	Not Active	-1	MAP kinase ERK2	Sub-train	-1	0.965127	0.0348727	In
Cpd1111	CHEMBL1902627	CC(C)NCC(O)c1ccccc1Cl	IC50	=	Not Active	-1	MAP kinase ERK2	Sub-train	-1	0.996812	0.0031876	In
Cpd1112	CHEMBL2312645	COc1ccccc1CNc2ncc(C(=O)NC3CCN(C)CC3)c(NC4CCCC4)n2	IC50	=	30000	-1	MAP kinase ERK2	Sub-train	-1	0.563081	0.436919	In
Cpd1130	CHEMBL1644618	O=C1NN=C(N1c2ccc3ccccc3c2)c4ccnc(Nc5ccccc5)c4	IC50	>	50000	-1	MAP kinase ERK2	Sub-train	1	0.0121908	0.987809	In
Cpd1131	CHEMBL1644631	O=C(Nc1cc(ccn1)C2=NNC(=O)N2c3ccc4ccccc4c3)c5ccccc5	IC50	>	50000	-1	MAP kinase ERK2	Sub-train	1	0.0135197	0.98648	In
Cpd1142	CHEMBL437943	CC1CNC(=O)c2[nH]c3ccc(cc3c12)C(=O)Nc4cccnc4	IC50	=	210	1	MAP kinase ERK2	Sub-train	-1	0.641989	0.358011	In
Cpd1143	CHEMBL245884	CC1CNC(=O)c2[nH]c3ccc(cc3c12)C(=O)Nc4nc(cs4)C(=O)NCCN(C)C	IC50	=	1900	-1	MAP kinase ERK2	Sub-train	-1	0.980035	0.0199654	In
Cpd1148	CHEMBL359106	NC1=N\C(=C\2/CCNC(=O)c3[nH]c(Br)cc23)\C(=O)N1	IC50	=	6	1	MAP kinase ERK2	Sub-train	-1	0.99856	0.0014402	In
Cpd1149	CHEMBL1650533	Cl.CCN(Cc1cc(Nc2nc(C)cn3c(cnc23)c4cn[nH]c4)sn1)C(C)(C)CO	IC50	>	100	-1	MAP kinase ERK2	Sub-train	-1	0.623283	0.376717	In
Cpd1150	CHEMBL157548	CN1C[C@@H]2C[C@H]1CN2c3cc4N(C=C(C(=O)O)C(=O)c4cc3F)C5CC5	IC50	=	Not Active	-1	MAP kinase ERK2	Sub-train	-1	0.99096	0.00904044	In
Cpd1151	CHEMBL257834	CC(C)(C)CN1CCC(CC1)NC(=O)c2csc(NC(=O)c3ccc4cc5C(=O)NCC6(CCC6)n5c4c3)n2	IC50	>	3000	-1	MAP kinase ERK2	Sub-train	-1	0.978773	0.0212275	In
Cpd1152	CHEMBL1682010	Cc1csc(NC(=O)Cc2cccc3ncccc23)c1c4nc(C)n[nH]4	IC50	>	50000	-1	MAP kinase ERK2	Sub-train	-1	0.900572	0.0994282	In
Cpd1153	CHEMBL1682012	Cc1n[nH]c(n1)c2c(C)csc2NC(=O)CN3C(=O)CCc4ccccc34	IC50	>	50000	-1	MAP kinase ERK2	Sub-train	-1	0.917613	0.0823873	In
Cpd1154	CHEMBL1682014	Clc1csc(NC(=O)CN2C(=O)CCc3ccccc23)c1c4ncn[nH]4	IC50	>	50000	-1	MAP kinase ERK2	Test	-1	0.947987	0.0520125	In
Cpd1155	CHEMBL1682016	Brc1csc(NC(=O)Cc2cccc3cnccc23)c1c4ncn[nH]4	IC50	>	50000	-1	MAP kinase ERK2	Test	-1	0.933042	0.0669577	In
Cpd1158	CHEMBL1201024	[Br-].C[N+]1(C)[C@H]2C[C@@H](C[C@H]1[C@H]3O[C@@H]23)OC(=O)[C@H](CO)c4ccccc4	IC50	=	Not Active	-1	MAP kinase ERK2	Sub-train	-1	0.959345	0.0406546	In
Cpd1159	CHEMBL13	COCCc1ccc(OCC(O)CNC(C)C)cc1	IC50	=	Not Active	-1	MAP kinase ERK2	Sub-train	-1	0.961103	0.0388971	In
Cpd1160	CHEMBL1276308	CC#C[C@]1(O)CC[C@H]2[C@@H]3CCC4=CC(=O)CCC4=C3[C@H](C[C@]12C)c5ccc(cc5)N(C)C	IC50	=	Not Active	-1	MAP kinase ERK2	Sub-train	-1	0.958844	0.0411563	In
Cpd1162	CHEMBL406	CC1Cc2ccccc2N1NC(=O)c3ccc(Cl)c(c3)S(=O)(=O)N	IC50	=	Not Active	-1	MAP kinase ERK2	Sub-train	-1	0.846511	0.153489	In
Cpd1163	CHEMBL1201151	COc1ccc2[C@H]3CC[C@@]4(C)[C@@H](CC[C@@]4(O)C#C)[C@@H]3CCc2c1	IC50	=	Not Active	-1	MAP kinase ERK2	Sub-train	-1	0.976114	0.0238859	In
Cpd1164	CHEMBL1682007	Cc1csc(NC(=O)Cc2ccc(cc2)c3ccncc3)c1c4nc(C)n[nH]4	IC50	>	5000	-1	MAP kinase ERK2	Sub-train	-1	0.787792	0.212208	In
Cpd1167	CHEMBL1822146	FC(F)(F)c1ccc2N(CC(=O)Nc3scc(Br)c3c4ncn[nH]4)C(=O)C=Cc2c1	IC50	>	50000	-1	MAP kinase ERK2	Sub-train	-1	0.918524	0.0814761	In
Cpd1168	CHEMBL1644623	O=C1NN=C(N1c2ccc3ccccc3c2)c4ccnc(NC5CC5)c4	IC50	>	50000	-1	MAP kinase ERK2	Test	1	0.0418866	0.958113	In
Cpd1169	CHEMBL1644629	CC(=O)Nc1cc(ccn1)C2=NNC(=O)N2c3ccc4ccccc4c3	IC50	>	50000	-1	MAP kinase ERK2	Sub-train	1	0.0813515	0.918648	In
Cpd1170	CHEMBL1477	COCc1c(nc(C(C)C)c(\C=C\[C@@H](O)C[C@@H](O)CC(=O)O)c1c2ccc(F)cc2)C(C)C	IC50	=	Not Active	-1	MAP kinase ERK2	Sub-train	-1	0.975563	0.0244372	In
Cpd1173	CHEMBL246089	CC1CNC(=O)c2[nH]c3ccc(cc3c12)C(=O)Nc4nc(cs4)C(=O)NCC(=O)N	IC50	=	1500	-1	MAP kinase ERK2	Test	-1	0.965014	0.034986	In
Cpd1174	CHEMBL246088	CC1CNC(=O)c2[nH]c3ccc(cc3c12)C(=O)Nc4nc(cs4)C(=O)NCCCN(C)C	IC50	=	1300	-1	MAP kinase ERK2	Sub-train	-1	0.989763	0.0102367	In
Cpd1175	CHEMBL1752	CN1C(=O)N(C)c2ncn(CC(O)CO)c2C1=O	IC50	=	Not Active	-1	MAP kinase ERK2	Sub-train	-1	0.998457	0.00154322	In
Cpd1176	CHEMBL557555	CC(C)(Oc1ccc(cc1)C2CC2(Cl)Cl)C(=O)O	IC50	=	Not Active	-1	MAP kinase ERK2	Sub-train	-1	0.94099	0.0590101	In
Cpd1177	CHEMBL234926	OCC=C	IC50	=	Not Active	-1	MAP kinase ERK2	Test	-1	0.99926	0.000739597	In
Cpd1179	CHEMBL1235242	N[C@@H](Cc1ccc(F)cc1)C(=O)O	IC50	=	Not Active	-1	MAP kinase ERK2	Sub-train	-1	0.953535	0.0464647	In
Cpd1181	CHEMBL487153	COc1cc(\C=C\2/SC(=S)N(Cc3ccccc3)C2=O)ccc1O	IC50	=	14300	-1	MAP kinase ERK2	Sub-train	-1	0.987122	0.012878	In
Cpd1182	CHEMBL35482	COc1cccc(C2=CC(=O)c3ccccc3O2)c1N	IC50	=	2800	-1	MAP kinase ERK2	Sub-train	-1	0.933098	0.0669023	In
Cpd1187	CHEMBL207815	COCCN1CC(C1)(N(C)Cc2cc3c(Nc4cccc(Cl)c4F)ncnc3cc2OC)C(=O)N	IC50	>	10000	-1	MAP kinase ERK2	Sub-train	-1	0.654638	0.345362	In
Cpd1189	CHEMBL508102	CCOC(=O)N1C=CN(C)C1=S	IC50	=	Not Active	-1	MAP kinase ERK2	Sub-train	-1	0.996266	0.00373361	In
Cpd1190	CHEMBL215652	CC(C)c1nnc2ccc(cn12)c3ocnc3c4ccc(F)cc4Cl	IC50	>	10000	-1	MAP kinase ERK2	Sub-train	-1	0.593989	0.406011	In
Cpd1191	CHEMBL3318031	COc1cc(ccc1O)c2cnc3c(NC(=O)NC(C)(C)C)ccnc3c2	IC50	>	100000	-1	MAP kinase ERK2	Sub-train	1	0.105125	0.894875	In
Cpd1193	CHEMBL1644635	Fc1cccc2ccc(cc12)N3C(=O)NN=C3c4ccnc(NC5CCOCC5)c4	IC50	>	50000	-1	MAP kinase ERK2	Test	1	0.0498783	0.950122	In
Cpd1194	CHEMBL1644615	O=C1N(Cc2ccccn2)N=C(N1c3ccc4ccccc4c3)c5ccnc(NC6CCOCC6)c5	IC50	>	50000	-1	MAP kinase ERK2	Sub-train	1	0.0441043	0.955896	In
Cpd1196	CHEMBL3356117	CC(=O)c1ccc(cc1)N2CCN(CC2)C(=O)CN3CC[C@H](C3)C(=O)Nc4ccc(O)c(Cl)c4	IC50	=	50	1	MAP kinase ERK2	Sub-train	-1	0.637136	0.362864	In
Cpd1200	CHEMBL380006	COc1cc2ncnc(Nc3cccc(Cl)c3F)c2cc1CN(C)[C@H](C)C(=O)N(C)C	IC50	>	10000	-1	MAP kinase ERK2	Sub-train	-1	0.803042	0.196958	In
Cpd1201	CHEMBL207235	CO[C@@H]1C[C@@H](N(Cc2cc3c(Nc4cccc(Cl)c4F)ncnc3cc2OC)C1)C(=O)N	IC50	>	10000	-1	MAP kinase ERK2	Test	1	0.458402	0.541598	In
Cpd1205	CHEMBL3398609	CC(=O)c1ccc(cc1)N2CCN(CC2)C(=O)CN3CC[C@H](C3)C(=O)Nc4ccc(O)cc4	IC50	=	6000	-1	MAP kinase ERK2	Sub-train	-1	0.720453	0.279547	In
Cpd1206	CHEMBL425601	COc1cc2ncnc(Nc3cccc(Cl)c3F)c2cc1CN(C)C4(CN(C4)C(C)C)C(=O)N	IC50	>	10000	-1	MAP kinase ERK2	Sub-train	-1	0.629624	0.370376	In
Cpd1207	CHEMBL207037	COc1cc2ncnc(Nc3cccc(Cl)c3F)c2cc1CN4CC(C4)C(=O)N	IC50	>	10000	-1	MAP kinase ERK2	Sub-train	-1	0.684404	0.315596	In
Cpd1208	CHEMBL232599	O=C(CCN1CCCCC1)N2CCc3c(C2)sc(NC(=O)c4cccc5ccccc45)c3C#N	IC50	>	10000	-1	MAP kinase ERK2	Sub-train	-1	0.979653	0.0203468	In
Cpd1217	CHEMBL99203	Nc1ncnc2c1c(I)cn2[C@@H]3O[C@H](CO)[C@@H](O)[C@H]3O	IC50	=	1200	-1	MAP kinase ERK2	Test	-1	0.993015	0.00698459	In
Cpd1219	CHEMBL1945559	Cn1c2C(=O)NC3(CCNCC3)C(C#N)c2c4ccc(Cl)c(Cl)c14	IC50	>	10000	-1	MAP kinase ERK2	Sub-train	-1	0.998355	0.00164548	In
Cpd1220	CHEMBL2420909	C1CCC2(CCN(CC2)c3ncnc4[nH]cnc34)NC1	IC50	=	47000	-1	MAP kinase ERK2	Sub-train	-1	0.917524	0.0824763	In
Cpd1221	CHEMBL1255837	CC(C)[C@@]1(NC(=O)[C@@H]2C[C@H]3[C@@H](Cc4c[nH]c5cccc3c45)N(C)C2)O[C@@]6(O)[C@@H]7CCCN7C(=O)[C@H](Cc8ccccc8)N6C1=O.CS(=O)(=O)O	IC50	=	Not Active	-1	MAP kinase ERK2	Sub-train	-1	0.82366	0.17634	In
Cpd1223	CHEMBL1766	C[C@@H]1C[C@H]2[C@@H]3CCC4=CC(=O)C=C[C@]4(C)[C@@]3(F)[C@@H](O)C[C@]2(C)[C@H]1C(=O)CO	IC50	=	Not Active	-1	MAP kinase ERK2	Test	-1	0.989427	0.0105732	In
Cpd1224	CHEMBL56367	CS(=O)(=O)Nc1ccc(cc1Oc2ccccc2)[N+](=O)[O-]	IC50	=	Not Active	-1	MAP kinase ERK2	Sub-train	-1	0.942702	0.0572981	In
Cpd1225	CHEMBL438485	O[C@@H]1CC[C@H](CC1)NC(=O)c2ccc3c(Cc4c(n[nH]c34)c5ccc(cc5)c6ccc(O)cc6)c2	IC50	>	50000	-1	MAP kinase ERK2	Sub-train	1	0.00680501	0.993195	In
Cpd1228	CHEMBL212968	CC(C)(C)c1nnc2ccc(cn12)c3ocnc3c4cc(F)c(F)cc4F	IC50	>	10000	-1	MAP kinase ERK2	Sub-train	-1	0.680207	0.319793	In
Cpd1229	CHEMBL205596	C[C@H](CCC(=O)O)[C@H]1CC[C@H]2[C@@H]3[C@H](O)C[C@@H]4C[C@H](O)CC[C@]4(C)[C@H]3C[C@H](O)[C@]12C	IC50	=	Not Active	-1	MAP kinase ERK2	Sub-train	-1	0.995916	0.00408398	In
Cpd1230	CHEMBL219916	Clc1ccc2N(C3CCN(CCCN4C(=O)Nc5ccccc45)CC3)C(=O)Nc2c1	IC50	=	Not Active	-1	MAP kinase ERK2	Test	-1	0.625005	0.374995	In
Cpd1232	CHEMBL1644646	COC(=O)N1CCC(CC1)N2N=C(N(C2=O)c3ccc4ccccc4c3)c5ccnc(NC6CCOCC6)c5	IC50	>	5000	-1	MAP kinase ERK2	Sub-train	-1	0.693781	0.306219	Outlier
Cpd1234	CHEMBL1644620	O=C1NN=C(N1c2ccc3ccccc3c2)c4ccnc(NC5CCOCC5)c4	IC50	>	50000	-1	MAP kinase ERK2	Sub-train	1	0.0507305	0.94927	In
Cpd1235	CHEMBL1644622	O=C1NN=C(N1c2ccc3ccccc3c2)c4ccnc(NC5CCC5)c4	IC50	>	50000	-1	MAP kinase ERK2	Sub-train	1	0.0380111	0.961989	In
Cpd1238	CHEMBL1644639	O=C1N(N=C(N1c2ccc3ccccc3c2)c4ccnc(NC5CCCCC5)c4)C6CCOCC6	IC50	>	50000	-1	MAP kinase ERK2	Sub-train	1	0.182161	0.817839	In
Cpd1239	CHEMBL378963	N[C@H](COc1cnc(Cl)c(c1)c2ccc3cnccc3c2)Cc4c[nH]c5ccccc45	IC50	=	37000	-1	MAP kinase ERK2	Sub-train	1	0.197262	0.802738	In
Cpd1240	CHEMBL437885	COc1cc2ncnc(Nc3cccc(Cl)c3F)c2cc1CN4CCCC4	IC50	>	10000	-1	MAP kinase ERK2	Sub-train	-1	0.804699	0.195301	In
Cpd1241	CHEMBL3310151	CN1CCN(CC1)c2cc(F)c3c(c2)nc(Cc4ccc5OCOc5c4)n6nc(N)nc36	IC50	>	10000	-1	MAP kinase ERK2	Test	-1	0.674349	0.325651	In
Cpd1242	CHEMBL3309990	Nc1nc2c3c(F)cccc3nc(Cc4ccc5OCOc5c4)n2n1	IC50	>	10000	-1	MAP kinase ERK2	Sub-train	-1	0.651304	0.348696	In
Cpd1244	CHEMBL110691	CC(=O)O[C@@]1(CC[C@H]2[C@@H]3C=C(Cl)C4=CC(=O)CC[C@]4(C)[C@H]3CC[C@]12C)C(=O)C	IC50	=	Not Active	-1	MAP kinase ERK2	Sub-train	-1	0.963396	0.0366039	In
Cpd1245	CHEMBL44618	ClC(Cl)Cl	IC50	=	Not Active	-1	MAP kinase ERK2	Sub-train	-1	0.999992	8.25243e-06	In
Cpd1249	CHEMBL1288215	COC(=O)c1sccc1NC(=O)Cc2cccc3cnccc23	IC50	>	50000	-1	MAP kinase ERK2	Sub-train	-1	0.690768	0.309232	In
Cpd1250	CHEMBL203266	COc1ccc(CN2CCNCC2)c(OC)c1OC	IC50	=	Not Active	-1	MAP kinase ERK2	Sub-train	-1	0.99704	0.00295968	In
Cpd1252	CHEMBL3781651	COc1ccc(cc1)c2cnc3c(Nc4ccc(cc4)N5CCCCC5)nccc3n2	IC50	=	1440	-1	MAP kinase ERK2	Sub-train	1	0.329496	0.670504	In
Cpd1253	CHEMBL3781584	COc1cccc(Nc2nccc3nc(cnc23)c4ccccc4)c1	IC50	>	100000	-1	MAP kinase ERK2	Sub-train	-1	0.50248	0.49752	In
Cpd1258	CHEMBL1732	CN1C[C@@H](C[C@H]2[C@H]1Cc3c[nH]c4cccc2c34)C(=O)N[C@]5(C)O[C@@]6(O)[C@@H]7CCCN7C(=O)[C@H](Cc8ccccc8)N6C5=O	IC50	=	Not Active	-1	MAP kinase ERK2	Sub-train	-1	0.762174	0.237826	In
Cpd1260	CHEMBL252557	OCC(=O)O	IC50	=	Not Active	-1	MAP kinase ERK2	Sub-train	-1	0.999014	0.000985838	In
Cpd1261	CHEMBL1628227	CN(C)CCC=C1c2ccccc2COc3ccccc13	IC50	=	Not Active	-1	MAP kinase ERK2	Sub-train	-1	0.99396	0.00603994	In
Cpd1262	CHEMBL1430	CC(C)(S)[C@@H](N)C(=O)O	IC50	=	Not Active	-1	MAP kinase ERK2	Test	-1	0.999393	0.000607264	In
Cpd1264	CHEMBL1148	CC(C)NC(=O)NS(=O)(=O)c1cnccc1Nc2cccc(C)c2	IC50	=	Not Active	-1	MAP kinase ERK2	Test	-1	0.992979	0.00702109	In
Cpd1265	CHEMBL1630579	CCN(CC)CCOCCC1=CCC2CC1C2(C)C	IC50	=	Not Active	-1	MAP kinase ERK2	Sub-train	-1	0.997706	0.00229377	In
Cpd1269	CHEMBL1200559	CC(O)C(=O)O	IC50	=	Not Active	-1	MAP kinase ERK2	Sub-train	-1	0.998834	0.00116571	In
Cpd1274	CHEMBL1201010	CC(=O)OCC(=O)[C@@]1(O)CC[C@H]2[C@@H]3CCC4=CC(=O)CC[C@]4(C)[C@@]3(F)[C@@H](O)C[C@]12C	IC50	=	Not Active	-1	MAP kinase ERK2	Test	-1	0.960149	0.039851	In
Cpd1275	CHEMBL940	NCC1(CC(=O)O)CCCCC1	IC50	=	Not Active	-1	MAP kinase ERK2	Sub-train	-1	0.998148	0.00185226	In
Cpd1276	CHEMBL434063	CN(CCOc1ccc(C[C@H](Nc2ccccc2C(=O)c3ccccc3)C(=O)O)cc1)c4ccccn4	IC50	=	Not Active	-1	MAP kinase ERK2	Sub-train	1	0.0252791	0.974721	In
Cpd1277	CHEMBL765	NC(=N)NCCN1CCCCCCC1	IC50	=	Not Active	-1	MAP kinase ERK2	Sub-train	-1	0.997068	0.00293222	In
Cpd1278	CHEMBL980	COc1ccccc1OCC(O)CO	IC50	=	Not Active	-1	MAP kinase ERK2	Test	-1	0.991324	0.00867572	In
Cpd1279	CHEMBL1512	CC1(C)O[C@@H]2C[C@H]3[C@@H]4C[C@H](F)C5=CC(=O)C=C[C@]5(C)[C@H]4[C@@H](O)C[C@]3(C)[C@@]2(O1)C(=O)CO	IC50	=	Not Active	-1	MAP kinase ERK2	Sub-train	-1	0.989433	0.0105666	In
Cpd1280	CHEMBL521	CC(C)Cc1ccc(cc1)C(C)C(=O)O	IC50	=	Not Active	-1	MAP kinase ERK2	Sub-train	-1	0.92524	0.0747599	In
Cpd1282	CHEMBL1230607	CC(C)CC(=O)Nc1n[nH]c2c1CN(C(=O)C3CCN(C)CC3)C2(C)C	IC50	>	10000	-1	MAP kinase ERK2	Sub-train	-1	0.983485	0.0165149	In
Cpd1283	CHEMBL590109	NCCn1cc(c2cc(c3cc4ccccc4s3)c5[nH]ncc5c2)c6nc(N)ncc16	IC50	>	10000	-1	MAP kinase ERK2	Sub-train	-1	0.583067	0.416933	In
Cpd1288	CHEMBL1834657	CCN1CCN(CC1)c2ccc(Nc3cc(ncn3)N(C)C(=O)Nc4c(Cl)c(OC)cc(OC)c4Cl)cc2.OP(=O)(O)O	IC50	>	10000	-1	MAP kinase ERK2	Sub-train	1	0.139036	0.860964	In
Cpd1289	CHEMBL207544	N[C@H](COc1cnc(C#C)c(c1)c2ccc3cnccc3c2)Cc4c[nH]c5ccccc45	IC50	=	27200	-1	MAP kinase ERK2	Sub-train	1	0.0673852	0.932615	In
Cpd1291	CHEMBL990	CN(Cc1ccc(cc1)C(C)(C)C)Cc2cccc3ccccc23	IC50	=	Not Active	-1	MAP kinase ERK2	Sub-train	-1	0.892095	0.107905	In
Cpd1292	CHEMBL1042	CC(C)CCC[C@@H](C)[C@H]1CC[C@H]2\C(=C\C=C/3\C[C@@H](O)CCC3=C)\CCC[C@]12C	IC50	=	Not Active	-1	MAP kinase ERK2	Test	-1	0.98815	0.0118503	In
Cpd1297	CHEMBL296419	COc1ccc(CCN2CCC(CC2)Nc3nc4ccccc4n3Cc5ccc(F)cc5)cc1	IC50	=	Not Active	-1	MAP kinase ERK2	Sub-train	1	0.348587	0.651413	In
Cpd1298	CHEMBL1480	CCOC(=O)C1=C(C)NC(=C(C1c2cccc(Cl)c2Cl)C(=O)OC)C	IC50	=	Not Active	-1	MAP kinase ERK2	Sub-train	-1	0.996254	0.00374583	In
Cpd1299	CHEMBL1463	NC1=C(F)C=NC(=O)N1	IC50	=	Not Active	-1	MAP kinase ERK2	Sub-train	-1	0.99412	0.00588	In
Cpd1300	CHEMBL583	CC1CN(CCN1)c2cc3N(C=C(C(=O)O)C(=O)c3c(C)c2F)C4CC4	IC50	=	Not Active	-1	MAP kinase ERK2	Test	-1	0.992394	0.00760624	In
Cpd1301	CHEMBL914	CC(C)(C(=O)O)c1ccc(cc1)C(O)CCCN2CCC(CC2)C(O)(c3ccccc3)c4ccccc4	IC50	=	Not Active	-1	MAP kinase ERK2	Test	1	0.347761	0.652239	In
Cpd1302	CHEMBL1062	CC(=O)[C@@]1(O)CC[C@H]2[C@@H]3CCC4=CC(=O)CC[C@]4(C)[C@H]3CC[C@]12C	IC50	=	Not Active	-1	MAP kinase ERK2	Test	-1	0.986114	0.0138864	In
Cpd1304	CHEMBL817	Cc1ccc(cc1)S(=O)(=O)NC(=O)NN2CCCCCC2	IC50	=	Not Active	-1	MAP kinase ERK2	Test	-1	0.997614	0.00238643	In
Cpd1305	CHEMBL167911	COP(=O)(OC)OC=C(Cl)Cl	IC50	=	Not Active	-1	MAP kinase ERK2	Sub-train	-1	0.766091	0.233909	Outlier
Cpd1309	CHEMBL44884	CC[C@@H](CO)NCCN[C@@H](CC)CO	IC50	=	Not Active	-1	MAP kinase ERK2	Sub-train	-1	0.997784	0.00221566	In
Cpd1310	CHEMBL1214185	CC[C@H]1OC(=O)[C@H](C)[C@@H](O[C@H]2C[C@@](C)(OC)[C@@H](O)[C@H](C)O2)[C@H](C)[C@@H](O[C@@H]3O[C@H](C)C[C@@H]([C@H]3O)N(C)C)[C@](C)(O)C[C@@H](C)\C(=N/OCOCCOC)\[C@H](C)[C@@H](O)[C@]1(C)O	IC50	=	Not Active	-1	MAP kinase ERK2	Sub-train	-1	0.990889	0.00911074	Outlier
Cpd1311	CHEMBL443	Cc1onc(NS(=O)(=O)c2ccc(N)cc2)c1	IC50	=	Not Active	-1	MAP kinase ERK2	Sub-train	-1	0.974726	0.0252741	In
Cpd1313	CHEMBL1200993	[I-].[I-].[I-].CC[N+](CC)(CC)CCOc1cccc(OCC[N+](CC)(CC)CC)c1OCC[N+](CC)(CC)CC	IC50	=	Not Active	-1	MAP kinase ERK2	Sub-train	-1	0.999986	1.37624e-05	Outlier
Cpd1314	CHEMBL1308	Cc1cn[nH]c1	IC50	=	Not Active	-1	MAP kinase ERK2	Test	-1	0.983177	0.0168229	In
Cpd1315	CHEMBL1200545	C[C@H]1C[C@H]2[C@@H]3C[C@H](F)C4=CC(=O)C=C[C@]4(C)[C@@]3(F)[C@@H](O)C[C@]2(C)[C@@]1(OC(=O)C)C(=O)COC(=O)C	IC50	=	Not Active	-1	MAP kinase ERK2	Sub-train	-1	0.984846	0.0151541	In
Cpd1316	CHEMBL282575	C[C@]12CC[C@H]3[C@@H](CCc4cc(OC(=O)c5ccccc5)ccc34)[C@@H]1CC[C@@H]2O	IC50	=	Not Active	-1	MAP kinase ERK2	Sub-train	1	0.40751	0.59249	In
Cpd1318	CHEMBL1270795	CSc1cn2c(cnc2c(Nc3cc(C)ns3)n1)c4cn[nH]c4	IC50	>	10000	-1	MAP kinase ERK2	Sub-train	-1	0.726548	0.273452	In
Cpd1326	CHEMBL207130	COc1cc2ncnc(Nc3cccc(Cl)c3F)c2cc1CN(C)C4(CCN(C)CC4)C(=O)N	IC50	>	10000	-1	MAP kinase ERK2	Sub-train	1	0.462777	0.537223	In
Cpd1327	CHEMBL379601	COc1cc2ncnc(Nc3cccc(Cl)c3F)c2cc1CN(C)CC(=O)N	IC50	>	10000	-1	MAP kinase ERK2	Sub-train	-1	0.731169	0.268831	In
Cpd1328	CHEMBL151430	Nc1nc(c[nH]1)C2CCNC(=O)c3[nH]c(Br)c(Br)c23	IC50	=	1288	-1	MAP kinase ERK2	Sub-train	-1	0.999542	0.000457982	In
Cpd1330	CHEMBL204420	COc1cc2ncnc(Nc3cccc(Cl)c3F)c2cc1CN4CCN(C)CC4C(=O)N	IC50	>	10000	-1	MAP kinase ERK2	Test	-1	0.690961	0.309039	In
Cpd1331	CHEMBL206955	COc1cc2ncnc(Nc3ccc(F)c(Cl)c3)c2cc1CN4CCC[C@@H]4C(=O)N	IC50	>	10000	-1	MAP kinase ERK2	Sub-train	1	0.466757	0.533243	In
Cpd1332	CHEMBL1481	CCC1=C(C)CN(C(=O)NCCc2ccc(cc2)S(=O)(=O)NC(=O)N[C@@H]3CC[C@@H](C)CC3)C1=O	IC50	=	Not Active	-1	MAP kinase ERK2	Sub-train	-1	0.970791	0.029209	In
Cpd1334	CHEMBL467	NC(=O)NO	IC50	=	Not Active	-1	MAP kinase ERK2	Test	-1	0.992237	0.00776284	Outside-AD
Cpd1336	CHEMBL3663094	C[C@@H](NC(=O)Nc1cc2[nH]nc(c3ccc4nc(C)oc4c3)c2cn1)c5ccccc5	IC50	=	0.7204	1	MAP kinase ERK2	Sub-train	1	0.00824601	0.991754	In
Cpd1344	CHEMBL213451	CCNc1nnc2ccc(cn12)c3ocnc3c4ccc(F)cc4	IC50	>	10000	-1	MAP kinase ERK2	Sub-train	1	0.493851	0.506149	In
Cpd1348	CHEMBL210390	N[C@H](COc1cncc(c1)c2ccc3cnc(N)cc3c2)Cc4c[nH]c5ccccc45	IC50	=	1200	-1	MAP kinase ERK2	Test	1	0.0432745	0.956726	In
Cpd1349	CHEMBL1644642	O=C1N(Cc2ccncc2)N=C(N1c3ccc4ccccc4c3)c5ccnc(NC6CCCCC6)c5	IC50	>	50000	-1	MAP kinase ERK2	Sub-train	1	0.0262581	0.973742	In
Cpd1351	CHEMBL1644640	O=C1N(N=C(N1c2ccc3ccccc3c2)c4ccnc(NC5CCOCC5)c4)C6CCOC6	IC50	>	50000	-1	MAP kinase ERK2	Sub-train	1	0.215697	0.784303	In
Cpd1352	CHEMBL391655	CS(=O)(=O)c1ccc(CN2CCCc3c(C#N)c(NC(=O)c4cccc5ccccc45)sc23)cc1	IC50	>	10000	-1	MAP kinase ERK2	Sub-train	1	0.148694	0.851306	In
Cpd1353	CHEMBL232600	CN(C)CC(=O)N1CCc2c(C1)sc(NC(=O)c3cccc4ccccc34)c2C#N	IC50	>	10000	-1	MAP kinase ERK2	Sub-train	-1	0.987977	0.0120229	In
Cpd1367	CHEMBL369976	Nc1nn(CCO)c2nnc(cc12)c3c(nn4ccccc34)c5ccccc5	IC50	=	5100	-1	MAP kinase ERK2	Sub-train	-1	0.883329	0.116671	In
Cpd1371	CHEMBL447	CCCC(C)C1(CC=C)C(=O)NC(=O)NC1=O	IC50	=	Not Active	-1	MAP kinase ERK2	Test	-1	0.999577	0.000422652	In
Cpd1372	CHEMBL3654740	C[C@@H](NC(=O)Nc1cc2[nH]nc(c3ccc(cc3)S(=O)(=O)C)c2cn1)c4ccccc4	IC50	=	1.333	1	MAP kinase ERK2	Sub-train	1	0.0511659	0.948834	In
Cpd1390	CHEMBL2385543	Clc1ccc(cc1)c2oc3C(=O)N(Cc4ccccc4c5cccnc5)c6ccc(cc6Cc3c2)N7CCNCC7	IC50	>	30000	-1	MAP kinase ERK2	Sub-train	1	0.014877	0.985123	In
Cpd1412	CHEMBL3355482	CN(Cc1ccccc1)C(=O)c2ccc(cc2)S(=O)(=O)Nc3ccccc3	IC50	>	100000	-1	MAP kinase ERK2	Sub-train	1	0.387455	0.612545	In
Cpd1424	CHEMBL99743	COc1cc2ncnc(N3CCN(CC3)C(=O)Nc4ccc(cc4)[N+](=O)[O-])c2cc1OC	IC50	>	30000	-1	MAP kinase ERK2	Sub-train	1	0.365379	0.634621	In
Cpd1425	CHEMBL1080994	CN1CCN(CC1)S(=O)(=O)c2cccc(\C=C\c3cncc(C#N)c3Nc4ccc5[nH]ccc5c4C)c2	IC50	>	50000	-1	MAP kinase ERK2	Sub-train	-1	0.74306	0.25694	In
Cpd1426	CHEMBL323336	COc1cc2ncnc(N3CCN(CC3)C(=O)Nc4ccc(Br)cc4)c2cc1OC	IC50	>	30000	-1	MAP kinase ERK2	Sub-train	1	0.0711388	0.928861	In
Cpd1428	CHEMBL2220427	CC[C@H]1OC(=O)[C@H](C)[C@@H](O[C@H]2C[C@@](C)(OC)[C@@H](O)[C@H](C)O2)[C@H](C)[C@@H](O[C@@H]3O[C@H](C)C[C@@H]([C@H]3OC(=O)CC)N(C)C)[C@](C)(O)C[C@@H](C)C(=O)[C@H](C)[C@@H](O)[C@]1(C)O	IC50	=	Not Active	-1	MAP kinase ERK2	Sub-train	-1	0.998059	0.00194132	Outlier
Cpd1429	CHEMBL1110	Cc1[nH]cnc1CN2CCc3c(C2=O)c4ccccc4n3C	IC50	=	Not Active	-1	MAP kinase ERK2	Test	-1	0.973374	0.0266264	In
Cpd1430	CHEMBL564	CN(C)CCCN1c2ccccc2Sc3ccccc13	IC50	=	Not Active	-1	MAP kinase ERK2	Sub-train	-1	0.997121	0.00287921	In
Cpd1447	CHEMBL444633	CO[C@H]1\C=C\O[C@@]2(C)Oc3c(C)c(O)c4C(=O)C(=C5NC6(CCN(CC(C)C)CC6)N=C5c4c3C2=O)NC(=O)\C(=C/C=C/[C@H](C)[C@H](O)[C@@H](C)[C@@H](O)[C@@H](C)[C@H](OC(=O)C)[C@@H]1C)\C	IC50	=	Not Active	-1	MAP kinase ERK2	Sub-train	-1	0.997791	0.00220868	Outlier
Cpd1448	CHEMBL12948	CC1CCC(CC1)NC(=O)N(CCCl)N=O	IC50	=	Not Active	-1	MAP kinase ERK2	Sub-train	-1	0.944815	0.0551848	In
Cpd1454	CHEMBL1644621	O=C1NN=C(N1c2ccc3ccccc3c2)c4ccnc(NC5CCCC5)c4	IC50	>	50000	-1	MAP kinase ERK2	Sub-train	1	0.036104	0.963896	In
Cpd1455	CHEMBL1644630	O=C(Nc1cc(ccn1)C2=NNC(=O)N2c3ccc4ccccc4c3)C5CC5	IC50	>	50000	-1	MAP kinase ERK2	Sub-train	1	0.0656815	0.934318	In
Cpd1456	CHEMBL2381116	COc1ccc2CN(C(=O)c2c1)c3nc(cs3)C(=O)Nc4cnccc4N5CCNCC5	IC50	=	20000	-1	MAP kinase ERK2	Sub-train	-1	0.601095	0.398905	In
Cpd1457	CHEMBL1644641	O=C1N(N=C(N1c2ccc3ccccc3c2)c4ccnc(NC5CCOCC5)c4)c6ccccn6	IC50	>	50000	-1	MAP kinase ERK2	Test	1	0.0611324	0.938868	In
Cpd1458	CHEMBL1644628	C[C@H](Nc1cc(ccn1)C2=NNC(=O)N2c3ccc4ccccc4c3)c5ccccc5	IC50	>	5000	-1	MAP kinase ERK2	Sub-train	1	0.00795199	0.992048	In
Cpd1459	CHEMBL1644636	Nc1cccc2ccc(cc12)N3C(=O)NN=C3c4ccnc(NC5CCOCC5)c4	IC50	>	50000	-1	MAP kinase ERK2	Test	1	0.044324	0.955676	In
Cpd1463	CHEMBL412873	C1CCN2C[C@H]3C[C@H](CN4CCCC[C@@H]34)[C@H]2C1	IC50	=	Not Active	-1	MAP kinase ERK2	Test	-1	0.998119	0.00188055	In
Cpd1464	CHEMBL1236282	CS(=O)(=O)c1ccc(cc1)[C@@H](O)[C@@H](CO)NC(=O)C(Cl)Cl	IC50	=	Not Active	-1	MAP kinase ERK2	Sub-train	-1	0.561691	0.438309	In
Cpd1470	CHEMBL917	OC[C@H]1O[C@H](C[C@@H]1O)N2C=C(F)C(=O)NC2=O	IC50	=	Not Active	-1	MAP kinase ERK2	Sub-train	-1	0.992931	0.00706853	In
Cpd1475	CHEMBL461140	CN(C)CCOc1ccc(\C=C\c2cc(ccn2)c3cc4C(=O)NC=Nc4[nH]3)cc1	IC50	=	2600	-1	MAP kinase ERK2	Sub-train	1	0.367513	0.632487	In
Cpd1477	CHEMBL477817	Cc1c(Nc2c(cnc3sc(\C=C\C(=O)N4CCCC4)cc23)C#N)ccc5[nH]ccc15	IC50	>	50000	-1	MAP kinase ERK2	Sub-train	-1	0.577157	0.422843	In
Cpd1478	CHEMBL63560	C[C@](O)(CS(=O)(=O)c1ccc(F)cc1)C(=O)Nc2ccc(C#N)c(c2)C(F)(F)F	IC50	=	Not Active	-1	MAP kinase ERK2	Sub-train	-1	0.847275	0.152725	In
Cpd1479	CHEMBL64894	[Cl-].CN(C)c1ccc(cc1)C(=C2C=CC(=[N+](C)C)C=C2)c3ccc(cc3)N(C)C	IC50	=	Not Active	-1	MAP kinase ERK2	Sub-train	-1	0.989341	0.0106591	In
Cpd1480	CHEMBL134342	OC(=O)CCCC[C@@H]1CCSS1	IC50	=	Not Active	-1	MAP kinase ERK2	Sub-train	1	0.238258	0.761742	Outlier
Cpd1484	CHEMBL189171	COc1ccc2c(c1)c(CC(=O)OCC(=O)O)c(C)n2C(=O)c3ccc(Cl)cc3	IC50	=	Not Active	-1	MAP kinase ERK2	Sub-train	-1	0.897022	0.102978	In
Cpd1486	CHEMBL476	CN(C)\N=N\c1[nH]cnc1C(=O)N	IC50	=	Not Active	-1	MAP kinase ERK2	Sub-train	-1	0.980008	0.0199918	In
Cpd1487	CHEMBL1644633	Nc1ccc2cc(ccc2c1)N3C(=O)NN=C3c4ccnc(NC5CCOCC5)c4	IC50	>	50000	-1	MAP kinase ERK2	Sub-train	1	0.0435645	0.956435	In
Cpd1488	CHEMBL2408788	Cc1cc(ccn1)c2n[nH]c3cc(NC(=O)NCc4ccccc4)ncc23	IC50	=	0.8512	1	MAP kinase ERK2	Sub-train	1	0.0150754	0.984925	In
Cpd1506	CHEMBL3898796	CC(CO)Nc1ncc2ccc(cc2n1)C(=O)NC(c3ccc(Cl)c(F)c3)c4cnn(C)c4	IC50	=	2.5	1	MAP kinase ERK2	Test	1	0.127638	0.872362	In
Cpd1508	CHEMBL3658639	Cc1cc(ccn1)c2n[nH]c3cc(NC(=O)NCC4(CC4)c5ccc(F)cc5)ncc23	IC50	=	2.807	1	MAP kinase ERK2	Sub-train	1	0.00773515	0.992265	In
Cpd1510	CHEMBL4108506	Cn1cc(cn1)[C@@H](NC(=O)c2ccc3cnc(N[C@@H]4CCOC[C@H]4F)nc3c2)c5ccc(Cl)c(F)c5	IC50	=	2.1	1	MAP kinase ERK2	Sub-train	1	0.0723067	0.927693	In
Cpd1511	CHEMBL4112942	Cn1nncc1c2cnc(N)c(c2)c3ccc(C(=O)N[C@H](CO)c4ccccc4)c(F)c3	IC50	=	2.5	1	MAP kinase ERK2	Sub-train	1	0.0204921	0.979508	In
Cpd1512	CHEMBL4115445	Cn1nncc1c2cnc(N)c(c2)c3ccc(C(=O)N[C@H](CO)c4cccc(F)c4)c(F)c3	IC50	=	1.91	1	MAP kinase ERK2	Sub-train	1	0.0202195	0.979781	In
Cpd1513	CHEMBL4115031	C[C@@H](NC(=O)c1ccc(cc1)c2cc(cnc2N)C3CCOCC3)c4ccccc4	IC50	=	16	1	MAP kinase ERK2	Sub-train	1	0.0577592	0.942241	In
Cpd1515	CHEMBL3658750	Cc1cc(ccn1)c2n[nH]c3cc(NC(=O)NCC(N4CCCCC4)c5ccccc5)ncc23	IC50	=	4.944	1	MAP kinase ERK2	Test	1	0.00548729	0.994513	In
Cpd1517	CHEMBL3658764	Cc1cc(ccn1)c2n[nH]c3cc(NC(=O)NC4CCc5ccncc5C4)ncc23	IC50	=	5.418	1	MAP kinase ERK2	Sub-train	1	0.0107621	0.989238	In
Cpd1518	CHEMBL3945873	Nc1ncc(cc1c2ccc(C(=O)N[C@H](CO)c3ccccc3)c(F)c2)[C@@H]4CNC(=O)C4	IC50	=	32.7	1	MAP kinase ERK2	Test	1	0.0678015	0.932198	In
Cpd1519	CHEMBL3940759	Nc1ncc(cc1c2ccc(C(=O)N[C@H](CO)c3ccccc3)c(F)c2)[C@H]4CNC(=O)C4	IC50	=	72.3	1	MAP kinase ERK2	Test	1	0.0678015	0.932198	In
Cpd1520	CHEMBL3894824	Cc1nn(C)cc1c2cnc(N)c(c2)c3ccc(C(=O)NC(CN)c4cccc(Cl)c4)c(F)c3	IC50	=	0.0901	1	MAP kinase ERK2	Test	1	0.0397456	0.960254	In
Cpd1521	CHEMBL3658646	Cc1cc(ccn1)c2n[nH]c3cc(NC(=O)N[C@H]4CCOc5cc(F)ccc45)ncc23	IC50	=	14.7	1	MAP kinase ERK2	Sub-train	1	0.0109608	0.989039	In
Cpd1522	CHEMBL3895644	Cn1nccc1[C@@H](NC(=O)c2ccc3cnc(NC4CCOCC4)nc3c2)c5ccc(Cl)c(F)c5	IC50	=	151	1	MAP kinase ERK2	Sub-train	1	0.0851588	0.914841	In
Cpd1528	CHEMBL4109708	Nc1ncc(nc1c2ccc(C(=O)N[C@H](CO)c3cccc(Br)c3)c(F)c2)C4CCOCC4	IC50	=	0.0343	1	MAP kinase ERK2	Sub-train	1	0.025191	0.974809	In
Cpd1529	CHEMBL3975792	COc1ccc(cc1F)[C@H](NC(=O)c2ccc3cnc(Nc4ccnc(C)c4)nc3c2)c5cnn(C)c5	IC50	=	4.8	1	MAP kinase ERK2	Sub-train	1	0.0330918	0.966908	In
Cpd1530	CHEMBL3903954	COc1ccc(cc1F)[C@H](NC(=O)c2cc(F)c3cnc(Nc4cn(C)nc4C)nc3c2)c5cnn(C)c5	IC50	=	6.8	1	MAP kinase ERK2	Test	1	0.102482	0.897518	In
Cpd1531	CHEMBL3976794	COc1ccc(cc1)[C@H](NC(=O)c2cc(F)c3cnc(NC4CCOCC4)nc3c2)c5cnn(C)c5	IC50	=	7	1	MAP kinase ERK2	Sub-train	1	0.146889	0.853111	In
Cpd1541	CHEMBL4115615	C[C@@H](NC(=O)Nc1cc2[nH]nc(OCCC3CCCCN3)c2cn1)c4ccccc4	IC50	=	211.1	1	MAP kinase ERK2	Sub-train	1	0.0260248	0.973975	In
Cpd1542	CHEMBL3946516	COc1n[nH]c2cc(NC(=O)NC3CNc4ccccc4C3)nc(CO)c12	IC50	=	84	1	MAP kinase ERK2	Test	1	0.0740858	0.925914	In
Cpd1543	CHEMBL3932165	COc1cccc(F)c1CNC(=O)Nc2cc3[nH]nc(OC)c3c(CO)n2	IC50	=	17.4	1	MAP kinase ERK2	Sub-train	1	0.124971	0.875029	In
Cpd1544	CHEMBL4115410	Cn1cc(cn1)c2cnc(N)c(c2)c3ccc(C(=O)N[C@H]4C[C@@H]4c5ccccc5)c(F)c3	IC50	=	0.813	1	MAP kinase ERK2	Sub-train	1	0.0630793	0.936921	In
Cpd1545	CHEMBL4114294	Cn1nncc1c2cnc(N)c(c2)c3cc(F)c(C(=O)N[C@H](CO)c4cccc(Cl)c4)c(F)c3	IC50	=	0.183	1	MAP kinase ERK2	Sub-train	1	0.0138843	0.986116	In
Cpd1546	CHEMBL4111246	C[n+]1cn(C)cc1c2cnc(N)c(n2)c3ccc(C(=O)NCc4cccc(c4)S(=O)(=O)C)c(F)c3	IC50	=	7.33	1	MAP kinase ERK2	Sub-train	1	0.314573	0.685427	In
Cpd1547	CHEMBL3960984	Cn1cc(cn1)c2cnc(N)c(n2)c3ccc(C(=O)NCc4cccc(c4)S(=O)(=O)C)c(F)c3	IC50	=	45.4	1	MAP kinase ERK2	Test	1	0.32213	0.67787	In
Cpd1548	CHEMBL4111635	Cc1cc(ccc1C(=O)N[C@H](CO)c2cccc(Cl)c2)c3cc(cnc3N)c4cnnn4C	IC50	=	0.149	1	MAP kinase ERK2	Sub-train	1	0.0155518	0.984448	In
Cpd1549	CHEMBL4107745	Cc1nn(C)cc1c2cnc(N)c(c2)c3ccc(C(=O)N[C@H](CN)c4ccccc4)c(F)c3	IC50	=	0.38	1	MAP kinase ERK2	Sub-train	1	0.0610593	0.938941	In
Cpd1550	CHEMBL3933118	Nc1ncc(cc1c2ccc(C(=O)NCc3ccccc3)c(F)c2)[C@H]4CCS(=O)(=O)C4	IC50	=	354	1	MAP kinase ERK2	Sub-train	1	0.232951	0.767049	In
Cpd1552	CHEMBL3923915	CNC[C@@H](NC(=O)c1ccc(cc1F)c2nc(cnc2N)[C@H]3CC[C@H](O)[C@@H](F)C3)c4cc(F)cc(I)c4	IC50	=	0.0143	1	MAP kinase ERK2	Sub-train	1	0.0735689	0.926431	In
Cpd1553	CHEMBL3908901	COc1ccc(cc1F)[C@H](NC(=O)c2cc(F)c3cnc(N[C@@H]4C[C@H](F)C4)nc3c2)c5cnn(OC)c5	IC50	=	3.8	1	MAP kinase ERK2	Sub-train	1	0.08358	0.91642	In
Cpd1554	CHEMBL4112681	Nc1ncc(nc1c2ccc(C(=O)N[C@H](CO)c3cccc(F)c3)c(F)c2)C4CCOCC4	IC50	=	0.518	1	MAP kinase ERK2	Sub-train	1	0.0536927	0.946307	In
Cpd1556	CHEMBL3905523	Nc1ncc(nc1c2ccc(C(=O)NCc3cccc(Cl)c3)c(F)c2)C4CCOCC4	IC50	=	0.758	1	MAP kinase ERK2	Test	1	0.0517218	0.948278	In
Cpd1557	CHEMBL3981228	Nc1ncc(nc1c2ccc(C(=O)N[C@@H]3C[C@H]3c4ccccc4)c(F)c2)C5CCOCC5	IC50	=	64.2	1	MAP kinase ERK2	Sub-train	1	0.0523023	0.947698	In
Cpd1558	CHEMBL4108572	CNC[C@@H](NC(=O)c1ccc(cc1F)c2nc(cnc2N)[C@@H]3CC[C@@H](O)[C@H](F)C3)c4cccc(Br)c4	IC50	=	0.076	1	MAP kinase ERK2	Sub-train	1	0.0204723	0.979528	In
Cpd1559	CHEMBL3910050	COc1ccc(cc1F)[C@H](NC(=O)c2cc(F)c3cnc(NC4CCOCC4)nc3c2)c5ocnc5	IC50	=	1.3	1	MAP kinase ERK2	Sub-train	1	0.100446	0.899554	In
Cpd1560	CHEMBL3950434	COCCNC(=O)Nc1cc2[nH]nc(N3CCCC3)c2cn1	IC50	=	104.6	1	MAP kinase ERK2	Sub-train	1	0.46537	0.53463	In
Cpd1561	CHEMBL4115414	FC(F)COc1n[nH]c2cc(NC(=O)N[C@@H](c3ocnc3)c4ccc(Cl)c(Cl)c4)ncc12	IC50	=	135	1	MAP kinase ERK2	Sub-train	1	0.0238109	0.976189	In
Cpd1562	CHEMBL4112518	COc1n[nH]c2cc(NC(=O)N[C@@H]3CCCN(Cc4cccc(C)n4)C3)ncc12	IC50	=	116.1	1	MAP kinase ERK2	Sub-train	1	0.0454938	0.954506	In
Cpd1563	CHEMBL4113918	COc1n[nH]c2cc(NC(=O)N[C@@H](c3ccccc3)C4(O)CCC4)ncc12	IC50	=	4	1	MAP kinase ERK2	Test	1	0.0454457	0.954554	In
Cpd1564	CHEMBL3944883	COc1n[nH]c2cc(NC(=O)N[C@H]([C@@H]3CCCO3)c4ccccc4)ncc12	IC50	=	5.7	1	MAP kinase ERK2	Sub-train	1	0.0388894	0.961111	In
Cpd1565	CHEMBL3929876	CCOc1n[nH]c2cc(NC(=O)NC(CS(=O)(=O)C)c3ccccc3)ncc12	IC50	=	7.7	1	MAP kinase ERK2	Test	-1	0.664266	0.335734	In
Cpd1566	CHEMBL3675706	OC[C@@H](N1C=CC(=C(F)C1=O)c2ccnc(NC3CCOCC3)n2)c4ccc(Cl)c(F)c4	IC50	=	3	1	MAP kinase ERK2	Sub-train	1	0.335945	0.664055	In
Cpd1567	CHEMBL4114870	C[C@@H](NC(=O)Nc1cc2[nH]nc(NC(=O)OC3CCOCC3)c2cn1)c4ccc(F)cc4	IC50	=	19.7	1	MAP kinase ERK2	Test	1	0.0461878	0.953812	In
Cpd1568	CHEMBL3309997	OCCCNc1ccc2c(c1)nc(c3ccc4OCOc4c3)n5ncnc25	IC50	>	10000	-1	MAP kinase ERK2	Sub-train	-1	0.638136	0.361864	In
Cpd1569	CHEMBL4109053	COc1n[nH]c2cc(NC(=O)N[C@H](CS(=O)(=O)C)c3ccccc3)ncc12	IC50	=	25.4	1	MAP kinase ERK2	Sub-train	-1	0.718957	0.281043	In
Cpd1570	CHEMBL4111215	COc1n[nH]c2cc(NC(=O)N[C@H](C)c3ccccc3)nc(CN4CCOC4=O)c12	IC50	=	2.7	1	MAP kinase ERK2	Sub-train	1	0.0750042	0.924996	In
Cpd1571	CHEMBL4107334	C[C@@H](NC(=O)Nc1cc2[nH]nc(OCc3cscn3)c2cn1)c4ccccc4	IC50	=	85.7	1	MAP kinase ERK2	Sub-train	1	0.0161635	0.983836	In
Cpd1572	CHEMBL4107608	COC[C@@H](NC(=O)Nc1cc2[nH]nc(N3CCC(CC3)OC)c2cn1)c4ccccc4	IC50	=	1	1	MAP kinase ERK2	Sub-train	1	0.107046	0.892954	In
Cpd1574	CHEMBL3920826	CCNc1n[nH]c2cc(NC(=O)NC(c3ccc(F)cc3)C(C)(C)O)ncc12	IC50	=	1.1	1	MAP kinase ERK2	Sub-train	1	0.0581276	0.941872	In
Cpd1575	CHEMBL4106701	C[C@@H](NC(=O)Nc1cc2[nH]nc(NC3CCC(CC3)N(C)C)c2cn1)c4ccccc4	IC50	=	31.2	1	MAP kinase ERK2	Sub-train	1	0.0431658	0.956834	In
Cpd1576	CHEMBL4112607	CC(CN1CCOCC1)Nc2n[nH]c3cc(NC(=O)N[C@H](C)c4ccccc4)ncc23	IC50	=	33.8	1	MAP kinase ERK2	Sub-train	1	0.0456444	0.954356	In
Cpd1577	CHEMBL4107801	COc1n[nH]c2cc(NC(=O)N[C@H](C)c3ccc(Cl)c(Cl)c3)nc(CO)c12	IC50	=	1.2	1	MAP kinase ERK2	Sub-train	1	0.0367263	0.963274	In
Cpd1578	CHEMBL4108518	O[C@@H]1CCOc2ccccc2[C@@H]1NC(=O)Nc3cc4[nH]nc(OCC(F)F)c4cn3	IC50	=	0.6	1	MAP kinase ERK2	Sub-train	1	0.0359938	0.964006	In
Cpd1579	CHEMBL4109236	FC(F)OC[C@@H](NC(=O)Nc1cc2[nH]nc(OC3CCOCC3)c2cn1)c4ccccc4	IC50	=	0.7	1	MAP kinase ERK2	Sub-train	1	0.023334	0.976666	In
Cpd1580	CHEMBL4113385	C[C@@H](NC(=O)Nc1cc2[nH]nc(OC3CCOCC3C)c2cn1)c4ccccc4	IC50	=	4.9	1	MAP kinase ERK2	Sub-train	1	0.0560454	0.943955	In
Cpd1585	CHEMBL3590123	Cn1nccc1Nc2ncc(Cl)c(Nc3ccccc3NC(=O)C=C)n2	IC50	=	13	1	MAP kinase ERK2	Sub-train	-1	0.652006	0.347994	In
Cpd1590	CHEMBL1922117	CC[C@@H](Nc1nc(NCc2ccccn2)c3ncn(C(C)C)c3n1)C(O)C(C)(C)C	IC50	>	200000	-1	MAP kinase ERK2	Sub-train	-1	0.875684	0.124316	In
Cpd1591	CHEMBL1922120	CCC(O)[C@@H](CC)Nc1nc(NCc2cccnc2)c3ncn(C(C)C)c3n1	IC50	=	37000	-1	MAP kinase ERK2	Test	-1	0.81474	0.18526	In
Cpd1592	CHEMBL1922121	CC[C@@H](Nc1nc(NCc2cccnc2)c3ncn(C(C)C)c3n1)C(O)C(C)C	IC50	=	111000	-1	MAP kinase ERK2	Sub-train	-1	0.840439	0.159561	In
Cpd1593	CHEMBL3956761	COCCOc1n[nH]c2cc(NC(=O)N[C@@H]3CNC[C@H]3c4ccccc4)ncc12	IC50	=	264.6	1	MAP kinase ERK2	Sub-train	1	0.0380911	0.961909	In
Cpd1594	CHEMBL3675723	Cn1cc(cn1)C(N2C=CC(=CC2=O)c3nc(NC4CCOCC4)ncc3F)c5ccc(Cl)c(Cl)c5	IC50	=	0.8	1	MAP kinase ERK2	Test	-1	0.524211	0.475789	In
Cpd1595	CHEMBL4107819	COCc1nc(NC(=O)N[C@H](C)c2ccccc2)cc3[nH]nc(OC)c13	IC50	=	8.89	1	MAP kinase ERK2	Sub-train	1	0.164597	0.835403	In
Cpd1596	CHEMBL4108040	COC[C@@H](NC(=O)Nc1cc2[nH]nc(Nc3cnn(C)c3)c2cn1)c4ccccc4	IC50	=	19.7	1	MAP kinase ERK2	Test	1	0.0600784	0.939922	In
Cpd1597	CHEMBL4114407	COC[C@@H](NC(=O)Nc1cc2[nH]nc(Nc3cnn(C)c3)c2cn1)c4ccc(F)cc4	IC50	=	14.7	1	MAP kinase ERK2	Sub-train	1	0.0590693	0.940931	In
Cpd1600	CHEMBL3919189	CNC[C@@H](NC(=O)c1ccc(cc1F)c2nc(cnc2N)C3CCOCC3)c4cccc(Cl)c4	IC50	=	0.0282	1	MAP kinase ERK2	Sub-train	1	0.0491072	0.950893	In
Cpd1601	CHEMBL4112111	Cc1cnccc1c2cnc(N)c(c2)c3ccc(C(=O)N[C@H](CO)c4ccccc4)c(F)c3	IC50	=	0.752	1	MAP kinase ERK2	Sub-train	1	0.0119419	0.988058	In
Cpd1602	CHEMBL4115307	CNC[C@@H](NC(=O)c1ccc(cc1F)c2nc(cnc2N)C3CCOCC3)c4cc(F)cc(Cl)c4	IC50	=	0.0143	1	MAP kinase ERK2	Sub-train	1	0.0514742	0.948526	In
Cpd1604	CHEMBL4108568	Cn1cc(cn1)c2cnc(N)c(c2F)c3ccc(C(=O)N[C@H](CO)c4ccccc4)c(F)c3	IC50	=	9.77	1	MAP kinase ERK2	Sub-train	1	0.110579	0.889421	In
Cpd1605	CHEMBL4079223	CC[C@H](C)[C@H](NC(=O)[C@H](CO)NC(=O)[C@H](CO)NC(=O)[C@H](CCC(=O)O)NC(=O)[C@@H](NC(=O)[C@@H]1CCCN1C(=O)[C@H](CCCCN)NC(=O)[C@H](CC(C)C)NC(=O)[C@H](CCC(=O)N)NC(=O)[C@H](C)NC(=O)[C@@H](NC(=O)CNC(=O)C(N)CCCCn2cc(CCCCNC(=O)CCCCCn3nc(N)c4cc(nnc34)c5c(nn6ccccc56)c7ccccc7)nn2)[C@@H](C)O)[C@@H](C)CC)C(=O)N[C@@H](CC(C)C)C(=O)N[C@@H](C)C(=O)N[C@@H](CCC(=O)N)C(=O)N[C@@H](CCCNC(=N)N)C(=O)N[C@@H](CCCNC(=N)N)C(…	IC50	=	25	1	MAP kinase ERK2	Sub-train	-1	0.992528	0.00747189	Outlier
Cpd1606	CHEMBL1922122	CC[C@@H](Nc1nc(NCc2cccnc2)c3ncn(C(C)C)c3n1)C(O)C(C)(C)C	IC50	=	51000	-1	MAP kinase ERK2	Sub-train	-1	0.877098	0.122902	In
Cpd1607	CHEMBL1922199	CC[C@@H](Nc1nc(NCc2ccccc2)c3ncn(C(C)C)c3n1)C(C)O	IC50	=	43000	-1	MAP kinase ERK2	Sub-train	-1	0.771929	0.228071	In
Cpd1609	CHEMBL4112757	NC[C@@H](NC(=O)c1ccc(cc1F)c2nc(cnc2N)C3CCOCC3)c4ccccc4	IC50	=	0.253	1	MAP kinase ERK2	Sub-train	1	0.055602	0.944398	In
Cpd1610	CHEMBL4112789	Nc1ncc(nc1c2ccc(C(=O)N[C@H](CO)c3cccc(Cl)c3)c(F)c2)[C@@H]4CC[C@@H](O)CC4	IC50	=	0.69	1	MAP kinase ERK2	Sub-train	1	0.0232879	0.976712	In
Cpd1611	CHEMBL4113952	Nc1ncc(nc1c2ccc(C(=O)N[C@H](CO)c3cccc(Cl)c3)c(F)c2)C4=CCCCC4	IC50	=	0.907	1	MAP kinase ERK2	Sub-train	1	0.0192926	0.980707	In
Cpd1613	CHEMBL3941965	Nc1ncc(cc1c2ccc(C(=O)NCc3ccccc3)c(F)c2)[C@@H]4CCS(=O)(=O)C4	IC50	=	278	1	MAP kinase ERK2	Sub-train	1	0.232951	0.767049	In
Cpd1614	CHEMBL3960579	Nc1ncc(cc1c2ccc(C(=O)N[C@H](CO)c3cccc(Cl)c3)c(F)c2)[C@@H]4CN[C@H](CO)C4	IC50	=	65.2	1	MAP kinase ERK2	Test	1	0.0177526	0.982247	In
Cpd1615	CHEMBL4112462	Nc1ncc(nc1c2ccc(cc2)C(=O)N[C@H](CO)c3ccccc3)c4cocc4	IC50	=	13.3	1	MAP kinase ERK2	Sub-train	1	0.0424443	0.957556	In
Cpd1616	CHEMBL4106512	Nc1ncc(nc1c2ccc(C(=O)N[C@H](CO)c3ccccc3)c(F)c2)c4ccnnc4	IC50	=	1.18	1	MAP kinase ERK2	Test	1	0.00850276	0.991497	In
Cpd1617	CHEMBL3902723	Nc1ncc(nc1c2ccc(C(=O)NCc3ccccc3)c(F)c2)[C@H]4CCC[C@@H](O)C4	IC50	=	39.6	1	MAP kinase ERK2	Sub-train	1	0.0541584	0.945842	In
Cpd1619	CHEMBL4112586	COCCOc1n[nH]c2cc(NC(=O)N[C@@H]3CCCN(Cc4c(F)cccc4OC)C3)ncc12	IC50	=	1.53	1	MAP kinase ERK2	Test	1	0.0517583	0.948242	In
Cpd1620	CHEMBL4110968	COc1n[nH]c2c(F)c(NC(=O)N[C@H](C)c3ccccc3)ncc12	IC50	=	21.51	1	MAP kinase ERK2	Sub-train	1	0.0905416	0.909458	In
Cpd1621	CHEMBL4112286	COC(=O)N[C@@H]1CC[C@@H](CC1)c2cnc(N)c(n2)c3ccc(C(=O)N[C@H](CO)c4cccc(Cl)c4)c(F)c3	IC50	=	1.57	1	MAP kinase ERK2	Test	1	0.0614478	0.938552	Outside-AD
Cpd1622	CHEMBL3663113	Fc1ccc(CNC(=O)Nc2cc3[nH]nc(c4ccc(OC(F)(F)F)cc4)c3cn2)cc1	IC50	=	89.24	1	MAP kinase ERK2	Sub-train	1	0.0130527	0.986947	In
Cpd1623	CHEMBL3663134	COC[C@@H](NC(=O)Nc1cc2[nH]nc(c3ccc4nnn(C)c4c3)c2cn1)c5ccccc5	IC50	=	0.2213	1	MAP kinase ERK2	Sub-train	1	0.00918391	0.990816	In
Cpd1625	CHEMBL4107892	Cc1cnccc1c2cnc(N)c(c2)c3ccc(cc3)C(=O)N[C@H](CO)c4ccccc4	IC50	=	2.13	1	MAP kinase ERK2	Sub-train	1	0.0142356	0.985764	In
Cpd1626	CHEMBL3934390	Nc1ncc(cc1c2ccc(cc2)C(=O)NCc3cccc(Cl)c3)C4CCOCC4	IC50	=	4.78	1	MAP kinase ERK2	Test	1	0.0417627	0.958237	In
Cpd1627	CHEMBL4106520	COC[C@@H](NC(=O)Nc1ncc2c(OC)n[nH]c2c1Br)c3ccccc3	IC50	=	1807	-1	MAP kinase ERK2	Sub-train	1	0.332355	0.667645	In
Cpd1628	CHEMBL4114542	COCCOc1n[nH]c2cc(NC(=O)N[C@H]3CN(C)C[C@@H]3c4ccccc4)ncc12	IC50	=	1.2	1	MAP kinase ERK2	Sub-train	1	0.0602471	0.939753	In
Cpd1629	CHEMBL4107603	COc1n[nH]c2cc(NC(=O)N[C@H](C)c3ccccc3)nc(c12)C(F)(F)F	IC50	=	165	1	MAP kinase ERK2	Sub-train	1	0.139089	0.860911	In
Cpd1631	CHEMBL3902183	COc1n[nH]c2cc(NC(=O)NC(C)c3ccc(F)c(F)c3)nc(CO)c12	IC50	=	4	1	MAP kinase ERK2	Sub-train	1	0.104443	0.895557	In
Cpd1632	CHEMBL4108153	COC[C@@H](C)NC(=O)Nc1cc2[nH]nc(OC)c2c(CO)n1	IC50	=	614.3	-1	MAP kinase ERK2	Sub-train	-1	0.580582	0.419418	In
Cpd1633	CHEMBL207445	COCC[C@H](N(C)Cc1cc2c(Nc3cccc(Cl)c3F)ncnc2cc1OC)C(=O)N	IC50	>	10000	-1	MAP kinase ERK2	Test	-1	0.524012	0.475988	In
Cpd1634	CHEMBL4115487	CCn1cc(cn1)c2cnc(N)c(c2)c3ccc(C(=O)N[C@H](CO)c4cc(F)cc(c4)S(=O)(=O)C)c(F)c3	IC50	=	0.617	1	MAP kinase ERK2	Sub-train	1	0.191787	0.808213	In
Cpd1635	CHEMBL3893186	Nc1ncc(cc1c2ccc(C(=O)NCc3ccccc3)c(F)c2)C4CNC(=O)C4	IC50	=	330	1	MAP kinase ERK2	Test	1	0.093926	0.906074	In
Cpd1636	CHEMBL3921367	CS(=O)(=O)[C@@H]1CC[C@H](CC1)c2cnc(N)c(n2)c3ccc(C(=O)NCc4ccccc4)c(F)c3	IC50	=	64.4	1	MAP kinase ERK2	Sub-train	1	0.387211	0.612789	In
Cpd1637	CHEMBL3953599	CS(=O)(=O)CCc1cnc(N)c(n1)c2ccc(C(=O)NCc3ccccc3)c(F)c2	IC50	=	2670	-1	MAP kinase ERK2	Sub-train	1	0.326581	0.673419	In
Cpd1638	CHEMBL3949682	CN1CC[C@@H](CC1=O)c2cnc(N)c(c2)c3ccc(C(=O)N[C@H](CO)c4cccc(Cl)c4)c(F)c3	IC50	=	2.55	1	MAP kinase ERK2	Test	1	0.106973	0.893027	In
Cpd1639	CHEMBL3968451	CN1C[C@@H](CC1=O)c2cnc(N)c(c2)c3ccc(C(=O)N[C@H](CO)c4cccc(Cl)c4)c(F)c3	IC50	=	4.77	1	MAP kinase ERK2	Test	1	0.0775739	0.922426	In
Cpd1640	CHEMBL3904235	Nc1ncc(nc1c2ccc(C(=O)N[C@H](CO)c3cc(F)cc(I)c3)c(F)c2)[C@H]4CC[C@H](O)[C@@H](O)C4	IC50	=	0.0055	1	MAP kinase ERK2	Test	1	0.053996	0.946004	In
Cpd1641	CHEMBL3910107	Nc1ncc(nc1c2ccc(C(=O)N[C@H](CO)c3cc(F)cc(Br)c3)c(F)c2)[C@H]4CC[C@H](O)[C@@H](O)C4	IC50	=	0.0446	1	MAP kinase ERK2	Sub-train	1	0.014342	0.985658	In
Cpd1642	CHEMBL4111946	Nc1ncc(cc1c2ccc(C(=O)N[C@H](CO)c3cc(F)cc(Br)c3)c(F)c2)C(=O)N4CCC(O)CC4	IC50	=	8.59	1	MAP kinase ERK2	Sub-train	1	0.0410568	0.958943	In
Cpd1644	CHEMBL4110027	COC(=O)Nc1n[nH]c2cc(NC(=O)N[C@@H](c3ccc(F)cc3)C4(O)CCC4)ncc12	IC50	=	0.4	1	MAP kinase ERK2	Test	1	0.0175538	0.982446	In
Cpd1645	CHEMBL4113172	Cn1nncc1c2cnc(N)c(c2)c3ccc(C(=O)N[C@H](CO)c4cccc(Br)c4)c(F)c3	IC50	=	0.0487	1	MAP kinase ERK2	Sub-train	1	0.00921088	0.990789	In
Cpd1646	CHEMBL4115216	COC[C@@H](NC(=O)Nc1cc2[nH]nc(OC)c2cn1)c3ccccc3	IC50	=	8.03	1	MAP kinase ERK2	Sub-train	1	0.0553726	0.944627	In
Cpd1648	CHEMBL3890881	CC(=O)NC1CCC(CC1)c2cnc(N)c(n2)c3ccc(C(=O)N[C@H](CO)c4cccc(Cl)c4)c(F)c3	IC50	=	1.19	1	MAP kinase ERK2	Sub-train	1	0.101639	0.898361	In
Cpd1649	CHEMBL4115339	C[C@@H](NC(=O)c1ccc(cc1F)c2cc(cnc2N)c3cnnn3C)c4cccc(Cl)c4	IC50	=	0.221	1	MAP kinase ERK2	Test	1	0.017259	0.982741	In
Cpd1650	CHEMBL3929367	Cc1nc(NC(=O)N[C@@H](c2ccccc2)C(C)(C)O)cc3[nH]nc(OCCO)c13	IC50	=	0.4	1	MAP kinase ERK2	Sub-train	1	0.0538373	0.946163	In
Cpd1651	CHEMBL3908768	Nc1ncc(nc1c2ccc(C(=O)N[C@H](CO)c3cccc(Cl)c3)c(F)c2)C4CCC(CC4)NC(=O)CO	IC50	=	0.929	1	MAP kinase ERK2	Sub-train	1	0.0589463	0.941054	In
Cpd1652	CHEMBL4113996	C[C@@H](O)[C@@H](NC(=O)Nc1cc2[nH]nc(OCCO)c2c(CO)n1)c3ccc(F)cc3	IC50	=	0.5	1	MAP kinase ERK2	Sub-train	1	0.0700898	0.92991	In
Cpd1653	CHEMBL4113191	COc1n[nH]c2cc(NC(=O)N[C@@H]3CCCOc4ccccc34)ncc12	IC50	=	5.8	1	MAP kinase ERK2	Sub-train	1	0.0786434	0.921357	In
Cpd1655	CHEMBL4078489	OC[C@@H](N1CCc2[nH]c(cc2C1=O)c3ccnc(NC4CCOCC4)n3)c5ccccc5	IC50	=	0.43	1	MAP kinase ERK2	Sub-train	1	0.192169	0.807831	In
Cpd1660	CHEMBL4071576	C[C@@H]1Cn2cc(cc2C(=O)N1Cc3cccc(C)n3)c4nc(Nc5ccnn5C)ncc4C	IC50	=	0.5	1	MAP kinase ERK2	Sub-train	1	0.429689	0.570311	In
Cpd1661	CHEMBL4079515	Cn1c2CCNC(=O)c2cc1c3ccnc(NC4CCOCC4)n3	IC50	=	7.9	1	MAP kinase ERK2	Sub-train	-1	0.693712	0.306288	In
Cpd1668	CHEMBL380386	COc1cc2ncnc(Nc3cccc(Cl)c3F)c2cc1CN[C@H](C)C(=O)N	IC50	>	10000	-1	MAP kinase ERK2	Sub-train	-1	0.588132	0.411868	In
Cpd1671	CHEMBL3628370	COc1ccc(cn1)c2c[nH]c3ncc(nc23)c4ccncc4	IC50	=	252	1	MAP kinase ERK2	Sub-train	-1	0.716373	0.283627	In
Cpd1676	CHEMBL3954924	Cn1cc(cn1)[C@@H](NC(=O)c2ccc3cnc(NC4CCOCC4)nc3c2)c5ccc(c(F)c5)C(F)(F)F	IC50	=	5.2	1	MAP kinase ERK2	Test	1	0.0964405	0.90356	In
Cpd1677	CHEMBL3946240	Cn1cc(cn1)C(NC(=O)c2ccc3cnc(NC4CCOCC4)nc3c2)c5ccc(OC(F)F)cc5	IC50	=	12.1	1	MAP kinase ERK2	Sub-train	1	0.0810739	0.918926	In
Cpd1678	CHEMBL4109474	Nc1ncc(nc1c2ccc(C(=O)N[C@H](CNCCF)c3cc(F)cc(Br)c3)c(F)c2)C4CCOCC4	IC50	=	0.0743	1	MAP kinase ERK2	Sub-train	1	0.0273107	0.972689	In
Cpd1679	CHEMBL4115643	Cc1c(cnn1C)c2cnc(N)c(c2)c3ccc(C(=O)N[C@H](CO)c4cccc(c4)C(F)F)c(F)c3	IC50	=	0.0371	1	MAP kinase ERK2	Test	1	0.030522	0.969478	In
Cpd1680	CHEMBL4108955	Cc1nn(C)cc1c2cnc(N)c(c2)c3ccc(C(=O)N[C@H](CO)c4cccc(c4)C(F)F)c(F)c3	IC50	=	0.0707	1	MAP kinase ERK2	Sub-train	1	0.0370892	0.962911	In
Cpd1681	CHEMBL4111507	C[C@@H](NC(=O)c1ccc(cc1F)c2cc(cnc2N)c3cnn(C(F)F)c3C)c4cc(F)cc(c4)S(=O)(=O)C	IC50	=	0.146	1	MAP kinase ERK2	Sub-train	1	0.1237	0.8763	In
Cpd1684	CHEMBL4108747	CNC[C@@H](NC(=O)c1ccc(cc1F)c2nc(cnc2N)[C@@H]3CC[C@H](CC3)OC)c4cc(F)cc(Br)c4	IC50	=	0.0205	1	MAP kinase ERK2	Sub-train	1	0.046045	0.953955	In
Cpd1688	CHEMBL516	CN1CCC(=C2c3ccccc3C=Cc4ccccc24)CC1	IC50	=	Not Active	-1	MAP kinase ERK2	Sub-train	-1	0.994996	0.00500368	In
Cpd1697	CHEMBL3654692	Cc1cc(ccn1)c2n[nH]c3cc(NC(=O)NC(C4CC4)C(F)(F)F)ncc23	IC50	=	4.482	1	MAP kinase ERK2	Sub-train	1	0.0656104	0.93439	In
Cpd1700	CHEMBL4109263	CN1C[C@H](NC(=O)Nc2cc3[nH]nc(N4CCOCC4)c3cn2)[C@H](C1)c5ccccc5	IC50	=	20.18	1	MAP kinase ERK2	Sub-train	1	0.066476	0.933524	In
Cpd1702	CHEMBL4113717	CCOc1n[nH]c2cc(NC(=O)N[C@H]([C@@H](C)O)c3ccc(F)cc3)nc(CO)c12	IC50	=	0.3	1	MAP kinase ERK2	Test	1	0.0778413	0.922159	In
Cpd1703	CHEMBL4113754	C[C@@H](NC(=O)Nc1cc2[nH]nc(NCC3CC3)c2cn1)c4ccccc4	IC50	=	1.8	1	MAP kinase ERK2	Sub-train	1	0.0330913	0.966909	In
Cpd1704	CHEMBL4114848	C[C@@H](NC(=O)Nc1cc2[nH]nc(N(CC3CC3)CC4CC4)c2cn1)c5ccccc5	IC50	=	279	1	MAP kinase ERK2	Sub-train	1	0.0521306	0.947869	In
Cpd1705	CHEMBL4114063	CC(C)C(=O)Nc1n[nH]c2cc(NC(=O)N[C@H](C)c3ccccc3)ncc12	IC50	=	0.6	1	MAP kinase ERK2	Sub-train	1	0.0817151	0.918285	In
Cpd1706	CHEMBL4108190	CCOc1n[nH]c2cc(NC(=O)N[C@H](C)c3ccccc3)nc([C@@H](C)O)c12	IC50	=	1.2	1	MAP kinase ERK2	Sub-train	1	0.1299	0.8701	In
Cpd1707	CHEMBL3941331	COCCOc1n[nH]c2cc(NC(=O)NCCc3ccc(OC)cc3)ncc12	IC50	=	11.96	1	MAP kinase ERK2	Sub-train	1	0.0578099	0.94219	In
Cpd1708	CHEMBL3924521	CC(=O)N1CCCC(C1)c2cnc(N)c(n2)c3ccc(C(=O)N[C@H](CO)c4ccccc4)c(F)c3	IC50	=	28.5	1	MAP kinase ERK2	Sub-train	1	0.201228	0.798772	In
Cpd1709	CHEMBL3963858	COC1CCCC(C1)c2cnc(N)c(n2)c3ccc(C(=O)NCc4ccccc4)c(F)c3	IC50	=	62.6	1	MAP kinase ERK2	Sub-train	1	0.0679136	0.932086	In
Cpd1713	CHEMBL3956128	Nc1ncc(nc1c2ccc(C(=O)N[C@H](CO)c3cc(F)cc(I)c3)c(F)c2)[C@H]4CC[C@H](O)[C@@H](F)C4	IC50	=	0.0139	1	MAP kinase ERK2	Test	1	0.0469558	0.953044	In
Cpd1714	CHEMBL4110708	COC(=O)NC[C@@H](NC(=O)c1ccc(cc1F)c2nc(cnc2N)C3CCOCC3)c4cc(F)cc(Br)c4	IC50	=	0.0943	1	MAP kinase ERK2	Sub-train	1	0.0300019	0.969998	In
Cpd1718	CHEMBL3968457	COc1n[nH]c2cc(NC(=O)NC(c3ccc(F)cc3)C(C)(C)OC)ncc12	IC50	=	4.2	1	MAP kinase ERK2	Sub-train	1	0.0871667	0.912833	In
Cpd1719	CHEMBL4112503	COc1n[nH]c2cc(NC(=O)N[C@H](C)c3ccccc3)nc(c4ocnc4)c12	IC50	=	2.3	1	MAP kinase ERK2	Sub-train	1	0.114896	0.885104	In
Cpd1720	CHEMBL4114178	COc1n[nH]c2cc(NC(=O)N[C@@H]3CCOc4ccccc34)ncc12	IC50	=	968.3	-1	MAP kinase ERK2	Sub-train	1	0.0647845	0.935216	In
Cpd1721	CHEMBL3976263	COc1n[nH]c2cc(NC(=O)NCc3ccc(F)c(Cl)c3)ncc12	IC50	=	212.5	1	MAP kinase ERK2	Sub-train	1	0.0387727	0.961227	In
Cpd1723	CHEMBL3976981	CC(C)(O)[C@@H](NC(=O)Nc1cc2[nH]nc3NCCc(n1)c23)c4ccccc4	IC50	=	1.3	1	MAP kinase ERK2	Test	1	0.0539375	0.946063	In
Cpd1724	CHEMBL4110185	CNc1n[nH]c2cc(NC(=O)N[C@@H]([C@H]3CCCO3)c4ccccc4)ncc12	IC50	=	246	1	MAP kinase ERK2	Sub-train	1	0.0284215	0.971579	In
Cpd1725	CHEMBL4113074	CCNc1n[nH]c2cc(NC(=O)N[C@H]([C@H]3CCCO3)c4ccccc4)ncc12	IC50	=	0.6	1	MAP kinase ERK2	Sub-train	1	0.0256167	0.974383	In
Cpd1726	CHEMBL3892129	Nc1n[nH]c2cc(NC(=O)N[C@H]([C@@H]3CCCO3)c4ccccc4)ncc12	IC50	=	0.9	1	MAP kinase ERK2	Sub-train	1	0.0251694	0.974831	In
Cpd1729	CHEMBL4109110	COc1n[nH]c2cc(NC(=O)N[C@H](C)c3ccccc3)nc(C4=NNC(=O)O4)c12	IC50	=	28.9	1	MAP kinase ERK2	Sub-train	1	0.183764	0.816236	In
Cpd1730	CHEMBL3944087	COc1n[nH]c2cc(NC(=O)N[C@@H](c3ccccc3)C(C)(C)O)nc(c4ocnc4)c12	IC50	=	4.3	1	MAP kinase ERK2	Test	1	0.107189	0.892811	In
Cpd1731	CHEMBL3945974	COc1n[nH]c2cc(NC(=O)N[C@@H](c3ccccc3)C(C)(C)OC)nc(CO)c12	IC50	=	2.7	1	MAP kinase ERK2	Sub-train	1	0.0746126	0.925387	In
Cpd1732	CHEMBL3658791	Cc1cc(ccn1)c2n[nH]c3cc(NC(=O)NCc4nccn4C)ncc23	IC50	=	1.455	1	MAP kinase ERK2	Sub-train	1	0.0672132	0.932787	In
Cpd1735	CHEMBL4107147	COc1ccc(cc1F)[C@@H](NC(=O)c2cc(F)c3cnc(NC4CCOCC4)nc3c2)c5cnn(C)n5	IC50	=	31	1	MAP kinase ERK2	Sub-train	1	0.121093	0.878907	In
Cpd1737	CHEMBL3654778	O=C(NCC1CC1)Nc2cc3[nH]nc(C4CC4)c3cn2	IC50	=	84.3	1	MAP kinase ERK2	Test	1	0.279664	0.720336	In
Cpd1739	CHEMBL4113111	COC[C@@H](NC(=O)Nc1cc2[nH]nc(Nc3ccc(F)cc3)c2cn1)c4ccc(F)cc4	IC50	=	57.2	1	MAP kinase ERK2	Sub-train	1	0.0103116	0.989688	In
Cpd1741	CHEMBL4111837	Fc1ccc(cc1Cl)[C@@H](NC(=O)c2ccc3cnc(NC4CCOCC4)nc3c2)[C@@]5(F)CCNC5	IC50	=	73.6	1	MAP kinase ERK2	Sub-train	1	0.0868485	0.913152	In
Cpd1742	CHEMBL3896305	C[C@H](Nc1ncc2ccc(cc2n1)C(=O)N[C@H]([C@@H]3CCCN3)c4ccc(Cl)c(F)c4)C(F)(F)F	IC50	=	7.3	1	MAP kinase ERK2	Test	1	0.0520879	0.947912	In
Cpd1745	CHEMBL4110870	COc1ccc(cc1F)[C@H](NC(=O)c2cc(F)c3cnc(N[C@H]4CCOC[C@H]4F)nc3c2)c5cnn(C)c5	IC50	=	2.6	1	MAP kinase ERK2	Sub-train	1	0.0990467	0.900953	In
Cpd1746	CHEMBL3951275	COc1ccc(cc1F)[C@H](NC(=O)c2ccc3cnc(N[C@H]4CCO[C@H](COC(=O)C)C4)nc3c2)c5cnn(C)c5	IC50	=	24	1	MAP kinase ERK2	Sub-train	1	0.259749	0.740251	In
Cpd1747	CHEMBL4114102	C[C@@H](NC(=O)Nc1cc2[nH]nc(NC(C)(C)C)c2cn1)c3ccccc3	IC50	=	88	1	MAP kinase ERK2	Sub-train	1	0.0793488	0.920651	In
Cpd1748	CHEMBL4110235	Nc1n[nH]c2cc(NC(=O)C[C@H](COC(F)F)c3ccccc3)ncc12	IC50	=	1.2	1	MAP kinase ERK2	Sub-train	1	0.0537641	0.946236	In
Cpd1751	CHEMBL75880	C(C(C1CCCCC1)C2CCCCC2)C3CCCCN3	IC50	=	Not Active	-1	MAP kinase ERK2	Sub-train	-1	0.996813	0.00318728	In
Cpd1755	CHEMBL21	Nc1ccc(cc1)S(=O)(=O)N	IC50	=	Not Active	-1	MAP kinase ERK2	Sub-train	-1	0.899601	0.100399	In
Cpd1758	CHEMBL3654846	Fc1ccc(cc1)c2n[nH]c3cc(NC(=O)NCCC4CCOC4)ncc23	IC50	=	1.677	1	MAP kinase ERK2	Sub-train	1	0.088244	0.911756	In
Cpd1759	CHEMBL3654849	Fc1ccc(cc1)c2n[nH]c3cc(NC(=O)NCc4oncc4)ncc23	IC50	=	0.9946	1	MAP kinase ERK2	Sub-train	1	0.0463743	0.953626	In
Cpd1762	CHEMBL4113457	COc1n[nH]c2cc(NC(=O)N[C@H](C)c3ccccc3)nc(CO[C@@H]4CCC[C@@H]4O)c12	IC50	=	49.4	1	MAP kinase ERK2	Sub-train	1	0.056097	0.943903	In
Cpd1763	CHEMBL3409588	OC[C@@H](N1C=CC(=CC1=O)c2ccnc(NC3CCOCC3)n2)c4ccc(Cl)c(F)c4	IC50	=	3.9	1	MAP kinase ERK2	Sub-train	1	0.288479	0.711521	In
Cpd1764	CHEMBL3675702	OC[C@@H](N1C=CC(=CC1=O)c2ccnc(N[C@@H]3CCOC[C@H]3F)n2)c4ccc(Cl)c(F)c4	IC50	=	4	1	MAP kinase ERK2	Test	1	0.214773	0.785227	In
Cpd1765	CHEMBL3675704	OC[C@@H](N1N=CC(=CC1=O)c2ccnc(NC3CCOCC3)n2)c4ccc(Cl)c(F)c4	IC50	=	13.6	1	MAP kinase ERK2	Sub-train	1	0.436972	0.563028	In
Cpd1766	CHEMBL3409594	OCC(N1C=CC(=NC1=O)c2ccnc(NC3CCOCC3)n2)c4ccc(Cl)c(F)c4	IC50	=	15.6	1	MAP kinase ERK2	Test	1	0.0478004	0.9522	In
Cpd1767	CHEMBL4115481	COc1n[nH]c2cc(NC(=O)N[C@H](c3ccc(F)c(F)c3)C(C)(C)O)nc(CO)c12	IC50	=	182.9	1	MAP kinase ERK2	Sub-train	1	0.09554	0.90446	In
Cpd1768	CHEMBL3654837	CN1C[C@H](NC(=O)Nc2cc3[nH]nc(c4ccnc(C)c4)c3cn2)[C@H](C1)C5CCOCC5	IC50	=	96.81	1	MAP kinase ERK2	Sub-train	1	0.128569	0.871431	In
Cpd1769	CHEMBL3654841	CN1C[C@@H](NC(=O)Nc2cc3[nH]nc(c4ccc(F)cc4)c3cn2)[C@@H](C1)c5ccccc5	IC50	=	0.3938	1	MAP kinase ERK2	Sub-train	1	0.00897012	0.99103	In
Cpd1770	CHEMBL3963644	Fc1cc(CNC(=O)c2ccc3cnc(NC4CCOCC4)cc3n2)ccc1Cl	IC50	=	3.43	1	MAP kinase ERK2	Sub-train	1	0.0914845	0.908516	In
Cpd1771	CHEMBL3948377	Cc1nc(NC(=O)N[C@@H](c2ccc(F)cc2)C(C)(C)O)cc3[nH]nc(N4CCC4)c13	IC50	=	1.3	1	MAP kinase ERK2	Sub-train	1	0.0896469	0.910353	In
Cpd1772	CHEMBL3903344	Fc1cc(CCNC(=O)c2ccc3cnc(NC4CCOCC4)cc3n2)ccc1Cl	IC50	=	5.95	1	MAP kinase ERK2	Sub-train	1	0.0733876	0.926612	In
Cpd1773	CHEMBL4113148	OC[C@@H](NC(=O)Nc1cc2[nH]nc(OC[C@H](O)C(F)(F)F)c2cn1)c3ccccc3	IC50	=	0.5	1	MAP kinase ERK2	Sub-train	1	0.0417212	0.958279	In
Cpd1774	CHEMBL4110157	COc1n[nH]c2cc(NC(=O)N[C@@H]3CN(C)[C@@H](C(F)F)[C@H]3c4ccccc4)ncc12	IC50	=	213.7	1	MAP kinase ERK2	Sub-train	1	0.040271	0.959729	In
Cpd1775	CHEMBL4113966	COc1n[nH]c2cc(NC(=O)N[C@H](CSC)c3ccccc3)ncc12	IC50	=	3.8	1	MAP kinase ERK2	Test	1	0.111655	0.888345	In
Cpd1776	CHEMBL4109102	COc1n[nH]c2cc(NC(=O)N[C@H](C)c3ccccc3)nc(CN4CCCC4=O)c12	IC50	=	140	1	MAP kinase ERK2	Sub-train	1	0.155109	0.844891	In
Cpd1777	CHEMBL3965054	COc1n[nH]c2cc(NC(=O)NC(C)c3ccc(F)c(F)c3)ncc12	IC50	=	77.9	1	MAP kinase ERK2	Sub-train	1	0.0548376	0.945162	In
Cpd1778	CHEMBL4109902	C[C@@H](NC(=O)Nc1cc2[nH]nc(OCCN(C)C)c2cn1)c3ccccc3	IC50	=	100.7	1	MAP kinase ERK2	Sub-train	1	0.0780466	0.921953	In
Cpd1779	CHEMBL4110670	C[C@@H](NC(=O)Nc1cc2[nH]nc(OCC(O)CO)c2cn1)c3ccccc3	IC50	=	1.9	1	MAP kinase ERK2	Sub-train	1	0.0322558	0.967744	In
Cpd1780	CHEMBL4113603	C[C@@H](NC(=O)Nc1cc2[nH]nc(OCC(O)CF)c2cn1)c3ccccc3	IC50	=	3.1	1	MAP kinase ERK2	Test	1	0.0300489	0.969951	In
Cpd1781	CHEMBL4110724	COCCOc1n[nH]c2cc(NC(=O)N[C@H](C)c3ccccc3)nc(CO)c12	IC50	=	0.3	1	MAP kinase ERK2	Sub-train	1	0.111232	0.888768	In
Cpd1782	CHEMBL4112404	COC(=O)Nc1n[nH]c2cc(NC(=O)N[C@H](C)c3ccc(F)cc3)ncc12	IC50	=	2.6	1	MAP kinase ERK2	Sub-train	1	0.0324378	0.967562	In
Cpd1783	CHEMBL3947798	COC[C@H](NC(=O)Nc1ncc2c(NC(C)C)n[nH]c2c1F)c3ccccc3	IC50	=	4.1	1	MAP kinase ERK2	Sub-train	1	0.132946	0.867054	In
Cpd1784	CHEMBL4113227	CC(C)Nc1n[nH]c2cc(NC(=O)N[C@H](C)c3ccccc3)ncc12	IC50	=	1.5	1	MAP kinase ERK2	Test	1	0.0621827	0.937817	In
Cpd1785	CHEMBL4112471	COC[C@@H](NC(=O)Nc1cc2[nH]nc(NC3CCOCC3)c2cn1)c4ccccc4	IC50	=	0.8	1	MAP kinase ERK2	Sub-train	1	0.0536497	0.94635	In
Cpd1786	CHEMBL3658774	Cc1cc(ccn1)c2n[nH]c3cc(NC(=O)NCC4CCN(Cc5ccccc5)C4)ncc23	IC50	=	2.646	1	MAP kinase ERK2	Sub-train	1	0.010956	0.989044	In
Cpd1789	CHEMBL3658835	Cc1cc(ccn1)c2n[nH]c3cc(NC(=O)NCc4nc(N)cs4)ncc23	IC50	=	2.695	1	MAP kinase ERK2	Test	1	0.0325789	0.967421	In
Cpd1793	CHEMBL3658660	C[C@@H](NC(=O)Nc1cc2[nH]nc(c3cnc(nc3)N(C)S(=O)(=O)C)c2cn1)c4ccccc4	IC50	=	3.597	1	MAP kinase ERK2	Sub-train	1	0.334447	0.665553	In
Cpd1794	CHEMBL3658667	COC[C@@H](NC(=O)Nc1cc2[nH]nc(c3cnc(OC)nc3)c2cn1)c4ccc(F)cc4	IC50	=	1.159	1	MAP kinase ERK2	Test	1	0.0199348	0.980065	In
Cpd1795	CHEMBL3658692	COC[C@@H](NC(=O)Nc1cc2[nH]nc(c3ccnc(C)c3)c2cn1)c4ccc(F)cc4	IC50	=	0.223	1	MAP kinase ERK2	Sub-train	1	0.0140789	0.985921	In
Cpd1796	CHEMBL3658694	Cc1cc(ccn1)c2n[nH]c3cc(NC(=O)N[C@@H]4CCN(CC(F)(F)F)C4)ncc23	IC50	=	3.539	1	MAP kinase ERK2	Sub-train	1	0.136625	0.863375	In
Cpd1797	CHEMBL3658647	Cc1cc(ccn1)c2n[nH]c3cc(NC(=O)NC4CCN(c5ccccc45)S(=O)(=O)C)ncc23	IC50	=	1.348	1	MAP kinase ERK2	Test	1	0.401857	0.598143	In
Cpd1802	CHEMBL3658718	Cc1cc(ccn1)c2n[nH]c3cc(NC(=O)NC(CF)c4ccccc4)ncc23	IC50	=	0.4741	1	MAP kinase ERK2	Sub-train	1	0.011909	0.988091	In
Cpd1805	CHEMBL4110414	C[C@@H](NC(=O)Nc1cc2[nH]nc(NC(=O)C3CCOCC3)c2cn1)c4ccccc4	IC50	=	4.3	1	MAP kinase ERK2	Sub-train	1	0.0374589	0.962541	In
Cpd1806	CHEMBL3921562	COCCOc1n[nH]c2cc(NC(=O)NCCN3CCC(CC3)c4ccccc4)ncc12	IC50	=	1680	-1	MAP kinase ERK2	Sub-train	1	0.0237258	0.976274	In
Cpd1807	CHEMBL3919166	COCCOc1n[nH]c2cc(NC(=O)NCc3ccccc3)ncc12	IC50	=	10.44	1	MAP kinase ERK2	Sub-train	1	0.0685317	0.931468	In
Cpd1808	CHEMBL4107232	COCCOc1n[nH]c2cc(NC(=O)N[C@H](C)c3ccc(F)cc3)ncc12	IC50	=	2.59	1	MAP kinase ERK2	Sub-train	1	0.0541672	0.945833	In
Cpd1811	CHEMBL3658809	Cc1cc(ccn1)c2n[nH]c3cc(NC(=O)NCc4cccnn4)ncc23	IC50	=	3.301	1	MAP kinase ERK2	Test	1	0.0223696	0.97763	In
Cpd1812	CHEMBL3658820	Cc1cc(ccn1)c2n[nH]c3cc(NC(=O)NCC4CCCO4)ncc23	IC50	=	8.455	1	MAP kinase ERK2	Sub-train	1	0.0933129	0.906687	In
Cpd1814	CHEMBL3937632	CC(C)(O)[C@@H](NC(=O)Nc1cc2[nH]nc(NC(=O)N3CCC(F)(F)C3)c2cn1)c4ccc(F)cc4	IC50	=	1.5	1	MAP kinase ERK2	Sub-train	1	0.0436604	0.95634	In
Cpd1815	CHEMBL3916271	COC(=O)C1C[C@H](CN1)c2cnc(N)c(c2)c3ccc(C(=O)N[C@H](CO)c4ccccc4)c(F)c3	IC50	=	30.6	1	MAP kinase ERK2	Sub-train	1	0.176356	0.823644	In
Cpd1818	CHEMBL245416	N[C@@H](CN1C=CC(=O)C(=C1)O)C(=O)O	IC50	=	Not Active	-1	MAP kinase ERK2	Sub-train	-1	0.996814	0.00318572	In
Cpd1820	CHEMBL4111742	CNc1n[nH]c2cc(NC(=O)N[C@H](C)c3ccc(Cl)cc3)ncc12	IC50	=	7.8	1	MAP kinase ERK2	Test	1	0.0281506	0.971849	In
Cpd1821	CHEMBL4109579	C[C@@H](NC(=O)Nc1cc2[nH]nc(N3CCN(C)CC3)c2cn1)c4ccccc4	IC50	=	27.99	1	MAP kinase ERK2	Sub-train	1	0.0949024	0.905098	In
Cpd1824	CHEMBL4108734	C[C@@H](NC(=O)c1ccc(cc1F)c2cc(cnc2N)C3CC3)c4cc(F)cc(c4)S(=O)(=O)C	IC50	=	2.03	1	MAP kinase ERK2	Sub-train	1	0.0976376	0.902362	In
Cpd1826	CHEMBL4110081	CC(C)n1cc(cn1)c2cnc(N)c(c2)c3ccc(C(=O)N[C@H](CO)c4cccc(c4)S(=O)(=O)C)c(F)c3	IC50	=	1.48	1	MAP kinase ERK2	Sub-train	1	0.169894	0.830106	In
Cpd1828	CHEMBL1221512	CC[C@H](C)[C@@H](CO[C@@H](Cc1ccccc1)C(=O)N[C@@H](CCS(=O)(=O)C)C(=O)OC(C)C)NC[C@@H](N)CS	IC50	=	Not Active	-1	MAP kinase ERK2	Sub-train	-1	0.707578	0.292422	In
Cpd1829	CHEMBL4110982	C[C@@H](NC(=O)Nc1cc2[nH]nc(NC3CCC3)c2cn1)c4ccccc4	IC50	=	1.5	1	MAP kinase ERK2	Sub-train	1	0.0305285	0.969472	In
Cpd1831	CHEMBL4112761	COc1n[nH]c2cc(NC(=O)N[C@H](C)c3ccc(Cl)c(F)c3)nc(CO)c12	IC50	=	1.6	1	MAP kinase ERK2	Sub-train	1	0.0623344	0.937666	In
Cpd1832	CHEMBL4110959	CCO[C@@H]1CN(C)C[C@H]1NC(=O)Nc2cc3[nH]nc(OC)c3c(CO)n2	IC50	=	39.8	1	MAP kinase ERK2	Sub-train	-1	0.594215	0.405785	In
Cpd1834	CHEMBL3943007	CS(=O)(=O)c1cc(Cl)cc(CNC(=O)c2ccc(cc2F)c3nc(cnc3N)C4CC4)c1	IC50	=	26.6	1	MAP kinase ERK2	Test	1	0.23882	0.76118	In
Cpd1835	CHEMBL3658826	Cc1cc(ccn1)c2n[nH]c3cc(NC(=O)NCC4COCCO4)ncc23	IC50	=	3.572	1	MAP kinase ERK2	Sub-train	1	0.131576	0.868424	In
Cpd1842	CHEMBL606964	COc1ccc(cc1)N2Cc3cnc(Nc4ccc(F)cc4)nc3N([C@@H]5CC[C@@H](O)C5)C2=O	IC50	=	12600	-1	MAP kinase ERK2	Sub-train	1	0.0760218	0.923978	In
Cpd1844	CHEMBL1287886	COC(=O)c1n[nH]cc1NC(=O)Cc2cccc3ccccc23	IC50	>	50000	-1	MAP kinase ERK2	Test	1	0.420009	0.579991	In
Cpd1849	CHEMBL3654825	CN1CCOC(CNC(=O)Nc2cc3[nH]nc(c4ccnc(C)c4)c3cn2)C1	IC50	=	5.949	1	MAP kinase ERK2	Sub-train	1	0.165085	0.834915	In
Cpd1853	CHEMBL3663096	COc1cccc(F)c1CN2CCC[C@H](C2)NC(=O)Nc3cc4[nH]nc(c5ccc(F)cc5)c4cn3	IC50	=	2.201	1	MAP kinase ERK2	Sub-train	1	0.00739445	0.992606	In
Cpd1854	CHEMBL3663099	COc1cc(ccn1)c2n[nH]c3cc(NC(=O)N[C@H](C)c4ccccc4)ncc23	IC50	=	0.9282	1	MAP kinase ERK2	Sub-train	1	0.0133969	0.986603	In
Cpd1855	CHEMBL3663105	CC(F)(F)c1n[nH]c2cc(NC(=O)NCc3ccccc3)ncc12	IC50	=	259.4	1	MAP kinase ERK2	Sub-train	1	0.0394586	0.960541	In
Cpd1856	CHEMBL4114549	C[C@@H](NC(=O)Nc1cc2[nH]nc(OCC3CC3)c2cn1)c4ccccc4	IC50	=	8.73	1	MAP kinase ERK2	Sub-train	1	0.0339601	0.96604	In
Cpd1862	CHEMBL3695636	CCNC(=O)Nc1ccc2ncc(Nc3ccn(C)n3)nc2n1	IC50	=	13700	-1	MAP kinase ERK2	Sub-train	1	0.384612	0.615388	In
Cpd1863	CHEMBL3695637	CCNC(=O)Nc1ccc2ncc(Nc3ccc(F)cc3)nc2n1	IC50	>	100000	-1	MAP kinase ERK2	Test	1	0.0849976	0.915002	In
Cpd1866	CHEMBL4113863	C[C@@H](NC(=O)Nc1cc2[nH]nc(N)c2cn1)c3cccc(Cl)c3	IC50	=	5.6	1	MAP kinase ERK2	Sub-train	1	0.0235597	0.97644	In
Cpd1867	CHEMBL3695619	CCN(C(=O)C)C(=O)Nc1ccc2ncc(nc2n1)c3ccccc3	IC50	=	9500	-1	MAP kinase ERK2	Test	1	0.214428	0.785572	In
Cpd1868	CHEMBL3654805	C[C@@H](NC(=O)Nc1cc2[nH]nc(c3ccnc(C)c3)c2cn1)c4ccccn4	IC50	=	0.9142	1	MAP kinase ERK2	Sub-train	1	0.0206401	0.97936	In
Cpd1869	CHEMBL3654807	CN1C[C@H](NC(=O)Nc2cc3[nH]nc(c4ccnc(C)c4)c3cn2)[C@H](C1)c5ccc(F)nc5	IC50	=	1.452	1	MAP kinase ERK2	Sub-train	1	0.0173626	0.982637	In
Cpd1875	CHEMBL569880	COCCOc1cc2ncnc(Nc3ccc(F)c(Cl)c3F)c2cc1NC(=O)[C@@H]4CCCN4C(=O)C=C	IC50	>	10000	-1	MAP kinase ERK2	Sub-train	1	0.482102	0.517898	In
Cpd1878	CHEMBL3695657	CCNC(=O)Nc1ccc2ncc(nc2n1)c3cccc(O)c3	IC50	=	1000	-1	MAP kinase ERK2	Test	1	0.0785902	0.92141	In
Cpd1880	CHEMBL1272171	CC(C)c1n[nH]c(c1c2ccnc(Nc3ccc(cn3)N4CCC(CC4)N(C)C)n2)C(F)(F)F	IC50	>	10000	-1	MAP kinase ERK2	Sub-train	-1	0.963233	0.0367666	In
Cpd1882	CHEMBL4109612	CNc1n[nH]c2cc(NC(=O)N[C@H](C)c3ccc(F)cc3)ncc12	IC50	=	7.85	1	MAP kinase ERK2	Sub-train	1	0.0466673	0.953333	In
Cpd1883	CHEMBL4115316	CNc1n[nH]c2cc(NC(=O)N[C@H](C)c3ccccc3)ncc12	IC50	=	4.87	1	MAP kinase ERK2	Sub-train	1	0.0495604	0.95044	In
Cpd1884	CHEMBL4114989	CCNc1n[nH]c2cc(NC(=O)N[C@H](C)c3ccccn3)ncc12	IC50	=	19.47	1	MAP kinase ERK2	Sub-train	1	0.0991481	0.900852	In
Cpd1885	CHEMBL4110699	COC[C@@H](NC(=O)Nc1cc2[nH]nc(N3CC(C3)OC)c2cn1)c4ccccc4	IC50	=	2295	-1	MAP kinase ERK2	Sub-train	1	0.0746453	0.925355	In
Cpd1886	CHEMBL3663036	Cc1cc(ccn1)c2n[nH]c3cc(NC(=O)N[C@@H]4C[C@H]4c5ccccc5)ncc23	IC50	=	0.9168	1	MAP kinase ERK2	Sub-train	1	0.00889511	0.991105	In
Cpd1887	CHEMBL3663038	COC(C)CNC(=O)Nc1cc2[nH]nc(c3ccnc(C)c3)c2cn1	IC50	=	1.257	1	MAP kinase ERK2	Test	1	0.111717	0.888283	In
Cpd1888	CHEMBL3663041	Cc1cc(ccn1)c2n[nH]c3cc(NC(=O)NCC4COC4)ncc23	IC50	=	30.9	1	MAP kinase ERK2	Test	1	0.357518	0.642482	In
Cpd1890	CHEMBL3663047	CN1CC[C@H](C1)NC(=O)Nc2cc3[nH]nc(c4ccnc(C)c4)c3cn2	IC50	=	4.872	1	MAP kinase ERK2	Sub-train	1	0.149726	0.850274	In
Cpd1891	CHEMBL3654875	C[C@@H](NC(=O)Nc1cc2[nH]nc(c3ccc(nc3)c4nc(C)cs4)c2cn1)c5ccc(F)cc5	IC50	=	1258	-1	MAP kinase ERK2	Sub-train	1	0.0108706	0.989129	In
Cpd1893	CHEMBL3654786	CCCCNC(=O)Nc1cc2[nH]nc(C3CC3)c2cn1	IC50	=	42.24	1	MAP kinase ERK2	Sub-train	1	0.329055	0.670945	In
Cpd1894	CHEMBL4112491	CC(CO)Nc1ncc2ccc(cc2n1)C(=O)N[C@@H](c3ccc(Cl)c(F)c3)c4cnn(C)c4	IC50	=	1.2	1	MAP kinase ERK2	Sub-train	1	0.127638	0.872362	In
Cpd1895	CHEMBL4107112	Cn1ccc(n1)[C@H](NC(=O)c2ccc3cnc(NC4CCOCC4)nc3c2)c5ccc(Cl)c(F)c5	IC50	=	69	1	MAP kinase ERK2	Sub-train	1	0.0941433	0.905857	In
Cpd1896	CHEMBL3662996	COC[C@H](NC(=O)Nc1cc2[nH]nc(c3ccc(F)cc3)c2cn1)c4ccccc4	IC50	=	305.8	1	MAP kinase ERK2	Sub-train	1	0.0111468	0.988853	In
Cpd1898	CHEMBL3895057	NC[C@@H](NC(=O)c1ccc(cc1F)c2nc(cnc2N)C3CCOCC3)c4cc(F)cc(Br)c4	IC50	=	0.00671	1	MAP kinase ERK2	Sub-train	1	0.0281566	0.971843	In
Cpd1899	CHEMBL3662963	Cc1cc(ccn1)c2n[nH]c3cc(NC(=O)NC4CCc5[nH]nc(C)c5C4)ncc23	IC50	=	0.7618	1	MAP kinase ERK2	Sub-train	1	0.0153027	0.984697	In
Cpd1900	CHEMBL3662964	Cc1cc(ccn1)c2n[nH]c3cc(NC(=O)NCc4ccc[n+]([O-])c4)ncc23	IC50	=	11.58	1	MAP kinase ERK2	Sub-train	1	0.0418289	0.958171	In
Cpd1902	CHEMBL3937459	Nc1ncc(nc1c2ccc(C(=O)N[C@H](CO)c3cc(F)cc(Br)c3)c(F)c2)[C@@H]4CC[C@H](O)[C@H](F)C4	IC50	=	0.924	1	MAP kinase ERK2	Sub-train	1	0.012114	0.987886	In
Cpd1904	CHEMBL399168	CNc1nccc(n1)C(C#N)c2nc3ccccc3s2	IC50	>	30000	-1	MAP kinase ERK2	Sub-train	-1	0.911162	0.0888379	In
Cpd1905	CHEMBL3909574	OCCNc1nccc(n1)C(C#N)c2nc3ccccc3s2	IC50	>	30000	-1	MAP kinase ERK2	Test	-1	0.888194	0.111806	In
Cpd1911	CHEMBL520871	Cc1ccc(COc2ccc(c(O)c2)c3n[nH]cc3c4ccccc4)cc1	IC50	=	16900	-1	MAP kinase ERK2	Sub-train	1	0.154091	0.845909	In
Cpd1914	CHEMBL3663025	CSC[C@@H](NC(=O)Nc1cc2[nH]nc(c3ccnc(C)c3)c2cn1)c4ccccc4	IC50	=	0.2569	1	MAP kinase ERK2	Sub-train	1	0.0112099	0.98879	In
Cpd1923	CHEMBL4112506	Cc1nn(C)cc1c2cnc(N)c(c2)c3ccc(C(=O)N[C@H](CO)c4cc(F)cc(c4)C(F)F)c(F)c3	IC50	=	0.0467	1	MAP kinase ERK2	Sub-train	1	0.0394029	0.960597	In
Cpd1924	CHEMBL4114641	Cc1c(cnn1C)c2cnc(N)c(c2)c3ccc(C(=O)N[C@H](CO)c4cc(F)cc(c4)C(F)F)c(F)c3	IC50	=	0.0308	1	MAP kinase ERK2	Sub-train	1	0.0324301	0.96757	In
Cpd1925	CHEMBL4108313	NC[C@@H](NC(=O)c1ccc(cc1F)c2nc(cnc2N)C3CCOCC3)c4cccc(Br)c4	IC50	=	0.02	1	MAP kinase ERK2	Sub-train	1	0.025878	0.974122	In
Cpd1930	CHEMBL4112430	Nc1ncc(nc1c2ccc(C(=O)N[C@H](CO)c3cccc(Br)c3)c(F)c2)[C@@H]4CC[C@@H](O)CC4	IC50	=	0.0485	1	MAP kinase ERK2	Test	1	0.0167104	0.98329	In
Cpd1932	CHEMBL3398595	COc1ccc(cc1)c2ccc(cc2)N3CCN(CC3)C(=O)CN4CC[C@H](C4)C(=O)Nc5ccc(O)c(Cl)c5	IC50	=	50000	-1	MAP kinase ERK2	Sub-train	1	0.302913	0.697087	In
Cpd1936	CHEMBL3930522	NC[C@@H](NC(=O)c1ccc(cc1F)c2nc(cnc2N)[C@H]3CC[C@H](O)[C@H](F)C3)c4cc(F)cc(Br)c4	IC50	=	0.0194	1	MAP kinase ERK2	Sub-train	1	0.0127222	0.987278	In
Cpd1937	CHEMBL4114300	Nc1ncc(nc1c2ccc(C(=O)N[C@H](CO)c3cc(F)cc(Br)c3)c(F)c2)[C@@H]4CC[C@@H](O)[C@H](O)C4	IC50	=	0.0187	1	MAP kinase ERK2	Sub-train	1	0.014342	0.985658	In
Cpd1938	CHEMBL4110007	Cn1cc(cn1)[C@@H](NC(=O)c2ccc3cnc(N[C@@H]4CCO[C@H](CO)C4)nc3c2)c5ccc(Cl)c(F)c5	IC50	=	1.4	1	MAP kinase ERK2	Sub-train	1	0.071291	0.928709	In
Cpd1939	CHEMBL3654738	C[C@@H](NC(=O)Nc1cc2[nH]nc(c3ccc4nc(C)sc4c3)c2cn1)c5ccccc5	IC50	=	0.7479	1	MAP kinase ERK2	Sub-train	1	0.014034	0.985966	In
Cpd1940	CHEMBL3658757	Cc1cc(ccn1)c2n[nH]c3cc(NC(=O)NCc4cn5cccc(C)c5n4)ncc23	IC50	=	13.84	1	MAP kinase ERK2	Sub-train	1	0.015878	0.984122	In
Cpd1942	CHEMBL3658771	Cc1cc(ccn1)c2n[nH]c3cc(NC(=O)NC4CC(=O)Nc5ccccc45)ncc23	IC50	=	5.725	1	MAP kinase ERK2	Sub-train	1	0.0129534	0.987047	In
Cpd1943	CHEMBL3658829	Cc1cc(ccn1)c2n[nH]c3cc(NC(=O)NC4COc5ccccc5C4)ncc23	IC50	=	1.253	1	MAP kinase ERK2	Sub-train	1	0.0115868	0.988413	In
Cpd1944	CHEMBL3658707	C[C@@H](NC(=O)Nc1cc2[nH]nc(c3ccnc(C)c3)c2cn1)c4ccc(Cl)c(C)c4	IC50	=	2.914	1	MAP kinase ERK2	Sub-train	1	0.00565998	0.99434	In
Cpd1945	CHEMBL3921309	C[C@@H](NC(=O)c1ccc(cc1F)c2cc(cnc2N)[C@H]3CCC(=O)N(C)C3)c4cccc(Cl)c4	IC50	=	2.48	1	MAP kinase ERK2	Test	1	0.13341	0.86659	In
Cpd1956	CHEMBL208048	COc1cc2ncnc(Nc3cccc(Cl)c3F)c2cc1CN(C(C)C)[C@@H](C)C(=O)N	IC50	>	10000	-1	MAP kinase ERK2	Sub-train	-1	0.529263	0.470737	In
Cpd1957	CHEMBL208118	COc1cc2ncnc(Nc3cccc(Cl)c3F)c2cc1CN(C)[C@H](C)C(=O)N	IC50	>	10000	-1	MAP kinase ERK2	Sub-train	-1	0.625223	0.374777	In
Cpd1958	CHEMBL208292	COc1cc2ncnc(Nc3cccc(Cl)c3F)c2cc1CN4CCC[C@@H]4C(=O)N	IC50	>	10000	-1	MAP kinase ERK2	Sub-train	1	0.49864	0.50136	In
Cpd1959	CHEMBL207584	COc1cc2ncnc(Nc3cccc(Cl)c3F)c2cc1CN4CCC[C@H]4C(=O)N	IC50	>	10000	-1	MAP kinase ERK2	Sub-train	1	0.49864	0.50136	In
Cpd1962	CHEMBL30	CN\C(=N\CCSCc1nc[nH]c1C)\NC#N	IC50	=	Not Active	-1	MAP kinase ERK2	Sub-train	-1	0.997699	0.00230059	In
Cpd1964	CHEMBL215803	C[C@@H]1C[C@H]2CN1CCn3nc4c(cccc4c3O)c5nc6c(O2)cccc6nc5O	IC50	>	1000	-1	MAP kinase ERK2	Sub-train	-1	0.90018	0.0998204	In
Cpd1965	CHEMBL3589656	OC(=O)c1nc2ccccc2c3[nH]c4ccc(cc4c13)[N+](=O)[O-]	IC50	>	10000	-1	MAP kinase ERK2	Test	-1	0.814164	0.185836	In
Cpd1971	CHEMBL3590119	CCC(=O)Nc1ccccc1Nc2nc(NC3CCOCC3)ncc2Cl	IC50	=	4000	-1	MAP kinase ERK2	Sub-train	-1	0.628236	0.371764	In
Cpd1975	CHEMBL519113	C[C@@H](NC1=C(Nc2ccnc(c2)c3occc3)C(=O)C1=O)c4ccccc4	IC50	=	35000	-1	MAP kinase ERK2	Sub-train	1	0.319089	0.680911	In
Cpd1978	CHEMBL1909073	[Br-].CC[N+]1(CCOC(=O)C(O)(c2ccccc2)c3ccccc3)CCCCC1	IC50	=	Not Active	-1	MAP kinase ERK2	Sub-train	-1	0.984331	0.0156686	In
Cpd1986	CHEMBL894	CC(NC(C)(C)C)C(=O)c1cccc(Cl)c1	IC50	=	Not Active	-1	MAP kinase ERK2	Sub-train	-1	0.983711	0.0162891	In
Cpd1987	CHEMBL1535	CCN(CCO)CCCC(C)Nc1ccnc2cc(Cl)ccc12	IC50	=	Not Active	-1	MAP kinase ERK2	Sub-train	-1	0.907129	0.0928708	In
Cpd1988	CHEMBL1909049	COc1ccccc1C(=O)N2CCC(Cc3ccccc3)CC2	IC50	=	Not Active	-1	MAP kinase ERK2	Sub-train	-1	0.813296	0.186704	In
Cpd1989	CHEMBL488	CCC1(CCC(=O)NC1=O)c2ccc(N)cc2	IC50	=	Not Active	-1	MAP kinase ERK2	Sub-train	-1	0.995076	0.00492444	In
Cpd1991	CHEMBL1201146	CC(=O)O[C@]1(CC[C@H]2[C@@H]3CCC4=CC(=O)CC[C@@H]4[C@H]3CC[C@]12C)C#C	IC50	=	Not Active	-1	MAP kinase ERK2	Test	-1	0.7438	0.2562	In
Cpd1992	CHEMBL190984	CN(C)CCNc1cncc(c1)c2cncc(Nc3cccc(Cl)c3)n2	IC50	>	10000	-1	MAP kinase ERK2	Sub-train	-1	0.710446	0.289554	In
Cpd1993	CHEMBL12131	Cc1cc(C(C#N)c2ccc(Cl)cc2)c(Cl)cc1NC(=O)c3cc(I)cc(I)c3O	IC50	=	1428	-1	MAP kinase ERK2	Sub-train	-1	0.962114	0.0378864	In
Cpd1995	CHEMBL23	COc1ccc(cc1)[C@@H]2Sc3ccccc3N(CCN(C)C)C(=O)[C@@H]2OC(=O)C	IC50	=	Not Active	-1	MAP kinase ERK2	Sub-train	-1	0.983205	0.0167955	In
Cpd1996	CHEMBL415	CN(C)CCCN1c2ccccc2CCc3ccc(Cl)cc13	IC50	=	Not Active	-1	MAP kinase ERK2	Sub-train	-1	0.994112	0.00588816	In
Cpd1997	CHEMBL383246	COc1cc2ncnc(Nc3cccc(Cl)c3F)c2cc1CN(C)C4(CCN(CC4)C(C)C)C(=O)N	IC50	>	10000	-1	MAP kinase ERK2	Sub-train	1	0.397537	0.602463	In
Cpd1998	CHEMBL208286	COc1cc2ncnc(Nc3cccc(Cl)c3F)c2cc1CN(C)[C@@H](CO)C(=O)N	IC50	>	10000	-1	MAP kinase ERK2	Sub-train	-1	0.609279	0.390721	In
Cpd2002	CHEMBL383172	Cc1ccc(cc1Nc2ncnc(NC3CCCC3)c2C#N)C(=O)Nc4ccon4	IC50	>	5000	-1	MAP kinase ERK2	Sub-train	1	0.141638	0.858362	In
Cpd2003	CHEMBL188386	OCCCCNc1cncc(c1)c2cncc(Nc3cccc(Cl)c3)n2	IC50	>	10000	-1	MAP kinase ERK2	Sub-train	-1	0.5378	0.4622	In
Cpd2004	CHEMBL1200633	CC[C@H](C)[C@H]1O[C@]2(CC[C@@H]1C)C[C@@H]3C[C@@H](C\C=C(/C)\[C@@H](O[C@H]4C[C@H](OC)[C@@H](O[C@H]5C[C@H](OC)[C@@H](O)[C@H](C)O5)[C@H](C)O4)[C@@H](C)\C=C\C=C\6/CO[C@@H]7[C@H](O)C(=C[C@@H](C(=O)O3)[C@]67O)C)O2.CO[C@H]8C[C@H](O[C@H]9[C@H](C)O[C@H](C[C@@H]9OC)O[C@H]%10[C@@H](C)\C=C\C=C\%11/CO[C@@H]%12[C@H](O)C(=C[C@@H](C(=O)O[C@H]%13C[C@@H](C\C=C\%10/C)O[C@@]%14(CC[C@H](C)[C@H](O%14)C(C)C)C%13)[C@]%1…	IC50	=	Not Active	-1	MAP kinase ERK2	Test	-1	0.954755	0.0452453	In
Cpd2006	CHEMBL40	CCC1(C(=O)NC(=O)NC1=O)c2ccccc2	IC50	=	Not Active	-1	MAP kinase ERK2	Sub-train	-1	0.995724	0.00427553	In
Cpd2008	CHEMBL3628378	CCCn1cc(cn1)c2c[nH]c3ncc(nc23)c4ccncc4	IC50	=	71	1	MAP kinase ERK2	Sub-train	-1	0.93122	0.0687797	In
Cpd2011	CHEMBL3604854	Fc1ccc(CN2C=CC(=CC2=O)N3CCc4[nH]nc(c4C3)c5ccncc5)cc1	IC50	=	1.8	1	MAP kinase ERK2	Sub-train	1	0.169328	0.830672	In
Cpd2012	CHEMBL1433	C[C@@H]1[C@H]2[C@H](O)[C@H]3[C@H](N(C)C)C(=C(C(=O)N)C(=O)[C@@]3(O)C(=C2C(=O)c4c(O)cccc14)O)O	IC50	=	Not Active	-1	MAP kinase ERK2	Sub-train	-1	0.99664	0.00336029	In
Cpd2013	CHEMBL175	CC(C)Cc1ccc(cc1)[C@H](C)C(=O)O	IC50	=	Not Active	-1	MAP kinase ERK2	Sub-train	-1	0.92524	0.0747599	In
Cpd2015	CHEMBL1201216	Cc1ccccc1N2CCN(CCc3nnc4CCCCn34)CC2	IC50	=	Not Active	-1	MAP kinase ERK2	Test	-1	0.838248	0.161752	In
Cpd2016	CHEMBL565	CCOC(=O)C(C)(C)Oc1ccc(Cl)cc1	IC50	=	Not Active	-1	MAP kinase ERK2	Sub-train	-1	0.966492	0.0335076	In
Cpd2022	CHEMBL1598608	CN1C(=O)COc2c1cc(Cl)cc2C(=O)NC3CN4CCC3CC4	IC50	=	Not Active	-1	MAP kinase ERK2	Test	-1	0.978934	0.0210661	In
Cpd2023	CHEMBL1256017	NC(=N)NCCCCNC(=N)N.OS(=O)(=O)O	IC50	=	Not Active	-1	MAP kinase ERK2	Test	-1	0.997892	0.00210835	In
Cpd2024	CHEMBL1822145	Fc1cc2C=CC(=O)N(CC(=O)Nc3scc(Br)c3c4ncn[nH]4)c2cc1F	IC50	>	50000	-1	MAP kinase ERK2	Sub-train	-1	0.958431	0.0415691	In
Cpd2026	CHEMBL376967	COc1cc2ncnc(Nc3cccc(Cl)c3F)c2cc1CN(CCN(C)C)[C@@H](C)C(=O)N	IC50	>	10000	-1	MAP kinase ERK2	Test	-1	0.749649	0.250351	In
Cpd2027	CHEMBL206783	COc1cc2ncnc(Nc3cccc(Cl)c3F)c2cc1CN4CCCC[C@@H]4C(=O)N	IC50	>	10000	-1	MAP kinase ERK2	Sub-train	1	0.474673	0.525327	In
Cpd2029	CHEMBL498847	CC(O)Cn1c(C)ncc1[N+](=O)[O-]	IC50	=	Not Active	-1	MAP kinase ERK2	Sub-train	-1	0.994504	0.00549617	In
Cpd2030	CHEMBL313493	COS(=O)(=O)C	IC50	=	Not Active	-1	MAP kinase ERK2	Sub-train	-1	0.998349	0.00165102	Outlier
Cpd2032	CHEMBL3	CN1CCC[C@H]1c2cccnc2	IC50	=	Not Active	-1	MAP kinase ERK2	Test	-1	0.960646	0.0393544	In
Cpd2033	CHEMBL852	N[C@@H](Cc1ccc(cc1)N(CCCl)CCCl)C(=O)O	IC50	=	Not Active	-1	MAP kinase ERK2	Sub-train	-1	0.930485	0.0695154	In
Cpd2035	CHEMBL1230813	OC[C@H]1O[C@@H]2O[C@H]3[C@H](O)[C@@H](O)[C@H](O[C@@H]3CO)O[C@H]4[C@H](O)[C@@H](O)[C@H](O[C@@H]4CO)O[C@H]5[C@H](O)[C@@H](O)[C@H](O[C@@H]5CO)O[C@H]6[C@H](O)[C@@H](O)[C@H](O[C@@H]6CO)O[C@H]7[C@H](O)[C@@H](O)[C@H](O[C@@H]7CO)O[C@H]1[C@H](O)[C@H]2O	IC50	=	Not Active	-1	MAP kinase ERK2	Sub-train	-1	0.727484	0.272516	In
Cpd2039	CHEMBL499815	[K+].[K+].CC(C)CC(=O)O[C@H]1[C@H](O[C@@H]2C[C@H]([C@H]3CC[C@@]45C[C@@H](CCC4[C@]3(C)C2)C(=C)[C@H]5O)C(=O)O)O[C@H](CO)[C@@H](OS(=O)(=O)[O-])[C@@H]1OS(=O)(=O)[O-]	IC50	=	Not Active	-1	MAP kinase ERK2	Test	-1	0.906471	0.0935285	Outside-AD
Cpd2040	CHEMBL127516	CCCCOC(=O)c1ccc(N)cc1	IC50	=	Not Active	-1	MAP kinase ERK2	Sub-train	-1	0.886435	0.113565	In
Cpd2042	CHEMBL1200558	CC[C@H](C)[C@H](N)C1=N[C@@H](CS1)C(=O)N[C@@H](CC(C)C)C(=O)N[C@H](CCC(=O)O)C(=O)N[C@@H]([C@@H](C)CC)C(=O)N[C@H]2CCCCNC(=O)[C@H](CC(=O)N)NC(=O)[C@@H](CC(=O)O)NC(=O)[C@H](Cc3cnc[nH]3)NC(=O)[C@@H](Cc4ccccc4)NC(=O)[C@@H](NC(=O)[C@@H](CCCN)NC2=O)[C@@H](C)CC	IC50	=	Not Active	-1	MAP kinase ERK2	Sub-train	-1	0.988147	0.0118529	Outlier
Cpd2044	CHEMBL3084803	CO[C@H]1[C@@H](O)[C@H](N)[C@@H](O[C@H]2O[C@@H](CC[C@H]2N)[C@H](C)N)[C@H](O)[C@@H]1N(C)C(=O)CN	IC50	=	Not Active	-1	MAP kinase ERK2	Sub-train	-1	0.994769	0.00523097	In
Cpd2045	CHEMBL1489	NC1=NC(=O)N(C=N1)[C@@H]2O[C@H](CO)[C@@H](O)[C@H]2O	IC50	=	Not Active	-1	MAP kinase ERK2	Sub-train	-1	0.997706	0.00229366	In
Cpd2046	CHEMBL24441	CNCCc1ccccn1	IC50	=	Not Active	-1	MAP kinase ERK2	Sub-train	-1	0.96955	0.0304496	In
Cpd2048	CHEMBL712	COc1ccc(cc1)C2C(=O)c3ccccc3C2=O	IC50	=	Not Active	-1	MAP kinase ERK2	Sub-train	-1	0.91209	0.08791	In
Cpd2049	CHEMBL395080	COc1cc(ccc1N)c2ccc3C(=O)Nc4cc(CC(=O)Nc5ccc(cc5)N6CCOCC6)ccc4Nc3c2	IC50	=	5000	-1	MAP kinase ERK2	Sub-train	1	0.0892095	0.910791	In
Cpd2052	CHEMBL388590	CCc1oc2ccccc2c1C(=O)c3cc(Br)c(O)c(Br)c3	IC50	=	1946	-1	MAP kinase ERK2	Sub-train	-1	0.925547	0.0744526	In
Cpd2053	CHEMBL398601	O=C(Nc1sc2CN(CCc2c1C#N)S(=O)(=O)c3ccccc3)c4cccc5ccccc45	IC50	>	10000	-1	MAP kinase ERK2	Sub-train	-1	0.70922	0.29078	In
Cpd2054	CHEMBL1201203	CN1[C@@H]2CC[C@H]1C[C@H](C2)OC(c3ccccc3)c4ccccc4	IC50	=	Not Active	-1	MAP kinase ERK2	Test	-1	0.841833	0.158167	In
Cpd2055	CHEMBL547	C\C(=C\C(=O)O)\C=C\C=C(/C)\C=C\C1=C(C)CCCC1(C)C	IC50	=	462	1	MAP kinase ERK2	Sub-train	-1	0.882464	0.117536	In
Cpd2056	CHEMBL707	COc1cc2nc(nc(N)c2cc1OC)N3CCN(CC3)C(=O)C4COc5ccccc5O4	IC50	=	Not Active	-1	MAP kinase ERK2	Test	1	0.438533	0.561467	In
Cpd2057	CHEMBL717	C[C@H]1C[C@@H]2[C@H](CC[C@@]3(C)[C@H]2CC[C@]3(OC(=O)C)C(=O)C)[C@@]4(C)CCC(=O)C=C14	IC50	=	Not Active	-1	MAP kinase ERK2	Test	-1	0.954222	0.0457783	In
Cpd2058	CHEMBL1230333	OC(=O)CCCc1cccs1	IC50	=	Not Active	-1	MAP kinase ERK2	Sub-train	-1	0.997939	0.00206124	In
Cpd2060	CHEMBL402794	CCCC[C@@H](CC)COC(=O)c1ccccc1C(=O)OC[C@@H](CC)CCCC	IC50	=	Not Active	-1	MAP kinase ERK2	Sub-train	-1	0.945456	0.0545437	In
Cpd2063	CHEMBL253376	CN(Cc1cc(Br)cc(Br)c1N)C2CCCCC2	IC50	=	Not Active	-1	MAP kinase ERK2	Test	-1	0.993043	0.0069567	In
Cpd2064	CHEMBL3577642	COc1ccc(NC(=O)COc2ccc(\C=C\3/N=C(N(C3=O)c4ccc(OC)cc4)c5ccccc5)cc2)cc1	IC50	=	2.3	1	MAP kinase ERK2	Test	1	0.399968	0.600032	In
Cpd2065	CHEMBL3577632	COc1ccc(NC(=O)COc2ccc(\C=C\3/N=C(N(C3=O)c4cccc(OC)c4)c5ccccc5)cc2)cc1	IC50	=	4.3	1	MAP kinase ERK2	Test	1	0.41786	0.58214	In
Cpd2066	CHEMBL3577635	COc1cccc(c1)N2C(=O)\C(=C\c3ccc(OCC(=O)Nc4ccc(Cl)cc4)cc3)\N=C2c5ccccc5	IC50	=	4.6	1	MAP kinase ERK2	Sub-train	1	0.301602	0.698398	In
Cpd2068	CHEMBL481248	C[C@@H](NC1=C(Nc2ccnc(c2)c3ccsc3)C(=O)C1=O)c4ccccc4	IC50	>	50000	-1	MAP kinase ERK2	Sub-train	1	0.327788	0.672212	In
Cpd2070	CHEMBL606245	Cc1c(Nc2c(\C=C\CCN3CCC[C@@H](N)C3)cncc2C#N)ccc4[nH]ccc14	IC50	>	50000	-1	MAP kinase ERK2	Sub-train	1	0.141739	0.858261	In
Cpd2074	CHEMBL485259	CC12CCC(CC1)C(C)(C)O2	IC50	=	Not Active	-1	MAP kinase ERK2	Sub-train	-1	0.998587	0.00141264	In
Cpd2075	CHEMBL809	CN[C@H]1CC[C@@H](c2ccc(Cl)c(Cl)c2)c3ccccc13	IC50	=	Not Active	-1	MAP kinase ERK2	Sub-train	-1	0.978381	0.0216191	In
Cpd2076	CHEMBL631	CCCNCC(O)COc1ccccc1C(=O)CCc2ccccc2	IC50	=	Not Active	-1	MAP kinase ERK2	Sub-train	-1	0.788066	0.211934	In
Cpd2077	CHEMBL1385840	CC(C)[C@@H]1N2C(=O)[C@](NC(=O)[C@H]3CN(C)[C@@H]4Cc5c[nH]c6cccc(C4=C3)c56)(O[C@@]2(O)[C@@H]7CCCN7C1=O)C(C)C	IC50	=	Not Active	-1	MAP kinase ERK2	Sub-train	-1	0.978819	0.0211814	In
Cpd2078	CHEMBL628	CN1C(=O)N(CCCCC(=O)C)C(=O)c2c1ncn2C	IC50	=	Not Active	-1	MAP kinase ERK2	Sub-train	-1	0.99599	0.00400982	In
Cpd2081	CHEMBL3215298	CC[C@H](C)[C@H]1O[C@@]2(C[C@@H]3C[C@@H](C\C=C(/C)\[C@@H](O[C@H]4C[C@H](OC)[C@@H](O[C@H]5C[C@H](OC)[C@@H](O)[C@H](C)O5)[C@H](C)O4)[C@@H](C)\C=C\C=C\6/CO[C@@H]7[C@H](O)C(=C[C@@H](C(=O)O3)[C@]67O)C)O2)C=C[C@@H]1C.CO[C@H]8C[C@H](O[C@H]9[C@H](C)O[C@H](C[C@@H]9OC)O[C@H]%10[C@@H](C)\C=C\C=C\%11/CO[C@@H]%12[C@H](O)C(=C[C@@H](C(=O)O[C@H]%13C[C@@H](C\C=C\%10/C)O[C@@]%14(C%13)O[C@H](C(C)C)[C@@H](C)C=C%14)[C…	IC50	=	Not Active	-1	MAP kinase ERK2	Sub-train	-1	0.913008	0.0869922	In
Cpd2082	CHEMBL566534	CO[C@H]1O[C@@H]2O[C@@]3(C)CC[C@H]4[C@H](C)CC[C@@H]([C@H]1C)[C@@]24OO3	IC50	=	Not Active	-1	MAP kinase ERK2	Test	-1	0.998808	0.00119234	In
Cpd2083	CHEMBL608	CC(C)(C)c1cc(SC(C)(C)Sc2cc(c(O)c(c2)C(C)(C)C)C(C)(C)C)cc(c1O)C(C)(C)C	IC50	=	Not Active	-1	MAP kinase ERK2	Test	-1	0.999197	0.000802515	In
Cpd2087	CHEMBL567	OCCN1CCN(CCCN2c3ccccc3Sc4ccc(Cl)cc24)CC1	IC50	=	Not Active	-1	MAP kinase ERK2	Sub-train	-1	0.997165	0.00283504	In
Cpd2088	CHEMBL472	COc1ccc(Cl)cc1C(=O)NCCc2ccc(cc2)S(=O)(=O)NC(=O)NC3CCCCC3	IC50	=	Not Active	-1	MAP kinase ERK2	Sub-train	-1	0.828759	0.171241	In
Cpd2089	CHEMBL578	CCOC(=O)[C@H](CCc1ccccc1)N[C@@H](C)C(=O)N2CCC[C@H]2C(=O)O	IC50	=	Not Active	-1	MAP kinase ERK2	Sub-train	-1	0.950843	0.0491573	In
Cpd2090	CHEMBL1167	CN[C@@H]1[C@H](O)[C@H](NC)[C@H]2O[C@]3(O)[C@@H](O[C@H](C)CC3=O)O[C@@H]2[C@H]1O	IC50	=	Not Active	-1	MAP kinase ERK2	Test	-1	0.998047	0.00195275	In
Cpd2091	CHEMBL1201237	CC(C)(C)NC[C@H](O)COc1cccc2C(=O)CCCc12	IC50	=	Not Active	-1	MAP kinase ERK2	Sub-train	-1	0.966149	0.0338513	In
Cpd2092	CHEMBL2252949	CC1(C)[C@H]2CC[C@]1(C)C(=O)C2	IC50	=	Not Active	-1	MAP kinase ERK2	Sub-train	-1	0.997943	0.00205731	In
Cpd2093	CHEMBL3928896	Nc1ncc(nc1c2ccc(C(=O)N[C@H](CO)c3cc(F)cc(Br)c3)c(F)c2)C4CCC(O)C(F)C4	IC50	=	0.0469	1	MAP kinase ERK2	Test	1	0.012114	0.987886	In
Cpd2096	CHEMBL3960363	CN(Cc1ccccc1)C(=O)c2ccc(cc2F)c3nc(cnc3N)C4CCOCC4	IC50	=	31.2	1	MAP kinase ERK2	Test	1	0.130204	0.869796	In
Cpd2099	CHEMBL3917319	Nc1ncc(nc1c2ccc(C(=O)N[C@@H]3CCCN(C3)S(=O)(=O)c4ccccc4)c(F)c2)C5CCOCC5	IC50	=	45.9	1	MAP kinase ERK2	Sub-train	-1	0.670991	0.329009	In
Cpd2101	CHEMBL4112127	Cc1cnccc1c2cnc(N)c(n2)c3ccc(C(=O)N[C@H](CO)c4ccccc4)c(F)c3	IC50	=	0.364	1	MAP kinase ERK2	Sub-train	1	0.0165658	0.983434	In
Cpd2117	CHEMBL3654856	C[C@@H](NC(=O)Nc1cc2[nH]nc(c3ccnc(C)c3)c2cn1)c4cc(Cl)ccn4	IC50	=	1.056	1	MAP kinase ERK2	Sub-train	1	0.0123175	0.987682	In
Cpd2118	CHEMBL4109176	Nc1ncc(cc1c2ccc(C(=O)N[C@H](CO)c3ccccc3)c(F)c2)c4conc4	IC50	=	1.4	1	MAP kinase ERK2	Sub-train	1	0.0227195	0.977281	In
Cpd2119	CHEMBL4108262	Cc1c(cnn1C)c2cnc(N)c(c2)c3ccc(C(=O)N[C@H](CO)c4ccccc4)c(F)c3	IC50	=	1.58	1	MAP kinase ERK2	Sub-train	1	0.0491659	0.950834	In
Cpd2120	CHEMBL3932226	Nc1ncc(nc1c2ccc(C(=O)N[C@H](CO)c3cc(F)cc(Br)c3)c(F)c2)C4CCC(O)CC4	IC50	=	0.0394	1	MAP kinase ERK2	Sub-train	1	0.0175017	0.982498	In
Cpd2125	CHEMBL3680617	OP(=O)(O)OC[C@@H](N1C=CC(=CC1=O)c2ccnc(NC3CCOCC3)n2)c4ccc(Cl)c(F)c4	IC50	=	249.1	1	MAP kinase ERK2	Sub-train	1	0.00968269	0.990317	Outlier
Cpd2128	CHEMBL4109328	Cn1nccc1c2cnc(N)c(c2)c3ccc(C(=O)N[C@H](CO)c4cccc(CF)c4)c(F)c3	IC50	=	0.0599	1	MAP kinase ERK2	Sub-train	1	0.0467931	0.953207	In
Cpd2130	CHEMBL3654860	C[C@@H](NC(=O)Nc1cc2[nH]nc(c3ccnc(C)c3)c2cn1)c4ccc(cc4)C#N	IC50	=	0.8612	1	MAP kinase ERK2	Sub-train	1	0.0350041	0.964996	In
Cpd2140	CHEMBL762	Cc1cc(c(O)c(C)c1CC2=NCCN2)C(C)(C)C	IC50	=	Not Active	-1	MAP kinase ERK2	Test	-1	0.979248	0.0207519	In
Cpd2142	CHEMBL2338334	CN1C[C@@H](Cc2ccccn2)C(=O)\C(=C\c3ccccn3)\C1	IC50	>	100000	-1	MAP kinase ERK2	Test	-1	0.782245	0.217755	In
Cpd2143	CHEMBL4114348	Cn1cncc1c2cnc(N)c(c2)c3ccc(C(=O)N[C@H](CO)c4ccccc4)c(F)c3	IC50	=	1.41	1	MAP kinase ERK2	Sub-train	1	0.0367081	0.963292	In
Cpd2146	CHEMBL3356116	Oc1ccc(NC(=O)C2CCN(CC(=O)N3CCN(CC3)c4cccc(Cl)c4)C2)cc1	IC50	=	12200	-1	MAP kinase ERK2	Sub-train	-1	0.816038	0.183962	In
Cpd2147	CHEMBL3318034	Cn1cc(cn1)c2cnc3c(NC(=O)NCc4ccccc4)ccnc3c2	IC50	>	100000	-1	MAP kinase ERK2	Sub-train	1	0.0514131	0.948587	In
Cpd2150	CHEMBL2312654	CN(C)C1CCC(CC1)Nc2nc(Nc3cc(Cl)cc(Cl)c3)ncc2c4onc(C)c4	IC50	=	30000	-1	MAP kinase ERK2	Sub-train	-1	0.823285	0.176715	In
Cpd2151	CHEMBL1221	Clc1ccc(CSC(Cn2ccnc2)c3ccc(Cl)cc3Cl)cc1	IC50	=	Not Active	-1	MAP kinase ERK2	Sub-train	-1	0.956039	0.0439611	In
Cpd2152	CHEMBL1933552	C[C@@H]1CCC(CN1)N2CC[C@@]3(C2)CN(C(=O)c4cc5ccc(F)cc5[nH]4)c6ccccc36	IC50	>	30000	-1	MAP kinase ERK2	Sub-train	-1	0.879679	0.120321	In
Cpd2153	CHEMBL1258913	O=C(N[C@H](CN1CCCC1)c2ccccc2)c3cc4[nH]nc(NC(=O)c5ccc(cc5)N6CCOCC6)c4s3	IC50	>	10000	-1	MAP kinase ERK2	Sub-train	1	0.246246	0.753754	In
Cpd2154	CHEMBL650	C[C@H]1C[C@H]2[C@@H]3CC[C@](O)(C(=O)CO)[C@@]3(C)C[C@H](O)[C@@H]2[C@@]4(C)C=CC(=O)C=C14	IC50	=	Not Active	-1	MAP kinase ERK2	Sub-train	-1	0.992422	0.0075778	In
Cpd2159	CHEMBL3891569	Nc1n[nH]c2cc(NC(=O)NC3COc4ccccc4C3)ncc12	IC50	=	37.1	1	MAP kinase ERK2	Sub-train	1	0.0240089	0.975991	In
Cpd2160	CHEMBL3966374	Nc1n[nH]c2cc(NC(=O)NC3COc4ccccc34)ncc12	IC50	=	325	1	MAP kinase ERK2	Sub-train	1	0.0357409	0.964259	In
Cpd2165	CHEMBL1046	NCCCCCC(=O)O	IC50	=	Not Active	-1	MAP kinase ERK2	Test	-1	0.995168	0.00483226	In
Cpd2166	CHEMBL3314140	Clc1ccc(cc1)c2oc(cc2)c3nccn3c4ccc(cc4)N5CCNCC5	IC50	>	30000	-1	MAP kinase ERK2	Sub-train	1	0.47544	0.52456	In
Cpd2167	CHEMBL1090360	O=C(Cc1ccccc1)Nc2cccc(c2)c3nc4sccn4c3c5ccnc(Nc6cccc(c6)N7CCOCC7)n5	IC50	>	1000	-1	MAP kinase ERK2	Test	1	0.172649	0.827351	In
Cpd2168	CHEMBL3309998	Nc1nc2c3ccc(NCCO)cc3nc(Cc4ccc5OCOc5c4)n2n1	IC50	>	10000	-1	MAP kinase ERK2	Sub-train	-1	0.512313	0.487687	In
Cpd2175	CHEMBL212382	CC(C)(C)c1nnc2ccc(cn12)c3ocnc3c4ccc(F)cc4F	IC50	>	10000	-1	MAP kinase ERK2	Sub-train	-1	0.583412	0.416588	In
Cpd2176	CHEMBL214198	CC(C)c1nnc2ccc(cn12)c3c[nH]nc3c4cc(F)ccc4F	IC50	>	10000	-1	MAP kinase ERK2	Sub-train	-1	0.753884	0.246116	In
Cpd2190	CHEMBL4113738	C[C@@H](NC(=O)Nc1cc2[nH]nc(N3CCC(CC3)C#N)c2cn1)c4ccccc4	IC50	=	9.7	1	MAP kinase ERK2	Sub-train	1	0.159971	0.840029	In
Cpd2191	CHEMBL4108144	C[C@@H](NC(=O)Nc1cc2[nH]nc(N(C)C(=O)C)c2cn1)c3ccccc3	IC50	=	484	1	MAP kinase ERK2	Test	1	0.0988896	0.90111	In
Cpd2192	CHEMBL4110149	COc1n[nH]c2cc(NC(=O)N[C@H](C)c3ccccc3)nc(NC(=O)C)c12	IC50	=	6.8	1	MAP kinase ERK2	Sub-train	1	0.139438	0.860562	In
Cpd2193	CHEMBL3956320	COc1n[nH]c2cc(NC(=O)N[C@@H](c3ccc(F)cc3)C(C)(C)O)nc(CO)c12	IC50	=	1.8	1	MAP kinase ERK2	Sub-train	1	0.0826663	0.917334	In
Cpd2194	CHEMBL3967760	COc1n[nH]c2cc(NC(=O)NCc3c(C)cccc3Cl)ncc12	IC50	=	470.4	1	MAP kinase ERK2	Sub-train	1	0.0613412	0.938659	In
Cpd2195	CHEMBL3938182	COc1n[nH]c2cc(NC(=O)NCc3ccccc3OC(F)F)ncc12	IC50	=	65.9	1	MAP kinase ERK2	Sub-train	1	0.0364037	0.963596	In
Cpd2196	CHEMBL4113805	COc1n[nH]c2cc(NC(=O)N[C@H](C)c3ccc(Cl)c(Cl)c3)ncc12	IC50	=	20.3	1	MAP kinase ERK2	Sub-train	1	0.045407	0.954593	In
Cpd2197	CHEMBL3904845	CCOCCOc1n[nH]c2cc(NC(=O)N[C@@H](c3ccccc3)C4(O)CC4)ncc12	IC50	=	4.3	1	MAP kinase ERK2	Sub-train	1	0.0245852	0.975415	In
Cpd2198	CHEMBL4107769	CCOc1n[nH]c2cc(NC(=O)N[C@@H](c3ccccc3)C4(O)CCC4)nc(CO)c12	IC50	=	0.7	1	MAP kinase ERK2	Sub-train	1	0.046907	0.953093	In
Cpd2199	CHEMBL4106871	C[C@@H](NC(=O)Nc1cc2[nH]nc(OC3CCOCC3)c2cn1)c4ccccc4	IC50	=	2.4	1	MAP kinase ERK2	Test	1	0.0452197	0.95478	In
Cpd2200	CHEMBL4110078	COC[C@@H](NC(=O)Nc1cc2[nH]nc(N3CC4CC3CO4)c2cn1)c5ccccc5	IC50	=	3	1	MAP kinase ERK2	Test	1	0.0548988	0.945101	In
Cpd2201	CHEMBL3947047	COC(=O)Nc1n[nH]c2cc(NC(=O)NC3CNc4ccccc4C3)ncc12	IC50	=	5.8	1	MAP kinase ERK2	Sub-train	1	0.0215165	0.978484	In
Cpd2202	CHEMBL4107477	CCCN1C[C@H](NC(=O)Nc2cc3[nH]nc(OCC(F)F)c3cn2)[C@H](C1)c4ccccc4	IC50	=	26.1	1	MAP kinase ERK2	Test	1	0.0196675	0.980332	In
Cpd2203	CHEMBL4115336	OC1(CCC1)[C@@H](NC(=O)Nc2cc3[nH]nc(OCC(F)F)c3cn2)c4ccccc4	IC50	=	2	1	MAP kinase ERK2	Sub-train	1	0.0154818	0.984518	In
Cpd2204	CHEMBL3927072	COc1n[nH]c2cc(NC(=O)N[C@@H]([C@@H]3CCCO3)c4ccccc4)ncc12	IC50	=	1036	-1	MAP kinase ERK2	Sub-train	1	0.0388894	0.961111	In
Cpd2205	CHEMBL4108519	COc1n[nH]c2cc(NC(=O)N[C@@H]3CN(C)[C@H](C(F)F)[C@H]3c4ccccc4)ncc12	IC50	=	7.6	1	MAP kinase ERK2	Sub-train	1	0.040271	0.959729	In
Cpd2206	CHEMBL4109763	C[C@@H](O)[C@@H](NC(=O)Nc1cc2[nH]nc(OCCOC(F)F)c2c(CO)n1)c3ccccc3	IC50	=	0.4	1	MAP kinase ERK2	Test	1	0.0699859	0.930014	In
Cpd2207	CHEMBL3956572	C[C@H](O)[C@@H](NC(=O)Nc1cc2[nH]nc(OCCOC(F)F)c2cn1)c3ccccc3	IC50	=	0.4	1	MAP kinase ERK2	Test	1	0.0329626	0.967037	In
Cpd2208	CHEMBL4115357	C[C@@H](NC(=O)Nc1cc2[nH]nc(OC3CCNC3)c2cn1)c4ccccc4	IC50	=	109.5	1	MAP kinase ERK2	Sub-train	1	0.0330719	0.966928	In
Cpd2209	CHEMBL3924351	C[C@@H](CO)COc1n[nH]c2cc(NC(=O)N[C@H](C)c3ccccc3)ncc12	IC50	=	3.1	1	MAP kinase ERK2	Sub-train	1	0.0562401	0.94376	In
Cpd2210	CHEMBL4109298	CCOc1n[nH]c2cc(NC(=O)N[C@H](COC(F)F)c3ccccc3)ncc12	IC50	=	1.3	1	MAP kinase ERK2	Sub-train	1	0.0185916	0.981408	In
Cpd2213	CHEMBL3967985	Nc1ncc(nc1c2ccc(C(=O)N[C@H](CO)c3cc(F)cc(I)c3)c(F)c2)[C@H]4CC[C@@H](O)C4	IC50	=	0.144	1	MAP kinase ERK2	Sub-train	1	0.0744623	0.925538	In
Cpd2214	CHEMBL3938437	Nc1ncc(nc1c2ccc(C(=O)N[C@H](CO)c3cc(F)cc(I)c3)c(F)c2)[C@H]4CC[C@H](O)C(F)(F)C4	IC50	=	0.0872	1	MAP kinase ERK2	Sub-train	1	0.03835	0.96165	In
Cpd2219	CHEMBL3318026	COc1cc(ccc1O)c2cnc3ccc(NC(=O)NC(C)(C)C)nc3c2	IC50	=	702	-1	MAP kinase ERK2	Sub-train	1	0.0747192	0.925281	In
Cpd2220	CHEMBL382822	COc1cc2ncnc(Nc3cccc(Cl)c3F)c2cc1CN4CCC[C@@H]4C(=O)N(C)C	IC50	>	10000	-1	MAP kinase ERK2	Sub-train	-1	0.697107	0.302893	In
Cpd2221	CHEMBL383760	CNC(=O)[C@H]1CCCN1Cc2cc3c(Nc4cccc(Cl)c4F)ncnc3cc2OC	IC50	>	10000	-1	MAP kinase ERK2	Test	-1	0.608547	0.391453	In
Cpd2222	CHEMBL382638	COc1cc2ncnc(Nc3ccc(F)c(Cl)c3)c2cc1CN4CCC[C@H]4C(=O)N	IC50	>	10000	-1	MAP kinase ERK2	Test	1	0.466757	0.533243	In
Cpd2223	CHEMBL3590111	Cc1cc(ccn1)c2n[nH]c3CCN(Cc23)S(=O)(=O)C=C	IC50	=	74	1	MAP kinase ERK2	Sub-train	-1	0.97982	0.0201803	In
Cpd2224	CHEMBL571040	COCCOc1cc2ncnc(Nc3cccc(Cl)c3F)c2cc1NC(=O)[C@@H]4CCCN4C(=O)C=C	IC50	>	10000	-1	MAP kinase ERK2	Sub-train	1	0.408078	0.591922	In
Cpd2225	CHEMBL3318027	Cn1cc(cn1)c2cnc3ccc(NC(=O)NC(C)(C)C)nc3c2	IC50	=	429	1	MAP kinase ERK2	Sub-train	1	0.320035	0.679965	In
Cpd2227	CHEMBL524266	Nc1nccc(n1)c2cc3C(=O)NC[C@H](CCF)c3[nH]2	IC50	=	846	-1	MAP kinase ERK2	Sub-train	-1	0.793368	0.206632	In
Cpd2228	CHEMBL1201207	C[C@H]1C[C@H]2[C@@H]3CCC4=CC(=O)C=C[C@]4(C)[C@@]3(F)[C@@H](O)C[C@]2(C)[C@@]1(O)C(=O)COP(=O)(O)O	IC50	=	Not Active	-1	MAP kinase ERK2	Sub-train	1	0.0931194	0.906881	Outlier
Cpd2229	CHEMBL267894	CCC1(CCC(C)C)C(=O)NC(=NC1=O)O	IC50	=	Not Active	-1	MAP kinase ERK2	Sub-train	-1	0.999817	0.000182941	In
Cpd2230	CHEMBL294199	COc1cc(CNC(=O)CCCC\C=C\C(C)C)ccc1O	IC50	=	Not Active	-1	MAP kinase ERK2	Test	-1	0.872435	0.127565	In
Cpd2231	CHEMBL3608586	OC[C@@H](N1CCCn2cc(cc2C1=O)c3ccnc(N[C@H]4[C@@H]5COC[C@H]45)n3)c6cccc(Cl)c6	IC50	=	0.026	1	MAP kinase ERK2	Test	1	0.172693	0.827307	In
Cpd2233	CHEMBL1095626	COC(=O)N1CCC(CC1)n2ncc3c(nc(nc23)c4ccc(N)cc4)N5CCOCC5	IC50	>	50000	-1	MAP kinase ERK2	Sub-train	-1	0.745964	0.254036	In
Cpd2234	CHEMBL461139	O=C1NC=Nc2[nH]c(cc12)c3ccnc(\C=C\c4ccc(CN5CCOCC5)cc4)c3	IC50	=	1100	-1	MAP kinase ERK2	Sub-train	1	0.155796	0.844204	In
Cpd2235	CHEMBL3398597	Oc1ccc(NC(=O)[C@@H]2CCN(CC(=O)N3CCN(CC3)c4ccc(cc4)c5ocnc5)C2)cc1Cl	IC50	=	12000	-1	MAP kinase ERK2	Sub-train	-1	0.603305	0.396695	In
Cpd2238	CHEMBL599428	Cn1nc(C(=O)N)c2CCc3cnc(NC4CCN(CC4)C(=O)c5ccccc5)nc3c12	IC50	=	226	1	MAP kinase ERK2	Sub-train	1	0.474834	0.525166	In
Cpd2241	CHEMBL3780358	COc1cccc(NC(=O)Nc2cncc3nc(cnc23)c4ccccc4)c1	IC50	>	31600	-1	MAP kinase ERK2	Test	1	0.0264722	0.973528	In
Cpd2242	CHEMBL3781795	C1CCN(CC1)c2ccc(Nc3cc4nc(cnc4cn3)c5ccccc5)cc2	IC50	=	23240	-1	MAP kinase ERK2	Sub-train	1	0.211639	0.788361	In
Cpd2243	CHEMBL3787112	Nc1ncnc2c1c(cn2[C@@H]3C[C@H](CN4CCC4)C3)c5cccc(O)c5	IC50	>	10000	-1	MAP kinase ERK2	Sub-train	-1	0.906359	0.0936413	In
Cpd2244	CHEMBL3964039	CCn1ncc2cc3NC(=O)N[C@H](COCCCc(n3)c12)c4ccccc4	IC50	=	8.791	1	MAP kinase ERK2	Test	1	0.230825	0.769175	In
Cpd2245	CHEMBL3925782	CCn1ncc2cc3NC(=O)N[C@H](COC[C@@H](O)Cc(n3)c12)c4ccc(Cl)c(F)c4	IC50	=	5.088	1	MAP kinase ERK2	Sub-train	1	0.150971	0.849029	In
Cpd2246	CHEMBL1644619	O=C1NN=C(N1c2ccc3ccccc3c2)c4ccnc(NC5CCCOC5)c4	IC50	=	22000	-1	MAP kinase ERK2	Sub-train	1	0.0393087	0.960691	In
Cpd2247	CHEMBL1644643	O=C1N(N=C(N1c2ccc3ccccc3c2)c4ccnc(NC5CCOCC5)c4)C6CCNCC6	IC50	>	5000	-1	MAP kinase ERK2	Sub-train	1	0.196642	0.803358	In
Cpd2248	CHEMBL3781610	COc1cccc(Nc2cncc3ncc(nc23)c4ccc(cc4)N5CCCCC5)c1	IC50	=	16630	-1	MAP kinase ERK2	Sub-train	1	0.405408	0.594592	In
Cpd2249	CHEMBL1684800	COc1ccc(Cn2ncc(NC(=O)c3cc(NC(=O)Nc4ccc(Cl)c(c4)C(F)(F)F)ccc3C)c2N)cc1	IC50	=	11380	-1	MAP kinase ERK2	Sub-train	1	0.0104183	0.989582	In
Cpd2253	CHEMBL1288069	COc1ccc(CC(=O)Nc2ccsc2c3c[nH]c(C)n3)cc1	IC50	>	50000	-1	MAP kinase ERK2	Sub-train	-1	0.984333	0.0156669	In
Cpd2254	CHEMBL1288895	COC(=O)c1sccc1NC(=O)Cc2cccs2	IC50	>	50000	-1	MAP kinase ERK2	Sub-train	-1	0.993807	0.00619339	In
Cpd2255	CHEMBL1651523	COc1cc(O)c2C(=O)O[C@@H](C)C\C=C/C(=O)CCCCCc2c1	IC50	>	10000	-1	MAP kinase ERK2	Sub-train	-1	0.949411	0.0505886	In
Cpd2257	CHEMBL119443	C[C@@H](CO)NC(=O)[C@H]1CN(C)[C@@H]2Cc3c[nH]c4cccc(C2=C1)c34	IC50	=	Not Active	-1	MAP kinase ERK2	Sub-train	-1	0.979956	0.0200444	In
Cpd2258	CHEMBL926	CC(CCc1ccc(O)cc1)NCCc2ccc(O)c(O)c2	IC50	=	Not Active	-1	MAP kinase ERK2	Sub-train	-1	0.883708	0.116292	In
Cpd2259	CHEMBL1650	CC(=O)OCC(=O)[C@@]1(O)CC[C@H]2[C@@H]3CCC4=CC(=O)CC[C@]4(C)[C@H]3C(=O)C[C@]12C	IC50	=	Not Active	-1	MAP kinase ERK2	Test	-1	0.972291	0.0277086	In
Cpd2260	CHEMBL1644638	O=C1N(CC2CCOCC2)N=C(N1c3ccc4ccccc4c3)c5ccnc(NC6CCCCC6)c5	IC50	>	50000	-1	MAP kinase ERK2	Sub-train	1	0.120651	0.879349	In
Cpd2261	CHEMBL1922114	CC[C@@H](Nc1nc(NCc2ccccn2)c3ncn(C(C)C)c3n1)C(C)O	IC50	=	73000	-1	MAP kinase ERK2	Sub-train	-1	0.821811	0.178189	In
Cpd2262	CHEMBL698	CCCCNc1ccc(cc1)C(=O)OCCN(C)C	IC50	=	Not Active	-1	MAP kinase ERK2	Sub-train	-1	0.818105	0.181895	In
Cpd2263	CHEMBL1922123	CC[C@@H](Nc1nc(NCc2cccnc2)c3ncn(C(C)C)c3n1)C(C)(C)O	IC50	=	91000	-1	MAP kinase ERK2	Sub-train	-1	0.83731	0.16269	In
Cpd2264	CHEMBL56564	CN1[C@@H]2CC[C@H]1C[C@H](C2)OC(=O)c3c[nH]c4ccccc34	IC50	=	Not Active	-1	MAP kinase ERK2	Sub-train	-1	0.8808	0.1192	In
Cpd2267	CHEMBL1231107	Nc1nc(N)nc(NC2CC2)n1	IC50	=	Not Active	-1	MAP kinase ERK2	Sub-train	-1	0.989518	0.0104818	In
Cpd2268	CHEMBL466496	C[C@@H](NC1=C(Nc2ccncc2)C(=O)C1=O)c3ccccc3	IC50	=	4600	-1	MAP kinase ERK2	Sub-train	-1	0.608334	0.391666	In
Cpd2269	CHEMBL998	CCOC(=O)N1CCC(=C2c3ccc(Cl)cc3CCc4cccnc24)CC1	IC50	=	Not Active	-1	MAP kinase ERK2	Sub-train	1	0.336348	0.663652	In
Cpd2270	CHEMBL480	Cc1c(OCC(F)(F)F)ccnc1C[S+]([O-])c2nc3ccccc3[nH]2	IC50	=	Not Active	-1	MAP kinase ERK2	Sub-train	-1	0.515966	0.484034	In
Cpd2271	CHEMBL2420911	C1CNCC2(C1)CCN(CC2)c3ncnc4[nH]cnc34	IC50	=	38000	-1	MAP kinase ERK2	Sub-train	-1	0.920425	0.0795746	In
Cpd2276	CHEMBL2381601	N[C@@H]1CC[C@H](CC1)Nc2ncc(C(=O)N)n3cc(nc23)c4ccc(Cl)cc4	IC50	>	30000	-1	MAP kinase ERK2	Sub-train	1	0.25987	0.74013	In
Cpd2277	CHEMBL3589654	CC(C)(C)c1ccc2[nH]c3c4ccccc4nc(C(=O)O)c3c2c1	IC50	>	10000	-1	MAP kinase ERK2	Sub-train	-1	0.544369	0.455631	In
Cpd2285	CHEMBL3318033	Cn1cc(cn1)c2cnc3c(NC(=O)Nc4ccccc4)ccnc3c2	IC50	>	100000	-1	MAP kinase ERK2	Sub-train	1	0.0774496	0.92255	In
Cpd2286	CHEMBL502896	Cl.NC[C@@H]1CC[C@H](CC1)C(=O)Oc2ccc(CCC(=O)O)cc2	IC50	=	Not Active	-1	MAP kinase ERK2	Sub-train	-1	0.822672	0.177328	In
Cpd2287	CHEMBL178	COc1cccc2C(=O)c3c(O)c4C[C@](O)(C[C@H](O[C@H]5C[C@H](N)[C@H](O)[C@H](C)O5)c4c(O)c3C(=O)c12)C(=O)C	IC50	=	Not Active	-1	MAP kinase ERK2	Sub-train	-1	0.875415	0.124585	In
Cpd2289	CHEMBL871	CC(O)(P(=O)(O)O)P(=O)(O)O	IC50	=	Not Active	-1	MAP kinase ERK2	Sub-train	-1	0.963584	0.0364159	Outlier
Cpd2290	CHEMBL504	C[S+](C)[O-]	IC50	=	Not Active	-1	MAP kinase ERK2	Test	-1	0.99995	4.97756e-05	In
Cpd2296	CHEMBL34139	C[C@H]([C@](O)(Cn1cncn1)c2ccc(F)cc2F)S(=O)(=O)C	IC50	=	Not Active	-1	MAP kinase ERK2	Sub-train	-1	0.997965	0.00203481	In
Cpd2297	CHEMBL44814	ClC(Cl)(Cl)Cl	IC50	=	Not Active	-1	MAP kinase ERK2	Sub-train	-1	1	6.58272e-08	Outlier
Cpd2298	CHEMBL455641	CC[C@H](CO)Nc1nc(NCc2ccncc2)c3ncn(C(C)C)c3n1	IC50	=	32000	-1	MAP kinase ERK2	Sub-train	-1	0.850142	0.149858	In
Cpd2299	CHEMBL1922203	CC[C@@H](Nc1nc(NCc2ccccc2)c3ncn(C(C)C)c3n1)C(C)(C)O	IC50	=	149000	-1	MAP kinase ERK2	Sub-train	-1	0.790029	0.209971	In
Cpd2300	CHEMBL395157	COc1ccc2[nH]c3C(NCCc3c2c1)C(=O)O	IC50	>	100000	-1	MAP kinase ERK2	Sub-train	-1	0.974242	0.025758	In
Cpd2301	CHEMBL643	CC(CN1c2ccccc2Sc3ccccc13)N(C)C	IC50	=	Not Active	-1	MAP kinase ERK2	Sub-train	-1	0.996794	0.00320562	In
Cpd2302	CHEMBL130	OC[C@@H](NC(=O)C(Cl)Cl)[C@H](O)c1ccc(cc1)[N+](=O)[O-]	IC50	=	Not Active	-1	MAP kinase ERK2	Sub-train	-1	0.879376	0.120624	In
Cpd2303	CHEMBL511410	NC(=O)C(NC1=C(Nc2ccncc2)C(=O)C1=O)c3cccc(O)c3	IC50	=	4200	-1	MAP kinase ERK2	Sub-train	-1	0.505917	0.494083	In
Cpd2304	CHEMBL468125	C[C@@H](NC1=C(Nc2ccnc(c2)c3ccccc3F)C(=O)C1=O)c4ccccc4	IC50	>	50000	-1	MAP kinase ERK2	Sub-train	1	0.148902	0.851098	In
Cpd2305	CHEMBL1922115	CCC(O)[C@@H](CC)Nc1nc(NCc2ccccn2)c3ncn(C(C)C)c3n1	IC50	=	230000	-1	MAP kinase ERK2	Sub-train	-1	0.812944	0.187056	In
Cpd2306	CHEMBL247250	CNC(=O)Nc1ccc(CNc2ncsc2C(=O)Nc3ccc4OC(F)(F)Oc4c3)cn1	IC50	=	508	-1	MAP kinase ERK2	Test	-1	0.546592	0.453408	In
Cpd2307	CHEMBL1163016	CC1(C)CC(CC(C)(C)N1[O])N=C(O)c2cccc(c2)c3cc4nccc(Nc5cccc(O)c5)n4n3	IC50	>	50000	-1	MAP kinase ERK2	Sub-train	1	0.0875131	0.912487	In
Cpd2308	CHEMBL3628365	c1cc2nc(cnc2[nH]1)c3ccc4cn[nH]c4c3	IC50	=	31900	-1	MAP kinase ERK2	Test	-1	0.766264	0.233736	In
Cpd2309	CHEMBL3628366	c1cncc(c1)c2cnc3[nH]cc(c4cccnc4)c3n2	IC50	=	407	1	MAP kinase ERK2	Sub-train	-1	0.814287	0.185713	In
Cpd2310	CHEMBL1208572	CC[C@H]([C@H]1CC[C@H](C)[C@@H](O1)[C@@H](C)[C@H](O)[C@H](C)C(=O)[C@H](CC)[C@H]2O[C@@]3(O[C@@]4(CC[C@](C)(O4)[C@H]5CC[C@](O)(CC)[C@H](C)O5)[C@H](O)C=C3)[C@H](C)C[C@@H]2C)C(=O)O	IC50	=	Not Active	-1	MAP kinase ERK2	Sub-train	-1	0.995964	0.00403623	In
Cpd2311	CHEMBL1076211	CC(CN1CCCCC1)C(=O)c2ccc(C)cc2	IC50	=	Not Active	-1	MAP kinase ERK2	Sub-train	-1	0.964267	0.0357335	In
Cpd2312	CHEMBL3628372	Cc1ccc(cn1)c2c[nH]c3ncc(nc23)c4ccncc4	IC50	=	634	-1	MAP kinase ERK2	Test	-1	0.766466	0.233534	In
Cpd2313	CHEMBL599	CN1C(=C(O)c2ccccc2S1(=O)=O)C(=O)Nc3ncc(C)s3	IC50	=	Not Active	-1	MAP kinase ERK2	Test	-1	0.974585	0.0254149	In
Cpd2314	CHEMBL427526	CC(C)Cc1ccc(cc1)[C@@H](C)C(=O)O	IC50	=	Not Active	-1	MAP kinase ERK2	Sub-train	-1	0.92524	0.0747599	In
Cpd2315	CHEMBL27577	NC(=O)c1ccccc1O	IC50	=	Not Active	-1	MAP kinase ERK2	Sub-train	-1	0.966412	0.0335882	In
Cpd2316	CHEMBL960	Cc1oncc1C(=O)Nc2ccc(cc2)C(F)(F)F	IC50	=	Not Active	-1	MAP kinase ERK2	Test	1	0.458195	0.541805	In
Cpd2317	CHEMBL2107687	[Br-].CCC(C)C(C(=O)OCC[N+](C)(CC)CC)c1ccccc1	IC50	=	Not Active	-1	MAP kinase ERK2	Sub-train	-1	0.991239	0.00876066	In
Cpd2325	CHEMBL453	Cc1noc(NS(=O)(=O)c2ccc(N)cc2)c1C	IC50	=	Not Active	-1	MAP kinase ERK2	Sub-train	-1	0.968519	0.0314806	In
Cpd2326	CHEMBL122	CS(=O)(=O)c1ccc(cc1)C2=C(C(=O)OC2)c3ccccc3	IC50	=	Not Active	-1	MAP kinase ERK2	Sub-train	1	0.234979	0.765021	In
Cpd2327	CHEMBL43882	ClCC(Cl)Cl	IC50	=	Not Active	-1	MAP kinase ERK2	Sub-train	-1	0.999818	0.000181779	In
Cpd2328	CHEMBL1395	C[C@]1(O)CC[C@H]2[C@@H]3CCC4=CC(=O)CC[C@]4(C)[C@H]3CC[C@]12C	IC50	=	Not Active	-1	MAP kinase ERK2	Sub-train	-1	0.984582	0.0154182	In
Cpd2329	CHEMBL15511	CCN1CCN(CC1)c2cc3N(C=C(C(=O)O)C(=O)c3cc2F)C4CC4	IC50	=	Not Active	-1	MAP kinase ERK2	Test	-1	0.992069	0.00793093	In
Cpd2330	CHEMBL190	CN1C(=O)N(C)c2[nH]cnc2C1=O	IC50	=	Not Active	-1	MAP kinase ERK2	Sub-train	-1	0.996588	0.00341201	In
Cpd2332	CHEMBL376180	Nc1nc(N)c2nc(CNc3ccc(cc3)C(=O)N[C@@H](CCC(=O)O)C(=O)O)cnc2n1	IC50	=	Not Active	-1	MAP kinase ERK2	Sub-train	-1	0.503273	0.496727	In
Cpd2333	CHEMBL1201353	CN(C)CC[C@@H](c1ccc(Cl)cc1)c2ccccn2	IC50	=	Not Active	-1	MAP kinase ERK2	Sub-train	-1	0.872715	0.127285	In
Cpd2334	CHEMBL3752694	COc1cc2nc(NC(=O)c3csc(COc4ccc(F)cc4)n3)sc2cc1OC	IC50	=	82000	-1	MAP kinase ERK2	Sub-train	-1	0.943537	0.0564633	In
Cpd2335	CHEMBL493	CC(C)C[C@@H]1N2C(=O)[C@](NC(=O)[C@H]3CN(C)[C@@H]4Cc5c(Br)[nH]c6cccc(C4=C3)c56)(O[C@@]2(O)[C@@H]7CCCN7C1=O)C(C)C	IC50	=	Not Active	-1	MAP kinase ERK2	Test	-1	0.987816	0.0121843	In
Cpd2336	CHEMBL1503	COc1ccc2[nH]c(nc2c1)[S+]([O-])Cc3ncc(C)c(OC)c3C	IC50	=	Not Active	-1	MAP kinase ERK2	Sub-train	-1	0.635979	0.364021	In
Cpd2337	CHEMBL117405	CC(C)NC[C@H](O)COc1cccc2[nH]ccc12	IC50	=	Not Active	-1	MAP kinase ERK2	Sub-train	-1	0.988876	0.0111236	In
Cpd2338	CHEMBL1200623	CC[C@]1(O)CC[C@H]2[C@@H]3CCC4=CCCC[C@@H]4[C@H]3CC[C@]12C	IC50	=	Not Active	-1	MAP kinase ERK2	Sub-train	-1	0.994168	0.00583215	In
Cpd2339	CHEMBL49	O=C1CC2(CCCC2)CC(=O)N1CCCCN3CCN(CC3)c4ncccn4	IC50	=	Not Active	-1	MAP kinase ERK2	Sub-train	-1	0.914424	0.0855761	In
Cpd2340	CHEMBL545	CCO	IC50	=	Not Active	-1	MAP kinase ERK2	Sub-train	-1	0.99988	0.000120238	Outlier
Cpd2341	CHEMBL808	Clc1ccc(COC(Cn2ccnc2)c3ccc(Cl)cc3Cl)cc1	IC50	=	Not Active	-1	MAP kinase ERK2	Sub-train	-1	0.849528	0.150472	In
Cpd2342	CHEMBL427216	Cc1ccc(cc1)S(=O)(=O)NC(=O)NN2CC3CCCC3C2	IC50	=	Not Active	-1	MAP kinase ERK2	Sub-train	-1	0.997516	0.00248446	In
Cpd2343	CHEMBL1536	CC(C)[C@@H](C)\C=C\[C@@H](C)[C@H]1CC[C@H]2\C(=C\C=C/3\C[C@@H](O)CCC3=C)\CCC[C@]12C	IC50	=	Not Active	-1	MAP kinase ERK2	Sub-train	-1	0.979981	0.0200193	In
Cpd2344	CHEMBL666	OC(=O)P(=O)(O)O	IC50	=	Not Active	-1	MAP kinase ERK2	Sub-train	-1	0.67149	0.32851	Outlier
Cpd2345	CHEMBL558551	O=C1CC[C@@H](N2C(=O)c3ccccc3C2=O)C(=O)N1	IC50	=	Not Active	-1	MAP kinase ERK2	Sub-train	-1	0.99261	0.00738972	In
Cpd2346	CHEMBL457299	OCCO	IC50	=	Not Active	-1	MAP kinase ERK2	Test	-1	0.999731	0.000269479	Outside-AD
Cpd2347	CHEMBL3577636	COc1ccc(cc1)N2C(=O)\C(=C\c3ccc(OCC(=O)Nc4ccccc4)cc3)\N=C2c5ccccc5	IC50	=	23	1	MAP kinase ERK2	Sub-train	1	0.38028	0.61972	In
Cpd2348	CHEMBL1095627	CC(C)(C)OC(=O)N1CCC(CC1)n2ncc3c(nc(nc23)c4ccc(N)cc4)N5CCOCC5	IC50	>	50000	-1	MAP kinase ERK2	Sub-train	-1	0.645676	0.354324	In
Cpd2349	CHEMBL3426225	CCn1nc(C#Cc2cc(ccc2C)C(=O)Nc3ccc(CN4CCN(C)CC4)c(c3)C(F)(F)F)c5c(N)ncnc15	IC50	>	10000	-1	MAP kinase ERK2	Sub-train	1	0.0543753	0.945625	In
Cpd2350	CHEMBL20883	FC1=CN(C2CCCO2)C(=O)NC1=O	IC50	=	Not Active	-1	MAP kinase ERK2	Sub-train	-1	0.996511	0.00348905	In
Cpd2351	CHEMBL1614641	C[C@H](C(=O)O)c1ccc2oc(nc2c1)c3ccc(F)cc3	IC50	=	Not Active	-1	MAP kinase ERK2	Sub-train	-1	0.835278	0.164722	In
Cpd2352	CHEMBL1080995	CN1CCN(CC1)S(=O)(=O)c2cccc(\C=C\c3c(C)ncc(C#N)c3Nc4ccc5[nH]ccc5c4C)c2	IC50	>	50000	-1	MAP kinase ERK2	Sub-train	-1	0.696897	0.303103	In
Cpd2353	CHEMBL621	Clc1cccc(c1)N2CCN(CCCN3N=C4C=CC=CN4C3=O)CC2	IC50	=	Not Active	-1	MAP kinase ERK2	Sub-train	1	0.355704	0.644296	In
Cpd2354	CHEMBL27769	C[C@]12CC[C@H]3[C@@H](CC[C@H]4CC(=O)CC[C@]34C)[C@@H]1CC[C@@H]2O	IC50	=	Not Active	-1	MAP kinase ERK2	Sub-train	-1	0.994044	0.0059563	In
Cpd2355	CHEMBL421	OC(=O)c1cc(ccc1O)\N=N\c2ccc(cc2)S(=O)(=O)Nc3ccccn3	IC50	=	6332	-1	MAP kinase ERK2	Test	1	0.412668	0.587332	In
Cpd2356	CHEMBL1922207	CC[C@H](Nc1nc(NCc2ccccn2)c3ncn(C(C)C)c3n1)C(O)C(C)(C)C	IC50	=	137000	-1	MAP kinase ERK2	Sub-train	-1	0.875684	0.124316	In
Cpd2357	CHEMBL1921805	CC[C@H](Nc1nc(NCc2ccccn2)c3ncn(C(C)C)c3n1)C(C)(C)O	IC50	>	200000	-1	MAP kinase ERK2	Sub-train	-1	0.835674	0.164326	In
Cpd2358	CHEMBL559147	C[C@@H](N)[C@@H]1CC[C@H](CC1)C(=O)Nc2ccncc2	IC50	=	Not Active	-1	MAP kinase ERK2	Sub-train	-1	0.62748	0.37252	In
Cpd2359	CHEMBL14053	OC(=O)C(Cl)(Cl)Cl	IC50	=	Not Active	-1	MAP kinase ERK2	Sub-train	-1	0.999893	0.000106993	In
Cpd2360	CHEMBL295416	Cc1cccc(Nc2cc(Cl)nc(SCC(=O)O)n2)c1C	IC50	=	Not Active	-1	MAP kinase ERK2	Sub-train	-1	0.769481	0.230519	In
Cpd2362	CHEMBL84158	CCN(CC)CCNC(=O)c1cc(ccc1OC)S(=O)(=O)C	IC50	=	Not Active	-1	MAP kinase ERK2	Sub-train	-1	0.874119	0.125881	In
Cpd2363	CHEMBL2105807	N.CO[C@H]1C[C@@H](O[C@H]2C[C@@H](O[C@H]2[C@]3(C)CC[C@@H](O3)[C@]4(C)CC[C@]5(C[C@H](O)[C@@H](C)[C@H](O5)[C@@H](C)[C@@H]6O[C@](O)(CC(=O)O)[C@@H](C)[C@H](OC)[C@H]6OC)O4)[C@H]7O[C@](C)(O)[C@H](C)C[C@@H]7C)O[C@@H](C)[C@@H]1OC	IC50	=	Not Active	-1	MAP kinase ERK2	Sub-train	-1	0.995266	0.00473447	Outlier
Cpd2364	CHEMBL19299	CC(C(=O)O)c1ccc(CC2CCCC2=O)cc1	IC50	=	Not Active	-1	MAP kinase ERK2	Sub-train	-1	0.815581	0.184419	In
Cpd2365	CHEMBL191	CCCCc1nc(Cl)c(CO)n1Cc2ccc(cc2)c3ccccc3c4nnn[nH]4	IC50	=	Not Active	-1	MAP kinase ERK2	Sub-train	1	0.0441473	0.955853	In
Cpd2366	CHEMBL490	Fc1ccc(cc1)[C@@H]2CCNC[C@H]2COc3ccc4OCOc4c3	IC50	=	Not Active	-1	MAP kinase ERK2	Sub-train	-1	0.890427	0.109573	In
Cpd2367	CHEMBL1679	NC1=NC(=O)C2=C(NCC(CNc3ccc(cc3)C(=O)N[C@@H](CCC(=O)O)C(=O)O)N2C=O)N1	IC50	=	Not Active	-1	MAP kinase ERK2	Test	-1	0.9904	0.00960016	In
Cpd2368	CHEMBL3628253	COc1ccc(cc1)c2cnc3[nH]ccc3n2	IC50	=	89700	-1	MAP kinase ERK2	Sub-train	-1	0.866582	0.133418	In
Cpd2369	CHEMBL3628251	Oc1cccc(c1)c2cnc3[nH]ccc3n2	IC50	>	200000	-1	MAP kinase ERK2	Test	-1	0.906866	0.0931335	In
Cpd2370	CHEMBL3628257	Fc1cc(ccn1)c2cnc3[nH]ccc3n2	IC50	=	21600	-1	MAP kinase ERK2	Test	-1	0.938871	0.061129	In
Cpd2371	CHEMBL3628360	c1cncc(c1)c2cnc3[nH]ccc3n2	IC50	=	71500	-1	MAP kinase ERK2	Sub-train	-1	0.929155	0.0708447	In
Cpd2372	CHEMBL3590124	CN(C)[C@@H]1CC[C@H](CC1)Nc2ncc(Cl)c(Nc3ccccc3NC(=O)C=C)n2	IC50	=	90	1	MAP kinase ERK2	Sub-train	-1	0.634959	0.365041	In
Cpd2374	CHEMBL3577567	COc1cccc(c1)N2C(=O)\C(=C\c3ccc(OCC(=O)Nc4ccccc4OC)cc3)\N=C2c5ccccc5	IC50	=	4.7	1	MAP kinase ERK2	Sub-train	1	0.415566	0.584434	In
Cpd2375	CHEMBL3577637	COc1ccc(cc1)N2C(=O)\C(=C\c3ccc(OCC(=O)Nc4ccccc4C)cc3)\N=C2c5ccccc5	IC50	=	23	1	MAP kinase ERK2	Sub-train	1	0.326205	0.673795	In
Cpd2376	CHEMBL3356114	CC(=O)c1ccc(cc1)N2CCN(CC2)C(=O)CN3CCC(C3)C(=O)Nc4ccc(O)cc4	IC50	=	18600	-1	MAP kinase ERK2	Sub-train	-1	0.720453	0.279547	In
Cpd2377	CHEMBL3356115	CC(=O)c1ccc(cc1)N2CCN(CC2)C(=O)CN3CCC(C3)C(=O)Nc4ccc(O)c(Cl)c4	IC50	=	4200	-1	MAP kinase ERK2	Sub-train	-1	0.637136	0.362864	In
Cpd2379	CHEMBL1741	CC[C@H]1OC(=O)[C@H](C)[C@@H](O[C@H]2C[C@@](C)(OC)[C@@H](O)[C@H](C)O2)[C@H](C)[C@@H](O[C@@H]3O[C@H](C)C[C@@H]([C@H]3O)N(C)C)[C@@](C)(C[C@@H](C)C(=O)[C@H](C)[C@@H](O)[C@]1(C)O)OC	IC50	=	Not Active	-1	MAP kinase ERK2	Sub-train	-1	0.998635	0.00136463	Outlier
Cpd2380	CHEMBL1730	CO\N=C(/C(=O)N[C@H]1[C@H]2SCC(=C(N2C1=O)C(=O)O)COC(=O)C)\c3csc(N)n3	IC50	=	Not Active	-1	MAP kinase ERK2	Sub-train	-1	0.964889	0.0351107	In
Cpd2381	CHEMBL3628382	C(Cn1cc(cn1)c2c[nH]c3ncc(nc23)c4ccncc4)c5ccccc5	IC50	=	2000	-1	MAP kinase ERK2	Sub-train	-1	0.548019	0.451981	In
Cpd2382	CHEMBL2436978	CN1CCN(Cc2ccc(cc2)c3cnc4[nH]cc(c5ccc6[nH]ccc6c5)c4c3)CC1	IC50	=	6290	-1	MAP kinase ERK2	Sub-train	1	0.330079	0.669921	In
Cpd2383	CHEMBL3909003	CCn1ncc2cc3NC(=O)N[C@H]([C@@H](O)OCCCc(n3)c12)c4ccccc4	IC50	=	24.3	1	MAP kinase ERK2	Sub-train	1	0.171887	0.828113	In
Cpd2384	CHEMBL3926893	CCn1ncc2cc3NC(=O)N[C@H](c4ccccc4)C(C)(C)OCCCc(n3)c12	IC50	=	733.9	-1	MAP kinase ERK2	Sub-train	1	0.191642	0.808358	In
Cpd2385	CHEMBL3934673	CCn1ncc2cc3NC(=O)N[C@H](COC[C@@H](O)Cc(n3)c12)c4ccc(OC)c(F)c4	IC50	=	6.284	1	MAP kinase ERK2	Sub-train	1	0.226906	0.773094	In
Cpd2386	CHEMBL3936937	CCn1ncc2cc3NC(=O)N[C@H](COCCNc(n3)c12)c4ccccc4	IC50	=	5.014	1	MAP kinase ERK2	Sub-train	1	0.257892	0.742108	In
Cpd2387	CHEMBL16068	Brc1ccccc1	IC50	=	Not Active	-1	MAP kinase ERK2	Sub-train	-1	0.99775	0.00225035	In
Cpd2388	CHEMBL1282	CC(C)Cn1cnc2c(N)nc3ccccc3c12	IC50	=	Not Active	-1	MAP kinase ERK2	Sub-train	-1	0.954219	0.0457811	In
Cpd2389	CHEMBL1454946	COC(=O)Nc1nc2cc(ccc2[nH]1)C(=O)c3ccc(F)cc3	IC50	=	Not Active	-1	MAP kinase ERK2	Sub-train	1	0.435427	0.564573	In
Cpd2390	CHEMBL157138	CCN(CC)C(=O)N[C@@H]1CN(C)[C@@H]2Cc3c[nH]c4cccc(C2=C1)c34	IC50	=	Not Active	-1	MAP kinase ERK2	Sub-train	-1	0.95896	0.0410397	In
Cpd2391	CHEMBL433257	COC(=O)C[C@](O)(CCC(C)(C)O)C(=O)O[C@H]1[C@H]2c3cc4OCOc4cc3CCN5CCC[C@]25C=C1OC	IC50	=	Not Active	-1	MAP kinase ERK2	Sub-train	-1	0.990397	0.00960278	In
Cpd2392	CHEMBL1567463	C[N+](C)(C)CCOP(=O)([O-])OC[C@H](O)CO	IC50	=	Not Active	-1	MAP kinase ERK2	Sub-train	1	0.425741	0.574259	Outlier
Cpd2393	CHEMBL1194	CCCNC(C)C(=O)Nc1ccccc1C	IC50	=	Not Active	-1	MAP kinase ERK2	Test	-1	0.963658	0.0363419	In
Cpd2394	CHEMBL1952210	COc1ccc(cc1)N2Cc3cnc(Nc4ccccc4)nc3N([C@@H]5CC[C@@H](O)C5)C2=O	IC50	=	3040	-1	MAP kinase ERK2	Sub-train	1	0.0809423	0.919058	In
Cpd2395	CHEMBL1201139	CC(=O)O[C@@]1(CC[C@H]2[C@@H]3C=C(C)C4=CC(=O)CC[C@]4(C)[C@H]3CC[C@]12C)C(=O)C	IC50	=	Not Active	-1	MAP kinase ERK2	Sub-train	-1	0.923581	0.0764189	In
Cpd2396	CHEMBL398440	Cc1cc(O)cc(C)c1Cl	IC50	=	Not Active	-1	MAP kinase ERK2	Sub-train	-1	0.997975	0.00202478	In
Cpd2397	CHEMBL88	ClCCN(CCCl)P1(=O)NCCCO1	IC50	=	Not Active	-1	MAP kinase ERK2	Sub-train	-1	0.737709	0.262291	Outlier
Cpd2398	CHEMBL316561	CCCN(CCC)C(=O)C(CCC(=O)O)NC(=O)c1ccccc1	IC50	=	Not Active	-1	MAP kinase ERK2	Sub-train	-1	0.996497	0.00350314	In
Cpd2399	CHEMBL1908355	NC(=O)N1C(=O)\C(=C(/O)\c2cccs2)\c3cc(Cl)ccc13	IC50	=	Not Active	-1	MAP kinase ERK2	Sub-train	-1	0.973422	0.026578	In
Cpd2400	CHEMBL15770	C[S+]([O-])c1ccc(\C=C/2\C(=C(CC(=O)O)c3cc(F)ccc23)C)cc1	IC50	=	Not Active	-1	MAP kinase ERK2	Sub-train	-1	0.697905	0.302095	In
Cpd2401	CHEMBL918	NC(=O)NC(=O)Cc1ccccc1	IC50	=	Not Active	-1	MAP kinase ERK2	Sub-train	-1	0.969411	0.0305892	In
Cpd2402	CHEMBL573	OC(=O)c1cccnc1	IC50	=	Not Active	-1	MAP kinase ERK2	Sub-train	-1	0.741668	0.258332	In
Cpd2403	CHEMBL1566956	COc1cc(cc(OC)c1OC)C(=O)NC2CCCNC2	IC50	=	Not Active	-1	MAP kinase ERK2	Sub-train	-1	0.961095	0.0389047	In
Cpd2405	CHEMBL1399	CC(C)(C#N)c1cc(Cn2cncn2)cc(c1)C(C)(C)C#N	IC50	=	Not Active	-1	MAP kinase ERK2	Sub-train	-1	0.97886	0.0211399	In
Cpd2406	CHEMBL1629810	CC(O)COC[C@@H]1OC[C@H]2O[C@@H]3[C@@H](O)[C@H](O)[C@@H](O[C@H]3COCC(C)O)O[C@@H]4[C@@H](O)[C@H](O)[C@@H](O[C@H]4COCC(C)O)O[C@@H]5[C@@H](O)[C@H](O)[C@@H](O[C@H]5COCC(C)O)O[C@@H]6[C@@H](O)[C@H](O)[C@@H](O[C@H]6COCC(C)O)O[C@@H]7[C@@H](O)[C@H](O)[C@@H](O[C@H]7COCC(C)O)O[C@@H]8[C@@H](O)[C@H](O)[C@@H](O[C@H]8COCC(C)O)O[C@@H]9[C@@H](O)[C@H](O)[C@@H](O[C@H]9COCC(C)O)O[C@@H]1[C@H]2O	IC50	=	Not Active	-1	MAP kinase ERK2	Sub-train	-1	0.976913	0.0230873	Outlier
Cpd2407	CHEMBL85728	Nc1ccc(Cc2ccc(N)cc2)cc1	IC50	=	Not Active	-1	MAP kinase ERK2	Sub-train	-1	0.950219	0.0497808	In
Cpd2408	CHEMBL417	COc1cccc2C(=O)c3c(O)c4C[C@](O)(C[C@H](O[C@H]5C[C@H](N)[C@@H](O)[C@H](C)O5)c4c(O)c3C(=O)c12)C(=O)CO	IC50	=	Not Active	-1	MAP kinase ERK2	Sub-train	-1	0.87324	0.12676	In
Cpd2409	CHEMBL1243	Nc1ccc(cc1)S(=O)(=O)NC(=O)c2ccccc2	IC50	=	Not Active	-1	MAP kinase ERK2	Sub-train	-1	0.922027	0.0779726	In
Cpd2410	CHEMBL1191	Cc1nnc(NS(=O)(=O)c2ccc(N)cc2)s1	IC50	=	Not Active	-1	MAP kinase ERK2	Sub-train	-1	0.990496	0.00950419	In
Cpd2411	CHEMBL95764	OC(=O)CNCP(=O)(O)O	IC50	=	Not Active	-1	MAP kinase ERK2	Sub-train	-1	0.691988	0.308012	In
Cpd2412	CHEMBL2106399	CO[C@H]1[C@H](O)CC(=O)O[C@H](C)C\C=C\C=C\[C@H](O)[C@H](C)C[C@H](CC=O)[C@@H]1O[C@@H]2O[C@H](C)[C@@H](O[C@H]3C[C@@](C)(O)[C@@H](OC(=O)CC(C)C)[C@H](C)O3)[C@@H]([C@H]2O)N(C)C	IC50	=	Not Active	-1	MAP kinase ERK2	Sub-train	-1	0.977935	0.022065	In
Cpd2413	CHEMBL109	CCCC(CCC)C(=O)O	IC50	=	Not Active	-1	MAP kinase ERK2	Sub-train	-1	0.998289	0.00171128	In
Cpd2414	CHEMBL221886	CN[C@@H]1[C@@H](O)[C@@H](O[C@H]2[C@H](N)C[C@H](N)[C@@H](O[C@H]3OC(=CC[C@H]3N)CN)[C@@H]2O)OC[C@]1(C)O	IC50	=	Not Active	-1	MAP kinase ERK2	Sub-train	-1	0.975772	0.0242278	In
Cpd2416	CHEMBL1168	CCOC(=O)[C@H](CCc1ccccc1)N[C@@H](C)C(=O)N2[C@H]3CCC[C@H]3C[C@H]2C(=O)O	IC50	=	Not Active	-1	MAP kinase ERK2	Test	-1	0.962483	0.0375172	In
Cpd2417	CHEMBL877	NC[C@@H]1CC[C@H](CC1)C(=O)O	IC50	=	Not Active	-1	MAP kinase ERK2	Sub-train	-1	0.99093	0.00907008	In
Cpd2418	CHEMBL70586	CN([C@H]1CC[C@@]2(CCCO2)C[C@@H]1N3CCCC3)C(=O)Cc4ccc(Cl)c(Cl)c4	IC50	=	Not Active	-1	MAP kinase ERK2	Sub-train	-1	0.859545	0.140455	In
Cpd2419	CHEMBL1200748	O.C[C@@](Cc1ccc(O)c(O)c1)(NN)C(=O)O	IC50	=	Not Active	-1	MAP kinase ERK2	Sub-train	1	0.291759	0.708241	In
Cpd2420	CHEMBL254219	C[C@H]1O[C@H](C[C@H](O)[C@@H]1O)O[C@H]2[C@@H](O)C[C@H](O[C@H]3[C@@H](O)C[C@H](O[C@H]4CC[C@@]5(C)[C@H](CC[C@@H]6[C@@H]5CC[C@]7(C)[C@H](CC[C@]67O)C8=CC(=O)OC8)C4)O[C@@H]3C)O[C@@H]2C	IC50	=	Not Active	-1	MAP kinase ERK2	Test	-1	0.842465	0.157535	In
Cpd2421	CHEMBL1403281	CC(C)C[C@@H]1N2C(=O)[C@](NC(=O)[C@H]3CN(C)[C@@H]4Cc5c[nH]c6cccc(C4=C3)c56)(O[C@@]2(O)[C@@H]7CCCN7C1=O)C(C)C	IC50	=	Not Active	-1	MAP kinase ERK2	Sub-train	-1	0.979918	0.0200822	In
Cpd2422	CHEMBL428880	OC(COc1cccc2OC(=CC(=O)c12)C(=O)O)COc3cccc4OC(=CC(=O)c34)C(=O)O	IC50	=	Not Active	-1	MAP kinase ERK2	Sub-train	-1	0.673794	0.326206	In
Cpd2423	CHEMBL3183075	CNC(=C[N+](=O)[O-])NCCSCc1csc(CN(C)C)n1	IC50	=	Not Active	-1	MAP kinase ERK2	Sub-train	-1	0.999754	0.000246425	In
Cpd2424	CHEMBL1539	COc1ncnc(NS(=O)(=O)c2ccc(N)cc2)c1OC	IC50	=	Not Active	-1	MAP kinase ERK2	Sub-train	-1	0.970435	0.0295648	In
Cpd2425	CHEMBL499	CC(C)(C)NC[C@H](O)COc1nsnc1N2CCOCC2	IC50	=	Not Active	-1	MAP kinase ERK2	Sub-train	-1	0.824799	0.175201	In
Cpd2426	CHEMBL81	Oc1ccc(cc1)c2sc3cc(O)ccc3c2C(=O)c4ccc(OCCN5CCCCC5)cc4	IC50	=	Not Active	-1	MAP kinase ERK2	Test	-1	0.95228	0.0477203	In
Cpd2427	CHEMBL128	CNS(=O)(=O)Cc1ccc2[nH]cc(CCN(C)C)c2c1	IC50	=	Not Active	-1	MAP kinase ERK2	Sub-train	-1	0.953996	0.0460039	In
Cpd2428	CHEMBL726	OCCN1CCN(CCCN2c3ccccc3Sc4ccc(cc24)C(F)(F)F)CC1	IC50	=	Not Active	-1	MAP kinase ERK2	Sub-train	-1	0.988427	0.0115728	In
Cpd2429	CHEMBL1651906	CN(N=O)C(=O)N[C@H]1C(O)O[C@H](CO)[C@@H](O)[C@@H]1O	IC50	=	Not Active	-1	MAP kinase ERK2	Sub-train	-1	0.872465	0.127535	In
Cpd2431	CHEMBL1762	CC(N)C(=O)Nc1c(C)cccc1C	IC50	=	Not Active	-1	MAP kinase ERK2	Sub-train	-1	0.97632	0.02368	In
Cpd2432	CHEMBL1454	C1CN2C[C@@H](N=C2S1)c3ccccc3	IC50	=	Not Active	-1	MAP kinase ERK2	Test	-1	0.992907	0.00709285	In
Cpd2433	CHEMBL267744	OC(=O)COc1ccc(C(=O)c2cccs2)c(Cl)c1Cl	IC50	=	Not Active	-1	MAP kinase ERK2	Sub-train	-1	0.993113	0.00688658	In
Cpd2434	CHEMBL3911431	CSc1nccc(n1)C(C#N)c2nc3ccccc3s2	IC50	>	30000	-1	MAP kinase ERK2	Sub-train	-1	0.903567	0.0964335	In
Cpd2435	CHEMBL1922210	CC[C@H](Nc1nc(NCc2cccnc2)c3ncn(C(C)C)c3n1)C(O)C(C)C	IC50	=	67000	-1	MAP kinase ERK2	Sub-train	-1	0.840439	0.159561	In
Cpd2436	CHEMBL799	O=C1CCc2cc(OCCCCc3nnnn3C4CCCCC4)ccc2N1	IC50	=	Not Active	-1	MAP kinase ERK2	Sub-train	1	0.297207	0.702793	In
Cpd2437	CHEMBL428	N[C@@H]1[C@H]2CN(C[C@@H]12)c3nc4N(C=C(C(=O)O)C(=O)c4cc3F)c5ccc(F)cc5F	IC50	=	Not Active	-1	MAP kinase ERK2	Sub-train	-1	0.855597	0.144403	In
Cpd2438	CHEMBL1319362	Br.CN1[C@@H]2CC[C@H]1C[C@H](C2)OC(=O)C(O)c3ccccc3	IC50	=	Not Active	-1	MAP kinase ERK2	Sub-train	-1	0.934754	0.0652463	In
Cpd2439	CHEMBL521589	CN(C)C(=O)Oc1cc(OC(=O)N(C)C)cc(c1)C(O)CNC(C)(C)C	IC50	=	Not Active	-1	MAP kinase ERK2	Sub-train	-1	0.852282	0.147718	In
Cpd2442	CHEMBL1073	Cc1cnc(cn1)C(=O)NCCc2ccc(cc2)S(=O)(=O)NC(=O)NC3CCCCC3	IC50	=	Not Active	-1	MAP kinase ERK2	Sub-train	-1	0.954993	0.0450071	In
Cpd2443	CHEMBL1670	ClC(Cl)C(c1ccc(Cl)cc1)c2ccccc2Cl	IC50	=	Not Active	-1	MAP kinase ERK2	Sub-train	-1	0.993884	0.00611558	In
Cpd2444	CHEMBL56337	C\C(=C/c1ccccc1)\C=C\2/SC(=S)N(CC(=O)O)C2=O	IC50	=	Not Active	-1	MAP kinase ERK2	Sub-train	-1	0.996809	0.00319149	In
Cpd2445	CHEMBL1572	CCN[C@@H]1C[C@H](N)[C@@H](O[C@H]2OC(=CC[C@H]2N)CN)[C@H](O)[C@H]1O[C@H]3OC[C@](C)(O)[C@H](NC)[C@H]3O	IC50	=	Not Active	-1	MAP kinase ERK2	Sub-train	-1	0.984323	0.0156772	In
Cpd2446	CHEMBL1261	OC(=O)CC(O)(CC(=O)O)C(=O)O	IC50	=	Not Active	-1	MAP kinase ERK2	Sub-train	-1	0.998536	0.00146359	In
Cpd2447	CHEMBL404520	CN(C)[C@H]1[C@@H]2C[C@H]3C(=C(O)[C@]2(O)C(=O)C(=C1O)C(=O)N)C(=O)c4c(O)ccc(Cl)c4[C@@]3(C)O	IC50	=	Not Active	-1	MAP kinase ERK2	Test	-1	0.996341	0.00365896	In
Cpd2448	CHEMBL248702	CCN[C@@H](C)Cc1cccc(c1)C(F)(F)F	IC50	=	Not Active	-1	MAP kinase ERK2	Sub-train	-1	0.962019	0.0379807	In
Cpd2449	CHEMBL1873703	ClC1=C(Cl)[C@@]2(Cl)[C@H]3[C@H]4C[C@H]([C@@H]5O[C@H]45)[C@H]3[C@]1(Cl)C2(Cl)Cl	IC50	=	Not Active	-1	MAP kinase ERK2	Sub-train	-1	0.999994	5.57185e-06	Outlier
Cpd2451	CHEMBL3606021	NC(=O)c1cc(F)cc2CN(C3CCN(CC3)C4CCC(F)(F)CC4)C(=O)c12	IC50	>	10000	-1	MAP kinase ERK2	Sub-train	-1	0.961409	0.0385908	In
Cpd2455	CHEMBL1922205	CCC(O)[C@H](CC)Nc1nc(NCc2ccccn2)c3ncn(C(C)C)c3n1	IC50	=	80000	-1	MAP kinase ERK2	Test	-1	0.812944	0.187056	In
Cpd2456	CHEMBL1922206	CC[C@H](Nc1nc(NCc2ccccn2)c3ncn(C(C)C)c3n1)C(O)C(C)C	IC50	>	200000	-1	MAP kinase ERK2	Sub-train	-1	0.838769	0.161231	In
Cpd2457	CHEMBL1922217	CC[C@H](Nc1nc(NCc2ccccc2)c3ncn(C(C)C)c3n1)C(C)(C)O	IC50	=	52000	-1	MAP kinase ERK2	Sub-train	-1	0.790029	0.209971	In
Cpd2458	CHEMBL1922201	CC[C@@H](Nc1nc(NCc2ccccc2)c3ncn(C(C)C)c3n1)C(O)C(C)C	IC50	>	200000	-1	MAP kinase ERK2	Test	-1	0.795109	0.204891	In
Cpd2459	CHEMBL1747	NC[C@H]1O[C@H](O[C@@H]2[C@@H](N)C[C@@H](N)[C@H](O[C@H]3O[C@H](CO)[C@@H](O)[C@H](N)[C@H]3O)[C@H]2O)[C@H](N)C[C@@H]1O	IC50	=	Not Active	-1	MAP kinase ERK2	Sub-train	-1	0.96595	0.0340502	In
Cpd2464	CHEMBL3663016	C[C@@H](NC(=O)Nc1cc2[nH]nc(CNCC(F)(F)F)c2cn1)c3ccccc3	IC50	=	15.01	1	MAP kinase ERK2	Sub-train	1	0.0316881	0.968312	In
Cpd2465	CHEMBL3913205	CC1CC(CC(C)O1)Oc2n[nH]c3cc(NC(=O)N[C@@H](c4ccc(F)cc4)C(C)(C)O)ncc23	IC50	=	0.9	1	MAP kinase ERK2	Sub-train	1	0.0432626	0.956737	In
Cpd2466	CHEMBL3971735	CC(C)(O)[C@@H](NC(=O)Nc1cc2[nH]nc(OC3CCOC3)c2cn1)c4ccccc4	IC50	=	0.5	1	MAP kinase ERK2	Sub-train	1	0.0403078	0.959692	In
Cpd2467	CHEMBL3954207	CCOc1n[nH]c2cc(NC(=O)N[C@@H](c3ccc(F)cc3)C(C)(C)O)ncc12	IC50	=	0.7	1	MAP kinase ERK2	Sub-train	1	0.0690038	0.930996	In
Cpd2468	CHEMBL4111814	CC(C)(O)[C@H](NC(=O)Nc1cc2[nH]nc(OC3CCOC3)c2cn1)c4ccc(F)cc4	IC50	=	1	1	MAP kinase ERK2	Sub-train	1	0.0385189	0.961481	In
Cpd2470	CHEMBL4108026	COCCOc1n[nH]c2cc(NC(=O)N[C@H](CO)c3ccccc3)ncc12	IC50	=	0.8	1	MAP kinase ERK2	Sub-train	1	0.0565861	0.943414	In
Cpd2471	CHEMBL4107371	CCOc1n[nH]c2cc(NC(=O)N[C@H](CO)c3ccccc3)ncc12	IC50	=	1.42	1	MAP kinase ERK2	Test	1	0.0477086	0.952291	In
Cpd2473	CHEMBL3663010	C[C@H]1[C@@H](NC(=O)Nc2cc3[nH]nc(c4ccnc(C)c4)c3cn2)[C@@H](CN1C)c5ccccc5C	IC50	=	0.4261	1	MAP kinase ERK2	Sub-train	1	0.00890392	0.991096	In
Cpd2474	CHEMBL4113414	C[C@@H](NC(=O)Nc1cc2[nH]nc(OCCO)c2c(C)n1)c3ccccc3	IC50	=	2.17	1	MAP kinase ERK2	Sub-train	1	0.0613184	0.938682	In
Cpd2475	CHEMBL4107533	C[C@@H](NC(=O)Nc1cc2[nH]nc(OC3CCOC3)c2c(CO)n1)c4ccccc4	IC50	=	0.5	1	MAP kinase ERK2	Sub-train	1	0.0703593	0.929641	In
Cpd2476	CHEMBL3654815	Cc1cc(ccn1)c2n[nH]c3cc(NC(=O)N[C@H]4COC[C@@H]4O)ncc23	IC50	=	15.1	1	MAP kinase ERK2	Sub-train	1	0.113991	0.886009	In
Cpd2477	CHEMBL3969395	CCC(NC(=O)Nc1cc2[nH]nc(OC)c2c(CO)n1)c3ccccn3	IC50	=	206.1	1	MAP kinase ERK2	Test	1	0.161113	0.838887	In
Cpd2478	CHEMBL4110554	C[C@@H](NC(=O)Nc1cc2[nH]nc(NC(=O)C)c2c(C)n1)c3ccccc3	IC50	=	127	1	MAP kinase ERK2	Test	1	0.0768809	0.923119	In
Cpd2479	CHEMBL3920282	COCCOc1n[nH]c2cc(NC(=O)N[C@@H]3CN(C)C[C@H]3c4ccccc4)ncc12	IC50	=	169.1	1	MAP kinase ERK2	Sub-train	1	0.0602471	0.939753	In
Cpd2480	CHEMBL3936722	CC(C)(O)[C@@H](NC(=O)Nc1cc2[nH]nc(OCC(F)F)c2c(CO)n1)c3ccc(F)cc3	IC50	=	0.7	1	MAP kinase ERK2	Sub-train	1	0.0409018	0.959098	In
Cpd2481	CHEMBL3960094	OCc1nc(NC(=O)N[C@@H](c2ccccc2)C3(O)CC3)cc4[nH]nc(OCC(F)F)c14	IC50	=	0.8	1	MAP kinase ERK2	Sub-train	1	0.0275877	0.972412	In
Cpd2482	CHEMBL4110858	COc1n[nH]c2cc(NC(=O)N[C@H](C)c3ccc(F)cc3)nc(c12)C(C)(C)O	IC50	=	64.2	1	MAP kinase ERK2	Sub-train	1	0.210574	0.789426	In
Cpd2483	CHEMBL4106565	CNC(=O)c1nc(NC(=O)N[C@H](C)c2ccccc2)cc3[nH]nc(OC)c13	IC50	=	139.8	1	MAP kinase ERK2	Sub-train	1	0.198308	0.801692	In
Cpd2484	CHEMBL4111994	COc1n[nH]c2cc(NC(=O)N[C@H](C)c3ccccc3)nc(N)c12	IC50	=	5	1	MAP kinase ERK2	Sub-train	1	0.089669	0.910331	In
Cpd2485	CHEMBL3978575	COc1n[nH]c2cc(NC(=O)NC3CCCC3c4ccccc4)ncc12	IC50	=	144.2	1	MAP kinase ERK2	Sub-train	1	0.0330997	0.9669	In
Cpd2486	CHEMBL452	[O-][N+](=O)c1ccc2NC(=O)CN=C(c3ccccc3Cl)c2c1	IC50	=	Not Active	-1	MAP kinase ERK2	Sub-train	-1	0.9407	0.0592998	In
Cpd2487	CHEMBL1601669	CC(C)CCC[C@@H](C)[C@H]1CC[C@H]2\C(=C\C=C/3\C[C@@H](O)C[C@H](O)C3=C)\CCC[C@]12C	IC50	=	Not Active	-1	MAP kinase ERK2	Sub-train	-1	0.987951	0.0120489	In
Cpd2491	CHEMBL3907826	CCNc1n[nH]c2cc(NC(=O)NC(C(=O)N(CC)CC)c3ccc(F)cc3)ncc12	IC50	=	421	1	MAP kinase ERK2	Sub-train	1	0.066801	0.933199	In
Cpd2492	CHEMBL439	Nc1ccc(cc1)S(=O)(=O)Nc2ncccn2	IC50	=	Not Active	-1	MAP kinase ERK2	Sub-train	-1	0.962562	0.0374381	In
Cpd2494	CHEMBL181	CC1=NS(=O)(=O)c2cc(Cl)ccc2N1	IC50	=	Not Active	-1	MAP kinase ERK2	Sub-train	-1	0.983773	0.0162274	In
Cpd2495	CHEMBL1200624	CC(=O)O[C@H]1CC[C@@H]2[C@H]3CC[C@@]4(C)[C@@H](CC[C@@]4(OC(=O)C)C#C)[C@@H]3CCC2=C1	IC50	=	Not Active	-1	MAP kinase ERK2	Sub-train	-1	0.875973	0.124027	In
Cpd2496	CHEMBL1200600	C[C@H]1C[C@H]2[C@@H]3CC[C@](O)(C(=O)C)[C@@]3(C)C[C@H](O)[C@]2(F)[C@@]4(C)C=CC(=O)C=C14	IC50	=	Not Active	-1	MAP kinase ERK2	Sub-train	-1	0.993028	0.00697237	In
Cpd2497	CHEMBL43064	C(\C=C\c1ccccc1)N2CCN(CC2)C(c3ccccc3)c4ccccc4	IC50	=	Not Active	-1	MAP kinase ERK2	Sub-train	-1	0.668506	0.331494	In
Cpd2498	CHEMBL1200585	C[C@]1(O)CC[C@H]2[C@@H]3CC[C@H]4CC(=O)\C(=C/O)\C[C@]4(C)[C@H]3CC[C@]12C	IC50	=	Not Active	-1	MAP kinase ERK2	Test	-1	0.993381	0.00661866	In
Cpd2500	CHEMBL1231	CCN(CC)CC#CCOC(=O)C(O)(C1CCCCC1)c2ccccc2	IC50	=	Not Active	-1	MAP kinase ERK2	Sub-train	-1	0.816427	0.183573	In
Cpd2501	CHEMBL310555	Oc1cccc2cccnc12	IC50	=	Not Active	-1	MAP kinase ERK2	Sub-train	-1	0.970144	0.0298561	In
Cpd2503	CHEMBL286398	CC(O)CO	IC50	=	Not Active	-1	MAP kinase ERK2	Sub-train	-1	0.999605	0.000395451	In
Cpd2504	CHEMBL2312652	CN1CCC(CC1)NC(=O)c2cnc(Nc3cc(Cl)cc(Cl)c3)nc2N[C@@H]4COC[C@H]4O	IC50	=	30000	-1	MAP kinase ERK2	Sub-train	1	0.417602	0.582398	In
Cpd2505	CHEMBL2312649	CN(C)C1CCC(CC1)Nc2nc(Nc3cc(Cl)cc(Cl)c3)ncc2C(=O)NC4CCN(C)CC4	IC50	=	30000	-1	MAP kinase ERK2	Sub-train	-1	0.549245	0.450755	In
Cpd2506	CHEMBL386630	C[C@]12CC[C@H]3[C@@H](CCC4=CC(=O)CC[C@]34C)[C@@H]1CC[C@@H]2O	IC50	=	Not Active	-1	MAP kinase ERK2	Sub-train	-1	0.985883	0.0141167	In
Cpd2507	CHEMBL625	c1ccc2[nH]c(nc2c1)c3cscn3	IC50	=	Not Active	-1	MAP kinase ERK2	Sub-train	-1	0.97949	0.0205103	In
Cpd2508	CHEMBL269732	CO[C@@H]1C[C@@H](CC[C@H]1O)\C=C(/C)\[C@H]2OC(=O)[C@@H]3CCCCN3C(=O)C(=O)[C@]4(O)O[C@H]([C@H](C[C@@H](C)C\C(=C\[C@@H](CC=C)C(=O)C[C@H](O)[C@H]2C)\C)OC)[C@H](C[C@H]4C)OC	IC50	=	Not Active	-1	MAP kinase ERK2	Sub-train	-1	0.956686	0.0433137	In
Cpd2509	CHEMBL1087	CN1CCCCC1C(=O)Nc2c(C)cccc2C	IC50	=	Not Active	-1	MAP kinase ERK2	Sub-train	-1	0.96457	0.0354299	In
Cpd2510	CHEMBL1501	CC(=O)OCC(=O)[C@@]12OC(C)(C)O[C@@H]1C[C@H]3[C@@H]4C[C@H](F)C5=CC(=O)C=C[C@]5(C)[C@@]4(F)[C@@H](O)C[C@]23C	IC50	=	Not Active	-1	MAP kinase ERK2	Sub-train	-1	0.976265	0.0237349	In
Cpd2511	CHEMBL1444	N#Cc1ccc(cc1)C(c2ccc(cc2)C#N)n3cncn3	IC50	=	Not Active	-1	MAP kinase ERK2	Sub-train	-1	0.82361	0.17639	In
Cpd2512	CHEMBL424	OC(=O)c1ccccc1O	IC50	=	Not Active	-1	MAP kinase ERK2	Test	-1	0.95411	0.04589	In
Cpd2513	CHEMBL289469	CN1C2CCCC1CC(C2)NC(=O)c3nn(C)c4ccccc34	IC50	=	Not Active	-1	MAP kinase ERK2	Sub-train	-1	0.950942	0.0490577	In
Cpd2514	CHEMBL637	COc1ccc(cc1)C(CN(C)C)C2(O)CCCCC2	IC50	=	Not Active	-1	MAP kinase ERK2	Sub-train	-1	0.995362	0.00463762	In
Cpd2515	CHEMBL275742	CC(C)NC[C@@H](O)COc1cccc2ccccc12	IC50	=	Not Active	-1	MAP kinase ERK2	Test	-1	0.978944	0.0210556	In
Cpd2516	CHEMBL38737	CC(=N)S	IC50	=	Not Active	-1	MAP kinase ERK2	Sub-train	-1	0.999748	0.000252386	In
Cpd2519	CHEMBL661	Cc1nnc2CN=C(c3ccccc3)c4cc(Cl)ccc4n12	IC50	=	Not Active	-1	MAP kinase ERK2	Sub-train	-1	0.862213	0.137787	In
Cpd2520	CHEMBL983	[Cl-].[Cl-].C[N+](C)(C)CCOC(=O)CCC(=O)OCC[N+](C)(C)C	IC50	=	Not Active	-1	MAP kinase ERK2	Test	-1	0.999858	0.000142401	In
Cpd2521	CHEMBL773	NCC(=O)O	IC50	=	Not Active	-1	MAP kinase ERK2	Sub-train	-1	0.999254	0.000745823	In
Cpd2522	CHEMBL311350	CCN1C=C(C(=O)O)C(=O)c2cnc(nc12)N3CCCC3	IC50	=	Not Active	-1	MAP kinase ERK2	Sub-train	-1	0.988432	0.0115685	In
Cpd2523	CHEMBL357995	Cc1cc2c(OCC(CNC(C)(C)C)OC(=O)c3ccccc3)cccc2[nH]1	IC50	=	Not Active	-1	MAP kinase ERK2	Sub-train	-1	0.537879	0.462121	In
Cpd2524	CHEMBL2312646	CN1CCC(CC1)NC(=O)c2cnc(NCc3cc(Cl)ccc3Cl)nc2NC4CCCC4	IC50	=	30000	-1	MAP kinase ERK2	Sub-train	1	0.34976	0.65024	In
Cpd2525	CHEMBL3608459	OC[C@@H](N1CCCn2cc(cc2C1=O)c3ccnc(N[C@@H]4C[C@H](O)C(F)(F)C4)n3)c5cccc(Cl)c5	IC50	=	0.26	1	MAP kinase ERK2	Sub-train	1	0.0892625	0.910738	In
Cpd2526	CHEMBL3608458	OC[C@@H](N1CCCn2cc(cc2C1=O)c3ccnc(N[C@@H]4C[C@H](O)[C@@H](F)C4)n3)c5ccccc5	IC50	=	0.19	1	MAP kinase ERK2	Test	1	0.144644	0.855356	In
Cpd2527	CHEMBL2105617	CCC1C2CC3C4N(C)c5ccccc5C46CC(C2[C@H]6O)N3C1O	IC50	=	Not Active	-1	MAP kinase ERK2	Sub-train	-1	0.993397	0.00660319	In
Cpd2528	CHEMBL1586	C[C@H]1C[C@H]2[C@@H]3CCC4=CC(=O)C=C[C@]4(C)[C@@]3(Cl)[C@@H](O)C[C@]2(C)[C@@]1(O)C(=O)CO	IC50	=	Not Active	-1	MAP kinase ERK2	Sub-train	-1	0.996656	0.00334356	In
Cpd2529	CHEMBL3604851	Brc1cccc(CN2C=CC(=CC2=O)N3CCc4[nH]nc(c4C3)c5ccncc5)c1	IC50	=	0.2	1	MAP kinase ERK2	Sub-train	1	0.0915524	0.908448	In
Cpd2530	CHEMBL3604847	O=C1C=C(C=CN1Cc2ccccc2)N3CCc4[nH]nc(c4C3)c5ccncc5	IC50	=	3	1	MAP kinase ERK2	Sub-train	1	0.180143	0.819857	In
Cpd2531	CHEMBL838	CCOC(=O)[C@H](CCc1ccccc1)N[C@H]2CCc3ccccc3N(CC(=O)O)C2=O	IC50	=	Not Active	-1	MAP kinase ERK2	Sub-train	-1	0.871229	0.128771	In
Cpd2534	CHEMBL3590115	CNC(=O)c1ccccc1Nc2cc(NC3CCOCC3)ncc2Cl	IC50	=	260	1	MAP kinase ERK2	Sub-train	1	0.474296	0.525704	In
Cpd2536	CHEMBL802	Nc1cc(nc(N)[n+]1[O-])N2CCCCC2	IC50	=	Not Active	-1	MAP kinase ERK2	Sub-train	-1	0.99704	0.00295978	In
Cpd2537	CHEMBL420	NC(=N)N\N=C\c1c(Cl)cccc1Cl	IC50	=	Not Active	-1	MAP kinase ERK2	Sub-train	-1	0.977711	0.022289	In
Cpd2538	CHEMBL1200845	CC1(C)O[C@@H]2C[C@H]3[C@@H]4CCC5=CC(=O)CC[C@]5(C)[C@@]4(F)[C@@H](O)C[C@]3(C)[C@@]2(O1)C(=O)CCl	IC50	=	Not Active	-1	MAP kinase ERK2	Sub-train	-1	0.997331	0.00266932	In
Cpd2539	CHEMBL870	NCCCC(O)(P(=O)(O)O)P(=O)(O)O	IC50	=	Not Active	-1	MAP kinase ERK2	Sub-train	-1	0.921631	0.0783685	Outlier
Cpd2540	CHEMBL1922211	CC[C@H](Nc1nc(NCc2cccnc2)c3ncn(C(C)C)c3n1)C(O)C(C)(C)C	IC50	=	23000	-1	MAP kinase ERK2	Sub-train	-1	0.877098	0.122902	In
Cpd2541	CHEMBL1922215	CC[C@H](Nc1nc(NCc2ccccc2)c3ncn(C(C)C)c3n1)C(O)C(C)C	IC50	=	88000	-1	MAP kinase ERK2	Sub-train	-1	0.795109	0.204891	In
Cpd2542	CHEMBL1455	CN(C)c1nc(nc(n1)N(C)C)N(C)C	IC50	=	Not Active	-1	MAP kinase ERK2	Sub-train	-1	0.997161	0.00283931	In
Cpd2545	CHEMBL9419	CC(=O)Nc1cccc(O)c1	IC50	=	Not Active	-1	MAP kinase ERK2	Test	-1	0.977873	0.0221268	In
Cpd2546	CHEMBL1200629	[Br-].CC(=O)O[C@H]1C[C@@H]2CC[C@@H]3[C@H](CC[C@@]4(C)[C@H]3C[C@@H]([C@@H]4OC(=O)C)[N+]5(C)CCCCC5)[C@@]2(C)C[C@@H]1N6CCCCC6	IC50	=	Not Active	-1	MAP kinase ERK2	Sub-train	-1	0.998294	0.00170644	In
Cpd2547	CHEMBL1504	CC1(C)O[C@@H]2C[C@H]3[C@@H]4CCC5=CC(=O)C=C[C@]5(C)[C@@]4(F)[C@@H](O)C[C@]3(C)[C@@]2(O1)C(=O)CO	IC50	=	Not Active	-1	MAP kinase ERK2	Test	-1	0.992757	0.00724291	In
Cpd2552	CHEMBL1371125	c1ccc2c(c1)c3cccc4ccc5cccc2c5c34	IC50	=	Not Active	-1	MAP kinase ERK2	Sub-train	-1	0.978447	0.0215531	In
Cpd2553	CHEMBL195437	CCCCCCCCc1ccc(O)cc1	IC50	=	Not Active	-1	MAP kinase ERK2	Test	-1	0.97993	0.0200703	In
Cpd2554	CHEMBL3663004	Cc1cc(ccn1)c2n[nH]c3cc(NC(=O)NC[C@H]4COCCO4)ncc23	IC50	=	2.622	1	MAP kinase ERK2	Sub-train	1	0.131576	0.868424	In
Cpd2556	CHEMBL3929048	CCOc1n[nH]c2cc(NC(=O)N[C@@H](COC)c3ccc(F)cc3)ncc12	IC50	=	579.6	-1	MAP kinase ERK2	Test	1	0.0558515	0.944148	In
Cpd2557	CHEMBL4106811	COc1n[nH]c2cc(NC(=O)N[C@H]3CN(C)C[C@@H]3c4ccccc4C)ncc12	IC50	=	5.8	1	MAP kinase ERK2	Sub-train	1	0.0998946	0.900105	In
Cpd2558	CHEMBL4106995	COC[C@@H](NC(=O)Nc1cc2[nH]nc(Nc3ccccc3)c2cn1)c4ccc(F)cc4	IC50	=	62.3	1	MAP kinase ERK2	Sub-train	1	0.0110165	0.988983	In
Cpd2559	CHEMBL4113711	COC[C@@H](NC(=O)Nc1cc2[nH]nc(Nc3ccccc3)c2cn1)c4ccccc4	IC50	=	15.5	1	MAP kinase ERK2	Sub-train	1	0.0112242	0.988776	In
Cpd2560	CHEMBL4115146	C[C@@H](O)[C@@H](NC(=O)Nc1cc2[nH]nc(OCCO)c2cn1)c3ccccc3	IC50	=	0.5	1	MAP kinase ERK2	Sub-train	1	0.0327956	0.967204	In
Cpd2561	CHEMBL4112460	COCCOc1n[nH]c2cc(NC(=O)NC[C@@H](C)c3ccccc3)ncc12	IC50	=	23.21	1	MAP kinase ERK2	Sub-train	1	0.0545641	0.945436	In
Cpd2562	CHEMBL4112579	C[C@@H](NC(=O)Nc1cc2[nH]nc3N[C@H](C)Cc(n1)c23)c4ccccc4	IC50	=	5.9	1	MAP kinase ERK2	Sub-train	1	0.0784478	0.921552	In
Cpd2563	CHEMBL3663068	Cc1cc(ccn1)c2n[nH]c3cc(NC(=O)NCc4cccc(c4)S(=O)(=O)C)ncc23	IC50	=	0.1591	1	MAP kinase ERK2	Test	1	0.0864861	0.913514	In
Cpd2564	CHEMBL3663070	C[C@@H](CNC(=O)Nc1cc2[nH]nc(c3ccnc(C)c3)c2cn1)c4ccccc4	IC50	=	1.288	1	MAP kinase ERK2	Sub-train	1	0.0117098	0.98829	In
Cpd2565	CHEMBL3639619	COCCNC(=O)Nc1cc2[nH]nc(c3ccc4cn(C)nc4c3)c2cn1	IC50	=	13.56	1	MAP kinase ERK2	Test	1	0.169935	0.830065	In
Cpd2566	CHEMBL3663074	COCCNC(=O)Nc1cc2[nH]nc(c3ccc4nn(C)cc4c3)c2cn1	IC50	=	0.7996	1	MAP kinase ERK2	Sub-train	1	0.171558	0.828442	In
Cpd2568	CHEMBL3663091	COc1cccc(F)c1CN2CCC[C@H](C2)NC(=O)Nc3cc4[nH]nc(c5ccnc(F)c5)c4cn3	IC50	=	1.062	1	MAP kinase ERK2	Sub-train	1	0.00992882	0.990071	In
Cpd2569	CHEMBL3913064	CCNc1n[nH]c2cc(NC(=O)N[C@@H]3CN(C)C[C@H]3c4ccccc4)ncc12	IC50	=	1	1	MAP kinase ERK2	Test	1	0.047301	0.952699	In
Cpd2570	CHEMBL4109382	C[C@@H](NC(=O)Nc1cc2[nH]nc(N)c2cn1)c3cccc(F)c3	IC50	=	3.2	1	MAP kinase ERK2	Sub-train	1	0.0245386	0.975461	In
Cpd2571	CHEMBL4111390	COC[C@@H](NC(=O)Nc1cc2[nH]nc(N)c2c(C)n1)c3ccccc3	IC50	=	3	1	MAP kinase ERK2	Sub-train	1	0.0436706	0.956329	In
Cpd2572	CHEMBL4107882	C[C@H](Nc1n[nH]c2cc(NC(=O)N[C@H](C)c3ccccc3)ncc12)C(F)F	IC50	=	2.2	1	MAP kinase ERK2	Test	1	0.0242286	0.975771	In
Cpd2573	CHEMBL806	CC(C)C(=O)Nc1ccc(c(c1)C(F)(F)F)[N+](=O)[O-]	IC50	=	Not Active	-1	MAP kinase ERK2	Sub-train	-1	0.975044	0.024956	In
Cpd2583	CHEMBL4115359	COCc1nc(NC(=O)N[C@H](COC(F)F)c2ccccc2)cc3[nH]nc(OC)c13	IC50	=	8.6	1	MAP kinase ERK2	Test	1	0.0720022	0.927998	In
Cpd2584	CHEMBL3897629	C[C@H](O)COc1n[nH]c2cc(NC(=O)N[C@H](C)c3ccccc3)ncc12	IC50	=	6.3	1	MAP kinase ERK2	Sub-train	1	0.0441731	0.955827	In
Cpd2586	CHEMBL4107945	CO[C@@H]1CC[C@H](CC1)c2cnc(N)c(n2)c3ccc(C(=O)N[C@H](CN)c4cc(F)cc(I)c4)c(F)c3	IC50	=	0.0107	1	MAP kinase ERK2	Sub-train	1	0.0991026	0.900897	In
Cpd2590	CHEMBL4113761	COC[C@@H](NC(=O)Nc1cc2[nH]nc(OCc3ccccn3)c2cn1)c4ccccc4	IC50	=	1.3	1	MAP kinase ERK2	Sub-train	1	0.0123788	0.987621	In
Cpd2591	CHEMBL4110555	COC[C@@H](NC(=O)Nc1cc2[nH]nc(OCCO)c2cn1)c3ccccc3	IC50	=	1.6	1	MAP kinase ERK2	Sub-train	1	0.0477147	0.952285	In
Cpd2592	CHEMBL2312290	COc1ccc(CCNc2ncc(C(=O)NCCCN3CCCC3=O)c(NC4CCCC4)n2)cc1OC	IC50	=	2130	-1	MAP kinase ERK2	Test	-1	0.706749	0.293251	In
Cpd2593	CHEMBL3695631	CCNC(=O)Nc1ccc2ncc(Nc3cccnc3)nc2n1	IC50	>	100000	-1	MAP kinase ERK2	Sub-train	1	0.119504	0.880496	In
Cpd2595	CHEMBL3935098	Nc1ncc(cc1c2ccc3C(=O)N(Cc4ccccc4)CCOc3c2)C5CCS(=O)(=O)CC5	IC50	=	1000	-1	MAP kinase ERK2	Sub-train	1	0.198855	0.801145	In
Cpd2596	CHEMBL4109126	Nc1ncc(nc1c2ccc(C(=O)N[C@@H]3CCCN(Cc4ccccc4F)C3)c(F)c2)C5CCOCC5	IC50	=	169	1	MAP kinase ERK2	Sub-train	1	0.0459677	0.954032	In
Cpd2602	CHEMBL3920520	Nc1ncc(cc1c2ccc(C(=O)NCc3ccnnc3)c(F)c2)C4CCOCC4	IC50	=	381	1	MAP kinase ERK2	Sub-train	1	0.0250668	0.974933	In
Cpd2603	CHEMBL4113556	Nc1ncc(nc1c2ccc(C(=O)N[C@H](CO)c3cccc(c3)C(F)(F)F)c(F)c2)[C@@H]4CC[C@@H](O)CC4	IC50	=	187	1	MAP kinase ERK2	Sub-train	1	0.0234167	0.976583	In
Cpd2606	CHEMBL4107166	C[C@@H](O)[C@@H](NC(=O)Nc1cc2[nH]nc(N3CCC3)c2cn1)c4ccc(F)cc4	IC50	=	2.8	1	MAP kinase ERK2	Sub-train	1	0.0527661	0.947234	In
Cpd2607	CHEMBL3695633	CCNC(=O)Nc1ccc2ncc(Nc3ccc(C)c(OC)c3)nc2n1	IC50	=	26900	-1	MAP kinase ERK2	Sub-train	1	0.0714975	0.928503	In
Cpd2608	CHEMBL4112936	CS(=O)(=O)N[C@@H]1CC[C@@H](CC1)c2cnc(N)c(n2)c3ccc(C(=O)N[C@H](CO)c4cccc(Cl)c4)c(F)c3	IC50	=	2.9	1	MAP kinase ERK2	Sub-train	1	0.117747	0.882253	In
Cpd2609	CHEMBL4107690	C[C@@H](NC(=O)c1ccc(cc1F)c2cc(cnc2N)[C@@H]3CC[C@@H](O)CC3)c4cc(F)cc(c4)S(=O)(=O)C	IC50	=	0.345	1	MAP kinase ERK2	Sub-train	1	0.0501011	0.949899	In
Cpd2611	CHEMBL4108402	Nc1ncc(nc1c2ccc(C(=O)N[C@H](CO)c3cc(F)cc(I)c3)c(F)c2)[C@@H]4CC[C@@H](O)C(F)(F)C4	IC50	=	0.0581	1	MAP kinase ERK2	Sub-train	1	0.03835	0.96165	In
Cpd2614	CHEMBL4114250	C[C@@H](NC(=O)Nc1cc2[nH]nc(N[C@H](C)c3ccccn3)c2cn1)c4ccccc4	IC50	=	13.4	1	MAP kinase ERK2	Sub-train	1	0.0100659	0.989934	In
Cpd2615	CHEMBL3928671	COc1n[nH]c2cc(NC(=O)N[C@@H](c3ccccc3)C(C)(C)O)nc(C4=NNC(=O)O4)c12	IC50	=	1402	-1	MAP kinase ERK2	Test	1	0.146379	0.853621	In
Cpd2616	CHEMBL3985624	C[C@H](O)[C@@H](NC(=O)Nc1cc2[nH]nc(N3CCOCC3)c2cn1)c4ccc(F)cc4	IC50	=	0.2	1	MAP kinase ERK2	Sub-train	1	0.0572983	0.942702	In
Cpd2617	CHEMBL4111054	CCOc1cc(Nc2ncc3CCN(Cc3n2)C(=O)N[C@H](C)c4ccc(Cl)c(Cl)c4)ccn1	IC50	=	5.6	1	MAP kinase ERK2	Sub-train	1	0.01031	0.98969	In
Cpd2618	CHEMBL4111564	CC(C)Nc1ncc2CCN(Cc2n1)C(=O)N[C@H]([C@H]3CCCN3C)c4ccc(Cl)c(Cl)c4	IC50	=	2.9	1	MAP kinase ERK2	Test	1	0.133643	0.866357	In
Cpd2619	CHEMBL3949251	CC1(C)CCC(N1)[C@@H](NC(=O)N2CCc3cnc(NC4CCOCC4)nc3C2)c5ccc(cc5F)C(F)(F)F	IC50	=	147.8	1	MAP kinase ERK2	Test	1	0.0383045	0.961696	In
Cpd2626	CHEMBL3979344	CCOc1n[nH]c2cc(NC(=O)NC(C(=O)N(C)C)c3ccc(F)cc3)ncc12	IC50	=	430.2	1	MAP kinase ERK2	Sub-train	1	0.0898857	0.910114	In
Cpd2627	CHEMBL4115635	C[C@@H](NC(=O)Nc1cc2[nH]nc(OC3CCNCC3)c2cn1)c4ccccc4	IC50	=	128	1	MAP kinase ERK2	Sub-train	1	0.0320787	0.967921	In
Cpd2628	CHEMBL3976402	COc1n[nH]c2cc(NC(=O)NC(c3ccc(F)cc3)C(C)(C)O)ncc12	IC50	=	10.9	1	MAP kinase ERK2	Sub-train	1	0.0876518	0.912348	In
Cpd2630	CHEMBL4110568	COC[C@@H](NC(=O)Nc1cc2[nH]nc(OC)c2c(n1)C(F)(F)F)c3ccccc3	IC50	=	121.2	1	MAP kinase ERK2	Sub-train	1	0.164908	0.835092	In
Cpd2631	CHEMBL4106812	COc1n[nH]c2cc(NC(=O)N[C@H](C)c3ccc(F)cc3)nc(c12)C(F)(F)F	IC50	=	494.8	1	MAP kinase ERK2	Sub-train	1	0.134508	0.865492	In
Cpd2632	CHEMBL3950851	C[C@H](O)[C@@H](NC(=O)Nc1cc2[nH]nc(OCCO)c2c(CO)n1)c3ccc(F)cc3	IC50	=	0.5	1	MAP kinase ERK2	Sub-train	1	0.0700898	0.92991	In
Cpd2633	CHEMBL4109269	CC(C)CN1C[C@H](NC(=O)Nc2cc3[nH]nc(OCC(F)F)c3cn2)[C@H](C1)c4ccccc4	IC50	=	133.3	1	MAP kinase ERK2	Sub-train	1	0.024857	0.975143	In
Cpd2635	CHEMBL3671092	CCn1cc(cn1)c2cnc3ccc(NC(=O)NCCCCc4ccccc4)nc3n2	IC50	=	4	1	MAP kinase ERK2	Sub-train	1	0.0252669	0.974733	In
Cpd2636	CHEMBL3671093	Cn1cc(cn1)c2cnc3ccc(NC(=O)NCCCCc4ccccc4)nc3n2	IC50	=	4	1	MAP kinase ERK2	Sub-train	1	0.0291913	0.970809	In
Cpd2637	CHEMBL3671102	CC(CCCc1ccccc1)NC(=O)Nc2ccc3ncc(nc3n2)c4cnn(C)c4	IC50	=	2	1	MAP kinase ERK2	Sub-train	1	0.0252419	0.974758	In
Cpd2638	CHEMBL3671104	C[C@H](CCCc1ccccc1)NC(=O)Nc2ccc3ncc(nc3n2)N4CCOCC4	IC50	=	3	1	MAP kinase ERK2	Sub-train	1	0.0284619	0.971538	In
Cpd2640	CHEMBL3671124	N[C@@H](Cc1ccc(cc1)c2cnc3ccc(NC(=O)NCCCCc4ccccc4)nc3n2)C(=O)O	IC50	=	5	1	MAP kinase ERK2	Sub-train	1	0.00434714	0.995653	In
Cpd2641	CHEMBL3671128	COCc1cccc(c1)c2cnc3ccc(NC(=O)N[C@H](C)CCCc4ccccc4)nc3n2	IC50	=	24	1	MAP kinase ERK2	Sub-train	1	0.0075308	0.992469	In
Cpd2644	CHEMBL4111879	C[C@@H]1C[C@@H](CCO1)c2cnc(N)c(n2)c3ccc(cc3)C(=O)NCc4cccc(c4)S(=O)(=O)C	IC50	=	7.76	1	MAP kinase ERK2	Sub-train	1	0.130906	0.869094	In
Cpd2645	CHEMBL3695642	CCNC(=O)Nc1ccc2ncc(nc2n1)c3cnn(C)c3	IC50	=	107	1	MAP kinase ERK2	Sub-train	1	0.343455	0.656545	In
Cpd2646	CHEMBL4111125	Nc1ncc(nc1c2ccc(C(=O)N[C@H](CO)c3cc(F)cc(I)c3)c(F)c2)[C@@H]4CC[C@@H](O)C4	IC50	=	0.0684	1	MAP kinase ERK2	Sub-train	1	0.0744623	0.925538	In
Cpd2648	CHEMBL3663051	COC[C@H](NC(=O)Nc1cc2[nH]nc(c3cnn(C)c3)c2cn1)c4ccccc4	IC50	=	31.95	1	MAP kinase ERK2	Sub-train	1	0.078432	0.921568	In
Cpd2649	CHEMBL3933758	CC(C)(O)[C@@H](NC(=O)Nc1cc2[nH]nc(N3CCC3)c2cn1)c4ccc(F)cc4	IC50	=	1.1	1	MAP kinase ERK2	Sub-train	1	0.0560071	0.943993	In
Cpd2650	CHEMBL462547	CCOC(=O)N	IC50	=	Not Active	-1	MAP kinase ERK2	Sub-train	-1	0.999302	0.000698213	Outlier
Cpd2651	CHEMBL185	FC1=CNC(=O)NC1=O	IC50	=	Not Active	-1	MAP kinase ERK2	Sub-train	-1	0.998195	0.00180546	In
Cpd2652	CHEMBL3891992	COc1ccccc1CNC(=O)Nc2cc3[nH]nc(OC)c3cn2	IC50	=	63.1	1	MAP kinase ERK2	Sub-train	1	0.0583978	0.941602	In
Cpd2653	CHEMBL4113664	COc1n[nH]c2cc(NC(=O)N[C@H](C)c3ccc(F)c(Cl)c3)ncc12	IC50	=	53.1	1	MAP kinase ERK2	Sub-train	1	0.0392165	0.960783	In
Cpd2654	CHEMBL4106641	COc1n[nH]c2cc(NC(=O)N[C@H](C)c3cccc(Cl)c3)ncc12	IC50	=	42.2	1	MAP kinase ERK2	Sub-train	1	0.0379795	0.962021	In
Cpd2655	CHEMBL4109669	COCCOc1n[nH]c2cc(NC(=O)N[C@H](c3ccc(Cl)cc3)C(C)(C)O)ncc12	IC50	=	119.1	1	MAP kinase ERK2	Sub-train	1	0.0846447	0.915355	In
Cpd2656	CHEMBL458019	[Cl-].[Cl-].C[n+]1ccc(cc1)c2cc[n+](C)cc2	IC50	=	Not Active	-1	MAP kinase ERK2	Sub-train	-1	0.998473	0.00152657	In
Cpd2657	CHEMBL3893923	COC(=O)Nc1n[nH]c2cc(NC(=O)NC(C)c3ccc(F)c(F)c3)ncc12	IC50	=	3.1	1	MAP kinase ERK2	Sub-train	1	0.0347998	0.9652	In
Cpd2658	CHEMBL4108268	C[C@@H](NC(=O)Nc1cc2[nH]nc(NCc3cccnc3)c2cn1)c4ccccc4	IC50	=	0.7	1	MAP kinase ERK2	Test	1	0.00976336	0.990237	In
Cpd2659	CHEMBL4114512	COCC(=O)Nc1n[nH]c2cc(NC(=O)N[C@H](C)c3ccccc3)ncc12	IC50	=	2.2	1	MAP kinase ERK2	Sub-train	1	0.059783	0.940217	In
Cpd2660	CHEMBL4112799	COC[C@@H](NC(=O)Nc1cc2[nH]nc(NC(C)C)c2cn1)c3ccc(F)cc3	IC50	=	0.7	1	MAP kinase ERK2	Test	1	0.067808	0.932192	In
Cpd2662	CHEMBL3658814	CC(C)OCCNC(=O)Nc1cc2[nH]nc(c3ccnc(C)c3)c2cn1	IC50	=	2.144	1	MAP kinase ERK2	Sub-train	1	0.116064	0.883936	In
Cpd2663	CHEMBL3639576	C[C@H](NC(=O)Nc1cc2[nH]nc(c3ccnc(C)c3)c2cn1)C(=O)O	IC50	=	236.7	1	MAP kinase ERK2	Sub-train	1	0.187853	0.812147	In
Cpd2664	CHEMBL3658825	Cc1cc(ccn1)c2n[nH]c3cc(NC(=O)NCC4(C)CCCO4)ncc23	IC50	=	1.584	1	MAP kinase ERK2	Sub-train	1	0.102335	0.897665	In
Cpd2666	CHEMBL3654784	O=C(N[C@@H]1CCOc2ccccc12)Nc3cc4[nH]nc(C5CC5)c4cn3	IC50	=	69.97	1	MAP kinase ERK2	Test	1	0.0254499	0.97455	In
Cpd2667	CHEMBL3654792	C[C@@H](NC(=O)Nc1cc2[nH]nc(C3CC3(F)F)c2cn1)c4ccccc4	IC50	=	7.708	1	MAP kinase ERK2	Sub-train	1	0.0181632	0.981837	In
Cpd2669	CHEMBL3658789	Cc1cc(ccn1)c2n[nH]c3cc(NC(=O)NCc4nocn4)ncc23	IC50	=	5.665	1	MAP kinase ERK2	Test	1	0.106865	0.893135	In
Cpd2670	CHEMBL3931760	COC(=O)[C@@H]1C[C@@H](CN1)c2cnc(N)c(c2)c3ccc(C(=O)N[C@H](CO)c4cccc(Cl)c4)c(F)c3	IC50	=	24.8	1	MAP kinase ERK2	Sub-train	1	0.120511	0.879489	In
Cpd2671	CHEMBL3915385	Nc1ncc(nc1c2ccc(C(=O)N[C@H](CO)c3ccccc3)c(F)c2)C4COC4	IC50	=	18.8	1	MAP kinase ERK2	Sub-train	1	0.0642016	0.935798	In
Cpd2672	CHEMBL4106603	Cn1nccc1c2cnc(N)c(c2)c3ccc(C(=O)N[C@H](CO)c4cccc(F)c4)c(F)c3	IC50	=	1.07	1	MAP kinase ERK2	Test	1	0.0587442	0.941256	In
Cpd2673	CHEMBL3938025	Cn1cc(CNC(=O)c2ccc(cc2F)c3cc(cnc3N)c4cnn(C)c4)cn1	IC50	=	2610	-1	MAP kinase ERK2	Sub-train	1	0.305736	0.694264	In
Cpd2674	CHEMBL4109471	Cc1nn(C)c(C)c1c2cnc(N)c(n2)c3ccc(C(=O)N[C@H](CO)c4ccccc4)c(F)c3	IC50	=	3.71	1	MAP kinase ERK2	Sub-train	1	0.0507727	0.949227	In
Cpd2675	CHEMBL4111048	Nc1ncc(cc1c2ccc(C(=O)N[C@H](CO)c3ccccc3)c(F)c2)c4cn[nH]c4	IC50	=	4.8	1	MAP kinase ERK2	Sub-train	1	0.016279	0.983721	In
Cpd2677	CHEMBL4114979	Cn1ccc(n1)c2cnc(N)c(c2)c3ccc(C(=O)N[C@H](CO)c4cccc(Cl)c4)c(F)c3	IC50	=	0.0937	1	MAP kinase ERK2	Sub-train	1	0.0485265	0.951474	In
Cpd2679	CHEMBL4108494	C[C@@H]1CN(C[C@H](C)O1)c2cnc(N)c(c2)c3ccc(C(=O)N[C@H](CO)c4ccccc4)c(F)c3	IC50	=	91.3	1	MAP kinase ERK2	Sub-train	1	0.0407927	0.959207	In
Cpd2681	CHEMBL4106790	Nc1ncc(nc1c2ccc(C(=O)N[C@H](CO)c3cccc(Cl)c3)c(F)c2)C4CCOCC4	IC50	=	0.113	1	MAP kinase ERK2	Sub-train	1	0.035213	0.964787	In
Cpd2682	CHEMBL4110805	Nc1ncc(cc1c2ccc(C(=O)N[C@@H]3CCCN(Cc4ccccc4F)C3)c(F)c2)C5CCOCC5	IC50	=	780	-1	MAP kinase ERK2	Test	1	0.0320019	0.967998	In
Cpd2683	CHEMBL3950736	CC(CO)c1cnc(N)c(n1)c2ccc(C(=O)NCc3ccccc3)c(F)c2	IC50	=	274	1	MAP kinase ERK2	Sub-train	1	0.104102	0.895898	In
Cpd2685	CHEMBL3604853	Cc1cccc(CN2C=CC(=CC2=O)N3CCc4[nH]nc(c4C3)c5ccncc5)c1	IC50	=	0.7	1	MAP kinase ERK2	Test	1	0.153406	0.846594	In
Cpd2686	CHEMBL3968462	COc1ccc(cc1F)[C@H](NC(=O)c2ccc3cnc(NC4CSC4)nc3c2)c5cnn(C)c5	IC50	=	13	1	MAP kinase ERK2	Test	1	0.0997718	0.900228	In
Cpd2692	CHEMBL435	NS(=O)(=O)c1cc2c(NCNS2(=O)=O)cc1Cl	IC50	=	Not Active	-1	MAP kinase ERK2	Test	-1	0.99384	0.00616023	In
Cpd2693	CHEMBL1201220	CC(=O)Nc1c(I)c(NC(=O)C)c(I)c(C(=O)O)c1I	IC50	=	Not Active	-1	MAP kinase ERK2	Sub-train	-1	0.999981	1.89603e-05	Outlier
Cpd2694	CHEMBL3663011	CC(NC(=O)Nc1cc2[nH]nc(c3ccnc(C)c3)c2cn1)c4ocnn4	IC50	=	232.5	1	MAP kinase ERK2	Sub-train	1	0.0747792	0.925221	In
Cpd2696	CHEMBL3695641	CCNC(=O)Nc1ccc2ncc(nc2n1)c3c(C)n[nH]c3C	IC50	=	410	1	MAP kinase ERK2	Test	1	0.160044	0.839956	In
Cpd2697	CHEMBL3968878	Fc1cc(ccc1Cl)C(NC(=O)N2CCc3cnc(NC4CCOCC4)nc3C2)c5cn[nH]c5	IC50	=	1.5	1	MAP kinase ERK2	Test	1	0.0173762	0.982624	In
Cpd2698	CHEMBL4115638	C[C@@H](NC(=O)Nc1cc2[nH]nc(NC(=O)N3CC(F)(F)C3)c2cn1)c4ccc(F)cc4	IC50	=	3.4	1	MAP kinase ERK2	Sub-train	1	0.0588726	0.941127	In
Cpd2699	CHEMBL3969660	CC(C)(O)[C@@H](NC(=O)Nc1cc2[nH]nc(NC(=O)N3CC(F)(F)C3)c2cn1)c4ccc(F)cc4	IC50	=	0.4	1	MAP kinase ERK2	Test	1	0.0556922	0.944308	In
Cpd2700	CHEMBL4113106	CC(C)CC(=O)Nc1n[nH]c2cc(NC(=O)N[C@H](C)c3ccccc3)ncc12	IC50	=	1.6	1	MAP kinase ERK2	Test	1	0.0722007	0.927799	In
Cpd2701	CHEMBL1200709	CCN(C(=O)\C=C\C)c1ccccc1C	IC50	=	Not Active	-1	MAP kinase ERK2	Sub-train	-1	0.9774	0.0226003	In
Cpd2702	CHEMBL3695658	CCNC(=O)Nc1ccc2ncc(Nc3cccc(C)c3)nc2n1	IC50	>	100000	-1	MAP kinase ERK2	Sub-train	1	0.0734138	0.926586	In
Cpd2703	CHEMBL3663109	C[C@@H](NC(=O)Nc1cc2[nH]nc(c3cncnc3)c2cn1)c4ccc(F)cc4	IC50	=	2.325	1	MAP kinase ERK2	Sub-train	1	0.0165134	0.983487	In
Cpd2704	CHEMBL3663110	C[C@@H](NC(=O)Nc1cc2[nH]nc(c3cccc(c3)C#N)c2cn1)c4ccccc4	IC50	=	1.549	1	MAP kinase ERK2	Sub-train	1	0.0356129	0.964387	In
Cpd2705	CHEMBL3663125	C[C@@H](NC(=O)Nc1cc2[nH]nc(C3=NOC(C)C3)c2cn1)c4ccccc4	IC50	=	55.95	1	MAP kinase ERK2	Test	1	0.0470995	0.9529	In
Cpd2706	CHEMBL3695650	CCNC(=O)Nc1ccc2ncc(Nc3cc(Cl)c(O)c(Cl)c3)nc2n1	IC50	>	31600	-1	MAP kinase ERK2	Sub-train	1	0.0637794	0.936221	In
Cpd2707	CHEMBL3695651	CCNC(=O)Nc1ccc2ncc(nc2n1)c3cc(Cl)c(O)c(Cl)c3	IC50	=	223	1	MAP kinase ERK2	Sub-train	1	0.138055	0.861945	In
Cpd2708	CHEMBL226403	O=C1NCCc2[nH]c(cc12)c3ccnc(c3)c4cnc5ccccc5c4	IC50	=	3440	-1	MAP kinase ERK2	Test	1	0.0954511	0.904549	In
Cpd2709	CHEMBL3920264	COC1CC(C1)Nc2ncc3ccc(cc3n2)C(=O)N[C@@H](c4ccc(OC)c(F)c4)c5cnn(C)c5	IC50	=	13.8	1	MAP kinase ERK2	Test	1	0.171686	0.828314	In
Cpd2710	CHEMBL3604852	CS(=O)(=O)c1cccc(CN2C=CC(=CC2=O)N3CCc4[nH]nc(c4C3)c5ccncc5)c1	IC50	=	0.4	1	MAP kinase ERK2	Test	1	0.398133	0.601867	In
Cpd2711	CHEMBL3604848	O=C1C=C(C=CN1Cc2ccccc2)N3CCc4[nH]nc(c4C3)c5cccnc5	IC50	=	76	1	MAP kinase ERK2	Sub-train	1	0.189488	0.810512	In
Cpd2712	CHEMBL3604845	O=C1NC(=CC=N1)c2n[nH]c3CCN(Cc23)C4=CC(=O)N(Cc5ccccc5)C=C4	IC50	=	550	-1	MAP kinase ERK2	Test	1	0.0886697	0.91133	In
Cpd2713	CHEMBL3604843	Fc1ccc(cc1)c2n[nH]c3CCN(Cc23)c4ccccn4	IC50	=	89	1	MAP kinase ERK2	Sub-train	-1	0.678749	0.321251	In
Cpd2714	CHEMBL3604842	CC(=O)N1CCc2[nH]nc(c2C1)c3ccc(F)cc3	IC50	=	984	-1	MAP kinase ERK2	Sub-train	-1	0.692504	0.307496	In
Cpd2715	CHEMBL3680615	CCn1nccc1Nc2nccc(n2)C3=CC(=O)N(C=C3)C(=C)c4ccc(Cl)c(F)c4	IC50	=	14.5	1	MAP kinase ERK2	Sub-train	1	0.329017	0.670983	In
Cpd2716	CHEMBL3658725	Cc1cc(ccn1)c2n[nH]c3cc(NC(=O)NC(CN)c4ccccc4)ncc23	IC50	=	0.2316	1	MAP kinase ERK2	Sub-train	1	0.0110559	0.988944	In
Cpd2717	CHEMBL3780571	C1CCN(CC1)c2ccc(Nc3cc4ncc(nc4cn3)c5ccccc5)cc2	IC50	>	100000	-1	MAP kinase ERK2	Sub-train	1	0.197536	0.802464	In
Cpd2718	CHEMBL3780632	C1CN(CCO1)c2ccc(Nc3cncc4ncc(nc34)c5ccccc5)cc2	IC50	=	8430	-1	MAP kinase ERK2	Test	1	0.462711	0.537289	In
Cpd2720	CHEMBL4106452	COc1n[nH]c2cc(NC(=O)N[C@H](C)c3ccccc3)nc(COC(=O)C)c12	IC50	=	2.5	1	MAP kinase ERK2	Sub-train	1	0.178738	0.821262	In
Cpd2722	CHEMBL4113895	Nc1ncc(nc1c2ccc(C(=O)N[C@H](CO)c3ccc(F)c(Cl)c3)c(F)c2)C4CCOCC4	IC50	=	0.139	1	MAP kinase ERK2	Sub-train	1	0.0391889	0.960811	In
Cpd2725	CHEMBL3960210	Nc1ncc(cc1c2ccc(cc2)C(=O)NCc3cccc(c3)C(F)(F)F)C4CCOCC4	IC50	=	20.2	1	MAP kinase ERK2	Sub-train	1	0.0421287	0.957871	In
Cpd2726	CHEMBL3931917	Nc1ncc(cc1c2ccc(C(=O)N[C@H](CO)c3cccc(Cl)c3)c(F)c2)[C@H]4C[C@H]5COCC(=O)N5C4	IC50	=	4.12	1	MAP kinase ERK2	Sub-train	1	0.0349632	0.965037	In
Cpd2727	CHEMBL4109989	Cn1cc(c2cnc(N)c(c2)c3ccc(C(=O)N[C@H](CO)c4cccc(Cl)c4)c(F)c3)c(n1)C#N	IC50	=	0.653	1	MAP kinase ERK2	Test	1	0.143059	0.856941	In
Cpd2728	CHEMBL4112991	Cc1oncc1c2cnc(N)c(c2)c3ccc(C(=O)N[C@H](CO)c4cccc(F)c4)c(F)c3	IC50	=	390	1	MAP kinase ERK2	Sub-train	1	0.0191724	0.980828	In
Cpd2729	CHEMBL3934174	CS(=O)(=O)C1CCCC(C1)c2cnc(N)c(n2)c3ccc(C(=O)NCc4ccccc4)c(F)c3	IC50	=	361	1	MAP kinase ERK2	Sub-train	1	0.476298	0.523702	In
Cpd2731	CHEMBL4114965	COCCn1cc(cn1)c2cnc(N)c(c2)c3ccc(C(=O)N[C@H](CO)c4ccccc4)c(F)c3	IC50	=	1.09	1	MAP kinase ERK2	Sub-train	1	0.0732793	0.926721	In
Cpd2732	CHEMBL4113502	Fc1cc(ccc1C(F)(F)F)[C@H](NC(=O)c2ccc3cnc(NC4CCOCC4)nc3c2)[C@H]5CCCN5	IC50	=	1.8	1	MAP kinase ERK2	Sub-train	1	0.0625157	0.937484	In
Cpd2733	CHEMBL3906062	Cn1cc(cn1)[C@@H](NC(=O)c2ccc3cnc(NC4CCOCC4)nc3c2)c5ccc(Cl)c(F)c5	IC50	=	1.4	1	MAP kinase ERK2	Sub-train	1	0.113238	0.886762	In
Cpd2734	CHEMBL3964771	Cn1ccc(n1)[C@@H](NC(=O)c2cc(F)c3cnc(NC4CCOCC4)nc3c2)c5ccc(Cl)c(F)c5	IC50	=	1.4	1	MAP kinase ERK2	Test	1	0.102143	0.897857	In
Cpd2735	CHEMBL4109322	CS(=O)(=O)N1CCC(CC1)c2cnc(N)c(n2)c3ccc(C(=O)N[C@H](CO)c4ccccc4)c(F)c3	IC50	=	3.89	1	MAP kinase ERK2	Sub-train	1	0.426454	0.573546	In
Cpd2736	CHEMBL4107300	CCOCCc1cnc(N)c(n1)c2ccc(C(=O)N[C@H](CO)c3ccccc3)c(F)c2	IC50	=	177	1	MAP kinase ERK2	Test	1	0.0588168	0.941183	In
Cpd2737	CHEMBL4113807	COC[C@@H](NC(=O)Nc1cc2[nH]nc(OCc3ccccc3)c2cn1)c4ccccc4	IC50	=	1.23	1	MAP kinase ERK2	Sub-train	1	0.00901621	0.990984	In
Cpd2738	CHEMBL3943344	CNc1n[nH]c2cc(NC(=O)NC(C)(COC)c3ccccc3)ncc12	IC50	=	167	1	MAP kinase ERK2	Sub-train	1	0.0838941	0.916106	In
Cpd2739	CHEMBL3921928	CC[C@H](NC(=O)Nc1cc2[nH]nc(N3CCCC3)c2cn1)c4ccccn4	IC50	=	13.8	1	MAP kinase ERK2	Sub-train	1	0.124325	0.875675	In
Cpd2740	CHEMBL4108250	COC[C@@H](NC(=O)Nc1cc2[nH]nc(NC3CCC3)c2cn1)c4ccccc4	IC50	=	0.4	1	MAP kinase ERK2	Sub-train	1	0.0366149	0.963385	In
Cpd2741	CHEMBL3914609	CCNc1n[nH]c2cc(NC(=O)N[C@@H]([C@@H]3CCCO3)c4ccccc4)ncc12	IC50	=	315	1	MAP kinase ERK2	Test	1	0.0256167	0.974383	In
Cpd2742	CHEMBL4111086	C[C@@H](Nc1n[nH]c2cc(NC(=O)N[C@H](C)c3ccccc3)ncc12)C(F)F	IC50	=	2.9	1	MAP kinase ERK2	Test	1	0.0242286	0.975771	In
Cpd2743	CHEMBL4110787	Nc1n[nH]c2cc(NC(=O)N[C@@H]([C@H]3CCCO3)c4ccccc4)ncc12	IC50	=	435	1	MAP kinase ERK2	Sub-train	1	0.0251694	0.974831	In
Cpd2744	CHEMBL3940121	COCC(NC(=O)Nc1cc2[nH]nc(NCC3CCC3)c2cn1)c4ccccc4	IC50	=	0.7	1	MAP kinase ERK2	Sub-train	1	0.0378212	0.962179	In
Cpd2745	CHEMBL4109226	Nc1n[nH]c2c(F)c(NC(=O)N[C@H](COC(F)F)c3ccccc3)ncc12	IC50	=	1.3	1	MAP kinase ERK2	Test	1	0.0221452	0.977855	In
Cpd2746	CHEMBL3926768	CNC(=O)CCc1cnc(N)c(n1)c2ccc(C(=O)NCc3ccccc3)c(F)c2	IC50	=	1090	-1	MAP kinase ERK2	Test	1	0.223011	0.776989	In
Cpd2747	CHEMBL3954933	C[C@@H](NC(=O)c1ccc(cc1F)c2cc(cnc2N)[C@@H]3CCN(C)C(=O)C3)c4ccccc4	IC50	=	69.5	1	MAP kinase ERK2	Sub-train	1	0.191501	0.808499	In
Cpd2748	CHEMBL3663056	C[C@H](Cc1ccccc1)NC(=O)Nc2cc3[nH]nc(c4ccnc(C)c4)c3cn2	IC50	=	3.421	1	MAP kinase ERK2	Sub-train	1	0.0122652	0.987735	In
Cpd2749	CHEMBL3663058	CCNC(=O)Nc1cc2[nH]nc(c3ccc(F)cc3)c2cn1	IC50	=	3.815	1	MAP kinase ERK2	Test	1	0.121084	0.878916	In
Cpd2750	CHEMBL3663064	C[C@@H](NC(=O)Nc1cc2[nH]nc(CO)c2cn1)c3ccccc3	IC50	=	6.162	1	MAP kinase ERK2	Sub-train	1	0.0271509	0.972849	In
Cpd2751	CHEMBL3780543	C1CN(CCO1)c2ccc(Nc3cc4nc(cnc4cn3)c5ccccc5)cc2	IC50	>	100000	-1	MAP kinase ERK2	Sub-train	1	0.232058	0.767942	In
Cpd2752	CHEMBL3782019	COc1ccc(cc1)c2cnc3cncc(Nc4cc(OC)ccc4OC)c3n2	IC50	=	3790	-1	MAP kinase ERK2	Sub-train	-1	0.656015	0.343985	In
Cpd2753	CHEMBL3781696	COc1ccc(cc1)c2cnc3cncc(Nc4ccc(cc4)N5CCOCC5)c3n2	IC50	=	4260	-1	MAP kinase ERK2	Sub-train	1	0.441316	0.558684	In
Cpd2754	CHEMBL3975431	O=C(N1CCc2cnc(NC3CCOCC3)nc2C1)N4CCNCC4c5ccccc5	IC50	=	108.5	1	MAP kinase ERK2	Sub-train	1	0.043198	0.956802	In
Cpd2755	CHEMBL3945407	Fc1ccc(Nc2ncc3CCN(Cc3n2)C(=O)NC4(CCNC4)c5ccc(Cl)cc5)cc1	IC50	=	38.3	1	MAP kinase ERK2	Sub-train	1	0.023385	0.976615	In
Cpd2756	CHEMBL4114339	C[C@@H](NC(=O)N1CCc2cnc(Nc3ccnc(C)n3)nc2C1)c4ccc(Cl)c(Cl)c4	IC50	=	6.9	1	MAP kinase ERK2	Sub-train	1	0.0143921	0.985608	In
Cpd2757	CHEMBL3780515	C1CN(CCO1)c2ccc(Nc3nccc4nc(cnc34)c5ccccc5)cc2	IC50	>	100000	-1	MAP kinase ERK2	Sub-train	1	0.363962	0.636038	In
Cpd2758	CHEMBL3781566	COc1ccc(Nc2nccc3nc(cnc23)c4ccccc4)cc1	IC50	>	100000	-1	MAP kinase ERK2	Sub-train	-1	0.512677	0.487323	In
Cpd2759	CHEMBL3781543	COc1ccccc1Nc2nccc3nc(cnc23)c4ccccc4	IC50	>	100000	-1	MAP kinase ERK2	Test	-1	0.544393	0.455607	In
Cpd2760	CHEMBL3780768	COc1cccc(NC(=O)Nc2nccc3nc(cnc23)c4ccccc4)c1	IC50	>	100000	-1	MAP kinase ERK2	Test	1	0.022464	0.977536	In
Cpd2761	CHEMBL4109635	C[C@@H](NC(=O)Nc1cc2[nH]nc(NCc3ccccn3)c2cn1)c4ccccc4	IC50	=	9.3	1	MAP kinase ERK2	Test	1	0.00950283	0.990497	In
Cpd2762	CHEMBL3695623	CCNC(=O)Nc1ccc2ncc(nc2n1)c3ccc(OCCCN4CCOCC4)cc3	IC50	=	1800	-1	MAP kinase ERK2	Sub-train	1	0.0485249	0.951475	In
Cpd2763	CHEMBL3133821	Oc1cccc(Nc2ccnc3[nH]c4ccccc4c23)c1	IC50	>	10000	-1	MAP kinase ERK2	Sub-train	-1	0.862451	0.137549	In
Cpd2764	CHEMBL3931618	COc1n[nH]c2cc(NC(=O)N[C@@H](c3ccccc3)C4(O)CCCC4)nc([C@H](C)O)c12	IC50	=	6.2	1	MAP kinase ERK2	Sub-train	1	0.0591596	0.94084	In
Cpd2765	CHEMBL3955719	COC[C@@H](NC(=O)Nc1cc2[nH]nc(OC)c2c(n1)[C@H](C)O)c3ccc(F)cc3	IC50	=	42.5	1	MAP kinase ERK2	Sub-train	1	0.155226	0.844774	In
Cpd2766	CHEMBL4115515	CC(O)[C@@H](NC(=O)Nc1cc2[nH]nc(N3CCOCC3)c2cn1)c4ccccc4	IC50	=	0.4	1	MAP kinase ERK2	Sub-train	1	0.058542	0.941458	In
Cpd2767	CHEMBL3929819	COc1n[nH]c2cc(NC(=O)NC(c3ccc(F)c(F)c3)C(C)(C)O)nc(CO)c12	IC50	=	2.1	1	MAP kinase ERK2	Sub-train	1	0.09554	0.90446	In
Cpd2768	CHEMBL4108807	COC(=O)[C@H](NC(=O)Nc1cc2[nH]nc(OC)c2c(CO)n1)c3ccccn3	IC50	=	67	1	MAP kinase ERK2	Test	1	0.269645	0.730355	In
Cpd2769	CHEMBL3924000	COc1n[nH]c2cc(NC(=O)N[C@@H](c3ccc(F)c(Cl)c3)C(C)(C)O)nc(CO)c12	IC50	=	2.2	1	MAP kinase ERK2	Test	1	0.102576	0.897424	In
Cpd2770	CHEMBL4112836	CNc1n[nH]c2cc(NC(=O)N[C@H](C)c3ccccc3)nc(C)c12	IC50	=	11.8	1	MAP kinase ERK2	Sub-train	1	0.0718878	0.928112	In
Cpd2772	CHEMBL3675705	OC[C@@H](N1C=C(F)C(=CC1=O)c2ccnc(NC3CCOCC3)n2)c4ccc(Cl)c(F)c4	IC50	=	145.6	1	MAP kinase ERK2	Sub-train	1	0.230915	0.769085	In
Cpd2773	CHEMBL3675714	OC[C@@H](N1C=CC(=CC1=O)c2cc(NC3CCOCC3)ncn2)c4ccc(Cl)c(F)c4	IC50	=	15.9	1	MAP kinase ERK2	Sub-train	1	0.293234	0.706766	In
Cpd2774	CHEMBL3675722	Cc1nc[nH]c1Nc2nccc(n2)C3=CC(=O)N(C=C3)[C@H](CO)c4ccc(Cl)c(F)c4	IC50	=	3.9	1	MAP kinase ERK2	Sub-train	1	0.211606	0.788394	In
Cpd2775	CHEMBL4110284	COC[C@@H](NC(=O)Nc1cc2[nH]nc(OC3CCOC3)c2cn1)c4ccccc4	IC50	=	1.8	1	MAP kinase ERK2	Sub-train	1	0.0401371	0.959863	In
Cpd2776	CHEMBL3918662	CCOc1ncccc1CNC(=O)Nc2cc3[nH]nc(OC)c3c(CO)n2	IC50	=	324.8	1	MAP kinase ERK2	Test	1	0.147965	0.852035	In
Cpd2777	CHEMBL3941166	COc1n[nH]c2cc(NC(=O)NCc3ccccc3OC(F)F)nc(CO)c12	IC50	=	28.2	1	MAP kinase ERK2	Test	1	0.0714593	0.928541	In
Cpd2778	CHEMBL3947315	CC(C)(O)[C@@H](NC(=O)Nc1cc2[nH]nc(N3CC4C5CCC(C)(O5)C4C3)c2cn1)c6ccc(F)cc6	IC50	=	2.3	1	MAP kinase ERK2	Test	1	0.0324144	0.967586	In
Cpd2779	CHEMBL3977327	COc1n[nH]c2cc(NC(=O)N[C@@H](c3ccccc3)C4(O)CCCC4)nc(CO)c12	IC50	=	2.9	1	MAP kinase ERK2	Sub-train	1	0.0403576	0.959642	In
Cpd2780	CHEMBL3662950	COC[C@H](Cc1ccccc1)NC(=O)Nc2cc3[nH]nc(c4ccnc(C)c4)c3cn2	IC50	=	4.339	1	MAP kinase ERK2	Sub-train	1	0.0118452	0.988155	In
Cpd2781	CHEMBL3662959	C[C@@H](NC(=O)Nc1cc2[nH]nc(c3ccnc(C)c3)c2cn1)c4ccc(F)cn4	IC50	=	0.8579	1	MAP kinase ERK2	Sub-train	1	0.0198361	0.980164	In
Cpd2782	CHEMBL3967428	Cn1cc2CN(CCc2n1)c3n[nH]c4cc(NC(=O)N[C@@H](c5ccc(F)cc5)C(C)(C)O)ncc34	IC50	=	0.2	1	MAP kinase ERK2	Sub-train	1	0.0781887	0.921811	In
Cpd2783	CHEMBL3654750	C[C@@H](NC(=O)Nc1cc2[nH]nc(C(=O)NCC3(CCC3)N(C)C)c2cn1)c4ccccc4	IC50	=	210.8	1	MAP kinase ERK2	Sub-train	1	0.0497958	0.950204	In
Cpd2784	CHEMBL3917936	CCn1ncc2cc3NC(=O)N[C@H]([C@@H](CO)OCCCc(n3)c12)c4ccccc4	IC50	=	3.443	1	MAP kinase ERK2	Sub-train	1	0.181475	0.818525	In
Cpd2785	CHEMBL3916619	CCn1ncc2cc3NC(=O)N[C@H](COC[C@H](O)Cc(n3)c12)c4ccccc4	IC50	=	3.535	1	MAP kinase ERK2	Sub-train	1	0.215176	0.784824	In
Cpd2786	CHEMBL4114932	COC[C@@H](NC(=O)Nc1cc2[nH]nc(N3CCN(C)CC3)c2cn1)c4ccccc4	IC50	=	21.83	1	MAP kinase ERK2	Sub-train	1	0.114113	0.885887	In
Cpd2787	CHEMBL4115191	CO[C@H](C)CNC(=O)Nc1cc2[nH]nc(N3CCOCC3)c2cn1	IC50	=	20.6	1	MAP kinase ERK2	Sub-train	1	0.430011	0.569989	In
Cpd2788	CHEMBL4114276	COC1CC(C1)[n+]2c[nH]c3cc(NC(=O)N[C@H](C)c4ccc(F)cc4)ncc23	IC50	=	8.69	1	MAP kinase ERK2	Sub-train	1	0.177029	0.822971	In
Cpd2789	CHEMBL3577631	COc1cccc(NC(=O)COc2ccc(\C=C\3/N=C(N(C3=O)c4cccc(OC)c4)c5ccccc5)cc2)c1	IC50	=	5.4	1	MAP kinase ERK2	Test	1	0.423473	0.576527	In
Cpd2790	CHEMBL3658760	Cc1cc(ccn1)c2n[nH]c3cc(NC(=O)NC4CC(=O)Nc5ccc(F)cc45)ncc23	IC50	=	8.465	1	MAP kinase ERK2	Sub-train	1	0.012318	0.987682	In
Cpd2791	CHEMBL4113288	CCNc1n[nH]c2cc(NC(=O)N[C@H](C)c3ccccc3)ncc12	IC50	=	11.7	1	MAP kinase ERK2	Sub-train	1	0.0542678	0.945732	In
Cpd2792	CHEMBL3940704	CCNc1n[nH]c2cc(NC(=O)NC3COc4ccccc4C3)ncc12	IC50	=	28	1	MAP kinase ERK2	Sub-train	1	0.0484537	0.951546	In
Cpd2794	CHEMBL3780985	CCNC(=O)Nc1nccc2nc(cnc12)c3ccccc3	IC50	>	100000	-1	MAP kinase ERK2	Sub-train	1	0.1318	0.8682	In
Cpd2795	CHEMBL3781538	C1CCN(CC1)c2ccc(cc2)c3cnc4c(Nc5ccccc5)cncc4n3	IC50	>	100000	-1	MAP kinase ERK2	Test	1	0.331675	0.668325	In
Cpd2796	CHEMBL3589655	OC(=O)c1nc2ccccc2c3[nH]c4ccc(cc4c13)C(F)(F)F	IC50	>	10000	-1	MAP kinase ERK2	Test	1	0.405949	0.594051	In
Cpd2797	CHEMBL3604849	Fc1cccc(CN2C=CC(=CC2=O)N3CCc4[nH]nc(c4C3)c5ccncc5)c1	IC50	=	0.5	1	MAP kinase ERK2	Sub-train	1	0.169731	0.830269	In
Cpd2798	CHEMBL3604844	Fc1ccc(cc1)c2n[nH]c3CCN(Cc23)C4=CC(=O)N(Cc5ccccc5)C=C4	IC50	=	11	1	MAP kinase ERK2	Sub-train	1	0.118677	0.881323	In
Cpd2799	CHEMBL3577643	COc1ccc(cc1)N2C(=O)\C(=C\c3ccc(OCC(=O)Nc4ccccc4Cl)cc3)\N=C2c5ccccc5	IC50	=	3.5	1	MAP kinase ERK2	Sub-train	1	0.290825	0.709175	In
Cpd2800	CHEMBL3577645	COc1ccc(cc1)N2C(=O)\C(=C\c3ccc(OCC(=O)Nc4ccc(Cl)cc4)cc3)\N=C2c5ccccc5	IC50	=	4.5	1	MAP kinase ERK2	Sub-train	1	0.286238	0.713762	In
Cpd2801	CHEMBL3658740	CC(NC(=O)Nc1cc2[nH]nc(c3ccnc(C)c3)c2cn1)c4ccc(cc4)S(=O)(=O)C	IC50	=	0.5815	1	MAP kinase ERK2	Sub-train	1	0.0589476	0.941052	In
Cpd2802	CHEMBL3658752	CN1CCC(O)(CNC(=O)Nc2cc3[nH]nc(c4ccnc(C)c4)c3cn2)CC1	IC50	=	6.66	1	MAP kinase ERK2	Sub-train	1	0.12697	0.87303	In
Cpd2803	CHEMBL3658830	Cc1cc(ccn1)c2n[nH]c3cc(NC(=O)NC4CCCOC4)ncc23	IC50	=	8.616	1	MAP kinase ERK2	Sub-train	1	0.0869364	0.913064	In
Cpd2806	CHEMBL4112219	CCNc1n[nH]c2cc(NC(=O)N[C@H](C)c3cccc(Cl)c3)ncc12	IC50	=	2.4	1	MAP kinase ERK2	Sub-train	1	0.0313117	0.968688	In
Cpd2807	CHEMBL4115591	CC[C@@H](NC(=O)Nc1cc2[nH]nc(N)c2cn1)c3ccc(Cl)cc3	IC50	=	2.6	1	MAP kinase ERK2	Test	1	0.0275334	0.972467	In
Cpd2808	CHEMBL4108137	C[C@@H](NC(=O)Nc1cc2[nH]nc(NC3CCNCC3)c2cn1)c4ccccc4	IC50	=	165	1	MAP kinase ERK2	Sub-train	1	0.0322202	0.96778	In
Cpd2809	CHEMBL4115602	C[C@@H](NC(=O)Nc1cc2[nH]nc(NCC3CCOCC3)c2cn1)c4ccccc4	IC50	=	1.7	1	MAP kinase ERK2	Sub-train	1	0.0319882	0.968012	In
Cpd2811	CHEMBL193	COC(=O)C1=C(C)NC(=C(C1c2ccccc2[N+](=O)[O-])C(=O)OC)C	IC50	=	Not Active	-1	MAP kinase ERK2	Sub-train	-1	0.993567	0.00643347	In
Cpd2812	CHEMBL3577641	COc1ccc(cc1)N2C(=O)\C(=C\c3ccc(OCC(=O)Nc4cccc(OC)c4)cc3)\N=C2c5ccccc5	IC50	=	21	1	MAP kinase ERK2	Test	1	0.405527	0.594473	In
Cpd2813	CHEMBL3945821	CCn1ncc2cc3NC(=O)N[C@@H]([C@H](CO)OCCCc(n3)c12)c4ccccc4	IC50	=	757.3	-1	MAP kinase ERK2	Sub-train	1	0.181475	0.818525	In
Cpd2814	CHEMBL3658727	Cc1cc(ccn1)c2n[nH]c3cc(NC(=O)N[C@@H](CO)c4cccc5cc[nH]c45)ncc23	IC50	=	25.94	1	MAP kinase ERK2	Sub-train	1	0.00661565	0.993384	In
Cpd2815	CHEMBL3962596	CS(=O)(=O)c1cccc(CNC(=O)c2ccc(cc2)c3nc(cnc3N)C4CCOCC4)c1	IC50	=	3.29	1	MAP kinase ERK2	Sub-train	1	0.158626	0.841374	In
Cpd2816	CHEMBL4106541	Nc1ncc(nc1c2ccc(cc2)C(=O)N[C@H](CF)c3ccccc3)C4CCOCC4	IC50	=	54.2	1	MAP kinase ERK2	Sub-train	1	0.0590247	0.940975	In
Cpd2817	CHEMBL4110125	COc1ccc(cc1C#N)[C@@H](NC(=O)c2ccc3cnc(NC4CCOCC4)nc3c2)c5cnn(C)c5	IC50	=	141	1	MAP kinase ERK2	Sub-train	1	0.122963	0.877037	In
Cpd2818	CHEMBL3608461	OC[C@@H](N1CCCn2cc(cc2C1=O)c3ccnc(N[C@H]4CC[C@@H](O)C4)n3)c5cccc(Cl)c5	IC50	=	0.19	1	MAP kinase ERK2	Sub-train	1	0.135411	0.864589	In
Cpd2822	CHEMBL3695649	CCNC(=O)Nc1ccc2ncc(Nc3ccnc(Cl)c3)nc2n1	IC50	>	100000	-1	MAP kinase ERK2	Sub-train	1	0.0801748	0.919825	In
Cpd2823	CHEMBL4109846	COC[C@@H](NC(=O)Nc1cc2[nH]nc(Nc3ccccc3C#N)c2cn1)c4ccccc4	IC50	=	2280	-1	MAP kinase ERK2	Sub-train	1	0.0431128	0.956887	In
Cpd2825	CHEMBL3658803	Cc1cc(ccn1)c2n[nH]c3cc(NC(=O)NCc4c(F)cccc4Cl)ncc23	IC50	=	0.4685	1	MAP kinase ERK2	Sub-train	1	0.0100659	0.989934	In
Cpd2828	CHEMBL3577634	COc1cccc(c1)N2C(=O)\C(=C\c3ccc(OCC(=O)Nc4cccc(Cl)c4)cc3)\N=C2c5ccccc5	IC50	=	3.4	1	MAP kinase ERK2	Test	1	0.304258	0.695742	In
Cpd2829	CHEMBL3577638	COc1ccc(cc1)N2C(=O)\C(=C\c3ccc(OCC(=O)Nc4cccc(C)c4)cc3)\N=C2c5ccccc5	IC50	=	78	1	MAP kinase ERK2	Sub-train	1	0.335842	0.664158	In
Cpd2830	CHEMBL3577639	COc1ccc(cc1)N2C(=O)\C(=C\c3ccc(OCC(=O)Nc4ccc(C)cc4)cc3)\N=C2c5ccccc5	IC50	=	43	1	MAP kinase ERK2	Sub-train	1	0.336654	0.663346	In
Cpd2831	CHEMBL3577640	COc1ccc(cc1)N2C(=O)\C(=C\c3ccc(OCC(=O)Nc4ccccc4OC)cc3)\N=C2c5ccccc5	IC50	=	89	1	MAP kinase ERK2	Sub-train	1	0.397691	0.602309	In
Cpd2840	CHEMBL3745885	CN1C(=O)C(=Cc2cnc(Nc3ccc4[nH]ccc4c3)nc12)S(=O)(=O)c5ccc(F)cc5F	IC50	>	10000	-1	MAP kinase ERK2	Test	-1	0.98954	0.0104596	In
Cpd2842	CHEMBL3654706	Cc1cc(ccn1)c2n[nH]c3cc(NC(=O)Nc4ccc(NCCc5ccccc5)nn4)ncc23	IC50	=	35.02	1	MAP kinase ERK2	Sub-train	1	0.0019726	0.998027	In
Cpd2843	CHEMBL3654696	Cc1cc(ccn1)c2n[nH]c3cc(NC(=O)NCc4ccc5ccccc5c4)ncc23	IC50	=	2.737	1	MAP kinase ERK2	Sub-train	1	0.00297691	0.997023	In
Cpd2848	CHEMBL3944658	Cc1cnccc1c2cnc(N)c(n2)c3ccc(cc3)C(=O)NCc4cccc(c4)S(=O)(=O)C	IC50	=	7.95	1	MAP kinase ERK2	Sub-train	1	0.0727792	0.927221	In
Cpd2849	CHEMBL4109608	Cc1oncc1c2cnc(N)c(c2)c3ccc(C(=O)N[C@H](CO)c4ccccc4)c(F)c3	IC50	=	0.634	1	MAP kinase ERK2	Sub-train	1	0.0194431	0.980557	In
Cpd2850	CHEMBL4106597	CS(=O)(=O)[C@@H]1CC[C@@H](CC1)c2cnc(N)c(n2)c3ccc(C(=O)NCc4ccccc4)c(F)c3	IC50	=	206	1	MAP kinase ERK2	Sub-train	1	0.387211	0.612789	In
Cpd2852	CHEMBL3654704	Cc1cc(ccn1)c2n[nH]c3cc(NC(=O)NCc4cccc(F)c4)ncc23	IC50	=	0.2452	1	MAP kinase ERK2	Sub-train	1	0.0139522	0.986048	In
Cpd2856	CHEMBL3654744	C[C@@H](NC(=O)Nc1cc2[nH]nc(c3cc[n+]([O-])cc3)c2cn1)c4ccccc4	IC50	=	0.383	1	MAP kinase ERK2	Sub-train	1	0.0276094	0.972391	In
Cpd2859	CHEMBL3658741	Cc1cc(ccn1)c2n[nH]c3cc(NC(=O)NCCc4nc5ccccc5[nH]4)ncc23	IC50	=	0.4776	1	MAP kinase ERK2	Sub-train	1	0.0123488	0.987651	In
Cpd2862	CHEMBL3658756	Cc1cc(ccn1)c2n[nH]c3cc(NC(=O)NCc4cn5c(C)cccc5n4)ncc23	IC50	=	22.56	1	MAP kinase ERK2	Sub-train	1	0.0158933	0.984107	In
Cpd2877	CHEMBL3654873	C[C@@H](NC(=O)Nc1cc2[nH]nc(c3ccc(cc3)n4nccn4)c2cn1)c5ccc(F)cc5	IC50	=	45.03	1	MAP kinase ERK2	Sub-train	1	0.00927313	0.990727	In
Cpd2879	CHEMBL3658719	Cc1cc(ccn1)c2n[nH]c3cc(NC(=O)NC4(CCC4)c5ccccn5)ncc23	IC50	=	1.537	1	MAP kinase ERK2	Sub-train	1	0.0138558	0.986144	In
Cpd2893	CHEMBL3818247	CN1C(=O)COc2c1cnc3ccc(Sc4nnc5c(F)cc(cn45)c6cnn(C)c6)cc23	IC50	>	30000	-1	MAP kinase ERK2	Sub-train	-1	0.590774	0.409226	In
Cpd2899	CHEMBL4111205	COCCS(=O)(=O)Nc1n[nH]c2cc(NC(=O)N[C@H](C)c3ccccc3)ncc12	IC50	=	810	-1	MAP kinase ERK2	Sub-train	-1	0.982206	0.0177936	In
Cpd2900	CHEMBL4114229	C[C@@H](NC(=O)Nc1cc2[nH]nc(NS(=O)(=O)C3CNC3)c2cn1)c4ccccc4	IC50	=	191.1	1	MAP kinase ERK2	Sub-train	-1	0.959703	0.0402975	In
Cpd2902	CHEMBL2	COc1cc2nc(nc(N)c2cc1OC)N3CCN(CC3)C(=O)c4occc4	IC50	=	Not Active	-1	MAP kinase ERK2	Sub-train	-1	0.708761	0.291239	In
Cpd2909	CHEMBL4112362	COc1n[nH]c2cc(NC(=O)N[C@H](C)c3ccccc3)nc(c4ccnn4C)c12	IC50	=	23.7	1	MAP kinase ERK2	Sub-train	1	0.223147	0.776853	In
Cpd2916	CHEMBL3658821	Cc1cc(ccn1)c2n[nH]c3cc(NC(=O)NCC4COc5ccccc5O4)ncc23	IC50	=	2.74	1	MAP kinase ERK2	Sub-train	1	0.0147433	0.985257	In
Cpd2919	CHEMBL3663034	Cc1cc(ccn1)c2n[nH]c3cc(NC(=O)N[C@@H]4COC[C@H]4c5ccccc5)ncc23	IC50	=	0.1934	1	MAP kinase ERK2	Sub-train	1	0.0100208	0.989979	In
Cpd2922	CHEMBL3658768	CCC(C)C(NC(=O)Nc1cc2[nH]nc(c3ccnc(C)c3)c2cn1)c4ccc(Cl)cc4	IC50	=	11.07	1	MAP kinase ERK2	Sub-train	1	0.00788632	0.992114	In
Cpd2923	CHEMBL3931013	Cn1cc(cn1)c2cnc(N)c(c2)c3ccc(C(=O)N[C@@H]4C[C@H]4c5ccccc5)c(F)c3	IC50	=	99.2	1	MAP kinase ERK2	Sub-train	1	0.0630793	0.936921	In
Cpd2924	CHEMBL3935720	Nc1ncc(CC#N)cc1c2ccc(C(=O)N[C@H](CO)c3ccccc3)c(F)c2	IC50	=	202	1	MAP kinase ERK2	Sub-train	1	0.176089	0.823911	In
Cpd2925	CHEMBL3905175	Cc1c(cnn1C)c2cnc(N)c(c2)c3ccc(C(=O)N[C@H](CO)c4cccc(Cl)c4)c(F)c3	IC50	=	0.115	1	MAP kinase ERK2	Sub-train	1	0.0319721	0.968028	In
Cpd2926	CHEMBL4113158	Cc1onc(C)c1c2cnc(N)c(n2)c3ccc(C(=O)N[C@H](CO)c4ccccc4)c(F)c3	IC50	=	3.32	1	MAP kinase ERK2	Sub-train	1	0.0257125	0.974287	In
Cpd2927	CHEMBL4112276	Cn1cc(c2cnc(N)c(c2)c3ccc(C(=O)N[C@H](CO)c4ccccc4)c(F)c3)c(n1)C(F)(F)F	IC50	=	5.13	1	MAP kinase ERK2	Sub-train	1	0.0587189	0.941281	In
Cpd2936	CHEMBL3695618	CNC(=S)Nc1ccc2ncc(nc2n1)c3ccc(N)cc3	IC50	=	2500	-1	MAP kinase ERK2	Test	-1	0.610332	0.389668	In
Cpd2939	CHEMBL514	ClCCN(N=O)C(=O)NC1CCCCC1	IC50	=	Not Active	-1	MAP kinase ERK2	Sub-train	-1	0.946683	0.0533174	In
Cpd2940	CHEMBL3658772	Cc1cc(ccn1)c2n[nH]c3cc(NC(=O)NCc4nc5ccccc5[nH]4)ncc23	IC50	=	1.999	1	MAP kinase ERK2	Sub-train	1	0.0106113	0.989389	In
Cpd2942	CHEMBL3662960	Cc1cc(ccn1)c2n[nH]c3cc(NC(=O)NC4CCc5nc(N)sc5C4)ncc23	IC50	=	1.356	1	MAP kinase ERK2	Test	1	0.0783755	0.921625	In
Cpd2950	CHEMBL379849	Fc1ccccc1\C=C\2/CNC\C(=C/c3ccccc3F)\C2=O	IC50	=	13000	-1	MAP kinase ERK2	Sub-train	-1	0.83205	0.16795	In
Cpd2951	CHEMBL262777	CN[C@H](CC(C)C)C(=O)N[C@@H]1[C@H](O)c2ccc(Oc3cc4cc(Oc5ccc(cc5Cl)[C@@H](O)[C@@H]6NC(=O)[C@H](NC(=O)[C@@H]4NC(=O)[C@H](CC(=O)N)NC1=O)c7ccc(O)c(c7)c8c(O)cc(O)cc8[C@H](NC6=O)C(=O)O)c3O[C@@H]9O[C@H](CO)[C@@H](O)[C@H](O)[C@H]9O[C@H]%10C[C@](C)(N)[C@H](O)[C@H](C)O%10)c(Cl)c2	IC50	=	Not Active	-1	MAP kinase ERK2	Sub-train	1	0.0557558	0.944244	Outlier
Cpd2952	CHEMBL3787614	Nc1ncnc2c1c(cn2[C@@H]3C[C@H](CN4CCC4)C3)c5cccc(OC[C@@H]6CCCO6)c5	IC50	>	10000	-1	MAP kinase ERK2	Test	-1	0.810841	0.189159	In
Cpd2967	CHEMBL3658641	Cc1cc(ccn1)c2n[nH]c3cc(NC(=O)NC4CC(C)(C)Oc5ccccc45)ncc23	IC50	=	5.934	1	MAP kinase ERK2	Sub-train	1	0.0101061	0.989894	In
Cpd2968	CHEMBL3658655	Cc1cc(ccn1)c2n[nH]c3cc(NC(=O)NC4CCOc5cc(F)ccc45)ncc23	IC50	=	9.589	1	MAP kinase ERK2	Sub-train	1	0.0109608	0.989039	In
Cpd2969	CHEMBL3662976	Cc1cc(ccn1)c2n[nH]c3cc(NC(=O)NCc4ccc(Cl)cc4F)ncc23	IC50	=	3.306	1	MAP kinase ERK2	Sub-train	1	0.00944108	0.990559	In
Cpd2971	CHEMBL3662985	Cc1cc(ccn1)c2n[nH]c3cc(NC(=O)NC4C(O)C(C)(C)Oc5ccccc45)ncc23	IC50	=	53.45	1	MAP kinase ERK2	Sub-train	1	0.0119521	0.988048	In
Cpd2972	CHEMBL3662987	Cc1cc(ccn1)c2n[nH]c3cc(NC(=O)NC4CCOc5ccccc45)ncc23	IC50	=	3.521	1	MAP kinase ERK2	Sub-train	1	0.0109855	0.989015	In
Cpd2975	CHEMBL3658704	Cc1cc(ccn1)c2n[nH]c3cc(NC(=O)Nc4noc5ccccc45)ncc23	IC50	=	1.403	1	MAP kinase ERK2	Sub-train	1	0.0174108	0.982589	In
Cpd2985	CHEMBL4111305	Nc1ncc(nc1c2ccc(C(=O)N[C@H](CO)c3cc(F)cc(I)c3)c(F)c2)[C@@H]4CC[C@H](O)[C@H](O)C4	IC50	=	0.135	1	MAP kinase ERK2	Sub-train	1	0.053996	0.946004	In
Cpd2986	CHEMBL3923033	NC[C@@H](NC(=O)c1ccc(cc1F)c2nc(cnc2N)C3CCOCC3)c4cc(F)cc(Cl)c4	IC50	=	0.0119	1	MAP kinase ERK2	Test	1	0.0373725	0.962627	In
Cpd2987	CHEMBL3900490	Nc1ncc(nc1c2ccc(C(=O)N[C@H](CO)c3cc(F)cc(Br)c3)c(F)c2)[C@H]4CC[C@H](O)[C@@H](F)C4	IC50	=	0.051	1	MAP kinase ERK2	Sub-train	1	0.012114	0.987886	In
Cpd2988	CHEMBL3946329	Nc1ncc(nc1c2ccc(C(=O)N[C@H](CO)c3cc(F)cc(Br)c3)c(F)c2)[C@@H]4CC[C@@H](O)[C@@H](F)C4	IC50	=	0.0363	1	MAP kinase ERK2	Sub-train	1	0.012114	0.987886	In
Cpd2989	CHEMBL4108076	Nc1ncc(nc1c2ccc(C(=O)N[C@H](CO)c3cc(F)cc(Br)c3)c(F)c2)C4CCOCC4	IC50	=	0.0127	1	MAP kinase ERK2	Sub-train	1	0.0263632	0.973637	In
Cpd2990	CHEMBL4109206	Cc1c(cnn1C(F)F)c2cnc(N)c(c2)c3ccc(C(=O)N[C@H](CO)c4cc(F)cc(CF)c4)c(F)c3	IC50	=	0.014	1	MAP kinase ERK2	Sub-train	1	0.0278251	0.972175	In
Cpd2991	CHEMBL4110468	CNC[C@@H](NC(=O)c1ccc(cc1F)c2nc(cnc2N)C3CCOCC3)c4cc(F)cc(Br)c4	IC50	=	0.0208	1	MAP kinase ERK2	Sub-train	1	0.0487475	0.951252	In
Cpd2993	CHEMBL3905189	Nc1ncc(cc1c2ccc(cc2)C(=O)NCc3ccccc3Cl)C4CCOCC4	IC50	=	266	1	MAP kinase ERK2	Sub-train	1	0.0435046	0.956495	In
Cpd3005	CHEMBL4108693	Nc1ncc(nc1c2ccc(C(=O)N[C@H](CO)c3cc(F)cc(Br)c3)c(F)c2)[C@@H]4CC[C@H](O)[C@H](O)C4	IC50	=	0.251	1	MAP kinase ERK2	Sub-train	1	0.014342	0.985658	In
Cpd3008	CHEMBL4108667	Nc1ncc(cc1c2ccc(C(=O)N[C@H](CO)c3cc(F)cc(Br)c3)c(F)c2)C(=O)N4CCOCC4	IC50	=	1.56	1	MAP kinase ERK2	Sub-train	1	0.0369023	0.963098	In
Cpd3009	CHEMBL4107592	CNC[C@@H](NC(=O)c1ccc(cc1F)c2nc(cnc2N)[C@@H]3CC[C@@H](O)CC3)c4cc(F)cc(I)c4	IC50	=	0.00665	1	MAP kinase ERK2	Sub-train	1	0.101844	0.898156	In
Cpd3015	CHEMBL4114358	CS(=O)(=O)c1cccc(c1)[C@@H](CO)NC(=O)c2ccc(cc2F)c3nc(cnc3N)C4CCOCC4	IC50	=	0.129	1	MAP kinase ERK2	Sub-train	1	0.146994	0.853006	In
Cpd3030	CHEMBL278172	CCOC(=O)c1ccc(N)cc1	IC50	=	Not Active	-1	MAP kinase ERK2	Sub-train	-1	0.914637	0.0853628	In
Cpd3031	CHEMBL695	CN1C(=O)OC(C)(C)C1=O	IC50	=	Not Active	-1	MAP kinase ERK2	Test	-1	0.982768	0.0172322	In
Cpd3032	CHEMBL1431	CN(C)C(=N)NC(=N)N	IC50	=	Not Active	-1	MAP kinase ERK2	Sub-train	-1	0.999817	0.00018296	In
Cpd3042	CHEMBL3938607	Nc1ncc(cc1c2ccc(C(=O)NCc3ccccc3)c(F)c2)C4CCS(=O)(=O)C4	IC50	=	315	1	MAP kinase ERK2	Test	1	0.232951	0.767049	In
Cpd3049	CHEMBL116	CC(C)CN(C[C@@H](O)[C@H](Cc1ccccc1)NC(=O)O[C@H]2CCOC2)S(=O)(=O)c3ccc(N)cc3	IC50	=	Not Active	-1	MAP kinase ERK2	Sub-train	-1	0.996327	0.00367277	In
Cpd3050	CHEMBL47	CC(C)CCC[C@@H](C)CCC[C@@H](C)CCC[C@]1(C)CCc2c(C)c(O)c(C)c(C)c2O1	IC50	=	Not Active	-1	MAP kinase ERK2	Test	-1	0.988471	0.0115285	In
Cpd3051	CHEMBL649	CC(C)(C)NCC(O)COc1cccc2C[C@@H](O)[C@@H](O)Cc12	IC50	=	Not Active	-1	MAP kinase ERK2	Sub-train	-1	0.990231	0.0097691	In
Cpd3058	CHEMBL1237044	COc1cccc(c1)C2(O)CCCCC2CN(C)C	IC50	=	Not Active	-1	MAP kinase ERK2	Sub-train	-1	0.997787	0.00221307	In
Cpd3059	CHEMBL1162	C[C@]12CC[C@H]3[C@@H](CCC4=CC(=O)CC[C@H]34)[C@@H]1CC[C@@]2(O)C#C	IC50	=	Not Active	-1	MAP kinase ERK2	Test	-1	0.926628	0.0733719	In
Cpd3062	CHEMBL1144	CC[C@H](C)C(=O)O[C@H]1C[C@H](O)C=C2C=C[C@H](C)[C@H](CC[C@@H](O)C[C@@H](O)CC(=O)O)[C@@H]12	IC50	=	Not Active	-1	MAP kinase ERK2	Sub-train	-1	0.996044	0.00395589	In
Cpd3063	CHEMBL153062	CCCCCCCCCc1ccc(O)cc1	IC50	=	Not Active	-1	MAP kinase ERK2	Sub-train	-1	0.978582	0.0214177	In
Cpd3090	CHEMBL4108056	NC[C@@H](NC(=O)c1ccc(cc1F)c2nc(cnc2N)[C@@H]3CC[C@@H](O)CC3)c4cc(F)cc(I)c4	IC50	=	0.00837	1	MAP kinase ERK2	Sub-train	1	0.0715136	0.928486	In
Cpd3093	CHEMBL3962565	COC(C)(C)C(NC(=O)Nc1cc2[nH]nc(N3C[C@@H](C)O[C@@H](C)C3)c2cn1)c4ccc(F)cc4	IC50	=	2.4	1	MAP kinase ERK2	Test	1	0.0533147	0.946685	In
Cpd3095	CHEMBL3695629	CCNC(=O)Nc1ccc2ncc(Nc3ccc(OC)cc3)nc2n1	IC50	>	100000	-1	MAP kinase ERK2	Sub-train	1	0.0881925	0.911807	In
Cpd3097	CHEMBL3695627	CCNC(=O)Nc1ccc2ncc(nc2n1)c3ccc(N)c(OC)c3	IC50	=	592	-1	MAP kinase ERK2	Sub-train	1	0.0836501	0.91635	In
Cpd3100	CHEMBL4109835	FC(F)OC[C@@H](NC(=O)Nc1cc2[nH]nc(N3CCOCC3)c2cn1)c4ccccc4	IC50	=	0.4	1	MAP kinase ERK2	Sub-train	1	0.028783	0.971217	In
Cpd3102	CHEMBL3937700	COc1ccc(cc1F)[C@H](NC(=O)c2ccc3cnc(N[C@@H]4C[C@@H](O)C4)nc3c2)c5cnn(C)c5	IC50	=	3.8	1	MAP kinase ERK2	Sub-train	1	0.0841029	0.915897	In
Cpd3103	CHEMBL3907613	CNC(=O)c1ccc(cc1F)c2nc(cnc2N)C3CCOCC3	IC50	=	354	1	MAP kinase ERK2	Sub-train	1	0.452049	0.547951	In
Cpd3107	CHEMBL1909050	Cc1ccccc1C(=O)N2CCC(Cc3ccccc3)CC2	IC50	=	Not Active	-1	MAP kinase ERK2	Sub-train	-1	0.637455	0.362545	In
Cpd3113	CHEMBL2103747	CCN1C[C@]2(COC)[C@H](O)C[C@@H](OC)[C@@]34[C@@H]5C[C@]6(O)[C@@H](OC)[C@H](O)[C@](OC(=O)C)([C@@H]([C@H](OC)[C@H]23)[C@@H]14)[C@H]5[C@H]6OC(=O)c7ccccc7	IC50	=	Not Active	-1	MAP kinase ERK2	Sub-train	-1	0.999882	0.00011838	Outlier
Cpd3117	CHEMBL4115557	COc1n[nH]c2cc(NC(=O)N[C@H](CO)c3ccccc3)ncc12	IC50	=	8.16	1	MAP kinase ERK2	Sub-train	1	0.0499035	0.950096	In
Cpd3118	CHEMBL4109490	C[C@@H](NC(=O)Nc1cc2[nH]nc(OC(F)F)c2cn1)c3ccccc3	IC50	=	24.1	1	MAP kinase ERK2	Sub-train	1	0.0360793	0.963921	In
Cpd3119	CHEMBL4108271	CCOc1n[nH]c2cc(NC(=O)N[C@H](COC)c3ccc(F)cc3)ncc12	IC50	=	1.64	1	MAP kinase ERK2	Sub-train	1	0.0558515	0.944148	In
Cpd3120	CHEMBL3955580	COC[C@H](NC(=O)Nc1cc2[nH]nc(OC)c2cn1)c3ccccn3	IC50	=	3000	-1	MAP kinase ERK2	Test	1	0.105092	0.894908	In
Cpd3121	CHEMBL4110811	COCCSc1n[nH]c2cc(NC(=O)N[C@H](C)c3ccccc3)ncc12	IC50	=	63.13	1	MAP kinase ERK2	Sub-train	1	0.153458	0.846542	In
Cpd3122	CHEMBL4110874	COc1n[nH]c2cc(NC(=O)N[C@@H]([C@H](O)CO)c3ccccc3)ncc12	IC50	=	1254	-1	MAP kinase ERK2	Sub-train	1	0.0543039	0.945696	In
Cpd3123	CHEMBL685	COC(=O)Nc1nc2ccc(cc2[nH]1)C(=O)c3ccccc3	IC50	=	Not Active	-1	MAP kinase ERK2	Sub-train	1	0.40829	0.59171	In
Cpd3124	CHEMBL3895631	COc1n[nH]c2cc(NC(=O)N[C@@H]3CN(C)C[C@H]3c4ccccc4C(F)(F)F)ncc12	IC50	=	8.16	1	MAP kinase ERK2	Test	1	0.137799	0.862201	In
Cpd3126	CHEMBL897	CCCN(CCC)S(=O)(=O)c1ccc(cc1)C(=O)O	IC50	=	Not Active	-1	MAP kinase ERK2	Test	-1	0.998221	0.00177888	In
Cpd3129	CHEMBL4106909	Cn1nncc1c2cnc(N)c(c2)c3ccc(C(=O)N[C@H](CO)c4cc(F)cc(I)c4)c(F)c3	IC50	=	0.0158	1	MAP kinase ERK2	Sub-train	1	0.0357036	0.964296	In
Cpd3132	CHEMBL4109456	NC[C@@H](NC(=O)c1ccc(cc1F)c2nc(cnc2N)[C@@H]3CC[C@@H](O)CC3)c4cccc(I)c4	IC50	=	0.011	1	MAP kinase ERK2	Sub-train	1	0.0694866	0.930513	In
Cpd3133	CHEMBL4112411	Nc1ncc(nc1c2ccc(C(=O)N[C@H](CO)c3cc(F)cc(I)c3)c(F)c2)[C@@H]4CC[C@H](O)CC4	IC50	=	0.0956	1	MAP kinase ERK2	Test	1	0.0658563	0.934144	In
Cpd3135	CHEMBL3899872	COC(=O)NC1CCC(CC1)c2cnc(N)c(n2)c3ccc(C(=O)N[C@H](CO)c4cccc(Cl)c4)c(F)c3	IC50	=	0.282	1	MAP kinase ERK2	Sub-train	1	0.0614478	0.938552	Outlier
Cpd3141	CHEMBL3628254	Fc1ccc(cc1)c2cnc3[nH]ccc3n2	IC50	=	29700	-1	MAP kinase ERK2	Test	-1	0.901488	0.0985124	In
Cpd3142	CHEMBL3628367	c1cc(ccn1)c2cnc3[nH]cc(c4cncnc4)c3n2	IC50	=	2200	-1	MAP kinase ERK2	Sub-train	-1	0.844011	0.155989	In
Cpd3143	CHEMBL3628368	c1cncc(c1)c2c[nH]c3ncc(nc23)c4cn[nH]c4	IC50	=	280	1	MAP kinase ERK2	Sub-train	-1	0.831271	0.168729	In
Cpd3144	CHEMBL3671126	OCCOCCOc1ccc(cc1)c2cnc3ccc(NC(=O)NCCCCc4ccccc4)nc3n2	IC50	=	39	1	MAP kinase ERK2	Test	1	0.00364904	0.996351	In
Cpd3145	CHEMBL531	CCCN1C[C@H](CSC)C[C@H]2[C@H]1Cc3c[nH]c4cccc2c34	IC50	=	Not Active	-1	MAP kinase ERK2	Sub-train	-1	0.993461	0.00653862	In
Cpd3149	CHEMBL3671103	OP(=O)(O)Oc1ccc(cc1)c2cnc3ccc(NC(=O)NCCCCc4ccccc4)nc3n2	IC50	=	3	1	MAP kinase ERK2	Sub-train	1	9.71079e-05	0.999903	Outlier
Cpd3150	CHEMBL3671110	O=C(NCCCCc1ccccc1)Nc2ccc3ncc(nc3n2)N4CCCC4	IC50	=	5	1	MAP kinase ERK2	Sub-train	1	0.0305861	0.969414	In
Cpd3157	CHEMBL1237	NCCCC[C@H](N[C@@H](CCc1ccccc1)C(=O)O)C(=O)N2CCC[C@H]2C(=O)O	IC50	=	Not Active	-1	MAP kinase ERK2	Sub-train	-1	0.972342	0.0276581	In
Cpd3160	CHEMBL959	CC(N)C12CC3CC(CC(C3)C1)C2	IC50	=	Not Active	-1	MAP kinase ERK2	Sub-train	-1	0.999272	0.000728045	In
Cpd3165	CHEMBL3752989	CC[C@H](C)[C@H](NC(=O)[C@H](Cc1ccc(O)cc1)NC(=O)[C@H](CCCCN)NC(=O)[C@@H](N)CCCCN)C(=O)N[C@@H](CC(C)C)C(=O)N[C@@H](C)C(=O)N[C@@H](CC(C)C)C(=O)O	IC50	=	9800	-1	MAP kinase ERK2	Sub-train	-1	0.973788	0.0262117	In
Cpd3166	CHEMBL1009	N[C@@H](Cc1ccc(O)c(O)c1)C(=O)O	IC50	=	Not Active	-1	MAP kinase ERK2	Sub-train	-1	0.962198	0.0378019	In
Cpd3168	CHEMBL679	CNC[C@H](O)c1ccc(O)c(O)c1	IC50	=	Not Active	-1	MAP kinase ERK2	Sub-train	-1	0.998406	0.00159437	In
Cpd3170	CHEMBL3680610	COC(=O)c1cc(Nc2nccc(n2)C3=CC(=O)N(C=C3)[C@H](CO)c4ccc(Cl)c(F)c4)ccn1	IC50	=	2.2	1	MAP kinase ERK2	Sub-train	1	0.0819422	0.918058	In
Cpd3171	CHEMBL4111705	C[C@@H](NC(=O)Nc1cc2[nH]nc(N[C@H]3CCOC3)c2cn1)c4ccccc4	IC50	=	2.1	1	MAP kinase ERK2	Sub-train	1	0.0346106	0.965389	In
Cpd3172	CHEMBL4113004	C[C@@H](NC(=O)Nc1cc2[nH]nc(N[C@@H]3COC[C@@H]3F)c2cn1)c4ccccc4	IC50	=	4.4	1	MAP kinase ERK2	Sub-train	1	0.0232803	0.97672	In
Cpd3173	CHEMBL3658786	Cc1cc(ccn1)c2n[nH]c3cc(NC(=O)NCc4cnsc4)ncc23	IC50	=	0.594	1	MAP kinase ERK2	Sub-train	1	0.0237886	0.976211	In
Cpd3174	CHEMBL3658796	Cc1cc(ccn1)c2n[nH]c3cc(NC(=O)NCc4occn4)ncc23	IC50	=	2.973	1	MAP kinase ERK2	Sub-train	1	0.0693868	0.930613	In
Cpd3175	CHEMBL4111938	C[C@@H](O)[C@@H](NC(=O)Nc1cc2[nH]nc(N3CCOCC3)c2cn1)c4ccccc4	IC50	=	0.4	1	MAP kinase ERK2	Sub-train	1	0.058542	0.941458	In
Cpd3177	CHEMBL3658802	Cc1cc(ccn1)c2n[nH]c3cc(NC(=O)NCc4ccccc4Cl)ncc23	IC50	=	1.296	1	MAP kinase ERK2	Test	1	0.00927161	0.990728	In
Cpd3178	CHEMBL1095699	N[C@@H](COC(=O)C=[N+]=[N-])C(=O)O	IC50	=	Not Active	-1	MAP kinase ERK2	Test	-1	0.998731	0.00126893	In
Cpd3179	CHEMBL4114286	COC[C@@H](NC(=O)Nc1cc2[nH]nc(OC)c2c(CO)n1)c3ccc(F)cc3	IC50	=	9.3	1	MAP kinase ERK2	Test	1	0.111888	0.888112	In
Cpd3181	CHEMBL4107411	COC1CCN(CC1)c2n[nH]c3cc(NC(=O)N[C@H](C)c4ccccc4)ncc23	IC50	=	4.5	1	MAP kinase ERK2	Sub-train	1	0.081182	0.918818	In
Cpd3182	CHEMBL1400945	CC(=O)[C@H]1[C@@H](C[C@H]2[C@@H]3CC=C4C[C@@H](O)CC[C@]4(C)[C@H]3CC[C@]12C)C#N	IC50	=	Not Active	-1	MAP kinase ERK2	Sub-train	-1	0.976964	0.0230362	In
Cpd3183	CHEMBL787	CC(C)(O)c1ccccc1CC[C@@H](SCC2(CC(=O)O)CC2)c3cccc(\C=C\c4ccc5ccc(Cl)cc5n4)c3	IC50	=	Not Active	-1	MAP kinase ERK2	Sub-train	1	0.0338979	0.966102	In
Cpd3184	CHEMBL20	CC(=O)Nc1nnc(s1)S(=O)(=O)N	IC50	=	Not Active	-1	MAP kinase ERK2	Test	-1	0.999629	0.000371011	In
Cpd3185	CHEMBL14	[Cl-].C[N+](C)(C)CCOC(=O)N	IC50	=	Not Active	-1	MAP kinase ERK2	Sub-train	-1	0.999754	0.000246373	Outlier
Cpd3186	CHEMBL3958621	CCOc1ncccc1CNC(=O)Nc2cc3[nH]nc(N)c3cn2	IC50	=	20.7	1	MAP kinase ERK2	Sub-train	1	0.0409706	0.959029	In
Cpd3188	CHEMBL3663014	C[C@@H](NC(=O)Nc1cc2[nH]nc(CC#N)c2cn1)c3ccccc3	IC50	=	14.47	1	MAP kinase ERK2	Sub-train	1	0.0946943	0.905306	In
Cpd3189	CHEMBL3911810	CN(C)c1ncccc1CNC(=O)Nc2cc3[nH]nc(N)c3cn2	IC50	=	32.4	1	MAP kinase ERK2	Sub-train	1	0.0965362	0.903464	In
Cpd3190	CHEMBL415324	COc1ccc(\C=C\C(=O)Nc2ccccc2C(=O)O)cc1OC	IC50	=	Not Active	-1	MAP kinase ERK2	Test	-1	0.678695	0.321305	In
Cpd3191	CHEMBL36994	COc1ccc(cc1)C(=O)N2CCCC2=O	IC50	=	Not Active	-1	MAP kinase ERK2	Sub-train	-1	0.990197	0.00980311	In
Cpd3193	CHEMBL3904955	CCOc1n[nH]c2cc(NC(=O)N[C@@H](c3ccccc3)C(C)(C)O)nc(C(F)F)c12	IC50	=	0.8	1	MAP kinase ERK2	Sub-train	1	0.0862945	0.913706	In
Cpd3194	CHEMBL192	CCCc1nn(C)c2C(=O)NC(=Nc12)c3cc(ccc3OCC)S(=O)(=O)N4CCN(C)CC4	IC50	=	Not Active	-1	MAP kinase ERK2	Sub-train	-1	0.994523	0.00547693	In
Cpd3195	CHEMBL4113899	COc1n[nH]c2cc(NC(=O)N[C@H](C)c3ccccc3)nc(Cn4ccnn4)c12	IC50	=	8.4	1	MAP kinase ERK2	Sub-train	1	0.0731866	0.926813	In
Cpd3196	CHEMBL4110942	COc1n[nH]c2cc(NC(=O)N[C@H](C)c3ccccc3)nc(Cn4ccnc4)c12	IC50	=	9.6	1	MAP kinase ERK2	Sub-train	1	0.0845884	0.915412	In
Cpd3197	CHEMBL4112910	COCCOc1n[nH]c2cc(NC(=O)N[C@H](C)c3ccccc3)nc([C@H](C)O)c12	IC50	=	0.8	1	MAP kinase ERK2	Test	1	0.154128	0.845872	In
Cpd3198	CHEMBL4109208	COCc1nc(NC(=O)N[C@H](C)c2ccc(F)cc2)cc3[nH]nc(OC)c13	IC50	=	11.4	1	MAP kinase ERK2	Sub-train	1	0.15976	0.84024	In
Cpd3199	CHEMBL4110859	COC[C@@H](NC(=O)Nc1cc2[nH]nc(OC)c2c(COC)n1)c3ccccc3	IC50	=	15	1	MAP kinase ERK2	Sub-train	1	0.196283	0.803717	In
Cpd3200	CHEMBL4114279	CCOc1n[nH]c2cc(NC(=O)N[C@H]([C@@H](C)O)c3ccc(F)cc3)ncc12	IC50	=	0.6	1	MAP kinase ERK2	Sub-train	1	0.0404857	0.959514	In
Cpd3201	CHEMBL3924896	CC(C)(O)[C@@H](NC(=O)Nc1cc2[nH]nc(OC[C@H](O)C(F)(F)F)c2cn1)c3ccccc3	IC50	=	0.7	1	MAP kinase ERK2	Sub-train	1	0.0604068	0.939593	In
Cpd3202	CHEMBL4106528	Cc1cccc(c1)[C@@H](CO)NC(=O)c2ccc(cc2F)c3cc(cnc3N)c4cnnn4C	IC50	=	0.378	1	MAP kinase ERK2	Test	1	0.016948	0.983052	In
Cpd3203	CHEMBL588119	CCCCCCCCN[C@H](C)[C@@H](O)c1ccc(SC(C)C)cc1	IC50	=	Not Active	-1	MAP kinase ERK2	Sub-train	-1	0.993388	0.00661156	In
Cpd3204	CHEMBL3924859	CS(=O)(=O)c1cc(Cl)cc(CNC(=O)c2ccc(cc2F)c3nc(cnc3N)C4CCOCC4)c1	IC50	=	1.19	1	MAP kinase ERK2	Sub-train	1	0.206001	0.793999	In
Cpd3205	CHEMBL3970217	CNC[C@@H](NC(=O)c1ccc(cc1F)c2nc(cnc2N)[C@H]3CC[C@H](O)[C@H](F)C3)c4cc(F)cc(Br)c4	IC50	=	0.0317	1	MAP kinase ERK2	Sub-train	1	0.0224828	0.977517	In
Cpd3206	CHEMBL4107711	C[C@@H](NC(=O)c1ccc(cc1F)c2nc(cnc2N)[C@@H]3CC[C@H](O)CC3)c4cccc(Cl)c4	IC50	=	5.68	1	MAP kinase ERK2	Sub-train	1	0.0306006	0.969399	In
Cpd3207	CHEMBL4106511	Nc1ncc(nc1c2ccc(C(=O)N[C@H](CO)c3cccc(Cl)c3)c(F)c2)C4CCCCC4	IC50	=	0.187	1	MAP kinase ERK2	Sub-train	1	0.0310798	0.96892	In
Cpd3209	CHEMBL3916940	COC[C@H](NC(=O)Nc1cc2[nH]nc(N3CCOCC3)c2cn1)c4ccc(F)cc4	IC50	=	0.4	1	MAP kinase ERK2	Sub-train	1	0.082957	0.917043	In
Cpd3210	CHEMBL4108919	CC(C)Nc1n[nH]c2cc(NC(=O)N[C@H](C)c3ccc(F)cc3)ncc12	IC50	=	1.6	1	MAP kinase ERK2	Sub-train	1	0.0585249	0.941475	In
Cpd3211	CHEMBL4110964	C[C@@H](NC(=O)Nc1cc2[nH]nc(NC(=O)N[C@H](C)c3ccc(Cl)c(c3)C(F)(F)F)c2cn1)c4ccc(Cl)c(c4)C(F)(F)F	IC50	=	2454	-1	MAP kinase ERK2	Sub-train	1	0.00177284	0.998227	In
Cpd3212	CHEMBL1489254	CC(=O)OCC(COC(=O)C)OC(=O)C	IC50	=	Not Active	-1	MAP kinase ERK2	Sub-train	-1	0.996322	0.00367797	In
Cpd3214	CHEMBL19236	COc1nc(C)nc(Cl)c1NC2=NCCN2	IC50	=	Not Active	-1	MAP kinase ERK2	Sub-train	-1	0.974547	0.0254531	In
Cpd3215	CHEMBL1201117	COc1ccccc1OCC(O)COC(=O)N	IC50	=	Not Active	-1	MAP kinase ERK2	Sub-train	-1	0.978339	0.0216613	Outlier
Cpd3216	CHEMBL273348	NC1CCN(C1)c2nc3N(C=C(C(=O)O)C(=O)c3cc2F)c4ccc(F)cc4F	IC50	=	Not Active	-1	MAP kinase ERK2	Sub-train	-1	0.892739	0.107261	In
Cpd3217	CHEMBL1201356	CC[C@@H](CO)NC(=O)[C@H]1CN(C)[C@@H]2Cc3c[nH]c4cccc(C2=C1)c34	IC50	=	Not Active	-1	MAP kinase ERK2	Sub-train	-1	0.979318	0.0206818	In
Cpd3218	CHEMBL4075917	Cc1n[nH]c2ccc(cc12)c3cc(N[C@@H](CO)c4ccccc4)cnc3c5ccc(F)cc5O	IC50	>	1000	-1	MAP kinase ERK2	Sub-train	1	0.318776	0.681224	In
Cpd3219	CHEMBL2178352	CN1CCN(CC1)c2ccc(Nc3ncc4nc(Nc5ccccc5)n(C6CCCC6)c4n3)cc2	IC50	>	10000	-1	MAP kinase ERK2	Test	1	0.359659	0.640341	In
Cpd3220	CHEMBL2333365	Cc1c(F)c(ccc1C(=O)N2CCOc3ccc(cc3C2)c4ccc(N)nc4)S(=O)(=O)C	IC50	>	10000	-1	MAP kinase ERK2	Test	1	0.189076	0.810924	In
Cpd3221	CHEMBL15245	COC(=O)[C@H]1[C@@H](O)CC[C@H]2CN3CCc4c([nH]c5ccccc45)[C@@H]3C[C@H]12	IC50	=	Not Active	-1	MAP kinase ERK2	Sub-train	-1	0.973947	0.0260525	In
Cpd3222	CHEMBL16073	CCOc1ccc(NC(=O)C)cc1	IC50	=	Not Active	-1	MAP kinase ERK2	Sub-train	-1	0.958463	0.0415368	In
Cpd3223	CHEMBL6466	O=C1Oc2ccccc2C=C1	IC50	=	Not Active	-1	MAP kinase ERK2	Sub-train	-1	0.940532	0.0594683	In
Cpd3224	CHEMBL141	NC1=NC(=O)N(C=C1)[C@@H]2CS[C@H](CO)O2	IC50	=	Not Active	-1	MAP kinase ERK2	Test	-1	0.981231	0.0187694	In
Cpd3225	CHEMBL495778	COC1=CC(=O)OC1(O)C(=C)C	IC50	=	Not Active	-1	MAP kinase ERK2	Sub-train	-1	0.995967	0.00403257	In
Cpd3227	CHEMBL338790	Nc1ccc2C(=O)NC(=O)c3cccc1c23	IC50	=	Not Active	-1	MAP kinase ERK2	Test	-1	0.989998	0.010002	In
Cpd3228	CHEMBL30008	Fc1ccc(cc1)C(N2CCN(C\C=C\c3ccccc3)CC2)c4ccc(F)cc4	IC50	=	Not Active	-1	MAP kinase ERK2	Test	-1	0.696549	0.303451	In
Cpd3229	CHEMBL622	CCc1cccc2c3CCOC(CC)(CC(=O)O)c3[nH]c12	IC50	=	Not Active	-1	MAP kinase ERK2	Sub-train	-1	0.972	0.0280005	In
Cpd3230	CHEMBL445206	COc1cc(\C=C/C)ccc1O	IC50	=	Not Active	-1	MAP kinase ERK2	Sub-train	-1	0.992928	0.0070718	In
Cpd3231	CHEMBL2205766	CC(C)(C)NS(=O)(=O)c1cncc(c1)c2ccn3nc(N)nc3c2	IC50	>	10000	-1	MAP kinase ERK2	Sub-train	-1	0.997108	0.00289236	In
Cpd3232	CHEMBL4109539	C[C@@H](NC(=O)Nc1cc2[nH]nc(OCC3CCOC3)c2cn1)c4ccccc4	IC50	=	5.4	1	MAP kinase ERK2	Sub-train	1	0.0383188	0.961681	In
Cpd3233	CHEMBL4109593	CC(C)(O)[C@@H](NC(=O)Nc1cc2[nH]nc(OC[C@@H](O)C(F)(F)F)c2cn1)c3ccccc3	IC50	=	1.1	1	MAP kinase ERK2	Test	1	0.0604068	0.939593	In
Cpd3234	CHEMBL4115530	C[C@@H](NC(=O)Nc1cc2[nH]nc(OCCn3ccnc3C)c2cn1)c4ccccc4	IC50	=	2.9	1	MAP kinase ERK2	Sub-train	1	0.0217638	0.978236	In
Cpd3235	CHEMBL4113726	C[C@@H](NC(=O)Nc1cc2[nH]nc(OCC3CCCO3)c2cn1)c4ccccc4	IC50	=	19.8	1	MAP kinase ERK2	Sub-train	1	0.0269826	0.973017	In
Cpd3236	CHEMBL4108259	C[C@@H](NC(=O)Nc1cc2[nH]nc(NC3CCOC3)c2cn1)c4ccccc4	IC50	=	2.3	1	MAP kinase ERK2	Sub-train	1	0.0346106	0.965389	In
Cpd3237	CHEMBL4109803	C[C@@H](NC(=O)Nc1cc2[nH]nc(OCCN3CCCC3=O)c2cn1)c4ccccc4	IC50	=	5.5	1	MAP kinase ERK2	Sub-train	1	0.0753627	0.924637	In
Cpd3239	CHEMBL3931362	Nc1ncc(cc1c2ccc(cc2)C(=O)NCc3ccccc3)C4CCOCC4	IC50	=	55.3	1	MAP kinase ERK2	Sub-train	1	0.0639528	0.936047	In
Cpd3240	CHEMBL3924582	COC(=O)CCc1cnc(N)c(n1)c2ccc(C(=O)NCc3ccccc3)c(F)c2	IC50	=	6030	-1	MAP kinase ERK2	Sub-train	1	0.24848	0.75152	In
Cpd3241	CHEMBL3930173	CN1CC(CC1=O)c2cnc(N)c(c2)c3ccc(C(=O)N[C@H](CO)c4cccc(Cl)c4)c(F)c3	IC50	=	5.44	1	MAP kinase ERK2	Sub-train	1	0.0775739	0.922426	In
Cpd3242	CHEMBL4113136	Cn1nncc1c2cnc(N)c(c2)c3ccc(C(=O)N[C@H](CO)c4cc(F)cc(Cl)c4)c(F)c3	IC50	=	0.169	1	MAP kinase ERK2	Sub-train	1	0.0136287	0.986371	In
Cpd3244	CHEMBL3903725	Nc1ccc(cn1)c2ccc3ncc4C(=O)NC(=O)N(c5cccc(c5)C(F)(F)F)c4c3n2	IC50	>	10000	-1	MAP kinase ERK2	Sub-train	1	0.147421	0.852579	In
Cpd3245	CHEMBL3741589	OC(=O)C1CN(Cc2ccc(OCc3ccc(Cl)c(Cl)c3)cc2)C1	IC50	>	10000	-1	MAP kinase ERK2	Sub-train	-1	0.871902	0.128098	In
Cpd3251	CHEMBL3915179	Nc1ncc(cc1c2cc(F)c(C(=O)NCc3ccccc3)c(c2)C#N)C4CCOCC4	IC50	=	54.6	1	MAP kinase ERK2	Sub-train	1	0.0890594	0.910941	In
Cpd3253	CHEMBL4110508	Cc1nn(C)cc1c2cnc(N)c(c2)c3ccc(C(=O)N[C@H](CO)c4cc(F)cc(CF)c4)c(F)c3	IC50	=	0.0121	1	MAP kinase ERK2	Sub-train	1	0.0481671	0.951833	In
Cpd3254	CHEMBL3933434	CCn1cc(cn1)c2cnc(N)c(n2)c3ccc(C(=O)N[C@H](CO)c4ccccc4)c(F)c3	IC50	=	1.13	1	MAP kinase ERK2	Sub-train	1	0.0691198	0.93088	In
Cpd3255	CHEMBL4112844	C[C@@H]1CC[C@@H](N1)[C@@H](NC(=O)c2ccc3cnc(NC4CCOCC4)nc3c2)c5ccc(Cl)c(F)c5	IC50	=	2	1	MAP kinase ERK2	Sub-train	1	0.0691219	0.930878	In
Cpd3256	CHEMBL3946009	Cn1cc(cn1)[C@@H](NC(=O)c2ccc3cnc(NC4CCOCC4)nc3c2)c5ccc(F)c(Cl)c5	IC50	=	2.7	1	MAP kinase ERK2	Test	1	0.138647	0.861353	In
Cpd3257	CHEMBL3956240	COc1ccc(cc1C#N)[C@H](NC(=O)c2ccc3cnc(NC4CCOCC4)nc3c2)c5cnn(C)c5	IC50	=	3.5	1	MAP kinase ERK2	Sub-train	1	0.122963	0.877037	In
Cpd3258	CHEMBL3961015	COc1ccc(cc1F)[C@H](NC(=O)c2cc(F)c3cnc(NCC4CC4)nc3c2)c5cnn(C)c5	IC50	=	6	1	MAP kinase ERK2	Sub-train	1	0.12415	0.87585	In
Cpd3259	CHEMBL4112116	Nc1ncc(nc1c2ccc(C(=O)N[C@H](CO)c3cccc(Cl)c3)c(F)c2)[C@@H]4CC[C@H](F)CC4	IC50	=	0.371	1	MAP kinase ERK2	Test	1	0.0188422	0.981158	In
Cpd3260	CHEMBL3902533	CCn1ncc2cc3NC(=O)N[C@H](COC[C@@H](O)Cc(n3)c12)c4cccc(Cl)c4	IC50	=	0.9958	1	MAP kinase ERK2	Sub-train	1	0.139359	0.860641	In
Cpd3261	CHEMBL3980079	Cn1ncc2cc3NC(=O)N[C@H](COCCCc(n3)c12)c4ccccc4	IC50	=	10.22	1	MAP kinase ERK2	Sub-train	1	0.166712	0.833288	In
Cpd3262	CHEMBL3962242	CCn1ncc2cc3NC(=O)N[C@@H]([C@@H](OCCCc(n3)c12)[C@H](C)O)c4ccccc4	IC50	=	4.107	1	MAP kinase ERK2	Sub-train	1	0.155053	0.844947	In
Cpd3263	CHEMBL3899948	CCn1ncc2cc3NC(=O)N[C@@H](c4ccccc4)C(C)(C)OC\C=C/c(n3)c12	IC50	=	633.5	-1	MAP kinase ERK2	Sub-train	1	0.171271	0.828729	In
Cpd3264	CHEMBL3927938	CCn1ncc2cc3NC(=O)N[C@H]([C@H](O)OCCCc(n3)c12)c4ccccc4	IC50	=	118.2	1	MAP kinase ERK2	Sub-train	1	0.171887	0.828113	In
Cpd3265	CHEMBL3954524	CCn1ncc2cc3NC(=O)N[C@@H](c4ccccc4)C(C)(C)OCCCc(n3)c12	IC50	=	16.22	1	MAP kinase ERK2	Sub-train	1	0.191642	0.808358	In
Cpd3266	CHEMBL3944501	COc1ccc(cc1F)[C@H](NC(=O)c2cc(F)c3cnc(Nc4ccnn4C)nc3c2)c5cncn5C	IC50	=	1.5	1	MAP kinase ERK2	Sub-train	1	0.0945197	0.90548	In
Cpd3267	CHEMBL4111855	Nc1ncc(nc1c2ccc(C(=O)N[C@H](CO)c3ccccc3)c(F)c2)c4ccncc4	IC50	=	0.21	1	MAP kinase ERK2	Sub-train	1	0.0176801	0.98232	In
Cpd3268	CHEMBL3980387	NC[C@@H](NC(=O)c1ccc(cc1F)c2nc(cnc2N)C3CCOCC3)c4cc(F)cc(I)c4	IC50	=	0.00612	1	MAP kinase ERK2	Test	1	0.10725	0.89275	In
Cpd3269	CHEMBL4112455	Cc1nn(C)cc1c2cnc(N)c(c2)c3ccc(C(=O)N[C@H](CO)c4cccc(c4)S(=O)(=O)C)c(F)c3	IC50	=	0.296	1	MAP kinase ERK2	Sub-train	1	0.162854	0.837146	In
Cpd3270	CHEMBL4109917	CC(C)n1cc(cn1)c2cnc(N)c(c2)c3ccc(C(=O)N[C@H](CO)c4cccc(F)c4)c(F)c3	IC50	=	2.82	1	MAP kinase ERK2	Sub-train	1	0.0588207	0.941179	In
Cpd3271	CHEMBL4110762	Nc1ncc(nc1c2ccc(C(=O)N[C@H](CO)C3CCCCC3)c(F)c2)C4CCOCC4	IC50	=	26.5	1	MAP kinase ERK2	Sub-train	1	0.163434	0.836566	In
Cpd3272	CHEMBL4109264	CC(C)n1cc(cn1)c2cnc(N)c(c2)c3ccc(C(=O)N[C@H](CO)c4ccccc4)c(F)c3	IC50	=	2.06	1	MAP kinase ERK2	Sub-train	1	0.0596065	0.940394	In
Cpd3273	CHEMBL4111138	CCOc1n[nH]c2cc(NC(=O)N[C@H](C)c3ccc(F)cc3)nc([C@@H](C)O)c12	IC50	=	1.7	1	MAP kinase ERK2	Test	1	0.125909	0.874091	In
Cpd3274	CHEMBL3695662	CCNC(=O)Nc1ccc2ncc(Nc3ccc4ccccc4c3)nc2n1	IC50	>	100000	-1	MAP kinase ERK2	Sub-train	1	0.0182682	0.981732	In
Cpd3275	CHEMBL3952296	COc1n[nH]c2cc(NC(=O)NCc3c(F)cccc3Cl)ncc12	IC50	=	97.1	1	MAP kinase ERK2	Test	1	0.0589919	0.941008	In
Cpd3276	CHEMBL4108499	CC[C@@H](NC(=O)Nc1cc2[nH]nc(OC)c2cn1)c3ccc(Cl)cc3	IC50	=	29.5	1	MAP kinase ERK2	Sub-train	1	0.0418732	0.958127	In
Cpd3277	CHEMBL4112876	COC[C@@H](NC(=O)Nc1cc2[nH]nc(OC3CCC(C)(CC3)OC)c2cn1)c4ccccc4	IC50	=	10.6	1	MAP kinase ERK2	Sub-train	1	0.0361269	0.963873	In
Cpd3278	CHEMBL3952538	COc1n[nH]c2cc(NC(=O)NC(C(C)O)c3ccc(F)cc3)ncc12	IC50	=	13.4	1	MAP kinase ERK2	Sub-train	1	0.0524082	0.947592	In
Cpd3280	CHEMBL3943581	CCOc1n[nH]c2cc(NC(=O)N[C@@H](c3ccccc3)C(C)(C)O)ncc12	IC50	=	2.9	1	MAP kinase ERK2	Sub-train	1	0.0721054	0.927895	In
Cpd3281	CHEMBL3946986	CCOc1n[nH]c2cc(NC(=O)N[C@@H](c3ccccc3)C(C)(C)OC)ncc12	IC50	=	1.8	1	MAP kinase ERK2	Sub-train	1	0.072084	0.927916	In
Cpd3282	CHEMBL3947003	COc1ccc(cc1F)[C@H](NC(=O)c2cc(F)c3cnc(NC4(C)COC4)nc3c2)c5cnn(C)c5	IC50	=	6	1	MAP kinase ERK2	Sub-train	1	0.181388	0.818612	In
Cpd3283	CHEMBL3940016	COc1ccc(cc1F)[C@H](NC(=O)c2ccc3cnc(NC4CS(=O)(=O)C4)nc3c2)c5cnn(C)c5	IC50	=	52.8	1	MAP kinase ERK2	Sub-train	-1	0.634193	0.365807	In
Cpd3284	CHEMBL4112054	COc1ccc(cc1F)[C@@H](NC(=O)c2cc(F)c3cnc(NC4CCOCC4)nc3c2)c5cnn(C)c5	IC50	=	15.7	1	MAP kinase ERK2	Test	1	0.15418	0.84582	In
Cpd3285	CHEMBL4112535	Fc1cc(ccc1Cl)[C@H](NC(=O)c2ccc3cnc(NC4CCOCC4)nc3c2)[C@H]5CCCN5	IC50	=	2.3	1	MAP kinase ERK2	Test	1	0.0734234	0.926577	In
Cpd3286	CHEMBL4115243	COC(=O)NC[C@@H](NC(=O)c1ccc(cc1F)c2nc(cnc2N)C3CCOCC3)c4cccc(Cl)c4	IC50	=	0.333	1	MAP kinase ERK2	Sub-train	1	0.0369448	0.963055	In
Cpd3287	CHEMBL3680618	OP(=O)(O)OCOC[C@@H](N1C=CC(=CC1=O)c2ccnc(NC3CCOCC3)n2)c4ccc(Cl)c(F)c4	IC50	=	2.6	1	MAP kinase ERK2	Sub-train	1	0.0995651	0.900435	Outlier
Cpd3289	CHEMBL4111032	C[C@@H](NC(=O)Nc1cc2[nH]nc(N3CCc4nn(C)cc4C3)c2cn1)c5ccc(F)cc5	IC50	=	0.4	1	MAP kinase ERK2	Sub-train	1	0.0757159	0.924284	In
Cpd3290	CHEMBL3905037	CC(C)OC(=O)Nc1n[nH]c2cc(NC(=O)N[C@@H](c3ccc(F)cc3)C(C)(C)O)ncc12	IC50	=	1.1	1	MAP kinase ERK2	Sub-train	1	0.0273811	0.972619	In
Cpd3291	CHEMBL4110866	C[C@@H](NC(=O)Nc1cc2[nH]nc(N3CCCC3=O)c2cn1)c4ccccc4	IC50	=	Not Active	-1	MAP kinase ERK2	Sub-train	1	0.0824654	0.917535	In
Cpd3292	CHEMBL4106704	CCNc1n[nH]c2cc(NC(=O)N[C@@H]3CCC[C@H]3OC)ncc12	IC50	=	99.3	1	MAP kinase ERK2	Sub-train	1	0.312764	0.687236	In
Cpd3293	CHEMBL4111414	COC[C@@H](NC(=O)Nc1cc2[nH]nc(OCCO)c2cn1)c3ccc(F)cc3	IC50	=	1.5	1	MAP kinase ERK2	Sub-train	1	0.0469393	0.953061	In
Cpd3294	CHEMBL4114281	COc1n[nH]c2cc(NC(=O)N[C@H](C)c3ccccc3)nc(OC)c12	IC50	=	2.3	1	MAP kinase ERK2	Sub-train	1	0.126032	0.873968	In
Cpd3295	CHEMBL4113613	CCNC[C@@H](NC(=O)c1ccc(cc1F)c2nc(cnc2N)C3CCOCC3)c4cccc(Br)c4	IC50	=	0.0248	1	MAP kinase ERK2	Sub-train	1	0.0375631	0.962437	In
Cpd3296	CHEMBL4114093	CSc1cc(F)cc(c1)[C@@H](CO)NC(=O)c2ccc(cc2F)c3nc(cnc3N)C4CCOCC4	IC50	=	0.00827	1	MAP kinase ERK2	Sub-train	1	0.038564	0.961436	In
Cpd3297	CHEMBL4111729	CC(=O)NC[C@@H](NC(=O)c1ccc(cc1F)c2nc(cnc2N)[C@@H]3CC[C@@H](O)CC3)c4cccc(Cl)c4	IC50	=	0.238	1	MAP kinase ERK2	Sub-train	1	0.0648465	0.935154	In
Cpd3298	CHEMBL3918549	COc1n[nH]c2cc(NC(=O)N[C@@H](c3ccccc3)C(C)(C)O)nc(C(F)F)c12	IC50	=	2.4	1	MAP kinase ERK2	Sub-train	1	0.0859501	0.91405	In
Cpd3299	CHEMBL4112785	C[C@@H](NC(=O)Nc1cc2[nH]nc(OCc3ccccn3)c2cn1)c4ccc(F)cc4	IC50	=	3	1	MAP kinase ERK2	Sub-train	1	0.00937192	0.990628	In
Cpd3300	CHEMBL4109107	CC(C)N1C[C@H](NC(=O)Nc2cc3[nH]nc(OCC(F)F)c3cn2)[C@H](C1)c4ccccc4	IC50	=	20.2	1	MAP kinase ERK2	Test	1	0.0166216	0.983378	In
Cpd3301	CHEMBL4107946	COC(=O)N1C[C@H](NC(=O)Nc2cc3[nH]nc(OCC(F)F)c3cn2)[C@H](C1)c4ccccc4	IC50	=	1260	-1	MAP kinase ERK2	Sub-train	1	0.021362	0.978638	In
Cpd3302	CHEMBL3897779	COc1n[nH]c2cc(NC(=O)N[C@H]3CCCOc4ccccc34)ncc12	IC50	=	705.7	-1	MAP kinase ERK2	Sub-train	1	0.0786434	0.921357	In
Cpd3303	CHEMBL4112481	COc1n[nH]c2cc(NC(=O)N[C@H](C)c3ccccc3)nc(COCCO)c12	IC50	=	4.5	1	MAP kinase ERK2	Sub-train	1	0.104435	0.895565	In
Cpd3305	CHEMBL3979797	COc1ccc(cc1F)[C@H](NC(=O)c2ccc3cnc(N[C@H]4CCOC[C@@H]4F)nc3c2)c5ccnn5C	IC50	=	3.6	1	MAP kinase ERK2	Sub-train	1	0.0609729	0.939027	In
Cpd3306	CHEMBL3695644	CCNC(=O)Nc1ccc2ncc(Nc3ccc(OC)c(Cl)c3)nc2n1	IC50	>	31600	-1	MAP kinase ERK2	Test	1	0.0609012	0.939099	In
Cpd3307	CHEMBL3589659	OC(=O)c1nc2ccc(I)cc2c3[nH]c4ccc(Cl)cc4c13	IC50	>	10000	-1	MAP kinase ERK2	Sub-train	1	0.428368	0.571632	In
Cpd3308	CHEMBL1922202	CC[C@@H](Nc1nc(NCc2ccccc2)c3ncn(C(C)C)c3n1)C(O)C(C)(C)C	IC50	>	200000	-1	MAP kinase ERK2	Sub-train	-1	0.841049	0.158951	In
Cpd3314	CHEMBL3680613	OC[C@@H](N1C=CC(=CC1=O)c2ccnc(NC3CCOCC3)n2)c4cc5cc(F)ccc5[nH]4	IC50	=	12.1	1	MAP kinase ERK2	Test	1	0.205306	0.794694	In
Cpd3315	CHEMBL4108350	Nc1n[nH]c2cc(NC(=O)N[C@H](CO)c3ccccc3)ncc12	IC50	=	2.5	1	MAP kinase ERK2	Sub-train	1	0.0271049	0.972895	In
Cpd3317	CHEMBL4115126	C[C@@H](O)[C@@H](NC(=O)Nc1cc2[nH]nc(N3CC4CC3CO4)c2cn1)c5ccccc5	IC50	=	0.5	1	MAP kinase ERK2	Sub-train	1	0.0377706	0.962229	In
Cpd3318	CHEMBL4106783	OC[C@@H](NC(=O)Nc1ncc2c(OCc3ccncc3)n[nH]c2c1F)c4ccccc4	IC50	=	0.42	1	MAP kinase ERK2	Test	1	0.0208715	0.979129	In
Cpd3319	CHEMBL4109158	C[C@@H](O)[C@@H](NC(=O)Nc1cc2[nH]nc(OCCOC(F)F)c2c(CO)n1)c3ccc(F)cc3	IC50	=	0.5	1	MAP kinase ERK2	Test	1	0.0675223	0.932478	In
Cpd3320	CHEMBL4106645	Nc1ncc(nc1c2ccc(C(=O)N[C@H](CO)c3cccc(Cl)c3)c(F)c2)[C@@H]4CC[C@H](O)CC4	IC50	=	1.28	1	MAP kinase ERK2	Test	1	0.0232879	0.976712	In
Cpd3321	CHEMBL3900450	COc1ccc(cc1F)[C@H](NC(=O)c2ccc3cnc(NC4CCOCC4)nc3c2)c5cnn(C)c5	IC50	=	1.1	1	MAP kinase ERK2	Sub-train	1	0.133342	0.866658	In
Cpd3322	CHEMBL3890923	Cn1cc(cn1)[C@@H](NC(=O)c2ccc3cnc(NC4CCOCC4)nc3c2)c5ccc(C#N)c(Cl)c5	IC50	=	1.1	1	MAP kinase ERK2	Sub-train	1	0.11966	0.88034	In
Cpd3324	CHEMBL3947367	COc1ccc(cc1F)[C@H](NC(=O)c2cc(F)c3cnc(NC4CCOCC4)nc3c2)c5cn(C)cn5	IC50	=	85.5	1	MAP kinase ERK2	Sub-train	1	0.0872075	0.912793	In
Cpd3325	CHEMBL3976530	C[C@@H](CO)Nc1ncc2CCN(Cc2n1)C(=O)N[C@@H](c3ccc(Cl)c(Cl)c3)C(F)(F)F	IC50	=	3.2	1	MAP kinase ERK2	Sub-train	1	0.0551226	0.944877	In
Cpd3326	CHEMBL4107068	Cn1nncc1c2cnc(N)c(c2)c3ccc(C(=O)N[C@H](CO)c4cc(F)cc(Br)c4)c(F)c3	IC50	=	0.031	1	MAP kinase ERK2	Sub-train	1	0.00964911	0.990351	In
Cpd3327	CHEMBL4112865	Cc1c(cnn1C(F)F)c2cnc(N)c(c2)c3ccc(C(=O)N[C@H](CO)c4cccc(c4)C(F)F)c(F)c3	IC50	=	0.0745	1	MAP kinase ERK2	Sub-train	1	0.0213537	0.978646	In
Cpd3328	CHEMBL3962206	Cc1ccnc(CNC(=O)c2ccc(cc2F)c3cc(cnc3N)C4CCOCC4)n1	IC50	=	1340	-1	MAP kinase ERK2	Test	1	0.0753639	0.924636	In
Cpd3330	CHEMBL3964791	COc1ccc(cc1F)[C@H](NC(=O)c2ccc3cnc(Nc4ccnn4C)nc3c2)c5cnn(C)c5	IC50	=	2.1	1	MAP kinase ERK2	Sub-train	1	0.0797214	0.920279	In
Cpd3331	CHEMBL4110106	C[C@@H](NC(=O)c1ccc(cc1F)c2nc(cnc2N)C3CC3)c4cc(F)cc(c4)S(=O)(=O)C	IC50	=	0.794	1	MAP kinase ERK2	Test	1	0.216119	0.783881	In
Cpd3332	CHEMBL4114001	COc1ccc(cc1F)[C@H](NC(=O)c2cc(F)c3cnc(NC4CCOCC4)nc3c2)[C@H]5CCCN5	IC50	=	9	1	MAP kinase ERK2	Sub-train	1	0.0924075	0.907593	In
Cpd3333	CHEMBL3920813	Cn1cc(cn1)[C@@H](NC(=O)c2ccc3cnc(NC4CCOCC4)nc3c2)c5ccc(OC(F)F)cc5	IC50	=	0.55	1	MAP kinase ERK2	Test	1	0.0810739	0.918926	In
Cpd3334	CHEMBL4111668	Nc1ncc(cc1c2ccc(C(=O)N[C@H](CO)c3cccc(Cl)c3)c(F)c2)[C@@H]4CC[C@@H](O)CC4	IC50	=	0.339	1	MAP kinase ERK2	Sub-train	1	0.0154983	0.984502	In
Cpd3340	CHEMBL4110248	C[C@@H](NC(=O)Nc1cc2[nH]nc(N3CCCC3C(=O)O)c2c(C)n1)c4ccccc4	IC50	=	74.7	1	MAP kinase ERK2	Sub-train	1	0.0951004	0.9049	In
Cpd3341	CHEMBL4107493	COc1n[nH]c2cc(NC(=O)N[C@H](C)c3ccccc3)nc(c4nnc(C)s4)c12	IC50	=	8.4	1	MAP kinase ERK2	Sub-train	1	0.273405	0.726595	In
Cpd3344	CHEMBL1933582	CN1CCN(CC1)c2ccc(OC(F)(F)F)c(Nc3nccc(n3)c4cc5C(=O)NCCc5n4C)c2	IC50	>	10000	-1	MAP kinase ERK2	Sub-train	1	0.0603414	0.939659	In
Cpd3346	CHEMBL4111410	Cc1nn(C)cc1c2cnc(N)c(c2)c3ccc(C(=O)N[C@H](CN)c4cccc(Cl)c4)c(F)c3	IC50	=	0.0497	1	MAP kinase ERK2	Sub-train	1	0.0397456	0.960254	In
Cpd3347	CHEMBL4108598	Cn1nccc1c2cnc(N)c(c2)c3ccc(C(=O)N[C@H](CO)c4cccc(c4)S(=O)(=O)C)c(F)c3	IC50	=	0.899	1	MAP kinase ERK2	Sub-train	1	0.165174	0.834826	In
Cpd3348	CHEMBL4108337	Cn1nccc1c2cnc(N)c(c2)c3ccc(C(=O)N[C@H](CO)c4cc(F)cc(Cl)c4)c(F)c3	IC50	=	0.257	1	MAP kinase ERK2	Test	1	0.040308	0.959692	In
Cpd3349	CHEMBL3654838	CN1C[C@H](NC(=O)Nc2cc3[nH]nc(c4ccnc(C)c4)c3cn2)[C@H](C1)c5ccc(F)cc5	IC50	=	0.7313	1	MAP kinase ERK2	Sub-train	1	0.0111994	0.988801	In
Cpd3351	CHEMBL3590125	Cc1cnc(Nc2ccnn2C)nc1Nc3ccccc3NC(=O)C=C	IC50	=	47	1	MAP kinase ERK2	Sub-train	-1	0.525464	0.474536	In
Cpd3352	CHEMBL3979074	CCOc1n[nH]c2cc(NC(=O)N[C@@H]3CN(C)C[C@H]3c4ccccc4)ncc12	IC50	=	1.25	1	MAP kinase ERK2	Sub-train	1	0.0544594	0.945541	In
Cpd3353	CHEMBL4111428	CCOc1n[nH]c2cc(NC(=O)N[C@H]([C@@H](C)O)c3ccccc3)ncc12	IC50	=	1.3	1	MAP kinase ERK2	Test	1	0.0423986	0.957601	In
Cpd3354	CHEMBL3409585	OCC(N1C=CC(=CC1=O)c2ccnc(NC3CCOCC3)n2)c4cc(F)cc(Cl)c4	IC50	=	3.8	1	MAP kinase ERK2	Test	1	0.278626	0.721374	In
Cpd3355	CHEMBL4113745	CCOc1n[nH]c2cc(NC(=O)N[C@@H]3CN(C)[C@@H](C(F)F)[C@H]3c4ccccc4)ncc12	IC50	=	43.2	1	MAP kinase ERK2	Sub-train	1	0.0321386	0.967861	In
Cpd3356	CHEMBL4109167	CC(=O)Nc1n[nH]c2cc(NC(=O)N[C@H](COC(F)F)c3ccccc3)ncc12	IC50	=	0.3	1	MAP kinase ERK2	Sub-train	1	0.0266458	0.973354	In
Cpd3357	CHEMBL3933660	COc1n[nH]c2cc(NC(=O)NCc3cccnc3N(C)C)nc(CO)c12	IC50	=	544.3	-1	MAP kinase ERK2	Test	1	0.220387	0.779613	In
Cpd3358	CHEMBL1983268	CN1CCN(CC1)c2ccc(C(=O)Nc3n[nH]c4ccc(Cc5cc(F)cc(F)c5)cc34)c(NC6CCOCC6)c2	IC50	>	10000	-1	MAP kinase ERK2	Sub-train	1	0.0648008	0.935199	In
Cpd3360	CHEMBL3785500	Nc1ncnc2c1c(cn2[C@@H]3C[C@H](CN4CCC4)C3)c5cccc(OCC67CCC(CC6)O7)c5	IC50	>	10000	-1	MAP kinase ERK2	Test	-1	0.775693	0.224307	In
Cpd3361	CHEMBL3785951	CC(=O)N1CCN(CC1)[C@@H]2C[C@@H](C2)n3cc(c4cc(OC[C@@H]5CCCO5)ccc4F)c6c(N)ncnc36	IC50	>	10000	-1	MAP kinase ERK2	Sub-train	-1	0.639095	0.360905	In
Cpd3362	CHEMBL84	CC[C@@]1(O)C(=O)OCC2=C1C=C3N(Cc4cc5c(CN(C)C)c(O)ccc5nc34)C2=O	IC50	=	Not Active	-1	MAP kinase ERK2	Sub-train	-1	0.93862	0.0613796	In
Cpd3364	CHEMBL3590108	COc1cc(O)c2C(=O)O[C@@H](C)C\C=C\C(=O)[C@H](O)[C@@H](O)C\C=C\c2c1	IC50	=	5100	-1	MAP kinase ERK2	Test	-1	0.92919	0.0708098	In
Cpd3368	CHEMBL3590120	Clc1cnc(NC2CCOCC2)nc1Nc3ccncc3NC(=O)C=C	IC50	=	3.1	1	MAP kinase ERK2	Sub-train	-1	0.649453	0.350547	In
Cpd3372	CHEMBL3590122	Cc1cnc(NC2CCOCC2)nc1Nc3ccccc3NC(=O)C=C	IC50	=	88	1	MAP kinase ERK2	Sub-train	1	0.427146	0.572854	In
Cpd3373	CHEMBL3780758	C1CCN(CC1)c2ccc(Nc3nccc4nc(cnc34)c5ccccc5)cc2	IC50	=	1420	-1	MAP kinase ERK2	Sub-train	1	0.337034	0.662966	In
Cpd3374	CHEMBL3781479	C1CCN(CC1)c2ccc(Nc3cncc4nc(cnc34)c5ccccc5)cc2	IC50	=	2340	-1	MAP kinase ERK2	Sub-train	1	0.339169	0.660831	In
Cpd3375	CHEMBL259551	Nc1n[nH]c2nnc(cc12)c3c(nn4ccccc34)c5ccccc5	IC50	=	1900	-1	MAP kinase ERK2	Test	-1	0.808082	0.191918	In
Cpd3377	CHEMBL213423	CC(C)c1nnc2ccc(cn12)c3ocnc3c4cc(F)c(F)cc4F	IC50	>	10000	-1	MAP kinase ERK2	Sub-train	-1	0.62442	0.37558	In
Cpd3379	CHEMBL3781159	COc1cccc(Nc2cc3nc(cnc3cn2)c4ccccc4)c1	IC50	>	100000	-1	MAP kinase ERK2	Test	1	0.351814	0.648186	In
Cpd3380	CHEMBL3662965	Cc1cc(ccn1)c2n[nH]c3cc(NC(=O)NC(C(F)F)c4cccnc4)ncc23	IC50	=	3.071	1	MAP kinase ERK2	Sub-train	1	0.015509	0.984491	In
Cpd3381	CHEMBL3658651	C[C@@H](NC(=O)Nc1cc2[nH]nc(c3ccnc(c3)N4CCOCC4)c2cn1)c5ccc(F)cc5	IC50	=	1.911	1	MAP kinase ERK2	Sub-train	1	0.00738189	0.992618	In
Cpd3382	CHEMBL3654727	C[C@@H](NC(=O)Nc1cc2[nH]nc(c3cccc(Cl)c3)c2cn1)c4ccc(F)c(Cl)c4	IC50	=	56.07	1	MAP kinase ERK2	Test	1	0.00502652	0.994973	In
Cpd3383	CHEMBL3654733	C[C@@H](NC(=O)Nc1cc2[nH]nc(C3CC3)c2cn1)c4ccc(F)c(Cl)c4	IC50	=	10.77	1	MAP kinase ERK2	Sub-train	1	0.0183908	0.981609	In
Cpd3384	CHEMBL3658650	Cc1cc(ccn1)c2n[nH]c3cc(NC(=O)N[C@@H](c4ccc(F)cc4)C(F)(F)F)ncc23	IC50	=	9.826	1	MAP kinase ERK2	Sub-train	1	0.0100204	0.98998	In
Cpd3385	CHEMBL3977360	Fc1cc(ccc1Cl)[C@H](NC(=O)N2CCc3cnc(NC4CCOCC4)nc3C2)c5oncc5	IC50	=	4	1	MAP kinase ERK2	Sub-train	1	0.0165079	0.983492	In
Cpd3386	CHEMBL4110806	C[C@@H](NC(=O)N1CCc2cnc(NC3CCN(C)CC3)nc2C1)c4ccc(Cl)c(Cl)c4	IC50	=	112.8	1	MAP kinase ERK2	Sub-train	1	0.0454342	0.954566	In
Cpd3387	CHEMBL3663008	Cc1cc(ccn1)c2n[nH]c3cc(NC(=O)N[C@H]([C@H]4CCCO4)c5ccccc5)ncc23	IC50	=	0.2599	1	MAP kinase ERK2	Sub-train	1	0.0064371	0.993563	In
Cpd3390	CHEMBL4108198	C[C@@H](NC(=O)Nc1cc2[nH]nc(OCC(=O)N(C)C)c2cn1)c3ccccc3	IC50	=	22.62	1	MAP kinase ERK2	Sub-train	1	0.111678	0.888322	In
Cpd3391	CHEMBL3658634	Cc1cc(ccn1)c2n[nH]c3cc(NC(=O)N[C@@H]4CCSc5ccccc45)ncc23	IC50	=	2.079	1	MAP kinase ERK2	Test	1	0.0252142	0.974786	In
Cpd3392	CHEMBL3658637	Cc1cc(ccn1)c2n[nH]c3cc(NC(=O)N[C@@H]4CCOc5cc(F)ccc45)ncc23	IC50	=	6.331	1	MAP kinase ERK2	Sub-train	1	0.0109608	0.989039	In
Cpd3393	CHEMBL3658782	Cc1cc(ccn1)c2n[nH]c3cc(NC(=O)NCc4cc[nH]n4)ncc23	IC50	=	2.717	1	MAP kinase ERK2	Sub-train	1	0.0446123	0.955388	In
Cpd3394	CHEMBL3658801	Cc1cc(ccn1)c2n[nH]c3cc(NC(=O)NCc4nncs4)ncc23	IC50	=	6.596	1	MAP kinase ERK2	Sub-train	1	0.0460915	0.953909	In
Cpd3395	CHEMBL3658808	Cc1cc(ccn1)c2n[nH]c3cc(NC(=O)NCc4ccc(cc4)C#N)ncc23	IC50	=	3.735	1	MAP kinase ERK2	Sub-train	1	0.0437645	0.956235	In
Cpd3396	CHEMBL4113361	C[C@@H](Nc1ncc2CC[C@@H](Cc2n1)C(=O)N[C@H](CO)c3ccc(OC(F)F)cc3)C4CC4	IC50	=	109	1	MAP kinase ERK2	Sub-train	1	0.116265	0.883735	In
Cpd3397	CHEMBL3823030	C[C@@H](O)C(=O)N1CCC(CC1)n2nc(C)c(Nc3ncc(Cl)c(n3)c4cnn5ccccc45)c2C	IC50	=	600	-1	MAP kinase ERK2	Sub-train	-1	0.870689	0.129311	In
Cpd3398	CHEMBL3934597	COCC(NC(=O)Nc1cc2[nH]nc(NC3CCOC3)c2cn1)c4ccccc4	IC50	=	1.1	1	MAP kinase ERK2	Sub-train	1	0.0419274	0.958073	In
Cpd3405	CHEMBL4103768	Cn1c2CCN(Cc3ccccc3)C(=O)c2cc1c4ccnc(NC5CCOCC5)n4	IC50	=	1.6	1	MAP kinase ERK2	Sub-train	1	0.288599	0.711401	In
Cpd3411	CHEMBL3658784	Cc1cc(ccn1)c2n[nH]c3cc(NC(=O)NCc4cnn(C)c4)ncc23	IC50	=	4.35	1	MAP kinase ERK2	Sub-train	1	0.125574	0.874426	In
Cpd3412	CHEMBL3658787	Cc1cc(ccn1)c2n[nH]c3cc(NC(=O)NCc4ncnn4C)ncc23	IC50	=	2.552	1	MAP kinase ERK2	Sub-train	1	0.173852	0.826148	In
Cpd3413	CHEMBL3658806	Cc1cc(ccn1)c2n[nH]c3cc(NC(=O)NCc4ccc(Cl)cc4Cl)ncc23	IC50	=	11.81	1	MAP kinase ERK2	Test	1	0.0056904	0.99431	In
Cpd3414	CHEMBL3979810	CCCC(NC(=O)N1CCc2cnc(N[C@@H](C)CO)nc2C1)c3ccc(OC)c(F)c3	IC50	=	2.3	1	MAP kinase ERK2	Sub-train	1	0.0710248	0.928975	In
Cpd3416	CHEMBL4097186	O=C1N(Cc2ccccc2)CCc3[nH]c(cc13)c4ccnc(NC5CCOCC5)n4	IC50	<	0.32	1	MAP kinase ERK2	Sub-train	1	0.203608	0.796392	In
Cpd3419	CHEMBL4088284	COCCN1[C@H](C)Cc2[nH]c(cc2C1=O)c3ccnc(Nc4ccnn4C)n3	IC50	=	14	1	MAP kinase ERK2	Sub-train	-1	0.702636	0.297364	In
Cpd3421	CHEMBL3658759	Cc1cc(ccn1)c2n[nH]c3cc(NC(=O)NCc4cc5ccccc5cn4)ncc23	IC50	=	7.659	1	MAP kinase ERK2	Test	1	0.00467891	0.995321	In
Cpd3422	CHEMBL3658795	Cc1cc(ccn1)c2n[nH]c3cc(NC(=O)NCc4cscn4)ncc23	IC50	=	0.7445	1	MAP kinase ERK2	Test	1	0.0390877	0.960912	In
Cpd3423	CHEMBL3900510	CC(C)Nc1ncc2CCN(Cc2n1)C(=O)NC(CCC#N)c3ccc(Cl)c(Cl)c3	IC50	=	2.2	1	MAP kinase ERK2	Sub-train	1	0.128954	0.871046	In
Cpd3424	CHEMBL3662966	Cc1cc(ccn1)c2n[nH]c3cc(NC(=O)NCc4cnccc4C(F)(F)F)ncc23	IC50	=	3.661	1	MAP kinase ERK2	Test	1	0.0137207	0.986279	In
Cpd3425	CHEMBL3662969	Cc1cc(ccn1)c2n[nH]c3cc(NC(=O)NCc4ccc(F)cc4F)ncc23	IC50	=	1.561	1	MAP kinase ERK2	Sub-train	1	0.0152461	0.984754	In
Cpd3427	CHEMBL4115211	CC(C)OC(=O)Nc1n[nH]c2cc(NC(=O)N[C@H](C)c3ccccc3)ncc12	IC50	=	12.4	1	MAP kinase ERK2	Sub-train	1	0.0269564	0.973044	In
Cpd3428	CHEMBL3662951	COc1ncccc1CNC(=O)Nc2cc3[nH]nc(c4ccnc(C)c4)c3cn2	IC50	=	0.6076	1	MAP kinase ERK2	Sub-train	1	0.0230187	0.976981	In
Cpd3429	CHEMBL3658648	Cc1cc(ccn1)c2n[nH]c3cc(NC(=O)N4CC(C4)c5cccc(F)c5)ncc23	IC50	=	43.36	1	MAP kinase ERK2	Sub-train	1	0.0116711	0.988329	In
Cpd3430	CHEMBL3671095	C[C@H](CCCc1ccccc1)NC(=O)Nc2ccc3ncc(nc3n2)c4ccncc4	IC50	=	2	1	MAP kinase ERK2	Sub-train	1	0.00631579	0.993684	In
Cpd3431	CHEMBL4114836	COCC(C)(C)Nc1n[nH]c2cc(NC(=O)N[C@H](C)c3ccccc3)ncc12	IC50	=	385	1	MAP kinase ERK2	Test	1	0.0842691	0.915731	In
Cpd3432	CHEMBL4114911	Nc1n[nH]c2c(Cl)c(NC(=O)N[C@H](COC(F)F)c3ccccc3)ncc12	IC50	=	52.2	1	MAP kinase ERK2	Sub-train	1	0.0427905	0.957209	In
Cpd3433	CHEMBL4112282	Nc1ncc(nc1c2ccc(C(=O)N[C@H](CO)c3cccc(Cl)c3)c(F)c2)[C@@H]4CC[C@@H](F)CC4	IC50	=	0.184	1	MAP kinase ERK2	Test	1	0.0188422	0.981158	In
Cpd3434	CHEMBL4112672	Nc1ncc(nc1c2ccc(C(=O)N[C@H](CO)c3cccc(I)c3)c(F)c2)[C@@H]4CC[C@H](O)CC4	IC50	=	0.193	1	MAP kinase ERK2	Sub-train	1	0.0636924	0.936308	In
Cpd3435	CHEMBL3916081	CC(C)(O)[C@@H](NC(=O)Nc1cc2[nH]nc(NC(=O)N3C[C@H]4COC[C@H]4C3)c2cn1)c5ccc(F)cc5	IC50	=	3.7	1	MAP kinase ERK2	Sub-train	1	0.0849084	0.915092	In
Cpd3436	CHEMBL4114003	COc1n[nH]c2cc(NC(=O)N[C@H]([C@@H](C)O)c3ccc(F)cc3)nc(CO)c12	IC50	=	3.2	1	MAP kinase ERK2	Test	1	0.0785769	0.921423	In
Cpd3437	CHEMBL3981912	CCOc1n[nH]c2cc(NC(=O)N[C@@H](c3ccccc3)C(C)(C)O)nc(CO)c12	IC50	=	0.4	1	MAP kinase ERK2	Sub-train	1	0.0845181	0.915482	In
Cpd3438	CHEMBL4113039	Nc1ncc(nc1c2ccc(C(=O)N[C@H](CN=[N+]=[N-])c3cccc(Cl)c3)c(F)c2)[C@@H]4CC[C@@H](O)CC4	IC50	=	0.436	1	MAP kinase ERK2	Sub-train	1	0.0498085	0.950192	In
Cpd3439	CHEMBL3955508	Clc1ccc(cc1Cl)[C@H](NC(=O)N2CCc3cnc(NC4CCOCC4)nc3C2)c5ocnc5	IC50	=	1.1	1	MAP kinase ERK2	Sub-train	1	0.0435715	0.956428	In
Cpd3441	CHEMBL3971980	CC(C)(O)[C@@H](NC(=O)Nc1cc2[nH]nc(OCCO)c2cn1)c3ccc(F)cc3	IC50	=	0.5	1	MAP kinase ERK2	Sub-train	1	0.0532147	0.946785	In
Cpd3443	CHEMBL4112660	C[C@@H](NC(=O)c1ccc(cc1F)c2cc(cnc2N)C3CCNC(=O)C3)c4cccc(Cl)c4	IC50	=	1.35	1	MAP kinase ERK2	Test	1	0.0706243	0.929376	In
Cpd3444	CHEMBL4112973	C[C@@H](NC(=O)Nc1cc2[nH]nc(NC(=O)C3CC3)c2cn1)c4ccccc4	IC50	=	1	1	MAP kinase ERK2	Test	1	0.043334	0.956666	In
Cpd3445	CHEMBL4109871	COC(=O)Nc1n[nH]c2cc(NC(=O)N[C@H](C)c3ccc(Cl)c(OC)c3)ncc12	IC50	=	5.2	1	MAP kinase ERK2	Sub-train	1	0.0206721	0.979328	In
Cpd3446	CHEMBL3943792	C[C@H](NC(=O)Nc1cc2[nH]nc(N)c2c(C)n1)c3ccccc3	IC50	=	0.7	1	MAP kinase ERK2	Sub-train	1	0.0382678	0.961732	In
Cpd3447	CHEMBL4106908	COC[C@@H](NC(=O)Nc1cc2[nH]nc(NCC(F)(F)F)c2cn1)c3ccccc3	IC50	=	0.9	1	MAP kinase ERK2	Sub-train	1	0.0245338	0.975466	In
Cpd3448	CHEMBL4114455	CC[C@@H](NC(=O)Nc1cc2[nH]nc(N3CCCC3)c2cn1)c4ccccn4	IC50	=	1021	-1	MAP kinase ERK2	Sub-train	1	0.124325	0.875675	In
Cpd3451	CHEMBL4107991	COc1n[nH]c2cc(NC(=O)N[C@H](C)c3ccc(Cl)c(O)c3)nc(CO)c12	IC50	=	0.5	1	MAP kinase ERK2	Sub-train	1	0.0584294	0.941571	In
Cpd3452	CHEMBL4110161	COC[C@@H](NC(=O)Nc1cc2[nH]nc(OC)c2cn1)c3ccc(F)cc3	IC50	=	748.4	-1	MAP kinase ERK2	Test	1	0.0541826	0.945817	In
Cpd3453	CHEMBL3889673	CCOc1n[nH]c2cc(NC(=O)N[C@@H](COC)c3ccccn3)ncc12	IC50	=	1410	-1	MAP kinase ERK2	Sub-train	1	0.106623	0.893377	In
Cpd3454	CHEMBL4115396	CCOc1n[nH]c2cc(NC(=O)N[C@H](COC)c3ccccn3)ncc12	IC50	=	64.03	1	MAP kinase ERK2	Sub-train	1	0.106623	0.893377	In
Cpd3455	CHEMBL4109875	COc1n[nH]c2cc(NC(=O)N[C@H]3CN(C)C[C@@H]3c4ccccc4)ncc12	IC50	=	169.5	1	MAP kinase ERK2	Sub-train	1	0.0687228	0.931277	In
Cpd3456	CHEMBL4109369	COc1n[nH]c2cc(NC(=O)N[C@H]3CN(C)C[C@@H]3c4ccccc4C(F)(F)F)ncc12	IC50	=	1570	-1	MAP kinase ERK2	Sub-train	1	0.137799	0.862201	In
Cpd3457	CHEMBL4108642	COC[C@@H](NC(=O)Nc1cc2[nH]nc(OC3CCOCC3)c2c(C)n1)c4ccccc4	IC50	=	0.34	1	MAP kinase ERK2	Sub-train	1	0.0971723	0.902828	In
Cpd3458	CHEMBL3675701	OC[C@@H](N1C=CC(=CC1=O)c2ccnc(N[C@H]3CCOC[C@H]3F)n2)c4ccc(Cl)c(F)c4	IC50	=	3.2	1	MAP kinase ERK2	Sub-train	1	0.214773	0.785227	In
Cpd3459	CHEMBL3544964	Cn1nccc1Nc2nccc(n2)C3=CC(=O)N(C=C3)[C@H](CO)c4ccc(Cl)c(F)c4	IC50	=	3.3	1	MAP kinase ERK2	Sub-train	1	0.381537	0.618463	In
Cpd3460	CHEMBL3675710	C[C@@H](CO)Nc1nccc(n1)C2=CC(=O)N(C=C2)C(CO)c3ccc(F)c(Cl)c3	IC50	=	53	1	MAP kinase ERK2	Sub-train	1	0.375928	0.624072	In
Cpd3462	CHEMBL4112935	CNC[C@@H](NC(=O)c1ccc(cc1F)c2nc(cnc2N)[C@@H]3CC[C@H](CC3)OC)c4cccc(Br)c4	IC50	=	0.0401	1	MAP kinase ERK2	Sub-train	1	0.0423946	0.957605	In
Cpd3463	CHEMBL4112962	CNC[C@@H](NC(=O)c1ccc(cc1F)c2nc(cnc2N)[C@@H]3CC[C@@H](O)CC3)c4cccc(Br)c4	IC50	=	0.0209	1	MAP kinase ERK2	Sub-train	1	0.029002	0.970998	In
Cpd3464	CHEMBL4108368	CO[C@@H]1CC[C@H](CC1)c2cnc(N)c(n2)c3ccc(C(=O)N[C@H](CN)c4cccc(Br)c4)c(F)c3	IC50	=	0.0689	1	MAP kinase ERK2	Sub-train	1	0.0244788	0.975521	In
Cpd3465	CHEMBL4108154	Nc1ncc(nc1c2ccc(C(=O)N[C@H](CO)c3cccc(Br)c3)c(F)c2)C4CCCC(O)C4	IC50	=	0.122	1	MAP kinase ERK2	Sub-train	1	0.0172495	0.982751	In
Cpd3466	CHEMBL4108345	CSc1cccc(c1)[C@@H](CO)NC(=O)c2ccc(cc2F)c3nc(cnc3N)C4CCOCC4	IC50	=	0.01	1	MAP kinase ERK2	Sub-train	1	0.0362746	0.963725	In
Cpd3467	CHEMBL4107391	NC[C@@H](NC(=O)c1ccc(cc1F)c2nc(cnc2N)[C@@H]3CC[C@@H](O)CC3)c4cccc(Cl)c4	IC50	=	0.0452	1	MAP kinase ERK2	Sub-train	1	0.0238151	0.976185	In
Cpd3468	CHEMBL4107805	C[C@@H](NC(=O)Nc1cc2[nH]nc(OCCO)c2cn1)c3ccccc3	IC50	=	1.6	1	MAP kinase ERK2	Sub-train	1	0.0398698	0.96013	In
Cpd3469	CHEMBL4113826	C[C@@H](NC(=O)Nc1cc2[nH]nc(OC[C@@H](O)C(F)(F)F)c2cn1)c3ccccc3	IC50	=	32.9	1	MAP kinase ERK2	Sub-train	1	0.0387719	0.961228	In
Cpd3470	CHEMBL3927870	CS(=O)(=O)NC1CCC(CC1)c2cnc(N)c(n2)c3ccc(C(=O)N[C@H](CO)c4cccc(Cl)c4)c(F)c3	IC50	=	0.26	1	MAP kinase ERK2	Sub-train	1	0.117747	0.882253	In
Cpd3471	CHEMBL4107220	COC[C@@H](NC(=O)Nc1cc2[nH]nc(OC3C[C@@H](C)O[C@@H](C)C3)c2cn1)c4ccccc4	IC50	=	5.3	1	MAP kinase ERK2	Sub-train	1	0.0503924	0.949608	In
Cpd3472	CHEMBL3935684	CN1CC(CCC1=O)c2cnc(N)c(c2)c3ccc(C(=O)N[C@H](CO)c4cccc(Cl)c4)c(F)c3	IC50	=	1.09	1	MAP kinase ERK2	Sub-train	1	0.108576	0.891424	In
Cpd3474	CHEMBL850	C[C@@H]1CN(C[C@H](C)N1)c2c(F)c(N)c3C(=O)C(=CN(C4CC4)c3c2F)C(=O)O	IC50	=	Not Active	-1	MAP kinase ERK2	Sub-train	-1	0.997229	0.00277118	In
Cpd3475	CHEMBL62193	COc1cc(NS(=O)(=O)c2ccc(N)cc2)nc(OC)n1	IC50	=	Not Active	-1	MAP kinase ERK2	Sub-train	-1	0.956838	0.0431618	In
Cpd3477	CHEMBL1069	CCCCC(=O)N(Cc1ccc(cc1)c2ccccc2c3nnn[nH]3)[C@@H](C(C)C)C(=O)O	IC50	=	Not Active	-1	MAP kinase ERK2	Test	1	0.142238	0.857762	In
Cpd3478	CHEMBL3590117	Clc1cnc(NC2CCOCC2)cc1Nc3ccccc3NC(=O)C=C	IC50	=	60	1	MAP kinase ERK2	Sub-train	1	0.464824	0.535176	In
Cpd3480	CHEMBL3590118	Clc1cnc(NC2CCOCC2)nc1Nc3ccccc3NC(=O)C=C	IC50	=	8.5	1	MAP kinase ERK2	Sub-train	-1	0.576662	0.423338	In
Cpd3481	CHEMBL31	COc1c(N2CCNC(C)C2)c(F)cc3C(=O)C(=CN(C4CC4)c13)C(=O)O	IC50	=	Not Active	-1	MAP kinase ERK2	Sub-train	-1	0.997756	0.0022437	In
Cpd3482	CHEMBL445	CNCCC=C1c2ccccc2CCc3ccccc13	IC50	=	Not Active	-1	MAP kinase ERK2	Sub-train	-1	0.990898	0.00910184	In
Cpd3483	CHEMBL461727	OC[C@H]1O[C@@H](OC[C@H]2O[C@@H](O[C@@H](C#N)c3ccccc3)[C@H](O)[C@@H](O)[C@@H]2O)[C@H](O)[C@@H](O)[C@@H]1O	IC50	=	Not Active	-1	MAP kinase ERK2	Test	-1	0.725073	0.274927	In
Cpd3484	CHEMBL30327	Clc1cc2Oc3cc(Cl)c(Cl)cc3Oc2cc1Cl	IC50	=	Not Active	-1	MAP kinase ERK2	Sub-train	-1	0.980472	0.0195284	In
Cpd3486	CHEMBL267648	CCN1C=C(C(=O)O)C(=O)c2cc(F)c(cc12)N3CCN(C)CC3	IC50	=	Not Active	-1	MAP kinase ERK2	Sub-train	-1	0.995985	0.00401486	In
Cpd3488	CHEMBL3590112	CCS(=O)(=O)N1CCc2cnc(NC3CCOCC3)nc2C1	IC50	>	10000	-1	MAP kinase ERK2	Test	-1	0.992606	0.00739397	In
Cpd3489	CHEMBL580	OC1N=C(c2ccccc2Cl)c3cc(Cl)ccc3NC1=O	IC50	=	Not Active	-1	MAP kinase ERK2	Test	-1	0.963907	0.0360931	In
Cpd3490	CHEMBL689	OC[C@@H](O)[C@@H](O)[C@H](O)[C@H](O)CO	IC50	=	Not Active	-1	MAP kinase ERK2	Sub-train	-1	0.999259	0.000740721	In
Cpd3491	CHEMBL1373	NC(=O)C[S+]([O-])C(c1ccccc1)c2ccccc2	IC50	=	Not Active	-1	MAP kinase ERK2	Sub-train	-1	0.965839	0.0341609	In
Cpd3492	CHEMBL268291	CN(C)C=O	IC50	=	Not Active	-1	MAP kinase ERK2	Sub-train	-1	0.999886	0.00011407	Outlier
Cpd3495	CHEMBL55	NC(=N)c1ccc(OCCCCCOc2ccc(cc2)C(=N)N)cc1	IC50	=	Not Active	-1	MAP kinase ERK2	Sub-train	-1	0.615806	0.384194	In
Cpd3497	CHEMBL3695659	CCNC(=O)Nc1ccc2ncc(Nc3ccccc3C)nc2n1	IC50	=	5800	-1	MAP kinase ERK2	Sub-train	1	0.0725494	0.927451	In
Cpd3498	CHEMBL3671118	C[C@H](CCCc1ccccc1)NC(=O)Nc2ccc3ncc(nc3n2)c4cnn(C)c4	IC50	=	6	1	MAP kinase ERK2	Sub-train	1	0.0252419	0.974758	In
Cpd3499	CHEMBL1697694	COc1cc2O[C@H]3OC=C[C@H]3c2c4OC(=O)C5=C(CCC5=O)c14	IC50	=	Not Active	-1	MAP kinase ERK2	Sub-train	-1	0.988472	0.011528	In
Cpd3500	CHEMBL3671100	OCCCn1cc(cn1)c2cnc3ccc(NC(=O)NCCCCc4ccccc4)nc3n2	IC50	=	2	1	MAP kinase ERK2	Sub-train	1	0.0216663	0.978334	In
Cpd3501	CHEMBL3671108	CCCn1cc(cn1)c2cnc3ccc(NC(=O)N[C@H](C)CCCc4ccccc4)nc3n2	IC50	=	4	1	MAP kinase ERK2	Sub-train	1	0.0283511	0.971649	In
Cpd3502	CHEMBL509	Cc1ccc(Cl)c(Nc2ccccc2C(=O)O)c1Cl	IC50	=	3144	-1	MAP kinase ERK2	Sub-train	-1	0.928968	0.0710317	In
Cpd3504	CHEMBL1200656	C[C@@H]1C\C=C\C=C\C=C\C=C\[C@@H](C[C@@H]2O[C@](O)(C[C@@H](O)C[C@H]3O[C@@H]3\C=C\C(=O)O1)C[C@H](O)[C@H]2C(=O)O)O[C@@H]4O[C@H](C)[C@@H](O)[C@H](N)[C@@H]4O	IC50	=	Not Active	-1	MAP kinase ERK2	Sub-train	-1	0.712496	0.287504	In
Cpd3505	CHEMBL47244	CC(=C)[C@@H]1[C@H]2OC(=O)[C@@H]1[C@]3(O)C[C@H]4O[C@]45C(=O)O[C@H]2[C@]35C	IC50	=	Not Active	-1	MAP kinase ERK2	Test	-1	0.997537	0.00246301	In
Cpd3506	CHEMBL660	NC12CC3CC(CC(C3)C1)C2	IC50	=	Not Active	-1	MAP kinase ERK2	Test	-1	0.998707	0.00129323	In
Cpd3507	CHEMBL3955438	CC(C)(O)[C@@H](NC(=O)Nc1cc2[nH]nc(SC(F)(F)F)c2cn1)c3ccccc3	IC50	=	3	1	MAP kinase ERK2	Sub-train	1	0.195928	0.804072	In
Cpd3508	CHEMBL4109961	COc1cnn(Cc2nc(NC(=O)N[C@H](C)c3ccccc3)cc4[nH]nc(OC)c24)c1	IC50	=	23.4	1	MAP kinase ERK2	Test	1	0.149624	0.850376	In
Cpd3509	CHEMBL3680611	Fc1cc(CN2C=CC(=CC2=O)c3ccnc(NC4CCOCC4)n3)cc5[nH]ccc15	IC50	=	8.5	1	MAP kinase ERK2	Test	1	0.223126	0.776874	In
Cpd3510	CHEMBL4107419	COC[C@@H](NC(=O)Nc1cc2[nH]nc(OC(F)F)c2cn1)c3ccccc3	IC50	=	5.29	1	MAP kinase ERK2	Sub-train	1	0.0433246	0.956675	In
Cpd3511	CHEMBL4108108	COc1n[nH]c2cc(NC(=O)N[C@H](C)c3ccccc3)nc(CN4CCOCC4)c12	IC50	=	266.2	1	MAP kinase ERK2	Test	1	0.121943	0.878057	In
Cpd3512	CHEMBL4106935	COc1n[nH]c2cc(NC(=O)N[C@H](C)c3ccc(F)cc3)nc(CO)c12	IC50	=	2.5	1	MAP kinase ERK2	Sub-train	1	0.092709	0.907291	In
Cpd3513	CHEMBL4111959	COC[C@@H](NC(=O)Nc1cc2[nH]nc(Oc3ccccc3)c2cn1)c4ccccc4	IC50	=	167.7	1	MAP kinase ERK2	Sub-train	1	0.0117436	0.988256	In
Cpd3514	CHEMBL4108232	C[C@@H](NC(=O)Nc1cc2[nH]nc(N3CCCC3)c2cn1)c4ccccc4	IC50	=	0.82	1	MAP kinase ERK2	Sub-train	1	0.073008	0.926992	In
Cpd3515	CHEMBL4109990	COC[C@@H](NC(=O)Nc1cc2[nH]nc(N3CCOCC3)c2cn1)c4ccccc4	IC50	=	0.4	1	MAP kinase ERK2	Sub-train	1	0.0841959	0.915804	In
Cpd3516	CHEMBL4112784	CCNc1n[nH]c2cc(NC(=O)N[C@H](COC)c3ccc(F)cc3)ncc12	IC50	=	80.9	1	MAP kinase ERK2	Sub-train	1	0.0620401	0.93796	In
Cpd3517	CHEMBL4108211	Nc1ncc(cc1c2ccc(C(=O)N[C@H](CO)c3ccccc3)c(F)c2)C4CCOCC4	IC50	=	0.914	1	MAP kinase ERK2	Sub-train	1	0.0368982	0.963102	In
Cpd3518	CHEMBL3654876	CC(C)Oc1ccc(cn1)c2n[nH]c3cc(NC(=O)N[C@H](C)c4ccc(F)cc4)ncc23	IC50	=	2.358	1	MAP kinase ERK2	Test	1	0.0113842	0.988616	In
Cpd3519	CHEMBL3957670	Cc1nn(cc1c2cnc(N)c(c2)c3ccc(C(=O)N[C@H](CO)c4cc(F)cc(CF)c4)c(F)c3)C(F)F	IC50	=	0.0104	1	MAP kinase ERK2	Sub-train	1	0.0294011	0.970599	In
Cpd3520	CHEMBL3986390	CN1C[C@@H](NC(=O)c2ccc(cc2F)c3cc(cnc3N)c4cnn(C)c4)[C@@H](C1)c5ccc(F)c(Cl)c5	IC50	=	430	1	MAP kinase ERK2	Sub-train	1	0.0548554	0.945145	In
Cpd3521	CHEMBL4115289	NC[C@@H](NC(=O)c1ccc(cc1F)c2nc(cnc2N)C3CCCCC3)c4cccc(Cl)c4	IC50	=	0.0505	1	MAP kinase ERK2	Sub-train	1	0.0317585	0.968242	In
Cpd3522	CHEMBL4111027	Nc1ncc(nc1c2ccc(C(=O)N[C@H](CO)c3cc(F)cc(Br)c3)c(F)c2)C(=O)N4CCC(CO)CC4	IC50	=	9.68	1	MAP kinase ERK2	Sub-train	1	0.0492166	0.950783	In
Cpd3523	CHEMBL3926750	Nc1ncc(cc1c2ccc(C(=O)N[C@H](CO)c3ccccc3)c(F)c2)C4CNC(=O)C4	IC50	=	51	1	MAP kinase ERK2	Sub-train	1	0.0678015	0.932198	In
Cpd3525	CHEMBL4109965	COc1n[nH]c2cc(NC(=O)N[C@H](C)c3cccc(Cl)c3)nc([C@H](C)O)c12	IC50	=	13.7	1	MAP kinase ERK2	Sub-train	1	0.0819303	0.91807	In
Cpd3526	CHEMBL3895804	COC(=O)[C@@H](NC(=O)Nc1cc2c(cn1)c(OC)nn2C(c3ccccc3)(c4ccccc4)c5ccccc5)c6ccccc6	IC50	=	2.7	1	MAP kinase ERK2	Sub-train	1	0.328898	0.671102	In
Cpd3527	CHEMBL3947147	CC(C)(O)[C@@H](NC(=O)Nc1cc2[nH]nc(OCCO)c2c(CO)n1)c3ccccc3	IC50	=	0.5	1	MAP kinase ERK2	Sub-train	1	0.0764544	0.923546	In
Cpd3528	CHEMBL3936669	CC(C)(C)[C@@H](NC(=O)Nc1cc2[nH]nc(OCCO)c2cn1)c3ccccc3	IC50	=	189.9	1	MAP kinase ERK2	Sub-train	1	0.094402	0.905598	In
Cpd3529	CHEMBL4113181	CNc1n[nH]c2cc(NC(=O)N[C@H]([C@H]3CCCO3)c4ccccc4)ncc12	IC50	=	2.1	1	MAP kinase ERK2	Sub-train	1	0.0284215	0.971579	In
Cpd3530	CHEMBL4111101	C[C@@H](NC(=O)Nc1cc2[nH]nc(NC3CCCNC3)c2cn1)c4ccccc4	IC50	=	30.2	1	MAP kinase ERK2	Test	1	0.0320647	0.967935	In
Cpd3531	CHEMBL4112544	C[C@@H](NC(=O)Nc1cc2[nH]nc(NC3CNC3)c2cn1)c4ccccc4	IC50	=	31.7	1	MAP kinase ERK2	Sub-train	1	0.0359136	0.964086	In
Cpd3532	CHEMBL4107053	C[C@@H](NC(=O)Nc1cc2[nH]nc(NCC3CC(C3)C(=C)C)c2cn1)c4ccccc4	IC50	=	17.9	1	MAP kinase ERK2	Sub-train	1	0.0180997	0.9819	In
Cpd3533	CHEMBL3897845	CCNc1n[nH]c2cc(NC(=O)NC(CC)c3ccccn3)ncc12	IC50	=	33	1	MAP kinase ERK2	Test	1	0.0940717	0.905928	In
Cpd3534	CHEMBL3945978	COCC(NC(=O)Nc1cc2[nH]nc(OC)c2c(CO)n1)c3ccccn3	IC50	=	1378	-1	MAP kinase ERK2	Sub-train	1	0.201771	0.798229	In
Cpd3535	CHEMBL4112891	COC[C@@H](NC(=O)Nc1cc2[nH]nc(OC3CCC(CC3)OC)c2cn1)c4ccccc4	IC50	=	11.8	1	MAP kinase ERK2	Test	1	0.0346238	0.965376	In
Cpd3536	CHEMBL3409586	OC[C@@H](N1C=CC(=CC1=O)c2ccnc(NC3CCOCC3)n2)c4cccc(Cl)c4	IC50	=	35.7	1	MAP kinase ERK2	Sub-train	1	0.273471	0.726529	In
Cpd3537	CHEMBL3675716	CCc1nccc(Nc2nccc(n2)C3=CC(=O)N(C=C3)C(CO)c4ccc(Cl)c(F)c4)n1	IC50	=	13.7	1	MAP kinase ERK2	Sub-train	1	0.171967	0.828033	In
Cpd3538	CHEMBL3675717	FC(F)(F)Oc1ccc(CCN2C=CC(=CC2=O)c3ccnc(NC4CCOCC4)n3)cc1	IC50	=	8.7	1	MAP kinase ERK2	Sub-train	1	0.0527041	0.947296	In
Cpd3540	CHEMBL4112937	COC[C@@H](NC(=O)Nc1cc2[nH]nc(N3CCC(O)CC3)c2cn1)c4ccccc4	IC50	=	1.2	1	MAP kinase ERK2	Sub-train	1	0.0636106	0.936389	In
Cpd3541	CHEMBL4109997	COC[C@@H](NC(=O)Nc1cc2[nH]nc(OC3CCOCC3C)c2cn1)c4ccccc4	IC50	=	1.9	1	MAP kinase ERK2	Sub-train	1	0.0792736	0.920726	In
Cpd3543	CHEMBL3955988	Nc1ncc(cc1c2ccc(C(=O)N[C@H](CO)c3cccc(Cl)c3)c(F)c2)[C@H]4C[C@H]5COC(=O)N5C4	IC50	=	3.57	1	MAP kinase ERK2	Sub-train	1	0.00426168	0.995738	In
Cpd3544	CHEMBL3955974	C[C@@H](NC(=O)c1ccc(cc1F)c2cc(cnc2N)[C@@H]3CCN(C)C(=O)C3)c4cccc(Cl)c4	IC50	=	18.2	1	MAP kinase ERK2	Test	1	0.131466	0.868534	In
Cpd3545	CHEMBL3970161	CC(C)(O)[C@@H](NC(=O)Nc1cc2[nH]nc(N3CCOCC3)c2cn1)c4ccc(F)cc4	IC50	=	0.4	1	MAP kinase ERK2	Sub-train	1	0.0616327	0.938367	In
Cpd3546	CHEMBL4115556	OC[C@@H](NC(=O)Nc1cc2[nH]nc(N3CC4CCC(C3)O4)c2cn1)c5ccccc5	IC50	=	1.9	1	MAP kinase ERK2	Sub-train	1	0.0408969	0.959103	In
Cpd3547	CHEMBL4110072	CSC[C@@H](NC(=O)Nc1cc2[nH]nc(N)c2cn1)c3ccccc3	IC50	=	1.4	1	MAP kinase ERK2	Sub-train	1	0.0705855	0.929414	In
Cpd3548	CHEMBL3892625	Cn1cc(cn1)c2cnc(N)c(c2)c3ccc(C(=O)NCc4nccs4)c(F)c3	IC50	=	352	1	MAP kinase ERK2	Sub-train	1	0.149715	0.850285	In
Cpd3549	CHEMBL4108634	Cc1cc(ccc1C(=O)N[C@H](CO)c2ccccc2)c3cc(cnc3N)c4cnn(C)c4	IC50	=	1.08	1	MAP kinase ERK2	Sub-train	1	0.0772385	0.922761	In
Cpd3551	CHEMBL4106578	Cc1nn(cc1c2cnc(N)c(c2)c3ccc(C(=O)N[C@H](CO)c4cccc(Cl)c4)c(F)c3)C(F)F	IC50	=	0.0245	1	MAP kinase ERK2	Test	1	0.0236374	0.976363	In
Cpd3553	CHEMBL3928081	NC[C@@H](NC(=O)c1ccc(cc1F)c2nc(cnc2N)C3CCOCC3)c4cccc(Cl)c4	IC50	=	0.021	1	MAP kinase ERK2	Sub-train	1	0.0359407	0.964059	In
Cpd3554	CHEMBL3891311	Nc1ncc(nc1c2ccc(C(=O)NC(c3ccccc3)C(F)(F)F)c(F)c2)C4CCOCC4	IC50	=	27	1	MAP kinase ERK2	Sub-train	1	0.0313912	0.968609	In
Cpd3555	CHEMBL4110069	Nc1ncc(nc1c2ccc(cc2)C(=O)N3COC[C@@H]3c4ccccc4)C5CCOCC5	IC50	=	107	1	MAP kinase ERK2	Sub-train	1	0.0789318	0.921068	In
Cpd3556	CHEMBL4112014	COC(=O)N1CCC(CC1)c2cnc(N)c(n2)c3ccc(C(=O)N[C@H](CO)c4ccccc4)c(F)c3	IC50	=	3.61	1	MAP kinase ERK2	Sub-train	1	0.0569801	0.94302	In
Cpd3557	CHEMBL4114403	CC(=O)N1CCC(CC1)c2cnc(N)c(n2)c3ccc(C(=O)N[C@H](CO)c4ccccc4)c(F)c3	IC50	=	12.4	1	MAP kinase ERK2	Sub-train	1	0.210191	0.789809	In
Cpd3558	CHEMBL4109681	Nc1ncc(cc1c2ccc(C(=O)N[C@H](CO)c3ccccc3)c(F)c2)c4ccncc4	IC50	=	0.487	1	MAP kinase ERK2	Sub-train	1	0.0125387	0.987461	In
Cpd3559	CHEMBL4108272	Cc1ncc(c2cnc(N)c(c2)c3ccc(C(=O)N[C@H](CO)c4cccc(F)c4)c(F)c3)n1C	IC50	=	5.14	1	MAP kinase ERK2	Sub-train	1	0.032304	0.967696	In
Cpd3560	CHEMBL3917060	Nc1ncc(nc1c2ccc(C(=O)NCc3ccccc3)c(F)c2)C4CCC5(CC4)OCCO5	IC50	=	204	1	MAP kinase ERK2	Sub-train	1	0.0465081	0.953492	In
Cpd3561	CHEMBL4111888	Nc1ncc(nc1c2ccc(C(=O)N[C@H](CO)c3cc(F)cc(Br)c3)c(F)c2)C4CCCC(O)C4	IC50	=	0.0614	1	MAP kinase ERK2	Sub-train	1	0.0180646	0.981935	In
Cpd3562	CHEMBL4109398	CS(=O)(=O)c1cccc(c1)[C@@H](CO)NC(=O)c2ccc(cc2F)c3nc(cnc3N)C4CC4	IC50	=	1.79	1	MAP kinase ERK2	Sub-train	1	0.171508	0.828492	In
Cpd3563	CHEMBL4113197	Cc1cccc(c1)[C@@H](CO)NC(=O)c2ccc(cc2F)c3cc(cnc3N)c4cn(C)nc4C	IC50	=	0.169	1	MAP kinase ERK2	Sub-train	1	0.0501588	0.949841	In
Cpd3566	CHEMBL4112261	C[C@@H](NC(=O)Nc1cc2[nH]nc(N3CC(CO)C3)c2cn1)c4ccccc4	IC50	=	2.7	1	MAP kinase ERK2	Test	1	0.0662432	0.933757	In
Cpd3567	CHEMBL3892850	Nc1ncc(cc1c2ccc(C(=O)NCc3cnccn3)c(F)c2)C4CCOCC4	IC50	=	1220	-1	MAP kinase ERK2	Sub-train	1	0.0887591	0.911241	In
Cpd3568	CHEMBL3913726	COCCNC(=O)Nc1cc2[nH]nc(N3CCC3)c2cn1	IC50	=	255.2	1	MAP kinase ERK2	Sub-train	1	0.464774	0.535226	In
Cpd3569	CHEMBL3577563	COc1cccc(c1)N2C(=O)\C(=C\c3ccc(OCC(=O)Nc4ccccc4)cc3)\N=C2c5ccccc5	IC50	=	54	1	MAP kinase ERK2	Sub-train	1	0.397906	0.602094	In
Cpd3570	CHEMBL3628371	Nc1ccc(cn1)c2c[nH]c3ncc(nc23)c4ccncc4	IC50	=	468	1	MAP kinase ERK2	Sub-train	-1	0.769134	0.230866	In
Cpd3571	CHEMBL3628380	OCCCn1cc(cn1)c2c[nH]c3ncc(nc23)c4ccncc4	IC50	=	623	-1	MAP kinase ERK2	Sub-train	-1	0.908275	0.0917252	In
Cpd3572	CHEMBL3628383	C(c1ccccc1)n2cc(cn2)c3c[nH]c4ncc(nc34)c5ccncc5	IC50	=	37	1	MAP kinase ERK2	Sub-train	-1	0.631465	0.368535	In
Cpd3574	CHEMBL3628381	C(Cn1cc(cn1)c2c[nH]c3ncc(nc23)c4ccncc4)N5CCOCC5	IC50	=	416	1	MAP kinase ERK2	Sub-train	-1	0.901564	0.0984359	In
Cpd3575	CHEMBL3398592	Oc1ccc(NC(=O)[C@@H]2CCN(CC(=O)N3CCN(CC3)c4ccc(cc4)c5ccc(F)cc5)C2)cc1Cl	IC50	=	100000	-1	MAP kinase ERK2	Test	1	0.276607	0.723393	In
Cpd3579	CHEMBL4107301	C[C@@H](NC(=O)Nc1cc2[nH]nc(NC(=O)N[C@H](C)c3ccc(Cl)nc3)c2cn1)c4ccc(Cl)nc4	IC50	=	134	1	MAP kinase ERK2	Sub-train	1	0.0090456	0.990954	In
Cpd3580	CHEMBL3909437	COC[C@H](NC(=O)Nc1cc2[nH]nc(OC)c2cn1)c3ccc(F)cc3	IC50	=	10.4	1	MAP kinase ERK2	Sub-train	1	0.0541826	0.945817	In
Cpd3581	CHEMBL4114392	COc1n[nH]c2cc(NC(=O)N[C@@H]([C@H]3CCCO3)c4ccccc4)ncc12	IC50	=	378.2	1	MAP kinase ERK2	Sub-train	1	0.0388894	0.961111	In
Cpd3582	CHEMBL3923334	CCOc1n[nH]c2cc(NC(=O)NCc3ccc(F)cc3)ncc12	IC50	=	30.29	1	MAP kinase ERK2	Sub-train	1	0.0562921	0.943708	In
Cpd3583	CHEMBL4115071	COCCOC[C@@H](NC(=O)Nc1cc2[nH]nc(OC)c2cn1)c3ccccc3	IC50	=	12.8	1	MAP kinase ERK2	Sub-train	1	0.0500621	0.949938	In
Cpd3584	CHEMBL3948992	O=C(NC1CCCOc2ccccc12)Nc3cc4[nH]nc(OC5CCOCC5)c4cn3	IC50	=	0.6	1	MAP kinase ERK2	Sub-train	1	0.0458322	0.954168	In
Cpd3585	CHEMBL4108924	OCc1nc(NC(=O)N[C@@H](c2ccccc2)C3(O)CCC3)cc4[nH]nc(OCC(F)F)c14	IC50	=	0.7	1	MAP kinase ERK2	Sub-train	1	0.0228783	0.977122	In
Cpd3586	CHEMBL4110972	COc1n[nH]c2cc(NC(=O)N[C@H](c3ccccc3)C4(O)CCC4)nc(CO)c12	IC50	=	2743	-1	MAP kinase ERK2	Sub-train	1	0.0464865	0.953513	In
Cpd3587	CHEMBL4111598	CCOCCOc1n[nH]c2cc(NC(=O)N[C@@H](c3ccccc3)C4(O)CCC4)ncc12	IC50	=	2.4	1	MAP kinase ERK2	Sub-train	1	0.0285801	0.97142	In
Cpd3588	CHEMBL4115528	CCOc1n[nH]c2cc(NC(=O)N[C@H](COC)c3cccc(C)n3)ncc12	IC50	=	135.8	1	MAP kinase ERK2	Test	1	0.0895138	0.910486	In
Cpd3590	CHEMBL1521	CCN(C(=O)C)c1cccc(c1)c2ccnc3c(cnn23)C#N	IC50	=	Not Active	-1	MAP kinase ERK2	Sub-train	-1	0.888706	0.111294	In
Cpd3593	CHEMBL4107037	Cc1ncc(c2cnc(N)c(c2)c3ccc(C(=O)N[C@H](CO)c4cccc(Cl)c4)c(F)c3)n1C	IC50	=	0.487	1	MAP kinase ERK2	Sub-train	1	0.0212103	0.97879	In
Cpd3594	CHEMBL4114858	Cc1nn(C)cc1c2cnc(N)c(c2)c3ccc(C(=O)N[C@H](CO)c4ccccc4)c(F)c3	IC50	=	1.41	1	MAP kinase ERK2	Sub-train	1	0.059518	0.940482	In
Cpd3596	CHEMBL3902203	CN1C[C@H](CC1=O)c2cnc(N)c(c2)c3ccc(C(=O)N[C@H](CO)c4cccc(Cl)c4)c(F)c3	IC50	=	5.32	1	MAP kinase ERK2	Sub-train	1	0.0775739	0.922426	In
Cpd3597	CHEMBL3926307	Nc1nccnc1c2ccc(cc2)C(=O)NCc3ccccc3	IC50	=	4790	-1	MAP kinase ERK2	Test	1	0.0823603	0.91764	In
Cpd3598	CHEMBL4113120	C[C@@H](NC(=O)c1ccc(cc1F)c2nc(cnc2N)C3CCOCC3)c4ccccc4	IC50	=	0.818	1	MAP kinase ERK2	Sub-train	1	0.071198	0.928802	In
Cpd3599	CHEMBL4110638	CCn1cc(cn1)c2cnc(N)c(c2)c3ccc(C(=O)N[C@H](CO)c4cccc(Cl)c4)c(F)c3	IC50	=	0.153	1	MAP kinase ERK2	Test	1	0.0372296	0.96277	In
Cpd3600	CHEMBL4112674	CCn1cc(cn1)c2cnc(N)c(c2)c3ccc(C(=O)N[C@H](CO)c4cccc(F)c4)c(F)c3	IC50	=	1.95	1	MAP kinase ERK2	Sub-train	1	0.0562975	0.943703	In
Cpd3601	CHEMBL4114856	CCn1cc(cn1)c2cnc(N)c(c2)c3ccc(C(=O)N[C@H](C)c4cccc(c4)S(=O)(=O)C)c(F)c3	IC50	=	3.57	1	MAP kinase ERK2	Sub-train	1	0.181109	0.818891	In
Cpd3602	CHEMBL3939292	Cn1cc(cn1)c2cnc(N)c(c2)c3ccc(C(=O)NC(CN)c4cccc(Cl)c4)c(F)c3	IC50	=	0.2	1	MAP kinase ERK2	Test	1	0.0434865	0.956514	In
Cpd3603	CHEMBL3896812	CS(=O)(=O)c1cc(F)cc(CNC(=O)c2ccc(cc2F)c3nc(cnc3N)C4CCOCC4)c1	IC50	=	0.242	1	MAP kinase ERK2	Sub-train	1	0.192194	0.807806	In
Cpd3604	CHEMBL64	NNC(=O)c1ccncc1	IC50	=	Not Active	-1	MAP kinase ERK2	Sub-train	-1	0.621535	0.378465	In
Cpd3605	CHEMBL4110675	C[C@@H](NC(=O)c1ccc(cc1F)c2nc(cnc2N)[C@@H]3CC[C@H](O)CC3)c4cc(F)cc(c4)S(=O)(=O)C	IC50	=	1.95	1	MAP kinase ERK2	Sub-train	1	0.12794	0.87206	In
Cpd3606	CHEMBL3658730	Cc1cc(ccn1)c2n[nH]c3cc(NC(=O)NCc4cccc(NS(=O)(=O)C)c4)ncc23	IC50	=	0.3398	1	MAP kinase ERK2	Test	1	0.156422	0.843578	In
Cpd3607	CHEMBL3976291	Nc1ncc(cc1c2ccc(cc2)C(=O)NCc3cccnc3)C4CCOCC4	IC50	=	887	-1	MAP kinase ERK2	Sub-train	1	0.0852488	0.914751	In
[truncated: 2,482 more rows]

## Sheet: External validation set
Cpd	Molecule ChEMBL ID	Smiles	me	Standard Relation	Standard Value	IAi(cj)	bt	Set	Pred IAi(cj)_LDA	PosteriorProbability(-1)	PosteriorProbability(1)	AD status
Cpd0007	CHEMBL1254007	Cn1ccc2ncnc(Oc3ccc(NC(=O)Nc4cccc(c4)C(F)(F)F)c(F)c3)c12	IC50	>	10000	-1	MAP kinase ERK1	Ext Val	1	0.0252	0.9748	In
Cpd0009	CHEMBL372464	COc1ccc(Nc2nc(Nc3ccc4[nH]cnc4c3)ncc2C(F)(F)F)cc1	IC50	>	1000	-1	MAP kinase ERK1	Ext Val	1	0.3418	0.6582	In
Cpd0012	CHEMBL259060	COC(=O)C1=C(c2ccccc2)c3cc(Br)ccc3C(=O)N1Cc4ccc(cc4)S(=O)(=O)C	IC50	>	11000	-1	MAP kinase ERK1	Ext Val	1	0.363	0.637	In
Cpd0016	CHEMBL480	Cc1c(OCC(F)(F)F)ccnc1C[S+]([O-])c2nc3ccccc3[nH]2	IC50	=	Not Active	-1	MAP kinase ERK1	Ext Val	-1	0.5792	0.4208	In
Cpd0028	CHEMBL213618	CNc1nccc(n1)c2ccc(s2)C(=O)N[C@H](CN)Cc3ccc(Cl)cc3Cl	IC50	=	400	1	MAP kinase ERK1	Ext Val	1	0.3274	0.6726	In
Cpd0038	CHEMBL806	CC(C)C(=O)Nc1ccc(c(c1)C(F)(F)F)[N+](=O)[O-]	IC50	=	Not Active	-1	MAP kinase ERK1	Ext Val	-1	0.9806	0.0194	In
Cpd0043	CHEMBL56367	CS(=O)(=O)Nc1ccc(cc1Oc2ccccc2)[N+](=O)[O-]	IC50	=	Not Active	-1	MAP kinase ERK1	Ext Val	-1	0.955	0.045	In
Cpd0050	CHEMBL510139	C[C@H]1OC=C2C(=C(C(=O)O)C(=O)C(=C2[C@@H]1C)C)O	IC50	=	Not Active	-1	MAP kinase ERK1	Ext Val	-1	0.9995	0.0005	In
Cpd0056	CHEMBL34139	C[C@H]([C@](O)(Cn1cncn1)c2ccc(F)cc2F)S(=O)(=O)C	IC50	=	Not Active	-1	MAP kinase ERK1	Ext Val	-1	0.9984	0.0016	In
Cpd0058	CHEMBL3577633	COc1cccc(c1)N2C(=O)\C(=C\c3ccc(OCC(=O)Nc4ccccc4Cl)cc3)\N=C2c5ccccc5	IC50	=	87	1	MAP kinase ERK1	Ext Val	1	0.3632	0.6368	In
Cpd0062	CHEMBL3577641	COc1ccc(cc1)N2C(=O)\C(=C\c3ccc(OCC(=O)Nc4cccc(OC)c4)cc3)\N=C2c5ccccc5	IC50	=	21	1	MAP kinase ERK1	Ext Val	1	0.4683	0.5317	In
Cpd0075	CHEMBL407	CCOC(=O)c1ncn2c1CN(C)C(=O)c3cc(F)ccc23	IC50	=	Not Active	-1	MAP kinase ERK1	Ext Val	-1	0.9935	0.0065	In
Cpd0076	CHEMBL1191	Cc1nnc(NS(=O)(=O)c2ccc(N)cc2)s1	IC50	=	Not Active	-1	MAP kinase ERK1	Ext Val	-1	0.9926	0.0074	In
Cpd0079	CHEMBL1243326	CNc1nccc(n1)c2cccnc2Oc3ccc(Nc4nnc(c5ccc(F)cc5)c6ccccc46)cc3	IC50	>	25000	-1	MAP kinase ERK1	Ext Val	1	0.0339	0.9661	In
Cpd0080	CHEMBL2031893	COc1cc2nccc(Oc3ccc(NC(=O)C4=C(C)N(C)N(C4=O)c5ccccc5)cc3F)c2cc1OC	IC50	=	25000	-1	MAP kinase ERK1	Ext Val	-1	0.7152	0.2848	In
Cpd0084	CHEMBL422	CN1CCN(CCCN2c3ccccc3Sc4ccc(cc24)C(F)(F)F)CC1	IC50	=	Not Active	-1	MAP kinase ERK1	Ext Val	-1	0.9935	0.0065	In
Cpd0087	CHEMBL241694	C[C@]12CCC(=O)C=C1CC[C@@H]3[C@@H]2CC[C@@]4(C)[C@H]3CC[C@@]4(O)C#C	IC50	=	Not Active	-1	MAP kinase ERK1	Ext Val	-1	0.9603	0.0397	In
Cpd0088	CHEMBL559147	C[C@@H](N)[C@@H]1CC[C@H](CC1)C(=O)Nc2ccncc2	IC50	=	Not Active	-1	MAP kinase ERK1	Ext Val	-1	0.6851	0.3149	In
Cpd0089	CHEMBL1200993	[I-].[I-].[I-].CC[N+](CC)(CC)CCOc1cccc(OCC[N+](CC)(CC)CC)c1OCC[N+](CC)(CC)CC	IC50	=	Not Active	-1	MAP kinase ERK1	Ext Val	-1	1	0	Outlier
Cpd0092	CHEMBL1200545	C[C@H]1C[C@H]2[C@@H]3C[C@H](F)C4=CC(=O)C=C[C@]4(C)[C@@]3(F)[C@@H](O)C[C@]2(C)[C@@]1(OC(=O)C)C(=O)COC(=O)C	IC50	=	Not Active	-1	MAP kinase ERK1	Ext Val	-1	0.9882	0.0118	In
Cpd0093	CHEMBL632	C[C@H]1C[C@H]2[C@@H]3CCC4=CC(=O)C=C[C@]4(C)[C@@]3(F)[C@@H](O)C[C@]2(C)[C@@]1(O)C(=O)CO	IC50	=	Not Active	-1	MAP kinase ERK1	Ext Val	-1	0.9907	0.0093	In
Cpd0094	CHEMBL1754	CCN1CC(CCN2CCOCC2)C(C1=O)(c3ccccc3)c4ccccc4	IC50	=	Not Active	-1	MAP kinase ERK1	Ext Val	-1	0.9956	0.0044	In
Cpd0095	CHEMBL1255834	CC(N)Cc1c[nH]c2ccc(OCc3cccs3)cc12	IC50	=	Not Active	-1	MAP kinase ERK1	Ext Val	-1	0.9729	0.0271	In
Cpd0096	CHEMBL1201193	CCCCN1CCCC[C@H]1C(=O)Nc2c(C)cccc2C	IC50	=	Not Active	-1	MAP kinase ERK1	Ext Val	-1	0.9637	0.0363	In
Cpd0097	CHEMBL1167	CN[C@@H]1[C@H](O)[C@H](NC)[C@H]2O[C@]3(O)[C@@H](O[C@H](C)CC3=O)O[C@@H]2[C@H]1O	IC50	=	Not Active	-1	MAP kinase ERK1	Ext Val	-1	0.9985	0.0015	In
Cpd0098	CHEMBL1738710	Cc1ccc(cc1N2C=NC(=C(Cl)C2=O)OCc3ccc(F)cc3F)C(=O)NCCO	IC50	>	10000	-1	MAP kinase ERK1	Ext Val	-1	0.987	0.013	In
Cpd0099	CHEMBL437002	Fc1ccccc1C(=O)N2CCC(Cc3ccccc3)CC2	IC50	=	Not Active	-1	MAP kinase ERK1	Ext Val	-1	0.7439	0.2561	In
Cpd0101	CHEMBL195437	CCCCCCCCc1ccc(O)cc1	IC50	=	Not Active	-1	MAP kinase ERK1	Ext Val	-1	0.9844	0.0156	In
Cpd0102	CHEMBL2105617	CCC1C2CC3C4N(C)c5ccccc5C46CC(C2[C@H]6O)N3C1O	IC50	=	Not Active	-1	MAP kinase ERK1	Ext Val	-1	0.9949	0.0051	In
Cpd0105	CHEMBL467	NC(=O)NO	IC50	=	Not Active	-1	MAP kinase ERK1	Ext Val	-1	0.994	0.006	Outlier
Cpd0107	CHEMBL1370	CCCC1O[C@@H]2C[C@H]3[C@@H]4CCC5=CC(=O)C=C[C@]5(C)[C@H]4[C@@H](O)C[C@]3(C)[C@@]2(O1)C(=O)CO	IC50	=	Not Active	-1	MAP kinase ERK1	Ext Val	-1	0.9942	0.0058	In
Cpd0109	CHEMBL2409778	Cc1cc(C(=O)Nc2cc(Oc3ccc4nc(NC(=O)C5CC5)nn4c3)ccc2F)n(C)n1	IC50	>	10000	-1	MAP kinase ERK1	Ext Val	-1	0.5492	0.4508	In
Cpd0110	CHEMBL409429	COC(=O)C1=C(c2ccccc2)c3cc(Br)ccc3C(=O)N1CCCc4ccccc4	IC50	>	1100	-1	MAP kinase ERK1	Ext Val	-1	0.9263	0.0737	In
Cpd0112	CHEMBL44814	ClC(Cl)(Cl)Cl	IC50	=	Not Active	-1	MAP kinase ERK1	Ext Val	-1	1	0	Outlier
Cpd0113	CHEMBL1201216	Cc1ccccc1N2CCN(CCc3nnc4CCCCn34)CC2	IC50	=	Not Active	-1	MAP kinase ERK1	Ext Val	-1	0.87	0.13	In
Cpd0114	CHEMBL410295	CN1CCN(CC1)c2ccc(Nc3ncc4C(=O)N(c5c(C)cccc5C)c6nc7ccccc7n6c4n3)cc2	IC50	>	100000	-1	MAP kinase ERK1	Ext Val	1	0.2386	0.7614	In
Cpd0115	CHEMBL41	CNCCC(Oc1ccc(cc1)C(F)(F)F)c2ccccc2	IC50	=	Not Active	-1	MAP kinase ERK1	Ext Val	-1	0.9216	0.0784	In
Cpd0116	CHEMBL1087	CN1CCCCC1C(=O)Nc2c(C)cccc2C	IC50	=	Not Active	-1	MAP kinase ERK1	Ext Val	-1	0.9723	0.0277	In
Cpd0119	CHEMBL1110	Cc1[nH]cnc1CN2CCc3c(C2=O)c4ccccc4n3C	IC50	=	Not Active	-1	MAP kinase ERK1	Ext Val	-1	0.9793	0.0207	In
Cpd0121	CHEMBL940	NCC1(CC(=O)O)CCCCC1	IC50	=	Not Active	-1	MAP kinase ERK1	Ext Val	-1	0.9986	0.0014	In
Cpd0122	CHEMBL178455	COc1cc2nccc(Oc3ccc(NC(=O)Nc4ccc(F)cc4F)c(F)c3)c2cc1OC	IC50	>	10000	-1	MAP kinase ERK1	Ext Val	1	0.0393	0.9607	In
Cpd0123	CHEMBL1909076	N[C@H](CSC(=S)NCc1ccccc1)C(=O)O	IC50	=	Not Active	-1	MAP kinase ERK1	Ext Val	-1	0.9995	0.0005	In
Cpd0124	CHEMBL268291	CN(C)C=O	IC50	=	Not Active	-1	MAP kinase ERK1	Ext Val	-1	0.9999	0.0001	Outlier
Cpd0125	CHEMBL2252949	CC1(C)[C@H]2CC[C@]1(C)C(=O)C2	IC50	=	Not Active	-1	MAP kinase ERK1	Ext Val	-1	0.9984	0.0016	In
Cpd0126	CHEMBL1089119	FC(F)(F)c1ccc(Nc2ccnc3nc(ccc23)c4ncccc4C(F)(F)F)nc1	IC50	=	980	-1	MAP kinase ERK1	Ext Val	1	0.3894	0.6106	In
Cpd0127	CHEMBL19019	Oc1ccc2C[C@H]3N(CC4CC4)CC[C@@]56[C@@H](Oc1c25)C(=O)CC[C@@]36O	IC50	=	Not Active	-1	MAP kinase ERK1	Ext Val	-1	0.9975	0.0025	In
Cpd0129	CHEMBL1149	C[N+](C)(C)C[C@H](O)CC(=O)[O-]	IC50	=	Not Active	-1	MAP kinase ERK1	Ext Val	-1	0.9999	0.0001	In
Cpd0130	CHEMBL1201237	CC(C)(C)NC[C@H](O)COc1cccc2C(=O)CCCc12	IC50	=	Not Active	-1	MAP kinase ERK1	Ext Val	-1	0.9736	0.0264	In
Cpd0131	CHEMBL1009	N[C@@H](Cc1ccc(O)c(O)c1)C(=O)O	IC50	=	Not Active	-1	MAP kinase ERK1	Ext Val	-1	0.9705	0.0295	In
Cpd0132	CHEMBL1419	CC(C)CC(N(C)C)C1(CCC1)c2ccc(Cl)cc2	IC50	=	Not Active	-1	MAP kinase ERK1	Ext Val	-1	0.9975	0.0025	In
Cpd0134	CHEMBL1243200	CNc1nccc(n1)c2cccnc2Oc3ccc(NC(=O)c4ccccc4Nc5ccccc5)cc3	IC50	>	1000	-1	MAP kinase ERK1	Ext Val	1	0.0083	0.9917	In
Cpd0135	CHEMBL404	C[C@]1(Cn2ccnn2)[C@@H](N3[C@@H](CC3=O)S1(=O)=O)C(=O)O	IC50	=	Not Active	-1	MAP kinase ERK1	Ext Val	-1	0.9996	0.0004	In
Cpd0136	CHEMBL1539	COc1ncnc(NS(=O)(=O)c2ccc(N)cc2)c1OC	IC50	=	Not Active	-1	MAP kinase ERK1	Ext Val	-1	0.977	0.023	In
Cpd0137	CHEMBL444633	CO[C@H]1\C=C\O[C@@]2(C)Oc3c(C)c(O)c4C(=O)C(=C5NC6(CCN(CC(C)C)CC6)N=C5c4c3C2=O)NC(=O)\C(=C/C=C/[C@H](C)[C@H](O)[C@@H](C)[C@@H](O)[C@@H](C)[C@H](OC(=O)C)[C@@H]1C)\C	IC50	=	Not Active	-1	MAP kinase ERK1	Ext Val	-1	0.9983	0.0017	In
Cpd0139	CHEMBL316561	CCCN(CCC)C(=O)C(CCC(=O)O)NC(=O)c1ccccc1	IC50	=	Not Active	-1	MAP kinase ERK1	Ext Val	-1	0.9973	0.0027	In
Cpd0141	CHEMBL856	CCC1(C(=O)NCNC1=O)c2ccccc2	IC50	=	Not Active	-1	MAP kinase ERK1	Ext Val	-1	0.998	0.002	In
Cpd0142	CHEMBL1454946	COC(=O)Nc1nc2cc(ccc2[nH]1)C(=O)c3ccc(F)cc3	IC50	=	Not Active	-1	MAP kinase ERK1	Ext Val	1	0.499	0.501	In
Cpd0143	CHEMBL252556	COC1=C(OC)C(=O)C(=C(C)C1=O)CCCCCCCCCCO	IC50	=	Not Active	-1	MAP kinase ERK1	Ext Val	-1	0.9923	0.0077	In
Cpd0145	CHEMBL21	Nc1ccc(cc1)S(=O)(=O)N	IC50	=	Not Active	-1	MAP kinase ERK1	Ext Val	-1	0.9204	0.0796	In
Cpd0146	CHEMBL38737	CC(=N)S	IC50	=	Not Active	-1	MAP kinase ERK1	Ext Val	-1	0.9998	0.0002	In
Cpd0149	CHEMBL880	CC(=O)OCC(CCn1cnc2cnc(N)nc12)COC(=O)C	IC50	=	Not Active	-1	MAP kinase ERK1	Ext Val	-1	0.9777	0.0223	In
Cpd0151	CHEMBL31	COc1c(N2CCNC(C)C2)c(F)cc3C(=O)C(=CN(C4CC4)c13)C(=O)O	IC50	=	Not Active	-1	MAP kinase ERK1	Ext Val	-1	0.9983	0.0017	In
Cpd0153	CHEMBL1103	[O-][N+](=O)c1oc(\C=N\N2CCOC2=O)cc1	IC50	=	Not Active	-1	MAP kinase ERK1	Ext Val	-1	0.8618	0.1382	In
Cpd0157	CHEMBL1554	CC(C)[C@H]1NC(=O)[C@@H](NC(=O)C2=C(N)C(=O)C(=C3Oc4c(C)ccc(C(=O)N[C@H]5[C@@H](C)OC(=O)[C@H](C(C)C)N(C)C(=O)CN(C)C(=O)[C@@H]6CCCN6C(=O)[C@H](NC5=O)C(C)C)c4N=C23)C)[C@@H](C)OC(=O)[C@H](C(C)C)N(C)C(=O)CN(C)C(=O)[C@@H]7CCCN7C1=O	IC50	=	Not Active	-1	MAP kinase ERK1	Ext Val	-1	0.999	0.001	Outlier
Cpd0158	CHEMBL1144	CC[C@H](C)C(=O)O[C@H]1C[C@H](O)C=C2C=C[C@H](C)[C@H](CC[C@@H](O)C[C@@H](O)CC(=O)O)[C@@H]12	IC50	=	Not Active	-1	MAP kinase ERK1	Ext Val	-1	0.9969	0.0031	In
Cpd0162	CHEMBL3544964	Cn1nccc1Nc2nccc(n2)C3=CC(=O)N(C=C3)[C@H](CO)c4ccc(Cl)c(F)c4	IC50	=	1.2	1	MAP kinase ERK1	Ext Val	1	0.4434	0.5566	In
Cpd0169	CHEMBL181	CC1=NS(=O)(=O)c2cc(Cl)ccc2N1	IC50	=	Not Active	-1	MAP kinase ERK1	Ext Val	-1	0.9874	0.0126	In
Cpd0173	CHEMBL1071	OC(=O)CCc1oc(c2ccccc2)c(n1)c3ccccc3	IC50	=	Not Active	-1	MAP kinase ERK1	Ext Val	-1	0.9287	0.0713	In
Cpd0175	CHEMBL1566249	CCOC(=O)OC(C)OC1=C(N(C)S(=O)(=O)c2ccccc12)C(=O)Nc3ccccn3	IC50	=	Not Active	-1	MAP kinase ERK1	Ext Val	-1	0.9812	0.0188	Outlier
Cpd0177	CHEMBL469912	COc1ccc(C[C@H](N)C(=O)N[C@@H]2[C@@H](CO)O[C@H]([C@@H]2O)n3cnc4c(ncnc34)N(C)C)cc1	IC50	=	Not Active	-1	MAP kinase ERK1	Ext Val	-1	0.6554	0.3446	In
Cpd0178	CHEMBL611	COc1cc2nc(nc(N)c2cc1OC)N3CCN(CC3)C(=O)C4CCCO4	IC50	=	Not Active	-1	MAP kinase ERK1	Ext Val	-1	0.8747	0.1253	In
Cpd0179	CHEMBL1517	CN(C)[C@H]1[C@@H]2[C@@H](O)[C@H]3C(=C(O)[C@]2(O)C(=O)C(=C1O)C(=O)N)C(=O)c4c(O)cccc4[C@@]3(C)O	IC50	=	Not Active	-1	MAP kinase ERK1	Ext Val	-1	0.9983	0.0017	In
Cpd0183	CHEMBL403	CC1(C)[C@@H](N2[C@@H](CC2=O)S1(=O)=O)C(=O)O	IC50	=	Not Active	-1	MAP kinase ERK1	Ext Val	-1	0.9985	0.0015	In
Cpd0184	CHEMBL277100	CC1CN(CCN1)c2cc3N(C=C(C(=O)O)C(=O)c3cc2F)c4ccc(F)cc4F	IC50	=	Not Active	-1	MAP kinase ERK1	Ext Val	-1	0.9836	0.0164	In
Cpd0189	CHEMBL488025	CC1=C(CC(=O)O)c2cc(F)ccc2/C/1=C\c3ccc(cc3)S(=O)(=O)C	IC50	=	Not Active	-1	MAP kinase ERK1	Ext Val	1	0.09	0.91	In
Cpd0195	CHEMBL1618305	Oc1ccc2C[C@H]3N(CC=C)CC[C@@]45[C@@H](Oc1c24)\C(=N\N=C\6/CC[C@@]7(O)[C@H]8Cc9ccc(O)c%10O[C@@H]6[C@]7(CCN8CC=C)c9%10)\CC[C@@]35O	IC50	=	Not Active	-1	MAP kinase ERK1	Ext Val	-1	0.5939	0.4061	In
Cpd0205	CHEMBL2347053	[O-][N+](=O)c1ccccc1c2n[nH]cc2\C=C\3/C(=O)Nc4ccccc34	IC50	=	1146	-1	MAP kinase ERK1	Ext Val	-1	0.6374	0.3626	In
Cpd0206	CHEMBL80	Oc1ccc2C[C@H]3N(CC=C)CC[C@@]45[C@@H](Oc1c24)C(=O)CC[C@@]35O	IC50	=	Not Active	-1	MAP kinase ERK1	Ext Val	-1	0.9975	0.0025	In
Cpd0211	CHEMBL505896	COc1cc2c(Oc3ccc(cc3F)C4=CN=C(Cc5ccccc5)N(C)C4=O)ccnc2cc1OCCCN6CCOCC6	IC50	>	100000	-1	MAP kinase ERK1	Ext Val	1	0.1233	0.8767	In
Cpd0212	CHEMBL23254	CC(C)[C@H](CO)Nc1nc(Nc2ccc(C(=O)O)c(Cl)c2)c3ncn(C(C)C)c3n1	IC50	=	3333	-1	MAP kinase ERK1	Ext Val	-1	0.6277	0.3723	In
Cpd0213	CHEMBL319556	Fc1ccc(c(F)c1)c2cc(cc3N(C(=O)NCc23)c4c(Cl)cccc4Cl)C5CCNCC5	IC50	>	10000	-1	MAP kinase ERK1	Ext Val	1	0.4307	0.5693	In
Cpd0222	CHEMBL376180	Nc1nc(N)c2nc(CNc3ccc(cc3)C(=O)N[C@@H](CCC(=O)O)C(=O)O)cnc2n1	IC50	=	Not Active	-1	MAP kinase ERK1	Ext Val	-1	0.5668	0.4332	In
Cpd0226	CHEMBL195641	FC(F)(F)c1cnc(Nc2ccc(NC#N)c(NC#N)c2)nc1Nc3ccc4[nH]cnc4c3	IC50	=	300	1	MAP kinase ERK1	Ext Val	1	0.4717	0.5283	In
Cpd0227	CHEMBL3577644	COc1ccc(cc1)N2C(=O)\C(=C\c3ccc(OCC(=O)Nc4cccc(Cl)c4)cc3)\N=C2c5ccccc5	IC50	=	35	1	MAP kinase ERK1	Ext Val	1	0.344	0.656	In
Cpd0230	CHEMBL56337	C\C(=C/c1ccccc1)\C=C\2/SC(=S)N(CC(=O)O)C2=O	IC50	=	Not Active	-1	MAP kinase ERK1	Ext Val	-1	0.9975	0.0025	In
Cpd0237	CHEMBL81977	NC(=O)c1cccc(N)c1	IC50	=	Not Active	-1	MAP kinase ERK1	Ext Val	-1	0.9705	0.0295	In
Cpd0238	CHEMBL723	COc1ccccc1OCCNCC(O)COc2cccc3[nH]c4ccccc4c23	IC50	=	Not Active	-1	MAP kinase ERK1	Ext Val	-1	0.9214	0.0786	In
Cpd0239	CHEMBL105	CO[C@]12[C@H]3N[C@H]3CN1C4=C([C@H]2COC(=O)N)C(=O)C(=C(C)C4=O)N	IC50	=	Not Active	-1	MAP kinase ERK1	Ext Val	-1	0.9927	0.0073	In
Cpd0243	CHEMBL942	CC(=O)Oc1ccc(cc1)C(c2ccc(OC(=O)C)cc2)c3ccccn3	IC50	=	Not Active	-1	MAP kinase ERK1	Ext Val	1	0.0893	0.9107	In
Cpd0246	CHEMBL128	CNS(=O)(=O)Cc1ccc2[nH]cc(CCN(C)C)c2c1	IC50	=	Not Active	-1	MAP kinase ERK1	Ext Val	-1	0.964	0.036	In
Cpd0247	CHEMBL10	C[S+]([O-])c1ccc(cc1)c2nc(c3ccc(F)cc3)c([nH]2)c4ccncc4	IC50	=	Not Active	-1	MAP kinase ERK1	Ext Val	1	0.274	0.726	In
Cpd0248	CHEMBL1236282	CS(=O)(=O)c1ccc(cc1)[C@@H](O)[C@@H](CO)NC(=O)C(Cl)Cl	IC50	=	Not Active	-1	MAP kinase ERK1	Ext Val	-1	0.6233	0.3767	In
Cpd0256	CHEMBL1242977	CNc1nccc(n1)c2cccnc2Oc3ccc(NC(=O)c4cccc(c4)C(F)(F)F)cc3C	IC50	>	8000	-1	MAP kinase ERK1	Ext Val	1	0.0388	0.9612	In
Cpd0260	CHEMBL1744448	[Br-].CC(O)[C@H](NC(=O)[C@@H](C)[C@@H](O)[C@@H](C)NC(=O)[C@@H](NC(=O)c1cc(N)nc(n1)C(CC(=O)N)NCC(N)C(=O)N)C(O[C@@H]2O[C@@H](CO)[C@@H](O)[C@H](O)[C@@H]2O[C@H]3O[C@H](CO)[C@@H](O)[C@H](OC(=O)N)[C@@H]3O)c4c[nH]cn4)C(=O)NCCc5nc(cs5)c6nc(cs6)C(=O)NCCC[S+](C)C	IC50	=	Not Active	-1	MAP kinase ERK1	Ext Val	1	0.2894	0.7106	Outlier
Cpd0263	CHEMBL277474	CN1N(C(=O)C=C1C)c2ccccc2	IC50	=	Not Active	-1	MAP kinase ERK1	Ext Val	-1	0.9796	0.0204	In
Cpd0264	CHEMBL1732	CN1C[C@@H](C[C@H]2[C@H]1Cc3c[nH]c4cccc2c34)C(=O)N[C@]5(C)O[C@@]6(O)[C@@H]7CCCN7C(=O)[C@H](Cc8ccccc8)N6C5=O	IC50	=	Not Active	-1	MAP kinase ERK1	Ext Val	-1	0.8054	0.1946	In
Cpd0265	CHEMBL388590	CCc1oc2ccccc2c1C(=O)c3cc(Br)c(O)c(Br)c3	IC50	=	Not Active	-1	MAP kinase ERK1	Ext Val	-1	0.9414	0.0586	In
Cpd0267	CHEMBL1201195	CO[C@]1(NC(=O)CSCC#N)[C@H]2SCC(=C(N2C1=O)C(=O)O)CSc3nnnn3C	IC50	=	Not Active	-1	MAP kinase ERK1	Ext Val	-1	0.9953	0.0047	In
Cpd0269	CHEMBL707	COc1cc2nc(nc(N)c2cc1OC)N3CCN(CC3)C(=O)C4COc5ccccc5O4	IC50	=	Not Active	-1	MAP kinase ERK1	Ext Val	-1	0.5021	0.4979	In
Cpd0270	CHEMBL1370561	CN1C(=O)N(C)c2nc[nH]c2C1=O.CN3C(=O)N(C)c4nc[nH]c4C3=O.NCCN	IC50	=	Not Active	-1	MAP kinase ERK1	Ext Val	-1	0.999	0.001	In
Cpd0272	CHEMBL511829	COc1cc(Nc2nc(NCc3ccc(\C=C\C(=O)O)cc3)n4ccnc4c2C(=O)N)cc(OC)c1	IC50	>	10000	-1	MAP kinase ERK1	Ext Val	1	0.3343	0.6657	In
Cpd0274	CHEMBL1020	Cc1ccc(cc1)C(=O)c2ccc(CC(=O)O)n2C	IC50	=	Not Active	-1	MAP kinase ERK1	Ext Val	-1	0.925	0.075	In
Cpd0277	CHEMBL411	CC\C(=C(\CC)/c1ccc(O)cc1)\c2ccc(O)cc2	IC50	=	Not Active	-1	MAP kinase ERK1	Ext Val	-1	0.9846	0.0154	In
Cpd0280	CHEMBL1480	CCOC(=O)C1=C(C)NC(=C(C1c2cccc(Cl)c2Cl)C(=O)OC)C	IC50	=	Not Active	-1	MAP kinase ERK1	Ext Val	-1	0.9971	0.0029	In
Cpd0283	CHEMBL862	NC(=N)NC(=O)Cc1c(Cl)cccc1Cl	IC50	=	Not Active	-1	MAP kinase ERK1	Ext Val	-1	0.9955	0.0045	In
Cpd0284	CHEMBL219146	CC[C@]1(O)C[C@H]2CN(CCc3c([nH]c4ccccc34)[C@@](C2)(C(=O)OC)c5cc6c(cc5OC)N(C)[C@H]7[C@](O)([C@H](O)[C@]8(CC)C=CCN9CC[C@]67[C@H]89)C(=O)N)C1	IC50	=	Not Active	-1	MAP kinase ERK1	Ext Val	-1	0.9814	0.0186	In
Cpd0286	CHEMBL1950289	O[C@@H]1CC[C@H](CC1)Nc2ncc3nc(Nc4c(F)cc(F)cc4F)n([C@H]5CCOC5)c3n2	IC50	=	480	1	MAP kinase ERK1	Ext Val	-1	0.7754	0.2246	In
Cpd0290	CHEMBL1297	CC(C(=O)O)c1cccc(Oc2ccccc2)c1	IC50	=	Not Active	-1	MAP kinase ERK1	Ext Val	-1	0.8114	0.1886	In
Cpd0291	CHEMBL406971	OCC1=C(c2ccccc2)c3cc(Br)ccc3C(=O)N1CC4CCCCC4	IC50	>	1100	-1	MAP kinase ERK1	Ext Val	-1	0.9655	0.0345	In
Cpd0292	CHEMBL1201346	OC(=O)CCNC(=O)c1ccc(cc1)\N=N\c2ccc(O)c(c2)C(=O)O	IC50	=	Not Active	-1	MAP kinase ERK1	Ext Val	1	0.1469	0.8531	In
Cpd0296	CHEMBL516640	COc1ccc(cc1)n2cnc3ccc(cc23)c4oc(SCc5cccc(c5)C#N)nn4	IC50	>	10000	-1	MAP kinase ERK1	Ext Val	1	0.0964	0.9036	In
Cpd0297	CHEMBL480014	CCOC(=O)\C=C\c1ccc(CNc2nc(Nc3cc(OC)cc(OC)c3)c(C(=O)N)c4nccn24)cc1	IC50	>	10000	-1	MAP kinase ERK1	Ext Val	1	0.2326	0.7674	In
Cpd0300	CHEMBL141247	O=C(Nc1ccccn1)Nc2cccc3C(=O)N4CCC[C@@H]4c23	IC50	>	10000	-1	MAP kinase ERK1	Ext Val	1	0.4613	0.5387	In
Cpd0302	CHEMBL460472	COc1ccc2c(Oc3ccc(NC(=O)C4=C(C)N(CC(C)(C)O)N(C4=O)c5ccccc5)nc3)ccnc2c1	IC50	=	100000	-1	MAP kinase ERK1	Ext Val	-1	0.759	0.241	In
Cpd0305	CHEMBL41543	NC(=O)N1c2ccccc2CCc3ccccc13	IC50	=	Not Active	-1	MAP kinase ERK1	Ext Val	-1	0.7428	0.2572	In
Cpd0315	CHEMBL115769	COc1cc(N)[nH]c2nc(c3ccc(F)cc3)c(c4ccncc4)c12	IC50	=	Not Active	-1	MAP kinase ERK1	Ext Val	-1	0.6766	0.3234	In
Cpd0318	CHEMBL1219	COCCCOc1ccnc(C[S+]([O-])c2nc3ccccc3[nH]2)c1C	IC50	=	Not Active	-1	MAP kinase ERK1	Ext Val	-1	0.7372	0.2628	In
Cpd0324	CHEMBL426123	O=C1CC[C@H](N2C(=O)c3ccccc3C2=O)C(=O)N1	IC50	=	Not Active	-1	MAP kinase ERK1	Ext Val	-1	0.9943	0.0057	In
Cpd0325	CHEMBL1697694	COc1cc2O[C@H]3OC=C[C@H]3c2c4OC(=O)C5=C(CCC5=O)c14	IC50	=	Not Active	-1	MAP kinase ERK1	Ext Val	-1	0.991	0.009	In
Cpd0326	CHEMBL1660	CO[C@H]1\C=C\O[C@@]2(C)Oc3c(C)c(O)c4c(O)c(NC(=O)\C(=C/C=C/[C@H](C)[C@H](O)[C@@H](C)[C@@H](O)[C@@H](C)[C@H](OC(=O)C)[C@@H]1C)\C)c(\C=N\N5CCN(CC5)C6CCCC6)c(O)c4c3C2=O	IC50	=	Not Active	-1	MAP kinase ERK1	Ext Val	-1	0.9631	0.0369	In
Cpd0328	CHEMBL267744	OC(=O)COc1ccc(C(=O)c2cccs2)c(Cl)c1Cl	IC50	=	Not Active	-1	MAP kinase ERK1	Ext Val	-1	0.9947	0.0053	In
Cpd0329	CHEMBL447602	COc1cc2c(Oc3ccc(nc3)C4=CN=C(Nc5ccc(F)cc5)N(C)C4=O)ccnc2cc1OCCCN6CCOCC6	IC50	>	100000	-1	MAP kinase ERK1	Ext Val	1	0.3027	0.6973	In
Cpd0331	CHEMBL442	CN1C[C@@H](C=C2[C@H]1Cc3c[nH]c4cccc2c34)C(=O)N[C@]5(C)O[C@@]6(O)[C@@H]7CCCN7C(=O)[C@H](Cc8ccccc8)N6C5=O	IC50	=	Not Active	-1	MAP kinase ERK1	Ext Val	-1	0.8135	0.1865	In
Cpd0332	CHEMBL1503	COc1ccc2[nH]c(nc2c1)[S+]([O-])Cc3ncc(C)c(OC)c3C	IC50	=	Not Active	-1	MAP kinase ERK1	Ext Val	-1	0.6929	0.3071	In
Cpd0334	CHEMBL433257	COC(=O)C[C@](O)(CCC(C)(C)O)C(=O)O[C@H]1[C@H]2c3cc4OCOc4cc3CCN5CCC[C@]25C=C1OC	IC50	=	Not Active	-1	MAP kinase ERK1	Ext Val	-1	0.9925	0.0075	In
Cpd0335	CHEMBL3577634	COc1cccc(c1)N2C(=O)\C(=C\c3ccc(OCC(=O)Nc4cccc(Cl)c4)cc3)\N=C2c5ccccc5	IC50	=	89	1	MAP kinase ERK1	Ext Val	1	0.3609	0.6391	In
Cpd0342	CHEMBL1614641	C[C@H](C(=O)O)c1ccc2oc(nc2c1)c3ccc(F)cc3	IC50	=	Not Active	-1	MAP kinase ERK1	Ext Val	-1	0.8675	0.1325	In
Cpd0346	CHEMBL3577643	COc1ccc(cc1)N2C(=O)\C(=C\c3ccc(OCC(=O)Nc4ccccc4Cl)cc3)\N=C2c5ccccc5	IC50	=	24	1	MAP kinase ERK1	Ext Val	1	0.3462	0.6538	In
Cpd0348	CHEMBL481	CCc1c2CN3C(=O)C4=C(C=C3c2nc5ccc(OC(=O)N6CCC(CC6)N7CCCCC7)cc15)[C@@](O)(CC)C(=O)OC4	IC50	=	Not Active	-1	MAP kinase ERK1	Ext Val	1	0.1395	0.8605	In
Cpd0352	CHEMBL1333512	N(c1ccccc1)c2ccc(Nc3ccccc3)cc2	IC50	=	Not Active	-1	MAP kinase ERK1	Ext Val	-1	0.8309	0.1691	In
Cpd0353	CHEMBL1105	COc1ccc2cc(CC(=O)O)ccc2c1	IC50	=	Not Active	-1	MAP kinase ERK1	Ext Val	-1	0.898	0.102	In
Cpd0375	CHEMBL311350	CCN1C=C(C(=O)O)C(=O)c2cnc(nc12)N3CCCC3	IC50	=	Not Active	-1	MAP kinase ERK1	Ext Val	-1	0.991	0.009	In
Cpd0376	CHEMBL3350037	C[C@@H](O)[C@H](CO)NC(=O)[C@@H]1CSSC[C@H](NC(=O)[C@H](N)Cc2ccccc2)C(=O)N[C@@H](Cc3ccccc3)C(=O)N[C@H](Cc4c[nH]c5ccccc45)C(=O)N[C@@H](CCCCN)C(=O)N[C@@H]([C@@H](C)O)C(=O)N1	IC50	=	Not Active	-1	MAP kinase ERK1	Ext Val	1	0	1	Outlier
Cpd0381	CHEMBL416	COc1c2OC(=O)C=Cc2cc3ccoc13	IC50	=	Not Active	-1	MAP kinase ERK1	Ext Val	-1	0.9631	0.0369	In
Cpd0392	CHEMBL1679	NC1=NC(=O)C2=C(NCC(CNc3ccc(cc3)C(=O)N[C@@H](CCC(=O)O)C(=O)O)N2C=O)N1	IC50	=	Not Active	-1	MAP kinase ERK1	Ext Val	-1	0.9925	0.0075	In
Cpd0399	CHEMBL1483	CCCSc1ccc2nc(NC(=O)OC)[nH]c2c1	IC50	=	Not Active	-1	MAP kinase ERK1	Ext Val	-1	0.9602	0.0398	In
Cpd0400	CHEMBL2205637	Cl.CC(C)(C)c1ccc(cc1)C(=O)Nc2cn3cc(ccc3n2)n4ccnc4	IC50	>	10000	-1	MAP kinase ERK1	Ext Val	-1	0.7568	0.2432	In
Cpd0405	CHEMBL1909048	Clc1ccccc1C(=O)N2CCC(Cc3ccccc3)CC2	IC50	=	Not Active	-1	MAP kinase ERK1	Ext Val	-1	0.8759	0.1241	In
Cpd0423	CHEMBL75435	C[C@H](C(=O)O)c1cccc(c1)C(=O)c2ccccc2	IC50	=	Not Active	-1	MAP kinase ERK1	Ext Val	-1	0.8379	0.1621	In
Cpd0424	CHEMBL1108	Fc1ccc(cc1)C(=O)CCCN2CCC(=CC2)N3C(=O)Nc4ccccc34	IC50	=	Not Active	-1	MAP kinase ERK1	Ext Val	1	0.4114	0.5886	In
Cpd0426	CHEMBL1491	CCOC(=O)C1=C(COCCN)NC(=C(C1c2ccccc2Cl)C(=O)OC)C	IC50	=	Not Active	-1	MAP kinase ERK1	Ext Val	-1	0.9959	0.0041	In
Cpd0430	CHEMBL63323	OC(=O)c1cccnc1Nc2cccc(c2)C(F)(F)F	IC50	=	Not Active	-1	MAP kinase ERK1	Ext Val	1	0.2502	0.7498	In
Cpd0435	CHEMBL1542	Cn1cnc(c1Sc2ncnc3nc[nH]c23)[N+](=O)[O-]	IC50	=	Not Active	-1	MAP kinase ERK1	Ext Val	-1	0.9956	0.0044	In
Cpd0440	CHEMBL622	CCc1cccc2c3CCOC(CC)(CC(=O)O)c3[nH]c12	IC50	=	Not Active	-1	MAP kinase ERK1	Ext Val	-1	0.9782	0.0218	In
Cpd0441	CHEMBL2046643	CC(C)C[C@H]1CN(CCN1)c2ccc(c(n2)C(=O)c3cccnc3N)C(F)(F)F	IC50	>	2000	-1	MAP kinase ERK1	Ext Val	-1	0.7015	0.2985	In
Cpd0453	CHEMBL898	OC(=O)c1cc(ccc1O)c2ccc(F)cc2F	IC50	=	Not Active	-1	MAP kinase ERK1	Ext Val	-1	0.7985	0.2015	In
Cpd0457	CHEMBL1068	NC(=O)N1c2ccccc2CC(=O)c3ccccc13	IC50	=	Not Active	-1	MAP kinase ERK1	Ext Val	-1	0.8255	0.1745	In
Cpd0461	CHEMBL310555	Oc1cccc2cccnc12	IC50	=	Not Active	-1	MAP kinase ERK1	Ext Val	-1	0.9767	0.0233	In
Cpd0491	CHEMBL744	Nc1nc2ccc(OC(F)(F)F)cc2s1	IC50	=	Not Active	-1	MAP kinase ERK1	Ext Val	-1	0.9537	0.0463	In
Cpd0515	CHEMBL139	OC(=O)Cc1ccccc1Nc2c(Cl)cccc2Cl	IC50	=	Not Active	-1	MAP kinase ERK1	Ext Val	-1	0.9509	0.0491	In
Cpd0526	CHEMBL16	OC1=NC(=O)C(N1)(c2ccccc2)c3ccccc3	IC50	=	Not Active	-1	MAP kinase ERK1	Ext Val	-1	0.987	0.013	In
Cpd0527	CHEMBL1069	CCCCC(=O)N(Cc1ccc(cc1)c2ccccc2c3nnn[nH]3)[C@@H](C(C)C)C(=O)O	IC50	=	Not Active	-1	MAP kinase ERK1	Ext Val	1	0.1764	0.8236	In
Cpd0529	CHEMBL1177	NC1=NC(=O)C(O1)c2ccccc2	IC50	=	Not Active	-1	MAP kinase ERK1	Ext Val	-1	0.986	0.014	In
Cpd0530	CHEMBL43064	C(\C=C\c1ccccc1)N2CCN(CC2)C(c3ccccc3)c4ccccc4	IC50	=	Not Active	-1	MAP kinase ERK1	Ext Val	-1	0.7225	0.2775	In
Cpd0531	CHEMBL1619	Nc1nc(Cl)nc2c1ncn2[C@H]3C[C@H](O)[C@@H](CO)O3	IC50	=	Not Active	-1	MAP kinase ERK1	Ext Val	-1	0.9589	0.0411	In
Cpd0534	CHEMBL190	CN1C(=O)N(C)c2[nH]cnc2C1=O	IC50	=	Not Active	-1	MAP kinase ERK1	Ext Val	-1	0.9974	0.0026	In
Cpd0537	CHEMBL1336	CNC(=O)c1cc(Oc2ccc(NC(=O)Nc3ccc(Cl)c(c3)C(F)(F)F)cc2)ccn1	IC50	=	18.1	1	MAP kinase ERK1	Ext Val	1	0.0141	0.9859	In
Cpd0551	CHEMBL295416	Cc1cccc(Nc2cc(Cl)nc(SCC(=O)O)n2)c1C	IC50	=	Not Active	-1	MAP kinase ERK1	Ext Val	-1	0.8117	0.1883	In
Cpd0553	CHEMBL16068	Brc1ccccc1	IC50	=	Not Active	-1	MAP kinase ERK1	Ext Val	-1	0.9983	0.0017	In
Cpd0555	CHEMBL424	OC(=O)c1ccccc1O	IC50	=	Not Active	-1	MAP kinase ERK1	Ext Val	-1	0.9641	0.0359	In
Cpd0557	CHEMBL42442	COC(=O)Nc1nc2cc(ccc2[nH]1)[S+]([O-])c3ccccc3	IC50	=	Not Active	-1	MAP kinase ERK1	Ext Val	-1	0.855	0.145	In
Cpd0558	CHEMBL1612004	COc1ccccc1N	IC50	=	Not Active	-1	MAP kinase ERK1	Ext Val	-1	0.996	0.004	In
Cpd0562	CHEMBL93645	OC(=O)COC(=O)Cc1ccccc1Nc2c(Cl)cccc2Cl	IC50	=	Not Active	-1	MAP kinase ERK1	Ext Val	-1	0.9395	0.0605	In
Cpd0563	CHEMBL6466	O=C1Oc2ccccc2C=C1	IC50	=	Not Active	-1	MAP kinase ERK1	Ext Val	-1	0.9533	0.0467	In
Cpd0574	CHEMBL1502	COc1ccnc(C[S+]([O-])c2nc3cc(OC(F)F)ccc3[nH]2)c1OC	IC50	=	Not Active	-1	MAP kinase ERK1	Ext Val	-1	0.6021	0.3979	In
Cpd0577	CHEMBL468	O=C1CCC(N2C(=O)c3ccccc3C2=O)C(=O)N1	IC50	=	Not Active	-1	MAP kinase ERK1	Ext Val	-1	0.9943	0.0057	In
Cpd0582	CHEMBL1230333	OC(=O)CCCc1cccs1	IC50	=	Not Active	-1	MAP kinase ERK1	Ext Val	-1	0.9984	0.0016	In
Cpd0583	CHEMBL1568	Nc1nc(F)nc2c1ncn2[C@@H]3O[C@H](CO)[C@@H](O)[C@@H]3O	IC50	=	Not Active	-1	MAP kinase ERK1	Ext Val	-1	0.9498	0.0502	In
Cpd0585	CHEMBL1592	CCOC(=O)[C@H](CCc1ccccc1)N[C@@H](C)C(=O)N2Cc3ccccc3C[C@H]2C(=O)O	IC50	=	Not Active	-1	MAP kinase ERK1	Ext Val	-1	0.7155	0.2845	In
Cpd0586	CHEMBL1630578	C[C@@H]1C[C@H]2[C@@H]3CCC4=CC(=O)C=C[C@]4(C)C3=CC[C@]2(C)[C@H]1C(=O)CN5CCN(CC5)c6cc(nc(n6)N7CCCC7)N8CCCC8	IC50	=	16262	-1	MAP kinase ERK1	Ext Val	-1	0.6496	0.3504	In
Cpd0587	CHEMBL1221	Clc1ccc(CSC(Cn2ccnc2)c3ccc(Cl)cc3Cl)cc1	IC50	=	Not Active	-1	MAP kinase ERK1	Ext Val	-1	0.9656	0.0344	In
Cpd0588	CHEMBL280074	Cn1cnc2c(NCc3ccccc3)nc(NCCO)nc12	IC50	=	30000	-1	MAP kinase ERK1	Ext Val	-1	0.7144	0.2856	In
Cpd0589	CHEMBL702	CCN1CCN(C(=O)N[C@@H](C(=O)N[C@H]2[C@H]3SC(C)(C)[C@@H](N3C2=O)C(=O)O)c4ccccc4)C(=O)C1=O	IC50	=	Not Active	-1	MAP kinase ERK1	Ext Val	-1	0.8637	0.1363	In
Cpd0590	CHEMBL19299	CC(C(=O)O)c1ccc(CC2CCCC2=O)cc1	IC50	=	Not Active	-1	MAP kinase ERK1	Ext Val	-1	0.851	0.149	In
Cpd0591	CHEMBL37161	COC(=O)Nc1nc2ccc(Sc3ccccc3)cc2[nH]1	IC50	=	Not Active	-1	MAP kinase ERK1	Ext Val	-1	0.7407	0.2593	In
Cpd0594	CHEMBL521589	CN(C)C(=O)Oc1cc(OC(=O)N(C)C)cc(c1)C(O)CNC(C)(C)C	IC50	=	Not Active	-1	MAP kinase ERK1	Ext Val	-1	0.8817	0.1183	In
Cpd0595	CHEMBL456	CCC(=C)C(=O)c1ccc(OCC(=O)O)c(Cl)c1Cl	IC50	=	Not Active	-1	MAP kinase ERK1	Ext Val	-1	0.9953	0.0047	In
Cpd0598	CHEMBL1200845	CC1(C)O[C@@H]2C[C@H]3[C@@H]4CCC5=CC(=O)CC[C@]5(C)[C@@]4(F)[C@@H](O)C[C@]3(C)[C@@]2(O1)C(=O)CCl	IC50	=	Not Active	-1	MAP kinase ERK1	Ext Val	-1	0.9979	0.0021	In
Cpd0599	CHEMBL1373	NC(=O)C[S+]([O-])C(c1ccccc1)c2ccccc2	IC50	=	Not Active	-1	MAP kinase ERK1	Ext Val	-1	0.9733	0.0267	In
Cpd0600	CHEMBL1200633	CC[C@H](C)[C@H]1O[C@]2(CC[C@@H]1C)C[C@@H]3C[C@@H](C\C=C(/C)\[C@@H](O[C@H]4C[C@H](OC)[C@@H](O[C@H]5C[C@H](OC)[C@@H](O)[C@H](C)O5)[C@H](C)O4)[C@@H](C)\C=C\C=C\6/CO[C@@H]7[C@H](O)C(=C[C@@H](C(=O)O3)[C@]67O)C)O2.CO[C@H]8C[C@H](O[C@H]9[C@H](C)O[C@H](C[C@@H]9OC)O[C@H]%10[C@@H](C)\C=C\C=C\%11/CO[C@@H]%12[C@H](O)C(=C[C@@H](C(=O)O[C@H]%13C[C@@H](C\C=C\%10/C)O[C@@]%14(CC[C@H](C)[C@H](O%14)C(C)C)C%13)[C@]%1…	IC50	=	Not Active	-1	MAP kinase ERK1	Ext Val	-1	0.9646	0.0354	In
Cpd0602	CHEMBL1527608	CN1C(=O)N(C)c2ncn(CC3OCCO3)c2C1=O	IC50	=	Not Active	-1	MAP kinase ERK1	Ext Val	-1	0.9984	0.0016	In
Cpd0603	CHEMBL1319362	Br.CN1[C@@H]2CC[C@H]1C[C@H](C2)OC(=O)C(O)c3ccccc3	IC50	=	Not Active	-1	MAP kinase ERK1	Ext Val	-1	0.9487	0.0513	In
Cpd0604	CHEMBL194436	Fc1cc(cc(c1)C(=O)Nc2ccc(Cl)c(COc3cccnc3)c2)N4CCOCC4	IC50	>	10000	-1	MAP kinase ERK1	Ext Val	1	0.0533	0.9467	In
Cpd0606	CHEMBL475534	CCOC(=O)C1=C(C)NC(=C(C1c2cccc(c2)[N+](=O)[O-])C(=O)OC)C	IC50	=	Not Active	-1	MAP kinase ERK1	Ext Val	-1	0.9922	0.0078	In
Cpd0607	CHEMBL597	Cc1ccc(cc1)N(CC2=NCCN2)c3cccc(O)c3	IC50	=	Not Active	-1	MAP kinase ERK1	Ext Val	-1	0.9325	0.0675	In
Cpd0611	CHEMBL325372	COC(=O)c1ccc(O)cc1	IC50	=	Not Active	-1	MAP kinase ERK1	Ext Val	-1	0.9533	0.0467	In
Cpd0614	CHEMBL114	CC(C)(C)NC(=O)[C@@H]1C[C@@H]2CCCC[C@@H]2CN1C[C@@H](O)[C@H](Cc3ccccc3)NC(=O)[C@H](CC(=O)N)NC(=O)c4ccc5ccccc5n4	IC50	=	Not Active	-1	MAP kinase ERK1	Ext Val	1	0.1864	0.8136	In
Cpd0622	CHEMBL1467	O=C1N=CN=C2NNC=C12	IC50	=	Not Active	-1	MAP kinase ERK1	Ext Val	-1	0.9988	0.0012	In
Cpd0624	CHEMBL423192	COc1ccc(C[C@H]2NC[C@H](O)[C@H]2OC(=O)C)cc1	IC50	=	Not Active	-1	MAP kinase ERK1	Ext Val	-1	0.9157	0.0843	In
Cpd0627	CHEMBL289469	CN1C2CCCC1CC(C2)NC(=O)c3nn(C)c4ccccc34	IC50	=	Not Active	-1	MAP kinase ERK1	Ext Val	-1	0.9616	0.0384	In
Cpd0628	CHEMBL24	CC(C)NCC(O)COc1ccc(CC(=O)N)cc1	IC50	=	Not Active	-1	MAP kinase ERK1	Ext Val	-1	0.8691	0.1309	In
Cpd0630	CHEMBL14060	Oc1ccccc1	IC50	=	Not Active	-1	MAP kinase ERK1	Ext Val	-1	0.9958	0.0042	In
Cpd0631	CHEMBL628	CN1C(=O)N(CCCCC(=O)C)C(=O)c2c1ncn2C	IC50	=	Not Active	-1	MAP kinase ERK1	Ext Val	-1	0.9969	0.0031	In
Cpd0632	CHEMBL1428	COCCOC(=O)C1=C(C)NC(=C(C1c2cccc(c2)[N+](=O)[O-])C(=O)OC(C)C)C	IC50	=	Not Active	-1	MAP kinase ERK1	Ext Val	-1	0.9897	0.0103	In
Cpd0633	CHEMBL211501	CCCCCC[C@@H]1[C@@H](OC(=O)CC(C)C)[C@H](C)OC(=O)[C@@H](NC(=O)c2cccc(NC=O)c2O)[C@@H](C)OC1=O	IC50	=	Not Active	-1	MAP kinase ERK1	Ext Val	-1	0.9892	0.0108	In
Cpd0640	CHEMBL32749	COc1cc(\C=C\C(=O)O)ccc1O	IC50	=	Not Active	-1	MAP kinase ERK1	Ext Val	-1	0.9635	0.0365	In
Cpd0645	CHEMBL614	NC(=O)c1cnccn1	IC50	=	Not Active	-1	MAP kinase ERK1	Ext Val	-1	0.9012	0.0988	In
Cpd0646	CHEMBL57	Cc1ccnc2N(C3CC3)c4ncccc4C(=O)Nc12	IC50	=	Not Active	-1	MAP kinase ERK1	Ext Val	-1	0.7249	0.2751	In
Cpd0648	CHEMBL264374	CC(C)(Oc1ccc(CCNC(=O)c2ccc(Cl)cc2)cc1)C(=O)O	IC50	=	Not Active	-1	MAP kinase ERK1	Ext Val	-1	0.7311	0.2689	In
Cpd0649	CHEMBL49	O=C1CC2(CCCC2)CC(=O)N1CCCCN3CCN(CC3)c4ncccn4	IC50	=	Not Active	-1	MAP kinase ERK1	Ext Val	-1	0.9324	0.0676	In
Cpd0651	CHEMBL989	CC1(C)O[C@@H]2C[C@H]3[C@@H]4C[C@H](F)C5=CC(=O)C=C[C@]5(C)[C@@]4(F)[C@@H](O)C[C@]3(C)[C@@]2(O1)C(=O)CO	IC50	=	Not Active	-1	MAP kinase ERK1	Ext Val	-1	0.991	0.009	In
Cpd0653	CHEMBL1198	CCCCOc1ccc(OCCCN2CCOCC2)cc1	IC50	=	Not Active	-1	MAP kinase ERK1	Ext Val	-1	0.9681	0.0319	In
Cpd0657	CHEMBL521	CC(C)Cc1ccc(cc1)C(C)C(=O)O	IC50	=	Not Active	-1	MAP kinase ERK1	Ext Val	-1	0.9411	0.0589	In
Cpd0658	CHEMBL1388	Oc1ccc(OCc2ccccc2)cc1	IC50	=	Not Active	-1	MAP kinase ERK1	Ext Val	-1	0.9181	0.0819	In
Cpd0661	CHEMBL70927	CN1C=CC(=O)C(=C1C)O	IC50	=	Not Active	-1	MAP kinase ERK1	Ext Val	-1	0.9985	0.0015	In
Cpd0662	CHEMBL15245	COC(=O)[C@H]1[C@@H](O)CC[C@H]2CN3CCc4c([nH]c5ccccc45)[C@@H]3C[C@H]12	IC50	=	Not Active	-1	MAP kinase ERK1	Ext Val	-1	0.9797	0.0203	In
Cpd0663	CHEMBL34259	CN(Cc1cnc2nc(N)nc(N)c2n1)c3ccc(cc3)C(=O)N[C@@H](CCC(=O)O)C(=O)O	IC50	=	Not Active	-1	MAP kinase ERK1	Ext Val	-1	0.6608	0.3392	In
Cpd0664	CHEMBL221753	[Cl-].CC(C)(C)CC(C)(C)c1ccc(OCCOCC[N+](C)(C)Cc2ccccc2)cc1	IC50	=	Not Active	-1	MAP kinase ERK1	Ext Val	-1	0.9753	0.0247	In
Cpd0665	CHEMBL838	CCOC(=O)[C@H](CCc1ccccc1)N[C@H]2CCc3ccccc3N(CC(=O)O)C2=O	IC50	=	Not Active	-1	MAP kinase ERK1	Ext Val	-1	0.8973	0.1027	In
Cpd0667	CHEMBL85728	Nc1ccc(Cc2ccc(N)cc2)cc1	IC50	=	Not Active	-1	MAP kinase ERK1	Ext Val	-1	0.961	0.039	In
Cpd0668	CHEMBL508102	CCOC(=O)N1C=CN(C)C1=S	IC50	=	Not Active	-1	MAP kinase ERK1	Ext Val	-1	0.9971	0.0029	In
Cpd0671	CHEMBL1365675	CN(\C=N\c1ccc(C)cc1C)\C=N\c2ccc(C)cc2C	IC50	=	Not Active	-1	MAP kinase ERK1	Ext Val	-1	0.8362	0.1638	In
Cpd0675	CHEMBL38	C\C(=C/C=C/C(=C/C(=O)O)/C)\C=C\C1=C(C)CCCC1(C)C	IC50	=	Not Active	-1	MAP kinase ERK1	Ext Val	-1	0.9065	0.0935	In
Cpd0676	CHEMBL515	OC(=O)CCCc1ccc(cc1)N(CCCl)CCCl	IC50	=	Not Active	-1	MAP kinase ERK1	Ext Val	-1	0.9723	0.0277	In
Cpd0678	CHEMBL1515	CN1C=CNC1=S	IC50	=	Not Active	-1	MAP kinase ERK1	Ext Val	-1	0.9999	0.0001	In
Cpd0680	CHEMBL60889	CCOc1cc(N)c(Cl)cc1C(=O)NCC2CN(Cc3ccc(F)cc3)CCO2	IC50	=	Not Active	-1	MAP kinase ERK1	Ext Val	-1	0.7738	0.2262	In
Cpd0684	CHEMBL319244	Oc1ccc(\C=C\C(=O)OCCc2ccccc2)cc1O	IC50	=	Not Active	-1	MAP kinase ERK1	Ext Val	1	0.3986	0.6014	In
Cpd0685	CHEMBL427526	CC(C)Cc1ccc(cc1)[C@@H](C)C(=O)O	IC50	=	Not Active	-1	MAP kinase ERK1	Ext Val	-1	0.9411	0.0589	In
Cpd0686	CHEMBL1405	C[C@]12CC[C@H]3[C@@H](CCc4cc(O)ccc34)[C@@H]1CCC2=O	IC50	=	Not Active	-1	MAP kinase ERK1	Ext Val	-1	0.9797	0.0203	In
Cpd0688	CHEMBL852	N[C@@H](Cc1ccc(cc1)N(CCCl)CCCl)C(=O)O	IC50	=	Not Active	-1	MAP kinase ERK1	Ext Val	-1	0.9453	0.0547	In
Cpd0689	CHEMBL686	Cc1cccc(Nc2ccccc2C(=O)O)c1C	IC50	=	Not Active	-1	MAP kinase ERK1	Ext Val	-1	0.7207	0.2793	In
Cpd0691	CHEMBL157101	CC(=O)N1CCN(CC1)c2ccc(OCC3COC(Cn4ccnc4)(O3)c5ccc(Cl)cc5Cl)cc2	IC50	=	Not Active	-1	MAP kinase ERK1	Ext Val	-1	0.9401	0.0599	In
Cpd0692	CHEMBL672	CC(C)OC(=O)C(C)(C)Oc1ccc(cc1)C(=O)c2ccc(Cl)cc2	IC50	=	Not Active	-1	MAP kinase ERK1	Ext Val	-1	0.8326	0.1674	In
Cpd0698	CHEMBL55	NC(=N)c1ccc(OCCCCCOc2ccc(cc2)C(=N)N)cc1	IC50	=	Not Active	-1	MAP kinase ERK1	Ext Val	-1	0.6742	0.3258	In
Cpd0700	CHEMBL526	CC(C)c1cccc(C(C)C)c1O	IC50	=	Not Active	-1	MAP kinase ERK1	Ext Val	-1	0.9977	0.0023	In
Cpd0714	CHEMBL1873703	ClC1=C(Cl)[C@@]2(Cl)[C@H]3[C@H]4C[C@H]([C@@H]5O[C@H]45)[C@H]3[C@]1(Cl)C2(Cl)Cl	IC50	=	Not Active	-1	MAP kinase ERK1	Ext Val	-1	1	0	Outlier
Cpd0715	CHEMBL193482	C[C@]12CC[C@H]3[C@@H](CCc4cc(O)ccc34)[C@@H]1C[C@@H](O)[C@@H]2O	IC50	=	Not Active	-1	MAP kinase ERK1	Ext Val	-1	0.9909	0.0091	In
Cpd0717	CHEMBL1730	CO\N=C(/C(=O)N[C@H]1[C@H]2SCC(=C(N2C1=O)C(=O)O)COC(=O)C)\c3csc(N)n3	IC50	=	Not Active	-1	MAP kinase ERK1	Ext Val	-1	0.9726	0.0274	In
Cpd0721	CHEMBL1070	COc1ccc2cc(CCC(=O)C)ccc2c1	IC50	=	Not Active	-1	MAP kinase ERK1	Ext Val	-1	0.9488	0.0512	In
Cpd0722	CHEMBL112	CC(=O)Nc1ccc(O)cc1	IC50	=	Not Active	-1	MAP kinase ERK1	Ext Val	-1	0.9798	0.0202	In
Cpd0723	CHEMBL334255	[Br-].CCCCCCCCCCCCCCCC[n+]1ccccc1	IC50	=	Not Active	-1	MAP kinase ERK1	Ext Val	-1	0.9926	0.0074	In
Cpd0724	CHEMBL182	Nc1nc(O)c2ncn(COC(CO)CO)c2n1	IC50	=	Not Active	-1	MAP kinase ERK1	Ext Val	-1	0.9453	0.0547	In
Cpd0726	CHEMBL1162	C[C@]12CC[C@H]3[C@@H](CCC4=CC(=O)CC[C@H]34)[C@@H]1CC[C@@]2(O)C#C	IC50	=	Not Active	-1	MAP kinase ERK1	Ext Val	-1	0.9422	0.0578	In
Cpd0728	CHEMBL584	Cc1c(O)cccc1C(=O)N[C@@H](CSc2ccccc2)[C@H](O)CN3C[C@H]4CCCC[C@H]4C[C@H]3C(=O)NC(C)(C)C	IC50	=	22503	-1	MAP kinase ERK1	Ext Val	-1	0.7584	0.2416	In
Cpd0729	CHEMBL895	O[C@H]1CC[C@@]2(O)[C@H]3Cc4ccc(O)c5O[C@@H]1[C@]2(CCN3CC6CCC6)c45	IC50	=	Not Active	-1	MAP kinase ERK1	Ext Val	-1	0.9984	0.0016	In
Cpd0730	CHEMBL762	Cc1cc(c(O)c(C)c1CC2=NCCN2)C(C)(C)C	IC50	=	Not Active	-1	MAP kinase ERK1	Ext Val	-1	0.9839	0.0161	In
Cpd0731	CHEMBL1790041	CNC(=C[N+](=O)[O-])NCCSCc1oc(CN(C)C)cc1	IC50	=	Not Active	-1	MAP kinase ERK1	Ext Val	-1	0.9978	0.0022	In
Cpd0734	CHEMBL408	Cc1c(C)c2OC(C)(COc3ccc(CC4SC(=O)NC4=O)cc3)CCc2c(C)c1O	IC50	=	Not Active	-1	MAP kinase ERK1	Ext Val	-1	0.6319	0.3681	In
Cpd0735	CHEMBL1540	Nc1nc(O)c2ncn(CCC(CO)CO)c2n1	IC50	=	Not Active	-1	MAP kinase ERK1	Ext Val	-1	0.9626	0.0374	In
Cpd0737	CHEMBL165	Oc1ccc(\C=C\c2cc(O)cc(O)c2)cc1	IC50	=	Not Active	-1	MAP kinase ERK1	Ext Val	-1	0.9663	0.0337	In
Cpd0740	CHEMBL833	Clc1ccccc1CN2CCc3sccc3C2	IC50	=	Not Active	-1	MAP kinase ERK1	Ext Val	-1	0.9874	0.0126	In
Cpd0744	CHEMBL127516	CCCCOC(=O)c1ccc(N)cc1	IC50	=	Not Active	-1	MAP kinase ERK1	Ext Val	-1	0.9097	0.0903	In
Cpd0747	CHEMBL72	CNCCCN1c2ccccc2CCc3ccccc13	IC50	=	Not Active	-1	MAP kinase ERK1	Ext Val	-1	0.9913	0.0087	In
Cpd0748	CHEMBL1064	CCC(C)(C)C(=O)O[C@H]1C[C@@H](C)C=C2C=C[C@H](C)[C@H](CC[C@@H]3C[C@@H](O)CC(=O)O3)[C@@H]12	IC50	=	Not Active	-1	MAP kinase ERK1	Ext Val	-1	0.9986	0.0014	In
Cpd0749	CHEMBL23327	CC(C)[C@H](CO)Nc1nc(Nc2cccc(Cl)c2)c3ncn(C(C)C)c3n1	IC50	=	9000	-1	MAP kinase ERK1	Ext Val	-1	0.8469	0.1531	In
Cpd0753	CHEMBL727	NC1=Nc2[nH]cnc2C(=S)N1	IC50	=	5516	-1	MAP kinase ERK1	Ext Val	-1	0.9994	0.0006	In
Cpd0761	CHEMBL248702	CCN[C@@H](C)Cc1cccc(c1)C(F)(F)F	IC50	=	Not Active	-1	MAP kinase ERK1	Ext Val	-1	0.9703	0.0297	In
Cpd0762	CHEMBL1480987	CC1CC(CC(C)(C)C1)OC(=O)C(O)c2ccccc2	IC50	=	Not Active	-1	MAP kinase ERK1	Ext Val	-1	0.962	0.038	In
Cpd0764	CHEMBL826	CCN1C=C(C(=O)O)C(=O)c2cc(F)c(nc12)N3CCNCC3	IC50	=	Not Active	-1	MAP kinase ERK1	Ext Val	-1	0.9823	0.0177	In
Cpd0777	CHEMBL640	CCN(CC)CCNC(=O)c1ccc(N)cc1	IC50	=	Not Active	-1	MAP kinase ERK1	Ext Val	-1	0.9387	0.0613	In
Cpd0778	CHEMBL485549	Oc1c(cc(cc1[N+](=O)[O-])[N+](=O)[O-])C(=O)N\N=C\c2oc(cc2)[N+](=O)[O-]	IC50	=	Not Active	-1	MAP kinase ERK1	Ext Val	-1	0.9867	0.0133	In
Cpd0788	CHEMBL267648	CCN1C=C(C(=O)O)C(=O)c2cc(F)c(cc12)N3CCN(C)CC3	IC50	=	Not Active	-1	MAP kinase ERK1	Ext Val	-1	0.9969	0.0031	In
Cpd0789	CHEMBL458019	[Cl-].[Cl-].C[n+]1ccc(cc1)c2cc[n+](C)cc2	IC50	=	Not Active	-1	MAP kinase ERK1	Ext Val	-1	0.9988	0.0012	In
Cpd0790	CHEMBL384467	C[C@@H]1C[C@H]2[C@@H]3CCC4=CC(=O)C=C[C@]4(C)[C@@]3(F)[C@@H](O)C[C@]2(C)[C@@]1(O)C(=O)CO	IC50	=	Not Active	-1	MAP kinase ERK1	Ext Val	-1	0.9907	0.0093	In
Cpd0810	CHEMBL960	Cc1oncc1C(=O)Nc2ccc(cc2)C(F)(F)F	IC50	=	Not Active	-1	MAP kinase ERK1	Ext Val	-1	0.522	0.478	In
Cpd0811	CHEMBL972	C[C@H](Cc1ccccc1)N(C)CC#C	IC50	=	Not Active	-1	MAP kinase ERK1	Ext Val	-1	0.9784	0.0216	In
Cpd0813	CHEMBL1760	CC(C)(C)NCC(O)c1cc(O)cc(O)c1	IC50	=	Not Active	-1	MAP kinase ERK1	Ext Val	-1	0.9975	0.0025	In
Cpd0814	CHEMBL565	CCOC(=O)C(C)(C)Oc1ccc(Cl)cc1	IC50	=	Not Active	-1	MAP kinase ERK1	Ext Val	-1	0.9739	0.0261	In
Cpd0815	CHEMBL1504	CC1(C)O[C@@H]2C[C@H]3[C@@H]4CCC5=CC(=O)C=C[C@]5(C)[C@@]4(F)[C@@H](O)C[C@]3(C)[C@@]2(O1)C(=O)CO	IC50	=	Not Active	-1	MAP kinase ERK1	Ext Val	-1	0.9944	0.0056	In
Cpd0817	CHEMBL1501	CC(=O)OCC(=O)[C@@]12OC(C)(C)O[C@@H]1C[C@H]3[C@@H]4C[C@H](F)C5=CC(=O)C=C[C@]5(C)[C@@]4(F)[C@@H](O)C[C@]23C	IC50	=	Not Active	-1	MAP kinase ERK1	Ext Val	-1	0.9815	0.0185	In
Cpd0819	CHEMBL685	COC(=O)Nc1nc2ccc(cc2[nH]1)C(=O)c3ccccc3	IC50	=	Not Active	-1	MAP kinase ERK1	Ext Val	1	0.4712	0.5288	In
Cpd0821	CHEMBL17157	CC(C)(C)c1ccc(cc1)C(O)CCCN2CCC(CC2)C(O)(c3ccccc3)c4ccccc4	IC50	=	Not Active	-1	MAP kinase ERK1	Ext Val	-1	0.8348	0.1652	In
Cpd0824	CHEMBL799	O=C1CCc2cc(OCCCCc3nnnn3C4CCCCC4)ccc2N1	IC50	=	Not Active	-1	MAP kinase ERK1	Ext Val	1	0.3532	0.6468	In
Cpd0825	CHEMBL25	CC(=O)Oc1ccccc1C(=O)O	IC50	=	Not Active	-1	MAP kinase ERK1	Ext Val	-1	0.9788	0.0212	In
Cpd0827	CHEMBL717	C[C@H]1C[C@@H]2[C@H](CC[C@@]3(C)[C@H]2CC[C@]3(OC(=O)C)C(=O)C)[C@@]4(C)CCC(=O)C=C14	IC50	=	Not Active	-1	MAP kinase ERK1	Ext Val	-1	0.9642	0.0358	In
Cpd0828	CHEMBL79	CCN(CC)CC(=O)Nc1c(C)cccc1C	IC50	=	Not Active	-1	MAP kinase ERK1	Ext Val	-1	0.9768	0.0232	In
Cpd0830	CHEMBL153062	CCCCCCCCCc1ccc(O)cc1	IC50	=	Not Active	-1	MAP kinase ERK1	Ext Val	-1	0.9833	0.0167	In
Cpd0831	CHEMBL945	NC(=N)NC(=O)c1nc(Cl)c(N)nc1N	IC50	=	Not Active	-1	MAP kinase ERK1	Ext Val	-1	0.9588	0.0412	In
Cpd0832	CHEMBL934	CC(C)(C(=O)c1cccnc1)c2cccnc2	IC50	=	Not Active	-1	MAP kinase ERK1	Ext Val	-1	0.6376	0.3624	In
Cpd0834	CHEMBL900	CN(C)CCOC(c1ccccc1)c2ccccc2C	IC50	=	Not Active	-1	MAP kinase ERK1	Ext Val	-1	0.9797	0.0203	In
Cpd0835	CHEMBL1454	C1CN2C[C@@H](N=C2S1)c3ccccc3	IC50	=	Not Active	-1	MAP kinase ERK1	Ext Val	-1	0.9945	0.0055	In
Cpd0839	CHEMBL1200604	CCN(Cc1ccncc1)C(=O)C(CO)c2ccccc2	IC50	=	Not Active	-1	MAP kinase ERK1	Ext Val	-1	0.5499	0.4501	In
Cpd0840	CHEMBL1729	COC1CN(CCCOc2ccc(F)cc2)CCC1NC(=O)c3cc(Cl)c(N)cc3OC	IC50	=	Not Active	-1	MAP kinase ERK1	Ext Val	-1	0.8304	0.1696	In
Cpd0843	CHEMBL52440	COc1ccc2C[C@H]3[C@H]4CCCC[C@@]4(CCN3C)c2c1	IC50	=	Not Active	-1	MAP kinase ERK1	Ext Val	-1	0.9984	0.0016	In
Cpd0845	CHEMBL547	C\C(=C\C(=O)O)\C=C\C=C(/C)\C=C\C1=C(C)CCCC1(C)C	IC50	=	Not Active	-1	MAP kinase ERK1	Ext Val	-1	0.9065	0.0935	In
Cpd0847	CHEMBL1650	CC(=O)OCC(=O)[C@@]1(O)CC[C@H]2[C@@H]3CCC4=CC(=O)CC[C@]4(C)[C@H]3C(=O)C[C@]12C	IC50	=	Not Active	-1	MAP kinase ERK1	Ext Val	-1	0.9784	0.0216	In
Cpd0849	CHEMBL1371	Clc1ccc2OC(=O)Nc2c1	IC50	=	Not Active	-1	MAP kinase ERK1	Ext Val	-1	0.7911	0.2089	In
Cpd0850	CHEMBL6966	COc1ccc(CCN(C)CCCC(C#N)(C(C)C)c2ccc(OC)c(OC)c2)cc1OC	IC50	=	Not Active	-1	MAP kinase ERK1	Ext Val	-1	0.9787	0.0213	In
Cpd0851	CHEMBL832	[O-][S+](CCC1C(=O)N(N(C1=O)c2ccccc2)c3ccccc3)c4ccccc4	IC50	=	Not Active	-1	MAP kinase ERK1	Ext Val	-1	0.8044	0.1956	In
Cpd0852	CHEMBL1077	Nc1c(CC(=O)O)cccc1C(=O)c2ccc(Br)cc2	IC50	=	Not Active	-1	MAP kinase ERK1	Ext Val	-1	0.83	0.17	In
Cpd0853	CHEMBL2103774	C[C@@H]1CC2=C(CCC(=O)C2)[C@H]3CC[C@@]4(C)[C@@H](CC[C@@]4(O)C#C)[C@H]13	IC50	=	Not Active	-1	MAP kinase ERK1	Ext Val	-1	0.9722	0.0278	In
Cpd0855	CHEMBL1726	COC(=O)C1=C(C)NC(=C(C1c2ccccc2[N+](=O)[O-])C(=O)OCC(C)C)C	IC50	=	Not Active	-1	MAP kinase ERK1	Ext Val	-1	0.9961	0.0039	In
Cpd0856	CHEMBL194721	FC(F)(F)c1cnc(Nc2ccc3[nH]cnc3c2)nc1Nc4ccccc4Cl	IC50	>	1000	-1	MAP kinase ERK1	Ext Val	1	0.3279	0.6721	In
Cpd0857	CHEMBL434	CC(C)NCC(O)c1ccc(O)c(O)c1	IC50	=	Not Active	-1	MAP kinase ERK1	Ext Val	-1	0.9975	0.0025	In
Cpd0863	CHEMBL1456	COc1c(C)c2COC(=O)c2c(O)c1C\C=C(/C)\CCC(=O)OCCN3CCOCC3	IC50	=	Not Active	-1	MAP kinase ERK1	Ext Val	-1	0.9865	0.0135	In
Cpd0864	CHEMBL802	Nc1cc(nc(N)[n+]1[O-])N2CCCCC2	IC50	=	Not Active	-1	MAP kinase ERK1	Ext Val	-1	0.9977	0.0023	In
Cpd0866	CHEMBL1455	CN(C)c1nc(nc(n1)N(C)C)N(C)C	IC50	=	Not Active	-1	MAP kinase ERK1	Ext Val	-1	0.9978	0.0022	In
Cpd0867	CHEMBL1512	CC1(C)O[C@@H]2C[C@H]3[C@@H]4C[C@H](F)C5=CC(=O)C=C[C@]5(C)[C@H]4[C@@H](O)C[C@]3(C)[C@@]2(O1)C(=O)CO	IC50	=	Not Active	-1	MAP kinase ERK1	Ext Val	-1	0.9918	0.0082	In
Cpd0868	CHEMBL77675	N=C(Nc1ccccc1)Nc2ccccc2	IC50	=	Not Active	-1	MAP kinase ERK1	Ext Val	-1	0.811	0.189	In
Cpd0870	CHEMBL1451	C[C@]12C[C@H](O)[C@@]3(F)[C@@H](CCC4=CC(=O)C=C[C@]34C)[C@@H]1C[C@@H](O)[C@]2(O)C(=O)CO	IC50	=	Not Active	-1	MAP kinase ERK1	Ext Val	-1	0.9914	0.0086	In
Cpd0871	CHEMBL1169	Nc1ccc(C(=O)O)c(O)c1	IC50	=	Not Active	-1	MAP kinase ERK1	Ext Val	-1	0.9628	0.0372	In
Cpd0873	CHEMBL894	CC(NC(C)(C)C)C(=O)c1cccc(Cl)c1	IC50	=	Not Active	-1	MAP kinase ERK1	Ext Val	-1	0.9873	0.0127	In
Cpd0874	CHEMBL54440	CC[C@H](C)C(=O)O[C@H]1CCC=C2C=C[C@H](C)[C@H](CC[C@@H]3C[C@@H](O)CC(=O)O3)[C@@H]12	IC50	=	Not Active	-1	MAP kinase ERK1	Ext Val	-1	0.9955	0.0045	In
Cpd0875	CHEMBL30008	Fc1ccc(cc1)C(N2CCN(C\C=C\c3ccccc3)CC2)c4ccc(F)cc4	IC50	=	Not Active	-1	MAP kinase ERK1	Ext Val	-1	0.7477	0.2523	In
Cpd0877	CHEMBL45	COc1ccc2[nH]cc(CCNC(=O)C)c2c1	IC50	=	Not Active	-1	MAP kinase ERK1	Ext Val	-1	0.99	0.01	In
Cpd0878	CHEMBL27577	NC(=O)c1ccccc1O	IC50	=	Not Active	-1	MAP kinase ERK1	Ext Val	-1	0.9738	0.0262	In
Cpd0883	CHEMBL1082	CC1(C)S[C@@H]2[C@H](NC(=O)[C@H](N)c3ccc(O)cc3)C(=O)N2[C@H]1C(=O)O	IC50	=	Not Active	-1	MAP kinase ERK1	Ext Val	-1	0.9825	0.0175	In
Cpd0887	CHEMBL926	CC(CCc1ccc(O)cc1)NCCc2ccc(O)c(O)c2	IC50	=	Not Active	-1	MAP kinase ERK1	Ext Val	-1	0.9075	0.0925	In
Cpd0892	CHEMBL398440	Cc1cc(O)cc(C)c1Cl	IC50	=	Not Active	-1	MAP kinase ERK1	Ext Val	-1	0.9984	0.0016	In
Cpd0896	CHEMBL106	OC(Cn1cncn1)(Cn2cncn2)c3ccc(F)cc3F	IC50	=	Not Active	-1	MAP kinase ERK1	Ext Val	-1	0.9792	0.0208	In
Cpd0897	CHEMBL83668	CN(C(=S)Oc1ccc2ccccc2c1)c3cccc(C)c3	IC50	=	Not Active	-1	MAP kinase ERK1	Ext Val	-1	0.8365	0.1635	In
Cpd0899	CHEMBL1200623	CC[C@]1(O)CC[C@H]2[C@@H]3CCC4=CCCC[C@@H]4[C@H]3CC[C@]12C	IC50	=	Not Active	-1	MAP kinase ERK1	Ext Val	-1	0.9955	0.0045	In
Cpd0900	CHEMBL1670	ClC(Cl)C(c1ccc(Cl)cc1)c2ccccc2Cl	IC50	=	Not Active	-1	MAP kinase ERK1	Ext Val	-1	0.9953	0.0047	In
Cpd0901	CHEMBL305660	CC(C)(C)c1ccc(cc1)C(=O)CCCN2CCC(CC2)OC(c3ccccc3)c4ccccc4	IC50	=	Not Active	-1	MAP kinase ERK1	Ext Val	1	0.2593	0.7407	In
Cpd0902	CHEMBL914	CC(C)(C(=O)O)c1ccc(cc1)C(O)CCCN2CCC(CC2)C(O)(c3ccccc3)c4ccccc4	IC50	=	Not Active	-1	MAP kinase ERK1	Ext Val	1	0.4078	0.5922	In
Cpd0903	CHEMBL357995	Cc1cc2c(OCC(CNC(C)(C)C)OC(=O)c3ccccc3)cccc2[nH]1	IC50	=	Not Active	-1	MAP kinase ERK1	Ext Val	-1	0.6005	0.3995	In
Cpd0904	CHEMBL1201203	CN1[C@@H]2CC[C@H]1C[C@H](C2)OC(c3ccccc3)c4ccccc4	IC50	=	Not Active	-1	MAP kinase ERK1	Ext Val	-1	0.873	0.127	In
Cpd0910	CHEMBL12856	NC1=CC(=CNC1=O)c2ccncc2	IC50	=	Not Active	-1	MAP kinase ERK1	Ext Val	-1	0.8979	0.1021	In
Cpd0912	CHEMBL14762	CC[C@H](CO)Nc1nc(NCc2ccccc2)c3ncn(C(C)C)c3n1	IC50	=	34000	-1	MAP kinase ERK1	Ext Val	-1	0.8429	0.1571	In
Cpd0915	CHEMBL891	Cc1onc(c2ccccc2Cl)c1C(=O)N[C@H]3[C@H]4SC(C)(C)[C@@H](N4C3=O)C(=O)O	IC50	=	Not Active	-1	MAP kinase ERK1	Ext Val	-1	0.642	0.358	In
Cpd0918	CHEMBL1475	CC1=CC(=O)Oc2c(C)c3oc(C)cc3cc12	IC50	=	Not Active	-1	MAP kinase ERK1	Ext Val	-1	0.9226	0.0774	In
Cpd0920	CHEMBL540445	C\C\1=C/CC[C@@]2(C)O[C@H]2[C@H]3OC(=O)C(=C)[C@@H]3CC1	IC50	=	Not Active	-1	MAP kinase ERK1	Ext Val	-1	0.9328	0.0672	In
Cpd0922	CHEMBL160	CC[C@@H]1NC(=O)[C@H]([C@H](O)[C@H](C)C\C=C\C)N(C)C(=O)[C@H](C(C)C)N(C)C(=O)[C@H](CC(C)C)N(C)C(=O)[C@H](CC(C)C)N(C)C(=O)[C@@H](C)NC(=O)[C@H](C)NC(=O)[C@H](CC(C)C)N(C)C(=O)[C@@H](NC(=O)[C@H](CC(C)C)N(C)C(=O)CN(C)C1=O)C(C)C	IC50	=	Not Active	-1	MAP kinase ERK1	Ext Val	-1	0.9999	0.0001	Outlier
Cpd0926	CHEMBL95	Nc1c2CCCCc2nc3ccccc13	IC50	=	Not Active	-1	MAP kinase ERK1	Ext Val	-1	0.9534	0.0466	In
Cpd0928	CHEMBL175	CC(C)Cc1ccc(cc1)[C@H](C)C(=O)O	IC50	=	Not Active	-1	MAP kinase ERK1	Ext Val	-1	0.9411	0.0589	In
Cpd0931	CHEMBL503	CC[C@H](C)C(=O)O[C@H]1C[C@@H](C)C=C2C=C[C@H](C)[C@H](CC[C@@H]3C[C@@H](O)CC(=O)O3)[C@@H]12	IC50	=	Not Active	-1	MAP kinase ERK1	Ext Val	-1	0.998	0.002	In
Cpd0934	CHEMBL701	NCC(CC(=O)O)c1ccc(Cl)cc1	IC50	=	Not Active	-1	MAP kinase ERK1	Ext Val	-1	0.9722	0.0278	In
Cpd0940	CHEMBL1411979	CN(C)CCN(Cc1cccs1)c2ccccn2	IC50	=	Not Active	-1	MAP kinase ERK1	Ext Val	-1	0.9826	0.0174	In
Cpd0944	CHEMBL631	CCCNCC(O)COc1ccccc1C(=O)CCc2ccccc2	IC50	=	Not Active	-1	MAP kinase ERK1	Ext Val	-1	0.8276	0.1724	In
Cpd0945	CHEMBL154	COc1ccc2cc(ccc2c1)[C@H](C)C(=O)O	IC50	=	Not Active	-1	MAP kinase ERK1	Ext Val	-1	0.8894	0.1106	In
Cpd0950	CHEMBL269732	CO[C@@H]1C[C@@H](CC[C@H]1O)\C=C(/C)\[C@H]2OC(=O)[C@@H]3CCCCN3C(=O)C(=O)[C@]4(O)O[C@H]([C@H](C[C@@H](C)C\C(=C\[C@@H](CC=C)C(=O)C[C@H](O)[C@H]2C)\C)OC)[C@H](C[C@H]4C)OC	IC50	=	Not Active	-1	MAP kinase ERK1	Ext Val	-1	0.9661	0.0339	In
Cpd0954	CHEMBL698	CCCCNc1ccc(cc1)C(=O)OCCN(C)C	IC50	=	Not Active	-1	MAP kinase ERK1	Ext Val	-1	0.8531	0.1469	In
Cpd0955	CHEMBL101168	Nn1nnc2ccccc12	IC50	=	Not Active	-1	MAP kinase ERK1	Ext Val	-1	0.9789	0.0211	In
Cpd0956	CHEMBL1535	CCN(CCO)CCCC(C)Nc1ccnc2cc(Cl)ccc12	IC50	=	Not Active	-1	MAP kinase ERK1	Ext Val	-1	0.9265	0.0735	In
Cpd0957	CHEMBL1752	CN1C(=O)N(C)c2ncn(CC(O)CO)c2C1=O	IC50	=	Not Active	-1	MAP kinase ERK1	Ext Val	-1	0.9988	0.0012	In
Cpd0960	CHEMBL28079	CCCOc1ccccc1C2=Nc3nn[nH]c3C(=O)N2	IC50	=	Not Active	-1	MAP kinase ERK1	Ext Val	-1	0.866	0.134	In
Cpd0962	CHEMBL115	CC(C)(C)NC(=O)[C@@H]1CN(Cc2cccnc2)CCN1C[C@@H](O)C[C@@H](Cc3ccccc3)C(=O)N[C@@H]4[C@H](O)Cc5ccccc45	IC50	=	Not Active	-1	MAP kinase ERK1	Ext Val	1	0.1359	0.8641	In
Cpd0964	CHEMBL86	CCN(CC)CCNC(=O)c1cc(Cl)c(N)cc1OC	IC50	=	Not Active	-1	MAP kinase ERK1	Ext Val	-1	0.9802	0.0198	In
Cpd0965	CHEMBL714	CC(C)(C)NCC(O)c1ccc(O)c(CO)c1	IC50	=	Not Active	-1	MAP kinase ERK1	Ext Val	-1	0.9952	0.0048	In
Cpd0966	CHEMBL595	CCc1ccc(CCOc2ccc(CC3SC(=O)NC3=O)cc2)nc1	IC50	=	Not Active	-1	MAP kinase ERK1	Ext Val	1	0.1336	0.8664	In
Cpd0967	CHEMBL1460	OC[C@@H]1CC[C@@H](O1)n2cnc3C(=O)NC=Nc23	IC50	=	Not Active	-1	MAP kinase ERK1	Ext Val	-1	0.9992	0.0008	In
Cpd0968	CHEMBL163	CC(C)[C@H](NC(=O)N(C)Cc1csc(n1)C(C)C)C(=O)N[C@H](C[C@H](O)[C@H](Cc2ccccc2)NC(=O)OCc3cncs3)Cc4ccccc4	IC50	=	Not Active	-1	MAP kinase ERK1	Ext Val	1	0.1397	0.8603	In
Cpd0969	CHEMBL184	Nc1nc(O)c2ncn(COCCO)c2n1	IC50	=	Not Active	-1	MAP kinase ERK1	Ext Val	-1	0.9687	0.0313	In
Cpd0970	CHEMBL635	C[C@]12CC(=O)[C@H]3[C@@H](CCC4=CC(=O)C=C[C@]34C)[C@@H]1CC[C@]2(O)C(=O)CO	IC50	=	Not Active	-1	MAP kinase ERK1	Ext Val	-1	0.9917	0.0083	In
Cpd0971	CHEMBL273348	NC1CCN(C1)c2nc3N(C=C(C(=O)O)C(=O)c3cc2F)c4ccc(F)cc4F	IC50	=	Not Active	-1	MAP kinase ERK1	Ext Val	-1	0.9149	0.0851	In
Cpd0973	CHEMBL6	COc1ccc2c(c1)c(CC(=O)O)c(C)n2C(=O)c3ccc(Cl)cc3	IC50	=	Not Active	-1	MAP kinase ERK1	Ext Val	-1	0.9176	0.0824	In
Cpd0974	CHEMBL12089	[Cl-].COc1ccc2cc3c4cc5OCOc5cc4CC[n+]3cc2c1OC	IC50	=	Not Active	-1	MAP kinase ERK1	Ext Val	-1	0.965	0.035	In
Cpd0979	CHEMBL311469	CC(=O)Nc1ccc2c(Cc3ccccc23)c1	IC50	=	Not Active	-1	MAP kinase ERK1	Ext Val	-1	0.8901	0.1099	In
Cpd0980	CHEMBL637	COc1ccc(cc1)C(CN(C)C)C2(O)CCCCC2	IC50	=	Not Active	-1	MAP kinase ERK1	Ext Val	-1	0.9964	0.0036	In
Cpd0981	CHEMBL990	CN(Cc1ccc(cc1)C(C)(C)C)Cc2cccc3ccccc23	IC50	=	Not Active	-1	MAP kinase ERK1	Ext Val	-1	0.9144	0.0856	In
Cpd0982	CHEMBL1117	C[C@@H]1O[C@H](C[C@H](N)[C@@H]1O)O[C@H]2C[C@@](O)(Cc3c(O)c4C(=O)c5ccccc5C(=O)c4c(O)c23)C(=O)C	IC50	=	Not Active	-1	MAP kinase ERK1	Ext Val	-1	0.9053	0.0947	In
Cpd0983	CHEMBL6273	CN1CCN(CC1)c2c(F)cc3C(=O)C(=CN(CCF)c3c2F)C(=O)O	IC50	=	Not Active	-1	MAP kinase ERK1	Ext Val	-1	0.9976	0.0024	In
Cpd0986	CHEMBL191	CCCCc1nc(Cl)c(CO)n1Cc2ccc(cc2)c3ccccc3c4nnn[nH]4	IC50	=	Not Active	-1	MAP kinase ERK1	Ext Val	1	0.0563	0.9437	In
Cpd0988	CHEMBL127	C[C@@H](O)[C@@H]1[C@H]2[C@@H](C)C(=C(N2C1=O)C(=O)O)S[C@@H]3CN[C@@H](C3)C(=O)N(C)C	IC50	=	Not Active	-1	MAP kinase ERK1	Ext Val	-1	1	0	In
Cpd0989	CHEMBL413	CO[C@@H]1C[C@H](C[C@@H](C)[C@@H]2CC(=O)[C@H](C)\C=C(/C)\[C@@H](O)[C@@H](OC)C(=O)[C@H](C)C[C@H](C)\C=C\C=C\C=C(/C)\[C@H](C[C@@H]3CC[C@@H](C)[C@@](O)(O3)C(=O)C(=O)N4CCCC[C@H]4C(=O)O2)OC)CC[C@H]1O	IC50	=	Not Active	-1	MAP kinase ERK1	Ext Val	-1	0.9029	0.0971	Outlier
Cpd0991	CHEMBL8	OC(=O)C1=CN(C2CC2)c3cc(N4CCNCC4)c(F)cc3C1=O	IC50	=	Not Active	-1	MAP kinase ERK1	Ext Val	-1	0.9948	0.0052	In
Cpd0993	CHEMBL64	NNC(=O)c1ccncc1	IC50	=	Not Active	-1	MAP kinase ERK1	Ext Val	-1	0.6796	0.3204	In
Cpd0994	CHEMBL12	CN1C(=O)CN=C(c2ccccc2)c3cc(Cl)ccc13	IC50	=	Not Active	-1	MAP kinase ERK1	Ext Val	-1	0.9843	0.0157	In
Cpd0996	CHEMBL9514	COC(=O)Nc1nc2ccc(cc2[nH]1)C(=O)c3cccs3	IC50	=	Not Active	-1	MAP kinase ERK1	Ext Val	-1	0.8227	0.1773	In
Cpd0997	CHEMBL517712	CN1[C@@H]2CC[C@H]1C[C@H](C2)OC(=O)C(CO)c3ccccc3	IC50	=	Not Active	-1	MAP kinase ERK1	Ext Val	-1	0.9275	0.0725	In
Cpd0998	CHEMBL121	CN(CCOc1ccc(CC2SC(=O)NC2=O)cc1)c3ccccn3	IC50	=	Not Active	-1	MAP kinase ERK1	Ext Val	1	0.1921	0.8079	In
Cpd0999	CHEMBL650	C[C@H]1C[C@H]2[C@@H]3CC[C@](O)(C(=O)CO)[C@@]3(C)C[C@H](O)[C@@H]2[C@@]4(C)C=CC(=O)C=C14	IC50	=	Not Active	-1	MAP kinase ERK1	Ext Val	-1	0.9941	0.0059	In
Cpd1000	CHEMBL1537	CC1(C)S[C@@H]2[C@H](NC(=O)[C@H](NC(=O)N3CCNC3=O)c4ccccc4)C(=O)N2[C@H]1C(=O)O	IC50	=	Not Active	-1	MAP kinase ERK1	Ext Val	-1	0.972	0.028	In
Cpd1001	CHEMBL93	CC(N(O)C(=O)N)c1cc2ccccc2s1	IC50	=	Not Active	-1	MAP kinase ERK1	Ext Val	-1	0.9598	0.0402	In
Cpd1002	CHEMBL107	COC1=CC=C2C(=CC1=O)[C@H](CCc3cc(OC)c(OC)c(OC)c23)NC(=O)C	IC50	=	Not Active	-1	MAP kinase ERK1	Ext Val	-1	0.996	0.004	In
Cpd1005	CHEMBL866	COc1c(C)c2COC(=O)c2c(O)c1C\C=C(/C)\CCC(=O)O	IC50	=	Not Active	-1	MAP kinase ERK1	Ext Val	-1	0.9881	0.0119	In
Cpd1006	CHEMBL113	CN1C(=O)N(C)c2ncn(C)c2C1=O	IC50	=	Not Active	-1	MAP kinase ERK1	Ext Val	-1	0.9991	0.0009	In
Cpd1007	CHEMBL1395	C[C@]1(O)CC[C@H]2[C@@H]3CCC4=CC(=O)CC[C@]4(C)[C@H]3CC[C@]12C	IC50	=	Not Active	-1	MAP kinase ERK1	Ext Val	-1	0.988	0.012	In
Cpd1009	CHEMBL1425	Sc1ncnc2nc[nH]c12	IC50	=	Not Active	-1	MAP kinase ERK1	Ext Val	-1	0.979	0.021	In
Cpd1010	CHEMBL1628227	CN(C)CCC=C1c2ccccc2COc3ccccc13	IC50	=	Not Active	-1	MAP kinase ERK1	Ext Val	-1	0.9953	0.0047	In
Cpd1011	CHEMBL71	CN(C)CCCN1c2ccccc2Sc3ccc(Cl)cc13	IC50	=	Not Active	-1	MAP kinase ERK1	Ext Val	-1	0.9988	0.0012	In
Cpd1012	CHEMBL691	C[C@]12CC[C@H]3[C@@H](CCc4cc(O)ccc34)[C@@H]1CC[C@@]2(O)C#C	IC50	=	Not Active	-1	MAP kinase ERK1	Ext Val	-1	0.9776	0.0224	In
Cpd1013	CHEMBL131	C[C@]12C[C@H](O)[C@H]3[C@@H](CCC4=CC(=O)C=C[C@]34C)[C@@H]1CC[C@]2(O)C(=O)CO	IC50	=	Not Active	-1	MAP kinase ERK1	Ext Val	-1	0.9899	0.0101	In
Cpd1016	CHEMBL844	Brc1c(NC2=NCCN2)ccc3nccnc13	IC50	=	Not Active	-1	MAP kinase ERK1	Ext Val	-1	0.9458	0.0542	In
Cpd1019	CHEMBL130	OC[C@@H](NC(=O)C(Cl)Cl)[C@H](O)c1ccc(cc1)[N+](=O)[O-]	IC50	=	Not Active	-1	MAP kinase ERK1	Ext Val	-1	0.904	0.096	In
Cpd1020	CHEMBL193	COC(=O)C1=C(C)NC(=C(C1c2ccccc2[N+](=O)[O-])C(=O)OC)C	IC50	=	Not Active	-1	MAP kinase ERK1	Ext Val	-1	0.995	0.005	In
Cpd1021	CHEMBL1065	CC[C@@H](CO)NC(=O)[C@H]1CN(C)[C@@H]2Cc3cn(C)c4cccc(C2=C1)c34	IC50	=	Not Active	-1	MAP kinase ERK1	Ext Val	-1	0.9883	0.0117	In
Cpd1022	CHEMBL23	COc1ccc(cc1)[C@@H]2Sc3ccccc3N(CCN(C)C)C(=O)[C@@H]2OC(=O)C	IC50	=	Not Active	-1	MAP kinase ERK1	Ext Val	-1	0.9869	0.0131	In
Cpd1023	CHEMBL479	CSc1ccc2Sc3ccccc3N(CCC4CCCCN4C)c2c1	IC50	=	Not Active	-1	MAP kinase ERK1	Ext Val	-1	0.9985	0.0015	In
Cpd1027	CHEMBL608	CC(C)(C)c1cc(SC(C)(C)Sc2cc(c(O)c(c2)C(C)(C)C)C(C)(C)C)cc(c1O)C(C)(C)C	IC50	=	Not Active	-1	MAP kinase ERK1	Ext Val	-1	0.9994	0.0006	In
Cpd1028	CHEMBL506247	Oc1cc(cc(O)c1O)C(=O)Oc2cc(cc(O)c2O)C(=O)OC[C@H]3O[C@@H](OC(=O)c4cc(O)c(O)c(OC(=O)c5cc(O)c(O)c(O)c5)c4)[C@H](OC(=O)c6cc(O)c(O)c(OC(=O)c7cc(O)c(O)c(O)c7)c6)[C@@H](OC(=O)c8cc(O)c(O)c(OC(=O)c9cc(O)c(O)c(O)c9)c8)[C@@H]3OC(=O)c%10cc(O)c(O)c(OC(=O)c%11cc(O)c(O)c(O)c%11)c%10	IC50	=	4052	-1	MAP kinase ERK1	Ext Val	1	0.0002	0.9998	Outlier
Cpd1030	CHEMBL571	CC(C(=O)O)c1cccc(c1)C(=O)c2ccccc2	IC50	=	Not Active	-1	MAP kinase ERK1	Ext Val	-1	0.8379	0.1621	In
Cpd1031	CHEMBL561	CCN1C=C(C(=O)O)C(=O)c2cc(F)c(N3CCNC(C)C3)c(F)c12	IC50	=	Not Active	-1	MAP kinase ERK1	Ext Val	-1	0.9973	0.0027	In
Cpd1033	CHEMBL726	OCCN1CCN(CCCN2c3ccccc3Sc4ccc(cc24)C(F)(F)F)CC1	IC50	=	Not Active	-1	MAP kinase ERK1	Ext Val	-1	0.991	0.009	In
Cpd1034	CHEMBL420	NC(=N)N\N=C\c1c(Cl)cccc1Cl	IC50	=	Not Active	-1	MAP kinase ERK1	Ext Val	-1	0.9827	0.0173	In
Cpd1035	CHEMBL91	Clc1ccc(COC(Cn2ccnc2)c3ccc(Cl)cc3Cl)c(Cl)c1	IC50	=	Not Active	-1	MAP kinase ERK1	Ext Val	-1	0.843	0.157	In
Cpd1036	CHEMBL562	COC1=CC(=O)C[C@@H](C)[C@]12Oc3c(Cl)c(OC)cc(OC)c3C2=O	IC50	=	Not Active	-1	MAP kinase ERK1	Ext Val	-1	0.9993	0.0007	In
Cpd1039	CHEMBL1433	C[C@@H]1[C@H]2[C@H](O)[C@H]3[C@H](N(C)C)C(=C(C(=O)N)C(=O)[C@@]3(O)C(=C2C(=O)c4c(O)cccc14)O)O	IC50	=	Not Active	-1	MAP kinase ERK1	Ext Val	-1	0.9974	0.0026	In
Cpd1043	CHEMBL3545252	O.O.O.CC(=O)O[C@@]12CO[C@@H]1C[C@H](O)[C@]3(C)[C@@H]2[C@H](OC(=O)c4ccccc4)[C@]5(O)C[C@H](OC(=O)[C@H](O)[C@@H](NC(=O)OC(C)(C)C)c6ccccc6)C(=C([C@@H](O)C3=O)C5(C)C)C	IC50	=	Not Active	-1	MAP kinase ERK1	Ext Val	-1	0.7415	0.2585	In
Cpd1045	CHEMBL85	CC1=C(CCN2CCC(CC2)c3noc4cc(F)ccc34)C(=O)N5CCCCC5=N1	IC50	=	Not Active	-1	MAP kinase ERK1	Ext Val	-1	0.5761	0.4239	In
Cpd1046	CHEMBL1201356	CC[C@@H](CO)NC(=O)[C@H]1CN(C)[C@@H]2Cc3c[nH]c4cccc(C2=C1)c34	IC50	=	Not Active	-1	MAP kinase ERK1	Ext Val	-1	0.9839	0.0161	In
Cpd1048	CHEMBL9	CCN1C=C(C(=O)O)C(=O)c2cc(F)c(cc12)N3CCNCC3	IC50	=	Not Active	-1	MAP kinase ERK1	Ext Val	-1	0.996	0.004	In
Cpd1049	CHEMBL720	OCc1ccccc1	IC50	=	Not Active	-1	MAP kinase ERK1	Ext Val	-1	0.9944	0.0056	In
Cpd1051	CHEMBL415324	COc1ccc(\C=C\C(=O)Nc2ccccc2C(=O)O)cc1OC	IC50	=	Not Active	-1	MAP kinase ERK1	Ext Val	-1	0.7317	0.2683	In
Cpd1052	CHEMBL445	CNCCC=C1c2ccccc2CCc3ccccc13	IC50	=	Not Active	-1	MAP kinase ERK1	Ext Val	-1	0.9929	0.0071	In
Cpd1062	CHEMBL397332	CC1CNC(=O)c2[nH]c3ccc(cc3c12)C(=O)Nc4nc(cs4)C(=O)N	IC50	=	560	-1	MAP kinase ERK2	Ext Val	-1	0.9636	0.0364	In
Cpd1063	CHEMBL103055	CCN1CCOCCn2cc(C3=C(C(=O)NC3=O)c4cn(CCOCC1)c5ccccc45)c6ccccc26	IC50	>	100000	-1	MAP kinase ERK2	Ext Val	-1	0.8863	0.1137	In
Cpd1066	CHEMBL247797	CNC(=O)Nc1ccc(CNc2c(cnn2C)C(=O)Nc3ccc(SC(F)(F)F)cc3)cn1	IC50	=	899	-1	MAP kinase ERK2	Ext Val	1	0.3651	0.6349	In
Cpd1069	CHEMBL1094408	COc1ccc(cc1Nc2ncc3CCc4c(nn(C)c4c3n2)C(=O)N)N5CCN(C)CC5	IC50	>	10000	-1	MAP kinase ERK2	Ext Val	-1	0.6836	0.3164	In
Cpd1070	CHEMBL1092754	Cn1cc(\C=C\2/Oc3cccc(O)c3C2=O)c4c(ccnc14)c5ccc(cc5)C(=O)NCCO	IC50	=	50	1	MAP kinase ERK2	Ext Val	1	0.2887	0.7113	In
Cpd1071	CHEMBL565286	O=C1OC(=N/C/1=C\c2cccnc2)\C=C\c3ccccc3	IC50	>	10000	-1	MAP kinase ERK2	Ext Val	1	0.2117	0.7883	In
Cpd1072	CHEMBL378370	COc1cc2ncnc(Nc3cccc(Cl)c3F)c2cc1CN(C)C4CCNC4=O	IC50	>	10000	-1	MAP kinase ERK2	Ext Val	-1	0.6244	0.3756	In
Cpd1074	CHEMBL380889	COc1cc2ncnc(Nc3cccc(Cl)c3F)c2cc1CN(C)[C@@H](CN(C)C)C(=O)N	IC50	>	10000	-1	MAP kinase ERK2	Ext Val	-1	0.87	0.13	In
Cpd1075	CHEMBL379905	COC[C@H](N(C)Cc1cc2c(Nc3cccc(Cl)c3F)ncnc2cc1OC)C(=O)N	IC50	>	10000	-1	MAP kinase ERK2	Ext Val	-1	0.8054	0.1946	In
Cpd1076	CHEMBL380454	COc1cc2ncnc(Nc3cccc(Cl)c3F)c2cc1CN4CC[C@@H](C4)C(=O)N	IC50	>	10000	-1	MAP kinase ERK2	Ext Val	-1	0.6079	0.3921	In
Cpd1077	CHEMBL1087650	CN1C[C@@H]2C[C@H]1CN2c3ccc(cc3)c4ccnc5c(c6cccc(O)c6)c(nn45)c7ccncc7	IC50	>	50000	-1	MAP kinase ERK2	Ext Val	-1	0.6303	0.3697	In
Cpd1080	CHEMBL3671094	COc1cc(CO)ccc1c2cnc3ccc(NC(=O)N[C@H](C)CCCc4ccccc4)nc3n2	IC50	=	1	1	MAP kinase ERK2	Ext Val	1	0.0101	0.9899	In
Cpd1081	CHEMBL3671105	C[C@H](CCCc1ccccc1)NC(=O)Nc2ccc3ncc(nc3n2)c4ccc(CO)cc4	IC50	=	3	1	MAP kinase ERK2	Ext Val	1	0.0039	0.9961	In
Cpd1082	CHEMBL3671107	Cn1cc(cn1)c2cnc3ccc(NC(=O)NCCCC(C)(C)c4ccccc4)nc3n2	IC50	=	3	1	MAP kinase ERK2	Ext Val	1	0.0267	0.9733	In
Cpd1083	CHEMBL3671109	C[C@H](CCCc1ccccc1)NC(=O)Nc2ccc3ncc(nc3n2)c4cn[nH]c4	IC50	=	4	1	MAP kinase ERK2	Ext Val	1	0.0097	0.9903	In
Cpd1084	CHEMBL3671111	C[C@H](CCCc1ccccc1)NC(=O)Nc2ccc3ncc(nc3n2)N4CCCC4	IC50	=	5	1	MAP kinase ERK2	Ext Val	1	0.0287	0.9713	In
Cpd1085	CHEMBL3671114	O=C(NCCCCc1ccccc1)Nc2ccc3ncc(nc3n2)N4CCOCC4	IC50	=	6	1	MAP kinase ERK2	Ext Val	1	0.0303	0.9697	In
Cpd1086	CHEMBL3671115	C[C@H](CCCc1ccccc1)NC(=O)Nc2ccc3ncc(nc3n2)c4c(C)n[nH]c4C	IC50	=	6	1	MAP kinase ERK2	Ext Val	1	0.0098	0.9902	In
Cpd1088	CHEMBL1288098	COc1ccc(CC(=O)Nc2ccsc2c3cnccn3)cc1	IC50	>	50000	-1	MAP kinase ERK2	Ext Val	-1	0.7918	0.2082	In
Cpd1089	CHEMBL1288129	Cn1ncnc1c2ncsc2NC(=O)Cc3cccc4cnccc34	IC50	>	50000	-1	MAP kinase ERK2	Ext Val	-1	0.9435	0.0565	In
Cpd1090	CHEMBL247619	CNC(=O)Nc1ccc(CNc2c(cnn2C)C(=O)Nc3ccc4OC(F)(F)C(F)(F)Oc4c3)cn1	IC50	=	448	1	MAP kinase ERK2	Ext Val	1	0.2102	0.7898	In
Cpd1091	CHEMBL564829	CNC(=O)c1nn(C)c2c3nc(Nc4ccc(cc4)N5CCN(C)CC5)ncc3CC(C)(C)c12	IC50	>	10000	-1	MAP kinase ERK2	Ext Val	-1	0.9265	0.0735	In
Cpd1092	CHEMBL3398607	CC(C)c1cc(NC(=O)[C@@H]2CCN(CC(=O)N3CCN(CC3)c4ccc(cc4)c5ncccn5)C2)ccc1O	IC50	=	73	1	MAP kinase ERK2	Ext Val	1	0.09	0.91	In
Cpd1095	CHEMBL3318023	CCNC(=O)Nc1ccc2ncc(cc2n1)c3ccc(OC)cc3	IC50	=	1130	-1	MAP kinase ERK2	Ext Val	1	0.0549	0.9451	In
Cpd1096	CHEMBL192161	CC1(COc2ccc(Cl)cc2NC(=O)Nc3cnc(cn3)C#N)COC1	IC50	>	50000	-1	MAP kinase ERK2	Ext Val	-1	0.7535	0.2465	In
Cpd1107	CHEMBL3318024	CCNC(=O)Nc1ccc2ncc(cc2n1)c3ccc(OC)c(OC)c3	IC50	=	742	-1	MAP kinase ERK2	Ext Val	1	0.0622	0.9378	In
Cpd1108	CHEMBL3318029	Cn1cc(cn1)c2cnc3ccc(NC(=O)NCc4ccccc4)nc3c2	IC50	=	30	1	MAP kinase ERK2	Ext Val	1	0.0326	0.9674	In
Cpd1110	CHEMBL1922204	CC[C@H](Nc1nc(NCc2ccccn2)c3ncn(C(C)C)c3n1)C(C)O	IC50	=	77000	-1	MAP kinase ERK2	Ext Val	-1	0.8218	0.1782	In
Cpd1113	CHEMBL3318009	COc1ccc(cc1OC)c2cnc3c(NC(=O)NC(C)(C)C)ccnc3c2	IC50	>	100000	-1	MAP kinase ERK2	Ext Val	1	0.1116	0.8884	In
Cpd1114	CHEMBL232601	O=C(Nc1sc2N(CCCc2c1C#N)C(=O)C3CC3)c4cccc5ccccc45	IC50	>	10000	-1	MAP kinase ERK2	Ext Val	-1	0.978	0.022	In
Cpd1115	CHEMBL1272116	CC(C)c1n[nH]c(Cl)c1c2ccnc(Nc3ccc(cn3)N4CCC(CC4)N(C)C)n2	IC50	>	10000	-1	MAP kinase ERK2	Ext Val	-1	0.9464	0.0536	In
Cpd1116	CHEMBL604712	CC(C)(C)C(=O)N1Cc2c(NC(=O)c3cc(F)cc(F)c3)n[nH]c2C1(C)C	IC50	>	10000	-1	MAP kinase ERK2	Ext Val	-1	0.9324	0.0676	In
Cpd1121	CHEMBL591325	CN(C)CCOc1ccc2Nc3c(C(=O)N)c(nn3CCc2c1)c4ccc(Oc5ccccc5)cc4	IC50	>	10000	-1	MAP kinase ERK2	Ext Val	-1	0.5686	0.4314	In
Cpd1122	CHEMBL191336	OCCCNc1cc(ccn1)c2ncnc(Nc3cccc(Cl)c3)n2	IC50	>	10000	-1	MAP kinase ERK2	Ext Val	-1	0.6368	0.3632	In
Cpd1124	CHEMBL1088633	COc1cc2CCN=C(c3cccc(Cl)c3)c2cc1Cl	IC50	>	100000	-1	MAP kinase ERK2	Ext Val	-1	0.9707	0.0293	In
Cpd1125	CHEMBL1087421	COc1cc2CCN=C(c3ccc(Cl)c(Cl)c3)c2cc1Cl	IC50	>	100000	-1	MAP kinase ERK2	Ext Val	-1	0.963	0.037	In
Cpd1126	CHEMBL599224	CC(=O)N1CCC(CC1)Nc2ncc3CCc4c(nn(C)c4c3n2)C(=O)N	IC50	=	212	1	MAP kinase ERK2	Ext Val	-1	0.968	0.032	In
Cpd1127	CHEMBL357047	O=C1CCNC(=O)c2[nH]ccc12	IC50	>	2500	-1	MAP kinase ERK2	Ext Val	-1	0.9938	0.0062	In
Cpd1128	CHEMBL365847	CC(=O)C1=C(C)c2cnc(Nc3ccc(cc3)N4CCNCC4)nc2N(C5CCCC5)C1=O	IC50	>	10000	-1	MAP kinase ERK2	Ext Val	-1	0.7465	0.2535	In
Cpd1129	CHEMBL1089082	FC(F)(F)c1cccc(c1)C(=O)Nc2cccc(c2)c3ccnc4cc(nn34)c5ccncc5	IC50	>	50000	-1	MAP kinase ERK2	Ext Val	1	0.0602	0.9398	In
Cpd1132	CHEMBL1644632	Fc1ccc2cc(ccc2c1)N3C(=O)NN=C3c4ccnc(NC5CCOCC5)c4	IC50	>	50000	-1	MAP kinase ERK2	Ext Val	1	0.0471	0.9529	In
Cpd1133	CHEMBL1644634	Brc1ccc2cc(ccc2c1)N3C(=O)NN=C3c4ccnc(NC5CCOCC5)c4	IC50	>	50000	-1	MAP kinase ERK2	Ext Val	1	0.0243	0.9757	In
Cpd1134	CHEMBL211003	CNC(=O)[C@@H](C)N(C)Cc1cc2c(Nc3cccc(Cl)c3F)ncnc2cc1OC	IC50	>	10000	-1	MAP kinase ERK2	Ext Val	-1	0.7344	0.2656	In
Cpd1135	CHEMBL207687	COc1cc2ncnc(Nc3cccc(Cl)c3F)c2cc1CN(C)[C@@H](C)C(=O)N	IC50	>	10000	-1	MAP kinase ERK2	Ext Val	-1	0.6252	0.3748	In
Cpd1136	CHEMBL207246	COc1cc2ncnc(Nc3cccc(Cl)c3F)c2cc1CN4CCC4C(=O)N	IC50	>	10000	-1	MAP kinase ERK2	Ext Val	1	0.468	0.532	In
Cpd1137	CHEMBL207674	COc1cc2ncnc(Nc3cccc(Cl)c3F)c2cc1CN4CCOCC4C(=O)N	IC50	>	10000	-1	MAP kinase ERK2	Ext Val	-1	0.5934	0.4066	In
Cpd1138	CHEMBL377772	COc1cc2ncnc(Nc3cccc(Cl)c3F)c2cc1CN4CCC[C@H]4CC(=O)N	IC50	>	10000	-1	MAP kinase ERK2	Ext Val	-1	0.5744	0.4256	In
Cpd1139	CHEMBL207228	Cc1nn(C)c2N(O)c3ccc(Cl)cc3C(=O)c12	IC50	>	50000	-1	MAP kinase ERK2	Ext Val	-1	0.9501	0.0499	In
Cpd1141	CHEMBL75680	CCCCc1c([nH]c2nccnc12)c3ccc(O)cc3	IC50	=	22000	-1	MAP kinase ERK2	Ext Val	-1	0.947	0.053	In
Cpd1146	CHEMBL1288039	COc1ccc(CC(=O)Nc2ccsc2c3n[nH]c(N)n3)cc1	IC50	>	50000	-1	MAP kinase ERK2	Ext Val	-1	0.9106	0.0894	In
Cpd1156	CHEMBL1682017	Clc1csc(NC(=O)Cc2cccc3cnccc23)c1c4ncn[nH]4	IC50	>	50000	-1	MAP kinase ERK2	Ext Val	-1	0.9071	0.0929	In
Cpd1157	CHEMBL1682019	Brc1csc(NC(=O)Cc2cccc3ncccc23)c1c4ncn[nH]4	IC50	>	50000	-1	MAP kinase ERK2	Ext Val	-1	0.943	0.057	In
Cpd1165	CHEMBL1682018	O=C(Cc1cccc2cnccc12)Nc3scc(C#N)c3c4ncn[nH]4	IC50	>	50000	-1	MAP kinase ERK2	Ext Val	-1	0.6532	0.3468	In
Cpd1166	CHEMBL1682021	O=C(Cc1cccc2ncccc12)Nc3scc(C#N)c3c4ncn[nH]4	IC50	=	35100	-1	MAP kinase ERK2	Ext Val	-1	0.6904	0.3096	In
Cpd1171	CHEMBL391656	O=C(Nc1sc2N(Cc3cccnc3)CCCc2c1C#N)c4cccc5ccccc45	IC50	>	10000	-1	MAP kinase ERK2	Ext Val	-1	0.5357	0.4643	In
Cpd1172	CHEMBL371169	Clc1cccc(Nc2cncc(n2)c3cncc(NCCCn4cccn4)c3)c1	IC50	>	10000	-1	MAP kinase ERK2	Ext Val	1	0.412	0.588	In
Cpd1178	CHEMBL307145	Oc1cccc(O)c1O	IC50	=	Not Active	-1	MAP kinase ERK2	Ext Val	-1	0.9989	0.0011	In
Cpd1180	CHEMBL507666	O=C1N(Cc2ccc3OCOc3c2)C(=S)S/C/1=C\C=C\c4ccccc4	IC50	=	23700	-1	MAP kinase ERK2	Ext Val	-1	0.9704	0.0296	In
Cpd1186	CHEMBL296682	Nc1nccc(n1)c2c[nH]c3c(Br)ccc(O)c23	IC50	>	100000	-1	MAP kinase ERK2	Ext Val	-1	0.9736	0.0264	In
Cpd1192	CHEMBL1644625	O=C1NN=C(N1c2ccc3ccccc3c2)c4ccnc(Nc5ccccn5)c4	IC50	>	50000	-1	MAP kinase ERK2	Ext Val	1	0.0142	0.9858	In
Cpd1202	CHEMBL3545252	O.O.O.CC(=O)O[C@@]12CO[C@@H]1C[C@H](O)[C@]3(C)[C@@H]2[C@H](OC(=O)c4ccccc4)[C@]5(O)C[C@H](OC(=O)[C@H](O)[C@@H](NC(=O)OC(C)(C)C)c6ccccc6)C(=C([C@@H](O)C3=O)C5(C)C)C	IC50	=	Not Active	-1	MAP kinase ERK2	Ext Val	-1	0.6895	0.3105	In
Cpd1203	CHEMBL1140	NC(=O)c1cccnc1	IC50	=	Not Active	-1	MAP kinase ERK2	Ext Val	-1	0.794	0.206	In
Cpd1204	CHEMBL1612004	COc1ccccc1N	IC50	=	Not Active	-1	MAP kinase ERK2	Ext Val	-1	0.9948	0.0052	In
Cpd1209	CHEMBL232610	O=C(Nc1sc2N(CCCc2c1C#N)C(=O)c3cc[nH]n3)c4cccc5ccccc45	IC50	>	10000	-1	MAP kinase ERK2	Ext Val	-1	0.675	0.325	In
Cpd1216	CHEMBL77675	N=C(Nc1ccccc1)Nc2ccccc2	IC50	=	Not Active	-1	MAP kinase ERK2	Ext Val	-1	0.7687	0.2313	In
Cpd1218	CHEMBL242753	Oc1ccc(cc1)c2ccc(cc2)c3n[nH]c4c3Cc5cc(ccc45)C(=O)NCc6ccncc6	IC50	>	50000	-1	MAP kinase ERK2	Ext Val	1	0.004	0.996	In
Cpd1222	CHEMBL826	CCN1C=C(C(=O)O)C(=O)c2cc(F)c(nc12)N3CCNCC3	IC50	=	Not Active	-1	MAP kinase ERK2	Ext Val	-1	0.9773	0.0227	In
Cpd1226	CHEMBL1922212	CC[C@H](Nc1nc(NCc2cccnc2)c3ncn(C(C)C)c3n1)C(C)(C)O	IC50	=	35000	-1	MAP kinase ERK2	Ext Val	-1	0.8373	0.1627	In
Cpd1227	CHEMBL1922213	CC[C@H](Nc1nc(NCc2ccccc2)c3ncn(C(C)C)c3n1)C(C)O	IC50	=	29000	-1	MAP kinase ERK2	Ext Val	-1	0.7719	0.2281	In
Cpd1233	CHEMBL1644617	O=C1NN=C(N1c2ccc3ccccc3c2)c4ccncc4	IC50	>	50000	-1	MAP kinase ERK2	Ext Val	1	0.0712	0.9288	In
Cpd1237	CHEMBL1644627	O=C1NN=C(N1c2ccc3ccccc3c2)c4ccnc(Nc5nccs5)c4	IC50	>	50000	-1	MAP kinase ERK2	Ext Val	1	0.0407	0.9593	In
Cpd1243	CHEMBL1682020	Clc1csc(NC(=O)Cc2cccc3ncccc23)c1c4ncn[nH]4	IC50	>	50000	-1	MAP kinase ERK2	Ext Val	-1	0.9207	0.0793	In
Cpd1246	CHEMBL1682008	Cc1n[nH]c(n1)c2c(C)csc2NC(=O)Cc3ccc(OCCCN4CCCCC4)cc3	IC50	>	5000	-1	MAP kinase ERK2	Ext Val	-1	0.9372	0.0628	In
Cpd1251	CHEMBL454617	CC[C@H](CO)Nc1nc(NCc2ccccn2)c3ncn(C(C)C)c3n1	IC50	=	9500	-1	MAP kinase ERK2	Ext Val	-1	0.851	0.149	In
Cpd1254	CHEMBL3780350	C#Cc1cccc(Nc2nccc3nc(cnc23)c4ccccc4)c1	IC50	>	100000	-1	MAP kinase ERK2	Ext Val	1	0.3932	0.6068	In
Cpd1259	CHEMBL407	CCOC(=O)c1ncn2c1CN(C)C(=O)c3cc(F)ccc23	IC50	=	Not Active	-1	MAP kinase ERK2	Ext Val	-1	0.9917	0.0083	In
Cpd1263	CHEMBL1262	Clc1ccc(CO\N=C(/Cn2ccnc2)\c3ccc(Cl)cc3Cl)c(Cl)c1	IC50	=	Not Active	-1	MAP kinase ERK2	Ext Val	-1	0.5293	0.4707	In
Cpd1266	CHEMBL455389	CC[C@H](CO)Nc1nc(NCc2cccnc2)c3ncn(C(C)C)c3n1	IC50	=	24000	-1	MAP kinase ERK2	Ext Val	-1	0.8524	0.1476	In
Cpd1267	CHEMBL1922119	CC[C@@H](Nc1nc(NCc2cccnc2)c3ncn(C(C)C)c3n1)C(C)O	IC50	=	23000	-1	MAP kinase ERK2	Ext Val	-1	0.8235	0.1765	In
Cpd1270	CHEMBL3954737	CCNc1n[nH]c2cc(NC(=O)NC3CCCC3c4ccccc4)ncc12	IC50	=	8.3	1	MAP kinase ERK2	Ext Val	1	0.0271	0.9729	In
Cpd1271	CHEMBL4115111	CCNc1n[nH]c2cc(NC(=O)N[C@H](C)c3ccc(F)c(Cl)c3)ncc12	IC50	=	6.7	1	MAP kinase ERK2	Ext Val	1	0.0338	0.9662	In
Cpd1272	CHEMBL1333512	N(c1ccccc1)c2ccc(Nc3ccccc3)cc2	IC50	=	Not Active	-1	MAP kinase ERK2	Ext Val	-1	0.7919	0.2081	In
Cpd1281	CHEMBL225519	O=C1NCCc2[nH]c(cc12)c3ccncc3	IC50	>	10000	-1	MAP kinase ERK2	Ext Val	-1	0.7096	0.2904	In
Cpd1285	CHEMBL1650545	Cl.Cc1cn2c(cnc2c(Nc3cc(CN4CCC(F)(F)C4)ns3)n1)c5cn[nH]c5	IC50	>	100	-1	MAP kinase ERK2	Ext Val	-1	0.5041	0.4959	In
Cpd1286	CHEMBL380946	CCCCNC(=O)N1Cc2n[nH]c(NC(=O)[C@@H](C)c3ccc4ccccc4c3)c2C1	IC50	=	380	1	MAP kinase ERK2	Ext Val	1	0.0346	0.9654	In
Cpd1290	CHEMBL487154	O=C(Nc1nc(NC(=O)c2ccccc2)n(n1)c3ccccc3)c4ccccc4	IC50	=	8300	-1	MAP kinase ERK2	Ext Val	-1	0.5822	0.4178	In
Cpd1303	CHEMBL468	O=C1CCC(N2C(=O)c3ccccc3C2=O)C(=O)N1	IC50	=	Not Active	-1	MAP kinase ERK2	Ext Val	-1	0.9926	0.0074	In
Cpd1306	CHEMBL1475	CC1=CC(=O)Oc2c(C)c3oc(C)cc3cc12	IC50	=	Not Active	-1	MAP kinase ERK2	Ext Val	-1	0.9023	0.0977	In
Cpd1312	CHEMBL93	CC(N(O)C(=O)N)c1cc2ccccc2s1	IC50	=	Not Active	-1	MAP kinase ERK2	Ext Val	-1	0.9487	0.0513	In
Cpd1317	CHEMBL1754	CCN1CC(CCN2CCOCC2)C(C1=O)(c3ccccc3)c4ccccc4	IC50	=	Not Active	-1	MAP kinase ERK2	Ext Val	-1	0.9943	0.0057	In
Cpd1319	CHEMBL1651521	COc1cc(O)c2C(=O)O[C@@H](C)C\C=C/C(=O)C[C@@H](O)CCCc2c1	IC50	=	6400	-1	MAP kinase ERK2	Ext Val	-1	0.9535	0.0465	In
Cpd1320	CHEMBL188921	COc1cc(OC)c(C(=O)CCCN2CCCC2)c(OC)c1	IC50	=	Not Active	-1	MAP kinase ERK2	Ext Val	-1	0.9896	0.0104	In
Cpd1321	CHEMBL1108	Fc1ccc(cc1)C(=O)CCCN2CCC(=CC2)N3C(=O)Nc4ccccc34	IC50	=	Not Active	-1	MAP kinase ERK2	Ext Val	1	0.3512	0.6488	In
Cpd1322	CHEMBL3298567	Cc1onc(C)c1Nc2ncc3CCN(Cc3n2)C(=O)N[C@H](CO)c4ccc(F)c(Cl)c4	IC50	=	25.9	1	MAP kinase ERK2	Ext Val	1	0.0212	0.9788	In
Cpd1323	CHEMBL3979742	C[C@@H](CO)Nc1ncc2CCN(Cc2n1)C(=O)NCc3oc4ccccc4n3	IC50	=	52.8	1	MAP kinase ERK2	Ext Val	1	0.0835	0.9165	In
Cpd1324	CHEMBL3909547	CC(C)Nc1ncc2CCN(Cc2n1)C(=O)N[C@@H]3CN(C)C[C@H]3c4ccc(c(F)c4)C(F)(F)F	IC50	=	1.6	1	MAP kinase ERK2	Ext Val	1	0.0972	0.9028	In
Cpd1325	CHEMBL3954135	COCCOC[C@@H](NC(=O)N1CCc2cnc(N[C@@H](C)CO)nc2C1)c3ccc(F)c(Cl)c3	IC50	=	17.7	1	MAP kinase ERK2	Ext Val	1	0.0856	0.9144	In
Cpd1329	CHEMBL3361128	Oc1ccc(\C=C/2\Oc3ccccc3C2=O)cc1O	IC50	=	100000	-1	MAP kinase ERK2	Ext Val	-1	0.8405	0.1595	In
Cpd1337	CHEMBL4108835	COCC(=O)OC[C@@H](NC(=O)N1CCc2cnc(NC3CCOCC3)nc2C1)c4ccc(F)c(Cl)c4	IC50	=	5.3	1	MAP kinase ERK2	Ext Val	1	0.0625	0.9375	In
Cpd1338	CHEMBL4106654	Fc1ccc(cc1Cl)[C@@H](CC#N)NC(=O)N2CCc3cnc(NC4CCOCC4)nc3C2	IC50	=	0.6	1	MAP kinase ERK2	Ext Val	1	0.1057	0.8943	In
Cpd1339	CHEMBL3910497	C[C@@H](CO)Nc1ncc2CCN(Cc2n1)C(=O)NCc3ccc(Cl)c(Cl)c3	IC50	=	2.1	1	MAP kinase ERK2	Ext Val	1	0.0456	0.9544	In
Cpd1340	CHEMBL3937485	CC(C)Nc1ncc2CCN(Cc2n1)C(=O)NC(CCN)c3ccc(cc3)C(F)(F)F	IC50	=	1.8	1	MAP kinase ERK2	Ext Val	1	0.0465	0.9535	In
Cpd1342	CHEMBL2012519	COc1cc(O)c2C(=O)O[C@@H](C)C\C=C/C(=O)[C@@H](O)[C@@H](O)CCCc2c1	IC50	=	950	-1	MAP kinase ERK2	Ext Val	-1	0.9365	0.0635	In
Cpd1345	CHEMBL1644626	O=C1NN=C(N1c2ccc3ccccc3c2)c4ccnc(Nc5cccnc5)c4	IC50	=	14000	-1	MAP kinase ERK2	Ext Val	1	0.0153	0.9847	In
Cpd1347	CHEMBL383104	CCCCNC(=O)N1Cc2n[nH]c(NC(=O)Cc3ccc(cc3)N4CCCC4)c2C1	IC50	=	280	1	MAP kinase ERK2	Ext Val	1	0.0812	0.9188	In
Cpd1350	CHEMBL657	CN(C)CCOC(c1ccccc1)c2ccccc2	IC50	=	Not Active	-1	MAP kinase ERK2	Ext Val	-1	0.9606	0.0394	In
Cpd1354	CHEMBL293492	O=C\C=C\c1ccccc1	IC50	=	Not Active	-1	MAP kinase ERK2	Ext Val	-1	0.9636	0.0364	In
Cpd1355	CHEMBL276832	NNc1nncc2ccccc12	IC50	=	Not Active	-1	MAP kinase ERK2	Ext Val	-1	0.8805	0.1195	In
Cpd1356	CHEMBL242237	NC(=O)c1ccccc1Nc2ccnc(Nc3cccc(O)c3)n2	IC50	=	25000	-1	MAP kinase ERK2	Ext Val	1	0.0892	0.9108	In
Cpd1357	CHEMBL437002	Fc1ccccc1C(=O)N2CCC(Cc3ccccc3)CC2	IC50	=	Not Active	-1	MAP kinase ERK2	Ext Val	-1	0.6923	0.3077	In
Cpd1359	CHEMBL106	OC(Cn1cncn1)(Cn2cncn2)c3ccc(F)cc3F	IC50	=	Not Active	-1	MAP kinase ERK2	Ext Val	-1	0.9734	0.0266	In
Cpd1360	CHEMBL41543	NC(=O)N1c2ccccc2CCc3ccccc13	IC50	=	Not Active	-1	MAP kinase ERK2	Ext Val	-1	0.6911	0.3089	In
Cpd1361	CHEMBL291338	Oc1c(Cl)cc(Cl)cc1C(=O)Nc2ccc(Cl)c(Cl)c2	IC50	=	886	-1	MAP kinase ERK2	Ext Val	-1	0.8213	0.1787	In
Cpd1362	CHEMBL1909051	FC(F)(F)c1ccccc1C(=O)N2CCC(Cc3ccccc3)CC2	IC50	=	Not Active	-1	MAP kinase ERK2	Ext Val	-1	0.8057	0.1943	In
Cpd1363	CHEMBL2408790	COc1cccc(F)c1CN2CCC[C@H](C2)NC(=O)Nc3cc4[nH]nc(c5ccnc(C)c5)c4cn3	IC50	=	0.2857	1	MAP kinase ERK2	Ext Val	1	0.0095	0.9905	In
Cpd1364	CHEMBL561708	COC(=O)Nc1ccc(cc1)c2nc(N3CCOCC3)c4cnn(C5CCN(CC5)C(=O)OC)c4n2	IC50	>	50000	-1	MAP kinase ERK2	Ext Val	-1	0.8466	0.1534	Outlier
Cpd1366	CHEMBL1200396	Cl.CCCCN1CCCCC1C(=O)Nc2c(C)cccc2C	IC50	=	Not Active	-1	MAP kinase ERK2	Ext Val	-1	0.9536	0.0464	In
Cpd1368	CHEMBL247798	CCNC(=O)Nc1ccc(CNc2ncsc2C(=O)Nc3ccc4OC(F)(F)Oc4c3)cn1	IC50	=	824	-1	MAP kinase ERK2	Ext Val	-1	0.5323	0.4677	In
Cpd1369	CHEMBL1456	COc1c(C)c2COC(=O)c2c(O)c1C\C=C(/C)\CCC(=O)OCCN3CCOCC3	IC50	=	Not Active	-1	MAP kinase ERK2	Ext Val	-1	0.9827	0.0173	In
Cpd1370	CHEMBL1428	COCCOC(=O)C1=C(C)NC(=C(C1c2cccc(c2)[N+](=O)[O-])C(=O)OC(C)C)C	IC50	=	Not Active	-1	MAP kinase ERK2	Ext Val	-1	0.9867	0.0133	In
Cpd1373	CHEMBL3654742	C[C@@H](NC(=O)Nc1cc2[nH]nc(c3cnnc(C)c3)c2cn1)c4ccccc4	IC50	=	0.8779	1	MAP kinase ERK2	Ext Val	1	0.0083	0.9917	In
Cpd1374	CHEMBL3695653	CCNC(=O)Nc1ccc2ncc(Nc3ccc(C)c(O)c3)nc2n1	IC50	>	100000	-1	MAP kinase ERK2	Ext Val	1	0.0664	0.9336	In
Cpd1375	CHEMBL440356	Brc1cc2C(=O)CCNC(=O)c2[nH]1	IC50	=	539	-1	MAP kinase ERK2	Ext Val	-1	0.9963	0.0037	In
Cpd1376	CHEMBL3654866	COCC(NC(=O)Nc1cc2[nH]nc(c3ccnc(C)c3)c2cn1)c4ccc(cn4)C(F)(F)F	IC50	=	24.2	1	MAP kinase ERK2	Ext Val	1	0.017	0.983	In
Cpd1377	CHEMBL3654881	C[C@@H](NC(=O)Nc1cc2[nH]nc(c3ccc(nc3)N4CCOCC4)c2cn1)c5ccc(F)cc5	IC50	=	0.7832	1	MAP kinase ERK2	Ext Val	1	0.0068	0.9932	In
Cpd1378	CHEMBL3654865	CC(CC1CCCO1)NC(=O)Nc2cc3[nH]nc(c4ccnc(C)c4)c3cn2	IC50	=	5.883	1	MAP kinase ERK2	Ext Val	1	0.1127	0.8873	In
Cpd1379	CHEMBL3654788	COC[C@@H](NC(=O)Nc1cc2[nH]nc(C3CC3)c2cn1)c4ccc(F)cc4	IC50	=	2.149	1	MAP kinase ERK2	Ext Val	1	0.034	0.966	In
Cpd1380	CHEMBL3654795	COC[C@@H](NC(=O)Nc1cc2[nH]nc(c2cn1)C(F)(F)F)c3ccccc3	IC50	=	458.3	1	MAP kinase ERK2	Ext Val	1	0.0422	0.9578	In
Cpd1381	CHEMBL3654748	C[C@@H](NC(=O)Nc1cc2[nH]nc(C(=O)NCc3nc4ccncc4[nH]3)c2cn1)c5ccccc5	IC50	=	5.473	1	MAP kinase ERK2	Ext Val	1	0.0075	0.9925	In
Cpd1382	CHEMBL3654752	C[C@@H](NC(=O)Nc1cc2[nH]nc(C(=O)NCC3CCOC3)c2cn1)c4ccccc4	IC50	=	3.826	1	MAP kinase ERK2	Ext Val	1	0.0435	0.9565	In
Cpd1383	CHEMBL3654756	C[C@@H](NC(=O)Nc1cc2[nH]nc(C(=O)NCC(F)(F)CN3CCOCC3)c2cn1)c4ccccc4	IC50	=	6.533	1	MAP kinase ERK2	Ext Val	1	0.0281	0.9719	In
Cpd1384	CHEMBL3654760	CO[C@H]1CN(C[C@@H]1O)C(=O)c2n[nH]c3cc(NC(=O)N[C@H](C)c4ccccc4)ncc23	IC50	=	1968	-1	MAP kinase ERK2	Ext Val	1	0.0529	0.9471	In
Cpd1385	CHEMBL3654775	C[C@@H](NC(=O)Nc1cc2[nH]nc(C3CCC3)c2cn1)c4ccccc4	IC50	=	2.442	1	MAP kinase ERK2	Ext Val	1	0.0345	0.9655	In
Cpd1386	CHEMBL3658729	Cc1cc(ccn1)c2n[nH]c3cc(NC(=O)NC(CO)c4cc(F)cc(F)c4)ncc23	IC50	=	0.6026	1	MAP kinase ERK2	Ext Val	1	0.0127	0.9873	In
Cpd1387	CHEMBL3658744	Cc1cc(ccn1)c2n[nH]c3cc(NC(=O)NC4CCCC(O)C4)ncc23	IC50	=	6.177	1	MAP kinase ERK2	Ext Val	1	0.0956	0.9044	In
Cpd1388	CHEMBL3658745	CC(=O)OC1CCCC(C1)NC(=O)Nc2cc3[nH]nc(c4ccnc(C)c4)c3cn2	IC50	=	6.712	1	MAP kinase ERK2	Ext Val	1	0.3279	0.6721	In
Cpd1389	CHEMBL3658831	Cc1cc(ccn1)c2n[nH]c3cc(NC(=O)NCC4CCCCO4)ncc23	IC50	=	1.207	1	MAP kinase ERK2	Ext Val	1	0.0868	0.9132	In
Cpd1391	CHEMBL4109290	CCNc1n[nH]c2cc(NC(=O)N[C@H](C)c3ccc(Cl)cc3)ncc12	IC50	=	12	1	MAP kinase ERK2	Ext Val	1	0.0313	0.9687	In
Cpd1392	CHEMBL4111832	CCNc1n[nH]c2cc(NC(=O)N[C@H](C)c3ccc(Cl)c(C)c3)ncc12	IC50	=	2	1	MAP kinase ERK2	Ext Val	1	0.0248	0.9752	In
Cpd1393	CHEMBL4114649	C[C@@H](NC(=O)Nc1cc2[nH]nc(N)c2cn1)c3ccccc3	IC50	=	18.1	1	MAP kinase ERK2	Ext Val	1	0.0255	0.9745	In
Cpd1394	CHEMBL3895058	Nc1n[nH]c2cc(NC(=O)N[C@@H](c3ccccc3)C4(O)CCCC4)ncc12	IC50	=	0.4	1	MAP kinase ERK2	Ext Val	1	0.0327	0.9673	In
Cpd1397	CHEMBL3898646	COc1ccccc1CNC(=O)Nc2cc3[nH]nc(N)c3cn2	IC50	=	10.7	1	MAP kinase ERK2	Ext Val	1	0.0315	0.9685	In
Cpd1398	CHEMBL3954406	COc1cccc(F)c1CNC(=O)Nc2cc3[nH]nc(N)c3cn2	IC50	=	3.3	1	MAP kinase ERK2	Ext Val	1	0.0345	0.9655	In
Cpd1399	CHEMBL3910892	CCNc1n[nH]c2cc(NC(=O)NC(C)c3ccc(F)nc3)ncc12	IC50	=	34.2	1	MAP kinase ERK2	Ext Val	1	0.0837	0.9163	In
Cpd1400	CHEMBL4106736	COC[C@@H](NC(=O)Nc1cc2[nH]nc(NC(=O)OC)c2cn1)c3ccc(F)cc3	IC50	=	1.1	1	MAP kinase ERK2	Ext Val	1	0.0343	0.9657	In
Cpd1401	CHEMBL4111360	COC(=O)Nc1n[nH]c2cc(NC(=O)N[C@H](C)c3cccc(F)c3)ncc12	IC50	=	1.6	1	MAP kinase ERK2	Ext Val	1	0.0327	0.9673	In
Cpd1402	CHEMBL3663083	CO[C@@H](C)CNC(=O)Nc1cc2[nH]nc(c3ccc(F)cc3)c2cn1	IC50	=	0.8733	1	MAP kinase ERK2	Ext Val	1	0.0897	0.9103	In
Cpd1404	CHEMBL3663071	C[C@H](CNC(=O)Nc1cc2[nH]nc(c3ccnc(C)c3)c2cn1)c4ccccc4	IC50	=	0.7895	1	MAP kinase ERK2	Ext Val	1	0.0117	0.9883	In
Cpd1405	CHEMBL3663072	C[C@@H](NC(=O)Nc1cc2[nH]nc(c3cnn(c3)C4COC4)c2cn1)c5ccccc5	IC50	=	1.926	1	MAP kinase ERK2	Ext Val	1	0.0455	0.9545	In
Cpd1406	CHEMBL4107672	C[C@@H](NC(=O)Nc1cc2[nH]nc(NCCN3CCOCC3)c2cn1)c4ccccc4	IC50	=	28.4	1	MAP kinase ERK2	Ext Val	1	0.0381	0.9619	In
Cpd1407	CHEMBL4109742	C[C@@H](NC(=O)Nc1cc2[nH]nc(NCC3CCCCO3)c2cn1)c4ccccc4	IC50	=	27.9	1	MAP kinase ERK2	Ext Val	1	0.026	0.974	In
Cpd1408	CHEMBL4112304	C[C@@H](NC(=O)Nc1cc2[nH]nc(NC(=O)C3CCCC3)c2cn1)c4ccccc4	IC50	=	1.2	1	MAP kinase ERK2	Ext Val	1	0.0433	0.9567	In
Cpd1409	CHEMBL3909027	CCNc1n[nH]c2cc(NC(=O)NCc3c(C)cccc3Cl)ncc12	IC50	=	11.3	1	MAP kinase ERK2	Ext Val	1	0.0398	0.9602	In
Cpd1418	CHEMBL1933576	CN1CCN(CC1)c2ccc(OC(F)(F)F)c(Nc3nccc(n3)c4cc(cn4C)C(=O)N)c2	IC50	>	10000	-1	MAP kinase ERK2	Ext Val	1	0.0836	0.9164	In
Cpd1419	CHEMBL4108943	C[C@@H](NC(=O)N1CCc2cnc(NC3CN(C)C(=O)C3)nc2C1)c4ccc(Cl)c(F)c4	IC50	=	20.1	1	MAP kinase ERK2	Ext Val	1	0.0721	0.9279	In
Cpd1420	CHEMBL3969711	Fc1ccc(cc1F)[C@@H]2CN(CC#N)C[C@H]2NC(=O)N3CCc4cnc(NC5CCOCC5)nc4C3	IC50	=	4	1	MAP kinase ERK2	Ext Val	1	0.0691	0.9309	In
Cpd1421	CHEMBL3916390	Fc1cc(ccc1Cl)[C@H](NC(=O)N2CCc3cnc(NC4CCOCC4)nc3C2)c5ocnn5	IC50	=	2.4	1	MAP kinase ERK2	Ext Val	1	0.0231	0.9769	In
Cpd1422	CHEMBL4110141	CC1CC(CCO1)Nc2ncc3CCN(Cc3n2)C(=O)N[C@H](CO)c4ccc(Cl)c(F)c4	IC50	=	2.39	1	MAP kinase ERK2	Ext Val	1	0.0279	0.9721	In
Cpd1423	CHEMBL3663054	COCCNC(=O)Nc1cc2[nH]nc(c3ccnc(OC(C)C)c3)c2cn1	IC50	=	16.05	1	MAP kinase ERK2	Ext Val	1	0.1085	0.8915	In
Cpd1427	CHEMBL14192	C(c1ccccc1)n2ccnc2	IC50	=	Not Active	-1	MAP kinase ERK2	Ext Val	-1	0.9603	0.0397	In
Cpd1438	CHEMBL3628375	c1cc(ccn1)c2cnc3[nH]cc(c4cn[nH]c4)c3n2	IC50	=	354	1	MAP kinase ERK2	Ext Val	-1	0.8237	0.1763	In
Cpd1439	CHEMBL3356128	CC(=O)c1ccc(cc1)N2CCN(CC2)C(=O)CN3CC[C@H](C3)C(=O)Nc4ccc(O)c(F)c4	IC50	=	11600	-1	MAP kinase ERK2	Ext Val	-1	0.751	0.249	In
Cpd1441	CHEMBL3962160	CCn1ncc2cc3NC(=O)N[C@H](COC[C@@H](O)Cc(n3)c12)c4cccc(F)c4	IC50	=	14.49	1	MAP kinase ERK2	Ext Val	1	0.2072	0.7928	In
Cpd1443	CHEMBL332551	Nc1nc(C2=C3C(=Nc4ccccc34)C(=O)NCC2)c(O)[nH]1	IC50	=	89	1	MAP kinase ERK2	Ext Val	-1	0.9883	0.0117	In
Cpd1444	CHEMBL3893222	CCn1ncc2cc3NC(=O)N[C@@H]([C@@H](OCCCc(n3)c12)[C@@H](C)O)c4ccccc4	IC50	=	687.3	-1	MAP kinase ERK2	Ext Val	1	0.1551	0.8449	In
Cpd1446	CHEMBL425904	CC(CN(C)C)Oc1ccc(Cl)cc1NC(=O)Nc2cnc(cn2)C#N	IC50	>	50000	-1	MAP kinase ERK2	Ext Val	-1	0.7433	0.2567	In
Cpd1449	CHEMBL558	CC(N)COc1c(C)cccc1C	IC50	=	Not Active	-1	MAP kinase ERK2	Ext Val	-1	0.9905	0.0095	In
Cpd1451	CHEMBL18701	CCCCOc1cc(CC2CNC(=O)N2)ccc1OC	IC50	=	Not Active	-1	MAP kinase ERK2	Ext Val	-1	0.8746	0.1254	In
Cpd1452	CHEMBL3398599	CCc1cnc(nc1)c2ccc(cc2)N3CCN(CC3)C(=O)CN4CC[C@H](C4)C(=O)Nc5ccc(O)c(Cl)c5	IC50	=	100	1	MAP kinase ERK2	Ext Val	1	0.0691	0.9309	In
Cpd1460	CHEMBL1922209	CCC(O)[C@H](CC)Nc1nc(NCc2cccnc2)c3ncn(C(C)C)c3n1	IC50	=	17000	-1	MAP kinase ERK2	Ext Val	-1	0.8147	0.1853	In
Cpd1461	CHEMBL511	COc1ccc(CN(CCN(C)C)c2ccccn2)cc1	IC50	=	Not Active	-1	MAP kinase ERK2	Ext Val	-1	0.8801	0.1199	In
Cpd1462	CHEMBL1306	CC(C)N1CCN(CC1)c2ccc(OC[C@H]3CO[C@@](Cn4cncn4)(O3)c5ccc(Cl)cc5Cl)cc2	IC50	=	Not Active	-1	MAP kinase ERK2	Ext Val	-1	0.782	0.218	In
Cpd1465	CHEMBL1650551	Cl.[2H]C([2H])(N1CCC(F)(F)C1)c2cc(Nc3nc(C)cn4c(cnc34)c5cn[nH]c5)sn2	IC50	>	100	-1	MAP kinase ERK2	Ext Val	-1	0.5041	0.4959	In
Cpd1466	CHEMBL1592	CCOC(=O)[C@H](CCc1ccccc1)N[C@@H](C)C(=O)N2Cc3ccccc3C[C@H]2C(=O)O	IC50	=	Not Active	-1	MAP kinase ERK2	Ext Val	-1	0.6608	0.3392	In
Cpd1467	CHEMBL1760	CC(C)(C)NCC(O)c1cc(O)cc(O)c1	IC50	=	Not Active	-1	MAP kinase ERK2	Ext Val	-1	0.9968	0.0032	In
Cpd1468	CHEMBL2107797	CC[C@]12CC[C@H]3[C@@H](CCC4=CC(=O)CC[C@H]34)[C@@H]1CCC2(O)C#C	IC50	=	Not Active	-1	MAP kinase ERK2	Ext Val	-1	0.9274	0.0726	In
Cpd1469	CHEMBL2079587	C[C@]1(O)CC[C@H]2[C@@H]3CC[C@H]4Cc5n[nH]cc5C[C@]4(C)[C@H]3CC[C@]12C	IC50	=	Not Active	-1	MAP kinase ERK2	Ext Val	-1	0.937	0.063	In
Cpd1472	CHEMBL611	COc1cc2nc(nc(N)c2cc1OC)N3CCN(CC3)C(=O)C4CCCO4	IC50	=	Not Active	-1	MAP kinase ERK2	Ext Val	-1	0.8439	0.1561	In
Cpd1473	CHEMBL241694	C[C@]12CCC(=O)C=C1CC[C@@H]3[C@@H]2CC[C@@]4(C)[C@H]3CC[C@@]4(O)C#C	IC50	=	Not Active	-1	MAP kinase ERK2	Ext Val	-1	0.9494	0.0506	In
Cpd1474	CHEMBL1255834	CC(N)Cc1c[nH]c2ccc(OCc3cccs3)cc12	IC50	=	Not Active	-1	MAP kinase ERK2	Ext Val	-1	0.9653	0.0347	In
Cpd1476	CHEMBL1219	COCCCOc1ccnc(C[S+]([O-])c2nc3ccccc3[nH]2)c1C	IC50	=	Not Active	-1	MAP kinase ERK2	Ext Val	-1	0.6848	0.3152	In
Cpd1481	CHEMBL52440	COc1ccc2C[C@H]3[C@H]4CCCC[C@@]4(CCN3C)c2c1	IC50	=	Not Active	-1	MAP kinase ERK2	Ext Val	-1	0.998	0.002	In
Cpd1482	CHEMBL50588	CC[C@H]1CN2CCc3cc(OC)c(OC)cc3[C@@H]2C[C@@H]1C[C@H]4NCCc5cc(OC)c(OC)cc45	IC50	=	Not Active	-1	MAP kinase ERK2	Ext Val	-1	0.9583	0.0417	In
Cpd1483	CHEMBL1902981	CCc1ccc(cc1)C(=O)C(C)CN2CCCCC2	IC50	=	Not Active	-1	MAP kinase ERK2	Ext Val	-1	0.9567	0.0433	In
Cpd1485	CHEMBL6273	CN1CCN(CC1)c2c(F)cc3C(=O)C(=CN(CCF)c3c2F)C(=O)O	IC50	=	Not Active	-1	MAP kinase ERK2	Ext Val	-1	0.9969	0.0031	In
Cpd1491	CHEMBL3970548	COc1n[nH]c2cc(NC(=O)N[C@H]([C@H](C)O)c3ccc(F)cc3)nc(CO)c12	IC50	=	3.4	1	MAP kinase ERK2	Ext Val	1	0.0786	0.9214	In
Cpd1492	CHEMBL4113494	CCOc1n[nH]c2cc(NC(=O)N[C@H]([C@@H](C)O)c3ccccc3)nc(CO)c12	IC50	=	0.4	1	MAP kinase ERK2	Ext Val	1	0.0797	0.9203	In
Cpd1493	CHEMBL3978911	CC(C)(O)[C@@H](NC(=O)Nc1cc2[nH]nc(OCCOC(F)(F)F)c2cn1)c3ccccc3	IC50	=	0.8	1	MAP kinase ERK2	Ext Val	-1	0.5263	0.4737	In
Cpd1494	CHEMBL4109588	C[C@@H](NC(=O)Nc1cc2[nH]nc(Nc3ccc(nc3)C#N)c2cn1)c4ccccc4	IC50	=	367	1	MAP kinase ERK2	Ext Val	1	0.0389	0.9611	In
Cpd1495	CHEMBL3940179	C[C@H](O)[C@@H](NC(=O)Nc1cc2[nH]nc(N3CCc4ncsc4C3)c2cn1)c5ccccc5	IC50	=	34.6	1	MAP kinase ERK2	Ext Val	1	0.038	0.962	In
Cpd1496	CHEMBL3905499	COC(=O)Nc1n[nH]c2cc(NC(=O)NC(c3ocnc3)c4ccc(Cl)c(Cl)c4)ncc12	IC50	=	2.6	1	MAP kinase ERK2	Ext Val	1	0.0223	0.9777	In
Cpd1497	CHEMBL4112896	C[C@@H](O)[C@@H](NC(=O)Nc1cc2[nH]nc(N3CCc4nn(C)cc4C3)c2cn1)c5ccccc5	IC50	=	0.4	1	MAP kinase ERK2	Ext Val	1	0.0691	0.9309	In
Cpd1498	CHEMBL3902207	CNC(=O)C(NC(=O)Nc1cc2[nH]nc(OC)c2cn1)c3ccc(F)cc3	IC50	=	276.8	1	MAP kinase ERK2	Ext Val	1	0.0525	0.9475	In
Cpd1499	CHEMBL3947614	CCNc1n[nH]c2cc(NC(=O)NC(C)c3cccnc3)ncc12	IC50	=	44.4	1	MAP kinase ERK2	Ext Val	1	0.0885	0.9115	In
Cpd1500	CHEMBL3909324	COc1n[nH]c2cc(NC(=O)N[C@@H](c3ccccn3)C(C)(C)O)nc(CO)c12	IC50	=	164.4	1	MAP kinase ERK2	Ext Val	1	0.1527	0.8473	In
Cpd1501	CHEMBL4108015	COc1n[nH]c2cc(NC(=O)N[C@H](c3ccccn3)C(C)(C)O)nc(CO)c12	IC50	=	1013	-1	MAP kinase ERK2	Ext Val	1	0.1527	0.8473	In
Cpd1502	CHEMBL3953831	COc1n[nH]c2cc(NC(=O)N[C@H]([C@H](O)C(C)C)c3ccccc3)nc(CO)c12	IC50	=	1172	-1	MAP kinase ERK2	Ext Val	1	0.0762	0.9238	In
Cpd1503	CHEMBL3972200	COCCOc1n[nH]c2cc(NC(=O)N[C@@H](c3ccc(F)cc3)C(C)(C)O)ncc12	IC50	=	0.5	1	MAP kinase ERK2	Ext Val	1	0.0755	0.9245	In
Cpd1504	CHEMBL3975320	CC1CC(CC(C)O1)Oc2n[nH]c3cc(NC(=O)N[C@@H](c4ccccc4)C(C)(C)O)ncc23	IC50	=	1	1	MAP kinase ERK2	Ext Val	1	0.0458	0.9542	In
Cpd1505	CHEMBL3966700	CC(C)(O)[C@@H](NC(=O)Nc1cc2[nH]nc(OCCOC(F)F)c2cn1)c3ccccc3	IC50	=	0.4	1	MAP kinase ERK2	Ext Val	1	0.057	0.943	In
Cpd1507	CHEMBL4106550	Fc1ccc(cc1Cl)[C@H](NC(=O)c2ccc3cnc(NC4CCOCC4)nc3c2)[C@@H]5CCNC5	IC50	=	6.7	1	MAP kinase ERK2	Ext Val	1	0.1148	0.8852	In
Cpd1514	CHEMBL3971487	Nc1ncc(nc1c2ccc(C(=O)NCCc3ccccc3)c(F)c2)C4CCOCC4	IC50	=	8.29	1	MAP kinase ERK2	Ext Val	1	0.0663	0.9337	In
Cpd1516	CHEMBL3967841	Cc1cccc(CNC(=O)c2ccc(cc2F)c3nc(cnc3N)C4CCOCC4)n1	IC50	=	25.2	1	MAP kinase ERK2	Ext Val	1	0.0894	0.9106	In
Cpd1523	CHEMBL1651522	COc1cc(O)c2C(=O)O[C@@H](C)C\C=C\C(=O)C[C@@H](O)CCCc2c1	IC50	>	10000	-1	MAP kinase ERK2	Ext Val	-1	0.9535	0.0465	In
Cpd1524	CHEMBL4112955	C[C@@H](NC(=O)Nc1cc2[nH]nc(NC3=CC(=O)CC3)c2cn1)c4ccccc4	IC50	=	39.2	1	MAP kinase ERK2	Ext Val	1	0.022	0.978	In
Cpd1525	CHEMBL4106611	C[C@@H](NC(=O)Nc1cc2[nH]nc(NC3CC(C)OC3C)c2cn1)c4ccccc4	IC50	=	7.4	1	MAP kinase ERK2	Ext Val	1	0.0259	0.9741	In
Cpd1526	CHEMBL4108214	C[C@@H](NC(=O)Nc1cc2[nH]nc(N[C@H]3COC[C@H]3F)c2cn1)c4ccccc4	IC50	=	0.8	1	MAP kinase ERK2	Ext Val	1	0.0233	0.9767	In
Cpd1534	CHEMBL3907795	Nc1ncc(nc1c2ccc(C(=O)NCc3ccccc3)c(F)c2)C4CCC(=O)NC4	IC50	=	4.79	1	MAP kinase ERK2	Ext Val	1	0.1772	0.8228	In
Cpd1535	CHEMBL3948938	COC(=O)Nc1n[nH]c2cc(NC(=O)N[C@@H](c3ccc(F)cc3)C(C)(C)O)ncc12	IC50	=	0.5	1	MAP kinase ERK2	Ext Val	1	0.0358	0.9642	In
Cpd1536	CHEMBL4111834	COC(=O)Nc1n[nH]c2cc(NC(=O)N[C@@H]3[C@H](O)CCOc4ccccc34)ncc12	IC50	=	0.3	1	MAP kinase ERK2	Ext Val	1	0.0398	0.9602	In
Cpd1537	CHEMBL3934614	COCCNC(=O)Nc1cc2[nH]nc(OC)c2c(COC)n1	IC50	=	524.6	-1	MAP kinase ERK2	Ext Val	-1	0.7066	0.2934	In
Cpd1538	CHEMBL4108242	C[C@@H](NC(=O)Nc1cc2[nH]nc(NC(=O)OC3CCOC3)c2cn1)c4ccc(F)cc4	IC50	=	15.3	1	MAP kinase ERK2	Ext Val	1	0.019	0.981	In
Cpd1539	CHEMBL3928522	CC(C)(O)[C@@H](NC(=O)Nc1cc2[nH]nc(NC(=O)OCC(F)F)c2cn1)c3ccc(F)cc3	IC50	=	1.5	1	MAP kinase ERK2	Ext Val	1	0.0102	0.9898	In
Cpd1540	CHEMBL4111991	C[C@@H](NC(=O)Nc1cc2[nH]nc(OCCn3cccn3)c2cn1)c4ccccc4	IC50	=	8.7	1	MAP kinase ERK2	Ext Val	1	0.0396	0.9604	In
Cpd1589	CHEMBL1682011	Cc1csc(NC(=O)Cc2cccc3ncccc23)c1c4ncn[nH]4	IC50	>	50000	-1	MAP kinase ERK2	Ext Val	-1	0.8952	0.1048	In
Cpd1608	CHEMBL49080	CC(C)(C)NCC(O)c1cc(Cl)c(N)c(Cl)c1	IC50	=	Not Active	-1	MAP kinase ERK2	Ext Val	-1	0.9976	0.0024	In
Cpd1669	CHEMBL3628256	c1cc(ccn1)c2cnc3[nH]ccc3n2	IC50	=	11700	-1	MAP kinase ERK2	Ext Val	-1	0.9256	0.0744	In
Cpd1670	CHEMBL3628362	Cn1cc(cn1)c2cnc3[nH]ccc3n2	IC50	=	22500	-1	MAP kinase ERK2	Ext Val	-1	0.9849	0.0151	In
Cpd1675	CHEMBL3356129	CC(=O)c1ccc(cc1)N2CCN(CC2)C(=O)CN3CC[C@H](C3)C(=O)Nc4ccc(O)c(C)c4	IC50	=	4200	-1	MAP kinase ERK2	Ext Val	-1	0.673	0.327	In
Cpd1685	CHEMBL632	C[C@H]1C[C@H]2[C@@H]3CCC4=CC(=O)C=C[C@]4(C)[C@@]3(F)[C@@H](O)C[C@]2(C)[C@@]1(O)C(=O)CO	IC50	=	Not Active	-1	MAP kinase ERK2	Ext Val	-1	0.988	0.012	In
Cpd1686	CHEMBL14060	Oc1ccccc1	IC50	=	Not Active	-1	MAP kinase ERK2	Ext Val	-1	0.9945	0.0055	In
Cpd1689	CHEMBL1517	CN(C)[C@H]1[C@@H]2[C@@H](O)[C@H]3C(=C(O)[C@]2(O)C(=O)C(=C1O)C(=O)N)C(=O)c4c(O)cccc4[C@@]3(C)O	IC50	=	Not Active	-1	MAP kinase ERK2	Ext Val	-1	0.9978	0.0022	In
Cpd1690	CHEMBL1909072	NC(=O)C1CCN(CCCN2c3ccccc3Sc4ccc(Cl)cc24)CC1	IC50	=	Not Active	-1	MAP kinase ERK2	Ext Val	-1	0.9839	0.0161	In
Cpd1691	CHEMBL711	O=C1C(C(=O)c2ccccc12)c3ccccc3	IC50	=	Not Active	-1	MAP kinase ERK2	Ext Val	-1	0.9168	0.0832	In
Cpd1692	CHEMBL1255901	C\C=C\1/[C@@H]2CC3=C(C=CC(=O)N3)[C@]1(N)CC(=C2)C	IC50	=	Not Active	-1	MAP kinase ERK2	Ext Val	-1	0.9944	0.0056	In
Cpd1693	CHEMBL1479	C[C@]12Cc3cnoc3C=C1CC[C@@H]4[C@@H]2CC[C@@]5(C)[C@H]4CC[C@@]5(O)C#C	IC50	=	Not Active	-1	MAP kinase ERK2	Ext Val	-1	0.8483	0.1517	In
Cpd1694	CHEMBL1493	CC1=C(Oc2c(cccc2C1=O)C(=O)OCCN3CCCCC3)c4ccccc4	IC50	=	Not Active	-1	MAP kinase ERK2	Ext Val	-1	0.8486	0.1514	In
Cpd1695	CHEMBL1234833	CC(C)c1cnn2c(NCc3ccccc3)cc(N[C@@H](CO)[C@H](O)CO)nc12	IC50	=	3110	-1	MAP kinase ERK2	Ext Val	-1	0.9422	0.0578	In
Cpd1696	CHEMBL4112774	Cn1cc(cn1)[C@@H](NC(=O)c2ccc3cnc(N[C@H]4CCOC[C@H]4F)nc3c2)c5ccc(Cl)c(F)c5	IC50	=	2.5	1	MAP kinase ERK2	Ext Val	1	0.0723	0.9277	In
Cpd1698	CHEMBL3654697	CN(Cc1cccnc1)C(=O)Nc2cc3[nH]nc(c4ccnc(C)c4)c3cn2	IC50	=	762.9	-1	MAP kinase ERK2	Ext Val	1	0.0226	0.9774	In
Cpd1699	CHEMBL3955822	COc1ccc(cc1F)[C@H](NC(=O)c2cc(F)c3cnc(NCCC#N)nc3c2)c4cnn(C)c4	IC50	=	13.9	1	MAP kinase ERK2	Ext Val	1	0.4163	0.5837	In
Cpd1701	CHEMBL4109524	COc1n[nH]c2cc(NC(=O)N[C@H](C)c3ccccc3)nc(c4ccnc(C)n4)c12	IC50	=	8.9	1	MAP kinase ERK2	Ext Val	1	0.0789	0.9211	In
Cpd1710	CHEMBL3938196	Nc1ncc(nc1c2ccc(C(=O)N[C@H]3CCCN(Cc4ccccc4F)C3)c(F)c2)C5CCOCC5	IC50	=	2230	-1	MAP kinase ERK2	Ext Val	1	0.046	0.954	In
Cpd1711	CHEMBL3911903	Cn1cc(nn1)c2cnc(N)c(c2)c3ccc(C(=O)N[C@H](CO)c4cccc(Cl)c4)c(F)c3	IC50	=	0.835	1	MAP kinase ERK2	Ext Val	1	0.0137	0.9863	In
Cpd1712	CHEMBL4108926	CC(=O)NC[C@@H](NC(=O)c1ccc(cc1F)c2nc(cnc2N)C3CCOCC3)c4cc(F)cc(Br)c4	IC50	=	0.0201	1	MAP kinase ERK2	Ext Val	1	0.0843	0.9157	In
Cpd1715	CHEMBL3912072	Nc1ncc(nc1c2ccc(C(=O)N[C@H](CO)c3cccc(Cl)c3)c(F)c2)[C@@H]4CCC[C@H](O)C4	IC50	=	0.3	1	MAP kinase ERK2	Ext Val	1	0.024	0.976	In
Cpd1717	CHEMBL4110872	Cc1c(cnn1C)c2cnc(N)c(c2)c3ccc(C(=O)N[C@H](CO)c4cc(F)cc(CF)c4)c(F)c3	IC50	=	0.00875	1	MAP kinase ERK2	Ext Val	1	0.0397	0.9603	In
Cpd1727	CHEMBL3895902	CNC[C@@H](NC(=O)c1ccc(cc1F)c2nc(cnc2N)[C@H]3CC[C@H](O)C(F)(F)C3)c4cc(F)cc(Br)c4	IC50	=	0.0823	1	MAP kinase ERK2	Ext Val	1	0.0183	0.9817	In
Cpd1728	CHEMBL4110654	CCNC[C@@H](NC(=O)c1ccc(cc1F)c2nc(cnc2N)[C@@H]3CC[C@@H](O)CC3)c4cccc(Br)c4	IC50	=	0.0617	1	MAP kinase ERK2	Ext Val	1	0.0246	0.9754	In
Cpd1733	CHEMBL3970902	Cn1cc(cn1)[C@@H](NC(=O)c2cc(F)c3cnc(NC4CCOCC4)nc3c2)c5cccc(F)c5	IC50	=	1.3	1	MAP kinase ERK2	Ext Val	1	0.1351	0.8649	In
Cpd1734	CHEMBL4108953	Nc1ncc(cc1c2ccc(cc2)C(=O)N[C@H](CO)c3ccccc3)c4ccncc4	IC50	=	0.584	1	MAP kinase ERK2	Ext Val	1	0.0149	0.9851	In
Cpd1736	CHEMBL1270230	NC(=O)c1cc([nH]c1c2ccccc2)c3ccnc(N)n3	IC50	>	10000	-1	MAP kinase ERK2	Ext Val	1	0.4984	0.5016	In
Cpd1738	CHEMBL4109955	CSc1cc(F)cc(c1)[C@@H](CO)NC(=O)c2ccc(cc2F)c3nc(cnc3N)c4cn(C)nc4C	IC50	=	0.0153	1	MAP kinase ERK2	Ext Val	1	0.0545	0.9455	In
Cpd1740	CHEMBL3915594	COc1ccc(cc1F)[C@H](NC(=O)c2cc(F)c3cnc(NC4CCOCC4)nc3c2)c5cnn(C)c5	IC50	=	1.5	1	MAP kinase ERK2	Ext Val	1	0.1542	0.8458	In
Cpd1743	CHEMBL3944233	COc1ccc(cc1Cl)[C@H](NC(=O)c2ccc3cnc(NC4CCOCC4)nc3c2)c5cnn(C)c5	IC50	=	1	1	MAP kinase ERK2	Ext Val	1	0.1805	0.8195	In
Cpd1744	CHEMBL4110645	Cn1cc(cn1)[C@H](NC(=O)c2ccc3cnc(NC4CCOCC4)nc3c2)c5ccc(C#N)c(Cl)c5	IC50	=	25	1	MAP kinase ERK2	Ext Val	1	0.1197	0.8803	In
Cpd1750	CHEMBL783	CC(C)[C@@H]1CC[C@H](CC1)C(=O)N[C@H](Cc2ccccc2)C(=O)O	IC50	=	Not Active	-1	MAP kinase ERK2	Ext Val	-1	0.8802	0.1198	In
Cpd1752	CHEMBL1201193	CCCCN1CCCC[C@H]1C(=O)Nc2c(C)cccc2C	IC50	=	Not Active	-1	MAP kinase ERK2	Ext Val	-1	0.9536	0.0464	In
Cpd1753	CHEMBL1909076	N[C@H](CSC(=S)NCc1ccccc1)C(=O)O	IC50	=	Not Active	-1	MAP kinase ERK2	Ext Val	-1	0.9994	0.0006	In
Cpd1754	CHEMBL242273	C=CCc1ccc2OCOc2c1	IC50	=	Not Active	-1	MAP kinase ERK2	Ext Val	-1	0.9765	0.0235	In
Cpd1756	CHEMBL456807	NNc1ccccc1	IC50	=	Not Active	-1	MAP kinase ERK2	Ext Val	-1	0.8108	0.1892	In
Cpd1757	CHEMBL141343	Cc1c(C)c2OC(C)(CN3CCN(CC3)c4cc(nc(n4)N5CCCC5)N6CCCC6)CCc2c(C)c1O	IC50	=	Not Active	-1	MAP kinase ERK2	Ext Val	-1	0.5596	0.4404	In
Cpd1760	CHEMBL832	[O-][S+](CCC1C(=O)N(N(C1=O)c2ccccc2)c3ccccc3)c4ccccc4	IC50	=	Not Active	-1	MAP kinase ERK2	Ext Val	-1	0.7611	0.2389	In
Cpd1761	CHEMBL856	CCC1(C(=O)NCNC1=O)c2ccccc2	IC50	=	Not Active	-1	MAP kinase ERK2	Ext Val	-1	0.9974	0.0026	In
Cpd1787	CHEMBL3658777	CC[C@H](NC(=O)Nc1cc2[nH]nc(c3ccnc(C)c3)c2cn1)c4ccc(Cl)cc4	IC50	=	39.23	1	MAP kinase ERK2	Ext Val	1	0.0068	0.9932	In
Cpd1788	CHEMBL3658778	CC[C@@H](NC(=O)Nc1cc2[nH]nc(c3ccnc(C)c3)c2cn1)c4ccc(Cl)cc4	IC50	=	0.7549	1	MAP kinase ERK2	Ext Val	1	0.0068	0.9932	In
Cpd1790	CHEMBL3658842	Cc1cc(ccn1)c2n[nH]c3cc(NC(=O)NCc4ncccc4C)ncc23	IC50	=	1.221	1	MAP kinase ERK2	Ext Val	1	0.0206	0.9794	In
Cpd1791	CHEMBL3662948	Cc1cc(ccn1)c2n[nH]c3cc(NC(=O)NC4(CN)CCc5cc(F)ccc45)ncc23	IC50	=	25.97	1	MAP kinase ERK2	Ext Val	1	0.0107	0.9893	In
Cpd1792	CHEMBL3662949	Cc1cc(ccn1)c2n[nH]c3cc(NC(=O)Nc4noc5cccnc45)ncc23	IC50	=	0.4285	1	MAP kinase ERK2	Ext Val	1	0.0311	0.9689	In
Cpd1798	CHEMBL3658702	CN1CC(NC(Nc2cc3[nH]nc(c4ccnc(C)c4)c3cn2)O1)c5ccccc5	IC50	=	0.7388	1	MAP kinase ERK2	Ext Val	1	0.2002	0.7998	In
Cpd1799	CHEMBL3658709	Cc1cc(ccn1)c2n[nH]c3cc(NC(=O)NC4(CC4)c5ccc(F)cc5)ncc23	IC50	=	18.66	1	MAP kinase ERK2	Ext Val	1	0.0082	0.9918	In
Cpd1800	CHEMBL3658715	Cc1cc(ccn1)c2n[nH]c3cc(NC(=O)NC4(CC4)c5ccccc5)ncc23	IC50	=	10.56	1	MAP kinase ERK2	Ext Val	1	0.0087	0.9913	In
Cpd1801	CHEMBL3658717	Cc1cc(ccn1)c2n[nH]c3cc(NC(=O)NC4(CCC4)c5ccncc5)ncc23	IC50	=	30.22	1	MAP kinase ERK2	Ext Val	1	0.0112	0.9888	In
Cpd1803	CHEMBL3658720	Cc1cc(ccn1)c2n[nH]c3cc(NC(=O)NC4(CC4)c5ccncc5)ncc23	IC50	=	129.8	1	MAP kinase ERK2	Ext Val	1	0.0126	0.9874	In
Cpd1809	CHEMBL4108261	CC1N=CC=C1c2cnc(N)c(c2)c3ccc(C(=O)N[C@H](CO)c4cccc(F)c4)c(F)c3	IC50	=	1.47	1	MAP kinase ERK2	Ext Val	1	0.0201	0.9799	In
Cpd1810	CHEMBL3658793	Cc1cc(ccn1)c2n[nH]c3cc(NC(=O)NCc4cncs4)ncc23	IC50	=	2.768	1	MAP kinase ERK2	Ext Val	1	0.0457	0.9543	In
Cpd1813	CHEMBL4076347	CC[C@H](C)[C@H](NC(=O)[C@H](CO)NC(=O)[C@H](CO)NC(=O)[C@H](CCC(=O)O)NC(=O)[C@@H](NC(=O)[C@@H]1CCCN1C(=O)[C@H](CCCCN)NC(=O)[C@H](CC(C)C)NC(=O)[C@H](CCC(=O)N)NC(=O)[C@H](C)NC(=O)[C@@H](NC(=O)CCOCCOCCOCCOCCNC(=O)Cn2nc(N)c3cc(nnc23)c4c(nn5ccccc45)c6ccccc6)[C@@H](C)O)[C@@H](C)CC)C(=O)N[C@@H](CC(C)C)C(=O)N[C@@H](C)C(=O)N[C@@H](CCC(=O)N)C(=O)N[C@@H](CCCNC(=N)N)C(=O)N[C@@H](CCCNC(=N)N)C(=O)N[C@@H](C(C)C)C…	IC50	=	14	1	MAP kinase ERK2	Ext Val	-1	0.9997	0.0003	Outlier
Cpd1816	CHEMBL3185148	Nc1nc(NCCNc2ncc(c(n2)c3ccc(Cl)cc3Cl)n4ccnc4)ccc1[N+](=O)[O-]	IC50	>	10000	-1	MAP kinase ERK2	Ext Val	-1	0.8153	0.1847	In
Cpd1819	CHEMBL3945881	Nc1ncc(nc1c2ccc(C(=O)NCc3cccc(Cl)n3)c(F)c2)[C@@H]4CC[C@@H](O)CC4	IC50	=	21	1	MAP kinase ERK2	Ext Val	1	0.0469	0.9531	In
Cpd1822	CHEMBL3916284	Cn1cc(cn1)c2cnc(N)c(c2)c3ccc(C(=O)NCc4cccc(Br)c4)c(F)c3	IC50	=	1.52	1	MAP kinase ERK2	Ext Val	1	0.045	0.955	In
Cpd1823	CHEMBL4110831	Cn1cncc1c2cnc(N)c(c2)c3ccc(C(=O)N[C@H](CO)c4cccc(Cl)c4)c(F)c3	IC50	=	0.326	1	MAP kinase ERK2	Ext Val	1	0.0236	0.9764	In
Cpd1825	CHEMBL4111998	Cn1cc(cn1)c2cnc(N)c(c2)c3ccc(C(=O)N[C@H](CO)c4cc(F)cc(Cl)c4)c(F)c3	IC50	=	0.192	1	MAP kinase ERK2	Ext Val	1	0.0445	0.9555	In
Cpd1830	CHEMBL3654677	Cc1cc(ccn1)c2n[nH]c3cc(NC(=O)NCc4ccc(Cl)cc4)ncc23	IC50	=	0.5126	1	MAP kinase ERK2	Ext Val	1	0.0089	0.9911	In
Cpd1833	CHEMBL3658807	Cc1cc(ccn1)c2n[nH]c3cc(NC(=O)NCc4c(C)cccc4Cl)ncc23	IC50	=	1.116	1	MAP kinase ERK2	Ext Val	1	0.0067	0.9933	In
Cpd1841	CHEMBL1321	CNNCc1ccc(cc1)C(=O)NC(C)C	IC50	=	Not Active	-1	MAP kinase ERK2	Ext Val	-1	0.68	0.32	In
Cpd1843	CHEMBL207718	COc1cc2ncnc(Nc3cccc(Cl)c3F)c2cc1CN(C)C4(CN(C)C4)C(=O)N	IC50	>	10000	-1	MAP kinase ERK2	Ext Val	-1	0.7406	0.2594	In
Cpd1847	CHEMBL195029	COc1cc(Nc2c(cnc3cc4cc(OCCN5CCOCC5)c(OC)cc4cc23)C#N)c(Cl)cc1Cl	IC50	>	20000	-1	MAP kinase ERK2	Ext Val	1	0.0742	0.9258	In
Cpd1848	CHEMBL3654772	O=C(NCc1ccccc1)Nc2cc3[nH]nc(C4CC4)c3cn2	IC50	=	17.4	1	MAP kinase ERK2	Ext Val	1	0.0373	0.9627	In
Cpd1850	CHEMBL3654834	CN1C[C@H](NC(=O)Nc2cc3[nH]nc(c4ccnc(C)c4)c3cn2)[C@H](C1)c5ccccc5C	IC50	=	0.5374	1	MAP kinase ERK2	Ext Val	1	0.0112	0.9888	In
Cpd1852	CHEMBL3654852	CC(NC(=O)Nc1ncc2c(n[nH]c2c1F)c3ccnc(C)c3)c4ccccn4	IC50	=	2.448	1	MAP kinase ERK2	Ext Val	1	0.039	0.961	In
Cpd1864	CHEMBL3695643	CCNC(=O)Nc1ccc2ncc(nc2n1)c3ccc(C#N)s3	IC50	=	4900	-1	MAP kinase ERK2	Ext Val	-1	0.6239	0.3761	In
Cpd1865	CHEMBL3953371	Nc1n[nH]c2cc(NC(=O)NCc3ccc(F)c(Cl)c3)ncc12	IC50	=	940	-1	MAP kinase ERK2	Ext Val	1	0.0208	0.9792	In
Cpd1871	CHEMBL3654810	CN1C[C@H](NC(=O)Nc2cc3[nH]nc(c4ccnc(C)c4)c3cn2)[C@H](C1)c5ccccc5	IC50	=	18.76	1	MAP kinase ERK2	Ext Val	1	0.0116	0.9884	In
Cpd1872	CHEMBL1288067	COc1ccc(CC(=O)Nc2ccsc2c3cn(C)cn3)cc1	IC50	>	50000	-1	MAP kinase ERK2	Ext Val	-1	0.9893	0.0107	In
Cpd1873	CHEMBL1288100	O=C(Cc1cccc2cnccc12)Nc3ccsc3c4cscn4	IC50	>	50000	-1	MAP kinase ERK2	Ext Val	-1	0.7919	0.2081	In
Cpd1874	CHEMBL1288159	O=C(Cc1cccc2cnccc12)Nc3scnc3c4cnccn4	IC50	>	50000	-1	MAP kinase ERK2	Ext Val	-1	0.5442	0.4558	In
Cpd1877	CHEMBL372657	Clc1cccc(Nc2cncc(n2)c3cncc(NCCCn4cncn4)c3)c1	IC50	>	10000	-1	MAP kinase ERK2	Ext Val	1	0.2656	0.7344	In
Cpd1879	CHEMBL199395	Nc1nn(CC=C)c2nnc(cc12)c3c(nn4ccccc34)c5ccccc5	IC50	=	560	-1	MAP kinase ERK2	Ext Val	-1	0.8509	0.1491	In
Cpd1897	CHEMBL3662997	COC[C@@H](NC(=O)Nc1ncc2c(n[nH]c2c1F)c3ccnc(C)c3)c4ccccc4	IC50	=	0.2688	1	MAP kinase ERK2	Ext Val	1	0.0288	0.9712	In
Cpd1901	CHEMBL3662983	CC(NC(=O)Nc1cc2[nH]nc(c3ccnc(C)c3)c2cn1)C4CCOC4	IC50	=	12.67	1	MAP kinase ERK2	Ext Val	1	0.1271	0.8729	In
Cpd1906	CHEMBL3899711	N#CC(c1ccnc(OCc2ccccc2)n1)c3nc4ccccc4s3	IC50	>	30000	-1	MAP kinase ERK2	Ext Val	-1	0.5041	0.4959	In
Cpd1907	CHEMBL3628373	Clc1ccc(cn1)c2c[nH]c3ncc(nc23)c4ccncc4	IC50	=	182	1	MAP kinase ERK2	Ext Val	-1	0.7488	0.2512	In
Cpd1910	CHEMBL2064628	CN(C)C[C@@H](OC(=O)N1Cc2c(NC(=O)C(C)(C)C)n[nH]c2C1(C)C)c3ccccc3	IC50	=	170	1	MAP kinase ERK2	Ext Val	1	0.2199	0.7801	In
Cpd1912	CHEMBL520882	Oc1ccc(\C=C\2/SC(=S)N(Cc3ccccc3)C2=O)cc1	IC50	=	5500	-1	MAP kinase ERK2	Ext Val	-1	0.9845	0.0155	In
Cpd1913	CHEMBL3663022	CN1C[C@H](NC(=O)Nc2cc3[nH]nc(c4ccnc(C)c4)c3cn2)[C@H]([C@@H]1C(F)F)c5ccccc5	IC50	=	0.4414	1	MAP kinase ERK2	Ext Val	1	0.0043	0.9957	In
Cpd1915	CHEMBL1288099	O=C(Cc1cccc2ncccc12)Nc3ccsc3c4nnc[nH]4	IC50	>	50000	-1	MAP kinase ERK2	Ext Val	-1	0.6566	0.3434	In
Cpd1920	CHEMBL4109647	COc1ccc(cc1F)[C@H](NC(=O)c2ccc3cnc(N[C@H](C)C4CC4)nc3c2)[C@H]5CCCN5	IC50	=	2	1	MAP kinase ERK2	Ext Val	1	0.0619	0.9381	In
Cpd1921	CHEMBL3982835	COc1ccc(cc1F)[C@H](NC(=O)c2ccc3cnc(NC4CCOCC4)nc3c2)[C@H]5C[C@H](F)CN5	IC50	=	1.7	1	MAP kinase ERK2	Ext Val	1	0.0539	0.9461	In
Cpd1922	CHEMBL4108136	CCNc1n[nH]c2c(C)c(NC(=O)N[C@H](C)c3ccccc3)ncc12	IC50	=	38.82	1	MAP kinase ERK2	Ext Val	1	0.0551	0.9449	In
Cpd1935	CHEMBL1491	CCOC(=O)C1=C(COCCN)NC(=C(C1c2ccccc2Cl)C(=O)OC)C	IC50	=	Not Active	-1	MAP kinase ERK2	Ext Val	-1	0.9947	0.0053	In
Cpd1941	CHEMBL3658770	CCN(CC)CCC(NC(=O)Nc1cc2[nH]nc(c3ccnc(C)c3)c2cn1)c4ccccc4	IC50	=	1.065	1	MAP kinase ERK2	Ext Val	1	0.0092	0.9908	In
Cpd1946	CHEMBL4113436	Nc1ncc(cc1c2ncc(cn2)C(=O)N[C@H](CO)c3ccccc3)C4CCOCC4	IC50	=	49	1	MAP kinase ERK2	Ext Val	1	0.0566	0.9434	In
Cpd1951	CHEMBL1822138	Brc1csc(NC(=O)CN2C(=O)CCc3ncccc23)c1c4ncn[nH]4	IC50	>	500	-1	MAP kinase ERK2	Ext Val	-1	0.9802	0.0198	In
Cpd1955	CHEMBL1922216	CC[C@H](Nc1nc(NCc2ccccc2)c3ncn(C(C)C)c3n1)C(O)C(C)(C)C	IC50	>	200000	-1	MAP kinase ERK2	Ext Val	-1	0.841	0.159	In
Cpd1960	CHEMBL1922214	CCC(O)[C@H](CC)Nc1nc(NCc2ccccc2)c3ncn(C(C)C)c3n1	IC50	=	22000	-1	MAP kinase ERK2	Ext Val	-1	0.7629	0.2371	In
Cpd1961	CHEMBL1909070	CC(C)(Oc1ccc(cc1)C2CCCc3ccccc23)C(=O)O	IC50	=	815.1	-1	MAP kinase ERK2	Ext Val	-1	0.8153	0.1847	In
Cpd1963	CHEMBL934	CC(C)(C(=O)c1cccnc1)c2cccnc2	IC50	=	Not Active	-1	MAP kinase ERK2	Ext Val	-1	0.5767	0.4233	In
Cpd1969	CHEMBL3590121	FC(F)(F)c1cnc(NC2CCOCC2)nc1Nc3ccccc3NC(=O)C=C	IC50	=	8.5	1	MAP kinase ERK2	Ext Val	-1	0.5533	0.4467	In
Cpd1972	CHEMBL188502	Clc1cccc(Nc2cncc(n2)c3cncc(NCCCc4cccnc4)c3)c1	IC50	>	10000	-1	MAP kinase ERK2	Ext Val	1	0.1717	0.8283	In
Cpd1973	CHEMBL356164	NC(=O)c1cc(Br)c(Br)[nH]1	IC50	>	2500	-1	MAP kinase ERK2	Ext Val	-1	0.9983	0.0017	In
Cpd1974	CHEMBL445178	NC(=O)c1cc2c(cnc(N)c2s1)c3cccc(c3)c4ccccc4	IC50	=	4300	-1	MAP kinase ERK2	Ext Val	1	0.4552	0.5448	In
Cpd1979	CHEMBL1738710	Cc1ccc(cc1N2C=NC(=C(Cl)C2=O)OCc3ccc(F)cc3F)C(=O)NCCO	IC50	>	10000	-1	MAP kinase ERK2	Ext Val	-1	0.9833	0.0167	In
Cpd1980	CHEMBL3914678	CC(C)(O)[C@@H](NC(=O)Nc1cc2[nH]nc(N3CC4CC3CO4)c2cn1)c5ccccc5	IC50	=	1.5	1	MAP kinase ERK2	Ext Val	1	0.0409	0.9591	In
Cpd1981	CHEMBL4115524	C[C@@H](NC(=O)Nc1cc2[nH]nc(N3CC4CCC(C3)O4)c2cn1)c5ccccc5	IC50	=	3.4	1	MAP kinase ERK2	Ext Val	1	0.0416	0.9584	In
Cpd1982	CHEMBL4110593	C[C@@H](NC(=O)Nc1cc2[nH]nc(NC(=O)N3C[C@H]4COC[C@H]4C3)c2cn1)c5ccc(F)cc5	IC50	=	14.3	1	MAP kinase ERK2	Ext Val	1	0.0946	0.9054	In
Cpd1983	CHEMBL4108336	COc1n[nH]c2cc(NC(=O)N[C@H](c3ccc(F)c(C)c3)C(C)(C)O)nc(CO)c12	IC50	=	148.8	1	MAP kinase ERK2	Ext Val	1	0.0714	0.9286	In
Cpd1990	CHEMBL426123	O=C1CC[C@H](N2C(=O)c3ccccc3C2=O)C(=O)N1	IC50	=	Not Active	-1	MAP kinase ERK2	Ext Val	-1	0.9926	0.0074	In
Cpd1994	CHEMBL40583	Cc1ccc2cc3c(ccc4ccccc34)c5CCc1c25	IC50	=	Not Active	-1	MAP kinase ERK2	Ext Val	-1	0.9477	0.0523	In
Cpd1999	CHEMBL1916359	[O-][n+]1ccc2c(ccnc2c1c3c(Cl)cccc3Cl)c4ccc(F)cc4Cl	IC50	>	10000	-1	MAP kinase ERK2	Ext Val	-1	0.9517	0.0483	In
Cpd2001	CHEMBL1540	Nc1nc(O)c2ncn(CCC(CO)CO)c2n1	IC50	=	Not Active	-1	MAP kinase ERK2	Ext Val	-1	0.9522	0.0478	In
Cpd2005	CHEMBL1922208	CC[C@H](Nc1nc(NCc2cccnc2)c3ncn(C(C)C)c3n1)C(C)O	IC50	=	20000	-1	MAP kinase ERK2	Ext Val	-1	0.8235	0.1765	In
Cpd2007	CHEMBL1922116	CC[C@@H](Nc1nc(NCc2ccccn2)c3ncn(C(C)C)c3n1)C(O)C(C)C	IC50	>	200000	-1	MAP kinase ERK2	Ext Val	-1	0.8388	0.1612	In
Cpd2009	CHEMBL3604856	O=C1NC=CC(=C1)N2CCc3[nH]nc(c3C2)c4ccncc4	IC50	=	5	1	MAP kinase ERK2	Ext Val	-1	0.71	0.29	In
Cpd2010	CHEMBL3604855	Brc1ccccc1CN2C=CC(=CC2=O)N3CCc4[nH]nc(c4C3)c5ccncc5	IC50	=	4.6	1	MAP kinase ERK2	Ext Val	1	0.0997	0.9003	In
Cpd2017	CHEMBL413965	OC(=O)Cc1ccc(cc1)c2ccccc2	IC50	=	Not Active	-1	MAP kinase ERK2	Ext Val	-1	0.7655	0.2345	In
Cpd2019	CHEMBL3350037	C[C@@H](O)[C@H](CO)NC(=O)[C@@H]1CSSC[C@H](NC(=O)[C@H](N)Cc2ccccc2)C(=O)N[C@@H](Cc3ccccc3)C(=O)N[C@H](Cc4c[nH]c5ccccc45)C(=O)N[C@@H](CCCCN)C(=O)N[C@@H]([C@@H](C)O)C(=O)N1	IC50	=	Not Active	-1	MAP kinase ERK2	Ext Val	1	0	1	Outlier
Cpd2020	CHEMBL508112	S(Sc1nc2ccccc2s1)c3nc4ccccc4s3	IC50	=	Not Active	-1	MAP kinase ERK2	Ext Val	1	0.1003	0.8997	Outlier
Cpd2021	CHEMBL189	CC1=C(C=C(C#N)C(=O)N1)c2ccncc2	IC50	=	Not Active	-1	MAP kinase ERK2	Ext Val	-1	0.9452	0.0548	In
Cpd2025	CHEMBL1822151	Brc1csc(NC(=O)CN2C(=O)C=Cc3cc(ccc23)C#N)c1c4ncn[nH]4	IC50	>	50000	-1	MAP kinase ERK2	Ext Val	-1	0.9226	0.0774	In
Cpd2028	CHEMBL1515	CN1C=CNC1=S	IC50	=	Not Active	-1	MAP kinase ERK2	Ext Val	-1	0.9998	0.0002	In
Cpd2031	CHEMBL866	COc1c(C)c2COC(=O)c2c(O)c1C\C=C(/C)\CCC(=O)O	IC50	=	Not Active	-1	MAP kinase ERK2	Ext Val	-1	0.9846	0.0154	In
Cpd2034	CHEMBL828	N1c2ccccc2Sc3ccccc13	IC50	=	Not Active	-1	MAP kinase ERK2	Ext Val	-1	0.9964	0.0036	In
Cpd2036	CHEMBL1909048	Clc1ccccc1C(=O)N2CCC(Cc3ccccc3)CC2	IC50	=	Not Active	-1	MAP kinase ERK2	Ext Val	-1	0.8454	0.1546	In
Cpd2041	CHEMBL541	OC(=O)c1ccccc1	IC50	=	Not Active	-1	MAP kinase ERK2	Ext Val	-1	0.9476	0.0524	In
Cpd2043	CHEMBL1744448	[Br-].CC(O)[C@H](NC(=O)[C@@H](C)[C@@H](O)[C@@H](C)NC(=O)[C@@H](NC(=O)c1cc(N)nc(n1)C(CC(=O)N)NCC(N)C(=O)N)C(O[C@@H]2O[C@@H](CO)[C@@H](O)[C@H](O)[C@@H]2O[C@H]3O[C@H](CO)[C@@H](O)[C@H](OC(=O)N)[C@@H]3O)c4c[nH]cn4)C(=O)NCCc5nc(cs5)c6nc(cs6)C(=O)NCCC[S+](C)C	IC50	=	Not Active	-1	MAP kinase ERK2	Ext Val	1	0.2398	0.7602	Outlier
Cpd2047	CHEMBL898	OC(=O)c1cc(ccc1O)c2ccc(F)cc2F	IC50	=	Not Active	-1	MAP kinase ERK2	Ext Val	-1	0.7542	0.2458	In
Cpd2051	CHEMBL1201346	OC(=O)CCNC(=O)c1ccc(cc1)\N=N\c2ccc(O)c(c2)C(=O)O	IC50	=	Not Active	-1	MAP kinase ERK2	Ext Val	1	0.1176	0.8824	In
Cpd2059	CHEMBL1370561	CN1C(=O)N(C)c2nc[nH]c2C1=O.CN3C(=O)N(C)c4nc[nH]c4C3=O.NCCN	IC50	=	Not Active	-1	MAP kinase ERK2	Ext Val	-1	0.9988	0.0012	In
Cpd2061	CHEMBL3671127	O=C(NCCCCc1ccccc1)Nc2ccc3ncc(nc3n2)c4ccc(OCCN5CCOCC5)cc4	IC50	=	41	1	MAP kinase ERK2	Ext Val	1	0.004	0.996	In
Cpd2062	CHEMBL1991853	Clc1nccc(n1)C(C#N)c2nc3ccccc3s2	IC50	>	30000	-1	MAP kinase ERK2	Ext Val	-1	0.9106	0.0894	In
Cpd2067	CHEMBL467079	NC(=O)C(NC1=C(Nc2ccncc2)C(=O)C1=O)c3ccccc3	IC50	=	6300	-1	MAP kinase ERK2	Ext Val	-1	0.5152	0.4848	In
Cpd2069	CHEMBL4114513	CNCc1nc(NC(=O)N[C@H](C)c2ccccc2)cc3[nH]nc(OC)c13	IC50	=	970	-1	MAP kinase ERK2	Ext Val	1	0.1777	0.8223	In
Cpd2071	CHEMBL4114092	COC[C@@H](NC(=O)Nc1cc2[nH]nc(Nc3ccccc3F)c2cn1)c4ccccc4	IC50	=	9.4	1	MAP kinase ERK2	Ext Val	1	0.0112	0.9888	In
Cpd2072	CHEMBL3966395	COC(=O)Nc1n[nH]c2cc(NC(=O)N[C@@H](c3ccccc3)C(C)(C)O)ncc12	IC50	=	0.4	1	MAP kinase ERK2	Ext Val	1	0.0382	0.9618	In
Cpd2073	CHEMBL4109419	C[C@@H](NC(=O)Nc1cc2[nH]nc(NC(=O)OCCO)c2cn1)c3ccc(F)cc3	IC50	=	5.3	1	MAP kinase ERK2	Ext Val	1	0.0161	0.9839	In
Cpd2079	CHEMBL45245	O=C1Nc2ccccc2c3ccccc13	IC50	=	Not Active	-1	MAP kinase ERK2	Ext Val	-1	0.9326	0.0674	In
Cpd2080	CHEMBL411	CC\C(=C(\CC)/c1ccc(O)cc1)\c2ccc(O)cc2	IC50	=	Not Active	-1	MAP kinase ERK2	Ext Val	-1	0.9803	0.0197	In
Cpd2085	CHEMBL1068	NC(=O)N1c2ccccc2CC(=O)c3ccccc13	IC50	=	Not Active	-1	MAP kinase ERK2	Ext Val	-1	0.7856	0.2144	In
Cpd2086	CHEMBL83668	CN(C(=S)Oc1ccc2ccccc2c1)c3cccc(C)c3	IC50	=	Not Active	-1	MAP kinase ERK2	Ext Val	-1	0.7984	0.2016	In
Cpd2094	CHEMBL3654861	C[C@H](NC(=O)Nc1cc2[nH]nc(c3ccnc(C)c3)c2cn1)c4ccncc4	IC50	=	21.87	1	MAP kinase ERK2	Ext Val	1	0.017	0.983	In
Cpd2095	CHEMBL3654869	C[C@@H](NC(=O)Nc1cc2[nH]nc(c3conc3C)c2cn1)c4ccc(F)cc4	IC50	=	86.79	1	MAP kinase ERK2	Ext Val	1	0.0248	0.9752	In
Cpd2097	CHEMBL4111099	C[C@@H](NC(=O)Nc1cc2[nH]nc(OC3CCOC3)c2cn1)c4ccccc4	IC50	=	6.4	1	MAP kinase ERK2	Ext Val	1	0.0326	0.9674	In
Cpd2098	CHEMBL4111796	COc1n[nH]c2cc(NC(=O)N[C@H](C)c3ccc(F)c(Cl)c3)nc([C@H](C)O)c12	IC50	=	18.5	1	MAP kinase ERK2	Ext Val	1	0.0875	0.9125	In
Cpd2103	CHEMBL4106518	COc1n[nH]c2cc(NC(=O)N[C@H](C)c3ccccc3)nc(C#N)c12	IC50	=	63.2	1	MAP kinase ERK2	Ext Val	1	0.2331	0.7669	In
Cpd2104	CHEMBL4114822	COc1n[nH]c2cc(NC(=O)N[C@H](C)c3ccccc3)nc(C(=O)C)c12	IC50	=	16.3	1	MAP kinase ERK2	Ext Val	1	0.1177	0.8823	In
Cpd2105	CHEMBL4108802	CCOc1n[nH]c2c(F)c(NC(=O)N[C@H](COC)c3ccc(F)cc3)ncc12	IC50	=	3.9	1	MAP kinase ERK2	Ext Val	1	0.1029	0.8971	In
Cpd2106	CHEMBL4113449	COc1n[nH]c2cc(NC(=O)N[C@@H]([C@@H](O)C(C)C)c3ccccc3)nc(CO)c12	IC50	=	41.9	1	MAP kinase ERK2	Ext Val	1	0.0762	0.9238	In
Cpd2107	CHEMBL4114357	CCOc1n[nH]c2cc(NC(=O)N[C@@H]([C@H](O)COC)c3ccccc3)ncc12	IC50	=	821.2	-1	MAP kinase ERK2	Ext Val	1	0.0711	0.9289	In
Cpd2108	CHEMBL4108895	FC(F)COc1n[nH]c2cc(NC(=O)N[C@H]3CN(CC4CC4)C[C@@H]3c5ccccc5)ncc12	IC50	=	19	1	MAP kinase ERK2	Ext Val	1	0.0146	0.9854	In
Cpd2109	CHEMBL4114073	COc1n[nH]c2cc(NC(=O)N[C@H](C)c3ccc(Cl)c(C)c3)nc([C@H](C)O)c12	IC50	=	10.4	1	MAP kinase ERK2	Ext Val	1	0.0657	0.9343	In
Cpd2110	CHEMBL4110068	CCOc1n[nH]c2c(F)c(NC(=O)N[C@H](C)c3ccc(F)cc3)ncc12	IC50	=	9	1	MAP kinase ERK2	Ext Val	1	0.0839	0.9161	In
Cpd2111	CHEMBL3910096	CCOc1n[nH]c2cc(NC(=O)NC(CN3CCOCC3)c4ccccc4)ncc12	IC50	=	1.2	1	MAP kinase ERK2	Ext Val	1	0.0309	0.9691	In
Cpd2112	CHEMBL3957223	COc1n[nH]c2cc(NC(=O)NC3COc4ccccc4C3)ncc12	IC50	=	199.1	1	MAP kinase ERK2	Ext Val	1	0.0455	0.9545	In
Cpd2113	CHEMBL4107894	COc1n[nH]c2cc(NC(=O)N[C@H]([C@H]3CCCO3)c4ccccc4)ncc12	IC50	=	3.4	1	MAP kinase ERK2	Ext Val	1	0.0389	0.9611	In
Cpd2114	CHEMBL4110018	C[C@@H](NC(=O)Nc1cc2[nH]nc(OC3COC3)c2cn1)c4ccccc4	IC50	=	8.66	1	MAP kinase ERK2	Ext Val	1	0.0317	0.9683	In
Cpd2115	CHEMBL4114143	OCCOc1n[nH]c2cc(NC(=O)N[C@H](CO)c3ccccc3)ncc12	IC50	=	0.5	1	MAP kinase ERK2	Ext Val	1	0.0424	0.9576	In
Cpd2116	CHEMBL4107858	COCCOc1n[nH]c2cc(NC(=O)N[C@H]([C@@H](C)O)c3ccc(F)cc3)ncc12	IC50	=	0.8	1	MAP kinase ERK2	Ext Val	1	0.0462	0.9538	In
Cpd2122	CHEMBL4110223	OC[C@@H](NC(=O)Nc1cc2[nH]nc(OCCOC(F)(F)F)c2cn1)c3ccccc3	IC50	=	1	1	MAP kinase ERK2	Ext Val	1	0.4069	0.5931	In
Cpd2123	CHEMBL3930671	C[C@H](O)[C@@H](NC(=O)Nc1cc2[nH]nc(OCCOC(F)F)c2cn1)c3ccc(F)cc3	IC50	=	0.4	1	MAP kinase ERK2	Ext Val	1	0.0318	0.9682	In
Cpd2124	CHEMBL3911224	COCCOc1n[nH]c2cc(NC(=O)N[C@@H](c3ccc(Cl)cc3)C(C)(C)O)ncc12	IC50	=	1.1	1	MAP kinase ERK2	Ext Val	1	0.0846	0.9154	In
Cpd2126	CHEMBL4111452	CCOCc1nc(NC(=O)N[C@H](C)c2ccccc2)cc3[nH]nc(OC)c13	IC50	=	22.2	1	MAP kinase ERK2	Ext Val	1	0.1331	0.8669	In
Cpd2127	CHEMBL4112825	Nc1ncc(nc1c2ccc(C(=O)NC[C@@H](O)c3ccccc3)c(F)c2)C4CCOCC4	IC50	=	34.6	1	MAP kinase ERK2	Ext Val	1	0.0524	0.9476	In
Cpd2129	CHEMBL3658833	CCn1cc(CNC(=O)Nc2cc3[nH]nc(c4ccnc(C)c4)c3cn2)cn1	IC50	=	10.2	1	MAP kinase ERK2	Ext Val	1	0.0988	0.9012	In
Cpd2131	CHEMBL4108715	C[C@@H](NC(=O)Nc1cc2[nH]nc(OC[C@@H]3CCC(=O)N3)c2cn1)c4ccccc4	IC50	=	17.3	1	MAP kinase ERK2	Ext Val	1	0.0524	0.9476	In
Cpd2132	CHEMBL4111711	COc1ccccc1Nc2nc(NC(=O)N[C@H](C)c3ccccc3)cc4[nH]nc(OC)c24	IC50	=	50.4	1	MAP kinase ERK2	Ext Val	1	0.0409	0.9591	In
Cpd2133	CHEMBL3930520	CC(C)(O)[C@@H](NC(=O)Nc1cc2[nH]nc(OCCCC(F)(F)F)c2cn1)c3ccccc3	IC50	=	5.9	1	MAP kinase ERK2	Ext Val	1	0.0997	0.9003	In
Cpd2134	CHEMBL4113864	COc1n[nH]c2cc(NC(=O)N[C@H](CO)c3ccccc3)nc(C)c12	IC50	=	2.77	1	MAP kinase ERK2	Ext Val	1	0.07	0.93	In
Cpd2135	CHEMBL4115172	COC[C@@H](NC(=O)Nc1cc2[nH]nc(OC)c2c(n1)C(C)C)c3ccccc3	IC50	=	65.75	1	MAP kinase ERK2	Ext Val	1	0.2196	0.7804	In
Cpd2136	CHEMBL4113241	CCc1nc(NC(=O)N[C@H](COC)c2ccccc2)cc3[nH]nc(OC)c13	IC50	=	8.88	1	MAP kinase ERK2	Ext Val	1	0.1243	0.8757	In
Cpd2137	CHEMBL4110521	CNC(=O)OCc1nc(NC(=O)N[C@H](C)c2ccccc2)cc3[nH]nc(OC)c13	IC50	=	8.9	1	MAP kinase ERK2	Ext Val	1	0.1077	0.8923	In
Cpd2138	CHEMBL4114532	OC[C@@H](NC(=O)Nc1cc2[nH]nc(OCCOC(F)F)c2cn1)c3ccccc3	IC50	=	0.6	1	MAP kinase ERK2	Ext Val	1	0.0393	0.9607	In
Cpd2139	CHEMBL4114874	COc1n[nH]c2cc(NC(=O)N[C@H](C)c3ccc(Cl)cc3)ncc12	IC50	=	160.4	1	MAP kinase ERK2	Ext Val	1	0.0289	0.9711	In
Cpd2141	CHEMBL3925022	Nc1ncc(nc1c2ccc(cc2)C(=O)N[C@H](CO)c3ccccc3)[C@@H]4CCOC4	IC50	=	4.51	1	MAP kinase ERK2	Ext Val	1	0.0674	0.9326	In
Cpd2144	CHEMBL574646	O=C1\C(=C\c2ccccn2)\CNC/C/1=C\c3ccccn3	IC50	=	4000	-1	MAP kinase ERK2	Ext Val	1	0.4313	0.5687	In
Cpd2145	CHEMBL4109467	COc1n[nH]c2cc(NC(=O)N[C@H](C)c3ccccc3)nc(C(=O)N4CCOCC4)c12	IC50	=	1507	-1	MAP kinase ERK2	Ext Val	1	0.2704	0.7296	In
Cpd2155	CHEMBL3654845	CC[C@@H](NC(=O)Nc1cc2[nH]nc(c3ccnc(C)c3)c2cn1)c4ccccn4	IC50	=	0.4872	1	MAP kinase ERK2	Ext Val	1	0.0203	0.9797	In
Cpd2156	CHEMBL486540	O=C(Nc1nc(NC(=O)c2ccccc2)nn1c3ccccc3)\C=C\c4ccccc4	IC50	=	25600	-1	MAP kinase ERK2	Ext Val	1	0.4773	0.5227	In
Cpd2157	CHEMBL3923316	CCNc1n[nH]c2cc(NC(=O)NC(C)c3ccc(F)cn3)ncc12	IC50	=	33	1	MAP kinase ERK2	Ext Val	1	0.0965	0.9035	In
Cpd2158	CHEMBL4109644	COCCOc1n[nH]c2c(F)c(NC(=O)N[C@H](C)c3ccccc3)ncc12	IC50	=	6.56	1	MAP kinase ERK2	Ext Val	1	0.1035	0.8965	In
Cpd2163	CHEMBL3398598	Oc1ccc(NC(=O)[C@@H]2CCN(CC(=O)N3CCN(CC3)c4ccc(cc4)c5ncccn5)C2)cc1Cl	IC50	=	20	1	MAP kinase ERK2	Ext Val	1	0.0828	0.9172	In
Cpd2169	CHEMBL1288038	COc1ccc(CC(=O)Nc2ccsc2c3n[nH]c(n3)C(F)(F)F)cc1	IC50	>	50000	-1	MAP kinase ERK2	Ext Val	-1	0.8973	0.1027	In
Cpd2170	CHEMBL1288127	COC(=O)c1ncsc1NC(=O)Cc2cccc3cnccc23	IC50	>	50000	-1	MAP kinase ERK2	Ext Val	-1	0.8941	0.1059	In
Cpd2171	CHEMBL4111559	CO[C@@H]1CCC[C@H]1NC(=O)Nc2cc3[nH]nc(N)c3cn2	IC50	=	483	1	MAP kinase ERK2	Ext Val	1	0.1945	0.8055	In
Cpd2172	CHEMBL4111461	COC[C@@H](NC(=O)Nc1cc2[nH]nc(NC(C)C(F)(F)F)c2cn1)c3ccccc3	IC50	=	0.8	1	MAP kinase ERK2	Ext Val	1	0.0209	0.9791	In
Cpd2173	CHEMBL4113059	COC[C@@H](NC(=O)Nc1cc2[nH]nc(NC3CC3)c2cn1)c4ccccc4	IC50	=	1	1	MAP kinase ERK2	Ext Val	1	0.0371	0.9629	In
Cpd2174	CHEMBL4109615	COC[C@@H](NC(=O)Nc1cc2[nH]nc(OCCO)c2c(C)n1)c3ccccc3	IC50	=	0.92	1	MAP kinase ERK2	Ext Val	1	0.073	0.927	In
Cpd2177	CHEMBL3941714	COCCNC(=O)Nc1cc2[nH]nc(N3CC(C3)OC)c2cn1	IC50	=	341.6	1	MAP kinase ERK2	Ext Val	1	0.4213	0.5787	In
Cpd2178	CHEMBL3986313	C[C@@H](NC(=O)Nc1cc2[nH]nc(N3CC[C@@H]3C)c2cn1)c4ccccc4	IC50	=	14.9	1	MAP kinase ERK2	Ext Val	1	0.0631	0.9369	In
Cpd2179	CHEMBL4107712	C[C@@H](NC(=O)Nc1cc2[nH]nc(N3CC(C3)C#N)c2cn1)c4ccccc4	IC50	=	9.9	1	MAP kinase ERK2	Ext Val	1	0.2957	0.7043	In
Cpd2180	CHEMBL4110102	COC1(C)CN(C1)c2n[nH]c3cc(NC(=O)N[C@H](C)c4ccccc4)ncc23	IC50	=	14	1	MAP kinase ERK2	Ext Val	1	0.0719	0.9281	In
Cpd2181	CHEMBL4115633	CCNc1n[nH]c2cc(NC(=O)N[C@H](COC)c3ccccc3)ncc12	IC50	=	0.8	1	MAP kinase ERK2	Ext Val	1	0.063	0.937	In
Cpd2182	CHEMBL3928134	COC[C@H](C)NC(=O)Nc1cc2[nH]nc(N3CCOCC3)c2cn1	IC50	=	51.6	1	MAP kinase ERK2	Ext Val	1	0.4469	0.5531	In
Cpd2183	CHEMBL4113693	COC1CN(C1)c2n[nH]c3cc(NC(=O)N[C@H](C)c4ccccc4)ncc23	IC50	=	8.75	1	MAP kinase ERK2	Ext Val	1	0.0666	0.9334	In
Cpd2184	CHEMBL4110702	COC[C@@H](NC(=O)Nc1cc2[nH]nc(N3CCOCC3C)c2cn1)c4ccccc4	IC50	=	1.2	1	MAP kinase ERK2	Ext Val	1	0.0892	0.9108	In
Cpd2186	CHEMBL3896770	COCCOc1n[nH]c2cc(NC(=O)NCCc3ccccc3)ncc12	IC50	=	8.51	1	MAP kinase ERK2	Ext Val	1	0.0581	0.9419	In
Cpd2187	CHEMBL3896262	COCCOc1n[nH]c2cc(NC(=O)NCc3c(F)cccc3F)ncc12	IC50	=	20.6	1	MAP kinase ERK2	Ext Val	1	0.0774	0.9226	In
Cpd2188	CHEMBL3970924	COCCOc1n[nH]c2cc(NC(=O)NCCc3ccccn3)ncc12	IC50	=	38.47	1	MAP kinase ERK2	Ext Val	1	0.0967	0.9033	In
Cpd2189	CHEMBL3972007	COCCOc1n[nH]c2cc(NC(=O)N[C@@H]3C[C@H]3c4ccccc4)ncc12	IC50	=	17.91	1	MAP kinase ERK2	Ext Val	1	0.0396	0.9604	In
Cpd2232	CHEMBL26260	O=C1C=C(Oc2ccc3ccccc3c12)c4ccccc4	IC50	=	Not Active	-1	MAP kinase ERK2	Ext Val	-1	0.7994	0.2006	In
Cpd2240	CHEMBL3780151	Fc1ccc(Nc2cncc3nc(cnc23)c4ccccc4)cc1Cl	IC50	>	100000	-1	MAP kinase ERK2	Ext Val	-1	0.5998	0.4002	In
Cpd2251	CHEMBL1288160	O=C(Cc1cccc2cnccc12)Nc3scnc3c4cscn4	IC50	>	50000	-1	MAP kinase ERK2	Ext Val	-1	0.7719	0.2281	In
Cpd2252	CHEMBL1288128	O=C(Cc1cccc2cnccc12)Nc3scnc3c4nc[nH]n4	IC50	=	24000	-1	MAP kinase ERK2	Ext Val	-1	0.7792	0.2208	In
Cpd2256	CHEMBL1682013	Brc1csc(NC(=O)CN2C(=O)CCc3ccccc23)c1c4ncn[nH]4	IC50	>	50000	-1	MAP kinase ERK2	Ext Val	-1	0.9629	0.0371	In
Cpd2266	CHEMBL104	Clc1ccccc1C(c2ccccc2)(c3ccccc3)n4ccnc4	IC50	=	Not Active	-1	MAP kinase ERK2	Ext Val	-1	0.9908	0.0092	In
Cpd2278	CHEMBL3589657	Cc1ccc2[nH]c3c4ccccc4nc(C(=O)O)c3c2c1	IC50	>	10000	-1	MAP kinase ERK2	Ext Val	1	0.4929	0.5071	In
Cpd2279	CHEMBL3589660	OC(=O)c1nc2ccccc2c3[nH]c4c(Cl)cccc4c13	IC50	>	10000	-1	MAP kinase ERK2	Ext Val	-1	0.5354	0.4646	In
Cpd2281	CHEMBL1682015	O=C(CN1C(=O)CCc2ccccc12)Nc3scc(C#N)c3c4ncn[nH]4	IC50	>	50000	-1	MAP kinase ERK2	Ext Val	-1	0.7595	0.2405	In
Cpd2488	CHEMBL4106643	Nc1ncc(cc1c2ccc(cc2)C(=O)N[C@H](CO)c3ccccc3)C4CCOCC4	IC50	=	4.36	1	MAP kinase ERK2	Ext Val	1	0.0439	0.9561	In
Cpd2490	CHEMBL4108238	Nc1ncc(nc1c2ccc(C(=O)N[C@H](CO)c3cc(F)cc(Br)c3)c(F)c2)C4CCC(=O)CC4	IC50	=	0.036	1	MAP kinase ERK2	Ext Val	1	0.0272	0.9728	In
Cpd2502	CHEMBL311469	CC(=O)Nc1ccc2c(Cc3ccccc23)c1	IC50	=	Not Active	-1	MAP kinase ERK2	Ext Val	-1	0.8624	0.1376	In
Cpd2518	CHEMBL395110	CN1CCCC(CN2c3ccccc3Sc4ccccc24)C1	IC50	=	Not Active	-1	MAP kinase ERK2	Ext Val	-1	0.9951	0.0049	In
Cpd2532	CHEMBL19224	COc1ccc(Cc2nccc3cc(OC)c(OC)cc23)cc1OC	IC50	=	Not Active	-1	MAP kinase ERK2	Ext Val	-1	0.8316	0.1684	In
Cpd2544	CHEMBL219146	CC[C@]1(O)C[C@H]2CN(CCc3c([nH]c4ccccc34)[C@@](C2)(C(=O)OC)c5cc6c(cc5OC)N(C)[C@H]7[C@](O)([C@H](O)[C@]8(CC)C=CCN9CC[C@]67[C@H]89)C(=O)N)C1	IC50	=	Not Active	-1	MAP kinase ERK2	Ext Val	-1	0.9761	0.0239	Outlier
Cpd2549	CHEMBL3781989	C1CCN(CC1)c2ccc(Nc3cncc4ncc(nc34)c5ccccc5)cc2	IC50	=	2020	-1	MAP kinase ERK2	Ext Val	1	0.4345	0.5655	In
Cpd2550	CHEMBL3780971	COc1ccc(cc1)c2cnc3cncc(Nc4ccc(cc4)N5CCCCC5)c3n2	IC50	=	3130	-1	MAP kinase ERK2	Ext Val	1	0.4278	0.5722	In
Cpd2551	CHEMBL3781028	C1CCN(CC1)c2ccc(cc2)c3cnc4cncc(Nc5ccccc5)c4n3	IC50	=	12210	-1	MAP kinase ERK2	Ext Val	1	0.4307	0.5693	In
[truncated: 1,108 more rows]
