# Supplementary material for: Multi-Target Chemometric Modelling, Fragment Analysis and Virtual Screening with ERK Inhibitors as Potential Anticancer Agents
Source: Molecules. 2019 Oct 30;24(21):3909. doi: 10.3390/molecules24213909 (PMC6864583; doi:10.3390/molecules24213909)
Supplement: Supplementary file 1 [file molecules-24-03909-s001.zip › SM2.xlsx]

## Sheet: FP
Multi-target chemometric modelling, fragment analysis and virtual screening with ERK inhibitors as potential anticancer agents
Amit Kumar Halder, Amal Kanta Giri and Maria Natália Dias Soeiro Cordeiro
Department of Chemistry and Biochemistry, University of Porto, 4169-007 Porto, Portugal

## Sheet: Results_fragment contributions
Fragment	me	bt	Condition	Score	Average confidence score (ASC)
F01	IC50	MAP kinase ERK1	c1	-1.38676	1.53865
F01	IC50	MAP kinase ERK2	c2	-1.23017	1.81753
F01	Ki	MAP kinase ERK1	c3	-2.02034	0.410326
F01	Ki	MAP kinase ERK2	c4	-1.86374	0.689201
F02	IC50	MAP kinase ERK1	c1	-2.2221	0.0510063
F02	IC50	MAP kinase ERK2	c2	-2.06551	0.329881
F02	Ki	MAP kinase ERK1	c3	-2.85567	-1.07732
F02	Ki	MAP kinase ERK2	c4	-2.69908	-0.798447
F03	IC50	MAP kinase ERK1	c1	-1.71845	0.947951
F03	IC50	MAP kinase ERK2	c2	-1.56186	1.22683
F03	Ki	MAP kinase ERK1	c3	-2.35202	-0.180377
F03	Ki	MAP kinase ERK2	c4	-2.19543	0.0984978
F04	IC50	MAP kinase ERK1	c1	-2.64737	-0.706362
F04	IC50	MAP kinase ERK2	c2	-2.49078	-0.427487
F04	Ki	MAP kinase ERK1	c3	-3.28095	-1.83469
F04	Ki	MAP kinase ERK2	c4	-3.12435	-1.55581
F05	IC50	MAP kinase ERK1	c1	-1.65161	1.06699
F05	IC50	MAP kinase ERK2	c2	-1.49502	1.34587
F05	Ki	MAP kinase ERK1	c3	-2.28518	-0.0613368
F05	Ki	MAP kinase ERK2	c4	-2.12859	0.217538
F06	IC50	MAP kinase ERK1	c1	-2.18568	0.115857
F06	IC50	MAP kinase ERK2	c2	-2.02909	0.394732
F06	Ki	MAP kinase ERK1	c3	-2.81926	-1.01247
F06	Ki	MAP kinase ERK2	c4	-2.66267	-0.733596
F07	IC50	MAP kinase ERK1	c1	-1.5754	1.2027
F07	IC50	MAP kinase ERK2	c2	-1.41881	1.48158
F07	Ki	MAP kinase ERK1	c3	-2.20898	0.0743725
F07	Ki	MAP kinase ERK2	c4	-2.05239	0.353247
F08	IC50	MAP kinase ERK1	c1	-2.66134	-0.731227
F08	IC50	MAP kinase ERK2	c2	-2.50474	-0.452352
F08	Ki	MAP kinase ERK1	c3	-3.29491	-1.85955
F08	Ki	MAP kinase ERK2	c4	-3.13832	-1.58068
F09	IC50	MAP kinase ERK1	c1	-1.71929	0.946451
F09	IC50	MAP kinase ERK2	c2	-1.5627	1.22533
F09	Ki	MAP kinase ERK1	c3	-2.35287	-0.181877
F09	Ki	MAP kinase ERK2	c4	-2.19627	0.0969981
F10	IC50	MAP kinase ERK1	c1	-1.80533	0.793224
F10	IC50	MAP kinase ERK2	c2	-1.64874	1.0721
F10	Ki	MAP kinase ERK1	c3	-2.43891	-0.335103
F10	Ki	MAP kinase ERK2	c4	-2.28231	-0.0562284
F11	IC50	MAP kinase ERK1	c1	-1.04652	2.1446
F11	IC50	MAP kinase ERK2	c2	-0.889923	2.42347
F11	Ki	MAP kinase ERK1	c3	-1.68009	1.01627
F11	Ki	MAP kinase ERK2	c4	-1.5235	1.29514
F12	IC50	MAP kinase ERK1	c1	-1.80741	0.789523
F12	IC50	MAP kinase ERK2	c2	-1.65082	1.0684
F12	Ki	MAP kinase ERK1	c3	-2.44098	-0.338805
F12	Ki	MAP kinase ERK2	c4	-2.28439	-0.0599297
F13	IC50	MAP kinase ERK1	c1	-2.25414	-0.00604962
F13	IC50	MAP kinase ERK2	c2	-2.09754	0.272825
F13	Ki	MAP kinase ERK1	c3	-2.88771	-1.13438
F13	Ki	MAP kinase ERK2	c4	-2.73112	-0.855503
F14	IC50	MAP kinase ERK1	c1	-1.58539	1.18493
F14	IC50	MAP kinase ERK2	c2	-1.42879	1.4638
F14	Ki	MAP kinase ERK1	c3	-2.21896	0.0565977
F14	Ki	MAP kinase ERK2	c4	-2.06237	0.335473
F15	IC50	MAP kinase ERK1	c1	-0.880175	2.44083
F15	IC50	MAP kinase ERK2	c2	-0.723582	2.71971
F15	Ki	MAP kinase ERK1	c3	-1.51375	1.3125
F15	Ki	MAP kinase ERK2	c4	-1.35716	1.59138
F16	IC50	MAP kinase ERK1	c1	-2.09422	0.278745
F16	IC50	MAP kinase ERK2	c2	-1.93763	0.55762
F16	Ki	MAP kinase ERK1	c3	-2.72779	-0.849583
F16	Ki	MAP kinase ERK2	c4	-2.5712	-0.570708
F17	IC50	MAP kinase ERK1	c1	-1.80552	0.792891
F17	IC50	MAP kinase ERK2	c2	-1.64893	1.07177
F17	Ki	MAP kinase ERK1	c3	-2.43909	-0.335436
F17	Ki	MAP kinase ERK2	c4	-2.2825	-0.0565614
F18	IC50	MAP kinase ERK1	c1	-2.50081	-0.445357
F18	IC50	MAP kinase ERK2	c2	-2.34422	-0.166482
F18	Ki	MAP kinase ERK1	c3	-3.13439	-1.57368
F18	Ki	MAP kinase ERK2	c4	-2.9778	-1.29481
F19	IC50	MAP kinase ERK1	c1	-2.37738	-0.225531
F19	IC50	MAP kinase ERK2	c2	-2.22079	0.0533437
F19	Ki	MAP kinase ERK1	c3	-3.01095	-1.35386
F19	Ki	MAP kinase ERK2	c4	-2.85436	-1.07498
F20	IC50	MAP kinase ERK1	c1	-1.81464	0.776646
F20	IC50	MAP kinase ERK2	c2	-1.65805	1.05552
F20	Ki	MAP kinase ERK1	c3	-2.44821	-0.351682
F20	Ki	MAP kinase ERK2	c4	-2.29162	-0.0728066
F21	IC50	MAP kinase ERK1	c1	-1.267	1.75193
F21	IC50	MAP kinase ERK2	c2	-1.11041	2.03081
F21	Ki	MAP kinase ERK1	c3	-1.90058	0.623603
F21	Ki	MAP kinase ERK2	c4	-1.74398	0.902478
F22	IC50	MAP kinase ERK1	c1	-2.37519	-0.221638
F22	IC50	MAP kinase ERK2	c2	-2.2186	0.0572369
F22	Ki	MAP kinase ERK1	c3	-3.00877	-1.34997
F22	Ki	MAP kinase ERK2	c4	-2.85217	-1.07109
F23	IC50	MAP kinase ERK1	c1	-1.6175	1.12774
F23	IC50	MAP kinase ERK2	c2	-1.4609	1.40662
F23	Ki	MAP kinase ERK1	c3	-2.25107	-0.000585532
F23	Ki	MAP kinase ERK2	c4	-2.09448	0.278289
F24	IC50	MAP kinase ERK1	c1	-1.70954	0.96382
F24	IC50	MAP kinase ERK2	c2	-1.55295	1.24269
F24	Ki	MAP kinase ERK1	c3	-2.34311	-0.164508
F24	Ki	MAP kinase ERK2	c4	-2.18652	0.114367
F25	IC50	MAP kinase ERK1	c1	-2.8813	-1.12296
F25	IC50	MAP kinase ERK2	c2	-2.7247	-0.844081
F25	Ki	MAP kinase ERK1	c3	-3.51487	-2.25128
F25	Ki	MAP kinase ERK2	c4	-3.35828	-1.97241
F26	IC50	MAP kinase ERK1	c1	-1.99926	0.447867
F26	IC50	MAP kinase ERK2	c2	-1.84266	0.726742
F26	Ki	MAP kinase ERK1	c3	-2.63283	-0.680461
F26	Ki	MAP kinase ERK2	c4	-2.47624	-0.401586
F27	IC50	MAP kinase ERK1	c1	-2.18994	0.108287
F27	IC50	MAP kinase ERK2	c2	-2.03334	0.387162
F27	Ki	MAP kinase ERK1	c3	-2.82351	-1.02004
F27	Ki	MAP kinase ERK2	c4	-2.66692	-0.741166
F28	IC50	MAP kinase ERK1	c1	-2.19559	0.0982221
F28	IC50	MAP kinase ERK2	c2	-2.03899	0.377097
F28	Ki	MAP kinase ERK1	c3	-2.82916	-1.03011
F28	Ki	MAP kinase ERK2	c4	-2.67257	-0.751231
F29	IC50	MAP kinase ERK1	c1	-2.21026	0.072087
F29	IC50	MAP kinase ERK2	c2	-2.05367	0.350962
F29	Ki	MAP kinase ERK1	c3	-2.84384	-1.05624
F29	Ki	MAP kinase ERK2	c4	-2.68724	-0.777366
F30	IC50	MAP kinase ERK1	c1	-2.15071	0.178137
F30	IC50	MAP kinase ERK2	c2	-1.99412	0.457012
F30	Ki	MAP kinase ERK1	c3	-2.78429	-0.950191
F30	Ki	MAP kinase ERK2	c4	-2.62769	-0.671316
F31	IC50	MAP kinase ERK1	c1	-2.69877	-0.797898
F31	IC50	MAP kinase ERK2	c2	-2.54218	-0.519023
F31	Ki	MAP kinase ERK1	c3	-3.33235	-1.92623
F31	Ki	MAP kinase ERK2	c4	-3.17575	-1.64735
F32	IC50	MAP kinase ERK1	c1	-2.01181	0.425508
F32	IC50	MAP kinase ERK2	c2	-1.85522	0.704383
F32	Ki	MAP kinase ERK1	c3	-2.64538	-0.70282
F32	Ki	MAP kinase ERK2	c4	-2.48879	-0.423945
F33	IC50	MAP kinase ERK1	c1	-2.51069	-0.462938
F33	IC50	MAP kinase ERK2	c2	-2.35409	-0.184063
F33	Ki	MAP kinase ERK1	c3	-3.14426	-1.59127
F33	Ki	MAP kinase ERK2	c4	-2.98767	-1.31239
F34	IC50	MAP kinase ERK1	c1	-2.28282	-0.0571273
F34	IC50	MAP kinase ERK2	c2	-2.12623	0.221748
F34	Ki	MAP kinase ERK1	c3	-2.91639	-1.18546
F34	Ki	MAP kinase ERK2	c4	-2.7598	-0.90658
F35	IC50	MAP kinase ERK1	c1	-1.93351	0.564949
F35	IC50	MAP kinase ERK2	c2	-1.77692	0.843824
F35	Ki	MAP kinase ERK1	c3	-2.56709	-0.563379
F35	Ki	MAP kinase ERK2	c4	-2.41049	-0.284504
F36	IC50	MAP kinase ERK1	c1	-2.58853	-0.601559
F36	IC50	MAP kinase ERK2	c2	-2.43193	-0.322684
F36	Ki	MAP kinase ERK1	c3	-3.2221	-1.72989
F36	Ki	MAP kinase ERK2	c4	-3.06551	-1.45101
F37	IC50	MAP kinase ERK1	c1	-2.45463	-0.363099
F37	IC50	MAP kinase ERK2	c2	-2.29803	-0.0842237
F37	Ki	MAP kinase ERK1	c3	-3.0882	-1.49143
F37	Ki	MAP kinase ERK2	c4	-2.93161	-1.21255
F38	IC50	MAP kinase ERK1	c1	-2.412	-0.287179
F38	IC50	MAP kinase ERK2	c2	-2.2554	-0.00830395
F38	Ki	MAP kinase ERK1	c3	-3.04557	-1.41551
F38	Ki	MAP kinase ERK2	c4	-2.88898	-1.13663
F39	IC50	MAP kinase ERK1	c1	-2.41373	-0.290272
F39	IC50	MAP kinase ERK2	c2	-2.25714	-0.0113974
F39	Ki	MAP kinase ERK1	c3	-3.04731	-1.4186
F39	Ki	MAP kinase ERK2	c4	-2.89071	-1.13973
F40	IC50	MAP kinase ERK1	c1	-2.04396	0.368247
F40	IC50	MAP kinase ERK2	c2	-1.88737	0.647122
F40	Ki	MAP kinase ERK1	c3	-2.67754	-0.760081
F40	Ki	MAP kinase ERK2	c4	-2.52094	-0.481206
F41	IC50	MAP kinase ERK1	c1	-1.98156	0.479374
F41	IC50	MAP kinase ERK2	c2	-1.82497	0.758249
F41	Ki	MAP kinase ERK1	c3	-2.61514	-0.648954
F41	Ki	MAP kinase ERK2	c4	-2.45854	-0.370079
F42	IC50	MAP kinase ERK1	c1	-1.513	1.31384
F42	IC50	MAP kinase ERK2	c2	-1.3564	1.59272
F42	Ki	MAP kinase ERK1	c3	-2.14657	0.185517
F42	Ki	MAP kinase ERK2	c4	-1.98998	0.464392
F43	IC50	MAP kinase ERK1	c1	-2.67154	-0.749392
F43	IC50	MAP kinase ERK2	c2	-2.51494	-0.470517
F43	Ki	MAP kinase ERK1	c3	-3.30511	-1.87772
F43	Ki	MAP kinase ERK2	c4	-3.14852	-1.59885
F44	IC50	MAP kinase ERK1	c1	-1.79185	0.81724
F44	IC50	MAP kinase ERK2	c2	-1.63525	1.09611
F44	Ki	MAP kinase ERK1	c3	-2.42542	-0.311088
F44	Ki	MAP kinase ERK2	c4	-2.26883	-0.0322134
F45	IC50	MAP kinase ERK1	c1	-1.37167	1.56553
F45	IC50	MAP kinase ERK2	c2	-1.21508	1.84441
F45	Ki	MAP kinase ERK1	c3	-2.00524	0.437203
F45	Ki	MAP kinase ERK2	c4	-1.84865	0.716078
F46	IC50	MAP kinase ERK1	c1	-1.5476	1.25222
F46	IC50	MAP kinase ERK2	c2	-1.391	1.5311
F46	Ki	MAP kinase ERK1	c3	-2.18117	0.123895
F46	Ki	MAP kinase ERK2	c4	-2.02458	0.40277
