# Supplementary material for: Multi-Target Chemometric Modelling, Fragment Analysis and Virtual Screening with ERK Inhibitors as Potential Anticancer Agents
Source: Molecules. 2019 Oct 30;24(21):3909. doi: 10.3390/molecules24213909 (PMC6864583; doi:10.3390/molecules24213909)
Supplement: Supplementary file 1 [file molecules-24-03909-s001.zip › SM3.xlsx]

## Sheet: FP
Multi-target chemometric modelling, fragment analysis and virtual screening with ERK inhibitors as potential anticancer agents
Amit Kumar Halder, Amal Kanta Giri and Maria Natália Dias Soeiro Cordeiro
Department of Chemistry and Biochemistry, University of Porto, 4169-007 Porto, Portugal

## Sheet: VS database structures
Name *	SMILES
Asn0001	COC1=CC=C(C=C1)C1=C(N=CO1)C(=O)NCC1=CN=CC=C1
Asn0002	O=C(N1CCC2=NC(=NC(NC3=CC=CC=C3)=C2C1)N1CCCC1)C1=CC=NC=C1
Asn0003	CC(=O)N1CCC2=NC(=NC(NC3=CC=CC=C3)=C2C1)N1CCCC1
Asn0004	CC(=O)N1CCC2=NC(=NC(NC3=CC=CC(F)=C3)=C2C1)N1CCCC1
Asn0005	CCC(=O)N1CCC2=NC(=NC(NC3=CC=CC(F)=C3)=C2C1)N1CCCC1
Asn0006	FC1=CC(NC2=C3CN(CCC3=NC(=N2)N2CCCC2)C(=O)C2=CC=CC=N2)=CC=C1
Asn0007	FC1=CC(NC2=C3CN(CCC3=NC(=N2)N2CCCC2)C(=O)C2=CC=CN=C2)=CC=C1
Asn0008	FC1=CC(NC2=C3CN(CCC3=NC(=N2)N2CCCC2)C(=O)C2=CC=NC=C2)=CC=C1
Asn0009	FC1=CC(NC2=C3CN(CCC3=NC(=N2)N2CCCC2)C(=O)CN2CCOCC2)=CC=C1
Asn0010	FC1=CC(NC2=C3CN(CCC3=NC(=N2)N2CCCC2)C(=O)CC2=NC=CC=C2)=CC=C1
Asn0011	CC1=C(C=CC=N1)C(=O)N1CCC2=NC(=NC(NC3=CC=CC(F)=C3)=C2C1)N1CCCC1
Asn0012	FC1=CC(NC2=C3CN(CCC3=NC(=N2)N2CCCC2)C(=O)C2=CN=CC=N2)=CC=C1
Asn0013	FC1=CC(NC2=C3CN(CCC3=NC(=N2)N2CCCC2)C(=O)C2CCCO2)=CC=C1
Asn0014	FC1=CC(NC2=C3CNCCC3=NC(=N2)N2CCCC2)=CC=C1
Asn0015	C(N1CCC2=NC(=NC(NC3=CN=CC=C3)=C2C1)N1CCCC1)C1=CC=CC=C1
Asn0016	COC1=CC=CC(NC2=NC(=NC3=C2CNCC3)N2CCCC2)=C1
Asn0017	NC1CCC2=NC(=NC(NC3=CC(F)=CC=C3)=C2C1)C1=CC=NC=C1
Asn0018	NC1CCC2=NC(=NC(NC3=CC=C(C=C3)C(F)(F)F)=C2C1)C1=CC=NC=C1
Asn0019	NC1CCC2=NC(=NC(NC3=CC(=CC=C3)C(F)(F)F)=C2C1)C1=CC=NC=C1
Asn0020	NC1CCC2=NC(=NC(NC3=CC=C(Cl)C=C3)=C2C1)C1=CN=CC=C1
Asn0021	NC1CCC2=NC(=NC(NC3=CC=C(C=C3)C(F)(F)F)=C2C1)C1=CN=CC=C1
Asn0022	NC1CCC2=NC(=NC(NC3=CC(=CC=C3)C(F)(F)F)=C2C1)C1=CN=CC=C1
Asn0023	NC1CCC2=NC(=NC(NC3=CC=C(F)C=C3)=C2C1)C1=CN=CC=C1
Asn0024	O=C(N1C2CCC1C1=C(C2)N=C(N=C1NC1=CC=CC=C1)C1CC1)C1=CN=CC=C1
Asn0025	NCC(=O)N1C2CCC1C1=C(C2)N=C(N=C1NC1=CC=CC=C1)C1CC1
Asn0026	NCCC(=O)N1C2CCC1C1=C(C2)N=C(N=C1NC1=CC=CC=C1)C1CC1
Asn0027	CN(C)C1=NC2=C(C3CCC(C2)N3C(=O)CCN)C(NC2=CC=CC=C2)=N1
Asn0028	CN(C)C1=NC2=C(C3CCC(C2)N3C(=O)CN)C(NC2=CC=CC=C2)=N1
Asn0029	CN(C)C1=NC2=C(C3CCC(C2)N3C(=O)CC(C)(C)C)C(NC2=CC=CC=C2)=N1
Asn0030	CN(C)C1=NC2=C(C3CCC(C2)N3C(=O)C2CC2)C(NC2=CC=CC=C2)=N1
Asn0031	COCCC(=O)N1C2CCC1C1=C(C2)N=C(N=C1NC1=CC=CC=C1)N(C)C
Asn0032	COCC(=O)N1C2CCC1C1=C(C2)N=C(N=C1NC1=CC=CC=C1)N(C)C
Asn0033	CN(C)C1=NC2=C(C3CCC(C2)N3C(=O)C2=CC(=O)N(C)C=C2)C(NC2=CC=CC=C2)=N1
Asn0034	CN(C)C1=NC2=C(C3CCC(C2)N3C(=O)CN2C=CC=N2)C(NC2=CC=CC=C2)=N1
Asn0035	CN(C)C1=NC2=C(C3CCC(C2)N3C(=O)C2=NN(C)C=C2)C(NC2=CC=CC=C2)=N1
Asn0036	NCCNC1=NC(=CC2=NC=CC=C12)C1=CC=NC=C1
Asn0037	CC(C)C(=O)N1C2CCC1C1=C(C2)N=C(N=C1NC1=CC=CC=C1)N(C)C
Asn0038	CC(C)C(=O)N1C2CCC1C1=C(C2)N=C(N=C1NC1=CC=CC=C1)C1CC1
Asn0039	COC1=CC=C(NC2=NC(C)=NC3=C2CNCC3)C=C1
Asn0040	CC1=NC(NC2=C(C)C(C)=CC=C2)=C(C#N)C(C)=C1
Asn0041	BrC1=CC=C(NC(=O)COC2=CC(NC(=O)C3=CC=CN=C3)=CC=C2)C=C1
Asn0042	OC1=CC=C(C=C1)C1=NN=C(O1)SCC1CCCCC1
Asn0043	COC1=C(NC(=O)CSC2=NN=C(CN3N=NC(=N3)C3=CC=CC=C3)N2C2=CC=CC=C2)C=CC=C1
Asn0044	ClC1=CC=CC(NCC2=NN=C(O2)SCC2=CC=CC=C2)=C1
Asn0045	COC1=CC=CC=C1NC1=NC2=C(C=CC(C)=C2)C=C1C#N
Asn0046	COC1=CC=C(NC2=NC3=C(C=CC(C)=C3)C=C2C#N)C=C1
Asn0047	COC1=CC=C(NC2=NC3=C(C=CC(C)=C3)C=C2C#N)C(OC)=C1
Asn0048	CCOC1=CC=C(C=C1OCC)C1=NN=C(O1)C1=CC=CO1
Asn0049	CC1=CC(NC2=C(C)C=CC(=C2)[N+]([O-])=O)=NC(SCC2=CC=C(Cl)C=C2)=N1
Asn0050	CC1=CC(NC2=C(C=CC=C2)C(O)=O)=NC(SCC2=C(Cl)C=CC=C2)=N1
Asn0051	COC1=CC=CC=C1NC1=NC2=C(C=C(C)C=C2)C=C1C#N
Asn0052	COC1=CC(OC)=C(NC2=NC3=C(C=C(C)C=C3)C=C2C#N)C=C1
Asn0053	CN1CCN(CC1)C1=NC2=C(C=CC=C2C)C=C1C#N
Asn0054	COC1=CC=CC=C1NC1=NC2=C(C=CC=C2C)C=C1C#N
Asn0055	COC1=CC=C(NC2=NC3=C(C=CC=C3C)C=C2C#N)C=C1
Asn0056	COC1=CC=C(NC2=NC3=C(C=CC=C3C)C=C2C#N)C(OC)=C1
Asn0057	COC1=CC=C(Cl)C=C1NC1=NC2=C(C=C(C)C=C2C)C=C1C#N
Asn0058	CCOC(=O)CN(C(=O)CSC1=NN=C(N1CCCN(C)C)C1=CC=NC=C1)C1=CC=CC=C1
Asn0059	CCC1=NN=C(NC(=O)CSC2=NN=C(N2C2=CC=C(C)C=C2)C2=C(O)C=CC=C2)S1
Asn0060	OC(=O)CSC1=NN=C(CN2N=NC3=C2C=CC=C3)N1CCC1=CC=CC=C1
Asn0061	CN1C(COC2=CC=CC=C2)=NN=C1SCCN1CCOCC1
Asn0062	O=C(N(CC1CCCO1)CC1=CC=CS1)C1=CC2=C(OC1=O)C=CC=C2
Asn0063	COC1=CC(OC)=C(C=C1)\N=C1/OC2=CC(O)=CC=C2C=C1C(=O)NCC1CCCO1
Asn0064	CC1CCCN(C1)S(=O)(=O)C1=CC=C(NC(=O)C2=CC=CC(=C2)N2C=NN=N2)C=C1
Asn0065	COC1=CC=C2NC(=O)C(CN(CC3CCCO3)C(=O)NC3=CC=CC=C3)=CC2=C1
Asn0066	CCOC1=C(O)C=CC(=C1)C1=C(NCC2CCCO2)N2C=CC=CC2=N1
Asn0067	CC1=CC=CC2=C1NC(=O)C(=C2)C(N1CCN(CC1)C1=CC=CC=C1)C1=NN=NN1CC1=CC=CC=C1
Asn0068	CC1=C2NC(=O)C(=CC2=C(C)C=C1)C(N1CCOCC1)C1=NN=NN1C1CCCC1
Asn0069	COC1=CC=CC(=C1)C1=NN(CCC(O)=O)N=N1
Asn0070	CCN1C(SCC(=O)N2CCC3=C(C2)C=CC=C3)=NC2=C1C(=O)N(C)C(=O)N2C
Asn0071	CCN1C(SCC(=O)NC2=NC3=C(S2)C=C(OC)C=C3)=NC2=C1C(=O)N(C)C(=O)N2C
Asn0072	CCCCN1C(SCC(=O)NC2=NN=C(S2)C(C)C)=NC2=C1C(=O)N(C)C(=O)N2C
Asn0073	COC1=C(OC)C=C(C=C1)C1=NN(CC(=O)N(CC(=O)NCCC(C)C)C2=CC=CC=C2)N=N1
Asn0074	COCCN1C(CC2=CC=CC=C2)=NN=C1SCC(=O)N(C)C
Asn0075	CCN1C(CNC2=CC=C(C)C=C2)=NN=C1SCC(=O)NCC1=CC=CC=C1
Asn0076	CCOC1=C(OCC)C=C(C=C1)C1=NNC(=NC2=C1C=C(OC)C=C2)C1=CC=CS1
Asn0077	CC1=C2NC(=O)C(CN(CC3=CC=CO3)S(=O)(=O)C3=CC4=C(OCCO4)C=C3)=CC2=CC=C1
Asn0078	CC1=C2NC(=O)C(CN(CC3=CC=CO3)S(=O)(=O)C3=CC4=C(OCCO4)C=C3)=CC2=C(C)C=C1
Asn0079	CCN(CC)S(=O)(=O)C1=CC=C(C=C1)C1=NN=C(O1)SCC(=O)N1C(C)CC2=C1C=CC=C2
Asn0080	CC1CCN(CC1)S(=O)(=O)C1=CC=C(NC(=O)CN2N=NC(=N2)C2=CC=CC=C2F)C=C1
Asn0081	CN1C2=C(N(CC3=CC=CC=C3)C(SCC3=CC=CN=C3)=N2)C(=O)N(C)C1=O
Asn0082	COC1=CC(NC2=NC=CC=C2C(O)=O)=CC=C1
Asn0083	CC(C)C1=CC=C(NC2=NC=CC=C2C(O)=O)C=C1
Asn0084	COCCNC(=O)C(N(C(=O)C1=C(N)C(=NS1)C(N)=O)C1=CC=C(C)C(C)=C1)C1=CC=C(C)O1
Asn0085	CCOC1=CC(NC(=O)CSC2=NC3=C(N2C(C)C)C(=O)N(C)C(=O)N3C)=C(OCC)C=C1
Asn0086	COC1=CC(C(=O)CSC2=NC3=C(N2C(C)C)C(=O)N(C)C(=O)N3C)=C(OC)C=C1
Asn0087	CCOC1=CC2=C(C=C1)N=C(NC(=O)CSC1=NC3=C(N1C(C)C)C(=O)N(C)C(=O)N3C)S2
Asn0088	COC1=C(C=CC(=C1)S(=O)(=O)N(CC1=CC=C(C)C=C1)C1CCCCC1)N1C=NN=N1
Asn0089	COC1=C(C=CC(=C1)S(=O)(=O)N(CC1=CC=CO1)C1CCCC1)N1C=NN=N1
Asn0090	OC(=O)C1=CC=CN=C1NC1=CC=CC=C1
Asn0091	OC(=O)C1=CC=CN=C1NC1=CC=CC2=CC=CC=C12
Asn0092	CC1=C(Cl)C=C(NC2=NC=CC=C2C(O)=O)C=C1
Asn0093	OC(=O)C1=CC=CN=C1NC1=CC=CC(F)=C1
Asn0094	OC(=O)C1=CC=CN=C1NC1=CC=C(F)C(Cl)=C1
Asn0095	OC(=O)C1=CC=CN=C1NC1=CC=C(C=C1)[N+]([O-])=O
Asn0096	OC(=O)C1=CC=CN=C1NC1=CC=CC=C1[N+]([O-])=O
Asn0097	OC(=O)C1=CC=CN=C1NC1=CC(=CC=C1)[N+]([O-])=O
Asn0098	O=C(N1CCCCC1)C1=CC=CN=C1NC1=CC=C(OC2=CC=CC=C2)C=C1
Asn0099	O=C(NCC1=CC=CC=C1)C1=CC=CN=C1NC1=CC=C(OC2=CC=CC=C2)C=C1
Asn0100	CC1=C(Cl)C=CC=C1NC1=NC=CC=C1C(=O)NCC1=CC=CC=C1
Asn0101	O=C(N1CCCCC1)C1=CC=CN=C1NC1=CC=C(OCC2=CC=CC=C2)C=C1
Asn0102	O=C(NCCC1=CC=CC=C1)C1=CC=CN=C1NC1=CC=C(OCC2=CC=CC=C2)C=C1
Asn0103	FC1=CC=C(NC2=NC=CC=C2C(=O)NC2CCCC2)C=C1
Asn0104	O=C(NC1CCCCC1)C1=CC=CN=C1NC1=CC2=C(OCCO2)C=C1
Asn0105	FC1=C(NC2=NC=CC=C2C(=O)NC2CCCC2)C=CC=C1
Asn0106	FC1=C(NC2=NC=CC=C2C(=O)N2CCCCC2)C=CC=C1
Asn0107	O=C(NCC1=CC=CS1)C1=CC=CN=C1NC1=CC=C(OC2=CC=CC=C2)C=C1
Asn0108	COC1=CC=C(NC2=NC=CC=C2C(=O)NCC2=CC=CS2)C=C1
Asn0109	FC(F)(F)C1=CC(NC2=NC=CC=C2C(=O)NCC2=CC=CS2)=CC=C1
Asn0110	O=C(NCC1=CC=CS1)C1=CC=CN=C1NC1=CC=C(OCC2=CC=CC=C2)C=C1
Asn0111	OC(=O)C1=CC=CN=C1NC1=CC2=C(CCC2)C=C1
Asn0112	O=C(NC1CCCCC1)C1=CC=CN=C1NC1=CC2=C(CCC2)C=C1
Asn0113	FC1=C(NC2=NC=CC=C2C(=O)NCC2=CC=CS2)C=CC=C1
Asn0114	CCOC1=C(NC2=NC=CC=C2C(=O)NCC2=CC=CS2)C=CC=C1
Asn0115	O=C(NC1CCCCC1)C1=CN=C(NC2=CC=C(OC3=CC=CC=C3)C=C2)C=C1
Asn0116	O=C(NC1CCCC1)C1=CN=C(NC2=CC=C(OC3=CC=CC=C3)C=C2)C=C1
Asn0117	O=C(NCC1=CC=CC=C1)C1=CN=C(NC2=CC=C(OC3=CC=CC=C3)C=C2)C=C1
Asn0118	O=C(NCCC1=CC=CC=C1)C1=CN=C(NC2=CC=C(OC3=CC=CC=C3)C=C2)C=C1
Asn0119	CCC1=CC=CC=C1NC1=NC=C(C=C1)C(O)=O
Asn0120	CC1=CC=C(C)C(NC2=NC=C(C=C2)C(=O)NCCC2=CC=CC=C2)=C1
Asn0121	O=C(NCCC1=CC=CC=C1)C1=CN=C(NC2=CC=CC=C2)C=C1
Asn0122	OC(=O)C1=CN=C(NC2=CC=C(Cl)C=C2)C=C1
Asn0123	ClC1=CC=C(NC2=NC=C(C=C2)C(=O)N2CCCCC2)C=C1
Asn0124	COC1=CC=C(NC2=NC=C(C=C2)C(O)=O)C=C1
Asn0125	COC1=CC=C(NC2=NC=C(C=C2)C(=O)N2CCCCC2)C=C1
Asn0126	CC1=CC=C(NC2=NC=C(C=C2)C(=O)NC2CCCCC2)C(C)=C1
Asn0127	ClC1=CC=CC=C1NC1=NC=C(C=C1)C(=O)NCC1=CC=CC=C1
Asn0128	CC1=CC=C(NC2=NC=C(C=C2)C(=O)N2CCCCC2)C=C1
Asn0129	CC1=CC=C(NC2=NC=C(C=C2)C(=O)NCCC2=CC=CC=C2)C=C1
Asn0130	O=C(NCC1=CC=CC=C1)C1=CN=C(NC2=CC=C(OCC3=CC=CC=C3)C=C2)C=C1
Asn0131	O=C(NCCC1=CC=CC=C1)C1=CN=C(NC2=CC=C(OCC3=CC=CC=C3)C=C2)C=C1
Asn0132	O=C(NCC1=CC=CS1)C1=CN=C(NC2=CC=C(OC3=CC=CC=C3)C=C2)C=C1
Asn0133	O=C(NCC1=CC=CS1)C1=CN=C(NC2=CC=C(OCC3=CC=CC=C3)C=C2)C=C1
Asn0134	CCCCOC1=CC=C(NC2=NC=CC=C2C(O)=O)C=C1
Asn0135	ClC1=CC=C(C=C1)S(=O)(=O)N1CCC(CC1)C(=O)NCCC1=CC=C2OCOC2=C1
Asn0136	COC1=CC=C(CN(CC2=CC3=CC4=C(OCO4)C=C3NC2=O)C(=O)NC2CCCCC2)C=C1
Asn0137	O=C(NC1CCCC1)C(N(C(=O)C1=CC=CO1)C1=CC=C2OCCOC2=C1)C1=CC=CS1
Asn0138	C(N1CCC2=C(C1)C=CC=C2)C1=NN=NN1CC1=CC2=C(OCO2)C=C1
Asn0139	ClC1=CC=CC(NC2=C(C=CC=N2)C(=O)NC2CCCCC2)=C1
Asn0140	ClC1=CC=CC(NC2=C(C=CC=N2)C(=O)NC2CCCC2)=C1
Asn0141	ClC1=CC=CC(NC2=C(C=CC=N2)C(=O)NCC2=CC=CS2)=C1
Asn0142	ClC1=CC(NC2=NC=CC=C2C(=O)N2CCOCC2)=CC=C1
Asn0143	CC1=CC=C(NC(=O)C2=CN=C(NC3=C(F)C=CC=C3)C=C2)C=C1
Asn0144	C(N1N=NN=C1C(N1CCN(CC1)C1=NC2=C(S1)C=CC=C2)C1=CC=CC=C1)C1=CC=CC=C1
Asn0145	ClC1=CC=CC(NC2=CC=C(C=N2)C(=O)NC2=C(Cl)C=CC=C2)=C1
Asn0146	CC1=CC(=CC=C1)N(CC(=O)NCC1=CC2=C(OCO2)C=C1)C(=O)CCC(=O)NC1=NC=CC=C1
Asn0147	O=C(CCC(=O)N(CC1CCCO1)CC(=O)NCC1=CC2=C(OCO2)C=C1)NC1=NC=CS1
Asn0148	CC(C)C1=CC=C(C=C1)C(N(C(=O)C1=CC=CC=N1)C1=CC=CN=C1)C(=O)NC1CCCCC1
Asn0149	CC1=CC(=CC(C)=C1)N(C(C(=O)NCC1=CC=CO1)C1=CC=NC=C1)C(=O)CN1N=NC2=CC=CC=C12
Asn0150	COC1=CC=C(C=C1)C(=O)CSC1=NN=C(CNC2=NC(=CS2)C2=CC=CC=C2)N1C
Asn0151	CCOC1=CC=CC=C1N(CC(=O)NCC1=CC=CC=C1)C(=O)CCC(=O)NC1=NC=CC(C)=C1
Asn0152	COC1=CC=C(N(CC(=O)NCC2=CC=CC=C2)C(=O)CCC(=O)NC2=NC=CC(C)=C2)C(OC)=C1
Asn0153	COC1=C(C=CC=C1)C(N1CCN(CC1)C1=NC2=C(S1)C=CC=C2)C1=NN=NN1CC1=CC=CC=C1
Asn0154	CC(C)C(N1CCN(CC1)C1=NC2=C(S1)C=CC=C2)C1=NN=NN1CC1=CC=CO1
Asn0155	CC(C)C(N1CCN(CC2=CC=CO2)CC1)C1=NN=NN1CS(=O)(=O)C1=CC=C(C)C=C1
Asn0156	CCOC(=O)CC1=CSC(NC(=O)CSC2=NN=C(C(C)C)N2C)=N1
Asn0157	CCOC1=CC=C(NC2=NCC(=O)N2CC2=CC=CS2)C=C1
Asn0158	COC1=C(C=C(C=C1)C(=O)NC1=CC=C(C=C1)C1=CC=C(C)O1)S(=O)(=O)N1CCOCC1
Asn0159	CC1=CC=C(C=C1)C(N1CCSCC1)C1=NN=NN1CCC1=CC=CC=C1
Asn0160	O=C(NCC1=CC=CC=C1)C1=CC(NC2=C(C=CC=N2)C(=O)NCC2=CC=CC=C2)=CC=C1
Asn0161	O=C(NCCC1=CC=CC=C1)C1=CC(NC2=C(C=CC=N2)C(=O)NCCC2=CC=CC=C2)=CC=C1
Asn0162	CCOC(=O)CNC(=O)CSC1=NC2=C(N=CC=C2)N1C1CCCCC1
Asn0163	O=C(CSC1=NC2=C(N=CC=C2)N1CC1=CC=CC=C1)NCC1=CC=CO1
Asn0164	COC1=CC=C(C=C1)C(=O)CSC1=NN=C(N1CC1CCCO1)C1=CC=CO1
Asn0165	COCCCN1C(SCC(=O)NC2=CC=CC(C)=N2)=NN=C1C1=CC=CO1
Asn0166	CC1CCC(CC1)NC(=O)C1CCN(CC1)C(=O)NC1CCCCC1
Asn0167	CCOC(=O)C1(C)NC(C2C1C(=O)N(C2=O)C1=CC=CC=C1)C1=CC=CC(C)=C1
Asn0168	CC(=O)NC1CC2CCCC(C1)N2S(=O)(=O)C1=CC=CC=C1
Asn0169	CC1=NC(N)=NC(NC2=CC=C(C=C2)C(O)=O)=C1
Asn0170	CC1=CC=C(NC(=O)N2CCCC2C(=O)NCC2=CC=CS2)C=C1
Asn0171	COC1=C(NC(=O)N2CCCC2C(=O)NCCC2=CC=CC=C2)C=CC=C1
Asn0172	COC1=C(NC(=O)N2CCCC2C(=O)NC2=CC=C(NC(C)=O)C=C2)C=CC=C1
Asn0173	CC1=NC2=CC=CC=C2N1C1CCN(CC(=O)NC2=CC=CC=C2Br)CC1
Asn0174	CC1=CC=C(CN2N=NN=C2CN2CCC(CC2)N2N=NC3=CC(=CC=C23)C(F)(F)F)C=C1
Asn0175	CC(C)CCN1C(C(=O)NCC2=CC=CC=C2)C23OC(C)(C=C2)C(C3C1=O)C(=O)NC1=NOC(C)=C1
Asn0176	O=C(CN1C2CCC1CC(C2)NC(=O)NC1=CC=CC=C1)NCC1=CC=CO1
Asn0177	COC(=O)C1=C(NC(=O)CN2CCC(CC2)NC(=O)C2=CC=C(C)C=C2)C=CC=C1
Asn0178	COC(=O)C1=C(NC(=O)CN2CCC(CC2)NC(=O)C2=C(C)C=CC=C2)C=CC=C1
Asn0179	COC(=O)C1=CC(NC(=O)CN2CCC(CC2)NC(=O)C2=CC(OC)=C(OC)C(OC)=C2)=CC=C1
Asn0180	O=C(N(CC1=CC=CO1)CC1=CC2=C(OCO2)C=C1)C1=CC2=CC=CC=C2OC1=O
Asn0181	CC1=CC(NC(=O)CSC2=NC(CCC3CCCC3)=NC3=CC=CC=C23)=NO1
Asn0182	COC1=CC=C2N=C(NCCCNC(=O)C3=CC(OC)=C(OC)C(OC)=C3)C(=CC2=C1)C#N
Asn0183	CCC(C)(C)NC(=O)C(N(C(=O)C1=CSN=N1)C1=CC=C(C)C=C1)C1=CC=CN=C1
Asn0184	BrC1=C(C=CC=C1)C(=O)N1CCC(CC1)C1=NC2=CC=CC=C2S1
Asn0185	CCN(C1CCCCC1)S(=O)(=O)C1=CC=C(C=C1)S(=O)(=O)NCC1=CC=NC=C1
Asn0186	CC(=O)NC1=CC=C(NC2=CC=C(N=N2)N2CCCCC2)C=C1
Asn0187	FC1=CC=C(NC2=NN=C(C=C2)C2=CC=C(F)C=C2)C=C1
Asn0188	FC1=CC=C(C=C1)C1=NN=C(NC2=CC(F)=CC=C2)C=C1
Asn0189	CC1CCCCN1S(=O)(=O)C1=CC=C(NC2=NN=C(C=C2)C2=CC=C(F)C=C2)C=C1
Asn0190	O=S(=O)(NCC1=CC=CC=C1)C1=CC=C(NC2=NN=C(C=C2)C2=CC=CC=C2)C=C1
Asn0191	COC1=C(C=CC=C1)C1=NN=C(NC2=CC(=CC=C2)C(F)(F)F)C=C1
Asn0192	COC1=C(C=CC=C1)C1=NN=C(NC2=CC(=CC=C2)C(C)=O)C=C1
Asn0193	CCN(CC)C(=O)C1=CC=CC(NC2=NN=C(C=C2)C2=C(OC)C=CC=C2)=C1
Asn0194	COC1=CC=C(C=C1)C1=NN=C(NC2=CC=C(C=C2)C(=O)N2CCCCCC2)C=C1
Asn0195	CCN(CC)S(=O)(=O)C1=CC=C(NC2=NN=C(C=C2)C2=CC=C3OCCOC3=C2)C=C1
Asn0196	O=S(=O)(NCC1=CC=CC=C1)C1=CC=C(NC2=NN=C(C=C2)C2=CC=C3OCCOC3=C2)C=C1
Asn0197	CN(C1CCCCC1)C(=O)C1=CC=CC(NC2=NN=C(C=C2)C2=CC=C3OCCOC3=C2)=C1
Asn0198	COC1=CC=CC(NC2=NN=C(C=C2)C2=C(F)C=CC=C2)=C1
Asn0199	FC1=C(C=CC=C1)C1=NN=C(NC2=CC=C(C=C2)S(=O)(=O)N2CCCCC2)C=C1
Asn0200	COC1=C(OC)C=C(C=C1)C1=NN=C(NC2=CC=C(F)C(Cl)=C2)C=C1
Asn0201	COC1=C(OC)C=C(C=C1)C1=NN=C(NC2=C(Br)C=CC=C2)C=C1
Asn0202	CCOC(=O)C1=CC=C(NC2=NN=C(C=C2)C2=CC(OC)=C(OC)C=C2)C=C1
Asn0203	CC(=O)NC1=NC(=CS1)C(=O)NC1=C(C=CC=C1)N1CCCCC1
Asn0204	CCC1OC2=CC=CC=C2N(CC(=O)NC2=C(OC)C=CC=C2)C1=O
Asn0205	CC1=CC=C(CN2N=NC3=C(O)N=C(N=C23)C2CCN(CC2)S(=O)(=O)C2=CC=CC=C2)C=C1
Asn0206	CC1=CC=C(CN2N=NC3=C(O)N=C(N=C23)C2CCN(CC2)C(=O)C2=CC=CS2)C=C1
Asn0207	COC1=C(OC)C=C(C=C1)C1=NOC(=N1)C1CCCN(C1)S(=O)(=O)C1=CC=C(C)C(Cl)=C1
Asn0208	CC1=CC=C(C=C1)C1=NOC(=N1)C1CCCN(C1)C(=O)C1=C(F)C=CC=C1F
Asn0209	O=S(=O)(NC1CC1)C1=CC=C(C=C1)S(=O)(=O)N1CCCC(C1)C1=NC(=NO1)C1=CC=CN=C1
Asn0210	COC1=CC=C(C=C1OC)C(=O)N1CCCC(C1)C1=NC(=NO1)C1=CC=CS1
Asn0211	CC1=CC=C(Cl)C=C1N1CCN(CC1)C(=O)CSC1=NN=C2N1C(C)(C)CC1=CC=CC=C21
Asn0212	CC1=NC2=NC=NN2C(N2CCCC(C2)C(=O)NC2=CC=C3CCCC3=C2)=C1C
Asn0213	ClC1=CC(=CC=C1N1CCC(CC1)C(=O)NCC1=CC=CS1)S(=O)(=O)N1CCOCC1
Asn0214	COC1=C(OC)C=C(NC2=C3N=NN(CC4=C(Cl)C=CC=C4)C3=NC(=N2)C(C)(C)C)C=C1
Asn0215	CCCCC1=NC(NC2=C(C)C=CC(Cl)=C2)=C2N=NN(CC3=CC=CC=C3)C2=N1
Asn0216	CCCCC1=NC(NC2=CC(Cl)=C(Cl)C=C2)=C2N=NN(CC3=CC=CC=C3)C2=N1
Asn0217	CCCCC1=NC(NC2=CC=C(C=C2)C(=O)OCC)=C2N=NN(CC3=CC=CC=C3)C2=N1
Asn0218	CC(C)CC1=NC(NC2=CC(Cl)=C(Cl)C=C2)=C2N=NN(CC3=CC=CC=C3)C2=N1
Asn0219	CC(C)CC1=NC(NC2=CC=C(C=C2)S(=O)(=O)N2CCCC2)=C2N=NN(CC3=CC=CC=C3)C2=N1
Asn0220	COC1=CC(NC2=C3N=NN(CC4=CC=CC=C4)C3=NC(=N2)C2CC2)=C(OC)C=C1
Asn0221	ClC1=C(CN2N=NC3=C(NC4=CC=C5OCCOC5=C4)N=C(N=C23)C2CC2)C=CC=C1
Asn0222	FC(F)(F)C1=CC=CC(NC2=C3N=NN(CC4=C(Cl)C=CC=C4)C3=NC(=N2)C2CC2)=C1
Asn0223	COC1=C(NC2=C3N=NN(CC4=C(Cl)C=CC=C4)C3=NC=N2)C=C(C)C=C1
Asn0224	COC(=O)C1=C(NC2=C3N=NN(CC4=C(Cl)C=CC=C4)C3=NC=N2)C=CC=C1
Asn0225	CC(=O)NC1=CC=C(NC2=C3N=NN(CC4=C(Cl)C=CC=C4)C3=NC=N2)C=C1
Asn0226	CC(C)C1=CC=C(NC2=C3N=NN(CC4=CC=CC=C4)C3=NC=N2)C=C1
Asn0227	COC1=CC(OC)=C(NC2=C3N=NN(CC4=C(Cl)C=CC=C4)C3=NC(C)=N2)C=C1
Asn0228	CC1=NC(NC2=CC=C3OCOC3=C2)=C2N=NN(CC3=CC=CC=C3)C2=N1
Asn0229	COC(=O)C1=C(NC2=C3N=NN(CC4=CC=CC=C4)C3=NC(C)=N2)C=CC=C1
Asn0230	CC1CCCCN1S(=O)(=O)C1=CC=C(NC2=C3N=NN(CC4=CC=CC=C4)C3=NC(C)=N2)C=C1
Asn0231	CC1=NC(NC2=C(F)C=CC=C2)=C2N=NN(CC3=C(Cl)C=CC=C3)C2=N1
Asn0232	CC1=NC(NC2=CC(=CC=C2)C(F)(F)F)=C2N=NN(CC3=CC=CC=C3)C2=N1
Asn0233	CC1=NC(NC2=CC=C(Cl)C=C2)=C2N=NN(CC3=CC=CC=C3)C2=N1
Asn0234	CCOC(=O)C1=CC=C(NC2=C3N=NN(CC4=CC=CC=C4)C3=NC(C)=N2)C=C1
Asn0235	CCC1=NC(NC2=CC=C3OCOC3=C2)=C2N=NN(CC3=C(Cl)C=CC=C3)C2=N1
Asn0236	CCOC(=O)C1=CC=C(NC2=C3N=NN(CC4=C(Cl)C=CC=C4)C3=NC(CC)=N2)C=C1
Asn0237	CCC1=NC(NC2=CC(OC)=C(OC)C=C2)=C2N=NN(CC3=C(Cl)C=CC=C3)C2=N1
Asn0238	CCC1=C(NC2=C3N=NN(CC4=CC=CC=C4)C3=NC(=N2)C(F)(F)F)C=CC=C1
Asn0239	COC1=C(NC2=C3N=NN(CC4=CC=CC=C4)C3=NC(=N2)C(F)(F)F)C=C(C)C=C1
Asn0240	CC(=O)NC1=CC=C(NC2=C3N=NN(CC4=C(Cl)C=CC=C4)C3=NC(=N2)C(F)(F)F)C=C1
Asn0241	CCOC(=O)C1=CC=C(NC2=C3N=NN(CC4=CC=CC=C4)C3=NC(=N2)C(F)(F)F)C=C1
Asn0242	CC(=O)OC(C(=O)NC1CCCCC1)C1=CC=NC=C1
Asn0243	CC(OC(=O)C1=CC2=C(C=CS2)N1C)C(=O)NCC1=CC=CS1
Asn0244	CCOC(=O)C1=CC=CC=C1NC(=O)CN1CCC(CC1)N1N=NC2=CC(=CC=C12)C(F)(F)F
Asn0245	CN(C)S(=O)(=O)C1=CC=C(NC(=O)CN2CCN(C)CC2)C=C1
Asn0246	CCN1CCN(CC(=O)NC2=CC=C(C=C2)C(C)=O)CC1
Asn0247	CC(=O)C1=CC=CC(NC(=O)N2CCCC2C(=O)NC2=C(C)C=CC(C)=C2)=C1
Asn0248	CC1=NC(NC2=CC(F)=CC=C2C)=C2N=NN(CC3=CC=CC=C3)C2=N1
Asn0249	CC1CCCCN1C(=O)CN1C2=CC=CC=C2C(=O)N(C)CC1=O
Asn0250	CCCC1=NC(NC2=C(F)C=C(F)C=C2)=C2N=NN(CC3=C(Cl)C=CC=C3)C2=N1
Asn0251	CC(C)CC1=NC(NC2=CC(F)=CC=C2C)=C2N=NN(CC3=CC=CC=C3)C2=N1
Asn0252	CC(O)C1=CC=CC(NC2=C3N=NN(CC4=CC=CC=C4F)C3=NC(C)=N2)=C1
Asn0253	CCN1N=C(CC(=O)NC2=NN=C(CC(=O)N3CCCC3)S2)C2=C(C=CC=C2)C1=O
Asn0254	COC1=CC(NC2=NN=C(C=C2)C2=C(F)C=CC=C2)=CC(OC)=C1OC
Asn0255	CCOC1=CC=C(OCC)C(NC(=O)CN2CCN(CC(=O)NC(C)C)CC2)=C1
Asn0256	FC(F)(F)OC1=CC=C(NC(=O)CNCC2=CC=CS2)C=C1
Asn0257	CC1=CC2=C(S1)N=CN=C2NC1=CC=CC=C1O
Asn0258	CC1=CC2=C(S1)N=CN=C2NC1=CC(O)=CC=C1
Asn0259	CC1=CC2=C(S1)N=CN=C2NC1=CC=C(O)C=C1
Asn0260	COC1=CC=C(NC2=NC=NC3=C2C=C(C)S3)C(OC)=C1
Asn0261	CC1=CC=C(C=C1)S(=O)(=O)N1CCCC(C1)NC(=O)N1CCN(CC1)C1=CC=CC=C1
Asn0262	CC1=C(C)C2=C(N=CN=C2NC2=CC3=C(OCO3)C=C2)N1CC1=CC=CO1
Asn0263	CC1=C(C)C2=C(N=CN=C2NC2=CC3=C(OCCO3)C=C2)N1CC1=CC=CO1
Asn0264	CCC1=CC2=C(S1)N=C(C)N=C2NC1=CC=CC=C1O
Asn0265	CN1C(=O)N(C)C2=CC(NC(=O)C3=CC=CC=C3NS(C)(=O)=O)=CC=C12
Asn0266	CCOC(=O)C1=CN=C(SC)N=C1NC1=CC=C(C=C1)C(=O)C1=CC=CC=C1
Asn0267	COC1=CC=C(NC2=C(C(N)=NC(=N2)N2CCOCC2)S(=O)(=O)C2=CC=CC=C2)C=C1
Asn0268	COC1=CC=C(NC2=C(C(N)=NC(N)=N2)S(=O)(=O)C2=CC=CC=C2)C=C1
Asn0269	COC1=CC=CC=C1NC1=C(C(N)=NC(N)=N1)S(=O)(=O)C1=CC=CC=C1
Asn0270	CC1=CC(NC2=CC=CC(=C2)C(O)=O)=NC(C)=N1
Asn0271	ClC1=C(OCC(=O)NCCCNC(=O)C2=CN=CC=N2)C=CC=C1
Asn0272	CCOCCCNC(=O)C1=CC=CN=C1NC1=C(OCC)C=CC=C1
Asn0273	CCOC1=C(NC2=NC=CC=C2C(=O)NCCC2=CC(OC)=C(OC)C=C2)C=CC=C1
Asn0274	CC1=NC2=CC(=CC=C2C(NC2=CC=C(C=C2)S(N)(=O)=O)=C1)C(F)(F)F
Asn0275	CC(=O)NS(=O)(=O)C1=CC=C(NC2=CC(C)=NC3=CC(=CC=C23)C(F)(F)F)C=C1
Asn0276	CC1=NC2=CC(=CC=C2C(NC2=CC(=CC=C2)S(N)(=O)=O)=C1)C(F)(F)F
Asn0277	FC1=CC=CC(NC2=C3CN(CC4=CC=CC=C4)CCC3=NC(=N2)N2CCCC2)=C1
Asn0278	FC1=CC=CC(NC2=C3CN(CC4=CC=CC=C4)CCC3=NC(=N2)C2=CC=NC=C2)=C1
Asn0279	FC1=C(NC2=C3CN(CC4=CC=CC=C4)CCC3=NC(=N2)C2=CC=NC=C2)C=CC=C1
Asn0280	CC1=CC=C(NC2=NC=C(C(O)=O)C(C)=N2)C=C1
Asn0281	COC1=CC=CC(NC2=NC(=NC3=C2CN(CC3)C(=O)OC(C)(C)C)C2=CC=NC=C2)=C1
Asn0282	COC1=CC=CC(NC2=NC(=NC3=C2CN(CC3)C(=O)OC(C)(C)C)N2CCCC2)=C1
Asn0283	CC(C)(C)OC(=O)N1CCC(C1)C1=NC(=CC(NC2=CC=CC=C2)=N1)C1=NC=CC=C1
Asn0284 (H1)	CC(C)C1=NNC(=C1)C(=O)N1CCC2=NC(=NC(NC3=CC(F)=CC=C3)=C2C1)C1=CC=NC=C1
Asn0285 (H2)	CCC1=NNC(C(=O)N2CCC3=NC(=NC(NC4=CC(F)=CC=C4)=C3C2)C2=CC=NC=C2)=C1C
Asn0286	CCC1=NN(C)C(C(=O)N2CCC3=NC(=NC(NC4=CC(F)=CC=C4)=C3C2)C2=CC=NC=C2)=C1C
Asn0287	CC1=NC(C)=C(CC(=O)N2CCC3=NC(=NC(NC4=CC(F)=CC=C4)=C3C2)C2=CC=NC=C2)S1
Asn0288	CN(C)C1=NC2=C(C3CCC(C2)N3C(=O)OC(C)(C)C)C(NC2=CC=CC=C2)=N1
Asn0289	CC(C)(C)C1CCC2=NC(=NC(NC3=CC=C(F)C=C3)=C2C1)C1=CC=NC=C1
Asn0290	CC(C)(C)C1CCC2=NC(=NC(NC3=CC=C(Cl)C=C3)=C2C1)C1=CC=NC=C1
Asn0291	CC(C)(C)C1CCC2=NC(=NC(NC3=CC=C(C=C3)C(F)(F)F)=C2C1)C1=CC=NC=C1
Asn0292	CC(C)(C)C1CCC2=NC(=NC(NC3=CC(=CC=C3)C(F)(F)F)=C2C1)C1=CC=NC=C1
Asn0293	CC(C)(C)C1CCC2=NC(=NC(NC3=CC=C(F)C=C3)=C2C1)C1=CN=CC=C1
Asn0294	CC(C)(C)C1CCC2=NC(=NC(NC3=CC=C(Cl)C=C3)=C2C1)C1=CN=CC=C1
Asn0295	CC(C)(C)C1CCC2=NC(=NC(NC3=CC=C(C=C3)C(F)(F)F)=C2C1)C1=CN=CC=C1
Asn0296	CC(C)(C)C1CCC2=NC(=NC(NC3=CC(=CC=C3)C(F)(F)F)=C2C1)C1=CN=CC=C1
Asn0297	CC(C)(C)OC(=O)NC1CCC2=NC(=NC(NC3=CC=C(Cl)C=C3)=C2C1)C1=CC=NC=C1
Asn0298	CC(C)(C)OC(=O)NC1CCC2=NC(=NC(NC3=CC=C(C=C3)C(F)(F)F)=C2C1)C1=CC=NC=C1
Asn0299	CC(C)(C)OC(=O)NC1CCC2=NC(=NC(NC3=CC(=CC=C3)C(F)(F)F)=C2C1)C1=CC=NC=C1
Asn0300	CC(C)(C)OC(=O)NC1CCC2=NC(=NC(NC3=CC=C(F)C=C3)=C2C1)C1=CN=CC=C1
Asn0301	CC(C)(C)OC(=O)NC1CCC2=NC(=NC(NC3=CC=C(Cl)C=C3)=C2C1)C1=CN=CC=C1
Asn0302	CC(C)(C)OC(=O)NC1CCC2=NC(=NC(NC3=CC=C(C=C3)C(F)(F)F)=C2C1)C1=CN=CC=C1
Asn0303	CC(C)(C)OC(=O)NC1CCC2=NC(=NC(NC3=CC(=CC=C3)C(F)(F)F)=C2C1)C1=CN=CC=C1
Asn0304	CC(C)(C)OC(=O)N1CCC(C1)C1=NC(=CC(NC2=CC=C(Cl)C=C2)=N1)C1=CC=NC=C1
Asn0305	CC(C)(C)OC(=O)N1CCCC(C1)C1=NC(=CC(NC2=CC=C(Cl)C=C2)=N1)C1=CC=NC=C1
Asn0306	CC(C)(C)OC(=O)N1CCCC(C1)C1=NC(=CC(NC2=CC=C(C=C2)C(F)(F)F)=N1)C1=CC=NC=C1
Asn0307	CC(C)(C)OC(=O)N1CCCC(C1)C1=NC(=CC(NC2=CC(=CC=C2)C(F)(F)F)=N1)C1=CC=NC=C1
Asn0308	CC(C)(C)OC(=O)N1CCC(C1)C1=NC(=CC(NC2=CC(=CC=C2)C(F)(F)F)=N1)C1=CC=NC=C1
Asn0309	CC(C)(C)OC(=O)N1CCCC1C1=NC(=CC(NC2=CC=CC=C2)=N1)C1=CC=NC=C1
Asn0310	CC(C)(C)OC(=O)N1CCCC(C1)C1=NC(=CC(NC2=CC=CC=C2)=N1)C1=CC=NC=C1
Asn0311	CC1=C(NC2=NC(=NC3=C2CN(CC3)C(=O)C(C)(C)C)C2=CC=NC=C2)C=CC=C1Cl
Asn0312	CC1=C(Cl)C=C(NC2=NC(=NC3=C2CN(CC3)C(=O)C(C)(C)C)C2=CC=NC=C2)C=C1
Asn0313	CC1=CC=C(Cl)C=C1NC1=NC(=NC2=C1CN(CC2)C(=O)C(C)(C)C)C1=CC=NC=C1
Asn0314	CC(C)(C)C(=O)N1CCC2=C(C1)C(NC1=CC=C(C=C1)C(F)(F)F)=NC(=N2)C1=CC=NC=C1
Asn0315	COC1=C(NC2=NC(=NC3=C2CN(CC3)C(=O)C(C)(C)C)C2=CC=NC=C2)C=C(C=C1)C(F)(F)F
Asn0316	CC(C)(C)C(=O)N1CCC2=C(C1)C(NC1=CC(OC(F)(F)F)=CC=C1)=NC(=N2)C1=CC=NC=C1
Asn0317	CC1=CC(NC2=NC(=NC3=C2CN(CC3)C(=O)C(C)(C)C)C2=CC=NC=C2)=C(Cl)C=C1
Asn0318	CC(C)(C)C(=O)N1CCC2=C(C1)C(NC1=C(C=CC(Cl)=C1)C(F)(F)F)=NC(=N2)C1=CC=NC=C1
Asn0319	CC(C)(C)C(=O)N1CCC2=C(C1)C(NC1=CC=CC(=C1)C(F)(F)F)=NC(=N2)C1=CC=NC=C1
Asn0320	CC(C)(C)OC(=O)N1C2CCC1C1=C(C2)N=C(N=C1NC1=CC(F)=CC=C1)C1=CC=NC=C1
Asn0321	CC(C)(C)C(=O)N1CCC2=C(C1)C(NC1=C(C=C(F)C=C1)C(F)(F)F)=NC(=N2)C1=CC=NC=C1
Asn0322	CC1=CC(NC2=CC=CC(=C2)C(=O)NC(C)(C)CN2CCCCC2)=NC(C)=N1
Asn0323	CN1C=C(CCNC(=O)C2=CC(NC3=NC(C)=NC(C)=C3)=CC=C2)C2=CC(F)=CC=C12
Asn0324	CCN(CC)CCOC1=C(Br)C=CC2=C1SC1=C2C(=O)N2CCCC2=N1
Asn0325	CC1=CC(NC2=NC=NC(NC3=C(C)C=CC(C)=C3)=C2[N+]([O-])=O)=C(C)C=C1
Asn0326	CC1=CC=C(NC2=C3C=CC=CC3=CC=C2)C=C1
Asn0327	O=C(NCC1=CC=CC=C1)C1=CC(=CC=C1)S(=O)(=O)N1CCOCC1
Asn0328	[O-][N+](=O)C1=C(NC2=CC=CC=C2)C=CC(Cl)=C1
Asn0329	O=C1OC2=C(C=CC=C2)N1CN1C(=O)OC2=C1C=CC=C2
Asn0330	CC(=O)NC1=C(NC2=CC=CC=C2)C=CC(=C1)[N+]([O-])=O
Asn0331	BrC1=CC=C(NC2=NC=NC3=C2C2=C(CCCC2)S3)C=C1
Asn0332	N(C1=CC=CC=C1)C1=NC(=CC(=N1)C1=CC=CC=C1)C1=CC=CC=C1
Asn0333	CCCCOC1=CC=C(NC2=NC(=CC(=N2)C2=CC=CC=C2)C2=CC=CC=C2)C=C1
Asn0334	CC1C(N(C)C(CC1(O)C1=CC=CC=C1)C1=CC=CC=C1)C1=CC=CC=C1
Asn0335	CC1=NN(C(C)=C1)C1=CC(NC2=CC=CC=C2C)=NC(C)=N1
Asn0336	COC1=CC=C(NC2=NC=NC3=C2C2=C(CCCC2)S3)C=C1
Asn0337	CCOC(=O)CN1C(=O)C(=NC2=C1C=CC=C2)C1=CC(Br)=CC=C1N
Asn0338	CC1=CC(C)=C(NC2=CC(C)=NC(NC3=C(C)C=C(C)C=C3)=N2)C=C1
Asn0339	CC1=NC(NC2=CC=C(C)C(C)=C2)=NC(NC2=CC=C(C)C(C)=C2)=C1
Asn0340	COC(=O)C1=C(C)NC2=C(C1C1=CC=C(C=C1)C1=CC=CC=C1)C(=O)CC(C)(C)C2
Asn0341	[O-][N+](=O)C1=C(NC2=CC=CC=C2)C=C2N(CC3=CC=CC=C3)C(=O)N(CC3=CC=CC=C3)C2=C1
Asn0342	CN(C1=CC=CC=C1)C1=C(C(C)=NC(NC2=CC=C(C)C=C2C)=N1)[N+]([O-])=O
Asn0343	CCOC1=CC=C(NC2=NC(N(C)C3=CC=CC=C3)=C(C(C)=N2)[N+]([O-])=O)C=C1
Asn0344	CC1=CC(C)=C(NC2=NC(C)=NC(NC3=C(C)C=C(C)C=C3)=C2[N+]([O-])=O)C=C1
Asn0345	CC1=CC=C(NC2=NC(C)=NC(NC3=CC=C(C)C=C3)=C2[N+]([O-])=O)C=C1
Asn0346	FC1=C(C=CC=C1)C(=O)NC1=C(C#N)C2=C(CCCC2)S1
Asn0347	COC1=CC=CC=C1NC1=C(C(C)=NC(NC2=C(OC)C=CC=C2)=N1)[N+]([O-])=O
Asn0348	CC(=O)NC1=CC=C(NC2=NC(NC3=CC=C(NC(C)=O)C=C3)=C(C=N2)[N+]([O-])=O)C=C1
Asn0349	[O-][N+](=O)C1=C(NC2=CC=CC(Cl)=C2)N=C(NC2=CC(Cl)=CC=C2)N=C1
Asn0350	CCOC(=O)C1=C(C)NC(C(C)=O)=C1C
Asn0351	CCN(CC)C1=CC2=C(C=C1)C(Cl)=C(Br)C(=O)O2
Asn0352	CC1=NC(=NC(NC2=CC=C(Br)C=C2)=C1)C1=CC=CC=C1O
Asn0353	CN(C1=CC=CC=C1)C1=NC(NC2=CC=C(Cl)C(Cl)=C2)=NC(C)=C1[N+]([O-])=O
Asn0354	CN(C1=CC=CC=C1)C1=NC(NC2=CC(Cl)=CC=C2Cl)=NC(C)=C1[N+]([O-])=O
Asn0355	CC1=C(C(NC2=C(C=CC=C2)C(O)=O)=NC(NC2=C(C=CC=C2)C(O)=O)=N1)[N+]([O-])=O
Asn0356	[O-][N+](=O)C1=C(NC2=CC=CC=C2)C=C(Br)C=N1
Asn0357	[O-][N+](=O)C1=C(NC2=CC=CC=C2)N=C(NC2=CC=CC=C2)C=C1
Asn0358	CCCCOC(=O)C1=CC=C(NC2=CC=C(C=N2)[N+]([O-])=O)C=C1
Asn0359	ClC1=CC=CC(NC2=NC=NC3=C2C2=C(CCCC2)S3)=C1
Asn0360	CC1=C(C)C2=C(S1)N=CN=C2NC1=CC=C(Cl)C=C1Cl
Asn0361	COC1=C(C=CC=C1)C(=O)NC1=C(C(N)=O)C2=C(CCCC2)S1
Asn0362	CC1=CSC(NC2=CC=C(C)C=C2)=N1
Asn0363	CN(C1=CC=CC=C1)C1=NC(NC2=CC=CC(\C=C\C(O)=O)=C2)=NC(C)=C1[N+]([O-])=O
Asn0364	NC(=O)CCN1C(=O)OC2=C1C=CC=C2
Asn0365	CCCCOC(=O)C1=CC=C(NC2=NC(NC3=CC=CC=C3OC)=C(C(C)=N2)[N+]([O-])=O)C=C1
Asn0366	COC1=CC=CC=C1NC1=C(C(C)=NC(NC2=C3C=CC=CC3=CC=C2)=N1)[N+]([O-])=O
Asn0367	COC1=CC=CC=C1NC1=C(C(C)=NC(NC2=CC3=C(C=CC=C3)C=C2)=N1)[N+]([O-])=O
Asn0368	COC1=CC=CC=C1NC1=C(C(C)=NC(NC2=CC=C(Br)C=C2)=N1)[N+]([O-])=O
Asn0369	COC1=CC=CC=C1NC1=C(C(C)=NC(NC2=C(C)C=C(C)C=C2)=N1)[N+]([O-])=O
Asn0370	COC1=CC=CC=C1NC1=C(C(C)=NC(NC2=C(C)C=CC(C)=C2)=N1)[N+]([O-])=O
Asn0371	COC1=CC=CC=C1NC1=C(C(C)=NC(NC2=CC=C(C=C2)C(C)=O)=N1)[N+]([O-])=O
Asn0372	CC1=NC(NC2=C(C)C=CC=C2)=NC(NC2=CC=CC=C2C)=C1
Asn0373	CCC1=CC2=C(S1)N=CN=C2NC1=CC=NC=C1
Asn0374	NS(=O)(=O)C1=CC=C(NC2=C(C=CC=N2)[N+]([O-])=O)C=C1
Asn0375	COC1=C(NC2=C(C=CC=N2)[N+]([O-])=O)C=CC=C1
Asn0376	CCOC(=O)C1=CC=C(NC2=C(C=CC=N2)[N+]([O-])=O)C=C1
Asn0377	[O-][N+](=O)C1=C(NC2=CC=C(Cl)C=C2)N=CC=C1
Asn0378	COC1=CC=CC=C1NC1=CC=C(C=N1)[N+]([O-])=O
Asn0379	[O-][N+](=O)C1=CC=C(NC2=CC=C(Cl)C=C2)N=C1
Asn0380	CCOC(=O)C1=CC=C(NC2=CC=C(C=N2)[N+]([O-])=O)C=C1
Asn0381	COC1=CC=C(NC2=C(C(C)=NC(NC3=CC=C(C=C3)C(O)=O)=N2)[N+]([O-])=O)C=C1
Asn0382	COC1=CC=C(NC2=C(C(C)=NC(NC3=CC=C(Cl)C(Cl)=C3)=N2)[N+]([O-])=O)C=C1
Asn0383	CCOC1=CC=C(NC2=NC(NC3=CC=C(OC)C=C3)=C(C(C)=N2)[N+]([O-])=O)C=C1
Asn0384	CCOC1=CC=C(NC2=CC(C)=NC(NC3=CC=C(OCC)C=C3)=N2)C=C1
Asn0385	COC1=CC=C(C=C1)N(CC(=O)NCCC1=CCCCC1)S(=O)(=O)C1=CC=CC=C1
Asn0386	CCCOC1=CC=C(CSC2=NN=CN2)C=C1
Asn0387	COC1=CC=C(C=C1)C1=NC2=C(C=C(Cl)C=C2)C(=C1)C1=CC=CC=C1
Asn0388	[O-][N+](=O)C1=C(NC2=CC=CC=C2)C=C(Cl)C(=C1)S(=O)(=O)C(F)(F)F
Asn0389	CCOC1=CC=C(OCC)C2=C1SC(C)=N2
Asn0390	CCOC(=O)C1=CC=C(NC(=O)C2=CC(=CC=C2)S(=O)(=O)N2CCOCC2)C=C1
Asn0391	OC1=CC=CC=C1C1=NC2=C(C=CC=C2)C(NC2=CC=CC(F)=C2)=N1
Asn0392	CCOC(=O)C1=C(NC2=CC=CC=C2)N=C(SC)N=C1
Asn0393	CCCCOC1=CC=C(NC2=C(C=NC(SC)=N2)C(=O)OCC)C=C1
Asn0394	CCOC(=O)C1=C(NC2=CC=CC=C2)N=C(N=C1)C1=CC=CC=C1
Asn0395	CCOC(=O)C1=C(NC2=CC=C(C)C=C2)N=C(N=C1)C1=CC=CC=C1
Asn0396	O(C1=CC=CC=C1)C1=CC(=NC(=N1)C1=CC=CC=C1)C1=CC=CC=C1
Asn0397	CC1=NN(C(C)=C1)C1=CC(NC2=CC=C(C)C=C2)=NC(=N1)C1=CC=CC=C1
Asn0398	COC1=CC=C(NC2=NC(=NC(=C2)N2N=C(C)C=C2C)C2=CC=CC=C2)C=C1
Asn0399	C1CC2=NN=C(C=C2C2=NON=C12)C1=CC=CC=C1
Asn0400	O=C(CN1CCOCC1)N1CCC2=CC=CC=C2C1CN1C(=O)C2=C(C=CC=C2)C1=O
Asn0401	CCOC1=CC=C(NC2=NC(NC)=NC(C)=C2[N+]([O-])=O)C=C1
Asn0402	O=C(N1C=CC2=C(C=CC=C2)C1C#N)C1=CC=CC=C1
Asn0403	COC1=CC2=C(NC3=CC(Cl)=C(Cl)C=C3)C=C(C)N=C2C=C1
Asn0404	CC1=CC=C(NC2=C(CC=C)C(C)=NC(=N2)C2=CC=CC=C2)C=C1
Asn0405	COC1=CC=C(NC2=C(CC=C)C(C)=NC(=N2)C2=CC=CC=C2)C=C1
Asn0406	CSC1=NC(NC2=CC=CC=C2)=C(CC=C)C(C)=N1
Asn0407	CSC1=NC(NC2=CC=C(C)C=C2)=C(CC=C)C(C)=N1
Asn0408	CSC1=NC(NC2=CC=C(C=C2)[N+]([O-])=O)=C(CC=C)C(C)=N1
Asn0409	CSC1=NC(NC2=CC=C(C=C2)C(C)=O)=C(CC=C)C(C)=N1
Asn0410	[O-][N+](=O)C1=CC(=CC=C1NC1=CC=CC=C1)S(=O)(=O)NC1=CC=CC=C1
Asn0411	CCOC1=CC=C(NC(=O)C2=C(O)C=C3C=CC=CC3=C2)C=C1
Asn0412	O=C(NC1=NN=C(CCC2=CC=CC=C2)S1)C1=CC=CC=C1
Asn0413	CC1=NC2=C(C3=C1NC1=C3C=CC=C1)C(=O)CC(C)(C)C2
Asn0414	OC(=O)C1=C(O)C=C(C=C1)N1C(=O)C2=C(C=CC=C2)C1=O
Asn0415	CCOC1=CC=C(NC2=C(C(C)=NC(NC3=CC=C(O)C=C3)=N2)[N+]([O-])=O)C=C1
Asn0416	C1=NC2=C(C=CC=C2)N1C1=CC=CC=C1
Asn0417	COC1=CC(=CC(OC)=C1OC)C(=O)NC1=C(C(N)=O)C2=C(CCCC2)S1
Asn0418	CN1CCN(CC1)S(=O)(=O)C1=CC=C(Cl)C=C1
Asn0419	CCOC(=O)C1=C(C)NC2(O)C3=C(C=CC=C3)C(=O)C12O
Asn0420	COC(=O)C1=C(C)NC2=C(C1C1=CC=CC=C1)C(=O)CC(C)(C)C2
Asn0421	O=C1NC=NC2=C1C(=CS2)C1=CC=CS1
Asn0422	BrC1=C(C=CC=C1)C(=O)NC1=C(C#N)C2=C(CCCC2)S1
Asn0423	CN1C2=C(N(CC3=CC=CC=C3)C(SCCO)=N2)C(=O)N(CC2=CC=CC=C2)C1=O
Asn0424	ClC1=CC=C(C=C1)C1=N\C(=C/C2=CC=CN=C2)C(=O)O1
Asn0425	NC1=C(C=CC=C1)C1=NC2=C(C=CC=C2)C(=O)O1
Asn0426	COC1=CC=C(NC2=CC(C)=C3C=CC=CC3=N2)C=C1
Asn0427	CC1=CC=C(NC2=CC(C)=C3C=CC=CC3=N2)C=C1
Asn0428	CC1=CC2=C(C=C1)N=C(NC1=CC=CC=C1)C=C2C
Asn0429	CC1(C)CC(=O)C2=C(C1)C1=C3C=CC=CC3=CC=C1NC2C1=CC=CO1
Asn0430	CC1=C(SCCO1)C(=O)NC1=CC=CC=C1
Asn0431	OC(=O)CCSC1=NC2=C(S1)C=CC=C2
Asn0432	CC1=CC(C)=NC(NC2=C(C=CC=C2)C(O)=O)=N1
Asn0433	CCCCOC1=CC=C(C=C1)S(=O)(=O)N1CCCCCC1
Asn0434	COC1=C2N=C(C)C=C(NC3=C(C)C=CC=C3)C2=CC=C1
Asn0435	OC(=O)C1=C(C=CC=C1)C(=O)NC1=CC=C(NC2=CC=CC=C2)C=C1
Asn0436	COC1=CC=C(OC)C(NC2=NC3=C(C=CC=C3)C(C)=C2)=C1
Asn0437	CC1=CC(=CC=C1)C1=N\C(=C/C2=CN=CC=C2)C(=O)O1
Asn0438	CCOC1=CC=C(NC2=CC(NC3=CC=C(OCC)C=C3)=NC(C)=N2)C=C1
Asn0439	CC1=C(C(NC2=CC=CC(Cl)=C2)=NC(NC2=CC(Cl)=CC=C2)=N1)[N+]([O-])=O
Asn0440	CCC1=CC=CC=C1NC1=NC(N(C)C2=CC=CC=C2)=C(C(C)=N1)[N+]([O-])=O
Asn0441	COC1=CC(NC2=NC3=CC=CC=C3N=C2NS(=O)(=O)C2=CC=C(C)C=C2)=CC=C1
Asn0442	CCC1=CC=CC=C1NC1=NC2=CC=CC=C2N=C1NS(=O)(=O)C1=CC=CC=C1
Asn0443	COC1=CC=C(Cl)C=C1NC(=O)C1=CC=CN=C1
Asn0444	C1CN(CCN1)C1=NC2=CC=CC=C2C=C1
Asn0445	COC1=CC2=C(NC3=CC=C(C=C3)C(O)=O)C=C(C)N=C2C=C1
Asn0446	COC1=CC2=C(NC3=C(C=CC=C3)C(O)=O)C=C(C)N=C2C=C1
Asn0447	CCCCOC1=CC=C(C=C1)S(=O)(=O)N1C(C)=NC2=C1C=CC=C2
Asn0448	CCOC1=CC=C(NC2=CC3=C(C=CC=C3)C=C2)C=C1
Asn0449	CC1=CC(C)=C(NC2=C(C)C=C3C=CC(C)=CC3=N2)C=C1
Asn0450	CC1=CC2=NC(NC3=CC=CC=C3)=C(C)C=C2C=C1
Asn0451	NC1=C(C(NC2=CC=C(C=C2)S(N)(=O)=O)=NC=N1)[N+]([O-])=O
Asn0452	CC1=CC(NC2=NC=NC(N)=C2[N+]([O-])=O)=CC(C)=C1
Asn0453	[O-][N+](=O)C1=CC=CC2=C1C=CC=C2S(=O)(=O)N1CCOCC1
Asn0454	CC1=C(C)C=C(NC2=NC(NC3=CC(C)=C(C)C=C3)=C(F)C=N2)C=C1
Asn0455	COC1=C(OC)C=C(CCN2C(=O)C3C4CC(C=C4)C3C2=O)C=C1
Asn0456	NC1=NC=NC2=C1C=NN2C1=CC=CC=C1
Asn0457	NC(=O)C1=C(NC(=O)C2=CC=CN=C2)SC2=C1CCCC2
Asn0458	NC(=O)C1=C(NC(=O)C2=CC=C(Br)C=C2)SC2=C1CCCC2
Asn0459	NC(=O)C1=C(NC(=O)\C=C\C2=CC=CC=C2)SC2=C1CCCC2
Asn0460	NC(=O)C1=C(NC(=O)C2=CC=CC=C2Cl)SC2=C1CCCC2
Asn0461	CNC(=O)C1CN(C(=O)C1)C1=CC=C(C)C=C1
Asn0462	CCOC(=O)C1=C(C)N=C2SC=CN12
Asn0463	COC1=CC=C(NC(=O)C2CCCN2C(=O)OC2=CC=CC=C2)C=C1
Asn0464	CC1=C(C)C2=C(S1)N=CN=C2NC1=CC=C(Br)C=C1
Asn0465	CC1=C(C)C2=C(S1)N=CN=C2NC1=CC(C)=C(C)C=C1
Asn0466	[O-][N+](=O)C1=CC=C(NC2=NC3=CC=C(Cl)C=C3C(=N2)C2=CC=CC=C2)C=C1
Asn0467	COC1=CC=CC=C1NC1=NC2=CC=C(Cl)C=C2C(=N1)C1=CC=CC=C1
Asn0468	ClC1=CC=CC=C1C(=O)NC1=CC=NC=C1
Asn0469	COC1=CC=C(OC)C(NS(=O)(=O)CC2=CC=CC=C2)=C1
Asn0470	COC1=CC=C(NC2=NC=NC(NC3=CC=C(OC)C=C3)=C2[N+]([O-])=O)C=C1
Asn0471	COC1=C(NC2=C(C(C)=NC(OC3=CC=C4C=CC=CC4=C3)=N2)[N+]([O-])=O)C=CC=C1
Asn0472	COC1=CC=C(NC2=C(C(C)=NC(OC3=CC=C4C=CC=CC4=C3)=N2)[N+]([O-])=O)C=C1
Asn0473	CC1=C(C(NC2=CC=C(C=C2)C(N)=O)=NC(NC2=CC=C(C=C2)C(N)=O)=N1)[N+]([O-])=O
Asn0474	CC1=C(C)C=C(NC2=NC(NC3=CC(C)=C(C)C=C3)=C(C(C)=N2)[N+]([O-])=O)C=C1
Asn0475	COC1=CC=C(NC2=NC(NC3=CC=C(F)C=C3)=NC(C)=C2[N+]([O-])=O)C=C1
Asn0476	CC(=O)NC1=CC=C(NC2=NC(C)=C(C(NC3=CC=C(NC(C)=O)C=C3)=N2)[N+]([O-])=O)C=C1
Asn0477	COC1=CC2=C(NC3=CC=CC(=C3)C(O)=O)C=C(C)N=C2C=C1
Asn0478	[O-][N+](=O)C1=CC=C(C=C1)S(=O)(=O)NC1=NC2=CC=CC=C2N=C1NC1=CC=CC=C1
Asn0479	NS(=O)(=O)C1=CC=C(NC2=NC3=CC=CC=C3N=C2NS(=O)(=O)C2=CC(=CC=C2)[N+]([O-])=O)C=C1
Asn0480	CC1=CC=C(NC2=NC3=CC=CC=C3N=C2NS(=O)(=O)C2=CC=C(Cl)C=C2)C=C1
Asn0481	ClC1=CC=C(NC2=NC3=CC=CC=C3N=C2NS(=O)(=O)C2=CC=C(Cl)C=C2)C=C1
Asn0482	CC1=CC(C)=C(C#N)C(NC2=CC=CC=C2)=N1
Asn0483	CC1=CC(C)=C(C#N)C(NC2=C(C)C=CC=C2)=N1
Asn0484	CC1=CC(C)=C(C#N)C(NC2=CC(Cl)=CC=C2)=N1
Asn0485	CC1=CC(C)=C(C#N)C(NC2=CC=C(Cl)C=C2)=N1
Asn0486	COC1=CC=CC(NC2=NC(C)=CC(C)=C2C#N)=C1
Asn0487	COC1=CC=C(NC2=NC(C)=CC(C)=C2C#N)C=C1
Asn0488	COC1=C(NC2=NC(C)=CC(C)=C2C#N)C=C(C)C=C1
Asn0489	CC1=CC(C)=C(C#N)C(NC2=CC(=CC=C2)C(F)(F)F)=N1
Asn0490	CC1=CC(C)=C(C#N)C(NC2=CC=CC3=C2C=CC=C3)=N1
Asn0491	CC1=CC(C)=C(C#N)C(NC2=CC(Cl)=CC=C2Cl)=N1
Asn0492	CC1=CC=C(NC2=NC(C)=CC(C)=C2C#N)C(C)=C1
Asn0493	CC1=CC(C)=C(C#N)C(NC2=CC(Br)=CC=C2)=N1
Asn0494	NC1=C(SC2=C1C(NC1=CC=CC=C1)=CC=N2)C(=O)C1=CC=CC=C1
Asn0495	COC(=O)CCC(=O)NC1=C(C#N)C2=C(CCCC2)S1
Asn0496	CNC1=C2C3=C(C=CC=C3)C(=O)C3=C2C(=CC=C3)N(C)C1=O
Asn0497	CC1=C(C=CC=C1)C(=O)N1CCC(CC2=CC=CC=C2)CC1
Asn0498	CC1=CC=C(NC2=NC=NC3=C2C2=C(CCCC2)S3)C(C)=C1
Asn0499	COC1=CC=C(\C=C\C(=O)NC2=C(C(N)=O)C3=C(CCCC3)S2)C=C1
Asn0500	CC(C)C1=CC=C(\C=C\C(=O)NC2=C(C(N)=O)C3=C(CCCC3)S2)C=C1
Asn0501	ClC1=CC=C(C=C1)C1NC(=O)C2=C(N1)C=CC=C2
Asn0502	CC1=CC(NC(=O)C2=CC=C(O2)[N+]([O-])=O)=CC=C1
Asn0503	COC1=CC(NC2=NC(NC3=CC(OC)=CC=C3)=NC(C)=C2[N+]([O-])=O)=CC=C1
Asn0504	CC1=C(C(NC2=CC=C(C=C2)C(O)=O)=NC(NC2=CC=C(C=C2)C(O)=O)=N1)[N+]([O-])=O
Asn0505	CC1=C(C(NC2=CC=C3NC(=O)NC3=C2)=NC(NC2=CC3=C(NC(=O)N3)C=C2)=N1)[N+]([O-])=O
Asn0506	NC1=C(C#N)C(=CC(=N1)C1=CC=C(O)C=C1)C1=CC=CC=C1
Asn0507	COC1=CC=C(C=C1OC)C1=C2CCCCC2=NC(N)=C1C#N
Asn0508	CCCSC1=NC2=C(N1CCC1=CC=CC=C1)C(=O)NC(=O)N2C
Asn0509	OC(=O)C1=C(NC2=CC=CC=N2)C=CC=C1
Asn0510	CN1C(=O)NC(C2=CC(=CC=C2)[N+]([O-])=O)C(C(=O)OCC2=CC=CC=C2)=C1C
Asn0511	CC1=CC=C(NC2=NC3=CC=C(C)C=C3C(=N2)C2=CC=CC=C2)C=C1
Asn0512	FC(F)(F)C1=CC(NC2=NC3=CC=CC=C3C(=N2)C2=CC=CC=C2)=CC=C1
Asn0513	[O-][N+](=O)C1=CC(=CC=C1NC1=CC=CC=C1)C#N
Asn0514	OC(=O)C1=C(C=C(C(NC2=CC=CC=C2)=C1)[N+]([O-])=O)C(O)=O
Asn0515	CC(=O)NC1=CC=C(NC2=CC=CC=C2)C=C1
Asn0516	O=C(CC1=CC=CC=C1)NC1=C(C#N)C2=C(CCCC2)S1
Asn0517	CC1(C)CC(C)(C2=CC=C(C=C2)[N+]([O-])=O)C2=C(C=CC=C2)N1C(=O)C1=CC=CC=C1
Asn0518	NC(=O)C1=C(NC(=O)C2=CC=C(C=C2)C2=CC=CC=C2)SC2=C1CCCC2
Asn0519	CC1=CC(=CC=C1)C(=O)NC1=C(C(N)=O)C2=C(CCCC2)S1
Asn0520	OC1=CC=C2C(=O)N(C(=O)C3=CC=CC1=C23)C1=CC=C(Cl)C=C1
Asn0521	BrC1=CC=C(C=C1S(=O)(=O)N1CCOCC1)C(=O)NC1=CC=C2OCCOC2=C1
Asn0522	O=C(CSCC1=CC=CC=N1)NC1=CC=CC=C1
Asn0523	CC1=C(NC2=NC(NC3=C(C)C=CC=C3)=C(C(C)=N2)[N+]([O-])=O)C=CC=C1
Asn0524	CCOC(=O)CSC1=NC2=C(N1CC1=CC(C)=CC=C1)C(=O)NC(=O)N2C
Asn0525	CC(OC1=CC=C(Cl)C=C1Cl)C(=O)NC1=CC=C(NC2=CC=CC=C2)C=C1
Asn0526	CC1=C(N2C(=O)C3=CC=C(Br)C4=CC=CC(C2=O)=C34)C(C)=NN1
Asn0527	CCOC1=C(O)C=CC(=C1)C1=C(C)C(C)=NC(N)=C1C#N
Asn0528	CC1=NC(NC2=CC(Cl)=CC(Cl)=C2)=C(C#N)C(C)=C1
Asn0529	[O-][N+](=O)C1=C(NC2=CC=CC=C2)C=CN=C1
Asn0530	COC1=CC=C(CC(=O)NC2=NC=CS2)C=C1OC
Asn0531	COC1=CC=C(NC2=C(NS(=O)(=O)C3=CC=CC=C3)N=C3C=CC=CC3=N2)C=C1Cl
Asn0532	CC1=CC=C(C=C1NC(=O)C1=CC2=C(O1)C=CC=C2)C1=NC2=C(O1)C=CC=N2
Asn0533	CC1=CC=CC(NC2=C3C=CC=CC3=NC(C)=C2)=C1
Asn0534	CCOC1=C(O)C=CC(=C1)C1=C(C)C(CC)=NC(N)=C1C#N
Asn0535	CCOC1=C(O)C=CC(=C1)C1=CC(=NC(N)=C1C#N)C1=CC=C(N)C=C1
Asn0536	CC1=NC(NC2=C(Cl)C(Cl)=CC=C2)=C(C#N)C(C)=C1
Asn0537	CC1=NC(NC2=C(Cl)C=CC(=C2)C(F)(F)F)=C(C#N)C(C)=C1
Asn0538	CC1=NC(NC2=CC=C(F)C=C2)=C(C#N)C(C)=C1
Asn0539	CC1=NC(NC2=C(F)C=CC=C2)=C(C#N)C(C)=C1
Asn0540	CCCCOC1=CC=C(NC2=C(C#N)C(C)=CC(C)=N2)C=C1
Asn0541	ClC1=CC=C(C=C1)C1=NC(NC2=CC=CC=C2Cl)=NC2=CC=CC=C12
Asn0542	FC(F)(F)C1=CC(NC2=NC3=CC=CC=C3C(=N2)C2=CC=C(Cl)C=C2)=CC=C1
Asn0543	FC1=CC=C(C=C1)C(=O)NC1=C(C#N)C2=C(CCCC2)S1
Asn0544	CC(=O)C1=C(C)N(C(C)=C1C(C)=O)C1=CC=C(NC2=CC=CC=C2)C=C1
Asn0545	COC1=CC=C(NC(=O)C2=CC=C(NC3=NC(C4=CC=CC=C4)=C4C=C(C)C=CC4=N3)C=C2)C=C1
Asn0546	COC1=CC(NC2=NC(C3=CC=CC=C3)=C3C=C(C)C=CC3=N2)=CC(OC)=C1OC
Asn0547	COC1=CC=CC=C1NC1=NC2=CC=C(Br)C=C2C(=N1)C1=CC=CC=C1
Asn0548	ClC1=C(NC2=NC(C3=CC=CC=C3)=C3C=CC=CC3=N2)C=CC=C1
Asn0549	COC1=CC=CC=C1NC1=NC2=CC=CC=C2C(=N1)C1=CC=C(Cl)C=C1
Asn0550	CC(=O)NC1=CC=C(NC2=NC3=C(C=C(Br)C=C3)C(=N2)C2=CC=CC=C2)C=C1
Asn0551	CC(=O)C1=CC=C(NC2=NC3=C(C=C(Br)C=C3)C(=N2)C2=CC=CC=C2)C=C1
Asn0552	CC(=O)C1=CC=C(NC2=NC(C3=CC=CC=C3)=C3C=C(Cl)C=CC3=N2)C=C1
Asn0553	CC(=O)C1=CC=C(NC2=NC(NC3=CC=C(C=C3)C(C)=O)=C(C(C)=N2)[N+]([O-])=O)C=C1
Asn0554	CN(C1=CC=CC=C1)C1=C(C(C)=NC(NC2=CC=CC=C2)=N1)[N+]([O-])=O
Asn0555	CC1=C(C(NC(=O)N1)C1=CC=C(O)C=C1)C(=O)OCC1CCCO1
Asn0556	COC(=O)C1=CC=C(NC2=NC3=C(C=C(Cl)C=C3)C(=N2)C2=CC=CC=C2)C=C1
Asn0557	COC(=O)C1=CC=C(NC2=NC3=C(C=C(C)C=C3)C(=N2)C2=CC=CC=C2)C=C1
Asn0558	COC1=C(OC)C=C(C=C1)C1=NC2=CC(=NN2C(=C1)C(F)(F)F)C(O)=O
Asn0559	FC1=CC=CC=C1NC1=NC=NC2=C1C1=C(CCCC1)S2
Asn0560	NS(=O)(=O)C1=CC=CC2=C1N=CC=C2
Asn0561	ClC1=CC=C(NC2=NC3=C(C=C(Cl)C=C3)C(=N2)C2=CC=CC=C2)C=C1
Asn0562	COC(=O)C1=CC=C(NC2=NC3=C(C=C(Br)C=C3)C(=N2)C2=CC=CC=C2)C=C1
Asn0563	N(C1=CC=CC=C1)C1=NC(=NC2=CC=CC=C12)C1=CC=CC=C1
Asn0564	CSC1=NC2=CC=CC=C2C(NC2=CC=CC=C2)=N1
Asn0565	COC1=CC=C(C=C1)C(=O)NC1=C(C=CC=C1)C(=O)NC(CC1=CC=C(O)C=C1)C(=O)NC1=CC=C(C)C=C1C
Asn0566	CC1=C(NC2=NN=C(C)C3=CC=CC=C23)C=CC=C1
Asn0567	CCOC(=O)C1=CC=C(NC2=NN=C(C3=CC=CC=C3)C3=CC=CC=C23)C=C1
Asn0568	COC1=CC=C(NC2=NN=C(C3=CC=CC=C3)C3=CC=CC=C23)C=C1
Asn0569	CC1=CC(C)=C(NC2=NN=C(C3=CC=CC=C3)C3=CC=CC=C23)C=C1
Asn0570	CC1=CC(NC2=NN=C(C3=CC=CC=C3)C3=CC=CC=C23)=C(C)C=C1
Asn0571	CC1=C(NC2=NN=C(C3=CC=CC=C3)C3=CC=CC=C23)C=CC=C1
Asn0572	CC1=CC=C(NC2=NN=C(C3=CC=CC=C3)C3=CC=CC=C23)C=C1
Asn0573	ClC1=CC=C(NC2=NN=C(C3=CC=CC=C3)C3=CC=CC=C23)C=C1Cl
Asn0574	COC1=CC=C(NC2=CC(C)=NC3=C(C)C=CC=C23)C=C1OC
Asn0575	CCCCN1C(=N)N(CC(=O)C2=CC=C(Br)S2)C2=CC=CC=C12
Asn0576	CCOC1=CC=C(NC2=NC3=CC=CC=C3N=C2NC2=CC=C(OCC)C=C2)C=C1
Asn0577	CCN(CC)CCSC1=NC2=CC=CC=C2N1CC1=CC=CC=C1
Asn0578	ClC1=C(CC2=CN=C(NC(=O)C3=CC=CS3)S2)C=CC=C1
Asn0579	ClC1=CC=CC(CC2=CN=C(NC(=O)C3=CC=CS3)S2)=C1
Asn0580	COC1=CC=C(CC2=CN=C(NC(=O)C3=CC=CS3)S2)C=C1
Asn0581	O=C(NC1=NC=C(CC2=CC=CC=C2)S1)C1=CC=CS1
Asn0582	CCCN1C(SC\C=C\C)=NC2=C1C(=O)NC(=O)N2C
Asn0583	ClC1=CC=C(NC2=C(NC3=CC=C(Cl)C=C3)N=C3C=CC=CC3=N2)C=C1
Asn0584	O=C(NC1=CC=C(NC2=CC=CC=C2)C=C1)C1(CC2C3=C(C=CC=C3)C1C1=C2C=CC=C1)C#N
Asn0585	CC1=CC(Br)=C(NC2=NC(C)=CC(C)=N2)C=C1
Asn0586	CC1=CC(C)=NC(NC2=C(Br)C=CC=C2)=N1
Asn0587	CC1=CC(C)=NC(NC2=CC=C(O)C=C2)=N1
Asn0588	CC1=CC(C)=NC(NC2=CC=CC3=CC=CC=C23)=N1
Asn0589	OC(=O)C1=CC=C(NC2=NC3=CC=C(Cl)C=C3C(=N2)C2=CC=CC=C2)C=C1
Asn0590	OC(=O)C1=CC=C(NC2=NC3=CC=C(Br)C=C3C(=N2)C2=CC=CC=C2)C=C1
Asn0591	CC1=CC=C2N=C(NC3=CC=C(C=C3)C(O)=O)N=C(C3=CC=CC=C3)C2=C1
Asn0592	CC1=CC=C2N=C(NC3=CC=CC(=C3)C(O)=O)N=C(C3=CC=CC=C3)C2=C1
Asn0593	CN1C2=C(N(CC3=CC=C(C)C=C3)C(SCC=C)=N2)C(=O)NC1=O
Asn0594	CCOC(=O)C1=C2S\C(=C/C3=CC=NC=C3)C(=O)N2C(N)=C(C1C1=CC=NC=C1)C(=O)OC
Asn0595	COC1=C(OC)C(CNCC2=C3C=CC=CC3=C(OC)C=C2)=CC=C1
Asn0596	C(CC1=CNC2=C1C=CC=C2)NC1CCCCC1
Asn0597	COC1=CC=CC=C1NC(=O)C1=CC=CC(NC2=NC(C3=CC=CC=C3)=C3C=C(Br)C=CC3=N2)=C1
Asn0598	BrC1=CC2=C(N=C(NC3=CC=C(C=C3)C(=O)N3CCOCC3)N=C2C=C1)C1=CC=CC=C1
Asn0599	BrC1=CC2=C(N=C(NC3=CC=C(C=C3)C(=O)N3CCCCC3)N=C2C=C1)C1=CC=CC=C1
Asn0600	ClC1=CC2=C(N=C(NC3=CC(=CC=C3)C(=O)N3CCOCC3)N=C2C=C1)C1=CC=CC=C1
Asn0601	BrC1=CC2=C(N=C(NC3=CC(=CC=C3)C(=O)N3CCCCC3)N=C2C=C1)C1=CC=CC=C1
Asn0602	ClC1=CC2=C(N=C(NC3=CC=C(C=C3)C(=O)N3CCCCC3)N=C2C=C1)C1=CC=CC=C1
Asn0603	COCCOC(=O)C1=C(C)NC(=O)NC1C1=CC=C(O1)C1=CC(Cl)=CC=C1Cl
Asn0604	COC1=CC=C(C=C1)C1C2=C(OC(C)=O)C3=C(C=CC=C3)C2=NC2=C1C(=O)N(C)C(=O)N2C
Asn0605	COC1=CC=C(C=C1)C1CC2CC(N1O2)C1=CC=CC=C1
Asn0606	CC1=CN=C(N)C2=C1C1=C(OC2=O)C=CC=C1
Asn0607	CC(C)(C)C1=CC=C(OCC(=O)NCC2=CC=CO2)C=C1
Asn0608	COC1=CC=C2N=C(C)C=C(NC3=CC=C(C)C=C3)C2=C1
Asn0609	O=C1C2C(C3C4=C(C=CC=C4)C2C2=C3C=CC=C2)C(=O)N1CC1=CC=CO1
Asn0610	CC(C)CC(=O)N1CCN(CC2=CC=C(C)C=C2)CC1
Asn0611	CC1=NC2=C(C=CC=C2)C(NC2=CC=C(F)C=C2)=C1
Asn0612	CCOC1=CC=C(NC2=CC(C)=NC3=C2C=CC=C3C)C=C1
Asn0613	CC1=NC2=C(C=CC=C2)C(NC2=CC=C(Cl)C(Cl)=C2)=C1
Asn0614	CC1=CC=C(C)C(NC2=CC(C)=NC3=C2C=CC=C3C)=C1
Asn0615	CC1=CC2=C(C=C1)N=C(C)C=C2NC1=CC=C(C)C(Cl)=C1
Asn0616	COC1=CC=C(Cl)C=C1NC1=CC(C)=NC2=C1C=CC=C2C
Asn0617	CC1=CC2=C(C=C1)N=C(C)C=C2NC1=CC=CC2=C1C=CC=C2
Asn0618	CC1=NC2=C(C=CC=C2)C(NC2=CC=C(C)C(C)=C2)=C1
Asn0619	COC1=CC=C(NC2=CC(C)=NC3=C2C=C(C)C=C3)C=C1
Asn0620	CC1=NC2=C(C=CC=C2)C(NC2=CC=CC(Cl)=C2)=C1
Asn0621	CC1=CC2=C(C=C1)N=C(C)C=C2NC1=CC=C(C=C1)[N+]([O-])=O
Asn0622	CC1=NC2=C(C=CC=C2C)C(NC2=CC=C(Cl)C=C2C)=C1
Asn0623	CCOC1=CC=CC=C1NC1=CC(C)=NC2=C1C=CC=C2
Asn0624	CC1=NC2=C(C=CC=C2C)C(NC2=CC=CC(Br)=C2)=C1
Asn0625	CC1=CC2=C(C=C1)N=C(C)C=C2NC1=CC=C(C)C=C1C
Asn0626	COC1=CC(NC2=CC(C)=NC3=C2C=CC=C3)=CC=C1
Asn0627	CC1=NC2=C(C=CC=C2C)C(NC2=CC=CC=C2Cl)=C1
Asn0628	CC1=NC2=C(C=CC=C2)C(NC2=CC(Cl)=CC=C2C)=C1
Asn0629	COC1=CC=CC=C1NC1=CC(C)=NC2=C1C=CC=C2C
Asn0630	CC1=CC=C(NC2=CC(C)=NC3=C2C=CC=C3C)C=C1
Asn0631	COC1=CC=C(Cl)C=C1NC1=NC2=C(C=C(C)C=C2)C(C)=C1
Asn0632	CC1=CC(NC2=CC=C(C=C2)[N+]([O-])=O)=NC2=C1C=CC=C2
Asn0633	CCOC1=CC=CC=C1NC1=NC2=C(C=CC=C2C)C(C)=C1
Asn0634	COC1=CC=C(NC2=C(C=NC=C2)[N+]([O-])=O)C=C1
Asn0635	O=C1OC2=CC=CC=C2C(=C1)N1CCOCC1
Asn0636	CN1C(=O)CC(S\C1=N/C1=CC=CC(=C1)C(F)(F)F)C(O)=O
Asn0637	CCOC(=O)C1CCN(CC1)C1CC(=O)N(C1=O)C1=CC=C(C=C1)C(=O)OCC
Asn0638	COC1=CC=CC=C1NC1=NC(C2=CC=CC=C2)=C2C=C(C)C=CC2=N1
Asn0639	CC1=CC2=C(C=C1)N=C(NC1=CC=C(C=C1)C(=O)NC1=CC=CC=C1C)N=C2C1=CC=CC=C1
Asn0640	CC1=CC2=C(C=C1)N=C(NC1=CC=C(C=C1)C(=O)NC1=C(C)C=CC=C1C)N=C2C1=CC=CC=C1
Asn0641	[O-]C(=O)C1=C(NC2=CC=CC=C2)C=CC(=C1)[N+]([O-])=O
Asn0642	OC(=O)C1=C(NC2=CC=C(C=C2)[N+]([O-])=O)C=CC=C1
Asn0643	CC1=CC=C(NC2=CC(C)=C(O)C(C)=C2)C=C1
Asn0644	CC(C)C1=CC(NC2=CC(O)=CC=C2)=CC(C(C)C)=C1O
Asn0645	C(NC1=NC=NC2=CC=CC=C12)C1=CC=CC=C1
Asn0646	N(C1=CC=CC=C1)C1=NC=NC2=CC=CC=C12
Asn0647	CC1=CC=CC(NC2=NC=NC3=CC=CC=C23)=C1
Asn0648	CC1=CC=C(NC2=NC=NC3=CC=CC=C23)C=C1
Asn0649	FC(F)(F)C1=CC(NC2=NC=NC3=CC=CC=C23)=CC=C1
Asn0650	COC1=CC=C(NC2=C3C=CC=CC3=NC=N2)C=C1
Asn0651	CCOC(=O)C1=CC=C(NC2=NC=NC3=CC=CC=C23)C=C1
Asn0652	OC1=CC=CC(NC2=NC=NC3=CC=CC=C23)=C1
Asn0653	COC(=O)C1CCC2=C1C(C(=O)OC)=C(NC(=O)C(C)(C)C)S2
Asn0654	CCN1C2=NN=CN2C2=C(C1=O)C1(CCCCC1)CC1=C2C=CC=C1
Asn0655	CSC1=NC(C)=C(CC=C)C(NC2=CC=C(C=C2)C(O)=O)=N1
Asn0656	CC1=C(CC=C)C(NC2=CC=C(O)C=C2)=NC(=N1)C1=CC=CC=C1
Asn0657	CCN1C2=C(C=CC=C2)C2=C1N=C(SCN1C(=O)C3=C(C=CC=C3)C1=O)N=N2
Asn0658	CC1=CC=CC=C1NC1=NC(=NC2=CC=CC=C12)C1=CC=CC=C1
Asn0659	CCC1=CC=CC=C1NC1=NC(=NC2=CC=CC=C12)C1=CC=CC=C1
Asn0660	CC1=CC(NC2=NC(=NC3=CC=CC=C23)C2=CC=CC=C2)=CC=C1
Asn0661	CC1=CC=C(NC2=NC(=NC3=CC=CC=C23)C2=CC=CC=C2)C=C1C
Asn0662	CC1=CC=C(NC2=NC(=NC3=CC=CC=C23)C2=CC=CC=C2)C=C1
Asn0663	[O-][N+](=O)C1=CC(NC2=NC(=NC3=CC=CC=C23)C2=CC=CC=C2)=CC=C1
Asn0664	CC(=O)C1=CC(NC2=NC(=NC3=CC=CC=C23)C2=CC=CC=C2)=CC=C1
Asn0665	CC1=CC(NC2=CC=C(C=C2C(O)=O)[N+]([O-])=O)=CC=C1
Asn0666	ClC1=C(Cl)C=C(C=C1)C(=O)CN1C(=N)N(CCN2CCOCC2)C2=CC=CC=C12
Asn0667	ClC1=CC(CN2CCN(CC2)C(=O)CC2=CC=CC=C2)=CC=C1
Asn0668	COC1=C(OC)C=C(C=C1)C1=NN=CO1
Asn0669	CC1=NN=C(NC2=CC=CC(O)=C2)C2=C1C=CC=C2
Asn0670	CNC(=O)C1=CC=C(NC2=NN=C(C)C3=C2C=CC=C3)C=C1
Asn0671	CN(C)C(=O)C1=CC=C(NC2=NN=C(C)C3=C2C=CC=C3)C=C1
Asn0672	CCN(CC)C(=O)C1=CC=C(NC2=NN=C(C)C3=C2C=CC=C3)C=C1
Asn0673	CC1=NN=C(NC2=CC=C(C=C2)C(=O)N2CCCCC2)C2=C1C=CC=C2
Asn0674	CC1=CC(NC(=O)C2=CC=C(NC3=NN=C(C)C4=C3C=CC=C4)C=C2)=C(C)C=C1
Asn0675	COC1=CC=C(COC(=O)C2=C(C)NC3=C(C2C2=CC=C(C=C2)C2=CC=CC=C2)C(=O)CC(C)(C)C3)C=C1
Asn0676	CC1=CC(NC2=CC=C(C=C2)[N+]([O-])=O)=NC(=N1)C1=CC=CC=C1
Asn0677	NC1=NC=NC2=C1C1=C(CCCCC1)S2
Asn0678	OC(=O)C1=CC=C(C=C1O)N1C=CC=C1
Asn0679	ClC1=CC=C2OC3=C(N=CNC3=O)C2=C1
Asn0680	CN1CCN(CC(=O)NC2=C(OC3=C2C=CC=C3)C(=O)C2CC2)CC1
Asn0681	CC(=O)NC1=C(OC2=C1C=CC=C2)C(=O)C1=CC=C(F)C=C1
Asn0682	N(C1=CC=CC=C1)C1=NC=NC2=C1OC1=C2C=CC=C1
Asn0683	COCCNC(=O)C1=C2N=C(C=C(N2N=C1)C(F)(F)F)C1=CC=C2OCOC2=C1
Asn0684	CCOC(=O)C1=C(NC(=O)CSC2=NN=C(O2)C2=CN=CC=C2)SC(C(C)=O)=C1C
Asn0685	COC(=O)C1=CC=C(NC(=O)CCN2CCCCC2)C=C1
Asn0686	N#CC1=C2CCCC2=C(NCC2=CC=CO2)N2C3=C(C=CC=C3)N=C12
Asn0687	NS(=O)(=O)C1=CC=C(NC2=C3C=CC=CC3=C(N=N2)C2=CC=CC=C2)C=C1
Asn0688	C1C\C(=C/C2=NC3=C(N2)C=CC=C3)C(=C1)N1CCOCC1
Asn0689	OC(COC1=CC(OCC(O)CN2CCOCC2)=CC=C1)CN1CCOCC1
Asn0690	O=C(NC1=C(C#N)C2=C(CCCC2)S1)C1=C2C=CC=CC2=CC=C1
Asn0691	CC1=CC=CC(NC(=O)C2=C(NC(=O)C3=CC=CC=C3)C=CC=C2)=N1
Asn0692	O=C1N(C2=CC=NC=C2)C(=NC2=C1C=CC=C2)C1=CC=CO1
Asn0693	FC1=CC=CC=C1CN1CCN(CC1)C(=O)C1=CC=CO1
Asn0694	CC1=CC2=C(C=C1)N=C(NCCO)N=C2C1=CC=CC=C1
Asn0695	ClC1=CC2=C(C=C1)N=C(NC1=CC=C(C=C1)C(=O)N1CCCC1)N=C2C1=CC=CC=C1
Asn0696	CC1=CC2=C(C=C1)N=C(NC1=CC=C(C=C1)C(=O)N1CCCC1)N=C2C1=CC=CC=C1
Asn0697	COC1=CC=CC(OCC(O)CO)=C1
Asn0698	COC1=C(OC)C=C(C=C1)C1=NN=C(O1)C1=CC=CN=C1
Asn0699	CC1=C(C)C2=C(S1)N=CN=C2NCC1=CC=CO1
Asn0700	CCOC(=O)CC1=NN=C(NC2=CC=C(OC)C=C2)C2=C1C=CC=C2
Asn0701	NC1=CC=C(C=C1)S(=O)(=O)N1CCCC1C(O)=O
Asn0702	CCOC1=C(NC2=CC=NC3=C2C=CC(Cl)=C3)C=CC=C1
Asn0703	CC1=CC=C2N=CN=C(NC3=CC=CC=C3)C2=C1
Asn0704	COC1=C(NC2=NC=NC3=CC=C(C)C=C23)C=CC=C1
Asn0705	COC1=CC=C(C=C1)C1=NN(C=C1C(=O)NC1=CC=CC=C1)C1=CC=CC=C1
Asn0706	CC1=CC(OCC(=O)NCCCN2CCOCC2)=CC(C)=C1Cl
Asn0707	COC(=O)C1=CN=CN1C(C)C1=CC=CC=C1
Asn0708	CCOC(=O)\C=C1/CC(=O)NC2=C(N1)C=C(C)C(C)=C2
Asn0709	CC1=NC2=C(C(N)=C(S2)C(N)=O)C(C)=C1
Asn0710	CC1=C(C)C2=C(S1)N=CN=C2SCC#N
Asn0711	CCOC(=O)CC1=NN=C(NC2=CC=C(C)C=C2)C2=C1C=CC=C2
Asn0712	OCCNC(=O)C1=CC=C(C=C1)C1=NN=C(NC2=CC=C(O)C=C2)C2=C1C=CC=C2
Asn0713	COC(=O)C1=CC=C(NC2=NN=C(C3=CC=C(C=C3)C(=O)NCCO)C3=C2C=CC=C3)C=C1
Asn0714	COC1=CC=C(NC2=NN=C(C3=CC=C(C=C3)C(=O)NCCO)C3=C2C=CC=C3)C=C1
Asn0715	CC1=NC2=CC=CC=C2C(NC2=CC=C(C=C2)[N+]([O-])=O)=C1
Asn0716	CC1=NC2=CC=CC=C2C(NC2=CC(=CC=C2)[N+]([O-])=O)=C1
Asn0717	CC1=NC2=CC=CC=C2C(NC2=CC(Br)=CC=C2)=C1
Asn0718	CC1=CC(NC2=CC(C)=NC3=CC=CC=C23)=C(C)C=C1
Asn0719	CCOC1=CC=C(NC2=CC(C)=NC3=CC=CC=C23)C=C1
Asn0720	CC1=CC(C)=C(NC2=CC(C)=NC3=CC=CC=C23)C=C1
Asn0721	CC1=NC2=CC=CC=C2C(NC2=C(Cl)C=CC=C2)=C1
Asn0722	COC1=CC(NC2=CC(C)=NC3=CC=CC=C23)=C(OC)C=C1
Asn0723	COC1=C(NC2=CC(C)=NC3=CC=CC=C23)C=C(Cl)C=C1
Asn0724	CC(=O)C1=CC=C(NC2=CC(C)=NC3=CC=CC=C23)C=C1
Asn0725	CCOC1=CC=C(NC2=CC(C)=NC3=CC=C(C)C=C23)C=C1
Asn0726	CC1=CC2=C(C=C1)N=C(C)C=C2NC1=CC=CC=C1Br
Asn0727	CC(=O)NC1=CC=C(NC2=CC(C)=NC3=CC=C(C)C=C23)C=C1
Asn0728	COC1=CC(NC2=CC(C)=NC3=CC=C(C)C=C23)=C(OC)C=C1
Asn0729	CCOC1=C(NC2=CC(C)=NC3=CC=C(C)C=C23)C=CC=C1
Asn0730	CC1=CC=C2N=C(C)C=C(NC3=CC=C(F)C=C3)C2=C1
Asn0731	CC(=O)C1=CC=C(NC2=CC(C)=NC3=CC=C(C)C=C23)C=C1
Asn0732	CC1=NC2=C(C)C=CC=C2C(NC2=C(C)C=CC=C2)=C1
Asn0733	COC1=CC=C(NC2=CC(C)=NC3=C(C)C=CC=C23)C=C1
Asn0734	CC(=O)NC1=CC=C(NC2=CC(C)=NC3=C(C)C=CC=C23)C=C1
Asn0735	CCOC1=C(NC2=CC(C)=NC3=C(C)C=CC=C23)C=CC=C1
Asn0736	CC1=NC2=C(C)C=CC=C2C(NC2=CC=C(F)C=C2)=C1
Asn0737	COC1=CC=CC(NC2=CC(C)=NC3=C(C)C=CC=C23)=C1
Asn0738	CC(=O)C1=CC=C(NC2=CC(C)=NC3=C(C)C=CC=C23)C=C1
Asn0739	COC1=CC=CC(NC2=CC(C)=NC3=C(C)C=C(C)C=C23)=C1
Asn0740	CC(=O)C1=CC=C(NC2=CC(C)=NC3=C(C)C=C(C)C=C23)C=C1
Asn0741	COC1=CC=C2N=C(C)C=C(NC3=C(C)C=CC=C3)C2=C1
Asn0742	COC1=CC=C2N=C(C)C=C(NC3=CC=CC(C)=C3)C2=C1
Asn0743	COC1=CC=C2N=C(C)C=C(NC3=CC(Cl)=C(OC)C=C3)C2=C1
Asn0744	COC1=CC=C2N=C(C)C=C(NC3=CC=C(NC(C)=O)C=C3)C2=C1
Asn0745	COC1=CC(NC2=CC(C)=NC3=CC=C(OC)C=C23)=C(OC)C=C1
Asn0746	CCOC1=C(NC2=CC(C)=NC3=CC=C(OC)C=C23)C=CC=C1
Asn0747	CCOC1=CC=C(NC2=CC(C)=NC3=C(OC)C=CC=C23)C=C1
Asn0748	COC1=CC=C(NC2=CC(C)=NC3=C(OC)C=CC=C23)C=C1
Asn0749	COC1=C(NC2=CC(C)=NC3=C(OC)C=CC=C23)C=CC=C1
Asn0750	COC1=C(Cl)C=C(NC2=CC(C)=NC3=C(OC)C=CC=C23)C=C1
Asn0751	COC1=CC(NC2=CC(C)=NC3=C(OC)C=CC=C23)=C(OC)C=C1
Asn0752	CCOC1=C(NC2=CC(C)=NC3=C(OC)C=CC=C23)C=CC=C1
Asn0753	COC1=C2N=C(C)C=C(NC3=CC=C(F)C=C3)C2=CC=C1
Asn0754	CCOC(=O)C1=CC=C(NC2=CC(C)=NC3=C(OC)C=CC=C23)C=C1
Asn0755	COC1=CC=CC(NC2=CC(C)=NC3=C(OC)C=CC=C23)=C1
Asn0756	COC1=C2N=C(C)C=C(NC3=CC=C(C=C3)C(C)=O)C2=CC=C1
Asn0757	CC1=CC(C)=C2N=C(C)C=C(NC3=CC=C(C=C3)C(=O)N3CCOCC3)C2=C1
Asn0758	ClC1=CC=CC(Cl)=C1C(=O)NCC1=CC=NC=C1
Asn0759	COC1=CC=C(C=C1)C(=O)OC(COC1=CC=CC=C1)CN1C=CN=C1
Asn0760	CCOC(=O)C1=C(C)NC2=C(C1C1=CC=C(C)O1)C(=O)CC(C2)C1=CC(OC)=C(OC)C=C1
Asn0761	COC1=CC=C(C=C1)C1=NN(C=C1C(O)=O)C1=CC=CC=C1
Asn0762	COC1=CC=C(C=C1OC)S(=O)(=O)N1CCN(CC1)C1=C(OC)C=CC=C1
Asn0763	COC1=CC=C(NC(=O)CSC2=NN=CN2C)C=C1
Asn0764	BrC1=CC=C2N=CN=C(NC3=CC=C4OCCOC4=C3)C2=C1
Asn0765	COC1=CC=C(Cl)C=C1NC1=NC2=C(C=CC(C)=C2)C=C1C#N
Asn0766	OC1=CC=C2C=C(C3=NC4=C(CCC5=CC=CC=C45)S3)C(=O)OC2=C1
Asn0767	CC1=CC=C(C=C1)N(CC(=O)N1CCOCC1)S(C)(=O)=O
Asn0768	CC1=CC=C(C=C1)S(=O)(=O)NC1=CC(=CC=C1)C(F)(F)F
Asn0769	COCCCNC(=O)CN(C1=CC=C(OC)C=C1)S(=O)(=O)C1=CC=C(NC(C)=O)C=C1
Asn0770	CC(O)CNC1=NC2=C(N1CC1=CC=CC(Br)=C1)C(=O)N(C)C(=O)N2C
Asn0771	CN1N=CC2=C1N=CN=C2NC1=C(C)C=CC=C1
Asn0772	COC1=CC=C(NC2=NC=NC3=C2C=NN3C)C=C1
Asn0773	COC1=CC=C(NC2=NC=NC3=C2C=NN3C2=CC=CC=C2)C=C1
Asn0774	CN1N=CC2=C1N=CN=C2NC1=CC=C(C)C=C1C
Asn0775	CN1N=CC2=C1N=CN=C2NC1=CC=C(C=C1)C1=CC=CC=C1
Asn0776	CN1N=CC2=C1N=CN=C2NC1=CC=C2C=CC=CC2=C1
Asn0777	CN1N=CC2=C1N=CN=C2NC1=CC=CC2=CC=CC=C12
Asn0778	CN1N=CC2=C1N=CN=C2NC1=CC=C(C=C1)C(O)=O
Asn0779	OC(=O)C1=CC=C(NC2=NC=NC3=C2C=NN3CC2=CC=CC=C2)C=C1
Asn0780	CN1N=CC2=C1N=CN=C2NC1=CC(=CC=C1)C(O)=O
Asn0781	COC1=CC=CC=C1NC1=C(C(N)=O)C(C)=CC(C)=N1
Asn0782	CC1=NC(NC2=CC(Cl)=C(Cl)C=C2)=C(C(N)=O)C(C)=C1
Asn0783	CN(C)C(=O)COC1=C2C(OC(=O)C=C2C2=CC=CC=C2)=CC(C)=C1
Asn0784	CC1=CC2=C(C=C1)N=C(NC1=CC(=CC=C1)C(F)(F)F)C(=C2)C#N
Asn0785	CCOC1=CC2=C(C=C1)N=C(NC1=CC=C(F)C=C1)C(=C2)C#N
Asn0786	COC(=O)C1=CC=C(NC(=O)CC2N(CC3=CC=C(OC)C=C3)C(=S)N(C)C2=O)C=C1
Asn0787	O=C(CC1=CC=CS1)NC1=NC2=C(S1)C=CC=C2
Asn0788	CC(OC1=CC=CC=C1)C(=O)NC1=CC=CC(F)=C1
Asn0789	CCOC(=O)C1=C(C)OC2=CC=C(OCC(N)=O)C=C12
Asn0790	CCCNC1=NC2=C(N1CCC1=CC=CC=C1)C(=O)N(C)C(=O)N2C
Asn0791	CC1=C(SC(NC(=O)C2=CC=CO2)=C1C#N)C(=O)NC1=C(C)C(C)=CC=C1
Asn0792	COC(=O)C1=C(NC(=O)C2=CC=CO2)SC(C(=O)N2CCCC2)=C1C
Asn0793	COC(=O)CN1C(CC(=O)NC2=CC=C(OC)C=C2)C(=O)N(CC2=CC=CC=C2)C1=S
Asn0794	CCOC1=CC=C(NC2=NC3=C(C=CC=C3C)C=C2C#N)C=C1
Asn0795	COC1=CC=C(Cl)C=C1NC1=NC2=C(C=CC=C2C)C=C1C#N
Asn0796	COC1=CC=C(NC2=NC3=C(C=C(C)C=C3C)C=C2C#N)C(OC)=C1
Asn0797	CCC1=CC2=C(C=C1)N=C(NC1=C(OC)C=C(OC)C=C1)C(=C2)C#N
Asn0798	CC1=C2C=CC=CC2=C(NC2=CC=C(C=C2)S(=O)(=O)NC2=NC=CS2)N=N1
Asn0799	CC1=C(C=C(C=C1)C1=C2C=CC=CC2=C(NC2=CC=C(C=C2)S(N)(=O)=O)N=N1)S(N)(=O)=O
Asn0800	CC1=C(C=C(C=C1)C1=C2C=CC=CC2=C(NC2=CC=C(C=C2)C(N)=O)N=N1)S(N)(=O)=O
Asn0801	CCOC1=CC=C(C=C1)N1C(=O)CC(=O)NC1=O
Asn0802	ClC1=CC=C(NC(=O)C2=CC=NC=C2)C=C1
Asn0803	OC(=O)CCSC1=NC(=O)C2=CC=CC=C2N1
Asn0804	CC12CCCCN1CCCC1=C2NC2=C1C=CC=C2
Asn0805	CC1=CC(NC2=CC(=CC=C2)[N+]([O-])=O)=NC(SCC2=C(Cl)C=CC=C2Cl)=N1
Asn0806	OC(=O)CNC(=O)C1=CC2=C(OCCO2)C=C1
Asn0807	CC1=CC=CC(NC2=NC3=C(C=C(Cl)C=C3)C(=N2)C2=CC=CC=C2)=C1
Asn0808	O=C(NC1=CC2=NN(N=C2C=C1)C1=CC=CC=C1)C1=CC=CS1
Asn0809	CNS(=O)(=O)C1=CC(=CC=C1C)C1=NN=C(NC2=CC=C(C=C2)S(N)(=O)=O)C2=C1C=CC=C2
Asn0810	CN(C)C(=O)C1=CC=C(C=C1)C1=NN=C(NC2=C(O)C=CC=C2)C2=C1C=CC=C2
Asn0811	O=C1CCCC2=C1C(NC1=C2C2=C(C=C1)N=CC=C2)C1=CC=CS1
Asn0812	CC1=C(SC=C1)C1NC2=C(C3=C1C(=O)CCC3)C1=C(C=C2)N=CC=C1
Asn0813	ClC1=CC(CC2=CN=C(NC(=O)C3=CC=CS3)S2)=C(Cl)C=C1
Asn0814	O=C(CSC1=NC2=CC=CC=C2C(=O)N1CC1=CC=CO1)NCC1=CC=CC=C1
Asn0815	CCOC(=O)C1=C(NC(=O)CSC2=NC(N)=C(C=N2)C(=O)OCC)C=CC=C1
Asn0816	CC1=CC=CC=C1N1OC2C(C1C1=NC=CC=C1)C(=O)N(C2=O)C1=CC=C(F)C=C1
Asn0817	COC1=CC=C(C=C1)C1=NC(SCC(N)=O)=NC(=C1)C(F)(F)F
Asn0818	CCOC(=O)CC(=O)CSC1=NN=C2C(NC3=C2C=CC=C3)=N1
Asn0819	COC1=CC=C(NC2=NN=C(C3=CC=C(C=C3)C(N)=O)C3=C2C=CC=C3)C=C1
Asn0820	CNC(=O)C1=CC=C(NC2=NN=C(C3=CC=C(C=C3)C(N)=O)C3=C2C=CC=C3)C=C1
Asn0821	NC(=O)C1=CC=C(C=C1)C1=NN=C(NC2=CC=C(C=C2)C(=O)N2CCCCC2)C2=C1C=CC=C2
Asn0822	CCN(CC)C(=O)C1=CC=C(C=C1)C1=NN=C(NC2=CC=C(O)C=C2)C2=C1C=CC=C2
Asn0823	CCN(CC)C(=O)C1=CC=C(C=C1)C1=NN=C(NC2=CC=C(C=C2)S(N)(=O)=O)C2=C1C=CC=C2
Asn0824	CCN(CC)C(=O)C1=CC=C(C=C1)C1=NN=C(NC2=CC=C(C=C2)C(=O)NC)C2=C1C=CC=C2
Asn0825	CCN(CC)C(=O)C1=CC=C(C=C1)C1=NN=C(NC2=CC=C(C=C2)C(=O)N(C)C)C2=C1C=CC=C2
Asn0826	CCN(CC)C(=O)C1=CC=C(C=C1)C1=NN=C(NC2=CC=CC(O)=C2)C2=C1C=CC=C2
Asn0827	CN1C2=C(N(CC3=CC=CC=C3)C(NC3CCCCC3)=N2)C(=O)N(C)C1=O
Asn0828	COC1=C(NC2=NC(=NC3=CC=CC=C23)C2=CC=CN=C2)C=CC=C1
Asn0829	COC1=CC=C(NC2=NC(=NC3=C2C=CC=C3)C2=CN=CC=C2)C=C1
Asn0830	C(NC1=NC(=NC2=CC=CC=C12)C1=CC=CN=C1)C1=CC=CO1
Asn0831	CC(C)CC(=O)NC1=NC2=CC=C(C=C2S1)S(C)(=O)=O
Asn0832	COC1=CC=C(C=C1)S(=O)(=O)N1CCN(CC2=CC=C(Cl)C=C2)CC1
Asn0833	CCCOC(=O)C1=CC=C(OCC(O)CN2C(=O)NC(C)(C)C2=O)C=C1
Asn0834	CC1=CC=NN1CCC(O)=O
Asn0835	O=C(N1CCN(CC1)S(=O)(=O)C1=CC2=C(C=CC=C2)C=C1)C1=CC=NC=C1
Asn0836	CCOC(=O)C1=C(NC(=O)C2=NN3C(CC(C)NC3=N2)C(F)F)SC2=C1CCCC2
Asn0837	FC(F)(F)C1=NC(SCC(=O)NC2=CC=C3CCCC3=C2)=NC(=C1)C1=CC=CO1
Asn0838	CCOC(=O)CCSC1=NC(=CC(=N1)C(F)(F)F)C1=CC=CC=C1
Asn0839	CC1=C(C=C(C=C1)C1=NN=C(NC2=CC=C(O)C=C2)C2=C1C=CC=C2)S(=O)(=O)N1CCOCC1
Asn0840	CC1=C(C=C(C=C1)C1=NN=C(NC2=CC=CC(O)=C2)C2=C1C=CC=C2)S(=O)(=O)N1CCOCC1
Asn0841	CC1=C(C=C(C=C1)C1=NN=C(NC2=CC=C(O)C=C2)C2=C1C=CC=C2)S(=O)(=O)NCCO
Asn0842	COC(=O)C1=CC=C(NC2=NN=C(C3=CC(=C(C)C=C3)S(=O)(=O)NCCO)C3=C2C=CC=C3)C=C1
Asn0843	COC1=CC=C(NC2=NN=C(C3=CC(=C(C)C=C3)S(=O)(=O)NCCO)C3=C2C=CC=C3)C=C1
Asn0844	CNC(=O)C1=CC=C(NC2=NN=C(C3=CC(=C(C)C=C3)S(=O)(=O)NCCO)C3=C2C=CC=C3)C=C1
Asn0845	CC1=C(C=C(C=C1)C1=NN=C(NC2=CC=CC(O)=C2)C2=C1C=CC=C2)S(=O)(=O)NCCO
Asn0846	NC(=O)COC1=CC=C(NC2=NN=C(C3=CC=CC=C3)C3=C2C=CC=C3)C=C1
Asn0847	CNC(=O)COC1=CC=C(NC2=NN=C(C3=CC=CC=C3)C3=C2C=CC=C3)C=C1
Asn0848	CC1=CC=C(C=C1)C1=NN=C(NC2=CC=C(OCC(N)=O)C=C2)C2=C1C=CC=C2
Asn0849	CNC(=O)COC1=CC=C(NC2=NN=C(C3=CC=C(C)C=C3)C3=C2C=CC=C3)C=C1
Asn0850	COC1=CC=C(C=C1)C1=NN=C(NC2=CC=C(OCC(N)=O)C=C2)C2=C1C=CC=C2
Asn0851	CNC(=O)COC1=CC=C(NC2=NN=C(C3=CC=C(OC)C=C3)C3=C2C=CC=C3)C=C1
Asn0852	CC1=C(C=C(C=C1)C1=NN=C(NC2=CC=C(OCC(N)=O)C=C2)C2=C1C=CC=C2)S(N)(=O)=O
Asn0853	CNC(=O)COC1=CC=C(NC2=NN=C(C3=CC(=C(C)C=C3)S(N)(=O)=O)C3=C2C=CC=C3)C=C1
Asn0854	CNS(=O)(=O)C1=C(C)C=CC(=C1)C1=NN=C(NC2=CC=C(OCC(N)=O)C=C2)C2=C1C=CC=C2
Asn0855	CNC(=O)COC1=CC=C(NC2=NN=C(C3=CC(=C(C)C=C3)S(=O)(=O)NC)C3=C2C=CC=C3)C=C1
Asn0856	CN(C)S(=O)(=O)C1=C(C)C=CC(=C1)C1=NN=C(NC2=CC=C(OCC(N)=O)C=C2)C2=C1C=CC=C2
Asn0857	COC1=CC=C(NC2=NN=C(C3=CC=CC=C3)C3=C2C=CC=C3)C=C1C(N)=O
Asn0858	COC1=CC=C(NC2=NN=C(C3=CC=C(C)C=C3)C3=C2C=CC=C3)C=C1C(N)=O
Asn0859	COC1=CC=C(NC2=NN=C(C3=CC(=C(C)C=C3)S(N)(=O)=O)C3=C2C=CC=C3)C=C1C(N)=O
Asn0860	COC1=CC=C(NC2=NN=C(C3=CC(=C(C)C=C3)S(=O)(=O)N(C)C)C3=C2C=CC=C3)C=C1C(N)=O
Asn0861	CC(C)CCOC1=CC=C(C=C1)C(O)=O
Asn0862	COC1=CC=CC=C1C(=O)N1CCC(CC2=CC=CC=C2)CC1
Asn0863	O=C(NC1=CC=C(NC2=CC=CC=C2)C=C1)C1=CC=CO1
Asn0864	COC1=CC(=CC(OC)=C1)C(=O)NC1CC(C)(C)NC(C)(C)C1
Asn0865	O=C(NC1=CC=C(NC2=CC=CC=C2)C=C1)C1=CC=CS1
Asn0866	COC1=CC=C(Cl)C=C1NC1=C(C(N)=O)C(C)=CC(C)=N1
Asn0867	NC1=CC=C(Cl)C(NC(=O)C2=CC=CS2)=C1
Asn0868	CC1=CC(NC(=O)CSC2=NC(C)=CC(C)=N2)=NO1
Asn0869	COC(=O)C1=C(NC(C)=O)C2=C(O1)C=CC(Cl)=C2
Asn0870	[O-][N+](=O)C1=CC=C(NC2=CC=CC=C2)N=C1
Asn0871	CC1=CC=C(NC2=NC=C(C=C2)[N+]([O-])=O)C=C1Cl
Asn0872	OC1=CC(NC2=CC=C(C=N2)[N+]([O-])=O)=CC=C1
Asn0873	COC(=O)C1=CC=CC(NC2=NC=C(C=C2)[N+]([O-])=O)=C1
Asn0874	COC1=CC=C(NC2=NC=C(C=C2)[N+]([O-])=O)C=N1
Asn0875	[O-][N+](=O)C1=CC=C(NC2=C3C=CC=CC3=CC=C2)N=C1
Asn0876	[O-][N+](=O)C1=CN=C(NC2=CC=C(F)C=C2)C=C1
Asn0877	OC(=O)C1=CC(NC2=CC=C(C=N2)[N+]([O-])=O)=CC=C1
Asn0878	[O-][N+](=O)C1=CN=C(NC2=CC3=C(OCO3)C=C2)C=C1
Asn0879	[O-][N+](=O)C1=CN=C(NC2=CC=CC=C2F)C=C1
Asn0880	CC(=O)NC1=CC=C(NC2=NC=C(C=C2)[N+]([O-])=O)C=C1
Asn0881	COC(=O)CSC1=NC2=C(N1CCC(C)C)C(=O)NC(=O)N2C
Asn0882	CC1=CC2=NC(=CN2C=C1)C1=CC=C(C=C1)S(=O)(=O)N1CCOCC1
Asn0883	OC1=CC=C(NC2=NC=NC3=CC=CC=C23)C=C1
Asn0884	CCOC(=O)C1=CC=CC(NC2=NC=NC3=CC=CC=C23)=C1
Asn0885	C(CC1=CC=CC=C1)NC1=NC=NC2=CC=CC=C12
Asn0886	COC1=C(C=CC=C1)\N=C1/OC2=CC(O)=CC=C2C=C1C(=O)NCC1CCCO1
Asn0887	COC1=CC=C(C=C1OC)C(=O)OC1=CC=CN=C1
Asn0888	CN(C)CCCOC(=O)C1=CC2=C(O1)C=CC=C2
Asn0889	CC1=C(C)C2=C(S1)N=C(SCC=C)N=C2N
Asn0890	O=S(=O)(N1CCC2=CC=CC=C2C1)C1=CC=CS1
Asn0891	CC1=CC=C(NC2=NC3=CC=CC=C3C(=N2)N2CCOCC2)C=C1
Asn0892	CC1=CC=CC(NC2=NC3=CC=CC=C3C(=N2)N2CCOCC2)=C1
Asn0893	S1C=C(C2=C1N=CN1N=NN=C21)C1=CC=CC=C1
Asn0894	CC1=C(N)C=CC2=C1N=C(N2)C1=CC=C(N)C=C1
Asn0895	CN1C=NN=C1SCC(=O)NC1=CC=C(F)C=C1
Asn0896	COC1=CC(=CC(OC)=C1OC)C(=O)N1CCN(CC1)C1=CC=CC=N1
Asn0897	COC(=O)C1=CC=C2N=C(C)C=C(NC3=CC=CC(O)=C3)C2=C1
Asn0898	COC(=O)C1=CC=C2N=C(C)C=C(NC3=CC=C(O)C=C3)C2=C1
Asn0899	CCOC(=O)C1=C(NC2=CC=C3OCCOC3=C2)C2=CC(=CC=C2N=C1)C(=O)OC
Asn0900	CCOC(=O)C1=C(NC2=CC=C(C=C2)C(O)=O)C2=CC(=CC=C2N=C1)C(=O)OC
Asn0901	CCOC(=O)C1=C(NC2=CC(O)=CC=C2)C2=CC(=CC=C2N=C1)C(=O)OC
Asn0902	CCOC(=O)C1=C(NC2=CC=C(O)C=C2)C2=CC(=CC=C2N=C1)C(=O)OC
Asn0903	CC(=O)OC1=CC=CC(NC2=NC=NC3=CC=CC=C23)=C1
Asn0904	CC(C)(C)C(=O)OC1=CC=CC(NC2=NC=NC3=CC=CC=C23)=C1
Asn0905	COC1=CC(=CC(OC)=C1OC)C(=O)OC1=CC=CC(NC2=NC=NC3=CC=CC=C23)=C1
Asn0906	O=C(OC1=CC=CC(NC2=NC=NC3=CC=CC=C23)=C1)C1=CN=CC=C1
Asn0907	COCC1=C(C#N)C(NC2=CC=CC(=C2)C(F)(F)F)=NC(C)=C1[N+]([O-])=O
Asn0908	COC1=CC=C(C=C1)C1=CSC(NCC2=CC=CO2)=N1
Asn0909	CC1=C(C=CC=C1)C1=NN=C(O1)SCC1=CC=C(F)C=C1
Asn0910	CS(=O)(=O)C1=CC=C2N=C(NC(=O)C3CCCCC3)SC2=C1
Asn0911	[O-][N+](=O)C1=CC=C(O1)C(=O)NC1=CC=CC(NC(=O)C2=CC=CS2)=C1
Asn0912	COC1=CC(OC)=C(NC(=O)C2=CC=CC=C2NC(=O)C2=CC=CO2)C=C1
Asn0913	CCOC(=O)CCS(=O)(=O)C1=NC(=CC(=N1)C1=CC=CC=C1)C(F)(F)F
Asn0914	COC1=CC2=C(C=C1OC)C(C)N(CC2)C(=O)C1=NN2C(CC(NC2=C1)C1=CC=CO1)C(F)(F)F
Asn0915	CC1=NC(NC2=CC=C(C=C2)C2=CC=CC=C2)=C(C(N)=O)C(C)=C1
Asn0916	COC1=CC(NC2=C(C(N)=O)C(C)=CC(C)=N2)=CC=C1
Asn0917	COC1=CC(NC2=NC=NC3=CC=C(Br)C=C23)=CC=C1
Asn0918	COC1=CC=C(NC2=NC=NC3=CC=C(Br)C=C23)C(OC)=C1
Asn0919	COC1=CC=C(OC)C(NC2=NC=NC3=CC=C(Br)C=C23)=C1
Asn0920	CC(=O)C1=CC=C(NC2=NC=NC3=CC=C(Br)C=C23)C=C1
Asn0921	CCOC(=O)C1=C(NC2=CC=C(C=C2)C(C)=O)C2=CC(=CC=C2N=C1)C(=O)OC
Asn0922	CCOC(=O)C1=C(NC2=CC=C(NC(C)=O)C=C2)C2=CC(=CC=C2N=C1)C(=O)OC
Asn0923	CCOC(=O)C1=CC=C2N=CC(C(=O)OCC)=C(NC3=CC=C(NC(C)=O)C=C3)C2=C1
Asn0924	CCN1C(SCC(=O)NC2=CC=C3OCOC3=C2)=NC2=C1C(=O)N(C)C(=O)N2C
Asn0925	CCOC(=O)CN(C(=O)CSC1=NN=C(COC2=CC=C(OC)C=C2)N1CC)C1=CC=CC=C1
Asn0926	C(SC1=NN=C(O1)C1=CC=NC=C1)C1=CC=CC=C1
Asn0927	CCOC(=O)C1=C(C)N=C2N1C=CC1=C2C=CC=C1
Asn0928	CN1C(SC2=NC3=C(C=CC=C3)N2CC(=O)N2CCCCC2)=NC2=C1C(=O)N(C)C(=O)N2C
Asn0929	CN1C(SCC(=O)NCC2=CC=CS2)=NN=C1C1=CC=CO1
Asn0930	CC(=O)C1=CC=CC(NC(=O)C2=CC=CO2)=C1
Asn0931	CC1=CC=C(C=C1)S(=O)(=O)N(CC(=O)N1CCC(CC1)C(N)=O)CC1=CC=C(F)C=C1
Asn0932	CC(C)SC1=NC2=C(N1CC1=CC=C(Cl)C=C1)C(=O)N(C)C(=O)N2C
Asn0933	CC1=NN=C(NC2=CC=C(F)C=C2)C2=C1C=CC=C2
Asn0934	CC1=NN=C(NC2=CC=C3OCOC3=C2)C2=C1C=CC=C2
Asn0935	COC1=CC=C(C=C1)C1=NN=C(NC2=CC=C3OCOC3=C2)C2=C1C=CC=C2
Asn0936	CC1=CC=C(C=C1S(=O)(=O)NCCO)C1=NN=C(NC2=CC=C(F)C=C2)C2=C1C=CC=C2
Asn0937	CC1=CC=C(C=C1S(=O)(=O)NCCO)C1=NN=C(NC2=CC3=C(OCO3)C=C2)C2=C1C=CC=C2
Asn0938	CCOC(=O)C1=C(NC(=O)C2=CC=CO2)SC(C(=O)N2CCCC2)=C1C
Asn0939	CC1=CC2=C(NC3=CC=CC=C3)C=C(C)N=C2C=C1
Asn0940	CSCCC(N1C(=O)C2=C(C=C(C=C2)C(O)=O)C1=O)C(O)=O
Asn0941	COC1=CC=C(CCNC(=O)CSC2=NC(O)=CC(=O)N2)C=C1OC
Asn0942	CCC1=CC=C2NC(=O)C(=CC2=C1)C(N1CCN(CC1)C1=CC=C(F)C=C1)C1=NN=NN1CCOC
Asn0943	COC1=C(OC)C=C(C(O)=O)C(NC2=CC=NC3=CC(Cl)=CC=C23)=C1
Asn0944	COC1=CC(=CC=C1)C(=O)NC1=C(C(N)=O)C2=C(CCCC2)S1
Asn0945	COC1=CC(=CC(OC)=C1)C(=O)NC1=C(C(N)=O)C2=C(CCCC2)S1
Asn0946	CCOC1=CC=C(NC2=NC=CC=C2C(O)=O)C=C1
Asn0947	CC1=CC=C(NC2=NC=CC=C2C(O)=O)C(C)=C1
Asn0948	CC1=C(C)C(NC2=NC=CC=C2C(O)=O)=CC=C1
Asn0949	CC(=O)NC1=CC=C(NC(=O)CSC2=NN=NN2C2=CC=C(F)C=C2)C=C1
Asn0950	CC1=NC(NC2=CC=C(OC3=CC=CC=C3)C=C2)=C(C(N)=O)C(C)=C1
Asn0951	CCOC(=O)C1=CC=C(NC2=C(C#N)C(C)=CC(C)=N2)C=C1
Asn0952	COC1=CC=C(NC2=C(C#N)C(C)=CC(C)=N2)C(OC)=C1
Asn0953	COC1=CC=C(NC2=C(C(N)=O)C(C)=CC(C)=N2)C(OC)=C1
Asn0954	CC1=C(C)C2=C(S1)N=CN=C2NC1=CC=C2OCOC2=C1
Asn0955	OC1(CC(=O)C2=CC=C(Cl)C=C2)C(=O)N(CC=C)C2=C1C=CC=C2
Asn0956	CCOC(=O)N1CCN(CC1)C1=NC(=CS1)C1=CC=C(F)C=C1
Asn0957	CCOC(=O)N1CCN(CC1)C(=O)C(C)N(C1=CC=C(OC2=CC=CC=C2)C=C1)S(C)(=O)=O
Asn0958	COC1=CC=CC(NC(=O)NC2=NN=C(S2)C2=CC=NC=C2)=C1
Asn0959	CC1=CC(C2=CSC(NC3=NC=CC=N3)=N2)=C(C)C=C1
Asn0960	OC(=O)C1=CC(NC2=NC(=CS2)C2=C(O)C=C(O)C=C2)=CC=C1
Asn0961	ClC1=CC=C(NC2=NC=CC=C2C(=O)NCC2=CC=CC=C2)C=C1
Asn0962	FC(F)(F)C1=CC(NC2=NC=CC=C2C(=O)NCC2=CC=CC=C2)=CC=C1
Asn0963	FC(F)(F)C1=CC(NC2=NC=CC=C2C(=O)NCCC2=CC=CC=C2)=CC=C1
Asn0964	ClC1=CC=CC=C1NC1=NC=CC=C1C(=O)NCCC1=CC=CC=C1
Asn0965	FC1=CC=C(NC2=NC=CC=C2C(=O)NC2CCCCC2)C=C1
Asn0966	FC1=C(NC2=NC=CC=C2C(=O)NC2CCCCC2)C=CC=C1
Asn0967	FC1=C(NC2=NC=CC=C2C(=O)NCC2=CC=CC=C2)C=CC=C1
Asn0968	COC1=CC=C(CCN2C(=O)C3=C(C=CC=C3)N=C2C2=CC=CO2)C=C1OC
Asn0969	CC1=C(NC2=NC=NC3=C2C2=C(CCCC2)S3)C=CC=C1
Asn0970	ClC1=C(Cl)C=C(NC2=NC=NC3=C2C2=C(CCCC2)S3)C=C1
Asn0971	OC1=CC=C(NC2=NC=NC3=C2C2=C(CCCC2)S3)C=C1
Asn0972	CC(=O)NC1=CC=C(NC2=NC=NC3=C2C2=C(CCCC2)S3)C=C1
Asn0973	FC1=CC=C(NC2=NC=NC3=C2C2=C(CCC2)S3)C=C1
Asn0974	COC1=CC=C(NC2=NC=NC3=C2C2=C(CCC2)S3)C=C1
Asn0975	COC1=CC=CC=C1NC1=NC=NC2=C1C1=C(CCC1)S2
Asn0976	FC1=CC=CC=C1NC1=NC=NC2=C1C1=C(CCC1)S2
Asn0977	CC1=C(C)C2=C(S1)N=CN=C2NC1=CC=C(F)C=C1
Asn0978	CC1=C(C)C2=C(S1)N=CN=C2NC1=CC=CC=C1F
Asn0979	OC1=CC(NC2=NC3=CC=CC=C3C(=N2)N2CCOCC2)=CC=C1
Asn0980	COC1=CC=C(NC2=NC3=CC=CC=C3C(NCC3CCCO3)=N2)C=C1
Asn0981	COC(=O)C1=CC(OC)=C(OC)C=C1N1C=NC2=C(C=C(OC)C(OC)=C2)C1=O
Asn0982	CC1=CC=C(C=C1S(=O)(=O)NC(C)(C)CO)C1=C2C=CC=CC2=C(NC2=CC=C(O)C=C2)N=N1
Asn0983	CC1=CC=C(C=C1S(=O)(=O)NC(C)(C)CO)C1=C2C=CC=CC2=C(NC2=CC(O)=CC=C2)N=N1
Asn0984	CNC(=O)C1=CC(NC2=C3C=CC=CC3=C(C)N=N2)=CC=C1OC
Asn0985	CNC(=O)C1=CC(NC2=C3C=CC=CC3=C(N=N2)C2=CC=C(C)C=C2)=CC=C1OC
Asn0986	CNC(=O)C1=CC(NC2=C3C=CC=CC3=C(N=N2)C2=CC=C(C)C(=C2)S(N)(=O)=O)=CC=C1OC
Asn0987	CNC(=O)C1=CC(NC2=C3C=CC=CC3=C(N=N2)C2=CC=C(C)C(=C2)S(=O)(=O)NC)=CC=C1OC
Asn0988	CC(=O)NC1=CC=C(NC2=C3C=CC=CC3=C(N=N2)C2=CC=C(C)C(=C2)S(N)(=O)=O)C=C1
Asn0989	CNS(=O)(=O)C1=CC(=CC=C1C)C1=C2C=CC=CC2=C(NC2=CC=C(NC(C)=O)C=C2)N=N1
Asn0990	CC(=O)NC1=CC=C(NC2=C3C=CC=CC3=C(N=N2)C2=CC=C(C)C(=C2)S(=O)(=O)NCCO)C=C1
Asn0991	OC1=CC=C(NC2=C3C=CC=CC3=C(N=N2)C2=CC=C(O)C=C2)C=C1
Asn0992	CNC(=O)C1=CC=C(NC2=C3C=CC=CC3=C(N=N2)C2=CC=C(O)C=C2)C=C1
Asn0993	CCN(CC)C(=O)C1=CC=C(NC2=C3C=CC=CC3=C(N=N2)C2=CC=C(O)C=C2)C=C1
Asn0994	CNC(=O)C1=CC(NC2=C3C=CC=CC3=C(N=N2)C2=CC=C(O)C=C2)=CC=C1OC
Asn0995	CC1=CC=C(C=C1)C1=C2C=CC=CC2=C(NC2=CC=C(CC(N)=O)C=C2)N=N1
Asn0996	CNS(=O)(=O)C1=CC(=CC=C1C)C1=C2C=CC=CC2=C(NC2=CC=C(CC(N)=O)C=C2)N=N1
Asn0997	CCNS(=O)(=O)C1=CC(=CC=C1C)C1=C2C=CC=CC2=C(NC2=CC=C(CC(N)=O)C=C2)N=N1
Asn0998	CC(C)NS(=O)(=O)C1=CC(=CC=C1C)C1=C2C=CC=CC2=C(NC2=CC=C(CC(N)=O)C=C2)N=N1
Asn0999	CC1=CC=C(C=C1S(=O)(=O)NCCO)C1=C2C=CC=CC2=C(NC2=CC=C(CC(N)=O)C=C2)N=N1
Asn1000	ClC1=C(Cl)C=C(C=C1)C1=NC(=NO1)C1=NC=CC=C1
Asn1001	COCCCNC(=O)C1=CC2=C(N=C3N(C=CC=C3C)C2=O)N(CC=C)C1=N
Asn1002	COCCCN1C(=N)C(=CC2=C1N=C1N(C=CC=C1C)C2=O)C(=O)NCC1CCCO1
Asn1003	CC1=NC2=CC=CC=C2C(=C1)C(=O)OCC(=O)C1=CC=CS1
Asn1004	O=S(=O)(NC1=NC=CC=N1)C1=CC=C(NC2=NC=NC3=CC=CC=C23)C=C1
Asn1005	COC1=CC=C(OC)C(NC2=NC=NC3=CC=CC=C23)=C1
Asn1006	CC(C)OC(=O)C1=CC=C(NC2=NC=NC3=CC=CC=C23)C=C1
Asn1007	FC1=CC=C(NC2=NC=NC3=CC=CC=C23)C=C1
Asn1008	O=C(OC1=CC=C(NC2=NC=NC3=CC=CC=C23)C=C1)C1=CN=CC=C1
Asn1009	O=C(OC1=CC=C(NC2=NC=NC3=CC=CC=C23)C=C1)C1=CC=NC=C1
Asn1010	CCOC(=O)C1=C(NC2=CC(=CC=C2)C(O)=O)C2=CC(=CC=C2N=C1)C(=O)OC
Asn1011	COC1=CC(NC2=NC=NC3=C2C=NN3C2=CC=CC=C2)=CC(OC)=C1OC
Asn1012	COC1=CC(NC2=NC=NC3=C2C=NN3C2=CC=C(Cl)C=C2)=CC(OC)=C1OC
Asn1013	COC1=CC2=C(C=C1)C(Cl)=C(S2)C(=O)N(C)CC1=CC=CC=C1
Asn1014	CC1=C(C)C(NC2=NC(N3CCOCC3)=C(F)C=N2)=CC=C1
Asn1015	[O-][N+](=O)C1=CN=C(NC2=CC=CC(F)=C2)C=C1
Asn1016	CC1=CC=CC=C1NC1=NC=C(C=C1)[N+]([O-])=O
Asn1017	CC1=CC=CC(NC2=NC=C(C=C2)[N+]([O-])=O)=C1
Asn1018	CCOC1=CC(NC2=NC=C(C=C2)[N+]([O-])=O)=CC=C1
Asn1019	COC1=CC=C2C(CC3=C2N=C(NC(=O)C2=CC=CS2)S3)=C1
Asn1020	FC1=C(NC2=CC3=C(OCO3)C=C2)N=C(NC2=CC=C3OCOC3=C2)N=C1
Asn1021	CC(O)CCC1=NC2=C(N1)C=CC(=C2)C(O)=O
Asn1022	CN1C(=O)C2=C(SC3=C2CCC3)N=C1SCC#C
Asn1023	ClC1=CC=CC=C1NC(=O)NCC1=CC=CO1
Asn1024	ClC1=CC=CC(NC2=C(C=CC=N2)C(=O)NCC2=CC=CC=C2)=C1
Asn1025	ClC1=CC=CC(NC2=C(C=CC=N2)C(=O)NCCC2=CC=CC=C2)=C1
Asn1026	COC1=CC=C(NC2=NC(=NC3=CC=CC=C23)N2CCNCC2)C=C1
Asn1027	COC1=CC=C(NC2=NC(=NC3=CC=CC=C23)N2CCN(CC2)S(C)(=O)=O)C=C1
Asn1028	COC1=CC=C(CC2=NN=C3N2C=NC2=C3C=NN2C)C=C1
Asn1029	CC1=NN2C(NC3=C(CCCC3)C2=O)=C1
Asn1030	OCCN(CC(O)CN1C2=C(C=CC=C2)C2=C1C=CC=C2)S(=O)(=O)C1=CC=C(F)C=C1
Asn1031	O=C(NC1=CC=CC2=C1C=CC=C2)OC1CS(=O)(=O)C=C1
Asn1032	OC1=CC=C(NC2=C3C=CC=CC3=C(N=N2)C2=CC=C(OCC(=O)N3CCCCC3)C=C2)C=C1
Asn1033	COC1=C(C=C(NC2=NN=C(C)C3=C2C=CC=C3)C=C1)C(=O)N1CCCCC1
Asn1034	CCOC(=O)C1=C2C3=CC=CC=C3C(=O)C3=C2C(NC1=O)=CC=C3
Asn1035	CC(C)C(=O)NC1=C(C(N)=O)C2=C(CCCC2)S1
Asn1036	CC1=NC(NC2=CC=C(F)C=C2)=C(C(N)=O)C(C)=C1
Asn1037	O=C(NC1=NN=C(COC2=CC=CC=C2)S1)C1=CC=CS1
Asn1038	CC1=NN(CC(=O)NCCC2=CC=CC=C2)C(=O)C2=CC=CC=C12
Asn1039	CCOCCOC1=NC2=C(N1CC1=CC=C(C)C=C1)C(=O)N(C)C(=O)N2C
Asn1040	OC1=C2CCCC2=NC2=CC(=NN12)C1=CC=C(F)C=C1
Asn1041	NC(=O)COC1=CC=C(NC2=C3C=CC=CC3=C(N=N2)C2=CC=C(OCC#C)C=C2)C=C1
Asn1042	CCN(CC)C(=O)COC1=CC=C(C=C1)C1=NN=C(NC2=CC=C(OC)C(=C2)C(N)=O)C2=C1C=CC=C2
Asn1043	FC1=C(F)C(=CC=C1)C(=O)N1CCCC2=CC=CC=C12
Asn1044	ClC1=CC(C(=O)NCC2CCCO2)=C(NC(=O)C2=CC=CO2)C=C1
Asn1045	CCOC1=CC(=CC=C1)C(=O)C1=C(O)C(=O)N(CCN2CCOCC2)C1C1=CC=CN=C1
Asn1046	CCN(CC)CCNC(=O)C1=C(O)C2=C(NC1=O)C=C(OC)C(OC)=C2
Asn1047	CCOC(=O)COC1=CC=C(C=C1)S(=O)(=O)N1CCN(CC1)C1=CC=CC=C1F
Asn1048	CC1=CC(C)=NC(SCC(=O)C2=CC(C)=C(F)C=C2)=N1
Asn1049	O=C(COC1=CC=CC=C1)NC1=C(C(=O)NCC2=CN=CC=C2)C2=C(CCCC2)S1
Asn1050	CN1C(C)=NC2=C1C=CC(NC(=O)NC1=CC(F)=CC=C1)=C2
Asn1051	CC(=O)NC1=CC=C(NC2=NC=NC3=C2C=NN3CC2=CC=C(Cl)C=C2)C=C1
Asn1052	N#CC1=CC=C(CSC2=NN=C(O2)C2=CC=NC=C2)C=C1
Asn1053	[O-][N+](=O)C1=CC2=C(NC(=N2)C2=CC=CO2)C=C1
Asn1054	FC1=CC=C(C=C1)S(=O)(=O)N1CCCC1C(=O)NCC1=C(F)C=CC=C1
Asn1055	CC1=CC=C(C=C1)S(=O)(=O)N1CCCC1C(=O)NC1CCCCC1
Asn1056	COC(=O)C1=NOC(=C1)C1=CC=C(OC)C(OC)=C1
Asn1057	OC1(CC2=CC=NC=C2)C(=O)NC2=CC=CC=C12
Asn1058	[O-][N+](=O)C1=CN=C(NC2=CC3=C(C=CC=C3)C=C2)C=C1
Asn1059	COC1=CC2=C(C=C1OC)C(=O)OC(=N2)C1=CC=CS1
Asn1060	COC1=CC(NC(=O)C2CCCO2)=C(C=C1OC)C(O)=O
Asn1061	COC1=CC=C(C=C1OC)C(=O)N1CCN(CC1)C1=C(C)C=CC=C1C
Asn1062	CC1=NC(NC2=CC3=C(OCCO3)C=C2)=C(C#N)C(C)=C1
Asn1063	CC1=NC(NC2=CC3=C(OCCO3)C=C2)=C(C(N)=O)C(C)=C1
Asn1064	COC1=CC=C(NC2=C(C#N)C(C)=CC(C)=N2)C=C1OC
Asn1065	COC1=CC=C(NC2=C(C(N)=O)C(C)=CC(C)=N2)C=C1OC
Asn1066	CCC1=CC=C(NC2=C(C(N)=O)C(C)=CC(C)=N2)C=C1
Asn1067	COC(=O)C1C2OC3(CN(CC4=CC=CS4)C(=O)C13)C=C2
Asn1068	COC1=CC=C(OCC(=O)NC2=C(C(N)=O)C3=C(CCCC3)S2)C=C1
Asn1069	ClC1=CC=C(NC(=O)N2CCN(CC2)C2=NC=CC=N2)C=C1
Asn1070	CC1=CC=C(C=C1)S(=O)(=O)N1CCCC1C(=O)NC1=NC2=C(CCCC2)S1
Asn1071	CN1C(=O)N(CC2=C(F)C=CC=C2)C2=CC=CC=C2C1=O
Asn1072	COC1=CC(OC)=CC(NC2=CC(C)=NC3=NC=NN23)=C1
Asn1073	COC(=O)C1=CC=C(NC2=CC(C)=NC3=NC=NN23)C=C1
Asn1074	CCOCC(=O)NC1=NC2=C(S1)C=CC=C2
Asn1075	CN1C2=C3C=NC4=C(C=CC=C4)N3C(=C2C(=O)N(C)C1=O)C1=CC=CC=C1
Asn1076	COC(=O)C1=CN(N=C1C1=CC=CN=C1)C1=CC=CC=C1
Asn1077	COC1=CC=C(C=C1O)C1=NC2=CC=CC=C2S1
Asn1078	CN1N=C(C2=CC=C(C=C2)C(=O)NC2=CC=CN=C2)C2=C(C=CC=C2)C1=O
Asn1079	CN1CCN(CC1)S(=O)(=O)C1=CC(=CC=C1)S(=O)(=O)C1=CC=C(Cl)C(Cl)=C1
Asn1080	OC1=CC=CC=C1NC(=O)C1=C(Cl)C=C(Cl)C(=C1)S(=O)(=O)N1CCOCC1
Asn1081	[O-][N+](=O)C1=C(SC(Cl)=C1N1CCOCC1)S(=O)(=O)C=C
Asn1082	CCOC1=CC2=C3N(C(=O)C(=O)C3=C1)C(C)(C)C=C2C
Asn1083	CC1=NC2=NC=NN2C(=C1)N1CCN(CC1)C(C1=CC=CC=C1)C1=CC=CC=C1
Asn1084	NC1=NC(=NN1S(=O)(=O)C1=CC=CC=C1)C(=O)N1CCOCC1
Asn1085	CC1=CC(NC2=NC=NC3=CC=C(C=C23)[N+]([O-])=O)=C(O)C=C1
Asn1086	CNC(=O)C1=C(N=CN1)C(=O)NC1=CC=CC(OC)=C1
Asn1087	CC1=NC(NC2=CC=CC3=CC=CC=C23)=C(C(N)=O)C(C)=C1
Asn1088	CC1=CC=C(NC2=C(C(N)=O)C(C)=CC(C)=N2)C(C)=C1
Asn1089	CC1=NC(NC2=CC=CC(Cl)=C2C)=C(C(N)=O)C(C)=C1
Asn1090	COC1=CC(OC)=C(NC2=C3N=NN(CC4=C(Cl)C=CC=C4)C3=NC=N2)C=C1
Asn1091	CC(C)C1=C(OCC(=O)NC2=CC=C(C=C2)S(=O)(=O)NC2=NOC(C)=C2)C=CC=C1
Asn1092	O=C(COC(=O)C1=C(NC2=CC=CC=C2)C=CC=C1)NC1=CC=C2OCOC2=C1
Asn1093	COC1=CC=C(NC2=NC3=CC=CC=C3C(NCCO)=N2)C(OC)=C1
Asn1094	CCOC1=CC=C(NC2=NC3=CC=CC=C3C(N)=N2)C=C1
Asn1095	OC1=CC=CC=C1NC1=NC2=CC=CC=C2C(=N1)N1CCOCC1
Asn1096	C(N1CCN(CC1)C1=NC=NC2=C1OC1=C2C=CC=C1)C1=CC=C2OCOC2=C1
Asn1097	CC1=NC2=CC=CC=C2C(NC2=CC=CC=C2O)=C1
Asn1098	CCOC(=O)N1CCN(CC2=NC(=NO2)C2=CC=C(C)C=C2)CC1
Asn1099	CCCN1C(CN(C)CC2=CC=CC=C2)=NC2=C1C(=O)N(C)C(=O)N2C
Asn1100	CN1C2=C(N(CCC3=CC=CC=C3)C(SC3=NC4=C(N3)C=CC=C4)=N2)C(=O)NC1=O
Asn1101	O=C1OC2=C(C=CC=C2)N1CCN1C2=CC=CC=C2C2=NC3=C(C=CC=C3)N=C12
Asn1102	COCCOC(=O)C1=C(N)OC2=C(C1C1=CN=CC=C1)C(=O)CCC2
Asn1103	CCOC(=O)C(C#N)C(C1=C(C)NN=C1O)C1=CN=CC=C1
Asn1104	O=C(NC1=CC=C2C(OC3=C2C=CC=C3)=C1)C1=CC=C2OCOC2=C1
Asn1105	O=C(NC1=CC=CC=C1N1CCCC1)C1=CC=C2OCOC2=C1
Asn1106	O=C(NC1=CC=C(NC(=O)C2=CC=C3OCOC3=C2)C=C1)C1=CC=CS1
Asn1107	CN1CCN(CC1)S(=O)(=O)C1=CC=C(C)C(=C1)C1=NN=C2N1N=C(C)C1=C2C=CC=C1
Asn1108	COC1=C(OC)C(CNC2=NC3=CC=CC=C3N2CCN2CCCCC2)=CC=C1
Asn1109	COC(=O)C(CCSC)NC(=O)C1=CC2=C(CCCC2=O)N(C1=O)C1=CC=C(C)C=C1
Asn1110	CCOC1=CC=C(NC2=NC(CC(=O)OC)=CC(=O)N2)C=C1
Asn1111	CC1=NN=C2SC(=NN12)C1=CC=C(N)C=C1
Asn1112	CC1=C(NC(=O)C2CC3=CC=CC=C3C(=O)O2)C=CC=C1
Asn1113	COC1=CC(=CC=C1)N1CC23OC(C=C2)C(C3C1=O)C(O)=O
Asn1114	CCN1CCN(CC1)S(=O)(=O)C1=C(C)C=C(OC)C(C)=C1
Asn1115	CCOC(=O)C1=C(C)N(C)C2=CC=C(OCC(O)CN3C(C)=NC4=C3C=CC=C4)C=C12
Asn1116	CCSC1=C(C=CC=C1)C(=O)NC1=NOC(C)=C1
Asn1117	OCCN1CCN(CC1)C1=C2CCCCC2=C(C#N)C2=NC3=C(C=CC=C3)N12
Asn1118	NC(=O)C1=CC=C(NC2=NC=NC3=C2C2=C(CCCC2)S3)C=C1
Asn1119	COC1=CC=C(NC2=NC=NC3=C2C=NN3CC2=CC=C(C)C=C2)C=C1
Asn1120	CC1=CC(C)=C2C(SC3=C2N=CN=C3N2CCOCC2)=N1
Asn1121	O=C(N1CCCC1)N1CCN(CC1)C(=O)C1=CC=CO1
Asn1122	CCOC1=CC(=CC=C1)C(=O)NC1=C(C=CC=C1)N1CCN(CC1)C(=O)C(C)C
Asn1123	COC1=CC(NC(=O)C2=CC=C(COCC(F)(F)F)O2)=CC(OC)=C1OC
Asn1124	COC1=CC=C(NC2=NC3=CC=CC=C3N=C2NS(=O)(=O)C2=CC=C(Cl)C=C2)C=C1
Asn1125	CCOC(=O)C1=C(NC2=CC=C(NC(C)=O)C=C2)C2=CC(F)=CC=C2N=C1
Asn1126	COCC(=O)NC1=NC(=C(C)S1)C1=CC=CC=C1
Asn1127	CC1=NC(NC2=NC(=CS2)C2=CC=CC=C2)=CC=C1
Asn1128	CC(=O)NC1=CC=C(C=C1)C1=CSC(NC2=CC=CC=N2)=N1
Asn1129	N(C1=NC(=CS1)C1=CC=NC=C1)C1=CN=CC=C1
Asn1130	CC(=O)C1=C(O)C(=O)N(CCC2=CNC3=C2C=CC=C3)C1C1=CC=C(C)C=C1
Asn1131	CCC1=CC=C(C=C1)C1N(CCC2=CNC3=C2C=CC=C3)C(=O)C(O)=C1C(C)=O
Asn1132	COC1=CC(=CC=C1O)C1N(CCC2=CNC3=C2C=CC=C3)C(=O)C(O)=C1C(C)=O
Asn1133	CCOC1=CC=C(C=C1)C1N(CCC2=CNC3=C2C=CC=C3)C(=O)C(O)=C1C(C)=O
Asn1134	CC(=O)C1=C(O)C(=O)N(CCC2=CNC3=C2C=CC=C3)C1C1=CC=C(O)C=C1
Asn1135	O=C(NC1=CC=C(C=C1)S(=O)(=O)N1CCCC1)C1=CC=C(CN2CCOCC2)C=C1
Asn1136	CCOC1=C(OC(C)=O)C=CC(=C1)C1NC(=O)NC(C2=CC=CC=C2)=C1C(C)=O
Asn1137	O=C1OC2=CC=CC=C2N1CCC1=CC=CC=C1
Asn1138	O1N=C(N=C1C1=C2C=CC=CC2=CC=C1)C1=CC=NC=C1
Asn1139	CN1C(=O)N(C)C2=C1C=CC(=C2)S(=O)(=O)NCCC1=CC=CC=C1
Asn1140	CC1=CC(C)=NC(NC2=CC=C(C=C2)C(O)=O)=N1
Asn1141	CC1=CC(C)=NC(NC2=C(C=C(Br)C=C2)C(O)=O)=N1
Asn1142	CC1=CC(C)=NC(NCCO)=N1
Asn1143	CC1=CC(C)=NC(NC2=CC=C(F)C=C2)=N1
Asn1144	COC1=CC=C(NC2=NC(C)=CC(C)=N2)C=C1Cl
Asn1145	CC(=O)C1=CC=C(NC2=NC(C)=CC(C)=N2)C=C1
Asn1146	CC1=CC(C)=NC(NC2=CC=C(C=C2)S(N)(=O)=O)=N1
Asn1147	CC1=CC=C(C=C1)C1=CC(=NO1)C(=O)NCC1CCCO1
Asn1148	COC1=CC=C(CNC(=O)C2=C3N=C(C)C=C(C(F)F)N3N=C2)C=C1OC
Asn1149	CC1=CC(NC(=O)C2=C3N=C(C=C(C(F)F)N3N=C2)C2=CC=CC=C2)=NO1
Asn1150	COC1=CC=C(C=C1)C1=NC2=C(C=NN2C(=C1)C(F)F)C(=O)NCCCN1CCCC1=O
Asn1151	CC1CCN(CC1)C1=C(NC(=O)C2=CC=C(O2)[N+]([O-])=O)C=CC=C1
Asn1152	O=C(CSC1=NCCS1)NC1=CC=NC2=C1C=CC=C2
Asn1153	COCC1=NN=C(NC(=O)CSC2=CC=C(C)C=C2)S1
Asn1154	COC1=C(C=CC(SC)=C1)C(=O)NC1=NN=C(CCC2=CC=CC=C2)S1
Asn1155	COCCNC(=O)C1CN(C(=O)C1)C1=CC=C(C)C=C1
Asn1156	COCCSC1=NN=C(NC(=O)CC2=C(OC)C=CC=C2)S1
Asn1157	COC1=CC(NC(=O)C2=CC=C(CSC3=NC=NC4=C3N=CN4)C=C2)=C(OC)C=C1
Asn1158	CC(C)OC1=C(C=CC=C1)C1CC(=O)NC2=C1C=C1OCOC1=C2
Asn1159	COC1=CC(=CC(OC)=C1OC)C1CC(=O)NC2=CC=CC=C2S1
Asn1160	COC(=O)C1=CN(C=C(C1C1=CC2=C(OCO2)C=C1)C(=O)OC)C1CCCCC1
Asn1161	NC1=C(C(=O)NC(SCC(=O)N2CCC3=C2C=CC=C3)=N1)C1=CC=CC=C1
Asn1162	CC1=NN2C(NC3=C(C=C(C)C=C3C)C2=C1)C1=CC2=C(OCO2)C=C1
Asn1163	CC1=NN2C(NC3=C(C=CC=C3C)C2=C1)C1=CC2=C(OCO2)C=C1
Asn1164	O=C(OCC(=O)C1=CC=C(OC(=O)C2=CC=CO2)C=C1)C1CN(CC2=CC=CO2)C(=O)C1
Asn1165	CNC1=C(F)C=NC(=N1)N1CCC2=C1C=CC=C2
Asn1166	CC1=CC=C(C=C1)C(=O)N1CCN(C1)C(=O)CN1CCOCC1
Asn1167	CNC(=O)C1=CC=C(O1)C1=C(N)C2=C(S1)N=C(N1CCOCC1)C1=C2CC(C)(C)OC1
Asn1168	CCOC1=CC=C(OCC)C(NC(=O)CSC2=NN=C(O2)C2=CC=CN=C2)=C1
Asn1169	COC(=O)CC1=C(C)NC2=NC(NCC3=CC=C(Cl)C=C3)=NN2C1=O
Asn1170	COC1=CC=C(C=C1)C1=NOC(CCC(O)=O)=N1
Asn1171	CN1C(N)=NC=C1C1=CC=C(Cl)C=C1
Asn1172	COC1=CC(=CC(OC)=C1OC)C1=NOC(=N1)C1=CC=CC=C1C(=O)NCC1=CC=CO1
Asn1173	CC1=CC2=C(S1)N=CN=C2NC1=CC(F)=CC=C1
Asn1174	CC1CC(=O)C2=C(C1)N=C(NC1=CC=C(F)C=C1)N=C2C
Asn1175	COC1=CC=C(NC2=NC3=C(C(=O)CC(C)C3)C(C)=N2)C=C1
Asn1176	CC1CC(=O)C2=C(C1)N=C(NC1=CC=CC(C)=C1)N=C2C
Asn1177	CC1=NN=C(SCC(=O)NC2=NC=C3C(=O)CCCC3=N2)S1
Asn1178	NS(=O)(=O)C1=CC=C(N\C=C2/C(=O)NC3=CC=CC=C23)C=C1
Asn1179	COC1=CC=CC=C1NC1=NC=C2C(=O)CC(C)(C)CC2=N1
Asn1180	CC1=CC=C(NC2=NC(=CS2)C(=O)NCC2=CC=CO2)C=C1
Asn1181	COC1=CC=C(NC2=NC(=CS2)C(=O)N2CCC3=C(C2)C=C(OC)C(OC)=C3)C=C1
Asn1182	CC(=O)NCCC1=NC2=CC=CC=C2N1CCCCOC1=CC=CC=C1
Asn1183	CN1C(=O)N(C)C2=CC(NC3=NC4=CC=CC=C4N=C3N3N=C(C)C=C3C)=CC=C12
Asn1184	CCCC1=CC(=O)N2N=C(SCC3=CC=CC=C3)N=C2N1
Asn1185	CC1CC(=O)C2=CN=C(NC3=CC(C)=CC=C3)N=C2C1
Asn1186	CCC1=CC=C(NC2=NC=C3C(=O)CC(C)CC3=N2)C=C1
Asn1187	ClC1=CC=C(C=C1)C1=NOC(CN2CCCCC2)=N1
Asn1188	COC1=C(NC2=NC=C3C(=O)CC(CC3=N2)C2=CC=CC=C2)C=CC=C1
Asn1189	FC(F)(F)C1=CC(NC2=NC=C3C(=O)CC(CC3=N2)C2=CC=CO2)=CC=C1
Asn1190	CCOC(=O)C1=CN=C(NC2=CC=C(OCC)C=C2)N=C1C
Asn1191	CN1CCN(CC1)C1=NC(C)=C(CC2=CC=CC3=CC=CC=C23)C(=O)N1
Asn1192	COC1=CC=C(NC2=NC=C3C(=O)CC(CC3=N2)C2=CC=CO2)C=C1
Asn1193	COC1=CC(=CC=C1)C(=O)NC1=NC=C2C(=O)CC(C)CC2=N1
Asn1194	CC1=C(C)C2=C(N=CN=C2NC2=CC=CC=C2O)N1CC1=CC=CO1
Asn1195	CC1=C(C)C2=C(N=CN=C2NC2=CC(O)=CC=C2)N1CC1=CC=CO1
Asn1196	CC1=C(C)C2=C(N=CN=C2NC2=CC=C(O)C=C2)N1CC1=CC=CO1
Asn1197	OC(=O)C1=CC=CC(NC2=C3OC4=C(C=CC=C4)C3=NC=N2)=C1
Asn1198	O=C(NC1=C(C=CC=C1)C1=NC2=CC=CC=C2NC1=O)C1=CC=CS1
Asn1199	CCOC1=C(C=CC=C1OC)C1CC(=O)NC2=C1C=C(OC)C(OC)=C2
Asn1200	CCOC1=CC=C(C=C1)C1CC(=O)NC2=C1C(=O)CCC2
Asn1201	CN1C2=C(N3CCCN(CCC4=CC=CC=C4)C3=N2)C(=O)N(CC(C)=C)C1=O
Asn1202	CC1=CC(NC2=NC=C3C(=O)CC(CC3=N2)C2=CC=CO2)=CC=C1
Asn1203	CC1=CC=CC(NC2=C(F)C=NC(=N2)N2CCOCC2)=C1C
Asn1204	OC(=O)CC1=CC=C(C=C1)N1C=CC=C1
Asn1205	CC1=NN(C(C)=C1)C1=NC2=CC=CC=C2N=C1NC1=CC=C2OCOC2=C1
Asn1206	COC1=CC=C(NC2=CC(=NC=N2)N2CCCC2)C=C1
Asn1207	O=C1C=C(OC2=C3C=CC=CC3=CC=C12)C1=CC=NC=C1
Asn1208	CCC1=CC=C(NC(=O)CCN2C(=O)OC3=C2C=CC=C3)C=C1
Asn1209	COC1=C(OC)C=C(C=C1)C1=NN2C(S1)=NN=C2C1=CC=CC(C)=C1
Asn1210	COC1=CC=C(C=C1OC)C1=NN=C2SC(=NN12)C1=CC=CS1
Asn1211	C1CCN(C1)C1=NN=C(NC2=CC=CC=C2)C=C1
Asn1212	COC1=CC=CC=C1NC(=O)C1=CC(NC2=CC(F)=C(F)C=C2)=NC2=C1C=CC=C2
Asn1213	CN1C(CNC(=O)C2=CC=CO2)=NN=C1SCC(=O)NC1=CC=C(C)C=C1C
Asn1214	NC1=NC(NC2=CC=CC=C2)=C2C(=O)CCCC2=N1
Asn1215	CCSC1=C(C=CC=C1)C1=NC(=NO1)C1=CC=NC=C1
Asn1216	CC1(C)CC(=O)C2=C(NC3=CC=CC=C3)N=C(N)N=C2C1
Asn1217	CC1=C(NC2=CC=C(C=N2)[N+]([O-])=O)C=C2OCOC2=C1
Asn1218	CC1=CC=C(NC2=NC=C3C(=O)CC(CC3=N2)C2=CC=C(F)C=C2)C(C)=C1
Asn1219	COC1=CC=C(NC2=NC=C3C(=O)CC(CC3=N2)C2=CC=C(C)C=C2)C=C1
Asn1220	CC1=CC=C(NC2=NC=C3C(=O)CC(CC3=N2)C2=CC=CC=C2)C(C)=C1
Asn1221	COC1=CC=C(NC2=NC=C3C(=O)CC(CC3=N2)C2=CC=C(Cl)C=C2)C=C1
Asn1222	COC1=CC=C(NC2=NC=C3C(=O)CC(CC3=N2)C2=CC=C(F)C=C2)C=C1
Asn1223	COC1=CC=C(NC2=NC=C3C(=O)CC(CC3=N2)C2=CC=C(OC)C=C2)C=C1
Asn1224	FC1=CC=C(NC2=NC=C3C(=O)CC(CC3=N2)C2=CC=C(F)C=C2)C=C1
Asn1225	CC1=CC=C(C=C1)C1CC(=O)C2=CN=C(NC3=CC=C(F)C=C3)N=C2C1
Asn1226	CCC1=CC=C(NC2=NC=C3C(=O)CC(CC3=N2)C2=CC=C(OC)C=C2)C=C1
Asn1227	COC1=CC=C(NC2=NC=C3C(=O)CC(CC3=N2)C2=CC(Cl)=CC=C2)C=C1
Asn1228	CCC1=CC=C(NC2=NC=C3C(=O)CC(CC3=N2)C2=CC=CO2)C=C1
Asn1229	CCC1=CC=C(NC2=NC=C3C(=O)CC(CC3=N2)C2=CC=CS2)C=C1
Asn1230	COC1=CC=C(NC2=NC=C3C(=O)CC(CC3=N2)C2=CC=CS2)C=C1
Asn1231	[O-][N+](=O)C1=CC=CN=C1NC1=CC2=C(OCCO2)C=C1
Asn1232	CCOC(=O)C1=CC=C(NC2=NN=C(N3N=C(C)C=C3C)C3=CC=CC=C23)C=C1
Asn1233	CC1=C2N=CN(C2=NC(NC2=CC=C3OCCOC3=C2)=N1)C1=CC=C2OCCOC2=C1
Asn1234	COC1=CC=C(C=C1Cl)N1N=NC2=C(C)N=C(NC3=CC(Cl)=C(OC)C=C3)N=C12
Asn1235	CC1=C2N=NN(C2=NC(NC2=CC=CC=C2)=N1)C1=CC=CC=C1
Asn1236	CC1=C2N=CN(C2=NC(NC2=CC=C(F)C=C2)=N1)C1=CC=C(F)C=C1
Asn1237	COCCCN1C(=O)N(CC2=CC=CC(C)=C2)C2=C(SC=C2)C1=O
Asn1238	CC1=CC(C)=NC(NC2=CC=CC(=C2)C(O)=O)=N1
Asn1239	CCOC(=O)C1=C(NC2=CC=C(C=C2)S(N)(=O)=O)C2=CC=C(C=C2N=C1)C(F)(F)F
Asn1240	COC1=CC=C(C=C1)C(=O)NC1=C(C(N)=O)C2=C(CCCC2)S1
Asn1241	NC(=O)C1=C(NC(=O)COC2=CC=CC=C2)SC2=C1CCCC2
Asn1242	CCC1=CC=C(NC2=CC(=NC=N2)N2N=C(C)C=C2C)C=C1
Asn1243	CC1=NN(C(C)=C1)C1=CC(NC2=CC=C(C)C=C2)=NC=N1
Asn1244	CCC1=CC=C(NC2=NC(C)=C3N=C(O)C(=O)N(C4=CC=C(CC)C=C4)C3=N2)C=C1
Asn1245	CCOC(=O)C1=CN=C(NC2=CC(=CC=C2)C(F)(F)F)N=C1C
Asn1246	COC1=C(NC2=NC=CC=C2C(O)=O)C=CC=C1
Asn1247	FC1=CC=C(C=C1)C1=NC(=NO1)C1=CC=CS1
Asn1248	COC1=CC=C(CC(=O)NC2=CC=C(C=C2)C2=NOC(COC3=C(C)C=CC=C3)=N2)C=C1
Asn1249	CC(C)(C)C(=O)N1CCCC(C1)C1=NN(CCNC(=O)C2CC2)C2=C1C=CC=N2
Asn1250	FC1=CC=C(CC(=O)N2CCCC(C2)C2=NN(CCNC(=O)C3CC3)C3=C2C=CC=N3)C=C1
Asn1251	CC1=CC=C(CC(=O)N2CCCC(C2)C2=NN(CCNC(=O)C3CC3)C3=C2C=CC=N3)C=C1
Asn1252	CC(C(=O)N1CCCC(C1)C1=NN(CCNC(=O)C2CC2)C2=C1C=CC=N2)C1=CC=CC=C1
Asn1253	O=C(NCCN1N=C(C2CCCN(C2)C(=O)C2CCCC2)C2=C1N=CC=C2)C1CC1
Asn1254	O=C(CN1CCCC1)N1CCCC(C1)C1=NN(CCNC(=O)C2CC2)C2=C1C=CC=N2
Asn1255	O=C(NCCN1N=C(C2CCCN(C2)C(=O)C2CCC=CC2)C2=C1N=CC=C2)C1CC1
Asn1256	O=C(CC1CCCCO1)N1CCCC(C1)C1=NN(CCNC(=O)C2CC2)C2=C1C=CC=N2
Asn1257	COC1=CC(=CC=N1)C(=O)N1CCCC(C1)C1=NN(CCNC(=O)C2CC2)C2=C1C=CC=N2
Asn1258	CCC1=CC(=NO1)C(=O)N1CCCC(C1)C1=NN(CCNC(=O)C2CC2)C2=C1C=CC=N2
Asn1259	O=C(CC1CCCO1)N1CCCC(C1)C1=NN(CCNC(=O)C2CC2)C2=C1C=CC=N2
Asn1260	FC1=C(CN2CCCC(C2)C2=NN(CCNC(=O)C3CC3)C3=C2C=CC=N3)C=CC=C1
Asn1261	O=C(NCCN1N=C(C2CCCN(CC3=CC=NC=C3)C2)C2=C1N=CC=C2)C1CC1
Asn1262	FC1=CC=CC(CN2CCCC(C2)C2=NN(CCNC(=O)C3CC3)C3=C2C=CC=N3)=C1F
Asn1263	CC(=O)NCCN1N=C(C2CCCN(CC3CCCCC3)C2)C2=C1N=CC=C2
Asn1264	CC(=O)NCCN1N=C(C2CCCN(CC3=CC=C(F)C=C3)C2)C2=C1N=CC=C2
Asn1265	CC(=O)NCCN1N=C(C2CCCN(CC3=C(F)C=CC=C3)C2)C2=C1N=CC=C2
Asn1266	CC(=O)NCCN1N=C(C2CCCN(CC3=CC(F)=CC=C3)C2)C2=C1N=CC=C2
Asn1267	COC1=CC=CC=C1CN1CCCC(C1)C1=NN(CCNC(C)=O)C2=C1C=CC=N2
Asn1268	COC1=CC(CN2CCCC(C2)C2=NN(CCNC(C)=O)C3=C2C=CC=N3)=CC=C1
Asn1269	COC1=CC=C(CN2CCCC(C2)C2=NN(CCNC(C)=O)C3=C2C=CC=N3)C=C1
Asn1270	COC1=CC=CC(OC)=C1CN1CCCC(C1)C1=NN(CCNC(C)=O)C2=C1C=CC=N2
Asn1271	COC1=CC=C(CN2CCCC(C2)C2=NN(CCNC(C)=O)C3=C2C=CC=N3)C(OC)=C1
Asn1272	COC1=C(OC)C=C(CN2CCCC(C2)C2=NN(CCNC(C)=O)C3=C2C=CC=N3)C=C1
Asn1273	CC(=O)NCCN1N=C(C2CCCN(CC3=CN=CC=C3)C2)C2=C1N=CC=C2
Asn1274	CC(=O)NCCN1N=C(C2CCCN(CC3=CC=NC=C3)C2)C2=C1N=CC=C2
Asn1275	COC1=CC=C(OC)C(CN2CCCC(C2)C2=NN(CCNC(C)=O)C3=C2C=CC=N3)=C1
Asn1276	COC1=CC=CC(CN2CCCC(C2)C2=NN(CCNC(C)=O)C3=C2C=CC=N3)=C1OC
Asn1277	CC(=O)NCCN1N=C(C2CCCN(CC3=C(Cl)C(Cl)=CC=C3)C2)C2=C1N=CC=C2
Asn1278	CC(=O)NCCN1N=C(C2CCCN(CC3=CC(F)=C(F)C=C3)C2)C2=C1N=CC=C2
Asn1279	CC(=O)NCCN1N=C(C2CCCN(CC3=NC(C)=CC=C3)C2)C2=C1N=CC=C2
Asn1280	CN1C=C(CN2CCCC(C2)C2=NN(CCNC(C)=O)C3=C2C=CC=N3)C=N1
Asn1281	CC(=O)NCCN1N=C(C2CCCN(CC3=C(F)C(F)=CC=C3)C2)C2=C1N=CC=C2
Asn1282	CC(=O)NCCN1N=C(C2CCCN(CC3=C(C)N=CN3)C2)C2=C1N=CC=C2
Asn1283	COC1=CC=C(CN2CCCC(C2)C2=NN(CCNC(C)=O)C3=C2C=CC=N3)C(C)=C1C
Asn1284	CCN1C=NC=C1CN1CCCC(C1)C1=NN(CCNC(C)=O)C2=C1C=CC=N2
Asn1285	CC(=O)NCCN1N=C(C2CCCN(CC3=CNN=C3C(C)(C)C)C2)C2=C1N=CC=C2
Asn1286	CC(C)OC1=CC(CN2CCCC(C2)C2=NN(CCNC(C)=O)C3=C2C=CC=N3)=CC=C1
Asn1287	COC1=C(C)C=CC=C1CN1CCCC(C1)C1=NN(CCNC(C)=O)C2=C1C=CC=N2
Asn1288	CC(=O)NCCN1N=C(C2CCCN(CC3=CCCOC3)C2)C2=C1N=CC=C2
Asn1289	CN1C=C(C(=N1)C1=CC=C(CNC(=O)C2=C(F)C=CC=C2)C=C1)C1=CC=NC=C1
Asn1290	COC1=CC=CC(CC(=O)NCC2=CC=C(C=C2)C2=NN(C)C=C2C2=CC=NC=C2)=C1
Asn1291	CN1C=C(C(=N1)C1=CC=C(CNC(=O)CC2=C(F)C=CC=C2)C=C1)C1=CC=NC=C1
Asn1292	CN1C=C(C(=N1)C1=CC=C(CNC(=O)C2=CC3=C(OCO3)C=C2)C=C1)C1=CC=NC=C1
Asn1293	CN1C=C(C(=N1)C1=CC=C(CNC(=O)C2=NC=CC=C2)C=C1)C1=CC=NC=C1
Asn1294	CN1C=C(C(=N1)C1=CC=C(CNC(=O)C2=CC=C(C)NC2=O)C=C1)C1=CC=NC=C1
Asn1295	O=C(NCC1=CC=C(C=C1)C1=NNC=C1C1=CC=NC=C1)C1CCC=CC1
Asn1296	CC1=NON=C1C(=O)NCC1=CC=C(C=C1)C1=NNC=C1C1=CC=NC=C1
Asn1297	O=C(CCN1C=CC=N1)NCC1=CC=C(C=C1)C1=NNC=C1C1=CC=NC=C1
Asn1298	CC(C)(C)C1=NNC(=C1)C(=O)NCC1=CC=C(C=C1)C1=NNC=C1C1=CC=NC=C1
Asn1299	CC1=NN(CC(=O)NCC2=CC=C(C=C2)C2=NNC=C2C2=CC=NC=C2)C(C)=C1C
Asn1300	COC1=NOC(CCC(=O)NCC2=CC=C(C=C2)C2=NNC=C2C2=CC=NC=C2)=C1
Asn1301	CC(C)C1=NNC(=C1)C(=O)NCC1=CC=C(C=C1)C1=NN(C)C=C1C1=CC=NC=C1
Asn1302	CN1C=C(C(=N1)C1=CC=C(CNC(=O)CN2N=C(C)C(C)=C2C)C=C1)C1=CC=NC=C1
Asn1303	COC1=NOC(CCC(=O)NCC2=CC=C(C=C2)C2=NN(C)C=C2C2=CC=NC=C2)=C1
Asn1304	CN1C=C(C(=N1)C1=CC=C(CNC(=O)CCCN2N=C(C)C=C2C)C=C1)C1=CC=NC=C1
Asn1305	CCC1=NNC(C(=O)NCC2=CC=C(C=C2)C2=NN(C)C=C2C2=CC=NC=C2)=C1C
Asn1306	CN1C=C(C(=N1)C1=CC=C(CNC(=O)CCCN2C(=O)CNC2=O)C=C1)C1=CC=NC=C1
Asn1307	CN1C=C(C(=N1)C1=CC=C(CNC(=O)CC2CCS(=O)(=O)C2)C=C1)C1=CC=NC=C1
Asn1308	CC1CN(CCC(=O)NCC2=CC=C(C=C2)C2=NN(C)C=C2C2=CC=NC=C2)CC(C)O1
Asn1309	COC1=CC=CC=C1OC(C)C(=O)NCC1=CC=C(C=C1)C1=NN(C)C=C1C1=CC=NC=C1
Asn1310	CN1C=C(C(=N1)C1=CC=C(CNC(=O)COCC2CCCO2)C=C1)C1=CC=NC=C1
Asn1311	CN1C=C(C(=N1)C1=CC=C(CNC(=O)CN2N=C(C=C2C)C(F)F)C=C1)C1=CC=NC=C1
Asn1312	CN1C=C(C(=N1)C1=CC=C(CNC(=O)COCC2CCCCO2)C=C1)C1=CC=NC=C1
Asn1313	CN1C=C(C(=N1)C1=CC=C(CNC(=O)CN2C=C(C)C=N2)C=C1)C1=CC=NC=C1
Asn1314	CN1C=C(C(=N1)C1=CC=C(CNC(=O)CSC2=NC(C)=C(C)O2)C=C1)C1=CC=NC=C1
Asn1315	COC1=CC(=NC(OC)=N1)C(=O)NCC1=CC=C(C=C1)C1=NN(C)C=C1C1=CC=NC=C1
Asn1316	CN1C=C(C(=N1)C1=CC=C(CNC(=O)CCNC2=NC(=O)CS2)C=C1)C1=CC=NC=C1
Asn1317	COC1=C(C)C=C(CC(=O)NCC2=CC=C(C=C2)C2=NN(C)C=C2C2=CC=NC=C2)C=C1
Asn1318	CC1=C(C=CN=C1)C1=CNN=C1C1=CC=C(CNC(=O)C2=CC=CC=C2F)C=C1
Asn1319	CC1=CC=C(C=C1)S(=O)(=O)NCC1=CC=C(C=C1)C1=NNC=C1C1=CC=NC=C1
Asn1320	FC1=CC=C(C=C1)S(=O)(=O)NCC1=CC=C(C=C1)C1=NNC=C1C1=CC=NC=C1
Asn1321	ClC1=CC=C(C=C1)S(=O)(=O)NCC1=CC=C(C=C1)C1=NNC=C1C1=CC=NC=C1
Asn1322	FC1=C(F)C=C(C=C1)S(=O)(=O)NCC1=CC=C(C=C1)C1=NNC=C1C1=CC=NC=C1
Asn1323	CN1N=C(C=C1C(=O)NCC1=CC=C(C=C1)C1=NNC=C1C1=CC=NC=C1)C(F)(F)F
Asn1324	CC1=C(C=CN=C1)C1=CNN=C1C1=CC=C(CNC(=O)C2=CC=CC=C2)C=C1
Asn1325	COC1=CC(=CC=C1)C(=O)NCC1=CC=C(C=C1)C1=NNC=C1C1=C(C)C=NC=C1
Asn1326	CC1=C(C=CN=C1)C1=CNN=C1C1=CC=C(CNC(=O)C2=CC(F)=CC=C2)C=C1
Asn1327	CC1=CC=C(C=C1)S(=O)(=O)NCC1=CC=C(C=C1)C1=NNC=C1C1=C(C)C=NC=C1
Asn1328	CC1=C(C=CN=C1)C1=CNN=C1C1=CC=C(CNS(=O)(=O)C2=CC=C(F)C=C2)C=C1
Asn1329	CN(C)C1=CC=CC(=C1)C(=O)NCC1=CC=C(C=C1)C1=NNC=C1C1=C(C)C=NC=C1
Asn1330	CC1=C(C=CN=C1)C1=CNN=C1C1=CC=C(CNC(=O)C2=CC=C(F)C(F)=C2)C=C1
Asn1331	COC1=CC(=CC=C1)C(=O)NCC1=CC=C(C=C1)C1=NN(C)C=C1C1=C(C)C=NC=C1
Asn1332	CN1C=C(C(=N1)C1=CC=C(CNS(=O)(=O)C2=CC=C(C)C=C2)C=C1)C1=C(C)C=NC=C1
Asn1333	CN(C)C1=CC=CC(=C1)C(=O)NCC1=CC=C(C=C1)C1=NN(C)C=C1C1=C(C)C=NC=C1
Asn1334	CNC1=NC=CC(=C1)C(=O)NCC1=CC=C(C=C1)C1=NN(C)C=C1C1=C(C)C=NC=C1
Asn1335	CN1C=C(C(=N1)C1=CC=C(CNC(=O)COC2=CC=CC=N2)C=C1)C1=C(C)C=NC=C1
Asn1336	CN1C=C(C(=N1)C1=CC=C(CNC(=O)C2=NNC(=C2)C(F)(F)F)C=C1)C1=C(C)C=NC=C1
Asn1337	CN1C=C(C(=N1)C1=CC=CC(CNC(=O)C2=NC=C(C)N=C2)=C1)C1=CC=NC=C1
Asn1338	CN1C=C(C(=N1)C1=CC=CC(CNC(=O)C2=NON=C2C)=C1)C1=CC=NC=C1
Asn1339	CC(C)C1=NNC(=C1)C(=O)NCC1=CC(=CC=C1)C1=NN(C)C=C1C1=CC=NC=C1
Asn1340	CC(N1CCCC1=O)C(=O)NCC1=CC(=CC=C1)C1=NN(C)C=C1C1=CC=NC=C1
Asn1341	CN1C=C(C(=N1)C1=CC=CC(CNC(=O)CCC2NC(=O)NC2=O)=C1)C1=CC=NC=C1
Asn1342	CC(N1CCCC1)C(=O)NCC1=CC(=CC=C1)C1=NN(C)C=C1C1=CC=NC=C1
Asn1343	CC(C)C1=NOC(=C1)C(=O)NCC1=CC(=CC=C1)C1=NN(C)C=C1C1=CC=NC=C1
Asn1344	CN1C=CC(=N1)C(=O)NCC1=CC(=CC=C1)C1=NN(C)C=C1C1=CC=NC=C1
Asn1345	CC(N1CCOCC1)C(=O)NCC1=CC(=CC=C1)C1=NN(C)C=C1C1=CC=NC=C1
Asn1346	CN1C=C(C(=N1)C1=CC=CC(CNC(=O)CC2=C(C)NN=C2C)=C1)C1=CC=NC=C1
Asn1347	CCC1=NNC(C(=O)NCC2=CC(=CC=C2)C2=NN(C)C=C2C2=CC=NC=C2)=C1C
Asn1348	CCC(OC1=CC=CC=C1F)C(=O)NCC1=CC(=CC=C1)C1=NN(C)C=C1C1=CC=NC=C1
Asn1349	COC1=CC(OC(C)C(=O)NCC2=CC(=CC=C2)C2=NN(C)C=C2C2=CC=NC=C2)=CC=C1
Asn1350	COC1=CC=CC=C1OC(C)C(=O)NCC1=CC(=CC=C1)C1=NN(C)C=C1C1=CC=NC=C1
Asn1351	CN1C=C(C(=N1)C1=CC=CC(CNC(=O)CCN2C(=O)NC(C)(C)C2=O)=C1)C1=CC=NC=C1
Asn1352	CC(N1C(=O)NC(C)(C)C1=O)C(=O)NCC1=CC(=CC=C1)C1=NN(C)C=C1C1=CC=NC=C1
Asn1353	CN1C=C(C(=N1)C1=CC=CC(CNC(=O)C2CCS(=O)(=O)C2)=C1)C1=CC=NC=C1
Asn1354	CC(OC1=CC=C(F)C=C1)C(=O)NCC1=CC(=CC=C1)C1=NN(C)C=C1C1=CC=NC=C1
Asn1355	CN1C=C(C(=N1)C1=CC=CC(CNC(=O)COCC2CCCO2)=C1)C1=CC=NC=C1
Asn1356	CN1C=C(C(=N1)C1=CC=CC(CNC(=O)C2CCC(=O)N2)=C1)C1=CC=NC=C1
Asn1357	CN1C=C(C(=N1)C1=CC=CC(CNC(=O)COCC2CCCCO2)=C1)C1=CC=NC=C1
Asn1358	COC1=CC(=NC(OC)=N1)C(=O)NCC1=CC(=CC=C1)C1=NN(C)C=C1C1=CC=NC=C1
Asn1359	CN1C=C(C(=N1)C1=CC=CC(CNC(=O)C2=CC=C(C)NC2=O)=C1)C1=CC=NC=C1
Asn1360	CC(OC1=CC=CC=C1F)C(=O)NCC1=CC(=CC=C1)C1=NN(C)C=C1C1=CC=NC=C1
Asn1361	CC(C)N1CCNC(=O)C1CC(=O)NCC1=CC(=CC=C1)C1=NN(C)C=C1C1=CC=NC=C1
Asn1362	CC(C)C1=CC=C(C(=O)NCC2=CC(=CC=C2)C2=NN(C)C=C2C2=CC=NC=C2)C(=O)N1
Asn1363	CC1=CN=C(C=N1)C(=O)NCC1=CC(=CC=C1)C1=NNC=C1C1=C(C)C=NC=C1
Asn1364	CC1=C(CC(=O)NCC2=CC(=CC=C2)C2=NNC=C2C2=C(C)C=NC=C2)C(C)=NO1
Asn1365	CN1C=C(C(=N1)C1=CC=CC(CNC(=O)C2=NC=C(C)N=C2)=C1)C1=C(C)C=NC=C1
Asn1366	CCOCC1=CC=C(C=C1)C(=O)NCC1=CC(=CC=C1)C1=NN(C)C=C1C1=C(C)C=NC=C1
Asn1367	FC1=CC=C(C=C1)S(=O)(=O)NCC1=CC(=CC=C1)C1=NNC=C1C1=CC=NC=C1
Asn1368	ClC1=CC=C(C=C1)S(=O)(=O)NCC1=CC(=CC=C1)C1=NNC=C1C1=CC=NC=C1
Asn1369	COC1=CC=C(C=C1)S(=O)(=O)NCC1=CC(=CC=C1)C1=NNC=C1C1=CC=NC=C1
Asn1370	CN1N=CC(C(=O)NCC2=CC(=CC=C2)C2=NNC=C2C2=CC=NC=C2)=C1C
Asn1371	CC1=C(CCC(=O)NCC2=CC(=CC=C2)C2=NNC=C2C2=CC=NC=C2)C(C)=NO1
Asn1372	O=C(CCCN1CCCC1=O)NCC1=CC(=CC=C1)C1=NNC=C1C1=CC=NC=C1
Asn1373	CC1=NC=CN1CCC(=O)NCC1=CC(=CC=C1)C1=NNC=C1C1=CC=NC=C1
Asn1374	CCCC1=CC(=NO1)C(=O)NCC1=CC(=CC=C1)C1=NNC=C1C1=CC=NC=C1
Asn1375	O=C(CCCC1=CC=NC=C1)NCC1=CC(=CC=C1)C1=NNC=C1C1=CC=NC=C1
Asn1376	CC1=NC(=O)N(CCC(=O)NCC2=CC(=CC=C2)C2=NNC=C2C2=CC=NC=C2)C(C)=C1
Asn1377	FC1=CC=CC=C1CCC(=O)NCC1=CC(=CC=C1)C1=NNC=C1C1=CC=NC=C1
Asn1378	CN1C(=O)C=C(N(C)C1=O)C(=O)NCC1=CC(=CC=C1)C1=NNC=C1C1=CC=NC=C1
Asn1379	FC1=CC=C(OCC(=O)NCC2=CC(=CC=C2)C2=NNC=C2C2=CC=NC=C2)C=C1Cl
Asn1380	CCCN1C=CC(=N1)C(=O)NCC1=CC(=CC=C1)C1=NNC=C1C1=CC=NC=C1
Asn1381	CC1=CC=CC(C)=C1OCC(=O)NCC1=CC(=CC=C1)C1=NNC=C1C1=CC=NC=C1
Asn1382	CN1N=C(C=C1C(F)(F)F)C(=O)NCC1=CC(=CC=C1)C1=NNC=C1C1=CC=NC=C1
Asn1383	CC1=NC(C)=C(CC(=O)NCC2=CC(=CC=C2)C2=NNC=C2C2=CC=NC=C2)S1
Asn1384	CC1=C(OCCC(=O)NCC2=CC(=CC=C2)C2=NNC=C2C2=CC=NC=C2)C=CC=C1
Asn1385	CC1=CSC(=C1)C(=O)NCC1=CC(=CC=C1)C1=NNC=C1C1=CC=NC=C1
Asn1386	O=C(COC1=CC=CC=N1)NCC1=CC(=CC=C1)C1=NNC=C1C1=CC=NC=C1
Asn1387	CN1N=C(C=C1C(=O)NCC1=CC(=CC=C1)C1=NNC=C1C1=CC=NC=C1)C(F)(F)F
Asn1388	FC(F)(F)C1=CC(=NN1)C(=O)NCC1=CC(=CC=C1)C1=NNC=C1C1=CC=NC=C1
Asn1389	COC1=C(C=CC=C1C)C(=O)NCC1=CC(=CC=C1)C1=NNC=C1C1=CC=NC=C1
Asn1390	O=C(CCC1=CC=NC=C1)NCC1=CC(=CC=C1)C1=NNC=C1C1=CC=NC=C1
Asn1391	O=C(CCCC1=NC=CC=C1)NCC1=CC(=CC=C1)C1=NNC=C1C1=CC=NC=C1
Asn1392	COC1=CC(=CC=C1)C(=O)NCC1=CC(=CC=C1)C1=NN(C)C=C1C1=CC=NC=C1
Asn1393	CN1C=C(C(=N1)C1=CC=CC(CNC(=O)C2=CC(F)=CC=C2)=C1)C1=CC=NC=C1
Asn1394	CN1C=C(C(=N1)C1=CC=CC(CNC(=O)C2=NC=CC=C2)=C1)C1=CC=NC=C1
Asn1395	CN1C=C(C(=N1)C1=CC=CC(CNC(=O)C2=CC=NO2)=C1)C1=CC=NC=C1
Asn1396	CN1C=C(C(=N1)C1=CC=CC(CNC(=O)CN2C(C)=CC(C)=NC2=O)=C1)C1=CC=NC=C1
Asn1397	CN1C=C(C(=N1)C1=CC=CC(CNC(=O)COC2=CC=CC=N2)=C1)C1=CC=NC=C1
Asn1398	CN1C=C(C(=N1)C1=CC=CC(CNC(=O)C2=NNC(=C2)C(F)(F)F)=C1)C1=CC=NC=C1
Asn1399	CC1=C(C=CN=C1)C1=CNN=C1C1=CC=CC(CNC(=O)C2=CC=CC=C2)=C1
Asn1400	CC1=CC=C(C=C1)S(=O)(=O)NCC1=CC(=CC=C1)C1=NNC=C1C1=C(C)C=NC=C1
Asn1401	CC1=C(C=CN=C1)C1=CNN=C1C1=CC=CC(CNS(=O)(=O)C2=CC(F)=C(F)C=C2)=C1
Asn1402	CN1C=C(C(=N1)C1=CC=CC(CNC(=O)CC2=CC=CN=C2)=C1)C1=C(C)C=NC=C1
Asn1403	CN1C=C(C(=N1)C1=CC=CC(CNC(=O)C2=NNC(=C2)C(F)(F)F)=C1)C1=C(C)C=NC=C1
Asn1404	CN(C)CC(=O)NC[C@H]1CC[C@@H](CC1)C1=C(SC2=CC=CC=C12)C(=O)NCCO
Asn1405	NC(=O)C1=C([C@H]2CC[C@H](CNC(=O)CCC3=CC=CC=C3F)CC2)C2=CC=CC=C2S1
Asn1406	CC(C)NC(=O)C1=C([C@H]2CC[C@H](CNC(=O)C3=CN(C)N=C3)CC2)C2=CC=CC=C2S1
Asn1407	CNC(=O)C1=C([C@H]2CC[C@H](CNC(=O)C(C)C)CC2)C2=CC=CC=C2S1
Asn1408	CC(C)NC(=O)C1=C([C@H]2CC[C@H](CNC(=O)C(C)C)CC2)C2=CC=CC=C2S1
Asn1409	CC(C)C(=O)NC[C@H]1CC[C@@H](CC1)C1=C(SC2=CC=CC=C12)C(=O)NCCN(C)C
Asn1410	CC(C)CC(=O)NC[C@H]1CC[C@@H](CC1)C1=C(SC2=CC=CC=C12)C(=O)N1CCOCC1
Asn1411	CNC(=O)C1=C([C@H]2CC[C@H](CNC(=O)CCC3=CC=CC=C3)CC2)C2=CC=CC=C2S1
Asn1412	CCC1=NOC(=C1)C(=O)NC[C@H]1CC[C@@H](CC1)C1=C(SC2=CC=CC=C12)C(=O)NC
Asn1413	CC(C)NC(=O)C1=C([C@H]2CC[C@H](CNC(=O)C3=NC=CN=C3)CC2)C2=CC=CC=C2S1
Asn1414	CC1=CN2N=CC(C(=O)NC[C@H]3CC[C@@H](CC3)C3=C(SC4=CC=CC=C34)C(N)=O)=C2N=C1
Asn1415	CCC(=O)NC[C@H]1CC[C@@H](CC1)C1=C(SC2=CC=CC=C12)C(=O)NCCOC
Asn1416	COCCNC(=O)C1=C([C@H]2CC[C@H](CNC(=O)C(C)(C)C)CC2)C2=CC=CC=C2S1
Asn1417	CN(C)CCNC(=O)C1=C([C@H]2CC[C@H](CNC(=O)C(C)(C)C)CC2)C2=CC=CC=C2S1
Asn1418	COCCNC(=O)C1=C([C@H]2CC[C@H](CNC(=O)COC)CC2)C2=CC=CC=C2S1
Asn1419	COCC(=O)NC[C@H]1CC[C@@H](CC1)C1=C(SC2=CC=CC=C12)C(=O)N1CCOCC1
Asn1420	CNC(=O)C1=C([C@H]2CC[C@H](CNS(=O)(=O)N3CCCC3)CC2)C2=CC=CC=C2S1
Asn1421	CCN(CC)S(=O)(=O)NC[C@H]1CC[C@@H](CC1)C1=C(SC2=CC=CC=C12)C(=O)NC
Asn1422	CC(C)NC(=O)C1=C([C@H]2CC[C@H](CNC(C)=O)CC2)C2=CC=CC=C2S1
Asn1423	COCCNC(=O)C1=C([C@H]2CC[C@H](CNC(C)=O)CC2)C2=CC=CC=C2S1
Asn1424	CN(C)CCNC(=O)C1=C([C@H]2CC[C@H](CNC(C)=O)CC2)C2=CC=CC=C2S1
Asn1425	CC(C)NC(=O)C1=C([C@H]2CC[C@H](CNC(=O)CN3C=CC=N3)CC2)C2=CC=CC=C2S1
Asn1426	CNC(=O)C1=C([C@H]2CC[C@H](CNC(=O)C3=CN4C=CC=NC4=N3)CC2)C2=CC=CC=C2S1
Asn1427	NC(=O)C1=C([C@H]2CC[C@H](CNC(=O)CN3CCCCCC3=O)CC2)C2=CC=CC=C2S1
Asn1428	CN1N=CC(=C1C)S(=O)(=O)NC[C@H]1CC[C@@H](CC1)C1=C(SC2=CC=CC=C12)C(N)=O
Asn1429	CNC(=O)C1=C([C@H]2CC[C@H](CNC(=O)C3=CN=C(NC)N=C3)CC2)C2=CC=CC=C2S1
Asn1430	CNC(=O)C1=C([C@H]2CC[C@H](CNC(=O)CCCN3CCCC3)CC2)C2=CC=CC=C2S1
Asn1431	NC(=O)C1=C([C@H]2CC[C@H](CNC(=O)CCCC3=NC=CC=C3)CC2)C2=CC=CC=C2S1
Asn1432	CCC1=NC=C(CNC[C@H]2CC[C@@H](CC2)C2=C(SC3=CC=CC=C23)C(=O)NC)C=N1
Asn1433	CNC(=O)C1=C([C@H]2CC[C@H](CNCC3=C(NC)N=CC=C3)CC2)C2=CC=CC=C2S1
Asn1434	COC1=CC=CC(CC(=O)NC[C@H]2CC[C@@H](CC2)C2=C(SC3=CC=CC=C23)C(N)=O)=C1
Asn1435	CNC(=O)C1=C([C@H]2CC[C@H](CNS(=O)(=O)C3=CN(C)C=N3)CC2)C2=CC=CC=C2S1
Asn1436	CNC(=O)C1=C([C@H]2CC[C@H](CNS(=O)(=O)C3=CN(C)N=C3)CC2)C2=CC=CC=C2S1
Asn1437	CCC1=NOC(CCC(=O)NC[C@H]2CC[C@@H](CC2)C2=C(SC3=CC=CC=C23)C(N)=O)=N1
Asn1438	COC(C)(C)C(=O)NC[C@H]1CC[C@@H](CC1)C1=C(SC2=CC=CC=C12)C(N)=O
Asn1439	COC(C)(C)C(=O)NC[C@H]1CC[C@@H](CC1)C1=C(SC2=CC=CC=C12)C(=O)NC(C)C
Asn1440	COCCNC(=O)C1=C([C@H]2CC[C@H](CNC(=O)C(C)(C)OC)CC2)C2=CC=CC=C2S1
Asn1441	CC(C)NC(=O)C1=C([C@H]2CC[C@H](CNC(=O)COC(C)C)CC2)C2=CC=CC=C2S1
Asn1442	NC(=O)C1=C([C@H]2CC[C@H](CNC(=O)CC3=NC=CC=C3)CC2)C2=CC=CC=C2S1
Asn1443	COCCC(=O)NC[C@H]1CC[C@@H](CC1)C1=C(SC2=CC=CC=C12)C(=O)NC(C)C
Asn1444	CNC(=O)C1=C([C@H]2CC[C@H](CNC(=O)C3CCCC3)CC2)C2=CC=CC=C2S1
Asn1445	COCCNC(=O)C1=C([C@H]2CC[C@H](CNC(=O)C3CCCC3)CC2)C2=CC=CC=C2S1
Asn1446	NC(=O)C1=C([C@H]2CC[C@H](CNC(=O)CC3CCCC3)CC2)C2=CC=CC=C2S1
Asn1447	OCCNC(=O)C1=C([C@H]2CC[C@H](CNC(=O)CC3CCCC3)CC2)C2=CC=CC=C2S1
Asn1448	CC1=CN=C(C=N1)C(=O)NC[C@H]1CC[C@@H](CC1)C1=C(SC2=CC=CC=C12)C(N)=O
Asn1449	CNC(=O)C1=C([C@H]2CC[C@H](CNC(=O)C3=NC=C(C)N=C3)CC2)C2=CC=CC=C2S1
Asn1450	OCCNC(=O)C1=C([C@H]2CC[C@H](CNC(=O)CN3CCCC3)CC2)C2=CC=CC=C2S1
Asn1451	NC(=O)C1=C([C@H]2CC[C@H](CNC(=O)CN3N=NC4=C3C=CC=C4)CC2)C2=CC=CC=C2S1
Asn1452	CC(C)NC(=O)C1=C([C@H]2CC[C@H](CNC(=O)C3=CNN=C3C)CC2)C2=CC=CC=C2S1
Asn1453	CNC(=O)C1=C([C@H]2CC[C@H](CNC(=O)CCN3N=CC=C3C)CC2)C2=CC=CC=C2S1
Asn1454	CC1=NON=C1C(=O)NC[C@H]1CC[C@@H](CC1)C1=C(SC2=CC=CC=C12)C(=O)NCCO
Asn1455	CC(C)NC(=O)C1=C([C@H]2CC[C@H](CNC(=O)C3=CC=NO3)CC2)C2=CC=CC=C2S1
Asn1456	COCCNC(=O)C1=C([C@H]2CC[C@H](CNC(=O)C3=CC=NO3)CC2)C2=CC=CC=C2S1
Asn1457	CC(C)NC(=O)C1=C([C@H]2CC[C@H](CNCC3=CN(C)N=C3C)CC2)C2=CC=CC=C2S1
Asn1458	NC(=O)C1=C([C@H]2CC[C@H](CNC(=O)CCN3C=NN=N3)CC2)C2=CC=CC=C2S1
Asn1459	CNC(=O)C1=C([C@H]2CC[C@H](CNC(=O)CCN3C=NN=N3)CC2)C2=CC=CC=C2S1
Asn1460	CNC(=O)C1=C([C@H]2CC[C@H](CNC(=O)C3=NOC(=C3)C3CC3)CC2)C2=CC=CC=C2S1
Asn1461	CC(=O)NC1=CC=C(C=C1)C(=O)NC[C@H]1CC[C@@H](CC1)C1=C(SC2=CC=CC=C12)C(N)=O
Asn1462	CC(C)NC(=O)C1=C([C@H]2CC[C@H](CNC(=O)CNC(C)=O)CC2)C2=CC=CC=C2S1
Asn1463	CC(C)NC(=O)C1=C([C@H]2CC[C@H](CNCC3=CN(C)N=C3)CC2)C2=CC=CC=C2S1
Asn1464	CC(=O)N1CCC(CC1)C(=O)NC[C@H]1CC[C@@H](CC1)C1=C(SC2=CC=CC=C12)C(N)=O
Asn1465	CC(C)NC(=O)C1=C([C@H]2CC[C@H](CNC(=O)C3=CC=NN3C)CC2)C2=CC=CC=C2S1
Asn1466	NC(=O)C1=C([C@H]2CC[C@H](CNC(=O)COC3=CC=CC=C3F)CC2)C2=CC=CC=C2S1
Asn1467	CC1=NN(CCC(=O)NC[C@H]2CC[C@@H](CC2)C2=C(SC3=CC=CC=C23)C(N)=O)CC1
Asn1468	CNC(=O)C1=C([C@H]2CC[C@H](CNC(=O)CCN3CCOCC3)CC2)C2=CC=CC=C2S1
Asn1469	CNC(=O)C1=C([C@H]2CC[C@H](CNCC3=CC=NN3C)CC2)C2=CC=CC=C2S1
Asn1470	CC(C)NC(=O)C1=C([C@H]2CC[C@H](CNCC3=CC=NN3C)CC2)C2=CC=CC=C2S1
Asn1471	CN(C)C(=O)C1=CC(=NC2=CC=CC=C12)[C@H]1CC[C@H](CNC(=O)CN2N=C(C)N=C2C)CC1
Asn1472	NC(=O)C1=CC(=NC2=CC=CC=C12)[C@H]1CC[C@H](CNC(=O)CCC2=CC=CC=C2F)CC1
Asn1473	CCN(CC)CC(=O)NC[C@H]1CC[C@@H](CC1)C1=NC2=CC=CC=C2C(=C1)C(=O)NC(C)C
Asn1474	CC(C)NC(=O)C1=CC(=NC2=CC=CC=C12)[C@H]1CC[C@H](CNC(=O)C2=CN(C)N=C2)CC1
Asn1475	CC(C)CNC(=O)C1=CC(=NC2=CC=CC=C12)[C@H]1CC[C@H](CNC(=O)C2=CN(C)N=C2)CC1
Asn1476	CNC(=O)C1=CC(=NC2=CC=CC=C12)[C@H]1CC[C@H](CNC(=O)C(C)C)CC1
Asn1477	CC(C)C(=O)NC[C@H]1CC[C@@H](CC1)C1=NC2=CC=CC=C2C(=C1)C(=O)N1CCOCC1
Asn1478	CC(C)C(=O)NC[C@H]1CC[C@@H](CC1)C1=NC2=CC=CC=C2C(=C1)C(=O)NC1=NC=CS1
Asn1479	CC(C)C(=O)NC[C@H]1CC[C@@H](CC1)C1=NC2=CC=CC=C2C(=C1)C(=O)N1CCN(C)CC1
Asn1480	CC(C)CC(=O)NC[C@H]1CC[C@@H](CC1)C1=NC2=CC=CC=C2C(=C1)C(=O)N1CCOCC1
Asn1481	CN(C)C(=O)C1=CC(=NC2=CC=CC=C12)[C@H]1CC[C@H](CNC(=O)COC2=CC=CC=C2)CC1
Asn1482	CNC(=O)C1=CC(=NC2=CC=CC=C12)[C@H]1CC[C@H](CNC(=O)C2=CC=CC=C2OC)CC1
Asn1483	COC1=C(OC)C(=CC=C1)C(=O)NC[C@H]1CC[C@@H](CC1)C1=NC2=CC=CC=C2C(=C1)C(N)=O
Asn1484	CNC(=O)C1=CC(=NC2=CC=CC=C12)[C@H]1CC[C@H](CNS(=O)(=O)C2=CC=CC=C2)CC1
Asn1485	CC(C)NC(=O)C1=CC(=NC2=CC=CC=C12)[C@H]1CC[C@H](CNC(=O)C2=NC=CN=C2)CC1
Asn1486	CCN1C=CC(=N1)C(=O)NC[C@H]1CC[C@@H](CC1)C1=NC2=CC=CC=C2C(=C1)C(=O)NC(C)C
Asn1487	CN(C)C(=O)C1=CC(=NC2=CC=CC=C12)[C@H]1CC[C@H](CNC(=O)C2=NC(N)=NC(C)=C2)CC1
Asn1488	CN(C)C(=O)C1=CC(=NC2=CC=CC=C12)[C@H]1CC[C@H](CNC(=O)CNS(C)(=O)=O)CC1
Asn1489	CCC(=O)NC[C@H]1CC[C@@H](CC1)C1=NC2=CC=CC=C2C(=C1)C(=O)NCC(C)C
Asn1490	CCC(=O)NC[C@H]1CC[C@@H](CC1)C1=NC2=CC=CC=C2C(=C1)C(=O)NC1=NC=CS1
Asn1491	CCC(=O)NC[C@H]1CC[C@@H](CC1)C1=NC2=CC=CC=C2C(=C1)C(=O)N1CCN(C)CC1
Asn1492	COCC(=O)NC[C@H]1CC[C@@H](CC1)C1=NC2=CC=CC=C2C(=C1)C(=O)NCC(C)C
Asn1493	COCC(=O)NC[C@H]1CC[C@@H](CC1)C1=NC2=CC=CC=C2C(=C1)C(=O)NC1=NC=CS1
Asn1494	CNC(=O)C1=CC(=NC2=CC=CC=C12)[C@H]1CC[C@H](CNC(=O)CCCN2C=CN=C2C)CC1
Asn1495	CNC(=O)C1=CC(=NC2=CC=CC=C12)[C@H]1CC[C@H](CNS(=O)(=O)N(C)C)CC1
Asn1496	CN(C)C(=O)C1=CC(=NC2=CC=CC=C12)[C@H]1CC[C@H](CNC(=O)C2=C(N)N=CC=C2)CC1
Asn1497	CC(C)CNC(=O)C1=CC(=NC2=CC=CC=C12)[C@H]1CC[C@H](CNC(C)=O)CC1
Asn1498	CC(C)NC(=O)C1=CC(=NC2=CC=CC=C12)[C@H]1CC[C@H](CNC(=O)CN2C=CC=N2)CC1
Asn1499	CC(C)CNC(=O)C1=CC(=NC2=CC=CC=C12)[C@H]1CC[C@H](CNC(=O)CN2C=CC=N2)CC1
Asn1500	CNC(=O)C1=CC(=NC2=CC=CC=C12)[C@H]1CC[C@H](CNC(=O)C2=CN3C=CC=NC3=N2)CC1
Asn1501	CN1N=CC(=C1C)S(=O)(=O)NC[C@H]1CC[C@@H](CC1)C1=NC2=CC=CC=C2C(=C1)C(N)=O
Asn1502	CCC1=NC=C(CNC[C@H]2CC[C@@H](CC2)C2=NC3=CC=CC=C3C(=C2)C(=O)NC(C)C)C=N1
Asn1503	CC(C)C1=NC=C(CNC[C@H]2CC[C@@H](CC2)C2=NC3=CC=CC=C3C(=C2)C(=O)N(C)C)C=N1
Asn1504	COCCOC1=CC=CC(CNC[C@H]2CC[C@@H](CC2)C2=NC3=CC=CC=C3C(=C2)C(N)=O)=C1
Asn1505	CN(C)C(=O)C1=CC(=NC2=CC=CC=C12)[C@H]1CC[C@H](CNC(=O)CCC2CCCC2)CC1
Asn1506	COC1=CC=C(CCC(=O)NC[C@H]2CC[C@@H](CC2)C2=NC3=CC=CC=C3C(=C2)C(N)=O)C=C1
Asn1507	CNC(=O)C1=CC(=NC2=CC=CC=C12)[C@H]1CC[C@H](CNC(=O)CC2=NC(=NN2)C(C)C)CC1
Asn1508	CC(C)NC(=O)C1=CC(=NC2=CC=CC=C12)[C@H]1CC[C@H](CNCC2=CN=C(C)S2)CC1
Asn1509	CN(C)C(=O)C1=CC(=NC2=CC=CC=C12)[C@H]1CC[C@H](CNC(=O)CCC2=NC(C)=NO2)CC1
Asn1510	CN1C=C(C=N1)S(=O)(=O)NC[C@H]1CC[C@@H](CC1)C1=NC2=CC=CC=C2C(=C1)C(N)=O
Asn1511	CNC(=O)C1=CC(=NC2=CC=CC=C12)[C@H]1CC[C@H](CNS(=O)(=O)C2=CN(C)N=C2)CC1
Asn1512	CNC(=O)C1=CC(=NC2=CC=CC=C12)[C@H]1CC[C@H](CNC(=O)C(C)(C)OC)CC1
Asn1513	COC(C)(C)C(=O)NC[C@H]1CC[C@@H](CC1)C1=NC2=CC=CC=C2C(=C1)C(=O)N(C)C
Asn1514	COC(C)(C)C(=O)NC[C@H]1CC[C@@H](CC1)C1=NC2=CC=CC=C2C(=C1)C(=O)NCC(C)C
Asn1515	CC(C)NC(=O)C1=CC(=NC2=CC=CC=C12)[C@H]1CC[C@H](CNC(=O)COC(C)C)CC1
Asn1516	COCCC(=O)NC[C@H]1CC[C@@H](CC1)C1=NC2=CC=CC=C2C(=C1)C(=O)NC(C)C
Asn1517	COCCC(=O)NC[C@H]1CC[C@@H](CC1)C1=NC2=CC=CC=C2C(=C1)C(=O)NCC(C)C
Asn1518	CNC(=O)C1=CC(=NC2=CC=CC=C12)[C@H]1CC[C@H](CNC(=O)CC2=CC=C(OC)C=C2)CC1
Asn1519	CN(C)C(=O)C1=CC(=NC2=CC=CC=C12)[C@H]1CC[C@H](CNC(=O)CC2=CC=C(C)C=C2)CC1
Asn1520	CCOC1=CC=C(CC(=O)NC[C@H]2CC[C@@H](CC2)C2=NC3=CC=CC=C3C(=C2)C(N)=O)C=C1
Asn1521	CNC(=O)C1=CC(=NC2=CC=CC=C12)[C@H]1CC[C@H](CNC(=O)CC2CCCC2)CC1
Asn1522	CN(C)C(=O)C1=CC(=NC2=CC=CC=C12)[C@H]1CC[C@H](CNC(=O)C2=NC=C(C)N=C2)CC1
Asn1523	CC(C)NC(=O)C1=CC(=NC2=CC=CC=C12)[C@H]1CC[C@H](CNC(=O)C2=NC=C(C)N=C2)CC1
Asn1524	CC(C)NC(=O)C1=CC(=NC2=CC=CC=C12)[C@H]1CC[C@H](CNC(=O)CN2CCCC2)CC1
Asn1525	CC(C)NC(=O)C1=CC(=NC2=CC=CC=C12)[C@H]1CC[C@H](CNC(=O)C2=CNN=C2C)CC1
Asn1526	CC(C)NC(=O)C1=CC(=NC2=CC=CC=C12)[C@H]1CC[C@H](CNC(=O)C2=NON=C2C)CC1
Asn1527	CC(C)NC(=O)C1=CC(=NC2=CC=CC=C12)[C@H]1CC[C@H](CNC(=O)C2=C(C)N(C)N=C2)CC1
Asn1528	CNC(=O)C1=CC(=NC2=CC=CC=C12)[C@H]1CC[C@H](CNC(=O)C2=NNC3=C2CCCC3)CC1
Asn1529	CNC(=O)C1=CC(=NC2=CC=CC=C12)[C@H]1CC[C@H](CNC(=O)CCC2=C(C)NN=C2C)CC1
Asn1530	CN(C)C(=O)C1=CC(=NC2=CC=CC=C12)[C@H]1CC[C@H](CNC(=O)CN2CCCC2=O)CC1
Asn1531	CN(C)C(=O)C1=CC(=NC2=CC=CC=C12)[C@H]1CC[C@H](CNC(=O)CCN2C=CN=C2C)CC1
Asn1532	NC(=O)C1=CC(=NC2=CC=CC=C12)[C@H]1CC[C@H](CNC(=O)C2=NOC(=C2)C2CC2)CC1
Asn1533	CNC(=O)C1=CC(=NC2=CC=CC=C12)[C@H]1CC[C@H](CNC(=O)C2=NOC(=C2)C2CC2)CC1
Asn1534	CN(C)C(=O)C1=CC(=NC2=CC=CC=C12)[C@H]1CC[C@H](CNC(=O)C2=NOC(=C2)C2CC2)CC1
Asn1535	CCCC1=CC(=NO1)C(=O)NC[C@H]1CC[C@@H](CC1)C1=NC2=CC=CC=C2C(=C1)C(=O)N(C)C
Asn1536	CNC(=O)C1=CC(=NC2=CC=CC=C12)[C@H]1CC[C@H](CNC(=O)CCN2N=C(C)N=C2C)CC1
Asn1537	CC(C)NC(=O)C1=CC(=NC2=CC=CC=C12)[C@H]1CC[C@H](CNC(=O)C2=C(C)N=C(C)O2)CC1
Asn1538	CNC(=O)C1=CC(=NC2=CC=CC=C12)[C@H]1CC[C@H](CNC(=O)CNC(C)=O)CC1
Asn1539	CC(C)NC(=O)C1=CC(=NC2=CC=CC=C12)[C@H]1CC[C@H](CNC(=O)CNC(C)=O)CC1
Asn1540	CC(C)CNC(=O)C1=CC(=NC2=CC=CC=C12)[C@H]1CC[C@H](CNC(=O)CNC(C)=O)CC1
Asn1541	CNC(=O)C1=CC(=NC2=CC=CC=C12)[C@H]1CC[C@H](CNC(=O)C2=CN=C(N=C2)N(C)C)CC1
Asn1542	CC(C)NC(=O)C1=CC(=NC2=CC=CC=C12)[C@H]1CC[C@H](CNC(=O)C2=CC=NN2C)CC1
Asn1543	CC(C)CNC(=O)C1=CC(=NC2=CC=CC=C12)[C@H]1CC[C@H](CNC(=O)C2=CC=NN2C)CC1
Asn1544	NC(=O)C1=CC(=NC2=CC=CC=C12)[C@H]1CC[C@H](CNC(=O)COC2=CC=CC=C2F)CC1
Asn1545	CC(C)N1N=CC=C1C(=O)NC[C@H]1CC[C@@H](CC1)C1=NC2=CC=CC=C2C(=C1)C(=O)N(C)C
Asn1546	CC(C)(C)CNC[C@H]1CC[C@@H](CC1)C1=NC2=CC=CC=C2C(=C1)C(=O)N1CCOCC1
Asn1547	CNC(=O)C1=CC(=NC2=CC=CC=C12)[C@H]1CC[C@H](CNC(=O)CCN2CCC(C)=N2)CC1
Asn1548	CC1=NC(CC(=O)NC[C@H]2CC[C@@H](CC2)C2=NC3=CC=CC=C3C(=C2)C(N)=O)=CS1
Asn1549	CNC(=O)C1=CC(=NC2=CC=CC=C12)[C@H]1CC[C@H](CNC(=O)CN2N=C(C)C=CC2=O)CC1
Asn1550	CC(=O)NC[C@H]1CC[C@@H](CC1)C1=C(SC2=CC=CC=C12)C(=O)NCCN1CCCC1=O
Asn1551	CC(=O)NC[C@H]1CC[C@@H](CC1)C1=C(SC2=CC=CC=C12)C(=O)NCCN1C=CN=C1C
Asn1552	CN(CC1=NON=C1C)C(=O)C1=C([C@H]2CC[C@H](CNC(C)=O)CC2)C2=CC=CC=C2S1
Asn1553	CN1CCC(CC1)NC(=O)C1=C([C@H]2CC[C@H](CNC(C)=O)CC2)C2=CC=CC=C2S1
Asn1554	CC(=O)NC[C@H]1CC[C@@H](CC1)C1=C(SC2=CC=CC=C12)C(=O)NCC1=NOC(C)=N1
Asn1555	CC(=O)NC[C@H]1CC[C@@H](CC1)C1=C(SC2=CC=CC=C12)C(=O)NCC1=NON=C1C
Asn1556	CCC1=NOC(CNC(=O)C2=C([C@H]3CC[C@H](CNC(C)=O)CC3)C3=CC=CC=C3S2)=C1
Asn1557	CC(=O)NC[C@H]1CC[C@@H](CC1)C1=C(SC2=CC=CC=C12)C(=O)NCC(=O)NC(C)(C)C
Asn1558	CC(=O)NC[C@H]1CC[C@@H](CC1)C1=C(SC2=CC=CC=C12)C(=O)NCC1=NC(C)=CC=C1
Asn1559	CC(=O)NC[C@H]1CC[C@@H](CC1)C1=C(SC2=CC=CC=C12)C(=O)N1CCCC1
Asn1560	CC(=O)NC[C@H]1CC[C@@H](CC1)C1=C(SC2=CC=CC=C12)C(=O)NCC1CC1
Asn1561	CC(=O)NC[C@H]1CC[C@@H](CC1)C1=C(SC2=CC=CC=C12)C(=O)NCCC1=CC=CC=C1
Asn1562	NCC1=CC=CC(=C1)C1=C(C=NN1CCO)C1=CC=NC=C1
Asn1563	NCC1=CC=CC(=C1)C1=NN(CCO)C=C1C1=CC=NC=C1
Asn1564	CC1=CN=CC=C1C1=CNN=C1C1=CC=C(CN)C=C1
Asn1565	CN(C)C[C@H]1CC[C@@H](CC1)C1=C(SC2=CC=CC=C12)C(=O)NCCN1C=CC(C)=N1
Asn1566	CN(C)C[C@H]1CC[C@@H](CC1)C1=C(SC2=CC=CC=C12)C(=O)N(C)CC1=NON=C1C
Asn1567	NC1=NC=C(C2=CC=C(C=C2)C(F)(F)F)C(=N1)C1CCCNC1
Asn1568	NC(=O)C1=CC(=CC=C1)C1=CN=C(N)N=C1C1CCCNC1
Asn1569	NC(=O)C1=CC=C(C=C1)C1=CN=C(N)N=C1C1CCCNC1
Asn1570	NC1=NC=C(C2=CC(F)=CC=C2)C(=N1)C1CCCN(C1)C1CCCC1
Asn1571	COC1=CC=C(C=C1)C1=CN=C(N)N=C1C1CCCN(C1)C1CCCC1
Asn1572	NC1=NC=C(C2=CC(F)=CC=C2)C(=N1)C1CCCN(C1)C1CCCCC1
Asn1573	NC1=NC=C(C2=CC=C(F)C=C2)C(=N1)C1CCCN(CC2=CC=CC=C2)C1
Asn1574	NC1=NC=C(C2=CC(F)=CC=C2)C(=N1)C1CCCN(CC2=CC=CC=C2)C1
Asn1575	COC1=CC=C(C=C1)C1=CN=C(N)N=C1C1CCCN(CC2=CC=CC=C2)C1
Asn1576	NC(=O)C1=CC=C(C=C1)C1=CN=C(N)N=C1C1CCCN(CC2=CC=CC=C2)C1
Asn1577	NC1=NC=C(C2=CC=C(F)C=C2)C(=N1)C1CCCN(CC2=CC=C(F)C=C2)C1
Asn1578	NC1=NC=C(C2=CC(F)=CC=C2)C(=N1)C1CCCN(CC2=CC=C(F)C=C2)C1
Asn1579	COC1=CC=C(C=C1)C1=CN=C(N)N=C1C1CCCN(CC2=CC=C(F)C=C2)C1
Asn1580	NC(=O)C1=CC=C(C=C1)C1=CN=C(N)N=C1C1CCCN(CC2=CC=C(F)C=C2)C1
Asn1581	COC1=CC=C(CN2CCCC(C2)C2=NC(N)=NC=C2C2=CC=C(F)C=C2)C=C1
Asn1582	COC1=CC=C(CN2CCCC(C2)C2=NC(N)=NC=C2C2=CC(F)=CC=C2)C=C1
Asn1583	COC1=CC=C(CN2CCCC(C2)C2=NC(N)=NC=C2C2=CC=C(OC)C=C2)C=C1
Asn1584	NC1=NC=C(C2=CC=C(F)C=C2)C(=N1)C1CCCN(C1)C(=O)C1=CC=CC=C1
Asn1585	NC1=NC=C(C2=CC(F)=CC=C2)C(=N1)C1CCCN(C1)C(=O)C1=CC=CC=C1
Asn1586	COC1=CC=C(C=C1)C1=CN=C(N)N=C1C1CCCN(C1)C(=O)C1=CC=CC=C1
Asn1587	NC1=NC=C(C2=CC=C(Cl)C=C2)C(=N1)C1CCCN(C1)C(=O)C1=CC=CC=C1
Asn1588	NC(=O)C1=CC(=CC=C1)C1=CN=C(N)N=C1C1CCCN(C1)C(=O)C1=CC=CC=C1
Asn1589	NC(=O)C1=CC=C(C=C1)C1=CN=C(N)N=C1C1CCCN(C1)C(=O)C1=CC=CC=C1
Asn1590	NC1=NC=C(C2=CC=C(F)C=C2)C(=N1)C1CCCN(CCC2=CC=CC=C2)C1
Asn1591	NC1=NC=C(C2=CC(F)=CC=C2)C(=N1)C1CCCN(CCC2=CC=CC=C2)C1
Asn1592	COC1=CC=C(C=C1)C1=CN=C(N)N=C1C1CCCN(CCC2=CC=CC=C2)C1
Asn1593	NC(=O)C1=CC=C(C=C1)C1=CN=C(N)N=C1C1CCCN(CCC2=CC=CC=C2)C1
Asn1594	NC1=NC=C(C2=CC=C(C=C2)C(F)(F)F)C(=N1)C1CCCN(CC(=O)N2CCCC2)C1
Asn1595	COC1=CC=C(NC(=O)CN2CCCC(C2)C2=NC(N)=NC=C2C2=CC(F)=CC=C2)C=C1
Asn1596	NC1=NC=C(C2=CC(F)=CC=C2)C(=N1)C1CCCN(CC(=O)NC2=CC=C(F)C=C2)C1
Asn1597	COC1=CC=C(C=C1)C1=CN=C(N)N=C1C1CCCN(CC(=O)NC2=CC=C(F)C=C2)C1
Asn1598	NC(=O)C1=CC(=CC=C1)C1=CN=C(N)N=C1C1CCCN(CC2=CC=C(Cl)C=C2)C1
Asn1599	NC(=O)C1=CC=C(C=C1)C1=CN=C(N)N=C1C1CCCN(CC2=CC=C(Cl)C=C2)C1
Asn1600	NC1=NC=C(C2=CC(F)=CC=C2)C(=N1)C1CCCN(CC2=CC=NC=C2)C1
Asn1601	NC1=NC=C(C2=CC=C(Cl)C=C2)C(=N1)C1CCCN(CC2=CC=NC=C2)C1
Asn1602	NC1=NC=C(C2=CC=C(C=C2)C(F)(F)F)C(=N1)C1CCCN(CC2=CC=NC=C2)C1
Asn1603	NC(=O)C1=CC=C(C=C1)C1=CN=C(N)N=C1C1CCCN(CC2=CC=NC=C2)C1
Asn1604	NC1=NC=C(C2=CC=C(F)C=C2)C(=N1)C1CCCN(CC2=CN=CC=C2)C1
Asn1605	NC1=NC=C(C2=CC(F)=CC=C2)C(=N1)C1CCCN(CC2=CN=CC=C2)C1
Asn1606	COC1=CC=C(C=C1)C1=CN=C(N)N=C1C1CCCN(CC2=CN=CC=C2)C1
Asn1607	NC1=NC=C(C2=CC=C(Cl)C=C2)C(=N1)C1CCCN(CC2=CN=CC=C2)C1
Asn1608	NC1=NC=C(C2=CC=C(C=C2)C(F)(F)F)C(=N1)C1CCCN(CC2=CN=CC=C2)C1
Asn1609	NC(=O)C1=CC(=CC=C1)C1=CN=C(N)N=C1C1CCCN(CC2=CN=CC=C2)C1
Asn1610	NC(=O)C1=CC=C(C=C1)C1=CN=C(N)N=C1C1CCCN(CC2=CN=CC=C2)C1
Asn1611	NC1=NC=C(C2=CC(F)=CC=C2)C(=N1)C1CCCN(CC(=O)NC2=NC=CS2)C1
Asn1612	COC1=CC=C(C=C1)C1=CN=C(N)N=C1C1CCCN(CC(=O)NC2=NC=CS2)C1
Asn1613	NC1=NC=C(C2=CC=C(F)C=C2)C(=N1)C1CCCN(CC2=NC=CC=C2)C1
Asn1614	NC1=NC=C(C2=CC(F)=CC=C2)C(=N1)C1CCCN(CC2=NC=CC=C2)C1
Asn1615	COC1=CC=C(C=C1)C1=CN=C(N)N=C1C1CCCN(CC2=NC=CC=C2)C1
Asn1616	NC1=NC=C(C2=CC=C(Cl)C=C2)C(=N1)C1CCCN(CC2=NC=CC=C2)C1
Asn1617	NC1=NC=C(C2=CC=C(C=C2)C(F)(F)F)C(=N1)C1CCCN(CC2=NC=CC=C2)C1
Asn1618	NC(=O)C1=CC=C(C=C1)C1=CN=C(N)N=C1C1CCCN(CC2=NC=CC=C2)C1
Asn1619	NC1=NC=C(C2=CC=C(C=C2)C(F)(F)F)C(=N1)C1CCCN(C1)C(=O)C1CCCCC1
Asn1620	NC(=O)C1=CC=C(C=C1)C1=CN=C(N)N=C1C1CCCN(C1)C(=O)C1CCCCC1
Asn1621	NC1=NC=C(C2=CC=C(F)C=C2)C(=N1)C1CCCN(C1)C(=O)CC1=CC=CC=C1
Asn1622	NC1=NC=C(C2=CC(F)=CC=C2)C(=N1)C1CCCN(C1)C(=O)CC1=CC=CC=C1
Asn1623	NC1=NC=C(C2=CC=C(Cl)C=C2)C(=N1)C1CCCN(C1)C(=O)CC1=CC=CC=C1
Asn1624	NC1=NC=C(C2=CC=C(F)C=C2)C(=N1)C1CCCN(C1)C(=O)CCC1=CC=CC=C1
Asn1625	NC1=NC=C(C2=CC(F)=CC=C2)C(=N1)C1CCCN(C1)C(=O)CCC1=CC=CC=C1
Asn1626	NC1=NC=C(C2=CC=C(Cl)C=C2)C(=N1)C1CCCN(C1)C(=O)CCC1=CC=CC=C1
Asn1627	NC1=NC=C(C2=CC=C(F)C=C2)C(=N1)C1CCCN(C1)C(=O)COC1=CC=CC=C1
Asn1628	NC1=NC=C(C2=CC(F)=CC=C2)C(=N1)C1CCCN(C1)C(=O)COC1=CC=CC=C1
Asn1629	COC1=CC=C(C=C1)C1=CN=C(N)N=C1C1CCCN(C1)C(=O)COC1=CC=CC=C1
Asn1630	NC1=NC=C(C2=CC=C(Cl)C=C2)C(=N1)C1CCCN(C1)C(=O)COC1=CC=CC=C1
Asn1631	NC1=NC=C(C2=CC(F)=CC=C2)C(=N1)C1CCCN(C1)S(=O)(=O)C1=CC=C(F)C=C1
Asn1632	COC1=CC=C(C=C1)C1=CN=C(N)N=C1C1CCCN(C1)S(=O)(=O)C1=CC=C(F)C=C1
Asn1633	NC1=NC=C(C2=CC(F)=CC=C2)C(=N1)C1CCCN(C1)C(=O)C1=CN=CC=C1
Asn1634	COC1=CC=C(C=C1)C1=CN=C(N)N=C1C1CCCN(C1)C(=O)C1=CN=CC=C1
Asn1635	NC1=NC=C(C2=CC=C(Cl)C=C2)C(=N1)C1CCCN(C1)C(=O)C1=CN=CC=C1
Asn1636	NC1=NC=C(C2=CC=C(C=C2)C(F)(F)F)C(=N1)C1CCCN(C1)C(=O)C1=CN=CC=C1
Asn1637	COC1=CC=C(C=C1)C1=CN=C(N)N=C1C1CCCN(C1)C(=O)C1=CC=NC=C1
Asn1638	NC1=NC=C(C2=CC=C(C=C2)C(F)(F)F)C(=N1)C1CCCN(C1)C(=O)C1=CC=NC=C1
Asn1639	NC1=NC=C(C2=CC=C(C=C2)C(F)(F)F)C(=N1)C1CCCN(C1)C(=O)C1=NC=CC=C1
Asn1640	COCC(=O)N1CCCC(C1)C1=NC(N)=NC=C1C1=CC=C(F)C=C1
Asn1641	COCC(=O)N1CCCC(C1)C1=NC(N)=NC=C1C1=CC(F)=CC=C1
Asn1642	COCC(=O)N1CCCC(C1)C1=NC(N)=NC=C1C1=CC=C(OC)C=C1
Asn1643	COCC(=O)N1CCCC(C1)C1=NC(N)=NC=C1C1=CC=C(Cl)C=C1
Asn1644	COCC(=O)N1CCCC(C1)C1=NC(N)=NC=C1C1=CC=C(C=C1)C(F)(F)F
Asn1645	COC1=CC=C(C=C1)C1=CN=C(N)N=C1C1CCCN(C1)S(=O)(=O)N(C)C
Asn1646	NC(=O)C1=CC=C(C=C1)C1=CN=C(N)N=C1C1CCCN(CC2CCCCC2)C1
Asn1647	COC1=CC=C(C=C1)C1=CN=C(N)N=C1C1CCCN(C1)C(=O)C1CCC1
Asn1648	COC1=CC=C(CCC(=O)N2CCCC(C2)C2=NC(N)=NC=C2C2=CC=C(F)C=C2)C=C1
Asn1649	NC1=NC=C(C2=CC=C(F)C=C2)C(=N1)C1CCCN(C1)C(=O)CC1=NC=CC=C1
Asn1650	COC1=CC=C(C=C1)C1=CN=C(N)N=C1C1CCCN(C1)C(=O)CC1=NC=CC=C1
Asn1651	NC1=NC=C(C2=CC=C(Cl)C=C2)C(=N1)C1CCCN(C1)C(=O)CC1=NC=CC=C1
Asn1652	CN(C)C(=O)CN1CCCC(C1)C1=NC(N)=NC=C1C1=CC=C(C=C1)C(F)(F)F
Asn1653	NC(=O)C1=CC=C(C=C1)C1=CN=C(N)N=C1C1CCCN(CCCC2=CC=CC=C2)C1
Asn1654	COC1=CC=C(CC(=O)N2CCCC(C2)C2=NC(N)=NC=C2C2=CC=C(F)C=C2)C=C1
Asn1655	COC1=CC=C(CC(=O)N2CCCC(C2)C2=NC(N)=NC=C2C2=CC(F)=CC=C2)C=C1
Asn1656	COC1=CC=C(CC(=O)N2CCCC(C2)C2=NC(N)=NC=C2C2=CC=C(OC)C=C2)C=C1
Asn1657	COC1=CC=C(CC(=O)N2CCCC(C2)C2=NC(N)=NC=C2C2=CC=C(Cl)C=C2)C=C1
Asn1658	NC1=NC=C(C2=CC=C(F)C=C2)C(=N1)C1CCCN(C1)C(=O)CC1=CC=C(F)C=C1
Asn1659	NC1=NC=C(C2=CC(F)=CC=C2)C(=N1)C1CCCN(C1)C(=O)CC1=CC=C(F)C=C1
Asn1660	COC1=CC=C(C=C1)C1=CN=C(N)N=C1C1CCCN(C1)C(=O)CC1=CC=C(F)C=C1
Asn1661	NC1=NC=C(C2=CC=C(Cl)C=C2)C(=N1)C1CCCN(C1)C(=O)CC1=CC=C(F)C=C1
Asn1662	NC(=O)C1=CC=C(C=C1)C1=CN=C(N)N=C1C1CCCN(C1)C(=O)CC1=CC=C(F)C=C1
Asn1663	NC1=NC=C(C2=CC=C(F)C=C2)C(=N1)C1CCCN(C1)C(=O)C1CCCC1
Asn1664	NC1=NC=C(C2=CC(F)=CC=C2)C(=N1)C1CCCN(C1)C(=O)C1CCCC1
Asn1665	COC1=CC=C(C=C1)C1=CN=C(N)N=C1C1CCCN(C1)C(=O)C1CCCC1
Asn1666	NC1=NC=C(C2=CC=C(Cl)C=C2)C(=N1)C1CCCN(C1)C(=O)C1CCCC1
Asn1667	NC1=NC=C(C2=CC=C(C=C2)C(F)(F)F)C(=N1)C1CCCN(C1)C(=O)C1CCCC1
Asn1668	NC(=O)C1=CC(=CC=C1)C1=CN=C(N)N=C1C1CCCN(C1)C(=O)C1CCCC1
Asn1669	NC1=NC=C(C2=CC(F)=CC=C2)C(=N1)C1CCCN(C1)C(=O)CC1=CNC2=CC=CC=C12
Asn1670	NC1=NC=C(C2=CC=C(C=C2)C(F)(F)F)C(=N1)C1CCCN(C1)C(=O)CC1CCCC1
Asn1671	NC(=O)C1=CC(=CC=C1)C1=CN=C(N)N=C1C1CCCN(C1)C(=O)CC1CCCC1
Asn1672	NC(=O)C1=CC=C(C=C1)C1=CN=C(N)N=C1C1CCCN(C1)C(=O)CC1CCCC1
Asn1673	NC1=NC=C(C2=CC=C(F)C=C2)C(=N1)C1CCCN(C1)C(=O)CN1CCOCC1
Asn1674	NC1=NC=C(C2=CC(F)=CC=C2)C(=N1)C1CCCN(C1)C(=O)CN1CCOCC1
Asn1675	COC1=CC=C(C=C1)C1=CN=C(N)N=C1C1CCCN(C1)C(=O)CN1CCOCC1
Asn1676	NC1=NC=C(C2=CC=C(Cl)C=C2)C(=N1)C1CCCN(C1)C(=O)CN1CCOCC1
Asn1677	NC1=NC=C(C2=CC=C(C=C2)C(F)(F)F)C(=N1)C1CCCN(C1)C(=O)CN1CCOCC1
Asn1678	NC1=NC=C(C2=CC=C(F)C=C2)C(=N1)C1CCCN(C1)C(=O)CN1CCCC1
Asn1679	NC1=NC=C(C2=CC(F)=CC=C2)C(=N1)C1CCCN(C1)C(=O)CN1CCCC1
Asn1680	COC1=CC=C(C=C1)C1=CN=C(N)N=C1C1CCCN(C1)C(=O)CN1CCCC1
Asn1681	NC1=NC=C(C2=CC=C(Cl)C=C2)C(=N1)C1CCCN(C1)C(=O)CN1CCCC1
Asn1682	NC1=NC=C(C2=CC=C(C=C2)C(F)(F)F)C(=N1)C1CCCN(C1)C(=O)CN1CCCC1
Asn1683	NC(=O)C1=CC(=CC=C1)C1=CN=C(N)N=C1C1CCCN(C1)C(=O)CN1CCCCCC1
Asn1684	NC1=NC=C(C2=CC=C(C=C2)C(F)(F)F)C(=N1)C1CCCN(C1)C(=O)C1=NNC(=O)C=C1
Asn1685	NC1=NC=C(C2=CC=C(F)C=C2)C(=N1)C1CCCN(C1)C(=O)C1=NNC=C1
Asn1686	NC1=NC=C(C2=CC(F)=CC=C2)C(=N1)C1CCCN(C1)C(=O)C1=NNC=C1
Asn1687	COC1=CC=C(C=C1)C1=CN=C(N)N=C1C1CCCN(C1)C(=O)C1=NNC=C1
Asn1688	NC1=NC=C(C2=CC=C(Cl)C=C2)C(=N1)C1CCCN(C1)C(=O)C1=NNC=C1
Asn1689	NC1=NC=C(C2=CC=C(C=C2)C(F)(F)F)C(=N1)C1CCCN(C1)C(=O)C1=NNC=C1
Asn1690	NC1=NC=C(C2=CC=C(Cl)C=C2)C(=N1)C1CCCN(CC2=CC=C3N=CC=NC3=C2)C1
Asn1691	COC1=CC=C(C=C1)C1=CN=C(N)N=C1C1CCCN(C1)C(=O)C1=C(C)N=CS1
Asn1692	CC1=C(SC=N1)C(=O)N1CCCC(C1)C1=NC(N)=NC=C1C1=CC=C(Cl)C=C1
Asn1693	CC1=C(SC=N1)C(=O)N1CCCC(C1)C1=NC(N)=NC=C1C1=CC=C(C=C1)C(F)(F)F
Asn1694	CC(=O)NC1=CC=C(C=C1)C(=O)N1CCCC(C1)C1=NC(N)=NC=C1C1=CC=C(Cl)C=C1
Asn1695	CC(=O)NCC(=O)N1CCCC(C1)C1=NC(N)=NC=C1C1=CC=C(C=C1)C(F)(F)F
Asn1696	CC(=O)NC1=CC=C(CN2CCCC(C2)C2=NC(N)=NC=C2C2=CC(F)=CC=C2)C=C1
Asn1697	COC1=CC=C(C=C1)C1=CN=C(N)N=C1C1CCCN(CC2=CC=C(NC(C)=O)C=C2)C1
Asn1698	CC(=O)NC1=CC=C(CN2CCCC(C2)C2=NC(N)=NC=C2C2=CC=C(Cl)C=C2)C=C1
Asn1699	CC(=O)N1CCC(CC1)C(=O)N1CCCC(C1)C1=NC(N)=NC=C1C1=CC=C(Cl)C=C1
Asn1700	CN1N=C(C=CC1=O)C(=O)N1CCCC(C1)C1=NC(N)=NC=C1C1=CC=C(Cl)C=C1
Asn1701	CN(C)CC(=O)N1CCCC(C1)C1=NC(N)=NC=C1C1=CC=C(F)C=C1
Asn1702	CN(C)CC(=O)N1CCCC(C1)C1=NC(N)=NC=C1C1=CC(F)=CC=C1
Asn1703	COC1=CC=C(C=C1)C1=CN=C(N)N=C1C1CCCN(C1)C(=O)CN(C)C
Asn1704	CN(C)CC(=O)N1CCCC(C1)C1=NC(N)=NC=C1C1=CC=C(Cl)C=C1
Asn1705	CN1C=C(C=N1)C(=O)N1CCCC(C1)C1=NC(N)=NC=C1C1=CC(F)=CC=C1
Asn1706	COC1=CC=C(C=C1)C1=CN=C(N)N=C1C1CCCN(C1)C(=O)C1=CN(C)N=C1
Asn1707	CN1C=C(C=N1)C(=O)N1CCCC(C1)C1=NC(N)=NC=C1C1=CC=C(Cl)C=C1
Asn1708	CN1C=C(C=N1)C(=O)N1CCCC(C1)C1=NC(N)=NC=C1C1=CC=C(C=C1)C(F)(F)F
Asn1709	CN1C=C(C=CC1=O)C(=O)N1CCCC(C1)C1=NC(N)=NC=C1C1=CC=C(F)C=C1
Asn1710	CN1C=C(C=CC1=O)C(=O)N1CCCC(C1)C1=NC(N)=NC=C1C1=CC(F)=CC=C1
Asn1711	CN1C=C(C=CC1=O)C(=O)N1CCCC(C1)C1=NC(N)=NC=C1C1=CC=C(Cl)C=C1
Asn1712	CS(=O)(=O)NCC(=O)N1CCCC(C1)C1=NC(N)=NC=C1C1=CC=C(F)C=C1
Asn1713	CC(=O)N1CCC(CC1)N1CCCC(C1)C1=NC(N)=NC=C1C1=CC(F)=CC=C1
Asn1714	CC(=O)N1CCC(CC1)N1CCCC(C1)C1=NC(N)=NC=C1C1=CC=C(Cl)C=C1
Asn1715	NC1=NC=C(C2=CC=C(F)C=C2)C(=N1)C1CCCN(C1)C(=O)COC1=CC=C(F)C=C1
Asn1716	NC1=NC=C(C2=CC(F)=CC=C2)C(=N1)C1CCCN(C1)C(=O)COC1=CC=C(F)C=C1
Asn1717	NC1=NC=C(C2=CC=C(Cl)C=C2)C(=N1)C1CCCN(C1)C(=O)COC1=CC=C(F)C=C1
Asn1718	CN1C=CN=C1C(=O)N1CCCC(C1)C1=NC(N)=NC=C1C1=CC(F)=CC=C1
Asn1719	CN1C=CN=C1C(=O)N1CCCC(C1)C1=NC(N)=NC=C1C1=CC=C(Cl)C=C1
Asn1720	CN1C=CN=C1C(=O)N1CCCC(C1)C1=NC(N)=NC=C1C1=CC=C(C=C1)C(F)(F)F
Asn1721	CCC1=NC=C(CN2CCCC(C2)C2=NC(N)=NC=C2C2=CC=C(Cl)C=C2)C=N1
Asn1722	CCC1=NC=C(CN2CCCC(C2)C2=NC(N)=NC=C2C2=CC=C(C=C2)C(F)(F)F)C=N1
Asn1723	CNC1=C(CN2CCCC(C2)C2=NC(N)=NC=C2C2=CC=C(OC)C=C2)C=CC=N1
Asn1724	COC1=CC=C(C=C1)C1=CN=C(N)N=C1C1CCCN(C1)S(=O)(=O)C1=CN(C)C=N1
Asn1725	NC1=NC=C(C2=CC=C(F)C=C2)C(=N1)C1CCCN(C1)C(=O)CCC1=CC=C(F)C=C1
Asn1726	NC1=NC=C(C2=CC(F)=CC=C2)C(=N1)C1CCCN(C1)C(=O)CCC1=CC=C(F)C=C1
Asn1727	NC1=NC=C(C2=CC=C(Cl)C=C2)C(=N1)C1CCCN(C1)C(=O)CCC1=CC=C(F)C=C1
Asn1728	NC(=O)C1=CC(=CC=C1)C1=CN=C(N)N=C1C1CCCN(C1)C(=O)CCC1=CC=C(F)C=C1
Asn1729	CN1CCC(CC1)C(=O)N1CCCC(C1)C1=NC(N)=NC=C1C1=CC=C(F)C=C1
Asn1730	CN1CCC(CC1)C(=O)N1CCCC(C1)C1=NC(N)=NC=C1C1=CC(F)=CC=C1
Asn1731	COC1=CC=C(C=C1)C1=CN=C(N)N=C1C1CCCN(C1)C(=O)C1CCN(C)CC1
Asn1732	CN1CCC(CC1)C(=O)N1CCCC(C1)C1=NC(N)=NC=C1C1=CC=C(Cl)C=C1
Asn1733	CN1CCC(CC1)C(=O)N1CCCC(C1)C1=NC(N)=NC=C1C1=CC=C(C=C1)C(F)(F)F
Asn1734	CN1CCC(CC1)C(=O)N1CCCC(C1)C1=NC(N)=NC=C1C1=CC=C(C=C1)C(N)=O
Asn1735	NC1=NC=C(C2=CC(F)=CC=C2)C(=N1)C1CCCN(CC2=CC3=C(NC=C3)C=C2)C1
Asn1736	COC1=CC=C(C=C1)C1=CN=C(N)N=C1C1CCCN(CC2=CC3=C(NC=C3)C=C2)C1
Asn1737	CC(C)NC(=O)C1=CC(=NC2=CC=CC=C12)[C@H]1CC[C@H](CNC(=O)C2=CN=CC=C2)CC1
Asn1738	CC(C)NC(=O)C1=CC(=NC2=CC=CC=C12)[C@H]1CC[C@H](CNC(=O)C2=CC=NC=C2)CC1
Asn1739	O=C(NC[C@H]1CC[C@@H](CC1)C1=NC2=CC=CC=C2C(=C1)C(=O)N1CCOCC1)C1CCC1
Asn1740	CC(C)NC(=O)C1=CC(=NC2=CC=CC=C12)[C@H]1CC[C@H](CNC(=O)C2=NNC=C2)CC1
Asn1741	CC1=NC=CN1C1=C(N=CC=N1)C1CCCNC1
Asn1742	CC(C)NC(=O)C1=CC(=NC2=CC=CC=C12)[C@H]1CC[C@H](CNC(C)=O)CC1
Asn1743	COCC(=O)NC[C@H]1CC[C@@H](CC1)C1=NC2=CC=CC=C2C(=C1)C(=O)NC(C)C
Asn1744	CC(C)NC(=O)C1=CC(=NC2=CC=CC=C12)[C@H]1CC[C@H](CNC(=O)CC2=NC=CC=C2)CC1
Asn1745	O=C(NC[C@H]1CC[C@@H](CC1)C1=NC2=CC=CC=C2C(=C1)C(=O)N1CCOCC1)C1CCCC1
Asn1746	CC(C)NC(=O)C1=CC(=NC2=CC=CC=C12)[C@H]1CC[C@H](CNC(=O)CN(C)C)CC1
Asn1747	CC1=NC=CN1C1=C(N=CC=N1)C1CCCN(C1)C1CCCC1
Asn1748	C1CCC(CC1)N1CCCC(C1)C1=C(N=CC=N1)N1C=CN=C1
Asn1749	C(N1CCC(CC1)C1=C(N=CC=N1)N1C=CN=C1)C1=CC=CC=C1
Asn1750	C(N1CCCC(C1)C1=C(N=CC=N1)N1C=CN=C1)C1=CC=CC=C1
Asn1751	CC1=NC=CN1C1=C(N=CC=N1)C1CCN(CC2=CC=CC=C2)CC1
Asn1752	CCC1=NC=CN1C1=C(N=CC=N1)C1CCN(CC2=CC=CC=C2)CC1
Asn1753	CCC1=NC=CN1C1=C(N=CC=N1)C1CCCN(CC2=CC=CC=C2)C1
Asn1754	CC(C)C1=NC=CN1C1=C(N=CC=N1)C1CCCN(CC2=CC=CC=C2)C1
Asn1755	CN1CCCC(C1)C1=C(N=CC=N1)N1C=CN=C1
Asn1756	FC1=CC=C(CN2CCC(CC2)C2=C(N=CC=N2)N2C=CN=C2)C=C1
Asn1757	FC1=CC=C(CN2CCCC(C2)C2=C(N=CC=N2)N2C=CN=C2)C=C1
Asn1758	CC1=NC=CN1C1=C(N=CC=N1)C1CCN(CC2=CC=C(F)C=C2)CC1
Asn1759	CC1=NC=CN1C1=C(N=CC=N1)C1CCCN(CC2=CC=C(F)C=C2)C1
Asn1760	CCC1=NC=CN1C1=C(N=CC=N1)C1CCN(CC2=CC=C(F)C=C2)CC1
Asn1761	CCC1=NC=CN1C1=C(N=CC=N1)C1CCCN(CC2=CC=C(F)C=C2)C1
Asn1762	CC(C)C1=NC=CN1C1=C(N=CC=N1)C1CCCN(CC2=CC=C(F)C=C2)C1
Asn1763	COC1=CC=C(CN2CCC(CC2)C2=C(N=CC=N2)N2C=CN=C2)C=C1
Asn1764	COC1=CC=C(CN2CCCC(C2)C2=C(N=CC=N2)N2C=CN=C2)C=C1
Asn1765	COC1=CC=C(CN2CCC(CC2)C2=C(N=CC=N2)N2C=CN=C2C)C=C1
Asn1766	COC1=CC=C(CN2CCCC(C2)C2=C(N=CC=N2)N2C=CN=C2C)C=C1
Asn1767	CCC1=NC=CN1C1=C(N=CC=N1)C1CCN(CC2=CC=C(OC)C=C2)CC1
Asn1768	CCC1=NC=CN1C1=C(N=CC=N1)C1CCCN(CC2=CC=C(OC)C=C2)C1
Asn1769	O=C(N1CCCC(C1)C1=C(N=CC=N1)N1C=CN=C1)C1=CC=CC=C1
Asn1770	CC1=NC=CN1C1=C(N=CC=N1)C1CCN(CC1)C(=O)C1=CC=CC=C1
Asn1771	CC1=NC=CN1C1=C(N=CC=N1)C1CCCN(C1)C(=O)C1=CC=CC=C1
Asn1772	CCC1=NC=CN1C1=C(N=CC=N1)C1CCN(CC1)C(=O)C1=CC=CC=C1
Asn1773	CCC1=NC=CN1C1=C(N=CC=N1)C1CCCN(C1)C(=O)C1=CC=CC=C1
Asn1774	FC1=CC=C(C=C1)C(=O)N1CCC(CC1)C1=C(N=CC=N1)N1C=CN=C1
Asn1775	FC1=CC=C(C=C1)C(=O)N1CCCC(C1)C1=C(N=CC=N1)N1C=CN=C1
Asn1776	CC1=NC=CN1C1=C(N=CC=N1)C1CCN(CC1)C(=O)C1=CC=C(F)C=C1
Asn1777	CC1=NC=CN1C1=C(N=CC=N1)C1CCCN(C1)C(=O)C1=CC=C(F)C=C1
Asn1778	CCC1=NC=CN1C1=C(N=CC=N1)C1CCN(CC1)C(=O)C1=CC=C(F)C=C1
Asn1779	CCC1=NC=CN1C1=C(N=CC=N1)C1CCCN(C1)C(=O)C1=CC=C(F)C=C1
Asn1780	CC(C)C1=NC=CN1C1=C(N=CC=N1)C1CCCN(C1)C(=O)C1=CC=C(F)C=C1
Asn1781	C(CC1=CC=CC=C1)N1CCC(CC1)C1=C(N=CC=N1)N1C=CN=C1
Asn1782	CC1=NC=CN1C1=C(N=CC=N1)C1CCN(CCC2=CC=CC=C2)CC1
Asn1783	CC1=NC=CN1C1=C(N=CC=N1)C1CCCN(CCC2=CC=CC=C2)C1
Asn1784	CCC1=NC=CN1C1=C(N=CC=N1)C1CCCN(CCC2=CC=CC=C2)C1
Asn1785	CC(C)C1=NC=CN1C1=C(N=CC=N1)C1CCCN(CCC2=CC=CC=C2)C1
Asn1786	O=C(CN1CCCC(C1)C1=C(N=CC=N1)N1C=CN=C1)N1CCOCC1
Asn1787	O=C(CN1CCCC(C1)C1=C(N=CC=N1)N1C=CN=C1)N1CCCC1
Asn1788	C(N1CCCC(C1)C1=C(N=CC=N1)N1C=CN=C1)C1=CN=CC=C1
Asn1789	CC1=NC=CN1C1=C(N=CC=N1)C1CCCN(CC2=CN=CC=C2)C1
Asn1790	CCC1=NC=CN1C1=C(N=CC=N1)C1CCCN(CC2=CN=CC=C2)C1
Asn1791	CC(C)C1=NC=CN1C1=C(N=CC=N1)C1CCCN(CC2=CN=CC=C2)C1
Asn1792	CC1=NC=CN1C1=C(N=CC=N1)C1CCCN(CC2=NC=CC=C2)C1
Asn1793	CCC1=NC=CN1C1=C(N=CC=N1)C1CCN(CC2=NC=CC=C2)CC1
Asn1794	CCC1=NC=CN1C1=C(N=CC=N1)C1CCCN(CC2=NC=CC=C2)C1
Asn1795	CC(C)C1=NC=CN1C1=C(N=CC=N1)C1CCCN(CC2=NC=CC=C2)C1
Asn1796	O=C(CC1=CC=CC=C1)N1CCC(CC1)C1=C(N=CC=N1)N1C=CN=C1
Asn1797	O=C(CC1=CC=CC=C1)N1CCCC(C1)C1=C(N=CC=N1)N1C=CN=C1
Asn1798	CC1=NC=CN1C1=C(N=CC=N1)C1CCN(CC1)C(=O)CC1=CC=CC=C1
Asn1799	CC1=NC=CN1C1=C(N=CC=N1)C1CCCN(C1)C(=O)CC1=CC=CC=C1
Asn1800	CCC1=NC=CN1C1=C(N=CC=N1)C1CCN(CC1)C(=O)CC1=CC=CC=C1
Asn1801	CC(C)C1=NC=CN1C1=C(N=CC=N1)C1CCCN(C1)C(=O)CC1=CC=CC=C1
Asn1802	O=C(CCC1=CC=CC=C1)N1CCC(CC1)C1=C(N=CC=N1)N1C=CN=C1
Asn1803	O=C(CCC1=CC=CC=C1)N1CCCC(C1)C1=C(N=CC=N1)N1C=CN=C1
Asn1804	CC1=NC=CN1C1=C(N=CC=N1)C1CCCN(C1)C(=O)CCC1=CC=CC=C1
Asn1805	CCC1=NC=CN1C1=C(N=CC=N1)C1CCCN(C1)C(=O)CCC1=CC=CC=C1
Asn1806	CC(C)C1=NC=CN1C1=C(N=CC=N1)C1CCCN(C1)C(=O)CCC1=CC=CC=C1
Asn1807	O=C(COC1=CC=CC=C1)N1CCC(CC1)C1=C(N=CC=N1)N1C=CN=C1
Asn1808	O=C(COC1=CC=CC=C1)N1CCCC(C1)C1=C(N=CC=N1)N1C=CN=C1
Asn1809	CC1=NC=CN1C1=C(N=CC=N1)C1CCN(CC1)C(=O)COC1=CC=CC=C1
Asn1810	CC1=NC=CN1C1=C(N=CC=N1)C1CCCN(C1)C(=O)COC1=CC=CC=C1
Asn1811	CCC1=NC=CN1C1=C(N=CC=N1)C1CCN(CC1)C(=O)COC1=CC=CC=C1
Asn1812	CCC1=NC=CN1C1=C(N=CC=N1)C1CCCN(C1)C(=O)COC1=CC=CC=C1
Asn1813	CC(C)C1=NC=CN1C1=C(N=CC=N1)C1CCCN(C1)C(=O)COC1=CC=CC=C1
Asn1814	O=C(N1CCCC(C1)C1=C(N=CC=N1)N1C=CN=C1)C1=CN=CC=C1
Asn1815	CC1=NC=CN1C1=C(N=CC=N1)C1CCN(CC1)C(=O)C1=CN=CC=C1
Asn1816	CCC1=NC=CN1C1=C(N=CC=N1)C1CCN(CC1)C(=O)C1=CN=CC=C1
Asn1817	CCC1=NC=CN1C1=C(N=CC=N1)C1CCCN(C1)C(=O)C1=CN=CC=C1
Asn1818	CC(C)C1=NC=CN1C1=C(N=CC=N1)C1CCCN(C1)C(=O)C1=CN=CC=C1
Asn1819	CCC1=NC=CN1C1=C(N=CC=N1)C1CCCN(C1)C(=O)C1=CC=NC=C1
Asn1820	CCC1=NC=CN1C1=C(N=CC=N1)C1CCN(CC1)C(=O)COC
Asn1821	CCC1=NC=CN1C1=C(N=CC=N1)C1CCCN(C1)C(=O)COC
Asn1822	COCC(=O)N1CCCC(C1)C1=C(N=CC=N1)N1C=CN=C1C(C)C
Asn1823	O=S(=O)(N1CCCC1)N1CCCC(C1)C1=C(N=CC=N1)N1C=CN=C1
Asn1824	CN(C)S(=O)(=O)N1CCCC(C1)C1=C(N=CC=N1)N1C=CN=C1
Asn1825	COC1=CC=C(CCC(=O)N2CCC(CC2)C2=C(N=CC=N2)N2C=CN=C2)C=C1
Asn1826	COC1=CC=C(CCC(=O)N2CCCC(C2)C2=C(N=CC=N2)N2C=CN=C2)C=C1
Asn1827	CCC1=NC=CN1C1=C(N=CC=N1)C1CCN(CC1)C(=O)CCC1=CC=C(OC)C=C1
Asn1828	CCC1=NC=CN1C1=C(N=CC=N1)C1CCCN(C1)C(=O)CCC1=CC=C(OC)C=C1
Asn1829	COC1=CC=C(CCC(=O)N2CCCC(C2)C2=C(N=CC=N2)N2C=CN=C2C(C)C)C=C1
Asn1830	O=C(CC1=CC=CN=C1)N1CCC(CC1)C1=C(N=CC=N1)N1C=CN=C1
Asn1831	O=C(CC1=CC=CN=C1)N1CCCC(C1)C1=C(N=CC=N1)N1C=CN=C1
Asn1832	CCC1=NC=CN1C1=C(N=CC=N1)C1CCN(CC1)C(=O)CC1=CC=CN=C1
Asn1833	CCC1=NC=CN1C1=C(N=CC=N1)C1CCCN(C1)C(=O)CC1=CC=CN=C1
Asn1834	CCC1=NC=CN1C1=C(N=CC=N1)C1CCN(CC1)C(=O)CC1=CC=NC=C1
Asn1835	CCC1=NC=CN1C1=C(N=CC=N1)C1CCCN(C1)C(=O)CC1=CC=NC=C1
Asn1836	CC(C)C1=NC=CN1C1=C(N=CC=N1)C1CCCN(C1)C(=O)CC1=CC=NC=C1
Asn1837	CN(C)C(=O)CN1CCCC(C1)C1=C(N=CC=N1)N1C=CN=C1
Asn1838	C(CN1CCC(CC1)C1=C(N=CC=N1)N1C=CN=C1)CC1=CC=CC=C1
Asn1839	CC1=NC=CN1C1=C(N=CC=N1)C1CCN(CCCC2=CC=CC=C2)CC1
Asn1840	CC1=NC=CN1C1=C(N=CC=N1)C1CCCN(CCCC2=CC=CC=C2)C1
Asn1841	CCC1=NC=CN1C1=C(N=CC=N1)C1CCN(CCCC2=CC=CC=C2)CC1
Asn1842	CCC1=NC=CN1C1=C(N=CC=N1)C1CCCN(CCCC2=CC=CC=C2)C1
Asn1843	CC(C)C1=NC=CN1C1=C(N=CC=N1)C1CCCN(CCCC2=CC=CC=C2)C1
Asn1844	COC1=CC=C(CC(=O)N2CCC(CC2)C2=C(N=CC=N2)N2C=CN=C2)C=C1
Asn1845	COC1=CC=C(CC(=O)N2CCCC(C2)C2=C(N=CC=N2)N2C=CN=C2)C=C1
Asn1846	COC1=CC=C(CC(=O)N2CCCC(C2)C2=C(N=CC=N2)N2C=CN=C2C(C)C)C=C1
Asn1847	FC1=CC=C(CC(=O)N2CCC(CC2)C2=C(N=CC=N2)N2C=CN=C2)C=C1
Asn1848	FC1=CC=C(CC(=O)N2CCCC(C2)C2=C(N=CC=N2)N2C=CN=C2)C=C1
Asn1849	CC(C)C1=NC=CN1C1=C(N=CC=N1)C1CCCN(C1)C(=O)CC1=CC=C(F)C=C1
Asn1850	O=C(C1CCCC1)N1CCC(CC1)C1=C(N=CC=N1)N1C=CN=C1
Asn1851	O=C(C1CCCC1)N1CCCC(C1)C1=C(N=CC=N1)N1C=CN=C1
Asn1852	CC(C)C1=NC=CN1C1=C(N=CC=N1)C1CCCN(C1)C(=O)C1CCCC1
Asn1853	O=C(CC1=CNC2=CC=CC=C12)N1CCC(CC1)C1=C(N=CC=N1)N1C=CN=C1
Asn1854	O=C(CC1=CNC2=CC=CC=C12)N1CCCC(C1)C1=C(N=CC=N1)N1C=CN=C1
Asn1855	CC(C)C1=NC=CN1C1=C(N=CC=N1)C1CCCN(C1)C(=O)CC1=CNC2=CC=CC=C12
Asn1856	O=C(CN1CCOCC1)N1CCCC(C1)C1=C(N=CC=N1)N1C=CN=C1
Asn1857	CC1=C(SC=N1)C(=O)N1CCC(CC1)C1=C(N=CC=N1)N1C=CN=C1
Asn1858	C1CC(CN(C1)C1CCOCC1)C1=C(N=CC=N1)N1C=CN=C1
Asn1859	CC(=O)N1CCC(CC1)N1CCCC(C1)C1=C(N=CC=N1)N1C=CN=C1C
Asn1860	O=C(CCCC1=CC=CC=C1)N1CCC(CC1)C1=C(N=CC=N1)N1C=CN=C1
Asn1861	CC(C)C1=NC=CN1C1=C(N=CC=N1)C1CCCN(C1)C(=O)CCCC1=CC=CC=C1
Asn1862	COC1=CC=C(CC(=O)N2CCCC(C2)C2=NC(=CN=C2)N2C=CN=C2)C=C1
Asn1863	COC1=CC=C(CC(=O)N2CCCC(C2)C2=NC(=CN=C2)N2C=CN=C2C)C=C1
Asn1864	COC1=CC=C(CC(=O)N2CCCC(C2)C2=NC(=CN=C2)N2C=CN=C2C(C)C)C=C1
Asn1865	COC1=CC=C(CC(=O)N2CCC(CC2)C2=NC(=CN=C2)N2C=CN=C2)C=C1
Asn1866	CCC1=NC=CN1C1=CN=CC(=N1)C1CCN(CC1)C(=O)CC1=CC=C(OC)C=C1
Asn1867	FC1=CC=C(C=C1)C(=O)N1CCC(CC1)C1=NC(=CN=C1)N1C=CN=C1
Asn1868	CCC1=NC=CN1C1=CN=CC(=N1)C1CCN(CC1)C(=O)C1=CC=C(F)C=C1
Asn1869	O=C(N1CCCC(C1)C1=NC(=CN=C1)N1C=CN=C1)C1=CC=CC=C1
Asn1870	CC1=NC=CN1C1=CN=CC(=N1)C1CCCN(C1)C(=O)C1=CC=CC=C1
Asn1871	CCC1=NC=CN1C1=CN=CC(=N1)C1CCCN(C1)C(=O)C1=CC=CC=C1
Asn1872	CC(C)C1=NC=CN1C1=CN=CC(=N1)C1CCCN(C1)C(=O)C1=CC=CC=C1
Asn1873	O=C(N1CCC(CC1)C1=NC(=CN=C1)N1C=CN=C1)C1=CC=CC=C1
Asn1874	CCC1=NC=CN1C1=CN=CC(=N1)C1CCN(CC1)C(=O)C1=CC=CC=C1
Asn1875	CC(C)C1=NC=CN1C1=CN=CC(=N1)C1CCN(CC1)C(=O)C1=CC=CC=C1
Asn1876	O=C(N1CCCC(C1)C1=NC(=CN=C1)N1C=CN=C1)C1=CC=NC=C1
Asn1877	CCC1=NC=CN1C1=CN=CC(=N1)C1CCN(CC1)C(=O)C1=CC=NC=C1
Asn1878	CCC1=NC=CN1C1=CN=CC(=N1)C1CCN(CC1)C(=O)C1=CN=CC=C1
Asn1879	O=C(CC1=CC=CC=C1)N1CCCC(C1)C1=NC(=CN=C1)N1C=CN=C1
Asn1880	CC(C)C1=NC=CN1C1=CN=CC(=N1)C1CCCN(C1)C(=O)CC1=CC=CC=C1
Asn1881	CCC1=NC=CN1C1=CN=CC(=N1)C1CCN(CC1)C(=O)CC1=CC=CC=C1
Asn1882	O=C(CC1=CNC2=CC=CC=C12)N1CCC(CC1)C1=NC(=CN=C1)N1C=CN=C1
Asn1883	CCC1=NC=CN1C1=CN=CC(=N1)C1CCN(CC1)C(=O)CC1=CNC2=CC=CC=C12
Asn1884	CCC1=NC=CN1C1=CN=CC(=N1)C1CCN(CC1)C(=O)COC
Asn1885	FC1=CC=C(CC(=O)N2CCCC(C2)C2=NC(=CN=C2)N2C=CN=C2)C=C1
Asn1886	CCC1=NC=CN1C1=CN=CC(=N1)C1CCCN(C1)C(=O)CC1=CC=C(F)C=C1
Asn1887	CC(C)C1=NC=CN1C1=CN=CC(=N1)C1CCCN(C1)C(=O)CC1=CC=C(F)C=C1
Asn1888	FC1=CC=C(CC(=O)N2CCC(CC2)C2=NC(=CN=C2)N2C=CN=C2)C=C1
Asn1889	CCC1=NC=CN1C1=CN=CC(=N1)C1CCN(CC1)C(=O)CC1=CC=C(F)C=C1
Asn1890	CC(C)C1=NC=CN1C1=CN=CC(=N1)C1CCN(CC1)C(=O)CC1=CC=C(F)C=C1
Asn1891	COC1=CC=C(CCC(=O)N2CCCC(C2)C2=NC(=CN=C2)N2C=CN=C2)C=C1
Asn1892	COC1=CC=C(CCC(=O)N2CCCC(C2)C2=NC(=CN=C2)N2C=CN=C2C(C)C)C=C1
Asn1893	COC1=CC=C(CCC(=O)N2CCC(CC2)C2=NC(=CN=C2)N2C=CN=C2)C=C1
Asn1894	CCC1=NC=CN1C1=CN=CC(=N1)C1CCN(CC1)C(=O)CCC1=CC=C(OC)C=C1
Asn1895	COC1=CC=C(CCC(=O)N2CCC(CC2)C2=NC(=CN=C2)N2C=CN=C2C(C)C)C=C1
Asn1896	CC1=NC=CN1C1=CN=CC(=N1)C1CCCN(C1)C(=O)C1CCC1
Asn1897	O=C(C1CCC1)N1CCC(CC1)C1=NC(=CN=C1)N1C=CN=C1
Asn1898	O=C(C1CCCC1)N1CCCC(C1)C1=NC(=CN=C1)N1C=CN=C1
Asn1899	CC1=NC=CN1C1=CN=CC(=N1)C1CCCN(C1)C(=O)C1CCCC1
Asn1900	CC(C)C1=NC=CN1C1=CN=CC(=N1)C1CCCN(C1)C(=O)C1CCCC1
Asn1901	CCC1=NC=CN1C1=CN=CC(=N1)C1CCN(CC1)C(=O)C1CCCC1
Asn1902	O=C(CCC1=CC=CC=C1)N1CCCC(C1)C1=NC(=CN=C1)N1C=CN=C1
Asn1903	O=C(CCC1=CC=CC=C1)N1CCC(CC1)C1=NC(=CN=C1)N1C=CN=C1
Asn1904	CCC1=NC=CN1C1=CN=CC(=N1)C1CCN(CC1)C(=O)CCC1=CC=CC=C1
Asn1905	O=C(CCCC1=CC=CC=C1)N1CCCC(C1)C1=NC(=CN=C1)N1C=CN=C1
Asn1906	CCC1=NC=CN1C1=CN=CC(=N1)C1CCN(CC1)C(=O)CCCC1=CC=CC=C1
Asn1907	O=C(CC1=CC=CN=C1)N1CCCC(C1)C1=NC(=CN=C1)N1C=CN=C1
Asn1908	O=C(COC1=CC=CC=C1)N1CCCC(C1)C1=NC(=CN=C1)N1C=CN=C1
Asn1909	O=C(COC1=CC=CC=C1)N1CCC(CC1)C1=NC(=CN=C1)N1C=CN=C1
Asn1910	FC1=CC=C(OCC(=O)N2CCCC(C2)C2=NC(=CN=C2)N2C=CN=C2)C=C1
Asn1911	CCC1=NC=CN1C1=CN=CC(=N1)C1CCN(CC1)C(=O)COC1=CC=C(F)C=C1
Asn1912	CC1=C(SC=N1)C(=O)N1CCCC(C1)C1=NC(=CN=C1)N1C=CN=C1
Asn1913	CC1=C(SC=N1)C(=O)N1CCC(CC1)C1=NC(=CN=C1)N1C=CN=C1
Asn1914	CC1=NC=CN1C1=CN=CC(=N1)C1CCCN(CC2=NC=CC=C2)C1
Asn1915	CCC1=NC=CN1C1=CN=CC(=N1)C1CCCN(CC2=NC=CC=C2)C1
Asn1916	C(N1CCC(CC1)C1=NC(=CN=C1)N1C=CN=C1)C1=NC=CC=C1
Asn1917	C(N1CCCC(C1)C1=NC(=CN=C1)N1C=CN=C1)C1=CN=CC=C1
Asn1918	CC1=NC=CN1C1=CN=CC(=N1)C1CCCN(CC2=CN=CC=C2)C1
Asn1919	CCC1=NC=CN1C1=CN=CC(=N1)C1CCCN(CC2=CN=CC=C2)C1
Asn1920	FC1=CC=C(CN2CCCC(C2)C2=NC(=CN=C2)N2C=CN=C2)C=C1
Asn1921	CCC1=NC=CN1C1=CN=CC(=N1)C1CCCN(CC2=CC=C(F)C=C2)C1
Asn1922	FC1=CC=C(CN2CCC(CC2)C2=NC(=CN=C2)N2C=CN=C2)C=C1
Asn1923	C(N1CCCC(C1)C1=NC(=CN=C1)N1C=CN=C1)C1=CC=CC=C1
Asn1924	CCC1=NC=CN1C1=CN=CC(=N1)C1CCCN(CC2=CC=CC=C2)C1
Asn1925	C(N1CCC(CC1)C1=NC(=CN=C1)N1C=CN=C1)C1=CC=CC=C1
Asn1926	CC(C)C1=NC=CN1C1=CN=CC(=N1)C1CCCN(CCCC2=CC=CC=C2)C1
Asn1927	C(CN1CCC(CC1)C1=NC(=CN=C1)N1C=CN=C1)CC1=CC=CC=C1
Asn1928	C(CC1=CC=CC=C1)N1CCC(CC1)C1=NC(=CN=C1)N1C=CN=C1
Asn1929	CCC1=NC=CN1C1=CN=CC(=N1)C1CCCN(C1)C1CCCC1
Asn1930	CC(C)C1=NC=CN1C1=CN=CC(=N1)C1CCCN(C1)C1CCCC1
Asn1931	C1CCC(C1)N1CCC(CC1)C1=NC(=CN=C1)N1C=CN=C1
Asn1932	CCC1=NC=CN1C1=CN=CC(=N1)C1CCCN(C1)C1CCCCC1
Asn1933	CC(C)C1=NC=CN1C1=CN=CC(=N1)C1CCCN(C1)C1CCCCC1
Asn1934	C1CCC(CC1)N1CCC(CC1)C1=NC(=CN=C1)N1C=CN=C1
Asn1935	CC1=NC=CN1C1=CN=CC(=N1)C1CCCN(CC(=O)N2CCOCC2)C1
Asn1936	CC(C)C1=NC=CN1C1=CN=CC(=N1)C1CCCN(CC(=O)N2CCOCC2)C1
Asn1937	O=C(CN1CCC(CC1)C1=NC(=CN=C1)N1C=CN=C1)N1CCOCC1
Asn1938	CC(C)C1=NC=CN1C1=CN=CC(=N1)C1CCCN(CC(=O)N2CCCC2)C1
Asn1939	CC(C)C1=NC=CN1C1=CN=CC(=N1)C1CCCN(C1)S(=O)(=O)C1=CC=C(F)C=C1
Asn1940	CC1=NC=CN1C1=CN=CC(=N1)C1CCCN(CCOC2=CC=CC=C2)C1
Asn1941	FC1=CC=C(CCC(=O)N2CCCC(C2)C2=NC(=CN=C2)N2C=CN=C2)C=C1
Asn1942	CCC1=NC=CN1C1=CN=CC(=N1)C1CCN(CC1)C(=O)CCC1=CC=C(F)C=C1
Asn1943	CCC1=NC=CN1C1=CN=CC(=N1)C1CCN(CC1)C(=O)C1=COC(C)=N1
Asn1944	CC1=NC=CN1C1=CN=CC(=N1)C1CCNCC1
Asn1945	CCC1=NC=CN1C1=CN=CC(=N1)C1CCNCC1
Asn1946	CC(C)C1=NC=CN1C1=CN=CC(=N1)C1CCNCC1
Asn1947	O=C(N1CCCCC1)C1=CC(=CC=C1)C1=CC=C(CC2CCCNC2=O)C=C1
Asn1948	O=C(NCC1=CC=CC=C1)C1=CC(=CC=C1)C1=CC=C(CC2CCCNC2=O)C=C1
Asn1949	O=C(NCCC1=CC=CC=C1)C1=CC(=CC=C1)C1=CC=C(CC2CCCNC2=O)C=C1
Asn1950	O=C(N1CCC2=CC=CC=C2C1)C1=CC(=CC=C1)C1=CC=C(CC2CCCNC2=O)C=C1
Asn1951	CN(CC1=CC=CC=C1)C(=O)C1=CC(=CC=C1)C1=CC=C(CC2CCCNC2=O)C=C1
Asn1952	CC(=O)N1CCN(CC1)C(=O)C1=CC(=CC=C1)C1=CC=C(CC2CCCNC2=O)C=C1
Asn1953	FC1=CC=C(CNC(=O)C2=CC(=CC=C2)C2=CC=C(CC3CCCNC3=O)C=C2)C=C1
Asn1954	O=C(NCCCN1CCCC1=O)C1=CC(=CC=C1)C1=CC=C(CC2CCCNC2=O)C=C1
Asn1955	CN(C)CCNC(=O)C1=CC(=CC=C1)C1=CC=C(CC2CCCNC2=O)C=C1
Asn1956	CC(=O)N1CCCN(CC1)C(=O)C1=CC(=CC=C1)C1=CC=C(CC2CCCNC2=O)C=C1
Asn1957	CN(CCC1=CC=CC=C1)C(=O)C1=CC(=CC=C1)C1=CC=C(CC2CCCNC2=O)C=C1
Asn1958	CN1CCCN(CC1)C(=O)C1=CC(=CC=C1)C1=CC=C(CC2CCCNC2=O)C=C1
Asn1959	CN(CC1=CC=C(Cl)C=C1)C(=O)C1=CC(=CC=C1)C1=CC=C(CC2CCCNC2=O)C=C1
Asn1960	CC(=O)NC1CCN(CC1)C(=O)C1=CC(=CC=C1)C1=CC=C(CC2CCCNC2=O)C=C1
Asn1961	CN(CC1=NOC(C)=C1)C(=O)C1=CC(=CC=C1)C1=CC=C(CC2CCCNC2=O)C=C1
Asn1962	CN(CC1CCN(C)CC1)C(=O)C1=CC(=CC=C1)C1=CC=C(CC2CCCNC2=O)C=C1
Asn1963	CCCCC1CCN(CCCC(=O)C2=C(C)C=CC=C2)CC1
Asn1964	CN1C=C(C2=CSC(NC(=O)C3=CC=CC=C3)=N2)C(=N1)C1=CC=CC=C1
Asn1965	CN1C=C(C2=CSC(NC(=O)C3=CC=CC=C3)=N2)C(=N1)C1=CC=C(F)C=C1
Asn1966	COC1=CC(=CC=C1)C(=O)NC1=NC(=CS1)C1=CN(C)N=C1C1=CC=CC=C1
Asn1967	CCCC(=O)NC1=NC(=CS1)C1=CN(C)N=C1C1=CC=CC=C1
Asn1968	CC(C)CC(=O)NC1=NC(=CS1)C1=CN(C)N=C1C1=CC=CC=C1
Asn1969	CN1C=C(C2=CSC(NC(=O)COC3=CC=CC=C3)=N2)C(=N1)C1=CC=CC=C1
Asn1970	CN1C=C(C2=CSC(NC(=O)COC3=CC=CC=C3)=N2)C(=N1)C1=C(F)C=CC=C1
Asn1971	CN1C=C(C2=CSC(NC(=O)COC3=CC=CC=C3)=N2)C(=N1)C1=CC=C(F)C=C1
Asn1972	COC1=C(OC)C(=CC=C1)C(=O)NC1=NC(=CS1)C1=CN(C)N=C1C1=CC=CC=C1
Asn1973	CN1C=C(C2=CSC(NC(=O)C3=CN=CC=C3)=N2)C(=N1)C1=CC=CC=C1
Asn1974	CN1C=C(C2=CSC(NC(=O)C3=CN=CC=C3)=N2)C(=N1)C1=CC=C(F)C=C1
Asn1975	CN1C=C(C2=CSC(NC(=O)C3=CC=NC=C3)=N2)C(=N1)C1=CC=C(F)C=C1
Asn1976	CCC(=O)NC1=NC(=CS1)C1=CN(C)N=C1C1=CC=CC=C1
Asn1977	CN1C=C(C2=CSC(NC(=O)C3=NC=CC=C3)=N2)C(=N1)C1=CC=CC=C1
Asn1978	CN1C=C(C2=CSC(NC(=O)C3=NC=CC=C3)=N2)C(=N1)C1=CC=C(F)C=C1
Asn1979	COCC(=O)NC1=NC(=CS1)C1=CN(C)N=C1C1=CC=C(F)C=C1
Asn1980	CN1C=C(C2=CSC(NC(=O)CC3=CC=CN=C3)=N2)C(=N1)C1=CC=C(F)C=C1
Asn1981	COCCC(=O)NC1=NC(=CS1)C1=CN(C)N=C1C1=CC=CC=C1
Asn1982	CN1C=C(C2=CSC(NC(=O)C3CCCO3)=N2)C(=N1)C1=CC=C(F)C=C1
Asn1983	CN1C=C(C2=CSC(NC(=O)C3CCCC3)=N2)C(=N1)C1=CC=CC=C1
Asn1984	CN1C=C(C2=CSC(NC(=O)CNC(C)=O)=N2)C(=N1)C1=CC=C(F)C=C1
Asn1985	COC1=C(OCC(=O)NC2=NC(=CS2)C2=CN(C)N=C2C2=CC=C(F)C=C2)C=CC=C1
Asn1986	CC1=NC(=CC(=C1)C1=CC=C(F)C=C1)C1CCN(CC1)C(=O)C1=CC=CC=C1
Asn1987	COC1=CC(=CC=C1)C(=O)N1CCC(CC1)C1=CC(=CC(C)=N1)C1=CC=C(F)C=C1
Asn1988	COC1=CC(C(=O)N2CCC(CC2)C2=CC(=CC(C)=N2)C2=CC=C(F)C=C2)=C(OC)C=C1
Asn1989	CCCC(=O)N1CCC(CC1)C1=CC(=CC(C)=N1)C1=CC=C(F)C=C1
Asn1990	CC(C)C(=O)N1CCC(CC1)C1=CC(=CC(C)=N1)C1=CC=C(F)C=C1
Asn1991	CC(C)CC(=O)N1CCC(CC1)C1=CC(=CC(C)=N1)C1=CC=C(F)C=C1
Asn1992	COC1=CC=CC=C1C(=O)N1CCC(CC1)C1=CC(=CC(C)=N1)C1=CC=C(F)C=C1
Asn1993	COC1=C(OC)C(=CC=C1)C(=O)N1CCC(CC1)C1=CC(=CC(C)=N1)C1=CC=C(F)C=C1
Asn1994	COC1=CC=C(CC(=O)N2CCC(CC2)C2=CC(=CC(C)=N2)C2=CC=C(F)C=C2)C=C1OC
Asn1995	CCC(=O)N1CCC(CC1)C1=CC(=CC(C)=N1)C1=CC=C(F)C=C1
Asn1996	CC1=NC(=CC(=C1)C1=CC=C(F)C=C1)C1CCN(CC1)C(=O)C1=NC=CC=C1
Asn1997	COC1=CC=C(C(=O)N2CCC(CC2)C2=CC(=CC(C)=N2)C2=CC=C(F)C=C2)C(OC)=C1
Asn1998	CC1=NC(=CC(=C1)C1=CC=C(F)C=C1)C1CCN(CC1)C(=O)C1CCCO1
Asn1999	CC1=NC(=CC(=C1)C1=CC=C(F)C=C1)C1CCN(CC1)C(=O)C1CCCC1
[truncated: 4,540 more rows]

## Sheet: Results of VS
Name *	me	bt	Pred-IAi(cj)	PosteriorProbability(-1)	PosteriorProbability(1)
Asn0001	IC50	MAP kinase ERK1	-1	0.79	0.21
Asn0001	Ki	MAP kinase ERK1	-1	0.91	0.09
Asn0001	IC50	MAP kinase ERK2	-1	0.69	0.31
Asn0001	Ki	MAP kinase ERK2	-1	0.9	0.1
Asn0002	IC50	MAP kinase ERK1	-1	0.665	0.335
Asn0002	Ki	MAP kinase ERK1	-1	0.7425	0.2575
Asn0002	IC50	MAP kinase ERK2	-1	0.5892	0.4108
Asn0002	Ki	MAP kinase ERK2	1	0.47	0.53
Asn0003	IC50	MAP kinase ERK1	-1	0.93	0.07
Asn0003	Ki	MAP kinase ERK1	-1	0.91	0.09
Asn0003	IC50	MAP kinase ERK2	-1	0.76	0.24
Asn0003	Ki	MAP kinase ERK2	-1	0.8133	0.1867
Asn0004	IC50	MAP kinase ERK1	-1	0.885	0.115
Asn0004	Ki	MAP kinase ERK1	-1	0.91	0.09
Asn0004	IC50	MAP kinase ERK2	-1	0.635	0.365
Asn0004	Ki	MAP kinase ERK2	-1	0.69	0.31
Asn0005	IC50	MAP kinase ERK1	-1	0.82	0.18
Asn0005	Ki	MAP kinase ERK1	-1	0.89	0.11
Asn0005	IC50	MAP kinase ERK2	-1	0.615	0.385
Asn0005	Ki	MAP kinase ERK2	-1	0.75	0.25
Asn0006	IC50	MAP kinase ERK1	-1	0.63	0.37
Asn0006	Ki	MAP kinase ERK1	-1	0.685	0.315
Asn0006	IC50	MAP kinase ERK2	-1	0.52	0.48
Asn0006	Ki	MAP kinase ERK2	1	0.3383	0.6617
Asn0007	IC50	MAP kinase ERK1	-1	0.63	0.37
Asn0007	Ki	MAP kinase ERK1	-1	0.75	0.25
Asn0007	IC50	MAP kinase ERK2	-1	0.6367	0.3633
Asn0007	Ki	MAP kinase ERK2	1	0.3533	0.6467
Asn0008	IC50	MAP kinase ERK1	-1	0.645	0.355
Asn0008	Ki	MAP kinase ERK1	-1	0.74	0.26
Asn0008	IC50	MAP kinase ERK2	-1	0.6267	0.3733
Asn0008	Ki	MAP kinase ERK2	1	0.3833	0.6167
Asn0009	IC50	MAP kinase ERK1	-1	0.88	0.12
Asn0009	Ki	MAP kinase ERK1	-1	0.86	0.14
Asn0009	IC50	MAP kinase ERK2	-1	0.71	0.29
Asn0009	Ki	MAP kinase ERK2	-1	0.83	0.17
Asn0010	IC50	MAP kinase ERK1	-1	0.7	0.3
Asn0010	Ki	MAP kinase ERK1	-1	0.76	0.24
Asn0010	IC50	MAP kinase ERK2	-1	0.54	0.46
Asn0010	Ki	MAP kinase ERK2	1	0.42	0.58
Asn0011	IC50	MAP kinase ERK1	-1	0.6383	0.3617
Asn0011	Ki	MAP kinase ERK1	-1	0.715	0.285
Asn0011	IC50	MAP kinase ERK2	-1	0.6067	0.3933
Asn0011	Ki	MAP kinase ERK2	1	0.3933	0.6067
Asn0012	IC50	MAP kinase ERK1	-1	0.66	0.34
Asn0012	Ki	MAP kinase ERK1	-1	0.73	0.27
Asn0012	IC50	MAP kinase ERK2	-1	0.57	0.43
Asn0012	Ki	MAP kinase ERK2	1	0.4	0.6
Asn0013	IC50	MAP kinase ERK1	-1	0.85	0.15
Asn0013	Ki	MAP kinase ERK1	-1	0.83	0.17
Asn0013	IC50	MAP kinase ERK2	-1	0.6633	0.3367
Asn0013	Ki	MAP kinase ERK2	-1	0.7	0.3
Asn0014	IC50	MAP kinase ERK1	-1	0.91	0.09
Asn0014	Ki	MAP kinase ERK1	-1	0.94	0.06
Asn0014	IC50	MAP kinase ERK2	-1	0.825	0.175
Asn0014	Ki	MAP kinase ERK2	-1	0.9	0.1
Asn0015	IC50	MAP kinase ERK1	-1	0.93	0.07
Asn0015	Ki	MAP kinase ERK1	-1	0.92	0.08
Asn0015	IC50	MAP kinase ERK2	-1	0.85	0.15
Asn0015	Ki	MAP kinase ERK2	-1	0.83	0.17
Asn0016	IC50	MAP kinase ERK1	-1	0.91	0.09
Asn0016	Ki	MAP kinase ERK1	-1	0.92	0.08
Asn0016	IC50	MAP kinase ERK2	-1	0.86	0.14
Asn0016	Ki	MAP kinase ERK2	-1	0.8733	0.1267
Asn0017	IC50	MAP kinase ERK1	-1	0.86	0.14
Asn0017	Ki	MAP kinase ERK1	-1	0.86	0.14
Asn0017	IC50	MAP kinase ERK2	-1	0.76	0.24
Asn0017	Ki	MAP kinase ERK2	-1	0.69	0.31
Asn0018	IC50	MAP kinase ERK1	-1	0.73	0.27
Asn0018	Ki	MAP kinase ERK1	-1	0.665	0.335
Asn0018	IC50	MAP kinase ERK2	-1	0.59	0.41
Asn0018	Ki	MAP kinase ERK2	-1	0.515	0.485
Asn0019	IC50	MAP kinase ERK1	-1	0.72	0.28
Asn0019	Ki	MAP kinase ERK1	-1	0.665	0.335
Asn0019	IC50	MAP kinase ERK2	-1	0.57	0.43
Asn0019	Ki	MAP kinase ERK2	1	0.495	0.505
Asn0020	IC50	MAP kinase ERK1	-1	0.88	0.12
Asn0020	Ki	MAP kinase ERK1	-1	0.79	0.21
Asn0020	IC50	MAP kinase ERK2	-1	0.85	0.15
Asn0020	Ki	MAP kinase ERK2	-1	0.725	0.275
Asn0021	IC50	MAP kinase ERK1	-1	0.73	0.27
Asn0021	Ki	MAP kinase ERK1	-1	0.65	0.35
Asn0021	IC50	MAP kinase ERK2	-1	0.58	0.42
Asn0021	Ki	MAP kinase ERK2	-1	0.52	0.48
Asn0022	IC50	MAP kinase ERK1	-1	0.71	0.29
Asn0022	Ki	MAP kinase ERK1	-1	0.65	0.35
Asn0022	IC50	MAP kinase ERK2	-1	0.56	0.44
Asn0022	Ki	MAP kinase ERK2	1	0.5	0.5
Asn0023	IC50	MAP kinase ERK1	-1	0.86	0.14
Asn0023	Ki	MAP kinase ERK1	-1	0.87	0.13
Asn0023	IC50	MAP kinase ERK2	-1	0.77	0.23
Asn0023	Ki	MAP kinase ERK2	-1	0.7	0.3
Asn0024	IC50	MAP kinase ERK1	-1	0.73	0.27
Asn0024	Ki	MAP kinase ERK1	-1	0.73	0.27
Asn0024	IC50	MAP kinase ERK2	-1	0.66	0.34
Asn0024	Ki	MAP kinase ERK2	-1	0.65	0.35
Asn0025	IC50	MAP kinase ERK1	-1	0.81	0.19
Asn0025	Ki	MAP kinase ERK1	-1	0.84	0.16
Asn0025	IC50	MAP kinase ERK2	-1	0.73	0.27
Asn0025	Ki	MAP kinase ERK2	-1	0.77	0.23
Asn0026	IC50	MAP kinase ERK1	-1	0.82	0.18
Asn0026	Ki	MAP kinase ERK1	-1	0.97	0.03
Asn0026	IC50	MAP kinase ERK2	-1	0.74	0.26
Asn0026	Ki	MAP kinase ERK2	-1	0.92	0.08
Asn0027	IC50	MAP kinase ERK1	-1	0.85	0.15
Asn0027	Ki	MAP kinase ERK1	-1	0.99	0.01
Asn0027	IC50	MAP kinase ERK2	-1	0.74	0.26
Asn0027	Ki	MAP kinase ERK2	-1	0.93	0.07
Asn0028	IC50	MAP kinase ERK1	-1	0.82	0.18
Asn0028	Ki	MAP kinase ERK1	-1	0.91	0.09
Asn0028	IC50	MAP kinase ERK2	-1	0.67	0.33
Asn0028	Ki	MAP kinase ERK2	-1	0.82	0.18
Asn0029	IC50	MAP kinase ERK1	-1	0.86	0.14
Asn0029	Ki	MAP kinase ERK1	-1	0.93	0.07
Asn0029	IC50	MAP kinase ERK2	-1	0.79	0.21
Asn0029	Ki	MAP kinase ERK2	-1	0.9	0.1
Asn0030	IC50	MAP kinase ERK1	-1	0.9	0.1
Asn0030	Ki	MAP kinase ERK1	-1	0.95	0.05
Asn0030	IC50	MAP kinase ERK2	-1	0.73	0.27
Asn0030	Ki	MAP kinase ERK2	-1	0.87	0.13
Asn0031	IC50	MAP kinase ERK1	-1	0.82	0.18
Asn0031	Ki	MAP kinase ERK1	-1	0.93	0.07
Asn0031	IC50	MAP kinase ERK2	-1	0.74	0.26
Asn0031	Ki	MAP kinase ERK2	-1	0.84	0.16
Asn0032	IC50	MAP kinase ERK1	-1	0.83	0.17
Asn0032	Ki	MAP kinase ERK1	-1	0.9	0.1
Asn0032	IC50	MAP kinase ERK2	-1	0.79	0.21
Asn0032	Ki	MAP kinase ERK2	-1	0.82	0.18
Asn0033	IC50	MAP kinase ERK1	-1	0.71	0.29
Asn0033	Ki	MAP kinase ERK1	-1	0.76	0.24
Asn0033	IC50	MAP kinase ERK2	-1	0.67	0.33
Asn0033	Ki	MAP kinase ERK2	-1	0.77	0.23
Asn0034	IC50	MAP kinase ERK1	-1	0.725	0.275
Asn0034	Ki	MAP kinase ERK1	-1	0.82	0.18
Asn0034	IC50	MAP kinase ERK2	-1	0.635	0.365
Asn0034	Ki	MAP kinase ERK2	-1	0.76	0.24
Asn0035	IC50	MAP kinase ERK1	-1	0.68	0.32
Asn0035	Ki	MAP kinase ERK1	-1	0.81	0.19
Asn0035	IC50	MAP kinase ERK2	-1	0.59	0.41
Asn0035	Ki	MAP kinase ERK2	-1	0.77	0.23
Asn0036	IC50	MAP kinase ERK1	-1	0.91	0.09
Asn0036	Ki	MAP kinase ERK1	-1	0.92	0.08
Asn0036	IC50	MAP kinase ERK2	-1	0.84	0.16
Asn0036	Ki	MAP kinase ERK2	-1	0.9	0.1
Asn0037	IC50	MAP kinase ERK1	-1	0.85	0.15
Asn0037	Ki	MAP kinase ERK1	-1	0.94	0.06
Asn0037	IC50	MAP kinase ERK2	-1	0.73	0.27
Asn0037	Ki	MAP kinase ERK2	-1	0.895	0.105
Asn0038	IC50	MAP kinase ERK1	-1	0.82	0.18
Asn0038	Ki	MAP kinase ERK1	-1	0.93	0.07
Asn0038	IC50	MAP kinase ERK2	-1	0.71	0.29
Asn0038	Ki	MAP kinase ERK2	-1	0.88	0.12
Asn0039	IC50	MAP kinase ERK1	-1	0.98	0.02
Asn0039	Ki	MAP kinase ERK1	-1	0.96	0.04
Asn0039	IC50	MAP kinase ERK2	-1	0.96	0.04
Asn0039	Ki	MAP kinase ERK2	-1	0.97	0.03
Asn0040	IC50	MAP kinase ERK1	-1	0.815	0.185
Asn0040	Ki	MAP kinase ERK1	-1	0.98	0.02
Asn0040	IC50	MAP kinase ERK2	-1	0.805	0.195
Asn0040	Ki	MAP kinase ERK2	-1	0.9567	0.0433
Asn0041	IC50	MAP kinase ERK1	-1	0.835	0.165
Asn0041	Ki	MAP kinase ERK1	-1	0.8783	0.1217
Asn0041	IC50	MAP kinase ERK2	-1	0.635	0.365
Asn0041	Ki	MAP kinase ERK2	-1	0.7783	0.2217
Asn0042	IC50	MAP kinase ERK1	-1	0.98	0.02
Asn0042	Ki	MAP kinase ERK1	-1	0.98	0.02
Asn0042	IC50	MAP kinase ERK2	-1	0.96	0.04
Asn0042	Ki	MAP kinase ERK2	-1	0.98	0.02
Asn0043	IC50	MAP kinase ERK1	-1	0.68	0.32
Asn0043	Ki	MAP kinase ERK1	-1	0.6617	0.3383
Asn0043	IC50	MAP kinase ERK2	-1	0.68	0.32
Asn0043	Ki	MAP kinase ERK2	-1	0.75	0.25
Asn0044	IC50	MAP kinase ERK1	-1	0.92	0.08
Asn0044	Ki	MAP kinase ERK1	-1	0.91	0.09
Asn0044	IC50	MAP kinase ERK2	-1	0.89	0.11
Asn0044	Ki	MAP kinase ERK2	-1	0.89	0.11
Asn0045	IC50	MAP kinase ERK1	-1	0.82	0.18
Asn0045	Ki	MAP kinase ERK1	-1	0.84	0.16
Asn0045	IC50	MAP kinase ERK2	-1	0.81	0.19
Asn0045	Ki	MAP kinase ERK2	-1	0.8267	0.1733
Asn0046	IC50	MAP kinase ERK1	-1	0.83	0.17
Asn0046	Ki	MAP kinase ERK1	-1	0.85	0.15
Asn0046	IC50	MAP kinase ERK2	-1	0.79	0.21
Asn0046	Ki	MAP kinase ERK2	-1	0.85	0.15
Asn0047	IC50	MAP kinase ERK1	-1	0.79	0.21
Asn0047	Ki	MAP kinase ERK1	-1	0.8733	0.1267
Asn0047	IC50	MAP kinase ERK2	-1	0.76	0.24
Asn0047	Ki	MAP kinase ERK2	-1	0.8133	0.1867
Asn0048	IC50	MAP kinase ERK1	-1	0.93	0.07
Asn0048	Ki	MAP kinase ERK1	-1	0.96	0.04
Asn0048	IC50	MAP kinase ERK2	-1	0.88	0.12
Asn0048	Ki	MAP kinase ERK2	-1	0.94	0.06
Asn0049	IC50	MAP kinase ERK1	-1	0.855	0.145
Asn0049	Ki	MAP kinase ERK1	-1	0.87	0.13
Asn0049	IC50	MAP kinase ERK2	-1	0.7325	0.2675
Asn0049	Ki	MAP kinase ERK2	-1	0.7475	0.2525
Asn0050	IC50	MAP kinase ERK1	-1	0.83	0.17
Asn0050	Ki	MAP kinase ERK1	-1	0.75	0.25
Asn0050	IC50	MAP kinase ERK2	-1	0.585	0.415
Asn0050	Ki	MAP kinase ERK2	-1	0.5167	0.4833
Asn0051	IC50	MAP kinase ERK1	-1	0.8	0.2
Asn0051	Ki	MAP kinase ERK1	-1	0.85	0.15
Asn0051	IC50	MAP kinase ERK2	-1	0.77	0.23
Asn0051	Ki	MAP kinase ERK2	-1	0.83	0.17
Asn0052	IC50	MAP kinase ERK1	-1	0.79	0.21
Asn0052	Ki	MAP kinase ERK1	-1	0.8633	0.1367
Asn0052	IC50	MAP kinase ERK2	-1	0.75	0.25
Asn0052	Ki	MAP kinase ERK2	-1	0.8033	0.1967
Asn0053	IC50	MAP kinase ERK1	-1	0.88	0.12
Asn0053	Ki	MAP kinase ERK1	-1	0.98	0.02
Asn0053	IC50	MAP kinase ERK2	-1	0.88	0.12
Asn0053	Ki	MAP kinase ERK2	-1	0.98	0.02
Asn0054	IC50	MAP kinase ERK1	-1	0.8	0.2
Asn0054	Ki	MAP kinase ERK1	-1	0.8	0.2
Asn0054	IC50	MAP kinase ERK2	-1	0.78	0.22
Asn0054	Ki	MAP kinase ERK2	-1	0.81	0.19
Asn0055	IC50	MAP kinase ERK1	-1	0.82	0.18
Asn0055	Ki	MAP kinase ERK1	-1	0.84	0.16
Asn0055	IC50	MAP kinase ERK2	-1	0.79	0.21
Asn0055	Ki	MAP kinase ERK2	-1	0.82	0.18
Asn0056	IC50	MAP kinase ERK1	-1	0.79	0.21
Asn0056	Ki	MAP kinase ERK1	-1	0.8433	0.1567
Asn0056	IC50	MAP kinase ERK2	-1	0.76	0.24
Asn0056	Ki	MAP kinase ERK2	-1	0.7933	0.2067
Asn0057	IC50	MAP kinase ERK1	-1	0.81	0.19
Asn0057	Ki	MAP kinase ERK1	-1	0.7633	0.2367
Asn0057	IC50	MAP kinase ERK2	-1	0.72	0.28
Asn0057	Ki	MAP kinase ERK2	-1	0.66	0.34
Asn0058	IC50	MAP kinase ERK1	-1	0.79	0.21
Asn0058	Ki	MAP kinase ERK1	-1	0.95	0.05
Asn0058	IC50	MAP kinase ERK2	-1	0.64	0.36
Asn0058	Ki	MAP kinase ERK2	-1	0.92	0.08
Asn0059	IC50	MAP kinase ERK1	-1	0.84	0.16
Asn0059	Ki	MAP kinase ERK1	-1	0.87	0.13
Asn0059	IC50	MAP kinase ERK2	-1	0.7733	0.2267
Asn0059	Ki	MAP kinase ERK2	-1	0.8083	0.1917
Asn0060	IC50	MAP kinase ERK1	-1	0.84	0.16
Asn0060	Ki	MAP kinase ERK1	-1	0.89	0.11
Asn0060	IC50	MAP kinase ERK2	-1	0.6	0.4
Asn0060	Ki	MAP kinase ERK2	-1	0.72	0.28
Asn0061	IC50	MAP kinase ERK1	-1	0.92	0.08
Asn0061	Ki	MAP kinase ERK1	-1	1	0
Asn0061	IC50	MAP kinase ERK2	-1	0.88	0.12
Asn0061	Ki	MAP kinase ERK2	-1	0.97	0.03
Asn0062	IC50	MAP kinase ERK1	-1	0.9	0.1
Asn0062	Ki	MAP kinase ERK1	-1	0.95	0.05
Asn0062	IC50	MAP kinase ERK2	-1	0.88	0.12
Asn0062	Ki	MAP kinase ERK2	-1	0.95	0.05
Asn0063	IC50	MAP kinase ERK1	-1	0.92	0.08
Asn0063	Ki	MAP kinase ERK1	-1	0.97	0.03
Asn0063	IC50	MAP kinase ERK2	-1	0.88	0.12
Asn0063	Ki	MAP kinase ERK2	-1	0.97	0.03
Asn0064	IC50	MAP kinase ERK1	-1	0.8	0.2
Asn0064	Ki	MAP kinase ERK1	-1	0.9133	0.0867
Asn0064	IC50	MAP kinase ERK2	-1	0.66	0.34
Asn0064	Ki	MAP kinase ERK2	-1	0.88	0.12
Asn0065	IC50	MAP kinase ERK1	-1	0.87	0.13
Asn0065	Ki	MAP kinase ERK1	-1	0.94	0.06
Asn0065	IC50	MAP kinase ERK2	-1	0.8133	0.1867
Asn0065	Ki	MAP kinase ERK2	-1	0.9133	0.0867
Asn0066	IC50	MAP kinase ERK1	-1	0.96	0.04
Asn0066	Ki	MAP kinase ERK1	-1	0.95	0.05
Asn0066	IC50	MAP kinase ERK2	-1	0.9733	0.0267
Asn0066	Ki	MAP kinase ERK2	-1	0.97	0.03
Asn0067	IC50	MAP kinase ERK1	-1	0.5525	0.4475
Asn0067	Ki	MAP kinase ERK1	-1	0.6647	0.3353
Asn0067	IC50	MAP kinase ERK2	-1	0.53	0.47
Asn0067	Ki	MAP kinase ERK2	-1	0.6467	0.3533
Asn0068	IC50	MAP kinase ERK1	-1	0.7467	0.2533
Asn0068	Ki	MAP kinase ERK1	-1	0.91	0.09
Asn0068	IC50	MAP kinase ERK2	-1	0.5167	0.4833
Asn0068	Ki	MAP kinase ERK2	-1	0.85	0.15
Asn0069	IC50	MAP kinase ERK1	-1	0.93	0.07
Asn0069	Ki	MAP kinase ERK1	-1	0.93	0.07
Asn0069	IC50	MAP kinase ERK2	-1	0.85	0.15
Asn0069	Ki	MAP kinase ERK2	-1	0.9067	0.0933
Asn0070	IC50	MAP kinase ERK1	-1	0.91	0.09
Asn0070	Ki	MAP kinase ERK1	-1	0.97	0.03
Asn0070	IC50	MAP kinase ERK2	-1	0.835	0.165
Asn0070	Ki	MAP kinase ERK2	-1	0.91	0.09
Asn0071	IC50	MAP kinase ERK1	-1	0.93	0.07
Asn0071	Ki	MAP kinase ERK1	-1	0.98	0.02
Asn0071	IC50	MAP kinase ERK2	-1	0.92	0.08
Asn0071	Ki	MAP kinase ERK2	-1	0.92	0.08
Asn0072	IC50	MAP kinase ERK1	-1	0.92	0.08
Asn0072	Ki	MAP kinase ERK1	-1	0.99	0.01
Asn0072	IC50	MAP kinase ERK2	-1	0.875	0.125
Asn0072	Ki	MAP kinase ERK2	-1	0.98	0.02
Asn0073	IC50	MAP kinase ERK1	-1	0.66	0.34
Asn0073	Ki	MAP kinase ERK1	-1	0.88	0.12
Asn0073	IC50	MAP kinase ERK2	-1	0.79	0.21
Asn0073	Ki	MAP kinase ERK2	1	0.486	0.514
Asn0074	IC50	MAP kinase ERK1	-1	0.89	0.11
Asn0074	Ki	MAP kinase ERK1	-1	0.99	0.01
Asn0074	IC50	MAP kinase ERK2	-1	0.84	0.16
Asn0074	Ki	MAP kinase ERK2	-1	0.96	0.04
Asn0075	IC50	MAP kinase ERK1	-1	0.82	0.18
Asn0075	Ki	MAP kinase ERK1	-1	0.95	0.05
Asn0075	IC50	MAP kinase ERK2	-1	0.73	0.27
Asn0075	Ki	MAP kinase ERK2	-1	0.9	0.1
Asn0076	IC50	MAP kinase ERK1	-1	0.8467	0.1533
Asn0076	Ki	MAP kinase ERK1	-1	0.9325	0.0675
Asn0076	IC50	MAP kinase ERK2	-1	0.8367	0.1633
Asn0076	Ki	MAP kinase ERK2	-1	0.9175	0.0825
Asn0077	IC50	MAP kinase ERK1	-1	0.81	0.19
Asn0077	Ki	MAP kinase ERK1	-1	0.86	0.14
Asn0077	IC50	MAP kinase ERK2	-1	0.83	0.17
Asn0077	Ki	MAP kinase ERK2	-1	0.85	0.15
Asn0078	IC50	MAP kinase ERK1	-1	0.84	0.16
Asn0078	Ki	MAP kinase ERK1	-1	0.9	0.1
Asn0078	IC50	MAP kinase ERK2	-1	0.84	0.16
Asn0078	Ki	MAP kinase ERK2	-1	0.87	0.13
Asn0079	IC50	MAP kinase ERK1	-1	0.76	0.24
Asn0079	Ki	MAP kinase ERK1	-1	0.9	0.1
Asn0079	IC50	MAP kinase ERK2	-1	0.71	0.29
Asn0079	Ki	MAP kinase ERK2	-1	0.85	0.15
Asn0080	IC50	MAP kinase ERK1	-1	0.69	0.31
Asn0080	Ki	MAP kinase ERK1	-1	0.89	0.11
Asn0080	IC50	MAP kinase ERK2	-1	0.56	0.44
Asn0080	Ki	MAP kinase ERK2	-1	0.83	0.17
Asn0081	IC50	MAP kinase ERK1	-1	0.89	0.11
Asn0081	Ki	MAP kinase ERK1	-1	0.94	0.06
Asn0081	IC50	MAP kinase ERK2	-1	0.86	0.14
Asn0081	Ki	MAP kinase ERK2	-1	0.94	0.06
Asn0082	IC50	MAP kinase ERK1	-1	0.91	0.09
Asn0082	Ki	MAP kinase ERK1	-1	0.975	0.025
Asn0082	IC50	MAP kinase ERK2	-1	0.82	0.18
Asn0082	Ki	MAP kinase ERK2	-1	0.955	0.045
Asn0083	IC50	MAP kinase ERK1	-1	0.91	0.09
Asn0083	Ki	MAP kinase ERK1	-1	0.985	0.015
Asn0083	IC50	MAP kinase ERK2	-1	0.81	0.19
Asn0083	Ki	MAP kinase ERK2	-1	0.9583	0.0417
Asn0084	IC50	MAP kinase ERK1	-1	0.83	0.17
Asn0084	Ki	MAP kinase ERK1	-1	0.98	0.02
Asn0084	IC50	MAP kinase ERK2	-1	0.74	0.26
Asn0084	Ki	MAP kinase ERK2	-1	0.92	0.08
Asn0085	IC50	MAP kinase ERK1	-1	0.94	0.06
Asn0085	Ki	MAP kinase ERK1	-1	1	0
Asn0085	IC50	MAP kinase ERK2	-1	0.91	0.09
Asn0085	Ki	MAP kinase ERK2	-1	0.99	0.01
Asn0086	IC50	MAP kinase ERK1	-1	0.95	0.05
Asn0086	Ki	MAP kinase ERK1	-1	1	0
Asn0086	IC50	MAP kinase ERK2	-1	0.91	0.09
Asn0086	Ki	MAP kinase ERK2	-1	1	0
Asn0087	IC50	MAP kinase ERK1	-1	0.96	0.04
Asn0087	Ki	MAP kinase ERK1	-1	0.99	0.01
Asn0087	IC50	MAP kinase ERK2	-1	0.91	0.09
Asn0087	Ki	MAP kinase ERK2	-1	0.98	0.02
Asn0088	IC50	MAP kinase ERK1	-1	0.84	0.16
Asn0088	Ki	MAP kinase ERK1	-1	0.95	0.05
Asn0088	IC50	MAP kinase ERK2	-1	0.75	0.25
Asn0088	Ki	MAP kinase ERK2	-1	0.92	0.08
Asn0089	IC50	MAP kinase ERK1	-1	0.83	0.17
Asn0089	Ki	MAP kinase ERK1	-1	0.93	0.07
Asn0089	IC50	MAP kinase ERK2	-1	0.73	0.27
Asn0089	Ki	MAP kinase ERK2	-1	0.9	0.1
Asn0090	IC50	MAP kinase ERK1	-1	0.98	0.02
Asn0090	Ki	MAP kinase ERK1	-1	1	0
Asn0090	IC50	MAP kinase ERK2	-1	0.95	0.05
Asn0090	Ki	MAP kinase ERK2	-1	1	0
Asn0091	IC50	MAP kinase ERK1	-1	0.9175	0.0825
Asn0091	Ki	MAP kinase ERK1	-1	0.98	0.02
Asn0091	IC50	MAP kinase ERK2	-1	0.83	0.17
Asn0091	Ki	MAP kinase ERK2	-1	0.93	0.07
Asn0092	IC50	MAP kinase ERK1	-1	0.89	0.11
Asn0092	Ki	MAP kinase ERK1	-1	0.99	0.01
Asn0092	IC50	MAP kinase ERK2	-1	0.77	0.23
Asn0092	Ki	MAP kinase ERK2	-1	0.91	0.09
Asn0093	IC50	MAP kinase ERK1	-1	0.98	0.02
Asn0093	Ki	MAP kinase ERK1	-1	0.99	0.01
Asn0093	IC50	MAP kinase ERK2	-1	0.94	0.06
Asn0093	Ki	MAP kinase ERK2	-1	0.98	0.02
Asn0094	IC50	MAP kinase ERK1	-1	0.9	0.1
Asn0094	Ki	MAP kinase ERK1	-1	0.98	0.02
Asn0094	IC50	MAP kinase ERK2	-1	0.83	0.17
Asn0094	Ki	MAP kinase ERK2	-1	0.95	0.05
Asn0095	IC50	MAP kinase ERK1	-1	0.92	0.08
Asn0095	Ki	MAP kinase ERK1	-1	0.93	0.07
Asn0095	IC50	MAP kinase ERK2	-1	0.85	0.15
Asn0095	Ki	MAP kinase ERK2	-1	0.86	0.14
Asn0096	IC50	MAP kinase ERK1	-1	0.91	0.09
Asn0096	Ki	MAP kinase ERK1	-1	0.91	0.09
Asn0096	IC50	MAP kinase ERK2	-1	0.81	0.19
Asn0096	Ki	MAP kinase ERK2	-1	0.83	0.17
Asn0097	IC50	MAP kinase ERK1	-1	0.92	0.08
Asn0097	Ki	MAP kinase ERK1	-1	0.91	0.09
Asn0097	IC50	MAP kinase ERK2	-1	0.85	0.15
Asn0097	Ki	MAP kinase ERK2	-1	0.84	0.16
Asn0098	IC50	MAP kinase ERK1	-1	0.85	0.15
Asn0098	Ki	MAP kinase ERK1	-1	0.92	0.08
Asn0098	IC50	MAP kinase ERK2	-1	0.76	0.24
Asn0098	Ki	MAP kinase ERK2	-1	0.83	0.17
Asn0099	IC50	MAP kinase ERK1	-1	0.74	0.26
Asn0099	Ki	MAP kinase ERK1	-1	0.8	0.2
Asn0099	IC50	MAP kinase ERK2	-1	0.6575	0.3425
Asn0099	Ki	MAP kinase ERK2	-1	0.6525	0.3475
Asn0100	IC50	MAP kinase ERK1	-1	0.77	0.23
Asn0100	Ki	MAP kinase ERK1	-1	0.815	0.185
Asn0100	IC50	MAP kinase ERK2	-1	0.5975	0.4025
Asn0100	Ki	MAP kinase ERK2	-1	0.6633	0.3367
Asn0101	IC50	MAP kinase ERK1	-1	0.82	0.18
Asn0101	Ki	MAP kinase ERK1	-1	0.94	0.06
Asn0101	IC50	MAP kinase ERK2	-1	0.66	0.34
Asn0101	Ki	MAP kinase ERK2	-1	0.864	0.136
Asn0102	IC50	MAP kinase ERK1	-1	0.76	0.24
Asn0102	Ki	MAP kinase ERK1	-1	0.82	0.18
Asn0102	IC50	MAP kinase ERK2	-1	0.6325	0.3675
Asn0102	Ki	MAP kinase ERK2	-1	0.625	0.375
Asn0103	IC50	MAP kinase ERK1	-1	0.91	0.09
Asn0103	Ki	MAP kinase ERK1	-1	0.96	0.04
Asn0103	IC50	MAP kinase ERK2	-1	0.7933	0.2067
Asn0103	Ki	MAP kinase ERK2	-1	0.91	0.09
Asn0104	IC50	MAP kinase ERK1	-1	0.8	0.2
Asn0104	Ki	MAP kinase ERK1	-1	0.95	0.05
Asn0104	IC50	MAP kinase ERK2	-1	0.59	0.41
Asn0104	Ki	MAP kinase ERK2	-1	0.8833	0.1167
Asn0105	IC50	MAP kinase ERK1	-1	0.9	0.1
Asn0105	Ki	MAP kinase ERK1	-1	0.95	0.05
Asn0105	IC50	MAP kinase ERK2	-1	0.7833	0.2167
Asn0105	Ki	MAP kinase ERK2	-1	0.91	0.09
Asn0106	IC50	MAP kinase ERK1	-1	0.89	0.11
Asn0106	Ki	MAP kinase ERK1	-1	0.95	0.05
Asn0106	IC50	MAP kinase ERK2	-1	0.75	0.25
Asn0106	Ki	MAP kinase ERK2	-1	0.87	0.13
Asn0107	IC50	MAP kinase ERK1	-1	0.685	0.315
Asn0107	Ki	MAP kinase ERK1	-1	0.7625	0.2375
Asn0107	IC50	MAP kinase ERK2	-1	0.6325	0.3675
Asn0107	Ki	MAP kinase ERK2	-1	0.6475	0.3525
Asn0108	IC50	MAP kinase ERK1	-1	0.715	0.285
Asn0108	Ki	MAP kinase ERK1	-1	0.82	0.18
Asn0108	IC50	MAP kinase ERK2	-1	0.6	0.4
Asn0108	Ki	MAP kinase ERK2	-1	0.745	0.255
Asn0109	IC50	MAP kinase ERK1	-1	0.71	0.29
Asn0109	Ki	MAP kinase ERK1	-1	0.85	0.15
Asn0109	IC50	MAP kinase ERK2	-1	0.65	0.35
Asn0109	Ki	MAP kinase ERK2	1	0.48	0.52
Asn0110	IC50	MAP kinase ERK1	-1	0.635	0.365
Asn0110	Ki	MAP kinase ERK1	-1	0.755	0.245
Asn0110	IC50	MAP kinase ERK2	-1	0.6025	0.3975
Asn0110	Ki	MAP kinase ERK2	-1	0.635	0.365
Asn0111	IC50	MAP kinase ERK1	-1	0.96	0.04
Asn0111	Ki	MAP kinase ERK1	-1	0.98	0.02
Asn0111	IC50	MAP kinase ERK2	-1	0.835	0.165
Asn0111	Ki	MAP kinase ERK2	-1	0.94	0.06
Asn0112	IC50	MAP kinase ERK1	-1	0.86	0.14
Asn0112	Ki	MAP kinase ERK1	-1	0.94	0.06
Asn0112	IC50	MAP kinase ERK2	-1	0.79	0.21
Asn0112	Ki	MAP kinase ERK2	-1	0.89	0.11
Asn0113	IC50	MAP kinase ERK1	-1	0.73	0.27
Asn0113	Ki	MAP kinase ERK1	-1	0.8433	0.1567
Asn0113	IC50	MAP kinase ERK2	-1	0.53	0.47
Asn0113	Ki	MAP kinase ERK2	-1	0.7333	0.2667
Asn0114	IC50	MAP kinase ERK1	-1	0.6825	0.3175
Asn0114	Ki	MAP kinase ERK1	-1	0.835	0.165
Asn0114	IC50	MAP kinase ERK2	-1	0.57	0.43
Asn0114	Ki	MAP kinase ERK2	-1	0.765	0.235
Asn0115	IC50	MAP kinase ERK1	-1	0.86	0.14
Asn0115	Ki	MAP kinase ERK1	-1	0.92	0.08
Asn0115	IC50	MAP kinase ERK2	-1	0.68	0.32
Asn0115	Ki	MAP kinase ERK2	-1	0.81	0.19
Asn0116	IC50	MAP kinase ERK1	-1	0.85	0.15
Asn0116	Ki	MAP kinase ERK1	-1	0.87	0.13
Asn0116	IC50	MAP kinase ERK2	-1	0.68	0.32
Asn0116	Ki	MAP kinase ERK2	-1	0.79	0.21
Asn0117	IC50	MAP kinase ERK1	-1	0.735	0.265
Asn0117	Ki	MAP kinase ERK1	-1	0.81	0.19
Asn0117	IC50	MAP kinase ERK2	-1	0.6275	0.3725
Asn0117	Ki	MAP kinase ERK2	-1	0.675	0.325
Asn0118	IC50	MAP kinase ERK1	-1	0.725	0.275
Asn0118	Ki	MAP kinase ERK1	-1	0.805	0.195
Asn0118	IC50	MAP kinase ERK2	-1	0.63	0.37
Asn0118	Ki	MAP kinase ERK2	-1	0.6883	0.3117
Asn0119	IC50	MAP kinase ERK1	-1	0.92	0.08
Asn0119	Ki	MAP kinase ERK1	-1	0.96	0.04
Asn0119	IC50	MAP kinase ERK2	-1	0.78	0.22
Asn0119	Ki	MAP kinase ERK2	-1	0.9333	0.0667
Asn0120	IC50	MAP kinase ERK1	-1	0.785	0.215
Asn0120	Ki	MAP kinase ERK1	-1	0.865	0.135
Asn0120	IC50	MAP kinase ERK2	-1	0.72	0.28
Asn0120	Ki	MAP kinase ERK2	-1	0.789	0.211
Asn0121	IC50	MAP kinase ERK1	-1	0.86	0.14
Asn0121	Ki	MAP kinase ERK1	-1	0.93	0.07
Asn0121	IC50	MAP kinase ERK2	-1	0.82	0.18
Asn0121	Ki	MAP kinase ERK2	-1	0.86	0.14
Asn0122	IC50	MAP kinase ERK1	-1	0.92	0.08
Asn0122	Ki	MAP kinase ERK1	-1	0.985	0.015
Asn0122	IC50	MAP kinase ERK2	-1	0.89	0.11
Asn0122	Ki	MAP kinase ERK2	-1	0.955	0.045
Asn0123	IC50	MAP kinase ERK1	-1	0.9	0.1
Asn0123	Ki	MAP kinase ERK1	-1	0.96	0.04
Asn0123	IC50	MAP kinase ERK2	-1	0.79	0.21
Asn0123	Ki	MAP kinase ERK2	-1	0.91	0.09
Asn0124	IC50	MAP kinase ERK1	-1	0.91	0.09
Asn0124	Ki	MAP kinase ERK1	-1	0.96	0.04
Asn0124	IC50	MAP kinase ERK2	-1	0.86	0.14
Asn0124	Ki	MAP kinase ERK2	-1	0.97	0.03
Asn0125	IC50	MAP kinase ERK1	-1	0.91	0.09
Asn0125	Ki	MAP kinase ERK1	-1	0.99	0.01
Asn0125	IC50	MAP kinase ERK2	-1	0.794	0.206
Asn0125	Ki	MAP kinase ERK2	-1	0.95	0.05
Asn0126	IC50	MAP kinase ERK1	-1	0.98	0.02
Asn0126	Ki	MAP kinase ERK1	-1	0.98	0.02
Asn0126	IC50	MAP kinase ERK2	-1	0.88	0.12
Asn0126	Ki	MAP kinase ERK2	-1	0.97	0.03
Asn0127	IC50	MAP kinase ERK1	-1	0.855	0.145
Asn0127	Ki	MAP kinase ERK1	-1	0.9083	0.0917
Asn0127	IC50	MAP kinase ERK2	-1	0.7275	0.2725
Asn0127	Ki	MAP kinase ERK2	-1	0.7533	0.2467
Asn0128	IC50	MAP kinase ERK1	-1	0.97	0.03
Asn0128	Ki	MAP kinase ERK1	-1	0.99	0.01
Asn0128	IC50	MAP kinase ERK2	-1	0.89	0.11
Asn0128	Ki	MAP kinase ERK2	-1	0.95	0.05
Asn0129	IC50	MAP kinase ERK1	-1	0.845	0.155
Asn0129	Ki	MAP kinase ERK1	-1	0.925	0.075
Asn0129	IC50	MAP kinase ERK2	-1	0.78	0.22
Asn0129	Ki	MAP kinase ERK2	-1	0.83	0.17
Asn0130	IC50	MAP kinase ERK1	-1	0.765	0.235
Asn0130	Ki	MAP kinase ERK1	-1	0.815	0.185
Asn0130	IC50	MAP kinase ERK2	-1	0.6575	0.3425
Asn0130	Ki	MAP kinase ERK2	-1	0.65	0.35
Asn0131	IC50	MAP kinase ERK1	-1	0.725	0.275
Asn0131	Ki	MAP kinase ERK1	-1	0.795	0.205
Asn0131	IC50	MAP kinase ERK2	-1	0.635	0.365
Asn0131	Ki	MAP kinase ERK2	-1	0.6523	0.3477
Asn0132	IC50	MAP kinase ERK1	-1	0.705	0.295
Asn0132	Ki	MAP kinase ERK1	-1	0.7225	0.2775
Asn0132	IC50	MAP kinase ERK2	-1	0.68	0.32
Asn0132	Ki	MAP kinase ERK2	-1	0.6075	0.3925
Asn0133	IC50	MAP kinase ERK1	-1	0.6733	0.3267
Asn0133	Ki	MAP kinase ERK1	-1	0.705	0.295
Asn0133	IC50	MAP kinase ERK2	-1	0.6383	0.3617
Asn0133	Ki	MAP kinase ERK2	-1	0.59	0.41
Asn0134	IC50	MAP kinase ERK1	-1	0.87	0.13
Asn0134	Ki	MAP kinase ERK1	-1	0.97	0.03
Asn0134	IC50	MAP kinase ERK2	-1	0.8033	0.1967
Asn0134	Ki	MAP kinase ERK2	-1	0.94	0.06
Asn0135	IC50	MAP kinase ERK1	-1	0.81	0.19
Asn0135	Ki	MAP kinase ERK1	-1	0.91	0.09
Asn0135	IC50	MAP kinase ERK2	-1	0.67	0.33
Asn0135	Ki	MAP kinase ERK2	-1	0.83	0.17
Asn0136	IC50	MAP kinase ERK1	-1	0.871	0.129
Asn0136	Ki	MAP kinase ERK1	-1	0.925	0.075
Asn0136	IC50	MAP kinase ERK2	-1	0.826	0.174
Asn0136	Ki	MAP kinase ERK2	-1	0.92	0.08
Asn0137	IC50	MAP kinase ERK1	-1	0.79	0.21
Asn0137	Ki	MAP kinase ERK1	-1	0.87	0.13
Asn0137	IC50	MAP kinase ERK2	-1	0.8	0.2
Asn0137	Ki	MAP kinase ERK2	-1	0.89	0.11
Asn0138	IC50	MAP kinase ERK1	-1	0.76	0.24
Asn0138	Ki	MAP kinase ERK1	-1	0.8133	0.1867
Asn0138	IC50	MAP kinase ERK2	-1	0.64	0.36
Asn0138	Ki	MAP kinase ERK2	-1	0.6808	0.3192
Asn0139	IC50	MAP kinase ERK1	-1	0.93	0.07
Asn0139	Ki	MAP kinase ERK1	-1	0.97	0.03
Asn0139	IC50	MAP kinase ERK2	-1	0.83	0.17
Asn0139	Ki	MAP kinase ERK2	-1	0.9	0.1
Asn0140	IC50	MAP kinase ERK1	-1	0.93	0.07
Asn0140	Ki	MAP kinase ERK1	-1	0.95	0.05
Asn0140	IC50	MAP kinase ERK2	-1	0.86	0.14
Asn0140	Ki	MAP kinase ERK2	-1	0.87	0.13
Asn0141	IC50	MAP kinase ERK1	-1	0.83	0.17
Asn0141	Ki	MAP kinase ERK1	-1	0.915	0.085
Asn0141	IC50	MAP kinase ERK2	-1	0.7375	0.2625
Asn0141	Ki	MAP kinase ERK2	-1	0.84	0.16
Asn0142	IC50	MAP kinase ERK1	-1	0.83	0.17
Asn0142	Ki	MAP kinase ERK1	-1	0.96	0.04
Asn0142	IC50	MAP kinase ERK2	-1	0.77	0.23
Asn0142	Ki	MAP kinase ERK2	-1	0.9	0.1
Asn0143	IC50	MAP kinase ERK1	-1	0.83	0.17
Asn0143	Ki	MAP kinase ERK1	-1	0.835	0.165
Asn0143	IC50	MAP kinase ERK2	-1	0.64	0.36
Asn0143	Ki	MAP kinase ERK2	-1	0.725	0.275
Asn0144	IC50	MAP kinase ERK1	-1	0.75	0.25
Asn0144	Ki	MAP kinase ERK1	-1	0.81	0.19
Asn0144	IC50	MAP kinase ERK2	-1	0.72	0.28
Asn0144	Ki	MAP kinase ERK2	-1	0.7867	0.2133
Asn0145	IC50	MAP kinase ERK1	-1	0.88	0.12
Asn0145	Ki	MAP kinase ERK1	-1	0.9	0.1
Asn0145	IC50	MAP kinase ERK2	-1	0.7975	0.2025
Asn0145	Ki	MAP kinase ERK2	-1	0.81	0.19
Asn0146	IC50	MAP kinase ERK1	-1	0.76	0.24
Asn0146	Ki	MAP kinase ERK1	-1	0.87	0.13
Asn0146	IC50	MAP kinase ERK2	-1	0.6017	0.3983
Asn0146	Ki	MAP kinase ERK2	-1	0.79	0.21
Asn0147	IC50	MAP kinase ERK1	-1	0.89	0.11
Asn0147	Ki	MAP kinase ERK1	-1	0.97	0.03
Asn0147	IC50	MAP kinase ERK2	-1	0.9	0.1
Asn0147	Ki	MAP kinase ERK2	-1	0.98	0.02
Asn0148	IC50	MAP kinase ERK1	-1	0.755	0.245
Asn0148	Ki	MAP kinase ERK1	-1	0.905	0.095
Asn0148	IC50	MAP kinase ERK2	-1	0.635	0.365
Asn0148	Ki	MAP kinase ERK2	-1	0.835	0.165
Asn0149	IC50	MAP kinase ERK1	-1	0.5233	0.4767
Asn0149	Ki	MAP kinase ERK1	-1	0.5667	0.4333
Asn0149	IC50	MAP kinase ERK2	-1	0.5317	0.4683
Asn0149	Ki	MAP kinase ERK2	1	0.46	0.54
Asn0150	IC50	MAP kinase ERK1	-1	0.77	0.23
Asn0150	Ki	MAP kinase ERK1	-1	0.83	0.17
Asn0150	IC50	MAP kinase ERK2	-1	0.66	0.34
Asn0150	Ki	MAP kinase ERK2	-1	0.7383	0.2617
Asn0151	IC50	MAP kinase ERK1	-1	0.83	0.17
Asn0151	Ki	MAP kinase ERK1	-1	0.96	0.04
Asn0151	IC50	MAP kinase ERK2	-1	0.684	0.316
Asn0151	Ki	MAP kinase ERK2	-1	0.934	0.066
Asn0152	IC50	MAP kinase ERK1	-1	0.76	0.24
Asn0152	Ki	MAP kinase ERK1	-1	0.92	0.08
Asn0152	IC50	MAP kinase ERK2	-1	0.57	0.43
Asn0152	Ki	MAP kinase ERK2	-1	0.834	0.166
Asn0153	IC50	MAP kinase ERK1	-1	0.745	0.255
Asn0153	Ki	MAP kinase ERK1	-1	0.7067	0.2933
Asn0153	IC50	MAP kinase ERK2	-1	0.78	0.22
Asn0153	Ki	MAP kinase ERK2	-1	0.8367	0.1633
Asn0154	IC50	MAP kinase ERK1	-1	0.86	0.14
Asn0154	Ki	MAP kinase ERK1	-1	0.89	0.11
Asn0154	IC50	MAP kinase ERK2	-1	0.8467	0.1533
Asn0154	Ki	MAP kinase ERK2	-1	0.8967	0.1033
Asn0155	IC50	MAP kinase ERK1	-1	0.8225	0.1775
Asn0155	Ki	MAP kinase ERK1	-1	0.94	0.06
Asn0155	IC50	MAP kinase ERK2	-1	0.75	0.25
Asn0155	Ki	MAP kinase ERK2	-1	0.91	0.09
Asn0156	IC50	MAP kinase ERK1	-1	0.9	0.1
Asn0156	Ki	MAP kinase ERK1	-1	0.98	0.02
Asn0156	IC50	MAP kinase ERK2	-1	0.86	0.14
Asn0156	Ki	MAP kinase ERK2	-1	0.97	0.03
Asn0157	IC50	MAP kinase ERK1	-1	0.925	0.075
Asn0157	Ki	MAP kinase ERK1	-1	0.96	0.04
Asn0157	IC50	MAP kinase ERK2	-1	0.91	0.09
Asn0157	Ki	MAP kinase ERK2	-1	0.95	0.05
Asn0158	IC50	MAP kinase ERK1	-1	0.82	0.18
Asn0158	Ki	MAP kinase ERK1	-1	0.91	0.09
Asn0158	IC50	MAP kinase ERK2	-1	0.78	0.22
Asn0158	Ki	MAP kinase ERK2	-1	0.89	0.11
Asn0159	IC50	MAP kinase ERK1	-1	0.92	0.08
Asn0159	Ki	MAP kinase ERK1	-1	0.91	0.09
Asn0159	IC50	MAP kinase ERK2	-1	0.85	0.15
Asn0159	Ki	MAP kinase ERK2	-1	0.88	0.12
Asn0160	IC50	MAP kinase ERK1	-1	0.705	0.295
Asn0160	Ki	MAP kinase ERK1	-1	0.765	0.235
Asn0160	IC50	MAP kinase ERK2	-1	0.6775	0.3225
Asn0160	Ki	MAP kinase ERK2	-1	0.61	0.39
Asn0161	IC50	MAP kinase ERK1	-1	0.63	0.37
Asn0161	Ki	MAP kinase ERK1	-1	0.765	0.235
Asn0161	IC50	MAP kinase ERK2	-1	0.5775	0.4225
Asn0161	Ki	MAP kinase ERK2	-1	0.65	0.35
Asn0162	IC50	MAP kinase ERK1	-1	0.88	0.12
Asn0162	Ki	MAP kinase ERK1	-1	0.95	0.05
Asn0162	IC50	MAP kinase ERK2	-1	0.87	0.13
Asn0162	Ki	MAP kinase ERK2	-1	0.95	0.05
Asn0163	IC50	MAP kinase ERK1	-1	0.8	0.2
Asn0163	Ki	MAP kinase ERK1	-1	0.8543	0.1457
Asn0163	IC50	MAP kinase ERK2	-1	0.71	0.29
Asn0163	Ki	MAP kinase ERK2	-1	0.7243	0.2757
Asn0164	IC50	MAP kinase ERK1	-1	0.875	0.125
Asn0164	Ki	MAP kinase ERK1	-1	0.94	0.06
Asn0164	IC50	MAP kinase ERK2	-1	0.785	0.215
Asn0164	Ki	MAP kinase ERK2	-1	0.88	0.12
Asn0165	IC50	MAP kinase ERK1	-1	0.81	0.19
Asn0165	Ki	MAP kinase ERK1	-1	0.945	0.055
Asn0165	IC50	MAP kinase ERK2	-1	0.6925	0.3075
Asn0165	Ki	MAP kinase ERK2	-1	0.935	0.065
Asn0166	IC50	MAP kinase ERK1	-1	1	0
Asn0166	Ki	MAP kinase ERK1	-1	1	0
Asn0166	IC50	MAP kinase ERK2	-1	0.99	0.01
Asn0166	Ki	MAP kinase ERK2	-1	1	0
Asn0167	IC50	MAP kinase ERK1	-1	0.88	0.12
Asn0167	Ki	MAP kinase ERK1	-1	0.98	0.02
Asn0167	IC50	MAP kinase ERK2	-1	0.84	0.16
Asn0167	Ki	MAP kinase ERK2	-1	0.97	0.03
Asn0168	IC50	MAP kinase ERK1	-1	0.95	0.05
Asn0168	Ki	MAP kinase ERK1	-1	0.99	0.01
Asn0168	IC50	MAP kinase ERK2	-1	0.93	0.07
Asn0168	Ki	MAP kinase ERK2	-1	0.99	0.01
Asn0169	IC50	MAP kinase ERK1	-1	0.9	0.1
Asn0169	Ki	MAP kinase ERK1	-1	0.975	0.025
Asn0169	IC50	MAP kinase ERK2	-1	0.87	0.13
Asn0169	Ki	MAP kinase ERK2	-1	0.965	0.035
Asn0170	IC50	MAP kinase ERK1	-1	0.97	0.03
Asn0170	Ki	MAP kinase ERK1	-1	0.97	0.03
Asn0170	IC50	MAP kinase ERK2	-1	0.89	0.11
Asn0170	Ki	MAP kinase ERK2	-1	0.965	0.035
Asn0171	IC50	MAP kinase ERK1	-1	0.9083	0.0917
Asn0171	Ki	MAP kinase ERK1	-1	0.99	0.01
Asn0171	IC50	MAP kinase ERK2	-1	0.8983	0.1017
Asn0171	Ki	MAP kinase ERK2	-1	0.99	0.01
Asn0172	IC50	MAP kinase ERK1	-1	0.8942	0.1058
Asn0172	Ki	MAP kinase ERK1	-1	0.95	0.05
Asn0172	IC50	MAP kinase ERK2	-1	0.8667	0.1333
Asn0172	Ki	MAP kinase ERK2	-1	0.9533	0.0467
Asn0173	IC50	MAP kinase ERK1	-1	0.975	0.025
Asn0173	Ki	MAP kinase ERK1	-1	0.975	0.025
Asn0173	IC50	MAP kinase ERK2	-1	0.951	0.049
Asn0173	Ki	MAP kinase ERK2	-1	0.9525	0.0475
Asn0174	IC50	MAP kinase ERK1	-1	0.67	0.33
Asn0174	Ki	MAP kinase ERK1	-1	0.77	0.23
Asn0174	IC50	MAP kinase ERK2	-1	0.5567	0.4433
Asn0174	Ki	MAP kinase ERK2	1	0.37	0.63
Asn0175	IC50	MAP kinase ERK1	-1	0.88	0.12
Asn0175	Ki	MAP kinase ERK1	-1	0.97	0.03
Asn0175	IC50	MAP kinase ERK2	-1	0.77	0.23
Asn0175	Ki	MAP kinase ERK2	-1	0.91	0.09
Asn0176	IC50	MAP kinase ERK1	-1	0.9433	0.0567
Asn0176	Ki	MAP kinase ERK1	-1	1	0
Asn0176	IC50	MAP kinase ERK2	-1	0.9133	0.0867
Asn0176	Ki	MAP kinase ERK2	-1	0.99	0.01
Asn0177	IC50	MAP kinase ERK1	-1	0.95	0.05
Asn0177	Ki	MAP kinase ERK1	-1	0.99	0.01
Asn0177	IC50	MAP kinase ERK2	-1	0.93	0.07
Asn0177	Ki	MAP kinase ERK2	-1	0.98	0.02
Asn0178	IC50	MAP kinase ERK1	-1	0.94	0.06
Asn0178	Ki	MAP kinase ERK1	-1	0.99	0.01
Asn0178	IC50	MAP kinase ERK2	-1	0.92	0.08
Asn0178	Ki	MAP kinase ERK2	-1	0.98	0.02
Asn0179	IC50	MAP kinase ERK1	-1	0.97	0.03
Asn0179	Ki	MAP kinase ERK1	-1	0.99	0.01
Asn0179	IC50	MAP kinase ERK2	-1	0.93	0.07
Asn0179	Ki	MAP kinase ERK2	-1	0.96	0.04
Asn0180	IC50	MAP kinase ERK1	-1	0.94	0.06
Asn0180	Ki	MAP kinase ERK1	-1	0.95	0.05
Asn0180	IC50	MAP kinase ERK2	-1	0.88	0.12
Asn0180	Ki	MAP kinase ERK2	-1	0.9	0.1
Asn0181	IC50	MAP kinase ERK1	-1	0.8267	0.1733
Asn0181	Ki	MAP kinase ERK1	-1	0.945	0.055
Asn0181	IC50	MAP kinase ERK2	-1	0.7492	0.2508
Asn0181	Ki	MAP kinase ERK2	-1	0.915	0.085
Asn0182	IC50	MAP kinase ERK1	-1	0.72	0.28
Asn0182	Ki	MAP kinase ERK1	-1	0.875	0.125
Asn0182	IC50	MAP kinase ERK2	-1	0.72	0.28
Asn0182	Ki	MAP kinase ERK2	-1	0.805	0.195
Asn0183	IC50	MAP kinase ERK1	-1	0.67	0.33
Asn0183	Ki	MAP kinase ERK1	-1	0.96	0.04
Asn0183	IC50	MAP kinase ERK2	-1	0.59	0.41
Asn0183	Ki	MAP kinase ERK2	-1	0.9	0.1
Asn0184	IC50	MAP kinase ERK1	-1	0.92	0.08
Asn0184	Ki	MAP kinase ERK1	-1	0.89	0.11
Asn0184	IC50	MAP kinase ERK2	-1	0.86	0.14
Asn0184	Ki	MAP kinase ERK2	-1	0.88	0.12
Asn0185	IC50	MAP kinase ERK1	-1	0.8433	0.1567
Asn0185	Ki	MAP kinase ERK1	-1	0.9133	0.0867
Asn0185	IC50	MAP kinase ERK2	-1	0.7583	0.2417
Asn0185	Ki	MAP kinase ERK2	-1	0.9033	0.0967
Asn0186	IC50	MAP kinase ERK1	-1	0.94	0.06
Asn0186	Ki	MAP kinase ERK1	-1	0.98	0.02
Asn0186	IC50	MAP kinase ERK2	-1	0.88	0.12
Asn0186	Ki	MAP kinase ERK2	-1	0.9033	0.0967
Asn0187	IC50	MAP kinase ERK1	-1	0.85	0.15
Asn0187	Ki	MAP kinase ERK1	-1	0.92	0.08
Asn0187	IC50	MAP kinase ERK2	-1	0.645	0.355
Asn0187	Ki	MAP kinase ERK2	-1	0.8	0.2
Asn0188	IC50	MAP kinase ERK1	-1	0.84	0.16
Asn0188	Ki	MAP kinase ERK1	-1	0.89	0.11
Asn0188	IC50	MAP kinase ERK2	-1	0.635	0.365
Asn0188	Ki	MAP kinase ERK2	-1	0.77	0.23
Asn0189	IC50	MAP kinase ERK1	-1	0.6	0.4
Asn0189	Ki	MAP kinase ERK1	-1	0.87	0.13
Asn0189	IC50	MAP kinase ERK2	-1	0.81	0.19
Asn0189	Ki	MAP kinase ERK2	1	0.46	0.54
Asn0190	IC50	MAP kinase ERK1	-1	0.72	0.28
Asn0190	Ki	MAP kinase ERK1	-1	0.8967	0.1033
Asn0190	IC50	MAP kinase ERK2	-1	0.73	0.27
Asn0190	Ki	MAP kinase ERK2	-1	0.8367	0.1633
Asn0191	IC50	MAP kinase ERK1	-1	0.87	0.13
Asn0191	Ki	MAP kinase ERK1	-1	0.88	0.12
Asn0191	IC50	MAP kinase ERK2	-1	0.67	0.33
Asn0191	Ki	MAP kinase ERK2	-1	0.73	0.27
Asn0192	IC50	MAP kinase ERK1	-1	0.88	0.12
Asn0192	Ki	MAP kinase ERK1	-1	0.81	0.19
Asn0192	IC50	MAP kinase ERK2	-1	0.76	0.24
Asn0192	Ki	MAP kinase ERK2	-1	0.7267	0.2733
Asn0193	IC50	MAP kinase ERK1	-1	0.775	0.225
Asn0193	Ki	MAP kinase ERK1	-1	0.86	0.14
Asn0193	IC50	MAP kinase ERK2	-1	0.674	0.326
Asn0193	Ki	MAP kinase ERK2	-1	0.835	0.165
Asn0194	IC50	MAP kinase ERK1	-1	0.715	0.285
Asn0194	Ki	MAP kinase ERK1	-1	0.88	0.12
Asn0194	IC50	MAP kinase ERK2	-1	0.599	0.401
Asn0194	Ki	MAP kinase ERK2	-1	0.82	0.18
Asn0195	IC50	MAP kinase ERK1	-1	0.72	0.28
Asn0195	Ki	MAP kinase ERK1	-1	0.88	0.12
Asn0195	IC50	MAP kinase ERK2	-1	0.66	0.34
Asn0195	Ki	MAP kinase ERK2	-1	0.89	0.11
Asn0196	IC50	MAP kinase ERK1	-1	0.68	0.32
Asn0196	Ki	MAP kinase ERK1	-1	0.84	0.16
Asn0196	IC50	MAP kinase ERK2	-1	0.69	0.31
Asn0196	Ki	MAP kinase ERK2	-1	0.82	0.18
Asn0197	IC50	MAP kinase ERK1	-1	0.62	0.38
Asn0197	Ki	MAP kinase ERK1	-1	0.88	0.12
Asn0197	IC50	MAP kinase ERK2	-1	0.51	0.49
Asn0197	Ki	MAP kinase ERK2	-1	0.82	0.18
Asn0198	IC50	MAP kinase ERK1	-1	0.93	0.07
Asn0198	Ki	MAP kinase ERK1	-1	0.9	0.1
Asn0198	IC50	MAP kinase ERK2	-1	0.84	0.16
Asn0198	Ki	MAP kinase ERK2	-1	0.795	0.205
Asn0199	IC50	MAP kinase ERK1	-1	0.68	0.32
Asn0199	Ki	MAP kinase ERK1	-1	0.82	0.18
Asn0199	IC50	MAP kinase ERK2	-1	0.53	0.47
Asn0199	Ki	MAP kinase ERK2	-1	0.75	0.25
Asn0200	IC50	MAP kinase ERK1	-1	0.83	0.17
Asn0200	Ki	MAP kinase ERK1	-1	0.83	0.17
Asn0200	IC50	MAP kinase ERK2	-1	0.71	0.29
Asn0200	Ki	MAP kinase ERK2	-1	0.74	0.26
Asn0201	IC50	MAP kinase ERK1	-1	0.84	0.16
Asn0201	Ki	MAP kinase ERK1	-1	0.84	0.16
Asn0201	IC50	MAP kinase ERK2	-1	0.72	0.28
Asn0201	Ki	MAP kinase ERK2	-1	0.72	0.28
Asn0202	IC50	MAP kinase ERK1	-1	0.66	0.34
Asn0202	Ki	MAP kinase ERK1	-1	0.9	0.1
Asn0202	IC50	MAP kinase ERK2	-1	0.53	0.47
Asn0202	Ki	MAP kinase ERK2	-1	0.7967	0.2033
Asn0203	IC50	MAP kinase ERK1	-1	0.94	0.06
Asn0203	Ki	MAP kinase ERK1	-1	0.98	0.02
Asn0203	IC50	MAP kinase ERK2	-1	0.8567	0.1433
Asn0203	Ki	MAP kinase ERK2	-1	0.98	0.02
Asn0204	IC50	MAP kinase ERK1	-1	0.95	0.05
Asn0204	Ki	MAP kinase ERK1	-1	0.98	0.02
Asn0204	IC50	MAP kinase ERK2	-1	0.89	0.11
Asn0204	Ki	MAP kinase ERK2	-1	0.98	0.02
Asn0205	IC50	MAP kinase ERK1	-1	0.66	0.34
Asn0205	Ki	MAP kinase ERK1	-1	0.89	0.11
Asn0205	IC50	MAP kinase ERK2	-1	0.58	0.42
Asn0205	Ki	MAP kinase ERK2	-1	0.83	0.17
Asn0206	IC50	MAP kinase ERK1	-1	0.58	0.42
Asn0206	Ki	MAP kinase ERK1	-1	0.7133	0.2867
Asn0206	IC50	MAP kinase ERK2	-1	0.56	0.44
Asn0206	Ki	MAP kinase ERK2	1	0.25	0.75
Asn0207	IC50	MAP kinase ERK1	-1	0.77	0.23
Asn0207	Ki	MAP kinase ERK1	-1	0.89	0.11
Asn0207	IC50	MAP kinase ERK2	-1	0.71	0.29
Asn0207	Ki	MAP kinase ERK2	-1	0.82	0.18
Asn0208	IC50	MAP kinase ERK1	-1	0.7033	0.2967
Asn0208	Ki	MAP kinase ERK1	-1	0.91	0.09
Asn0208	IC50	MAP kinase ERK2	-1	0.79	0.21
Asn0208	Ki	MAP kinase ERK2	1	0.4924	0.5076
Asn0209	IC50	MAP kinase ERK1	-1	0.77	0.23
Asn0209	Ki	MAP kinase ERK1	-1	0.89	0.11
Asn0209	IC50	MAP kinase ERK2	-1	0.72	0.28
Asn0209	Ki	MAP kinase ERK2	-1	0.83	0.17
Asn0210	IC50	MAP kinase ERK1	-1	0.7663	0.2337
Asn0210	Ki	MAP kinase ERK1	-1	0.87	0.13
Asn0210	IC50	MAP kinase ERK2	-1	0.5113	0.4887
Asn0210	Ki	MAP kinase ERK2	-1	0.77	0.23
Asn0211	IC50	MAP kinase ERK1	-1	0.785	0.215
Asn0211	Ki	MAP kinase ERK1	-1	0.86	0.14
Asn0211	IC50	MAP kinase ERK2	-1	0.74	0.26
Asn0211	Ki	MAP kinase ERK2	-1	0.83	0.17
Asn0212	IC50	MAP kinase ERK1	-1	0.735	0.265
Asn0212	Ki	MAP kinase ERK1	-1	0.85	0.15
Asn0212	IC50	MAP kinase ERK2	-1	0.6467	0.3533
Asn0212	Ki	MAP kinase ERK2	-1	0.8433	0.1567
Asn0213	IC50	MAP kinase ERK1	-1	0.86	0.14
Asn0213	Ki	MAP kinase ERK1	-1	0.85	0.15
Asn0213	IC50	MAP kinase ERK2	-1	0.8	0.2
Asn0213	Ki	MAP kinase ERK2	-1	0.8	0.2
Asn0214	IC50	MAP kinase ERK1	-1	0.74	0.26
Asn0214	Ki	MAP kinase ERK1	-1	0.775	0.225
Asn0214	IC50	MAP kinase ERK2	-1	0.73	0.27
Asn0214	Ki	MAP kinase ERK2	-1	0.78	0.22
Asn0215	IC50	MAP kinase ERK1	-1	0.76	0.24
Asn0215	Ki	MAP kinase ERK1	-1	0.82	0.18
Asn0215	IC50	MAP kinase ERK2	-1	0.73	0.27
Asn0215	Ki	MAP kinase ERK2	-1	0.78	0.22
Asn0216	IC50	MAP kinase ERK1	-1	0.77	0.23
Asn0216	Ki	MAP kinase ERK1	-1	0.81	0.19
Asn0216	IC50	MAP kinase ERK2	-1	0.745	0.255
Asn0216	Ki	MAP kinase ERK2	-1	0.78	0.22
Asn0217	IC50	MAP kinase ERK1	-1	0.525	0.475
Asn0217	Ki	MAP kinase ERK1	-1	0.655	0.345
Asn0217	IC50	MAP kinase ERK2	-1	0.555	0.445
Asn0217	Ki	MAP kinase ERK2	1	0.275	0.725
Asn0218	IC50	MAP kinase ERK1	-1	0.79	0.21
Asn0218	Ki	MAP kinase ERK1	-1	0.82	0.18
Asn0218	IC50	MAP kinase ERK2	-1	0.735	0.265
Asn0218	Ki	MAP kinase ERK2	-1	0.74	0.26
Asn0219	IC50	MAP kinase ERK1	-1	0.7	0.3
Asn0219	Ki	MAP kinase ERK1	-1	0.85	0.15
Asn0219	IC50	MAP kinase ERK2	-1	0.63	0.37
Asn0219	Ki	MAP kinase ERK2	-1	0.75	0.25
Asn0220	IC50	MAP kinase ERK1	-1	0.79	0.21
Asn0220	Ki	MAP kinase ERK1	-1	0.78	0.22
Asn0220	IC50	MAP kinase ERK2	-1	0.71	0.29
Asn0220	Ki	MAP kinase ERK2	-1	0.7	0.3
Asn0221	IC50	MAP kinase ERK1	-1	0.72	0.28
Asn0221	Ki	MAP kinase ERK1	-1	0.75	0.25
Asn0221	IC50	MAP kinase ERK2	-1	0.64	0.36
Asn0221	Ki	MAP kinase ERK2	-1	0.625	0.375
Asn0222	IC50	MAP kinase ERK1	-1	0.63	0.37
Asn0222	Ki	MAP kinase ERK1	-1	0.56	0.44
Asn0222	IC50	MAP kinase ERK2	1	0.4333	0.5667
Asn0222	Ki	MAP kinase ERK2	1	0.4	0.6
Asn0223	IC50	MAP kinase ERK1	-1	0.81	0.19
Asn0223	Ki	MAP kinase ERK1	-1	0.76	0.24
Asn0223	IC50	MAP kinase ERK2	-1	0.6833	0.3167
Asn0223	Ki	MAP kinase ERK2	-1	0.6317	0.3683
Asn0224	IC50	MAP kinase ERK1	-1	0.5183	0.4817
Asn0224	Ki	MAP kinase ERK1	-1	0.6	0.4
Asn0224	IC50	MAP kinase ERK2	-1	0.5067	0.4933
Asn0224	Ki	MAP kinase ERK2	1	0.335	0.665
Asn0225	IC50	MAP kinase ERK1	-1	0.6925	0.3075
Asn0225	Ki	MAP kinase ERK1	-1	0.7025	0.2975
Asn0225	IC50	MAP kinase ERK2	-1	0.5025	0.4975
Asn0225	Ki	MAP kinase ERK2	-1	0.5458	0.4542
Asn0226	IC50	MAP kinase ERK1	-1	0.83	0.17
Asn0226	Ki	MAP kinase ERK1	-1	0.83	0.17
Asn0226	IC50	MAP kinase ERK2	-1	0.765	0.235
Asn0226	Ki	MAP kinase ERK2	-1	0.755	0.245
Asn0227	IC50	MAP kinase ERK1	-1	0.77	0.23
Asn0227	Ki	MAP kinase ERK1	-1	0.725	0.275
Asn0227	IC50	MAP kinase ERK2	-1	0.69	0.31
Asn0227	Ki	MAP kinase ERK2	-1	0.6567	0.3433
Asn0228	IC50	MAP kinase ERK1	-1	0.66	0.34
Asn0228	Ki	MAP kinase ERK1	-1	0.63	0.37
Asn0228	IC50	MAP kinase ERK2	-1	0.53	0.47
Asn0228	Ki	MAP kinase ERK2	1	0.4483	0.5517
Asn0229	IC50	MAP kinase ERK1	-1	0.67	0.33
Asn0229	Ki	MAP kinase ERK1	-1	0.51	0.49
Asn0229	IC50	MAP kinase ERK2	1	0.5	0.5
Asn0229	Ki	MAP kinase ERK2	1	0.25	0.75
Asn0230	IC50	MAP kinase ERK1	-1	0.67	0.33
Asn0230	Ki	MAP kinase ERK1	-1	0.825	0.175
Asn0230	IC50	MAP kinase ERK2	-1	0.61	0.39
Asn0230	Ki	MAP kinase ERK2	-1	0.765	0.235
Asn0231	IC50	MAP kinase ERK1	-1	0.78	0.22
Asn0231	Ki	MAP kinase ERK1	-1	0.81	0.19
Asn0231	IC50	MAP kinase ERK2	-1	0.7	0.3
Asn0231	Ki	MAP kinase ERK2	-1	0.6767	0.3233
Asn0232	IC50	MAP kinase ERK1	-1	0.71	0.29
Asn0232	Ki	MAP kinase ERK1	-1	0.72	0.28
Asn0232	IC50	MAP kinase ERK2	-1	0.51	0.49
Asn0232	Ki	MAP kinase ERK2	1	0.48	0.52
Asn0233	IC50	MAP kinase ERK1	-1	0.735	0.265
Asn0233	Ki	MAP kinase ERK1	-1	0.76	0.24
Asn0233	IC50	MAP kinase ERK2	-1	0.655	0.345
Asn0233	Ki	MAP kinase ERK2	-1	0.6667	0.3333
Asn0234	IC50	MAP kinase ERK1	-1	0.725	0.275
Asn0234	Ki	MAP kinase ERK1	-1	0.565	0.435
Asn0234	IC50	MAP kinase ERK2	1	0.5	0.5
Asn0234	Ki	MAP kinase ERK2	1	0.24	0.76
Asn0235	IC50	MAP kinase ERK1	-1	0.725	0.275
Asn0235	Ki	MAP kinase ERK1	-1	0.74	0.26
Asn0235	IC50	MAP kinase ERK2	-1	0.585	0.415
Asn0235	Ki	MAP kinase ERK2	-1	0.6033	0.3967
Asn0236	IC50	MAP kinase ERK1	-1	0.66	0.34
Asn0236	Ki	MAP kinase ERK1	-1	0.53	0.47
Asn0236	IC50	MAP kinase ERK2	1	0.47	0.53
Asn0236	Ki	MAP kinase ERK2	1	0.3067	0.6933
Asn0237	IC50	MAP kinase ERK1	-1	0.77	0.23
Asn0237	Ki	MAP kinase ERK1	-1	0.755	0.245
Asn0237	IC50	MAP kinase ERK2	-1	0.7	0.3
Asn0237	Ki	MAP kinase ERK2	-1	0.7267	0.2733
Asn0238	IC50	MAP kinase ERK1	-1	0.62	0.38
Asn0238	Ki	MAP kinase ERK1	-1	0.8267	0.1733
Asn0238	IC50	MAP kinase ERK2	-1	0.6583	0.3417
Asn0238	Ki	MAP kinase ERK2	1	0.4167	0.5833
Asn0239	IC50	MAP kinase ERK1	-1	0.61	0.39
Asn0239	Ki	MAP kinase ERK1	-1	0.805	0.195
Asn0239	IC50	MAP kinase ERK2	-1	0.6217	0.3783
Asn0239	Ki	MAP kinase ERK2	1	0.4467	0.5533
Asn0240	IC50	MAP kinase ERK1	-1	0.59	0.41
Asn0240	Ki	MAP kinase ERK1	1	0.45	0.55
Asn0240	IC50	MAP kinase ERK2	1	0.31	0.69
Asn0240	Ki	MAP kinase ERK2	1	0.45	0.55
Asn0241	IC50	MAP kinase ERK1	-1	0.78	0.22
Asn0241	Ki	MAP kinase ERK1	-1	0.6567	0.3433
Asn0241	IC50	MAP kinase ERK2	1	0.48	0.52
Asn0241	Ki	MAP kinase ERK2	1	0.25	0.75
Asn0242	IC50	MAP kinase ERK1	-1	0.99	0.01
Asn0242	Ki	MAP kinase ERK1	-1	1	0
Asn0242	IC50	MAP kinase ERK2	-1	0.97	0.03
Asn0242	Ki	MAP kinase ERK2	-1	0.99	0.01
Asn0243	IC50	MAP kinase ERK1	-1	0.83	0.17
Asn0243	Ki	MAP kinase ERK1	-1	0.96	0.04
Asn0243	IC50	MAP kinase ERK2	-1	0.77	0.23
Asn0243	Ki	MAP kinase ERK2	-1	0.93	0.07
Asn0244	IC50	MAP kinase ERK1	-1	0.72	0.28
Asn0244	Ki	MAP kinase ERK1	-1	0.85	0.15
Asn0244	IC50	MAP kinase ERK2	-1	0.73	0.27
Asn0244	Ki	MAP kinase ERK2	1	0.35	0.65
Asn0245	IC50	MAP kinase ERK1	-1	0.95	0.05
Asn0245	Ki	MAP kinase ERK1	-1	0.98	0.02
Asn0245	IC50	MAP kinase ERK2	-1	0.88	0.12
Asn0245	Ki	MAP kinase ERK2	-1	0.97	0.03
Asn0246	IC50	MAP kinase ERK1	-1	1	0
Asn0246	Ki	MAP kinase ERK1	-1	1	0
Asn0246	IC50	MAP kinase ERK2	-1	1	0
Asn0246	Ki	MAP kinase ERK2	-1	1	0
Asn0247	IC50	MAP kinase ERK1	-1	0.905	0.095
Asn0247	Ki	MAP kinase ERK1	-1	0.99	0.01
Asn0247	IC50	MAP kinase ERK2	-1	0.845	0.155
Asn0247	Ki	MAP kinase ERK2	-1	0.97	0.03
Asn0248	IC50	MAP kinase ERK1	-1	0.77	0.23
Asn0248	Ki	MAP kinase ERK1	-1	0.81	0.19
Asn0248	IC50	MAP kinase ERK2	-1	0.7	0.3
Asn0248	Ki	MAP kinase ERK2	-1	0.6567	0.3433
Asn0249	IC50	MAP kinase ERK1	-1	0.99	0.01
Asn0249	Ki	MAP kinase ERK1	-1	0.98	0.02
Asn0249	IC50	MAP kinase ERK2	-1	1	0
Asn0249	Ki	MAP kinase ERK2	-1	1	0
Asn0250	IC50	MAP kinase ERK1	-1	0.74	0.26
Asn0250	Ki	MAP kinase ERK1	-1	0.82	0.18
Asn0250	IC50	MAP kinase ERK2	-1	0.67	0.33
Asn0250	Ki	MAP kinase ERK2	-1	0.76	0.24
Asn0251	IC50	MAP kinase ERK1	-1	0.79	0.21
Asn0251	Ki	MAP kinase ERK1	-1	0.8117	0.1883
Asn0251	IC50	MAP kinase ERK2	-1	0.78	0.22
Asn0251	Ki	MAP kinase ERK2	-1	0.7717	0.2283
Asn0252	IC50	MAP kinase ERK1	-1	0.78	0.22
Asn0252	Ki	MAP kinase ERK1	-1	0.86	0.14
Asn0252	IC50	MAP kinase ERK2	-1	0.73	0.27
Asn0252	Ki	MAP kinase ERK2	-1	0.7667	0.2333
Asn0253	IC50	MAP kinase ERK1	-1	0.84	0.16
Asn0253	Ki	MAP kinase ERK1	-1	0.97	0.03
Asn0253	IC50	MAP kinase ERK2	-1	0.6425	0.3575
Asn0253	Ki	MAP kinase ERK2	-1	0.95	0.05
Asn0254	IC50	MAP kinase ERK1	-1	0.87	0.13
Asn0254	Ki	MAP kinase ERK1	-1	0.86	0.14
Asn0254	IC50	MAP kinase ERK2	-1	0.8	0.2
Asn0254	Ki	MAP kinase ERK2	-1	0.775	0.225
Asn0255	IC50	MAP kinase ERK1	-1	1	0
Asn0255	Ki	MAP kinase ERK1	-1	1	0
Asn0255	IC50	MAP kinase ERK2	-1	0.97	0.03
Asn0255	Ki	MAP kinase ERK2	-1	0.98	0.02
Asn0256	IC50	MAP kinase ERK1	-1	0.91	0.09
Asn0256	Ki	MAP kinase ERK1	-1	0.97	0.03
Asn0256	IC50	MAP kinase ERK2	-1	0.87	0.13
Asn0256	Ki	MAP kinase ERK2	-1	0.96	0.04
Asn0257	IC50	MAP kinase ERK1	-1	0.93	0.07
Asn0257	Ki	MAP kinase ERK1	-1	0.96	0.04
Asn0257	IC50	MAP kinase ERK2	-1	0.92	0.08
Asn0257	Ki	MAP kinase ERK2	-1	0.94	0.06
Asn0258	IC50	MAP kinase ERK1	-1	0.93	0.07
Asn0258	Ki	MAP kinase ERK1	-1	0.96	0.04
Asn0258	IC50	MAP kinase ERK2	-1	0.92	0.08
Asn0258	Ki	MAP kinase ERK2	-1	0.94	0.06
Asn0259	IC50	MAP kinase ERK1	-1	0.94	0.06
Asn0259	Ki	MAP kinase ERK1	-1	0.96	0.04
Asn0259	IC50	MAP kinase ERK2	-1	0.92	0.08
Asn0259	Ki	MAP kinase ERK2	-1	0.94	0.06
Asn0260	IC50	MAP kinase ERK1	-1	0.855	0.145
Asn0260	Ki	MAP kinase ERK1	-1	0.95	0.05
Asn0260	IC50	MAP kinase ERK2	-1	0.905	0.095
Asn0260	Ki	MAP kinase ERK2	-1	0.93	0.07
Asn0261	IC50	MAP kinase ERK1	-1	0.845	0.155
Asn0261	Ki	MAP kinase ERK1	-1	0.98	0.02
Asn0261	IC50	MAP kinase ERK2	-1	0.85	0.15
Asn0261	Ki	MAP kinase ERK2	-1	0.95	0.05
Asn0262	IC50	MAP kinase ERK1	-1	0.85	0.15
Asn0262	Ki	MAP kinase ERK1	-1	0.775	0.225
Asn0262	IC50	MAP kinase ERK2	-1	0.8	0.2
Asn0262	Ki	MAP kinase ERK2	-1	0.79	0.21
Asn0263	IC50	MAP kinase ERK1	-1	0.87	0.13
Asn0263	Ki	MAP kinase ERK1	-1	0.825	0.175
Asn0263	IC50	MAP kinase ERK2	-1	0.84	0.16
Asn0263	Ki	MAP kinase ERK2	-1	0.8	0.2
Asn0264	IC50	MAP kinase ERK1	-1	0.94	0.06
Asn0264	Ki	MAP kinase ERK1	-1	0.99	0.01
Asn0264	IC50	MAP kinase ERK2	-1	0.92	0.08
Asn0264	Ki	MAP kinase ERK2	-1	0.95	0.05
Asn0265	IC50	MAP kinase ERK1	-1	0.69	0.31
Asn0265	Ki	MAP kinase ERK1	-1	0.84	0.16
Asn0265	IC50	MAP kinase ERK2	-1	0.52	0.48
Asn0265	Ki	MAP kinase ERK2	-1	0.74	0.26
Asn0266	IC50	MAP kinase ERK1	-1	0.63	0.37
Asn0266	Ki	MAP kinase ERK1	-1	0.81	0.19
Asn0266	IC50	MAP kinase ERK2	-1	0.72	0.28
Asn0266	Ki	MAP kinase ERK2	1	0.3233	0.6767
Asn0267	IC50	MAP kinase ERK1	-1	0.7375	0.2625
Asn0267	Ki	MAP kinase ERK1	-1	0.89	0.11
Asn0267	IC50	MAP kinase ERK2	-1	0.61	0.39
Asn0267	Ki	MAP kinase ERK2	-1	0.78	0.22
Asn0268	IC50	MAP kinase ERK1	-1	0.89	0.11
Asn0268	Ki	MAP kinase ERK1	-1	0.97	0.03
Asn0268	IC50	MAP kinase ERK2	-1	0.83	0.17
Asn0268	Ki	MAP kinase ERK2	-1	0.91	0.09
Asn0269	IC50	MAP kinase ERK1	-1	0.8725	0.1275
Asn0269	Ki	MAP kinase ERK1	-1	0.96	0.04
Asn0269	IC50	MAP kinase ERK2	-1	0.81	0.19
Asn0269	Ki	MAP kinase ERK2	-1	0.9	0.1
Asn0270	IC50	MAP kinase ERK1	-1	0.91	0.09
Asn0270	Ki	MAP kinase ERK1	-1	0.97	0.03
Asn0270	IC50	MAP kinase ERK2	-1	0.81	0.19
Asn0270	Ki	MAP kinase ERK2	-1	0.96	0.04
Asn0271	IC50	MAP kinase ERK1	-1	0.87	0.13
Asn0271	Ki	MAP kinase ERK1	-1	0.95	0.05
Asn0271	IC50	MAP kinase ERK2	-1	0.72	0.28
Asn0271	Ki	MAP kinase ERK2	-1	0.9	0.1
Asn0272	IC50	MAP kinase ERK1	-1	0.83	0.17
Asn0272	Ki	MAP kinase ERK1	-1	0.99	0.01
Asn0272	IC50	MAP kinase ERK2	-1	0.7	0.3
Asn0272	Ki	MAP kinase ERK2	-1	0.96	0.04
Asn0273	IC50	MAP kinase ERK1	-1	0.7	0.3
Asn0273	Ki	MAP kinase ERK1	-1	0.9333	0.0667
Asn0273	IC50	MAP kinase ERK2	-1	0.835	0.165
Asn0273	Ki	MAP kinase ERK2	1	0.4967	0.5033
Asn0274	IC50	MAP kinase ERK1	-1	0.91	0.09
Asn0274	Ki	MAP kinase ERK1	-1	0.96	0.04
Asn0274	IC50	MAP kinase ERK2	-1	0.81	0.19
Asn0274	Ki	MAP kinase ERK2	-1	0.93	0.07
Asn0275	IC50	MAP kinase ERK1	-1	0.87	0.13
Asn0275	Ki	MAP kinase ERK1	-1	0.93	0.07
Asn0275	IC50	MAP kinase ERK2	-1	0.8	0.2
Asn0275	Ki	MAP kinase ERK2	-1	0.91	0.09
Asn0276	IC50	MAP kinase ERK1	-1	0.92	0.08
Asn0276	Ki	MAP kinase ERK1	-1	0.96	0.04
Asn0276	IC50	MAP kinase ERK2	-1	0.8	0.2
Asn0276	Ki	MAP kinase ERK2	-1	0.92	0.08
Asn0277	IC50	MAP kinase ERK1	-1	0.905	0.095
Asn0277	Ki	MAP kinase ERK1	-1	0.88	0.12
Asn0277	IC50	MAP kinase ERK2	-1	0.8	0.2
Asn0277	Ki	MAP kinase ERK2	-1	0.8033	0.1967
Asn0278	IC50	MAP kinase ERK1	-1	0.8	0.2
Asn0278	Ki	MAP kinase ERK1	-1	0.74	0.26
Asn0278	IC50	MAP kinase ERK2	-1	0.78	0.22
Asn0278	Ki	MAP kinase ERK2	-1	0.69	0.31
Asn0279	IC50	MAP kinase ERK1	-1	0.81	0.19
Asn0279	Ki	MAP kinase ERK1	-1	0.71	0.29
Asn0279	IC50	MAP kinase ERK2	-1	0.77	0.23
Asn0279	Ki	MAP kinase ERK2	-1	0.69	0.31
Asn0280	IC50	MAP kinase ERK1	-1	0.87	0.13
Asn0280	Ki	MAP kinase ERK1	-1	0.93	0.07
Asn0280	IC50	MAP kinase ERK2	-1	0.85	0.15
Asn0280	Ki	MAP kinase ERK2	-1	0.91	0.09
Asn0281	IC50	MAP kinase ERK1	-1	0.705	0.295
Asn0281	Ki	MAP kinase ERK1	-1	0.87	0.13
Asn0281	IC50	MAP kinase ERK2	-1	0.535	0.465
Asn0281	Ki	MAP kinase ERK2	-1	0.86	0.14
Asn0282	IC50	MAP kinase ERK1	-1	0.78	0.22
Asn0282	Ki	MAP kinase ERK1	-1	0.93	0.07
Asn0282	IC50	MAP kinase ERK2	-1	0.62	0.38
Asn0282	Ki	MAP kinase ERK2	-1	0.85	0.15
Asn0283	IC50	MAP kinase ERK1	-1	0.68	0.32
Asn0283	Ki	MAP kinase ERK1	-1	0.9	0.1
Asn0283	IC50	MAP kinase ERK2	-1	0.84	0.16
Asn0283	Ki	MAP kinase ERK2	1	0.43	0.57
Asn0284 (H1)	IC50	MAP kinase ERK1	1	0.38	0.62
Asn0284 (H1)	Ki	MAP kinase ERK1	1	0.43	0.57
Asn0284 (H1)	IC50	MAP kinase ERK2	1	0.255	0.745
Asn0284 (H1)	Ki	MAP kinase ERK2	1	0.4125	0.5875
Asn0285 (H2)	IC50	MAP kinase ERK1	1	0.43	0.57
Asn0285 (H2)	Ki	MAP kinase ERK1	1	0.44	0.56
Asn0285 (H2)	IC50	MAP kinase ERK2	1	0.23	0.77
Asn0285 (H2)	Ki	MAP kinase ERK2	1	0.38	0.62
Asn0286	IC50	MAP kinase ERK1	-1	0.57	0.43
Asn0286	Ki	MAP kinase ERK1	-1	0.505	0.495
Asn0286	IC50	MAP kinase ERK2	1	0.47	0.53
Asn0286	Ki	MAP kinase ERK2	1	0.32	0.68
Asn0287	IC50	MAP kinase ERK1	-1	0.585	0.415
Asn0287	Ki	MAP kinase ERK1	-1	0.59	0.41
Asn0287	IC50	MAP kinase ERK2	-1	0.535	0.465
Asn0287	Ki	MAP kinase ERK2	-1	0.56	0.44
Asn0288	IC50	MAP kinase ERK1	-1	0.82	0.18
Asn0288	Ki	MAP kinase ERK1	-1	0.92	0.08
Asn0288	IC50	MAP kinase ERK2	-1	0.67	0.33
Asn0288	Ki	MAP kinase ERK2	-1	0.85	0.15
Asn0289	IC50	MAP kinase ERK1	-1	0.95	0.05
Asn0289	Ki	MAP kinase ERK1	-1	0.91	0.09
Asn0289	IC50	MAP kinase ERK2	-1	0.86	0.14
Asn0289	Ki	MAP kinase ERK2	-1	0.86	0.14
Asn0290	IC50	MAP kinase ERK1	-1	0.95	0.05
Asn0290	Ki	MAP kinase ERK1	-1	0.87	0.13
Asn0290	IC50	MAP kinase ERK2	-1	0.88	0.12
Asn0290	Ki	MAP kinase ERK2	-1	0.82	0.18
Asn0291	IC50	MAP kinase ERK1	-1	0.81	0.19
Asn0291	Ki	MAP kinase ERK1	-1	0.8	0.2
Asn0291	IC50	MAP kinase ERK2	-1	0.655	0.345
Asn0291	Ki	MAP kinase ERK2	-1	0.63	0.37
Asn0292	IC50	MAP kinase ERK1	-1	0.79	0.21
Asn0292	Ki	MAP kinase ERK1	-1	0.79	0.21
Asn0292	IC50	MAP kinase ERK2	-1	0.655	0.345
Asn0292	Ki	MAP kinase ERK2	-1	0.65	0.35
Asn0293	IC50	MAP kinase ERK1	-1	0.945	0.055
Asn0293	Ki	MAP kinase ERK1	-1	0.91	0.09
Asn0293	IC50	MAP kinase ERK2	-1	0.87	0.13
Asn0293	Ki	MAP kinase ERK2	-1	0.87	0.13
Asn0294	IC50	MAP kinase ERK1	-1	0.95	0.05
Asn0294	Ki	MAP kinase ERK1	-1	0.87	0.13
Asn0294	IC50	MAP kinase ERK2	-1	0.87	0.13
Asn0294	Ki	MAP kinase ERK2	-1	0.83	0.17
Asn0295	IC50	MAP kinase ERK1	-1	0.815	0.185
Asn0295	Ki	MAP kinase ERK1	-1	0.78	0.22
Asn0295	IC50	MAP kinase ERK2	-1	0.68	0.32
Asn0295	Ki	MAP kinase ERK2	-1	0.65	0.35
Asn0296	IC50	MAP kinase ERK1	-1	0.795	0.205
Asn0296	Ki	MAP kinase ERK1	-1	0.78	0.22
Asn0296	IC50	MAP kinase ERK2	-1	0.68	0.32
Asn0296	Ki	MAP kinase ERK2	-1	0.67	0.33
Asn0297	IC50	MAP kinase ERK1	-1	0.7355	0.2645
Asn0297	Ki	MAP kinase ERK1	-1	0.79	0.21
Asn0297	IC50	MAP kinase ERK2	-1	0.6038	0.3962
Asn0297	Ki	MAP kinase ERK2	-1	0.73	0.27
Asn0298	IC50	MAP kinase ERK1	-1	0.74	0.26
Asn0298	Ki	MAP kinase ERK1	-1	0.82	0.18
Asn0298	IC50	MAP kinase ERK2	-1	0.7	0.3
Asn0298	Ki	MAP kinase ERK2	1	0.495	0.505
Asn0299	IC50	MAP kinase ERK1	-1	0.74	0.26
Asn0299	Ki	MAP kinase ERK1	-1	0.81	0.19
Asn0299	IC50	MAP kinase ERK2	-1	0.71	0.29
Asn0299	Ki	MAP kinase ERK2	1	0.495	0.505
Asn0300	IC50	MAP kinase ERK1	-1	0.75	0.25
Asn0300	Ki	MAP kinase ERK1	-1	0.84	0.16
Asn0300	IC50	MAP kinase ERK2	-1	0.67	0.33
Asn0300	Ki	MAP kinase ERK2	1	0.4183	0.5817
Asn0301	IC50	MAP kinase ERK1	-1	0.74	0.26
Asn0301	Ki	MAP kinase ERK1	-1	0.77	0.23
Asn0301	IC50	MAP kinase ERK2	-1	0.5483	0.4517
Asn0301	Ki	MAP kinase ERK2	-1	0.7	0.3
Asn0302	IC50	MAP kinase ERK1	-1	0.74	0.26
Asn0302	Ki	MAP kinase ERK1	-1	0.82	0.18
Asn0302	IC50	MAP kinase ERK2	-1	0.7	0.3
Asn0302	Ki	MAP kinase ERK2	1	0.48	0.52
Asn0303	IC50	MAP kinase ERK1	-1	0.74	0.26
Asn0303	Ki	MAP kinase ERK1	-1	0.81	0.19
Asn0303	IC50	MAP kinase ERK2	-1	0.71	0.29
Asn0303	Ki	MAP kinase ERK2	1	0.48	0.52
Asn0304	IC50	MAP kinase ERK1	-1	0.7275	0.2725
Asn0304	Ki	MAP kinase ERK1	-1	0.86	0.14
Asn0304	IC50	MAP kinase ERK2	-1	0.5275	0.4725
Asn0304	Ki	MAP kinase ERK2	-1	0.78	0.22
Asn0305	IC50	MAP kinase ERK1	-1	0.7075	0.2925
Asn0305	Ki	MAP kinase ERK1	-1	0.83	0.17
Asn0305	IC50	MAP kinase ERK2	-1	0.79	0.21
Asn0305	Ki	MAP kinase ERK2	1	0.4975	0.5025
Asn0306	IC50	MAP kinase ERK1	-1	0.68	0.32
Asn0306	Ki	MAP kinase ERK1	-1	0.88	0.12
Asn0306	IC50	MAP kinase ERK2	-1	0.85	0.15
Asn0306	Ki	MAP kinase ERK2	1	0.3533	0.6467
Asn0307	IC50	MAP kinase ERK1	-1	0.67	0.33
Asn0307	Ki	MAP kinase ERK1	-1	0.88	0.12
Asn0307	IC50	MAP kinase ERK2	-1	0.84	0.16
Asn0307	Ki	MAP kinase ERK2	1	0.3633	0.6367
Asn0308	IC50	MAP kinase ERK1	-1	0.7	0.3
Asn0308	Ki	MAP kinase ERK1	-1	0.87	0.13
Asn0308	IC50	MAP kinase ERK2	-1	0.79	0.21
Asn0308	Ki	MAP kinase ERK2	1	0.36	0.64
Asn0309	IC50	MAP kinase ERK1	-1	0.7125	0.2875
Asn0309	Ki	MAP kinase ERK1	-1	0.87	0.13
Asn0309	IC50	MAP kinase ERK2	-1	0.8	0.2
Asn0309	Ki	MAP kinase ERK2	1	0.3675	0.6325
Asn0310	IC50	MAP kinase ERK1	-1	0.7525	0.2475
Asn0310	Ki	MAP kinase ERK1	-1	0.89	0.11
Asn0310	IC50	MAP kinase ERK2	-1	0.5075	0.4925
Asn0310	Ki	MAP kinase ERK2	-1	0.85	0.15
Asn0311	IC50	MAP kinase ERK1	-1	0.6275	0.3725
Asn0311	Ki	MAP kinase ERK1	-1	0.69	0.31
Asn0311	IC50	MAP kinase ERK2	-1	0.51	0.49
Asn0311	Ki	MAP kinase ERK2	-1	0.564	0.436
Asn0312	IC50	MAP kinase ERK1	-1	0.6275	0.3725
Asn0312	Ki	MAP kinase ERK1	-1	0.69	0.31
Asn0312	IC50	MAP kinase ERK2	-1	0.554	0.446
Asn0312	Ki	MAP kinase ERK2	1	0.475	0.525
Asn0313	IC50	MAP kinase ERK1	-1	0.63	0.37
Asn0313	Ki	MAP kinase ERK1	-1	0.76	0.24
Asn0313	IC50	MAP kinase ERK2	-1	0.515	0.485
Asn0313	Ki	MAP kinase ERK2	-1	0.614	0.386
Asn0314	IC50	MAP kinase ERK1	-1	0.57	0.43
Asn0314	Ki	MAP kinase ERK1	-1	0.8167	0.1833
Asn0314	IC50	MAP kinase ERK2	-1	0.7167	0.2833
Asn0314	Ki	MAP kinase ERK2	1	0.385	0.615
Asn0315	IC50	MAP kinase ERK1	-1	0.64	0.36
Asn0315	Ki	MAP kinase ERK1	-1	0.78	0.22
Asn0315	IC50	MAP kinase ERK2	-1	0.75	0.25
Asn0315	Ki	MAP kinase ERK2	1	0.45	0.55
Asn0316	IC50	MAP kinase ERK1	-1	0.6	0.4
Asn0316	Ki	MAP kinase ERK1	-1	0.85	0.15
Asn0316	IC50	MAP kinase ERK2	-1	0.81	0.19
Asn0316	Ki	MAP kinase ERK2	1	0.465	0.535
Asn0317	IC50	MAP kinase ERK1	-1	0.6375	0.3625
Asn0317	Ki	MAP kinase ERK1	-1	0.7	0.3
Asn0317	IC50	MAP kinase ERK2	-1	0.57	0.43
Asn0317	Ki	MAP kinase ERK2	-1	0.574	0.426
Asn0318	IC50	MAP kinase ERK1	-1	0.5475	0.4525
Asn0318	Ki	MAP kinase ERK1	-1	0.76	0.24
Asn0318	IC50	MAP kinase ERK2	-1	0.67	0.33
Asn0318	Ki	MAP kinase ERK2	1	0.495	0.505
Asn0319	IC50	MAP kinase ERK1	-1	0.56	0.44
Asn0319	Ki	MAP kinase ERK1	-1	0.83	0.17
Asn0319	IC50	MAP kinase ERK2	-1	0.72	0.28
Asn0319	Ki	MAP kinase ERK2	1	0.385	0.615
Asn0320	IC50	MAP kinase ERK1	-1	0.7075	0.2925
Asn0320	Ki	MAP kinase ERK1	-1	0.85	0.15
Asn0320	IC50	MAP kinase ERK2	-1	0.6025	0.3975
Asn0320	Ki	MAP kinase ERK2	-1	0.8	0.2
Asn0321	IC50	MAP kinase ERK1	-1	0.5375	0.4625
Asn0321	Ki	MAP kinase ERK1	-1	0.77	0.23
Asn0321	IC50	MAP kinase ERK2	-1	0.73	0.27
Asn0321	Ki	MAP kinase ERK2	1	0.425	0.575
Asn0322	IC50	MAP kinase ERK1	-1	0.89	0.11
Asn0322	Ki	MAP kinase ERK1	-1	0.97	0.03
Asn0322	IC50	MAP kinase ERK2	-1	0.715	0.285
Asn0322	Ki	MAP kinase ERK2	-1	0.96	0.04
Asn0323	IC50	MAP kinase ERK1	-1	0.585	0.415
Asn0323	Ki	MAP kinase ERK1	-1	0.6775	0.3225
Asn0323	IC50	MAP kinase ERK2	-1	0.6075	0.3925
Asn0323	Ki	MAP kinase ERK2	1	0.4017	0.5983
Asn0324	IC50	MAP kinase ERK1	-1	0.97	0.03
Asn0324	Ki	MAP kinase ERK1	-1	0.99	0.01
Asn0324	IC50	MAP kinase ERK2	-1	0.97	0.03
Asn0324	Ki	MAP kinase ERK2	-1	1	0
Asn0325	IC50	MAP kinase ERK1	-1	0.8	0.2
Asn0325	Ki	MAP kinase ERK1	-1	0.85	0.15
Asn0325	IC50	MAP kinase ERK2	-1	0.66	0.34
Asn0325	Ki	MAP kinase ERK2	-1	0.7433	0.2567
Asn0326	IC50	MAP kinase ERK1	-1	0.98	0.02
Asn0326	Ki	MAP kinase ERK1	-1	1	0
Asn0326	IC50	MAP kinase ERK2	-1	0.95	0.05
Asn0326	Ki	MAP kinase ERK2	-1	0.99	0.01
Asn0327	IC50	MAP kinase ERK1	-1	0.92	0.08
Asn0327	Ki	MAP kinase ERK1	-1	0.96	0.04
Asn0327	IC50	MAP kinase ERK2	-1	0.8367	0.1633
Asn0327	Ki	MAP kinase ERK2	-1	0.9	0.1
Asn0328	IC50	MAP kinase ERK1	-1	0.96	0.04
Asn0328	Ki	MAP kinase ERK1	-1	0.98	0.02
Asn0328	IC50	MAP kinase ERK2	-1	0.9	0.1
Asn0328	Ki	MAP kinase ERK2	-1	0.96	0.04
Asn0329	IC50	MAP kinase ERK1	-1	0.97	0.03
Asn0329	Ki	MAP kinase ERK1	-1	0.96	0.04
Asn0329	IC50	MAP kinase ERK2	-1	0.92	0.08
Asn0329	Ki	MAP kinase ERK2	-1	0.93	0.07
Asn0330	IC50	MAP kinase ERK1	-1	0.95	0.05
Asn0330	Ki	MAP kinase ERK1	-1	0.95	0.05
Asn0330	IC50	MAP kinase ERK2	-1	0.92	0.08
Asn0330	Ki	MAP kinase ERK2	-1	0.93	0.07
Asn0331	IC50	MAP kinase ERK1	-1	0.95	0.05
Asn0331	Ki	MAP kinase ERK1	-1	0.95	0.05
Asn0331	IC50	MAP kinase ERK2	-1	0.9	0.1
Asn0331	Ki	MAP kinase ERK2	-1	0.94	0.06
Asn0332	IC50	MAP kinase ERK1	-1	0.9	0.1
Asn0332	Ki	MAP kinase ERK1	-1	0.88	0.12
Asn0332	IC50	MAP kinase ERK2	-1	0.81	0.19
Asn0332	Ki	MAP kinase ERK2	-1	0.78	0.22
Asn0333	IC50	MAP kinase ERK1	-1	0.9	0.1
Asn0333	Ki	MAP kinase ERK1	-1	0.79	0.21
Asn0333	IC50	MAP kinase ERK2	-1	0.914	0.086
Asn0333	Ki	MAP kinase ERK2	-1	0.79	0.21
Asn0334	IC50	MAP kinase ERK1	-1	1	0
Asn0334	Ki	MAP kinase ERK1	-1	1	0
Asn0334	IC50	MAP kinase ERK2	-1	0.98	0.02
Asn0334	Ki	MAP kinase ERK2	-1	0.96	0.04
Asn0335	IC50	MAP kinase ERK1	-1	0.91	0.09
Asn0335	Ki	MAP kinase ERK1	-1	0.98	0.02
Asn0335	IC50	MAP kinase ERK2	-1	0.88	0.12
Asn0335	Ki	MAP kinase ERK2	-1	0.89	0.11
Asn0336	IC50	MAP kinase ERK1	-1	0.93	0.07
Asn0336	Ki	MAP kinase ERK1	-1	0.94	0.06
Asn0336	IC50	MAP kinase ERK2	-1	0.92	0.08
Asn0336	Ki	MAP kinase ERK2	-1	0.94	0.06
Asn0337	IC50	MAP kinase ERK1	-1	0.85	0.15
Asn0337	Ki	MAP kinase ERK1	-1	0.925	0.075
Asn0337	IC50	MAP kinase ERK2	-1	0.8	0.2
Asn0337	Ki	MAP kinase ERK2	-1	0.92	0.08
Asn0338	IC50	MAP kinase ERK1	-1	0.89	0.11
Asn0338	Ki	MAP kinase ERK1	-1	0.91	0.09
Asn0338	IC50	MAP kinase ERK2	-1	0.81	0.19
Asn0338	Ki	MAP kinase ERK2	-1	0.8367	0.1633
Asn0339	IC50	MAP kinase ERK1	-1	0.89	0.11
Asn0339	Ki	MAP kinase ERK1	-1	0.88	0.12
Asn0339	IC50	MAP kinase ERK2	-1	0.82	0.18
Asn0339	Ki	MAP kinase ERK2	-1	0.82	0.18
Asn0340	IC50	MAP kinase ERK1	-1	0.956	0.044
Asn0340	Ki	MAP kinase ERK1	-1	0.98	0.02
Asn0340	IC50	MAP kinase ERK2	-1	0.956	0.044
Asn0340	Ki	MAP kinase ERK2	-1	0.96	0.04
Asn0341	IC50	MAP kinase ERK1	-1	0.6625	0.3375
Asn0341	Ki	MAP kinase ERK1	-1	0.6625	0.3375
Asn0341	IC50	MAP kinase ERK2	-1	0.7125	0.2875
Asn0341	Ki	MAP kinase ERK2	-1	0.6725	0.3275
Asn0342	IC50	MAP kinase ERK1	-1	0.79	0.21
Asn0342	Ki	MAP kinase ERK1	-1	0.82	0.18
Asn0342	IC50	MAP kinase ERK2	-1	0.6533	0.3467
Asn0342	Ki	MAP kinase ERK2	-1	0.77	0.23
Asn0343	IC50	MAP kinase ERK1	-1	0.8317	0.1683
Asn0343	Ki	MAP kinase ERK1	-1	0.84	0.16
Asn0343	IC50	MAP kinase ERK2	-1	0.7117	0.2883
Asn0343	Ki	MAP kinase ERK2	-1	0.78	0.22
Asn0344	IC50	MAP kinase ERK1	-1	0.78	0.22
Asn0344	Ki	MAP kinase ERK1	-1	0.82	0.18
Asn0344	IC50	MAP kinase ERK2	-1	0.6833	0.3167
Asn0344	Ki	MAP kinase ERK2	-1	0.7433	0.2567
Asn0345	IC50	MAP kinase ERK1	-1	0.82	0.18
Asn0345	Ki	MAP kinase ERK1	-1	0.82	0.18
Asn0345	IC50	MAP kinase ERK2	-1	0.6733	0.3267
Asn0345	Ki	MAP kinase ERK2	-1	0.7233	0.2767
Asn0346	IC50	MAP kinase ERK1	-1	0.94	0.06
Asn0346	Ki	MAP kinase ERK1	-1	1	0
Asn0346	IC50	MAP kinase ERK2	-1	0.91	0.09
Asn0346	Ki	MAP kinase ERK2	-1	0.97	0.03
Asn0347	IC50	MAP kinase ERK1	-1	0.89	0.11
Asn0347	Ki	MAP kinase ERK1	-1	0.8333	0.1667
Asn0347	IC50	MAP kinase ERK2	-1	0.7533	0.2467
Asn0347	Ki	MAP kinase ERK2	-1	0.7633	0.2367
Asn0348	IC50	MAP kinase ERK1	-1	0.73	0.27
Asn0348	Ki	MAP kinase ERK1	-1	0.7	0.3
Asn0348	IC50	MAP kinase ERK2	-1	0.54	0.46
Asn0348	Ki	MAP kinase ERK2	-1	0.54	0.46
Asn0349	IC50	MAP kinase ERK1	-1	0.81	0.19
Asn0349	Ki	MAP kinase ERK1	-1	0.86	0.14
Asn0349	IC50	MAP kinase ERK2	-1	0.64	0.36
Asn0349	Ki	MAP kinase ERK2	-1	0.69	0.31
Asn0350	IC50	MAP kinase ERK1	-1	0.99	0.01
Asn0350	Ki	MAP kinase ERK1	-1	0.99	0.01
Asn0350	IC50	MAP kinase ERK2	-1	0.98	0.02
Asn0350	Ki	MAP kinase ERK2	-1	0.99	0.01
Asn0351	IC50	MAP kinase ERK1	-1	1	0
Asn0351	Ki	MAP kinase ERK1	-1	1	0
Asn0351	IC50	MAP kinase ERK2	-1	0.98	0.02
Asn0351	Ki	MAP kinase ERK2	-1	0.99	0.01
Asn0352	IC50	MAP kinase ERK1	-1	0.94	0.06
Asn0352	Ki	MAP kinase ERK1	-1	0.87	0.13
Asn0352	IC50	MAP kinase ERK2	-1	0.8	0.2
Asn0352	Ki	MAP kinase ERK2	-1	0.77	0.23
Asn0353	IC50	MAP kinase ERK1	-1	0.86	0.14
Asn0353	Ki	MAP kinase ERK1	-1	0.79	0.21
Asn0353	IC50	MAP kinase ERK2	-1	0.7533	0.2467
Asn0353	Ki	MAP kinase ERK2	-1	0.7233	0.2767
Asn0354	IC50	MAP kinase ERK1	-1	0.83	0.17
Asn0354	Ki	MAP kinase ERK1	-1	0.78	0.22
Asn0354	IC50	MAP kinase ERK2	-1	0.7133	0.2867
Asn0354	Ki	MAP kinase ERK2	-1	0.7133	0.2867
Asn0355	IC50	MAP kinase ERK1	-1	0.59	0.41
Asn0355	Ki	MAP kinase ERK1	-1	0.6714	0.3286
Asn0355	IC50	MAP kinase ERK2	-1	0.51	0.49
Asn0355	Ki	MAP kinase ERK2	1	0.46	0.54
Asn0356	IC50	MAP kinase ERK1	-1	0.92	0.08
Asn0356	Ki	MAP kinase ERK1	-1	0.96	0.04
Asn0356	IC50	MAP kinase ERK2	-1	0.83	0.17
Asn0356	Ki	MAP kinase ERK2	-1	0.92	0.08
Asn0357	IC50	MAP kinase ERK1	-1	0.83	0.17
Asn0357	Ki	MAP kinase ERK1	-1	0.81	0.19
Asn0357	IC50	MAP kinase ERK2	-1	0.58	0.42
Asn0357	Ki	MAP kinase ERK2	-1	0.69	0.31
Asn0358	IC50	MAP kinase ERK1	-1	0.84	0.16
Asn0358	Ki	MAP kinase ERK1	-1	0.91	0.09
Asn0358	IC50	MAP kinase ERK2	-1	0.576	0.424
Asn0358	Ki	MAP kinase ERK2	-1	0.88	0.12
Asn0359	IC50	MAP kinase ERK1	-1	0.93	0.07
Asn0359	Ki	MAP kinase ERK1	-1	0.93	0.07
Asn0359	IC50	MAP kinase ERK2	-1	0.9	0.1
Asn0359	Ki	MAP kinase ERK2	-1	0.92	0.08
Asn0360	IC50	MAP kinase ERK1	-1	0.93	0.07
Asn0360	Ki	MAP kinase ERK1	-1	0.92	0.08
Asn0360	IC50	MAP kinase ERK2	-1	0.89	0.11
Asn0360	Ki	MAP kinase ERK2	-1	0.9167	0.0833
Asn0361	IC50	MAP kinase ERK1	-1	0.96	0.04
Asn0361	Ki	MAP kinase ERK1	-1	0.98	0.02
Asn0361	IC50	MAP kinase ERK2	-1	0.86	0.14
Asn0361	Ki	MAP kinase ERK2	-1	0.97	0.03
Asn0362	IC50	MAP kinase ERK1	-1	0.98	0.02
Asn0362	Ki	MAP kinase ERK1	-1	0.97	0.03
Asn0362	IC50	MAP kinase ERK2	-1	0.96	0.04
Asn0362	Ki	MAP kinase ERK2	-1	0.96	0.04
Asn0363	IC50	MAP kinase ERK1	-1	0.6614	0.3386
Asn0363	Ki	MAP kinase ERK1	-1	0.5114	0.4886
Asn0363	IC50	MAP kinase ERK2	1	0.495	0.505
Asn0363	Ki	MAP kinase ERK2	1	0.3567	0.6433
Asn0364	IC50	MAP kinase ERK1	-1	0.99	0.01
Asn0364	Ki	MAP kinase ERK1	-1	1	0
Asn0364	IC50	MAP kinase ERK2	-1	0.98	0.02
Asn0364	Ki	MAP kinase ERK2	-1	0.99	0.01
Asn0365	IC50	MAP kinase ERK1	-1	0.625	0.375
Asn0365	Ki	MAP kinase ERK1	-1	0.78	0.22
Asn0365	IC50	MAP kinase ERK2	-1	0.69	0.31
Asn0365	Ki	MAP kinase ERK2	1	0.375	0.625
Asn0366	IC50	MAP kinase ERK1	-1	0.77	0.23
Asn0366	Ki	MAP kinase ERK1	-1	0.75	0.25
Asn0366	IC50	MAP kinase ERK2	-1	0.7233	0.2767
Asn0366	Ki	MAP kinase ERK2	-1	0.72	0.28
Asn0367	IC50	MAP kinase ERK1	-1	0.77	0.23
Asn0367	Ki	MAP kinase ERK1	-1	0.79	0.21
Asn0367	IC50	MAP kinase ERK2	-1	0.7233	0.2767
Asn0367	Ki	MAP kinase ERK2	-1	0.73	0.27
Asn0368	IC50	MAP kinase ERK1	-1	0.83	0.17
Asn0368	Ki	MAP kinase ERK1	-1	0.84	0.16
Asn0368	IC50	MAP kinase ERK2	-1	0.66	0.34
Asn0368	Ki	MAP kinase ERK2	-1	0.73	0.27
Asn0369	IC50	MAP kinase ERK1	-1	0.85	0.15
Asn0369	Ki	MAP kinase ERK1	-1	0.85	0.15
Asn0369	IC50	MAP kinase ERK2	-1	0.7433	0.2567
Asn0369	Ki	MAP kinase ERK2	-1	0.76	0.24
Asn0370	IC50	MAP kinase ERK1	-1	0.86	0.14
Asn0370	Ki	MAP kinase ERK1	-1	0.86	0.14
Asn0370	IC50	MAP kinase ERK2	-1	0.7433	0.2567
Asn0370	Ki	MAP kinase ERK2	-1	0.76	0.24
Asn0371	IC50	MAP kinase ERK1	-1	0.73	0.27
Asn0371	Ki	MAP kinase ERK1	-1	0.75	0.25
Asn0371	IC50	MAP kinase ERK2	-1	0.5733	0.4267
Asn0371	Ki	MAP kinase ERK2	-1	0.67	0.33
Asn0372	IC50	MAP kinase ERK1	-1	0.92	0.08
Asn0372	Ki	MAP kinase ERK1	-1	0.97	0.03
Asn0372	IC50	MAP kinase ERK2	-1	0.88	0.12
Asn0372	Ki	MAP kinase ERK2	-1	0.9167	0.0833
Asn0373	IC50	MAP kinase ERK1	-1	0.93	0.07
Asn0373	Ki	MAP kinase ERK1	-1	0.95	0.05
Asn0373	IC50	MAP kinase ERK2	-1	0.92	0.08
Asn0373	Ki	MAP kinase ERK2	-1	0.96	0.04
Asn0374	IC50	MAP kinase ERK1	-1	0.97	0.03
Asn0374	Ki	MAP kinase ERK1	-1	0.98	0.02
Asn0374	IC50	MAP kinase ERK2	-1	0.9	0.1
Asn0374	Ki	MAP kinase ERK2	-1	0.96	0.04
Asn0375	IC50	MAP kinase ERK1	-1	0.96	0.04
Asn0375	Ki	MAP kinase ERK1	-1	0.95	0.05
Asn0375	IC50	MAP kinase ERK2	-1	0.89	0.11
Asn0375	Ki	MAP kinase ERK2	-1	0.89	0.11
Asn0376	IC50	MAP kinase ERK1	-1	0.89	0.11
Asn0376	Ki	MAP kinase ERK1	-1	1	0
Asn0376	IC50	MAP kinase ERK2	-1	0.73	0.27
Asn0376	Ki	MAP kinase ERK2	-1	0.885	0.115
Asn0377	IC50	MAP kinase ERK1	-1	0.9	0.1
Asn0377	Ki	MAP kinase ERK1	-1	0.94	0.06
Asn0377	IC50	MAP kinase ERK2	-1	0.87	0.13
Asn0377	Ki	MAP kinase ERK2	-1	0.93	0.07
Asn0378	IC50	MAP kinase ERK1	-1	0.94	0.06
Asn0378	Ki	MAP kinase ERK1	-1	0.96	0.04
Asn0378	IC50	MAP kinase ERK2	-1	0.91	0.09
Asn0378	Ki	MAP kinase ERK2	-1	0.96	0.04
Asn0379	IC50	MAP kinase ERK1	-1	0.88	0.12
Asn0379	Ki	MAP kinase ERK1	-1	0.92	0.08
Asn0379	IC50	MAP kinase ERK2	-1	0.86	0.14
Asn0379	Ki	MAP kinase ERK2	-1	0.94	0.06
Asn0380	IC50	MAP kinase ERK1	-1	0.86	0.14
Asn0380	Ki	MAP kinase ERK1	-1	0.98	0.02
Asn0380	IC50	MAP kinase ERK2	-1	0.725	0.275
Asn0380	Ki	MAP kinase ERK2	-1	0.91	0.09
Asn0381	IC50	MAP kinase ERK1	-1	0.62	0.38
Asn0381	Ki	MAP kinase ERK1	-1	0.7	0.3
Asn0381	IC50	MAP kinase ERK2	-1	0.56	0.44
Asn0381	Ki	MAP kinase ERK2	1	0.44	0.56
Asn0382	IC50	MAP kinase ERK1	-1	0.86	0.14
Asn0382	Ki	MAP kinase ERK1	-1	0.8	0.2
Asn0382	IC50	MAP kinase ERK2	-1	0.7133	0.2867
Asn0382	Ki	MAP kinase ERK2	-1	0.73	0.27
Asn0383	IC50	MAP kinase ERK1	-1	0.86	0.14
Asn0383	Ki	MAP kinase ERK1	-1	0.78	0.22
Asn0383	IC50	MAP kinase ERK2	-1	0.7233	0.2767
Asn0383	Ki	MAP kinase ERK2	-1	0.8	0.2
Asn0384	IC50	MAP kinase ERK1	-1	0.94	0.06
Asn0384	Ki	MAP kinase ERK1	-1	0.92	0.08
Asn0384	IC50	MAP kinase ERK2	-1	0.87	0.13
Asn0384	Ki	MAP kinase ERK2	-1	0.87	0.13
Asn0385	IC50	MAP kinase ERK1	-1	0.89	0.11
Asn0385	Ki	MAP kinase ERK1	-1	0.97	0.03
Asn0385	IC50	MAP kinase ERK2	-1	0.83	0.17
Asn0385	Ki	MAP kinase ERK2	-1	0.93	0.07
Asn0386	IC50	MAP kinase ERK1	-1	0.98	0.02
Asn0386	Ki	MAP kinase ERK1	-1	0.97	0.03
Asn0386	IC50	MAP kinase ERK2	-1	0.94	0.06
Asn0386	Ki	MAP kinase ERK2	-1	0.93	0.07
Asn0387	IC50	MAP kinase ERK1	-1	0.98	0.02
Asn0387	Ki	MAP kinase ERK1	-1	0.96	0.04
Asn0387	IC50	MAP kinase ERK2	-1	0.96	0.04
Asn0387	Ki	MAP kinase ERK2	-1	0.94	0.06
Asn0388	IC50	MAP kinase ERK1	-1	0.92	0.08
Asn0388	Ki	MAP kinase ERK1	-1	0.92	0.08
Asn0388	IC50	MAP kinase ERK2	-1	0.82	0.18
Asn0388	Ki	MAP kinase ERK2	-1	0.85	0.15
Asn0389	IC50	MAP kinase ERK1	-1	0.96	0.04
Asn0389	Ki	MAP kinase ERK1	-1	0.97	0.03
Asn0389	IC50	MAP kinase ERK2	-1	0.98	0.02
Asn0389	Ki	MAP kinase ERK2	-1	0.98	0.02
Asn0390	IC50	MAP kinase ERK1	-1	0.86	0.14
Asn0390	Ki	MAP kinase ERK1	-1	0.96	0.04
Asn0390	IC50	MAP kinase ERK2	-1	0.79	0.21
Asn0390	Ki	MAP kinase ERK2	-1	0.93	0.07
Asn0391	IC50	MAP kinase ERK1	-1	0.9	0.1
Asn0391	Ki	MAP kinase ERK1	-1	0.75	0.25
Asn0391	IC50	MAP kinase ERK2	-1	0.71	0.29
Asn0391	Ki	MAP kinase ERK2	-1	0.64	0.36
Asn0392	IC50	MAP kinase ERK1	-1	0.85	0.15
Asn0392	Ki	MAP kinase ERK1	-1	0.94	0.06
Asn0392	IC50	MAP kinase ERK2	-1	0.87	0.13
Asn0392	Ki	MAP kinase ERK2	-1	0.94	0.06
Asn0393	IC50	MAP kinase ERK1	-1	0.85	0.15
Asn0393	Ki	MAP kinase ERK1	-1	0.97	0.03
Asn0393	IC50	MAP kinase ERK2	-1	0.75	0.25
Asn0393	Ki	MAP kinase ERK2	-1	0.93	0.07
Asn0394	IC50	MAP kinase ERK1	-1	0.84	0.16
Asn0394	Ki	MAP kinase ERK1	-1	0.9167	0.0833
Asn0394	IC50	MAP kinase ERK2	-1	0.7	0.3
Asn0394	Ki	MAP kinase ERK2	-1	0.8167	0.1833
Asn0395	IC50	MAP kinase ERK1	-1	0.79	0.21
Asn0395	Ki	MAP kinase ERK1	-1	0.92	0.08
Asn0395	IC50	MAP kinase ERK2	-1	0.61	0.39
Asn0395	Ki	MAP kinase ERK2	-1	0.7667	0.2333
Asn0396	IC50	MAP kinase ERK1	-1	0.91	0.09
Asn0396	Ki	MAP kinase ERK1	-1	0.884	0.116
Asn0396	IC50	MAP kinase ERK2	-1	0.85	0.15
Asn0396	Ki	MAP kinase ERK2	-1	0.804	0.196
Asn0397	IC50	MAP kinase ERK1	-1	0.89	0.11
Asn0397	Ki	MAP kinase ERK1	-1	0.76	0.24
Asn0397	IC50	MAP kinase ERK2	-1	0.82	0.18
Asn0397	Ki	MAP kinase ERK2	-1	0.65	0.35
Asn0398	IC50	MAP kinase ERK1	-1	0.92	0.08
Asn0398	Ki	MAP kinase ERK1	-1	0.74	0.26
Asn0398	IC50	MAP kinase ERK2	-1	0.89	0.11
Asn0398	Ki	MAP kinase ERK2	-1	0.72	0.28
Asn0399	IC50	MAP kinase ERK1	-1	0.83	0.17
Asn0399	Ki	MAP kinase ERK1	-1	0.93	0.07
Asn0399	IC50	MAP kinase ERK2	-1	0.72	0.28
Asn0399	Ki	MAP kinase ERK2	-1	0.88	0.12
Asn0400	IC50	MAP kinase ERK1	-1	0.94	0.06
Asn0400	Ki	MAP kinase ERK1	-1	0.97	0.03
Asn0400	IC50	MAP kinase ERK2	-1	0.93	0.07
Asn0400	Ki	MAP kinase ERK2	-1	0.97	0.03
Asn0401	IC50	MAP kinase ERK1	-1	0.89	0.11
Asn0401	Ki	MAP kinase ERK1	-1	0.93	0.07
Asn0401	IC50	MAP kinase ERK2	-1	0.75	0.25
Asn0401	Ki	MAP kinase ERK2	-1	0.84	0.16
Asn0402	IC50	MAP kinase ERK1	-1	0.94	0.06
Asn0402	Ki	MAP kinase ERK1	-1	0.97	0.03
Asn0402	IC50	MAP kinase ERK2	-1	0.925	0.075
Asn0402	Ki	MAP kinase ERK2	-1	0.98	0.02
Asn0403	IC50	MAP kinase ERK1	-1	0.98	0.02
Asn0403	Ki	MAP kinase ERK1	-1	0.97	0.03
Asn0403	IC50	MAP kinase ERK2	-1	0.93	0.07
Asn0403	Ki	MAP kinase ERK2	-1	0.875	0.125
Asn0404	IC50	MAP kinase ERK1	-1	0.88	0.12
Asn0404	Ki	MAP kinase ERK1	-1	0.9	0.1
Asn0404	IC50	MAP kinase ERK2	-1	0.8	0.2
Asn0404	Ki	MAP kinase ERK2	-1	0.88	0.12
Asn0405	IC50	MAP kinase ERK1	-1	0.95	0.05
Asn0405	Ki	MAP kinase ERK1	-1	0.88	0.12
Asn0405	IC50	MAP kinase ERK2	-1	0.934	0.066
Asn0405	Ki	MAP kinase ERK2	-1	0.8233	0.1767
Asn0406	IC50	MAP kinase ERK1	-1	0.93	0.07
Asn0406	Ki	MAP kinase ERK1	-1	0.98	0.02
Asn0406	IC50	MAP kinase ERK2	-1	0.9	0.1
Asn0406	Ki	MAP kinase ERK2	-1	0.97	0.03
Asn0407	IC50	MAP kinase ERK1	-1	0.91	0.09
Asn0407	Ki	MAP kinase ERK1	-1	0.98	0.02
Asn0407	IC50	MAP kinase ERK2	-1	0.89	0.11
Asn0407	Ki	MAP kinase ERK2	-1	0.97	0.03
Asn0408	IC50	MAP kinase ERK1	-1	0.88	0.12
Asn0408	Ki	MAP kinase ERK1	-1	0.96	0.04
Asn0408	IC50	MAP kinase ERK2	-1	0.7775	0.2225
Asn0408	Ki	MAP kinase ERK2	-1	0.906	0.094
Asn0409	IC50	MAP kinase ERK1	-1	0.88	0.12
Asn0409	Ki	MAP kinase ERK1	-1	0.97	0.03
Asn0409	IC50	MAP kinase ERK2	-1	0.89	0.11
Asn0409	Ki	MAP kinase ERK2	-1	0.93	0.07
Asn0410	IC50	MAP kinase ERK1	-1	0.84	0.16
Asn0410	Ki	MAP kinase ERK1	-1	0.91	0.09
Asn0410	IC50	MAP kinase ERK2	-1	0.76	0.24
Asn0410	Ki	MAP kinase ERK2	-1	0.82	0.18
Asn0411	IC50	MAP kinase ERK1	-1	0.96	0.04
Asn0411	Ki	MAP kinase ERK1	-1	0.9433	0.0567
Asn0411	IC50	MAP kinase ERK2	-1	0.94	0.06
Asn0411	Ki	MAP kinase ERK2	-1	0.9333	0.0667
Asn0412	IC50	MAP kinase ERK1	-1	0.92	0.08
Asn0412	Ki	MAP kinase ERK1	-1	0.96	0.04
Asn0412	IC50	MAP kinase ERK2	-1	0.9067	0.0933
Asn0412	Ki	MAP kinase ERK2	-1	0.9467	0.0533
Asn0413	IC50	MAP kinase ERK1	-1	0.96	0.04
Asn0413	Ki	MAP kinase ERK1	-1	0.97	0.03
Asn0413	IC50	MAP kinase ERK2	-1	0.965	0.035
Asn0413	Ki	MAP kinase ERK2	-1	0.97	0.03
Asn0414	IC50	MAP kinase ERK1	-1	0.94	0.06
Asn0414	Ki	MAP kinase ERK1	-1	1	0
Asn0414	IC50	MAP kinase ERK2	-1	0.85	0.15
Asn0414	Ki	MAP kinase ERK2	-1	0.96	0.04
Asn0415	IC50	MAP kinase ERK1	-1	0.81	0.19
Asn0415	Ki	MAP kinase ERK1	-1	0.8	0.2
Asn0415	IC50	MAP kinase ERK2	-1	0.7433	0.2567
Asn0415	Ki	MAP kinase ERK2	-1	0.78	0.22
Asn0416	IC50	MAP kinase ERK1	-1	0.98	0.02
Asn0416	Ki	MAP kinase ERK1	-1	1	0
Asn0416	IC50	MAP kinase ERK2	-1	0.97	0.03
Asn0416	Ki	MAP kinase ERK2	-1	0.99	0.01
Asn0417	IC50	MAP kinase ERK1	-1	0.96	0.04
Asn0417	Ki	MAP kinase ERK1	-1	0.97	0.03
Asn0417	IC50	MAP kinase ERK2	-1	0.9	0.1
Asn0417	Ki	MAP kinase ERK2	-1	0.95	0.05
Asn0418	IC50	MAP kinase ERK1	-1	0.93	0.07
Asn0418	Ki	MAP kinase ERK1	-1	0.98	0.02
Asn0418	IC50	MAP kinase ERK2	-1	0.92	0.08
Asn0418	Ki	MAP kinase ERK2	-1	0.97	0.03
Asn0419	IC50	MAP kinase ERK1	-1	0.95	0.05
Asn0419	Ki	MAP kinase ERK1	-1	0.98	0.02
Asn0419	IC50	MAP kinase ERK2	-1	0.95	0.05
Asn0419	Ki	MAP kinase ERK2	-1	0.98	0.02
Asn0420	IC50	MAP kinase ERK1	-1	0.9867	0.0133
Asn0420	Ki	MAP kinase ERK1	-1	1	0
Asn0420	IC50	MAP kinase ERK2	-1	0.9467	0.0533
Asn0420	Ki	MAP kinase ERK2	-1	0.99	0.01
Asn0421	IC50	MAP kinase ERK1	-1	0.94	0.06
Asn0421	Ki	MAP kinase ERK1	-1	0.97	0.03
Asn0421	IC50	MAP kinase ERK2	-1	0.92	0.08
Asn0421	Ki	MAP kinase ERK2	-1	0.96	0.04
Asn0422	IC50	MAP kinase ERK1	-1	0.92	0.08
Asn0422	Ki	MAP kinase ERK1	-1	0.94	0.06
Asn0422	IC50	MAP kinase ERK2	-1	0.86	0.14
Asn0422	Ki	MAP kinase ERK2	-1	0.91	0.09
Asn0423	IC50	MAP kinase ERK1	-1	0.86	0.14
Asn0423	Ki	MAP kinase ERK1	-1	0.95	0.05
Asn0423	IC50	MAP kinase ERK2	-1	0.8	0.2
Asn0423	Ki	MAP kinase ERK2	-1	0.95	0.05
Asn0424	IC50	MAP kinase ERK1	-1	0.875	0.125
Asn0424	Ki	MAP kinase ERK1	-1	0.95	0.05
Asn0424	IC50	MAP kinase ERK2	-1	0.82	0.18
Asn0424	Ki	MAP kinase ERK2	-1	0.9	0.1
Asn0425	IC50	MAP kinase ERK1	-1	0.96	0.04
Asn0425	Ki	MAP kinase ERK1	-1	0.98	0.02
Asn0425	IC50	MAP kinase ERK2	-1	0.93	0.07
Asn0425	Ki	MAP kinase ERK2	-1	0.96	0.04
Asn0426	IC50	MAP kinase ERK1	-1	0.97	0.03
Asn0426	Ki	MAP kinase ERK1	-1	0.96	0.04
Asn0426	IC50	MAP kinase ERK2	-1	0.94	0.06
Asn0426	Ki	MAP kinase ERK2	-1	0.935	0.065
Asn0427	IC50	MAP kinase ERK1	-1	0.96	0.04
Asn0427	Ki	MAP kinase ERK1	-1	1	0
Asn0427	IC50	MAP kinase ERK2	-1	0.93	0.07
Asn0427	Ki	MAP kinase ERK2	-1	0.97	0.03
Asn0428	IC50	MAP kinase ERK1	-1	0.93	0.07
Asn0428	Ki	MAP kinase ERK1	-1	0.97	0.03
Asn0428	IC50	MAP kinase ERK2	-1	0.9	0.1
Asn0428	Ki	MAP kinase ERK2	-1	0.92	0.08
Asn0429	IC50	MAP kinase ERK1	-1	0.99	0.01
Asn0429	Ki	MAP kinase ERK1	-1	0.974	0.026
Asn0429	IC50	MAP kinase ERK2	-1	0.99	0.01
Asn0429	Ki	MAP kinase ERK2	-1	0.984	0.016
Asn0430	IC50	MAP kinase ERK1	-1	0.95	0.05
Asn0430	Ki	MAP kinase ERK1	-1	0.97	0.03
Asn0430	IC50	MAP kinase ERK2	-1	0.92	0.08
Asn0430	Ki	MAP kinase ERK2	-1	0.95	0.05
Asn0431	IC50	MAP kinase ERK1	-1	0.96	0.04
Asn0431	Ki	MAP kinase ERK1	-1	1	0
Asn0431	IC50	MAP kinase ERK2	-1	0.95	0.05
Asn0431	Ki	MAP kinase ERK2	-1	0.99	0.01
Asn0432	IC50	MAP kinase ERK1	-1	0.88	0.12
Asn0432	Ki	MAP kinase ERK1	-1	0.92	0.08
Asn0432	IC50	MAP kinase ERK2	-1	0.8425	0.1575
Asn0432	Ki	MAP kinase ERK2	-1	0.8767	0.1233
Asn0433	IC50	MAP kinase ERK1	-1	0.97	0.03
Asn0433	Ki	MAP kinase ERK1	-1	0.99	0.01
Asn0433	IC50	MAP kinase ERK2	-1	0.97	0.03
Asn0433	Ki	MAP kinase ERK2	-1	0.99	0.01
Asn0434	IC50	MAP kinase ERK1	-1	0.98	0.02
Asn0434	Ki	MAP kinase ERK1	-1	0.95	0.05
Asn0434	IC50	MAP kinase ERK2	-1	0.96	0.04
Asn0434	Ki	MAP kinase ERK2	-1	0.925	0.075
Asn0435	IC50	MAP kinase ERK1	-1	0.91	0.09
Asn0435	Ki	MAP kinase ERK1	-1	0.97	0.03
Asn0435	IC50	MAP kinase ERK2	-1	0.83	0.17
Asn0435	Ki	MAP kinase ERK2	-1	0.95	0.05
Asn0436	IC50	MAP kinase ERK1	-1	0.98	0.02
Asn0436	Ki	MAP kinase ERK1	-1	0.94	0.06
Asn0436	IC50	MAP kinase ERK2	-1	0.915	0.085
Asn0436	Ki	MAP kinase ERK2	-1	0.8883	0.1117
Asn0437	IC50	MAP kinase ERK1	-1	0.925	0.075
Asn0437	Ki	MAP kinase ERK1	-1	0.955	0.045
Asn0437	IC50	MAP kinase ERK2	-1	0.85	0.15
Asn0437	Ki	MAP kinase ERK2	-1	0.94	0.06
Asn0438	IC50	MAP kinase ERK1	-1	0.9	0.1
Asn0438	Ki	MAP kinase ERK1	-1	0.94	0.06
Asn0438	IC50	MAP kinase ERK2	-1	0.854	0.146
Asn0438	Ki	MAP kinase ERK2	-1	0.8767	0.1233
Asn0439	IC50	MAP kinase ERK1	-1	0.81	0.19
Asn0439	Ki	MAP kinase ERK1	-1	0.82	0.18
Asn0439	IC50	MAP kinase ERK2	-1	0.6833	0.3167
Asn0439	Ki	MAP kinase ERK2	-1	0.6833	0.3167
Asn0440	IC50	MAP kinase ERK1	-1	0.835	0.165
Asn0440	Ki	MAP kinase ERK1	-1	0.8483	0.1517
Asn0440	IC50	MAP kinase ERK2	-1	0.7033	0.2967
Asn0440	Ki	MAP kinase ERK2	-1	0.8133	0.1867
Asn0441	IC50	MAP kinase ERK1	-1	0.745	0.255
Asn0441	Ki	MAP kinase ERK1	-1	0.95	0.05
Asn0441	IC50	MAP kinase ERK2	-1	0.72	0.28
Asn0441	Ki	MAP kinase ERK2	-1	0.9167	0.0833
Asn0442	IC50	MAP kinase ERK1	-1	0.76	0.24
Asn0442	Ki	MAP kinase ERK1	-1	0.91	0.09
Asn0442	IC50	MAP kinase ERK2	-1	0.75	0.25
Asn0442	Ki	MAP kinase ERK2	-1	0.8767	0.1233
Asn0443	IC50	MAP kinase ERK1	-1	0.95	0.05
Asn0443	Ki	MAP kinase ERK1	-1	0.96	0.04
Asn0443	IC50	MAP kinase ERK2	-1	0.88	0.12
Asn0443	Ki	MAP kinase ERK2	-1	0.91	0.09
Asn0444	IC50	MAP kinase ERK1	-1	0.99	0.01
Asn0444	Ki	MAP kinase ERK1	-1	0.99	0.01
Asn0444	IC50	MAP kinase ERK2	-1	0.97	0.03
Asn0444	Ki	MAP kinase ERK2	-1	0.99	0.01
Asn0445	IC50	MAP kinase ERK1	-1	0.9	0.1
Asn0445	Ki	MAP kinase ERK1	-1	0.9133	0.0867
Asn0445	IC50	MAP kinase ERK2	-1	0.73	0.27
Asn0445	Ki	MAP kinase ERK2	-1	0.8433	0.1567
Asn0446	IC50	MAP kinase ERK1	-1	0.88	0.12
Asn0446	Ki	MAP kinase ERK1	-1	0.8967	0.1033
Asn0446	IC50	MAP kinase ERK2	-1	0.73	0.27
Asn0446	Ki	MAP kinase ERK2	-1	0.8433	0.1567
Asn0447	IC50	MAP kinase ERK1	-1	0.8725	0.1275
Asn0447	Ki	MAP kinase ERK1	-1	0.91	0.09
Asn0447	IC50	MAP kinase ERK2	-1	0.8025	0.1975
Asn0447	Ki	MAP kinase ERK2	-1	0.9	0.1
Asn0448	IC50	MAP kinase ERK1	-1	0.99	0.01
Asn0448	Ki	MAP kinase ERK1	-1	0.98	0.02
Asn0448	IC50	MAP kinase ERK2	-1	0.99	0.01
Asn0448	Ki	MAP kinase ERK2	-1	0.98	0.02
Asn0449	IC50	MAP kinase ERK1	-1	0.91	0.09
Asn0449	Ki	MAP kinase ERK1	-1	0.99	0.01
Asn0449	IC50	MAP kinase ERK2	-1	0.84	0.16
Asn0449	Ki	MAP kinase ERK2	-1	0.98	0.02
Asn0450	IC50	MAP kinase ERK1	-1	0.95	0.05
Asn0450	Ki	MAP kinase ERK1	-1	0.98	0.02
Asn0450	IC50	MAP kinase ERK2	-1	0.91	0.09
Asn0450	Ki	MAP kinase ERK2	-1	0.97	0.03
Asn0451	IC50	MAP kinase ERK1	-1	0.96	0.04
Asn0451	Ki	MAP kinase ERK1	-1	0.95	0.05
Asn0451	IC50	MAP kinase ERK2	-1	0.92	0.08
Asn0451	Ki	MAP kinase ERK2	-1	0.96	0.04
Asn0452	IC50	MAP kinase ERK1	-1	0.96	0.04
Asn0452	Ki	MAP kinase ERK1	-1	0.95	0.05
Asn0452	IC50	MAP kinase ERK2	-1	0.9	0.1
Asn0452	Ki	MAP kinase ERK2	-1	0.9	0.1
Asn0453	IC50	MAP kinase ERK1	-1	0.83	0.17
Asn0453	Ki	MAP kinase ERK1	-1	0.92	0.08
Asn0453	IC50	MAP kinase ERK2	-1	0.78	0.22
Asn0453	Ki	MAP kinase ERK2	-1	0.85	0.15
Asn0454	IC50	MAP kinase ERK1	-1	0.88	0.12
Asn0454	Ki	MAP kinase ERK1	-1	0.91	0.09
Asn0454	IC50	MAP kinase ERK2	-1	0.74	0.26
Asn0454	Ki	MAP kinase ERK2	-1	0.795	0.205
Asn0455	IC50	MAP kinase ERK1	-1	0.96	0.04
Asn0455	Ki	MAP kinase ERK1	-1	1	0
Asn0455	IC50	MAP kinase ERK2	-1	0.95	0.05
Asn0455	Ki	MAP kinase ERK2	-1	0.98	0.02
Asn0456	IC50	MAP kinase ERK1	-1	0.96	0.04
Asn0456	Ki	MAP kinase ERK1	-1	0.97	0.03
Asn0456	IC50	MAP kinase ERK2	-1	0.89	0.11
Asn0456	Ki	MAP kinase ERK2	-1	0.95	0.05
Asn0457	IC50	MAP kinase ERK1	-1	0.94	0.06
Asn0457	Ki	MAP kinase ERK1	-1	1	0
Asn0457	IC50	MAP kinase ERK2	-1	0.885	0.115
Asn0457	Ki	MAP kinase ERK2	-1	0.99	0.01
Asn0458	IC50	MAP kinase ERK1	-1	0.97	0.03
Asn0458	Ki	MAP kinase ERK1	-1	0.98	0.02
Asn0458	IC50	MAP kinase ERK2	-1	0.935	0.065
Asn0458	Ki	MAP kinase ERK2	-1	0.96	0.04
Asn0459	IC50	MAP kinase ERK1	-1	0.97	0.03
Asn0459	Ki	MAP kinase ERK1	-1	1	0
Asn0459	IC50	MAP kinase ERK2	-1	0.9	0.1
Asn0459	Ki	MAP kinase ERK2	-1	0.98	0.02
Asn0460	IC50	MAP kinase ERK1	-1	0.96	0.04
Asn0460	Ki	MAP kinase ERK1	-1	0.98	0.02
Asn0460	IC50	MAP kinase ERK2	-1	0.915	0.085
Asn0460	Ki	MAP kinase ERK2	-1	0.98	0.02
Asn0461	IC50	MAP kinase ERK1	-1	1	0
Asn0461	Ki	MAP kinase ERK1	-1	1	0
Asn0461	IC50	MAP kinase ERK2	-1	1	0
Asn0461	Ki	MAP kinase ERK2	-1	1	0
Asn0462	IC50	MAP kinase ERK1	-1	0.96	0.04
Asn0462	Ki	MAP kinase ERK1	-1	0.99	0.01
Asn0462	IC50	MAP kinase ERK2	-1	0.95	0.05
Asn0462	Ki	MAP kinase ERK2	-1	0.99	0.01
Asn0463	IC50	MAP kinase ERK1	-1	0.941	0.059
Asn0463	Ki	MAP kinase ERK1	-1	0.98	0.02
Asn0463	IC50	MAP kinase ERK2	-1	0.906	0.094
Asn0463	Ki	MAP kinase ERK2	-1	0.97	0.03
Asn0464	IC50	MAP kinase ERK1	-1	0.93	0.07
Asn0464	Ki	MAP kinase ERK1	-1	0.94	0.06
Asn0464	IC50	MAP kinase ERK2	-1	0.9	0.1
Asn0464	Ki	MAP kinase ERK2	-1	0.91	0.09
Asn0465	IC50	MAP kinase ERK1	-1	0.93	0.07
Asn0465	Ki	MAP kinase ERK1	-1	0.96	0.04
Asn0465	IC50	MAP kinase ERK2	-1	0.89	0.11
Asn0465	Ki	MAP kinase ERK2	-1	0.92	0.08
Asn0466	IC50	MAP kinase ERK1	-1	0.86	0.14
Asn0466	Ki	MAP kinase ERK1	-1	0.8575	0.1425
Asn0466	IC50	MAP kinase ERK2	-1	0.83	0.17
Asn0466	Ki	MAP kinase ERK2	-1	0.8175	0.1825
Asn0467	IC50	MAP kinase ERK1	-1	0.93	0.07
Asn0467	Ki	MAP kinase ERK1	-1	0.89	0.11
Asn0467	IC50	MAP kinase ERK2	-1	0.88	0.12
Asn0467	Ki	MAP kinase ERK2	-1	0.79	0.21
Asn0468	IC50	MAP kinase ERK1	-1	0.98	0.02
Asn0468	Ki	MAP kinase ERK1	-1	0.99	0.01
Asn0468	IC50	MAP kinase ERK2	-1	0.93	0.07
Asn0468	Ki	MAP kinase ERK2	-1	0.96	0.04
Asn0469	IC50	MAP kinase ERK1	-1	0.88	0.12
Asn0469	Ki	MAP kinase ERK1	-1	0.98	0.02
Asn0469	IC50	MAP kinase ERK2	-1	0.81	0.19
Asn0469	Ki	MAP kinase ERK2	-1	0.95	0.05
Asn0470	IC50	MAP kinase ERK1	-1	0.835	0.165
Asn0470	Ki	MAP kinase ERK1	-1	0.78	0.22
Asn0470	IC50	MAP kinase ERK2	-1	0.695	0.305
Asn0470	Ki	MAP kinase ERK2	-1	0.67	0.33
Asn0471	IC50	MAP kinase ERK1	-1	0.74	0.26
Asn0471	Ki	MAP kinase ERK1	-1	0.73	0.27
Asn0471	IC50	MAP kinase ERK2	-1	0.6433	0.3567
Asn0471	Ki	MAP kinase ERK2	-1	0.64	0.36
Asn0472	IC50	MAP kinase ERK1	-1	0.77	0.23
Asn0472	Ki	MAP kinase ERK1	-1	0.73	0.27
Asn0472	IC50	MAP kinase ERK2	-1	0.6733	0.3267
Asn0472	Ki	MAP kinase ERK2	-1	0.62	0.38
Asn0473	IC50	MAP kinase ERK1	-1	0.63	0.37
Asn0473	Ki	MAP kinase ERK1	-1	0.6514	0.3486
Asn0473	IC50	MAP kinase ERK2	1	0.5	0.5
Asn0473	Ki	MAP kinase ERK2	1	0.48	0.52
Asn0474	IC50	MAP kinase ERK1	-1	0.81	0.19
Asn0474	Ki	MAP kinase ERK1	-1	0.82	0.18
Asn0474	IC50	MAP kinase ERK2	-1	0.7433	0.2567
Asn0474	Ki	MAP kinase ERK2	-1	0.74	0.26
Asn0475	IC50	MAP kinase ERK1	-1	0.81	0.19
Asn0475	Ki	MAP kinase ERK1	-1	0.8	0.2
Asn0475	IC50	MAP kinase ERK2	-1	0.7533	0.2467
Asn0475	Ki	MAP kinase ERK2	-1	0.74	0.26
Asn0476	IC50	MAP kinase ERK1	-1	0.58	0.42
Asn0476	Ki	MAP kinase ERK1	-1	0.73	0.27
Asn0476	IC50	MAP kinase ERK2	-1	0.54	0.46
Asn0476	Ki	MAP kinase ERK2	1	0.44	0.56
Asn0477	IC50	MAP kinase ERK1	-1	0.89	0.11
Asn0477	Ki	MAP kinase ERK1	-1	0.9133	0.0867
Asn0477	IC50	MAP kinase ERK2	-1	0.72	0.28
Asn0477	Ki	MAP kinase ERK2	-1	0.8433	0.1567
Asn0478	IC50	MAP kinase ERK1	-1	0.9	0.1
Asn0478	Ki	MAP kinase ERK1	-1	0.86	0.14
Asn0478	IC50	MAP kinase ERK2	-1	0.77	0.23
Asn0478	Ki	MAP kinase ERK2	-1	0.75	0.25
Asn0479	IC50	MAP kinase ERK1	-1	0.8	0.2
Asn0479	Ki	MAP kinase ERK1	-1	0.81	0.19
Asn0479	IC50	MAP kinase ERK2	-1	0.74	0.26
Asn0479	Ki	MAP kinase ERK2	-1	0.74	0.26
Asn0480	IC50	MAP kinase ERK1	-1	0.76	0.24
Asn0480	Ki	MAP kinase ERK1	-1	0.84	0.16
Asn0480	IC50	MAP kinase ERK2	-1	0.72	0.28
Asn0480	Ki	MAP kinase ERK2	-1	0.79	0.21
Asn0481	IC50	MAP kinase ERK1	-1	0.88	0.12
Asn0481	Ki	MAP kinase ERK1	-1	0.85	0.15
Asn0481	IC50	MAP kinase ERK2	-1	0.79	0.21
Asn0481	Ki	MAP kinase ERK2	-1	0.78	0.22
Asn0482	IC50	MAP kinase ERK1	-1	0.895	0.105
Asn0482	Ki	MAP kinase ERK1	-1	0.97	0.03
Asn0482	IC50	MAP kinase ERK2	-1	0.845	0.155
Asn0482	Ki	MAP kinase ERK2	-1	0.96	0.04
Asn0483	IC50	MAP kinase ERK1	-1	0.845	0.155
Asn0483	Ki	MAP kinase ERK1	-1	0.98	0.02
Asn0483	IC50	MAP kinase ERK2	-1	0.835	0.165
Asn0483	Ki	MAP kinase ERK2	-1	0.94	0.06
Asn0484	IC50	MAP kinase ERK1	-1	0.88	0.12
Asn0484	Ki	MAP kinase ERK1	-1	0.95	0.05
Asn0484	IC50	MAP kinase ERK2	-1	0.82	0.18
Asn0484	Ki	MAP kinase ERK2	-1	0.91	0.09
Asn0485	IC50	MAP kinase ERK1	-1	0.89	0.11
Asn0485	Ki	MAP kinase ERK1	-1	0.95	0.05
Asn0485	IC50	MAP kinase ERK2	-1	0.83	0.17
Asn0485	Ki	MAP kinase ERK2	-1	0.92	0.08
Asn0486	IC50	MAP kinase ERK1	-1	0.82	0.18
Asn0486	Ki	MAP kinase ERK1	-1	0.94	0.06
Asn0486	IC50	MAP kinase ERK2	-1	0.8	0.2
Asn0486	Ki	MAP kinase ERK2	-1	0.93	0.07
Asn0487	IC50	MAP kinase ERK1	-1	0.82	0.18
Asn0487	Ki	MAP kinase ERK1	-1	0.93	0.07
Asn0487	IC50	MAP kinase ERK2	-1	0.79	0.21
Asn0487	Ki	MAP kinase ERK2	-1	0.93	0.07
Asn0488	IC50	MAP kinase ERK1	-1	0.82	0.18
Asn0488	Ki	MAP kinase ERK1	-1	0.95	0.05
Asn0488	IC50	MAP kinase ERK2	-1	0.78	0.22
Asn0488	Ki	MAP kinase ERK2	-1	0.91	0.09
Asn0489	IC50	MAP kinase ERK1	-1	0.88	0.12
Asn0489	Ki	MAP kinase ERK1	-1	0.97	0.03
Asn0489	IC50	MAP kinase ERK2	-1	0.72	0.28
Asn0489	Ki	MAP kinase ERK2	-1	0.92	0.08
Asn0490	IC50	MAP kinase ERK1	-1	0.795	0.205
Asn0490	Ki	MAP kinase ERK1	-1	0.86	0.14
Asn0490	IC50	MAP kinase ERK2	-1	0.745	0.255
Asn0490	Ki	MAP kinase ERK2	-1	0.825	0.175
Asn0491	IC50	MAP kinase ERK1	-1	0.84	0.16
Asn0491	Ki	MAP kinase ERK1	-1	0.92	0.08
Asn0491	IC50	MAP kinase ERK2	-1	0.79	0.21
Asn0491	Ki	MAP kinase ERK2	-1	0.89	0.11
Asn0492	IC50	MAP kinase ERK1	-1	0.815	0.185
Asn0492	Ki	MAP kinase ERK1	-1	0.95	0.05
Asn0492	IC50	MAP kinase ERK2	-1	0.795	0.205
Asn0492	Ki	MAP kinase ERK2	-1	0.94	0.06
Asn0493	IC50	MAP kinase ERK1	-1	0.87	0.13
Asn0493	Ki	MAP kinase ERK1	-1	0.95	0.05
Asn0493	IC50	MAP kinase ERK2	-1	0.81	0.19
Asn0493	Ki	MAP kinase ERK2	-1	0.89	0.11
Asn0494	IC50	MAP kinase ERK1	-1	0.84	0.16
Asn0494	Ki	MAP kinase ERK1	-1	0.8	0.2
Asn0494	IC50	MAP kinase ERK2	-1	0.77	0.23
Asn0494	Ki	MAP kinase ERK2	-1	0.75	0.25
Asn0495	IC50	MAP kinase ERK1	-1	0.96	0.04
Asn0495	Ki	MAP kinase ERK1	-1	1	0
Asn0495	IC50	MAP kinase ERK2	-1	0.96	0.04
Asn0495	Ki	MAP kinase ERK2	-1	0.98	0.02
Asn0496	IC50	MAP kinase ERK1	-1	0.97	0.03
Asn0496	Ki	MAP kinase ERK1	-1	0.97	0.03
Asn0496	IC50	MAP kinase ERK2	-1	0.94	0.06
Asn0496	Ki	MAP kinase ERK2	-1	0.97	0.03
Asn0497	IC50	MAP kinase ERK1	-1	1	0
Asn0497	Ki	MAP kinase ERK1	-1	1	0
Asn0497	IC50	MAP kinase ERK2	-1	1	0
Asn0497	Ki	MAP kinase ERK2	-1	0.99	0.01
Asn0498	IC50	MAP kinase ERK1	-1	0.89	0.11
Asn0498	Ki	MAP kinase ERK1	-1	0.94	0.06
Asn0498	IC50	MAP kinase ERK2	-1	0.85	0.15
Asn0498	Ki	MAP kinase ERK2	-1	0.89	0.11
Asn0499	IC50	MAP kinase ERK1	-1	0.97	0.03
Asn0499	Ki	MAP kinase ERK1	-1	0.98	0.02
Asn0499	IC50	MAP kinase ERK2	-1	0.92	0.08
Asn0499	Ki	MAP kinase ERK2	-1	0.96	0.04
Asn0500	IC50	MAP kinase ERK1	-1	0.93	0.07
Asn0500	Ki	MAP kinase ERK1	-1	0.97	0.03
Asn0500	IC50	MAP kinase ERK2	-1	0.895	0.105
[truncated: 24,154 more rows]
